# Supplementary material for: Understanding the response in Pugionium cornutum (L.) Gaertn. seedling leaves under drought stress using transcriptome and proteome integrated analysis
Source: PeerJ journal article supplement (doi:10.7717/peerj.15165), 2023-04-03

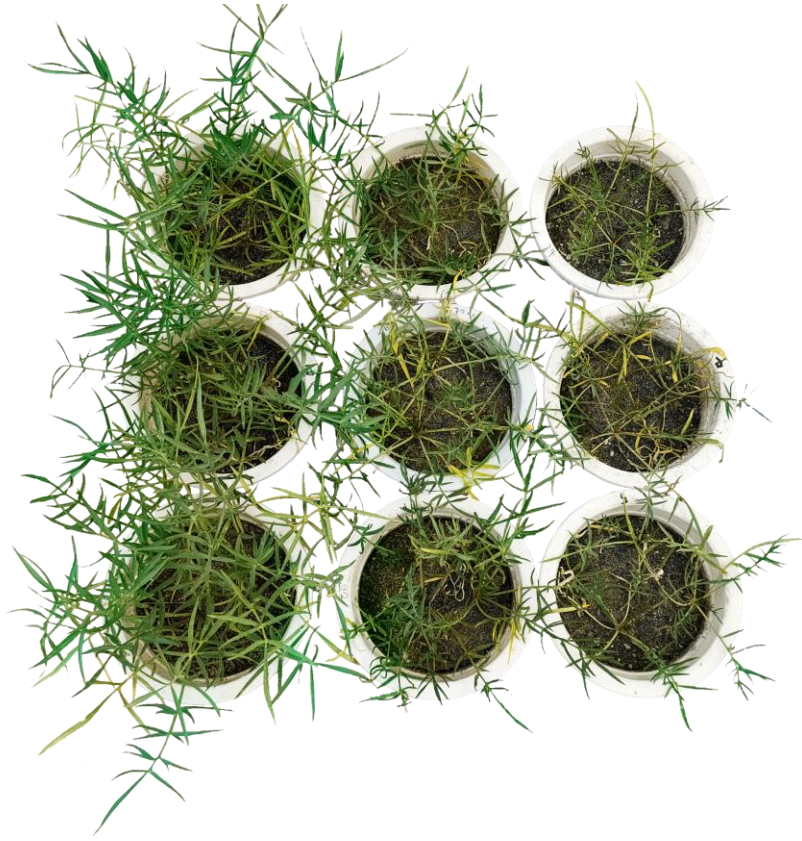

Supplement: RawDataFigure1A.pdf [file RawDataFigure1A.pdf]
