# Supplementary material for: Understanding the response in Pugionium cornutum (L.) Gaertn. seedling leaves under drought stress using transcriptome and proteome integrated analysis
Source: PeerJ. 2023 Apr 3;11:e15165. doi: 10.7717/peerj.15165 (PMC10078451; doi:10.7717/peerj.15165)
Supplement: Supplemental Information 1 [file peerj-11-15165-s001.xlsx]

## Sheet: Table. S1
Table.S1 DGs enriched KEGG pathways in drought stress
	Name	Map	p	q	Gene_in_DE	Up_Gene	Up_Count	Down_Gene	Down_Count
L2-L1	Plant hormone signal transduction	map04075	3.7029e-10	4.77674e-08	c47966_g1|K14486;c47966_g2|K14486;c50146_g1|K14496;c51975_g1|K14486;c44590_g2|K14497;c48520_g1|K14492;c45818_g1|K14488;c26255_g1|K14496;c40460_g1|K14509;c40592_g1|K14496;c42201_g1|K14489;c49753_g2|K14505;c74495_g1|K13464;c46274_g6|K14484;c52001_g4|K14517;c39496_g1|K14497;c50067_g4|K14508;c36034_g1|K14513;c39716_g2|K14513;c44391_g2|K14432;c42048_g1|K14498;c44218_g1|K14487;c45191_g1|K14497;c39143_g…	c47966_g1|K14486;c47966_g2|K14486;c50146_g1|K14496;c51975_g1|K14486;c44590_g2|K14497;c48520_g1|K14492;c26255_g1|K14496;c40460_g1|K14509;c40592_g1|K14496;c42201_g1|K14489;c49753_g2|K14505;c46274_g6|K14484;c39496_g1|K14497;c50067_g4|K14508;c36034_g1|K14513;c39716_g2|K14513;c44391_g2|K14432;c42048_g1|K14498;c44218_g1|K14487;c45191_g1|K14497;c39143_g1|K13449;c50129_g4|K14491;c41832_g2|K14484;c43809_g…	29	c45818_g1|K14488;c74495_g1|K13464;c52001_g4|K14517;c44276_g2|K14508	4
	Phenylpropanoid biosynthesis	map00940	1.64445e-09	1.06067e-07	c45037_g1|K00430;c52744_g2|K00430;c44945_g1|K00430;c42466_g1|K05350;c47117_g1|K00430;c50906_g3|K01188;c44715_g1|K00430;c46737_g1|K00487;c47880_g1|K00430;c40029_g1|K10775;c48398_g1|K00430;c1308_g1|K00430;c42343_g1|K01904;c45828_g1|K10775;c52385_g3|K00430;c49375_g1|K00430;c39461_g1|K00430;c45077_g1|K00430;c51087_g3|K01188;c46053_g2|K10775;c46053_g3|K10775;c52385_g1|K00430;c46072_g1|K00083;c51800_g3…	c45037_g1|K00430;c52744_g2|K00430;c44945_g1|K00430;c42466_g1|K05350;c50906_g3|K01188;c44715_g1|K00430;c46737_g1|K00487;c47880_g1|K00430;c40029_g1|K10775;c1308_g1|K00430;c42343_g1|K01904;c45828_g1|K10775;c52385_g3|K00430;c49375_g1|K00430;c39461_g1|K00430;c45077_g1|K00430;c51087_g3|K01188;c46053_g2|K10775;c46053_g3|K10775;c52385_g1|K00430;c46072_g1|K00083;c51800_g3|K00430	22	c47117_g1|K00430;c48398_g1|K00430;c40498_g1|K00430	3
	Phenylalanine metabolism	map00360	1.3288e-06	5.71386e-05	c45037_g1|K00430;c52744_g2|K00430;c44945_g1|K00430;c47117_g1|K00430;c44715_g1|K00430;c46737_g1|K00487;c52026_g3|K14455;c47880_g1|K00430;c40029_g1|K10775;c48398_g1|K00430;c1308_g1|K00430;c42343_g1|K01904;c42634_g1|K00815;c45828_g1|K10775;c52385_g3|K00430;c49375_g1|K00430;c39461_g1|K00430;c45077_g1|K00430;c46053_g2|K10775;c46053_g3|K10775;c52385_g1|K00430;c51800_g3|K00430;c40498_g1|K00430	c45037_g1|K00430;c52744_g2|K00430;c44945_g1|K00430;c44715_g1|K00430;c46737_g1|K00487;c52026_g3|K14455;c47880_g1|K00430;c40029_g1|K10775;c1308_g1|K00430;c42343_g1|K01904;c42634_g1|K00815;c45828_g1|K10775;c52385_g3|K00430;c49375_g1|K00430;c39461_g1|K00430;c45077_g1|K00430;c46053_g2|K10775;c46053_g3|K10775;c52385_g1|K00430;c51800_g3|K00430	20	c47117_g1|K00430;c48398_g1|K00430;c40498_g1|K00430	3
	Plant-pathogen interaction	map04626	7.2215e-06	0.000232893	c75359_g1|K13447;c46340_g1|K05391;c44700_g1|K13412;c50502_g5|K13447;c74495_g1|K13464;c30804_g1|K13447;c30804_g2|K13447;c38659_g1|K13412;c38659_g2|K13412;c42856_g1|K13448;c52152_g1|K13459;c43360_g1|K13420;c46535_g2|K13412;c50722_g1|K13420;c39143_g1|K13449;c43178_g1|K13430;c38219_g1|K05391;c30654_g1|K13448;c51114_g1|K13447;c44410_g1|K02183;c48057_g1|K02183;c48057_g2|K02183;c45168_g1|K13448	c75359_g1|K13447;c50502_g5|K13447;c30804_g1|K13447;c30804_g2|K13447;c50722_g1|K13420;c39143_g1|K13449;c38219_g1|K05391;c51114_g1|K13447	8	c46340_g1|K05391;c44700_g1|K13412;c74495_g1|K13464;c38659_g1|K13412;c38659_g2|K13412;c42856_g1|K13448;c52152_g1|K13459;c43360_g1|K13420;c46535_g2|K13412;c43178_g1|K13430;c30654_g1|K13448;c44410_g1|K02183;c48057_g1|K02183;c48057_g2|K02183;c45168_g1|K13448	15
	Galactose metabolism	map00052	0.000105708	0.00272726	c40573_g2|K00844;c48919_g1|K01835;c16523_g2|K00963;c41911_g2|K01190;c45589_g2|K00850;c48919_g2|K01835;c48919_g4|K01835;c49570_g1|K00850;c52396_g2|K06617;c45439_g1|K00850;c41543_g1|K01190;c52947_g1|K01190;c47539_g3|K00850	c40573_g2|K00844;c48919_g1|K01835;c16523_g2|K00963;c41911_g2|K01190;c45589_g2|K00850;c48919_g2|K01835;c48919_g4|K01835;c49570_g1|K00850;c52396_g2|K06617;c45439_g1|K00850;c41543_g1|K01190;c52947_g1|K01190	12	c47539_g3|K00850	1
	Phosphatidylinositol signaling system	map04070	0.000406179	0.00873285	c41269_g2|K00921;c42307_g2|K00921;c47765_g1|K05857;c47722_g2|K00981;c38356_g1|K00889;c52590_g2|K00921;c43959_g1|K00888;c52737_g1|K15422;c44410_g1|K02183;c35228_g1|K00889;c48057_g1|K02183;c48057_g2|K02183;c37041_g1|K00888	c41269_g2|K00921;c42307_g2|K00921;c47765_g1|K05857;c47722_g2|K00981;c38356_g1|K00889;c52590_g2|K00921;c43959_g1|K00888;c35228_g1|K00889;c37041_g1|K00888	9	c52737_g1|K15422;c44410_g1|K02183;c48057_g1|K02183;c48057_g2|K02183	4
	Cutin, suberine and wax biosynthesis	map00073	0.000532276	0.00980908	c43677_g1|K13356;c47945_g1|K15401;c51771_g1|K15400;c51002_g1|K15400;c49347_g2|K15406;c40220_g2|K13356;c40220_g1|K13356	c43677_g1|K13356;c47945_g1|K15401;c51771_g1|K15400;c51002_g1|K15400;c49347_g2|K15406;c40220_g2|K13356;c40220_g1|K13356	7	.	0
	Inositol phosphate metabolism	map00562	0.000913322	0.0147273	c41269_g2|K00921;c42307_g2|K00921;c50226_g2|K01858;c48247_g1|K01858;c47765_g1|K05857;c38356_g1|K00889;c49716_g1|K00469;c52590_g2|K00921;c49716_g3|K00469;c43959_g1|K00888;c52737_g1|K15422;c35228_g1|K00889;c37041_g1|K00888	c41269_g2|K00921;c42307_g2|K00921;c48247_g1|K01858;c47765_g1|K05857;c38356_g1|K00889;c49716_g1|K00469;c52590_g2|K00921;c49716_g3|K00469;c43959_g1|K00888;c35228_g1|K00889;c37041_g1|K00888	11	c50226_g2|K01858;c52737_g1|K15422	2
	Glucosinolate biosynthesis	map00966	0.0010838	0.0155344	c39087_g1|K12156;c39087_g2|K12156;c39087_g3|K12156;c40277_g2|K11813	c39087_g1|K12156;c39087_g2|K12156;c39087_g3|K12156	3	c40277_g2|K11813	1
	Zeatin biosynthesis	map00908	0.00277948	0.0358553	c30821_g1|K10760;c46152_g1|K00279;c48900_g1|K10717;c30497_g1|K10760	c30821_g1|K10760;c46152_g1|K00279;c48900_g1|K10717;c30497_g1|K10760	4	.	0
L3-L1	Plant-pathogen interaction	map04626	4.7948e-15	6.1853e-13	c36639_g1|K13458;c46340_g1|K05391;c45225_g1|K13464;c38489_g1|K13464;c52685_g1|K04079;c52431_g2|K13448;c44700_g1|K13412;c74495_g1|K13464;c41851_g1|K13448;c35626_g1|K04368;c38659_g1|K13412;c38659_g2|K13412;c43365_g1|K04079;c39838_g1|K13464;c35236_g1|K13464;c42856_g1|K13448;c42427_g1|K13464;c52152_g1|K13459;c46340_g2|K05391;c43360_g1|K13420;c46535_g2|K13412;c32396_g1|K13448;c43042_g1|K13464;c43042_g…	c36639_g1|K13458;c52685_g1|K04079;c43365_g1|K04079;c43365_g2|K04079	4	c46340_g1|K05391;c45225_g1|K13464;c38489_g1|K13464;c52431_g2|K13448;c44700_g1|K13412;c74495_g1|K13464;c41851_g1|K13448;c35626_g1|K04368;c38659_g1|K13412;c38659_g2|K13412;c39838_g1|K13464;c35236_g1|K13464;c42856_g1|K13448;c42427_g1|K13464;c52152_g1|K13459;c46340_g2|K05391;c43360_g1|K13420;c46535_g2|K13412;c32396_g1|K13448;c43042_g1|K13464;c43042_g2|K13464;c51878_g1|K13428;c41559_g1|K13448;c42824_g…	29
	Plant hormone signal transduction	map04075	2.01616e-12	1.30042e-10	c47966_g1|K14486;c47966_g2|K14486;c45225_g1|K13464;c38489_g1|K13464;c50146_g1|K14496;c45818_g1|K14488;c26255_g1|K14496;c40460_g1|K14509;c74495_g1|K13464;c37410_g1|K14491;c46274_g6|K14484;c47290_g2|K14494;c37918_g1|K14486;c52001_g4|K14517;c39838_g1|K13464;c40363_g1|K14496;c35236_g1|K13464;c42427_g1|K13464;c47028_g1|K14487;c44391_g2|K14432;c48715_g2|K14505;c49556_g1|K14493;c48704_g4|K14510;c43042_g…	c47966_g1|K14486;c47966_g2|K14486;c50146_g1|K14496;c26255_g1|K14496;c40460_g1|K14509;c37410_g1|K14491;c46274_g6|K14484;c47290_g2|K14494;c37918_g1|K14486;c40363_g1|K14496;c44391_g2|K14432;c46760_g3|K14496;c47893_g1|K14432;c35336_g1|K14431	14	c45225_g1|K13464;c38489_g1|K13464;c45818_g1|K14488;c74495_g1|K13464;c52001_g4|K14517;c39838_g1|K13464;c35236_g1|K13464;c42427_g1|K13464;c47028_g1|K14487;c48715_g2|K14505;c49556_g1|K14493;c48704_g4|K14510;c43042_g1|K13464;c43042_g2|K13464;c45895_g1|K14496;c42824_g3|K13464;c42427_g3|K13464;c42427_g2|K13464	18
	Glucosinolate biosynthesis	map00966	9.47004e-07	4.07212e-05	c42378_g1|K11818;c35850_g2|K11821;c40075_g2|K11820;c40277_g1|K11813;c40277_g2|K11813;c48697_g1|K11812	.	0	c42378_g1|K11818;c35850_g2|K11821;c40075_g2|K11820;c40277_g1|K11813;c40277_g2|K11813;c48697_g1|K11812	6
	Circadian rhythm - plant	map04712	2.0092e-06	6.47966e-05	c42346_g1|K12124;c45361_g2|K12133;c47836_g1|K12127;c50662_g4|K12127;c51988_g1|K12133;c47566_g1|K12130;c46086_g2|K03097;c44870_g2|K12125;c44870_g1|K12125;c22377_g1|K12130	c42346_g1|K12124;c45361_g2|K12133;c47836_g1|K12127;c50662_g4|K12127;c47566_g1|K12130;c46086_g2|K03097;c44870_g2|K12125;c44870_g1|K12125;c22377_g1|K12130	9	c51988_g1|K12133	1
	Protein processing in endoplasmic reticulum	map04141	5.90015e-05	0.00152224	c42546_g1|K13993;c49405_g3|K03283|K06758;c52685_g1|K04079;c44736_g1|K03283|K06758;c54558_g1|K10575;c43758_g2|K07953;c36433_g1|K10666;c43365_g1|K04079;c48111_g3|K13993;c47988_g2|K09518;c49280_g1|K13993;c35696_g2|K06689;c30518_g1|K13993;c44110_g2|K14011;c45601_g1|K13993;c37490_g1|K13993;c41814_g2|K13993;c40538_g1|K13993;c39154_g1|K13993;c46877_g1|K10666;c38153_g2|K13993;c38153_g1|K13993;c51939_g1|K…	c42546_g1|K13993;c49405_g3|K03283|K06758;c52685_g1|K04079;c36433_g1|K10666;c43365_g1|K04079;c48111_g3|K13993;c47988_g2|K09518;c49280_g1|K13993;c30518_g1|K13993;c45601_g1|K13993;c37490_g1|K13993;c41814_g2|K13993;c40538_g1|K13993;c39154_g1|K13993;c46877_g1|K10666;c38153_g2|K13993;c38153_g1|K13993;c51939_g1|K03283|K06758;c34098_g1|K10666;c45444_g1|K10666;c47731_g1|K10666;c44516_g1|K13993;c38048_g1|K…	26	c44736_g1|K03283|K06758;c54558_g1|K10575;c43758_g2|K07953;c35696_g2|K06689;c44110_g2|K14011;c52860_g1|K09580;c48338_g5|K09490	7
	Phenylpropanoid biosynthesis	map00940	7.35462e-05	0.00158124	c44279_g1|K00430;c46883_g1|K00430;c41212_g1|K00430;c46737_g1|K00487;c67199_g1|K00430;c34498_g1|K00430;c50081_g1|K00430;c48398_g1|K00430;c45828_g2|K10775;c48691_g1|K01188;c51087_g3|K01188;c40491_g1|K00430;c50915_g1|K00588;c46080_g1|K00430;c51317_g1|K01188	c46737_g1|K00487;c48691_g1|K01188;c51087_g3|K01188;c51317_g1|K01188	4	c44279_g1|K00430;c46883_g1|K00430;c41212_g1|K00430;c67199_g1|K00430;c34498_g1|K00430;c50081_g1|K00430;c48398_g1|K00430;c45828_g2|K10775;c40491_g1|K00430;c50915_g1|K00588;c46080_g1|K00430	11
	Other glycan degradation	map00511	0.000252524	0.00465366	c50359_g1|K12311;c46114_g1|K15923;c45432_g1|K12309;c37611_g1|K01206;c51858_g1|K17108;c52947_g1|K01190;c42448_g1|K12373	c50359_g1|K12311;c45432_g1|K12309;c52947_g1|K01190;c42448_g1|K12373	4	c46114_g1|K15923;c37611_g1|K01206;c51858_g1|K17108	3
	Amino sugar and nucleotide sugar metabolism	map00520	0.00311394	0.0446331	c51033_g1|K00012;c40198_g1|K02377;c47412_g1|K12448;c48643_g2|K08679;c16523_g1|K00963;c16523_g2|K00963;c42732_g1|K00844;c46412_g1|K00847;c51400_g3|K00326;c46875_g1|K08679;c47548_g1|K00012;c51959_g1|K12448;c52532_g1|K13648;c49836_g1|K00975;c19633_g1|K01183;c42448_g1|K12373	c16523_g1|K00963;c16523_g2|K00963;c42732_g1|K00844;c42448_g1|K12373	4	c51033_g1|K00012;c40198_g1|K02377;c47412_g1|K12448;c48643_g2|K08679;c46412_g1|K00847;c51400_g3|K00326;c46875_g1|K08679;c47548_g1|K00012;c51959_g1|K12448;c52532_g1|K13648;c49836_g1|K00975;c19633_g1|K01183	12
	Starch and sucrose metabolism	map00500	0.00383015	0.049409	c51033_g1|K00012;c48643_g2|K08679;c16523_g1|K00963;c16523_g2|K00963;c46302_g2|K00696;c52171_g1|K00705;c42732_g1|K00844;c46412_g1|K00847;c46875_g1|K08679;c48691_g1|K01188;c47548_g1|K00012;c42889_g1|K01087;c51087_g3|K01188;c52532_g1|K13648;c49836_g1|K00975;c38568_g1|K01513;c51317_g1|K01188	c16523_g1|K00963;c16523_g2|K00963;c46302_g2|K00696;c52171_g1|K00705;c42732_g1|K00844;c48691_g1|K01188;c51087_g3|K01188;c51317_g1|K01188	8	c51033_g1|K00012;c48643_g2|K08679;c46412_g1|K00847;c46875_g1|K08679;c47548_g1|K00012;c42889_g1|K01087;c52532_g1|K13648;c49836_g1|K00975;c38568_g1|K01513	9
