# Supplementary material for: Understanding the response in Pugionium cornutum (L.) Gaertn. seedling leaves under drought stress using transcriptome and proteome integrated analysis
Source: PeerJ. 2023 Apr 3;11:e15165. doi: 10.7717/peerj.15165 (PMC10078451; doi:10.7717/peerj.15165)
Supplement: Supplemental Information 2 [file peerj-11-15165-s002.xlsx]

## Sheet: Table. S2
Table.S2 DPs enriched KEGG pathways in drought stress
L2-L1			L3-L1
Map_ID	Map_Name	P value	Map_ID	Map_Name	P value
map00010	Glycolysis / Gluconeogenesis	0.135211	map00010	Glycolysis / Gluconeogenesis	0.727975
map00020	Citrate cycle (TCA cycle)	0.28506	map00020	Citrate cycle (TCA cycle)	0.447366
map00030	Pentose phosphate pathway	0.335361	map00030	Pentose phosphate pathway	0.919817
map00040	Pentose and glucuronate interconversions	0.372027	map00040	Pentose and glucuronate interconversions	0.587741
map00051	Fructose and mannose metabolism	0.773919	map00051	Fructose and mannose metabolism	0.467087
map00052	Galactose metabolism	0.80429	map00052	Galactose metabolism	0.0668319
map00053	Ascorbate and aldarate metabolism	0.387282	map00053	Ascorbate and aldarate metabolism	0.0665925
map00061	Fatty acid biosynthesis	0.508253	map00061	Fatty acid biosynthesis	0.189065
map00062	Fatty acid elongation	0.457031	map00062	Fatty acid elongation	0.408648
map00071	Fatty acid degradation	0.62382	map00071	Fatty acid degradation	0.00640666
map00073	Cutin, suberine and wax biosynthesis	0.224556	map00072	Synthesis and degradation of ketone bodies	0.386237
map00190	Oxidative phosphorylation	0.998924	map00073	Cutin, suberine and wax biosynthesis	0.456776
map00195	Photosynthesis	0.72661	map00100	Steroid biosynthesis	0.0542991
map00196	Photosynthesis - antenna proteins	0.656817	map00130	Ubiquinone and other terpenoid-quinone biosynthesis	0.407947
map00220	Arginine biosynthesis	0.182207	map00190	Oxidative phosphorylation	0.999987
map00230	Purine metabolism	0.980532	map00195	Photosynthesis	0.875679
map00240	Pyrimidine metabolism	0.855991	map00196	Photosynthesis - antenna proteins	0.713131
map00250	Alanine, aspartate and glutamate metabolism	0.542495	map00220	Arginine biosynthesis	0.776008
map00260	Glycine, serine and threonine metabolism	0.384219	map00230	Purine metabolism	0.950737
map00261	Monobactam biosynthesis	0.42521	map00240	Pyrimidine metabolism	0.649759
map00270	Cysteine and methionine metabolism	0.926128	map00250	Alanine, aspartate and glutamate metabolism	0.799629
map00280	Valine, leucine and isoleucine degradation	0.0419361	map00260	Glycine, serine and threonine metabolism	0.610052
map00290	Valine, leucine and isoleucine biosynthesis	0.00679079	map00261	Monobactam biosynthesis	0.107612
map00310	Lysine degradation	0.242207	map00270	Cysteine and methionine metabolism	0.764178
map00330	Arginine and proline metabolism	0.0855159	map00280	Valine, leucine and isoleucine degradation	0.287405
map00340	Histidine metabolism	0.205006	map00290	Valine, leucine and isoleucine biosynthesis	0.0591512
map00350	Tyrosine metabolism	0.747341	map00300	Lysine biosynthesis	0.102423
map00360	Phenylalanine metabolism	0.771873	map00310	Lysine degradation	0.0583798
map00380	Tryptophan metabolism	0.372027	map00330	Arginine and proline metabolism	0.189065
map00400	Phenylalanine, tyrosine and tryptophan biosynthesis	0.0343803	map00340	Histidine metabolism	0.309278
map00410	beta-Alanine metabolism	0.335496	map00350	Tyrosine metabolism	0.191603
map00460	Cyanoamino acid metabolism	0.814041	map00360	Phenylalanine metabolism	0.23474
map00480	Glutathione metabolism	0.344259	map00380	Tryptophan metabolism	0.0697485
map00500	Starch and sucrose metabolism	0.595359	map00400	Phenylalanine, tyrosine and tryptophan biosynthesis	0.000139474
map00520	Amino sugar and nucleotide sugar metabolism	0.623621	map00410	beta-Alanine metabolism	0.531602
map00561	Glycerolipid metabolism	0.04744	map00450	Selenocompound metabolism	0.713131
map00590	Arachidonic acid metabolism	0.483999	map00460	Cyanoamino acid metabolism	0.171162
map00592	alpha-Linolenic acid metabolism	0.372027	map00480	Glutathione metabolism	0.28041
map00620	Pyruvate metabolism	0.190804	map00500	Starch and sucrose metabolism	0.0489726
map00630	Glyoxylate and dicarboxylate metabolism	0.33591	map00510	N-Glycan biosynthesis	0.889106
map00640	Propanoate metabolism	0.135753	map00520	Amino sugar and nucleotide sugar metabolism	0.000200717
map00660	C5-Branched dibasic acid metabolism	0.00148234	map00561	Glycerolipid metabolism	0.035062
map00670	One carbon pool by folate	0.475962	map00564	Glycerophospholipid metabolism	0.457633
map00710	Carbon fixation in photosynthetic organisms	0.344066	map00565	Ether lipid metabolism	0.45006
map00740	Riboflavin metabolism	0.398807	map00592	alpha-Linolenic acid metabolism	0.171189
map00760	Nicotinate and nicotinamide metabolism	0.224556	map00600	Sphingolipid metabolism	0.0370354
map00770	Pantothenate and CoA biosynthesis	0.656817	map00603	Glycosphingolipid biosynthesis - globo and isoglobo series	0.104082
map00790	Folate biosynthesis	0.457031	map00620	Pyruvate metabolism	0.77811
map00860	Porphyrin and chlorophyll metabolism	0.0164386	map00630	Glyoxylate and dicarboxylate metabolism	0.959237
map00900	Terpenoid backbone biosynthesis	0.0422521	map00640	Propanoate metabolism	0.171189
map00901	Indole alkaloid biosynthesis	0.0495766	map00650	Butanoate metabolism	0.629323
map00908	Zeatin biosynthesis	0.205006	map00660	C5-Branched dibasic acid metabolism	0.0294014
map00910	Nitrogen metabolism	0.492269	map00670	One carbon pool by folate	0.896723
map00920	Sulfur metabolism	0.832113	map00710	Carbon fixation in photosynthetic organisms	0.999505
map00940	Phenylpropanoid biosynthesis	0.790475	map00730	Thiamine metabolism	0.705055
map00944	Flavone and flavonol biosynthesis	0.18408	map00740	Riboflavin metabolism	0.705055
map00950	Isoquinoline alkaloid biosynthesis	0.557152	map00770	Pantothenate and CoA biosynthesis	0.923184
map00960	Tropane, piperidine and pyridine alkaloid biosynthesis	0.690109	map00790	Folate biosynthesis	0.769015
map00966	Glucosinolate biosynthesis	0.0152884	map00860	Porphyrin and chlorophyll metabolism	3.4525e-05
map01040	Biosynthesis of unsaturated fatty acids	0.619961	map00900	Terpenoid backbone biosynthesis	0.0290797
map01200	Carbon metabolism	0.393941	map00901	Indole alkaloid biosynthesis	0.114858
map01210	2-Oxocarboxylic acid metabolism	0.0587823	map00908	Zeatin biosynthesis	0.122363
map01212	Fatty acid metabolism	0.798346	map00910	Nitrogen metabolism	0.747855
map01230	Biosynthesis of amino acids	0.168321	map00920	Sulfur metabolism	0.783258
map02010	ABC transporters	0.263029	map00940	Phenylpropanoid biosynthesis	0.50545
map03010	Ribosome	0.998922	map00944	Flavone and flavonol biosynthesis	0.0674993
map03013	RNA transport	0.919723	map00950	Isoquinoline alkaloid biosynthesis	0.276293
map03030	DNA replication	0.33436	map00960	Tropane, piperidine and pyridine alkaloid biosynthesis	0.115759
map03040	Spliceosome	0.676283	map00966	Glucosinolate biosynthesis	2.36544e-05
map03060	Protein export	0.80429	map00970	Aminoacyl-tRNA biosynthesis	0.998488
map03420	Nucleotide excision repair	0.457031	map01040	Biosynthesis of unsaturated fatty acids	0.375335
map03430	Mismatch repair	0.33436	map01200	Carbon metabolism	0.977407
map03440	Homologous recombination	0.224556	map01210	2-Oxocarboxylic acid metabolism	0.0151009
map04016	MAPK signaling pathway - plant	0.734106	map01212	Fatty acid metabolism	0.133454
map04075	Plant hormone signal transduction	0.557152	map01230	Biosynthesis of amino acids	0.343807
map04141	Protein processing in endoplasmic reticulum	1.04283e-06	map02010	ABC transporters	0.0231094
map04144	Endocytosis	0.700522	map03010	Ribosome	1
map04145	Phagosome	0.790475	map03013	RNA transport	0.966595
map04146	Peroxisome	0.577696	map03015	mRNA surveillance pathway	0.995426
map04626	Plant-pathogen interaction	0.150735	map03018	RNA degradation	0.744088
			map03030	DNA replication	0.623416
			map03040	Spliceosome	0.844554
			map03050	Proteasome	0.997812
			map03060	Protein export	0.896723
			map03420	Nucleotide excision repair	0.769015
			map03430	Mismatch repair	0.623416
			map03440	Homologous recombination	0.456776
			map04016	MAPK signaling pathway - plant	0.349164
			map04075	Plant hormone signal transduction	0.563538
			map04120	Ubiquitin mediated proteolysis	0.97117
			map04122	Sulfur relay system	0.519217
			map04141	Protein processing in endoplasmic reticulum	0.000335707
			map04144	Endocytosis	0.735655
			map04145	Phagosome	0.347369
			map04146	Peroxisome	0.144702
			map04626	Plant-pathogen interaction	0.486371
