# Supplementary material for: Understanding the response in Pugionium cornutum (L.) Gaertn. seedling leaves under drought stress using transcriptome and proteome integrated analysis
Source: PeerJ. 2023 Apr 3;11:e15165. doi: 10.7717/peerj.15165 (PMC10078451; doi:10.7717/peerj.15165)
Supplement: Supplemental Information 3 [file peerj-11-15165-s003.xlsx]

## Sheet: Table. S3
Table S3 Common significantly different proteins or genes in drought stress
Accession	up/down	Description
L2-L1
Proteins or genes that differ in same trends
c30518_g1	up	26.5 kDa heat shock protein
c34946_g2	up	22.0 kDa heat shock protein
c40538_g1	up	22.0 kDa heat shock protein
c40986_g1	up	Cysteine proteinase RD21a
c41814_g2	up	18.1 kDa class I heat shock protein
c42292_g1	up	DEAD-box ATP-dependent RNA helicase 52
c42546_g1	up	15.7 kDa heat shock protein
c42671_g1	up	Hevein-like protein
c44697_g1	up	Non-specific lipid-transfer protein-like protein At2g13820
c46714_g1	up	L-ascorbate peroxidase 2
c48759_g1	up	Aldehyde dehydrogenase family 7 member B4
c49177_g2	up	.
c49280_g1	up	25.3 kDa heat shock protein
c50495_g1	up	Alpha-aminoadipic semialdehyde synthase
c51797_g7	up	Ubiquitin-60S ribosomal protein L40
c30654_g1	down	Calcium-binding protein CML42
c36028_g1	down	Cytochrome P450 77A4
c41098_g1	down	Probable methyltransferase PMT21
c42267_g1	down	S-adenosylmethionine synthase 2
c44830_g1	down	.
c45568_g2	down	Uncharacterized protein At5g22580
c48106_g1	down	Probable mitochondrial chaperone BCS1-A
c49679_g1	down	Probable mitochondrial chaperone bcs1
c50989_g1	down	Probable LRR receptor-like serine/threonine-protein kinase At1g51820
Proteins or genes that differ in opposite trends
c39489_g1	-	Thioredoxin H5
c34884_g1	-	Tubulin beta-8 chain
c38633_g2	-	.
c44576_g1	-	Early nodulin-like protein 1
c44977_g1	-	D-alanine--D-alanine ligase
c50427_g1	-	Early nodulin-like protein 3
L3-L1
Proteins or genes that differ in some trends
c30518_g1	up	26.5 kDa heat shock protein
c34881_g1	up	Dehydrin ERD10
c34946_g2	up	22.0 kDa heat shock protein
c35214_g2	up	Formate dehydrogenase
c35631_g1	up	Chaperone protein ClpB1
c36056_g1	up	.
c39154_g1	up	23.6 kDa heat shock protein
c39198_g1	up	.
c39900_g2	up	Membrane steroid-binding protein 1
c40141_g1	up	Endochitinase CH25
c40538_g1	up	22.0 kDa heat shock protein
c40645_g1	up	Stem-specific protein TSJT1
c40986_g1	up	Cysteine proteinase RD21a
c41382_g2	up	Beta-galactosidase 4
c41814_g2	up	Glutathione S-transferase U4
c42277_g1	up	BAG family molecular chaperone regulator 6
c42546_g1	up	15.7 kDa heat shock protein
c42915_g1	up	Galactinol synthase 1
c43365_g2	up	Heat shock protein 90-1
c44791_g1	up	.
c46714_g1	up	L-ascorbate peroxidase 2
c46943_g4	up	Calcyclin-binding protein
c47021_g1	up	BI1-like protein
c47205_g6	up	Probable acyl-activating enzyme 5
c49076_g1	up	Hsp70 nucleotide exchange factor fes1
c49177_g2	up	.
c49280_g1	up	25.3 kDa heat shock protein
c50047_g2	up	DnaJ homolog subfamily B member 6-A
c50535_g1	up	Zinc finger protein ZPR1 homolog
c50658_g1	up	Xylose isomerase
c50801_g2	up	Peptidyl-prolyl cis-trans isomerase FKBP65
c51002_g1	up	Omega-hydroxypalmitate O-feruloyl transferase
c51439_g1	up	Heat shock 70 kDa protein 8
c51939_g1	up	Heat shock 70 kDa protein 5
c52006_g1	up	Cysteine proteinase RD21a
c52809_g1	up	Beta-galactosidase 1
c52926_g1	up	.
c22565_g1	down	Protein HOTHEAD
c32933_g1	down	.
c34498_g1	down	Peroxidase 31
c35850_g2	down	Cytosolic sulfotransferase 16
c37689_g1	down	5-methyltetrahydropteroyltriglutamate--homocysteine methyltransferase
c38101_g1	down	Probable mitochondrial chaperone BCS1-B
c41062_g1	down	GDSL esterase/lipase At1g33811
c41098_g1	down	Probable methyltransferase PMT21
c42267_g1	down	S-adenosylmethionine synthase 2
c42378_g1	down	Cytochrome P450 83B1
c42865_g1	down	Endoglucanase 6
c43081_g1	down	Probable xyloglucan endotransglucosylase/hydrolase protein 32
c43083_g2	down	Stress-associated endoplasmic reticulum protein 2
c43366_g1	down	Glucan endo-1,3-beta-glucosidase-like protein 2
c46278_g1	down	PI-PLC X domain-containing protein At5g67130
c46875_g1	down	UDP-glucuronate 4-epimerase 6
c47179_g1	down	Adenosine kinase 2
c47548_g1	down	Probable UDP-glucose 6-dehydrogenase 1
c48556_g2	down	Probable methyltransferase PMT24
c50228_g1	down	Adenylyl-sulfate kinase 2
c50915_g1	down	Caffeoyl-CoA O-methyltransferase 1
c50989_g1	down	Probable LRR receptor-like serine/threonine-protein kinase At1g51820
c52102_g2	down	Fasciclin-like arabinogalactan protein 16
c52584_g1	down	Probable methyltransferase PMT8
Proteins or genes that differ in opposite trends
c46235_g1	-	LRR receptor-like serine/threonine-protein kinase GSO2
c34401_g1	-	1-aminocyclopropane-1-carboxylate oxidase 5
c34884_g1	-	Tubulin beta-8 chain
c38031_g1	-	Subtilisin-like protease
c39303_g1	-	.
c42807_g1	-	Phosphatidylserine decarboxylase proenzyme 3
c44571_g1	-	Beta-galactosidase 5
c52171_g1	-	4-alpha-glucanotransferase DPE1
c52963_g2	-	Protein MOR1
