# Supplementary material for: Understanding the response in Pugionium cornutum (L.) Gaertn. seedling leaves under drought stress using transcriptome and proteome integrated analysis
Source: PeerJ. 2023 Apr 3;11:e15165. doi: 10.7717/peerj.15165 (PMC10078451; doi:10.7717/peerj.15165)
Supplement: Supplemental Information 4 [file peerj-11-15165-s004.xlsx]

## Sheet: Table. S4
Table.S4 primer sequences of qPCR
Protein name	Primer Sequence
β-actin	F：CATCCCTTGGAGGATCAAGTATT
	R：CCTCTTGTTGCTTTCGGTTTC
c41814_g2	F: GTCTCCTTCCAATCCACTCTTG
	R: TCTTCACGCCTCTAGCAAAC
A0A0D3B7Y7	F: GGTTTCCAGATCCGTTCAGG
	R: CTTCATCCCTGGAACATCGAG
A0A078HNN8	F: CGACTGTTACAAGCTTAGGTACG
	R: CTTCTTCAGGTGATCCTTCTTCT
E4MYB4	F: ATTGATGGTCTCTGGATCTGC
	R: GTGATCGTTGACTTAAGAACACTTG
D7M4F3	F: GCTGATGGTTGAAGTGGTTG
	R: TTACAGGAAAGAAGTACCCGC
V4MA11	F: CGACATAAACTCTCTCGACTCTC
	R: TGGCCTGTTGATACGTATGTG
R0I205	F: AGGTCAAGCGGTCAATTCTC
	R: CTTCATCTCTACCTTAGGCACC
