# Supplementary material for: Understanding the response in Pugionium cornutum (L.) Gaertn. seedling leaves under drought stress using transcriptome and proteome integrated analysis
Source: PeerJ. 2023 Apr 3;11:e15165. doi: 10.7717/peerj.15165 (PMC10078451; doi:10.7717/peerj.15165)
Supplement: Supplemental Information 5 [file peerj-11-15165-s005.xlsx]

## Sheet: Table. S5
Table. S5 DGs annotation in drought stress
L2-L1
gene	FoldChange	log2FoldChange	pval	padj	up/down	significant	NT_Seq-ID	NT_Score	NT_Evalue	NT_Description	NR_Seq-ID	NR_Score	NR_Evalue	NR_Description	BLASTX_ID	BLASTX_Score	BLASTX_Evalue	BLASTX_Description	BLASTP_ID	BLASTP_Score	BLASTP_Evalue	BLASTP_Description	PFAM_ID	PFAM_Name	PFAM_Description	eggNOG_ID	eggNOG_Description	RNAMMER	Prot_ID	Prot_Coords	SignalP	TmHMM	GO_biological_process	GO_molecular_function	GO_cellular_component	KO	Map
c40460_g1	4.65604	2.2191	0.00039478	0.00873187	up	yes	gi|567195694|ref|XM_006406011.1|	1414	0	Eutrema salsugineum hypothetical protein (EUTSA_v10020114mg) mRNA, complete cds	gi|567195695|ref|XP_006406074.1|	3414	0	hypothetical protein EUTSA_v10020114mg [Eutrema salsugineum]	sp|Q0WPQ2|ETR2_ARATH	1235	E:0	RecName: Full=Ethylene receptor 2;^Eukaryota; Viridiplantae; Streptophyta; Embryophyta; Tracheophyta; Spermatophyta; Magnoliophyta; eudicotyledons; core eudicotyledons; rosids; malvids; Brassicales; Brassicaceae; Camelineae; Arabidopsis	sp|Q0WPQ2|ETR2_ARATH	1276	E:0	RecName: Full=Ethylene receptor 2;^Eukaryota; Viridiplantae; Streptophyta; Embryophyta; Tracheophyta; Spermatophyta; Magnoliophyta; eudicotyledons; core eudicotyledons; rosids; malvids; Brassicales; Brassicaceae; Camelineae; Arabidopsis	PF01590.21	GAF	GAF domain	COG0784	FOG: CheY-like receiver	.	c40460_g1|m.47108	145-2457[-]	sigP:1^23^0.788^YES	ExpAA=84.79^PredHel=4^Topology=o4-26i54-71o81-103i116-138o	GO:0009873|ethylene mediated signaling pathway;GO:0035556|intracellular signal transduction;GO:0010105|negative regulation of ethylene mediated signaling pathway;GO:0006355|regulation of transcription, DNA-dependent;GO:0023014|signal transduction by phosphorylation	GO:0005524|ATP binding;GO:0051740|ethylene binding;GO:0046872|metal ion binding;GO:0000156|phosphorelay response regulator activity;GO:0000155|phosphorelay sensor kinase activity;GO:0004674|protein serine/threonine kinase activity;GO:0004872|receptor activity	GO:0005783|endoplasmic reticulum;GO:0005789|endoplasmic reticulum membrane;GO:0016021|integral to membrane	K14509|ETR, ERS; ethylene receptor [EC:2.7.13.-]	map04075|Plant hormone signal transduction
c50389_g2	0.481957	-1.05302	0.000782725	0.0134188	down	yes	gi|335354994|gb|JF920287.1|	2457	0	Brassica carinata mitochondrion, complete genome	gi|357435985|ref|XP_003588268.1|	1002	3e-123	NADH-ubiquinone oxidoreductase chain [Medicago truncatula]	sp|P93313|NU4M_ARATH	312	E:3e-92	RecName: Full=NADH-ubiquinone oxidoreductase chain 4;^Eukaryota; Viridiplantae; Streptophyta; Embryophyta; Tracheophyta; Spermatophyta; Magnoliophyta; eudicotyledons; core eudicotyledons; rosids; malvids; Brassicales; Brassicaceae; Camelineae; Arabidopsis	sp|P93313|NU4M_ARATH	282	E:1e-91	RecName: Full=NADH-ubiquinone oxidoreductase chain 4;^Eukaryota; Viridiplantae; Streptophyta; Embryophyta; Tracheophyta; Spermatophyta; Magnoliophyta; eudicotyledons; core eudicotyledons; rosids; malvids; Brassicales; Brassicaceae; Camelineae; Arabidopsis	PF00361.15	Oxidored_q1	NADH-Ubiquinone/plastoquinone (complex I), various chains	COG1008	NADH:ubiquinone oxidoreductase subunit 4 (chain M)	.	c50389_g2|m.47397	2463-2978[-]	sigP:1^17^0.563^YES	ExpAA=85.80^PredHel=4^Topology=i31-53o63-85i92-114o124-146i	GO:0006120|mitochondrial electron transport, NADH to ubiquinone	GO:0008137|NADH dehydrogenase (ubiquinone) activity	GO:0016021|integral to membrane;GO:0005743|mitochondrial inner membrane;GO:0070469|respiratory chain	K03881|ND4; NADH-ubiquinone oxidoreductase chain 4 [EC:1.6.5.3]	map01100|Metabolic pathways;map00190|Oxidative phosphorylation;map05012|Parkinson's disease
c47769_g1	6.07599	2.60312	8.66166e-11	1.25672e-07	up	yes	gi|567216153|ref|XM_006411643.1|	369	0	Eutrema salsugineum hypothetical protein (EUTSA_v10025494mg) mRNA, complete cds	gi|567216154|ref|XP_006411706.1|	720	5e-88	hypothetical protein EUTSA_v10025494mg [Eutrema salsugineum]	sp|P43296|RD19A_ARATH	268	E:6e-84	RecName: Full=Cysteine proteinase RD19a;^Eukaryota; Viridiplantae; Streptophyta; Embryophyta; Tracheophyta; Spermatophyta; Magnoliophyta; eudicotyledons; core eudicotyledons; rosids; malvids; Brassicales; Brassicaceae; Camelineae; Arabidopsis	sp|P43296|RD19A_ARATH	276	E:7e-91	RecName: Full=Cysteine proteinase RD19a;^Eukaryota; Viridiplantae; Streptophyta; Embryophyta; Tracheophyta; Spermatophyta; Magnoliophyta; eudicotyledons; core eudicotyledons; rosids; malvids; Brassicales; Brassicaceae; Camelineae; Arabidopsis	PF08246.7	Inhibitor_I29	Cathepsin propeptide inhibitor domain (I29)	COG4870	Cysteine protease	.	c47769_g1|m.64980	1-522[-]	sigP:1^23^0.869^YES	ExpAA=19.99^PredHel=1^Topology=i7-26o	GO:0042742|defense response to bacterium;GO:0006508|proteolysis;GO:0009651|response to salt stress	GO:0004197|cysteine-type endopeptidase activity	GO:0005634|nucleus;GO:0005773|vacuole	K01373|CTSF; cathepsin F [EC:3.4.22.41]	map04142|Lysosome
c47945_g1	79.4825	6.31257	1.2238e-10	1.48183e-07	up	yes	gi|567177482|ref|XM_006400968.1|	1167	0	Eutrema salsugineum hypothetical protein (EUTSA_v10013214mg) mRNA, complete cds	gi|567177483|ref|XP_006401031.1|	2631	0	hypothetical protein EUTSA_v10013214mg [Eutrema salsugineum]	sp|P48422|C86A1_ARATH	992	E:0	RecName: Full=Cytochrome P450 86A1;^Eukaryota; Viridiplantae; Streptophyta; Embryophyta; Tracheophyta; Spermatophyta; Magnoliophyta; eudicotyledons; core eudicotyledons; rosids; malvids; Brassicales; Brassicaceae; Camelineae; Arabidopsis	sp|P48422|C86A1_ARATH	989	E:0	RecName: Full=Cytochrome P450 86A1;^Eukaryota; Viridiplantae; Streptophyta; Embryophyta; Tracheophyta; Spermatophyta; Magnoliophyta; eudicotyledons; core eudicotyledons; rosids; malvids; Brassicales; Brassicaceae; Camelineae; Arabidopsis	PF00067.17	p450	Cytochrome P450	COG2124	Cytochrome P450	.	c47945_g1|m.908	3-1556[+]	.	ExpAA=22.88^PredHel=1^Topology=i12-34o	GO:0006631|fatty acid metabolic process;GO:0010345|suberin biosynthetic process	GO:0018685|alkane 1-monooxygenase activity;GO:0009055|electron carrier activity;GO:0020037|heme binding;GO:0005506|iron ion binding	GO:0016021|integral to membrane;GO:0005773|vacuole	K15401|CYP86A1; fatty acid omega-hydroxylase [EC:1.14.-.-]	map00073|Cutin, suberine and wax biosynthesis
c50359_g1	5.40265	2.43367	5.37327e-05	0.00229651	up	yes	gi|567142065|ref|XM_006395468.1|	337	1e-175	Eutrema salsugineum hypothetical protein (EUTSA_v10003577mg) mRNA, complete cds	gi|567142066|ref|XP_006395530.1|	722	4e-86	hypothetical protein EUTSA_v10003577mg [Eutrema salsugineum]	sp|Q29451|MA2B1_BOVIN	160	E:1e-43	RecName: Full=Lysosomal alpha-mannosidase;^Eukaryota; Metazoa; Chordata; Craniata; Vertebrata; Euteleostomi; Mammalia; Eutheria; Laurasiatheria; Cetartiodactyla; Ruminantia; Pecora; Bovidae; Bovinae; Bos	sp|Q29451|MA2B1_BOVIN	160	E:2e-44	RecName: Full=Lysosomal alpha-mannosidase;^Eukaryota; Metazoa; Chordata; Craniata; Vertebrata; Euteleostomi; Mammalia; Eutheria; Laurasiatheria; Cetartiodactyla; Ruminantia; Pecora; Bovidae; Bovinae; Bos	PF01074.17	Glyco_hydro_38	Glycosyl hydrolases family 38 N-terminal domain	COG0383	Alpha-mannosidase	.	c50359_g1|m.1459	1-462[-]	.	ExpAA=22.03^PredHel=1^Topology=i7-29o	GO:0006013|mannose metabolic process	GO:0004559|alpha-mannosidase activity;GO:0030246|carbohydrate binding;GO:0046872|metal ion binding;GO:0008270|zinc ion binding	GO:0005764|lysosome	K12311|MAN2B1, LAMAN; lysosomal alpha-mannosidase [EC:3.2.1.24]	map04142|Lysosome;map00511|Other glycan degradation
c49561_g5	8.86001	3.14731	0.000154436	0.00471989	up	yes	gi|567178093|ref|XM_006401138.1|	1031	0	Eutrema salsugineum hypothetical protein (EUTSA_v10013277mg) mRNA, complete cds	gi|567178094|ref|XP_006401201.1|	2343	0	hypothetical protein EUTSA_v10013277mg [Eutrema salsugineum]	sp|Q54DY9|BCS1B_DICDI	125	E:3e-29	RecName: Full=Probable mitochondrial chaperone BCS1-B;^Eukaryota; Amoebozoa; Mycetozoa; Dictyosteliida; Dictyostelium	sp|Q54DY9|BCS1B_DICDI	135	E:2e-33	RecName: Full=Probable mitochondrial chaperone BCS1-B;^Eukaryota; Amoebozoa; Mycetozoa; Dictyosteliida; Dictyostelium	PF14363.1	AAA_assoc	Domain associated at C-terminal with AAA	COG0465	ATP-dependent Zn proteases	.	c49561_g5|m.3561	244-1815[-]	sigP:1^24^0.572^YES	ExpAA=19.06^PredHel=1^Topology=i5-27o	GO:0051131|chaperone-mediated protein complex assembly	GO:0005524|ATP binding;GO:0016887|ATPase activity	GO:0016021|integral to membrane;GO:0005743|mitochondrial inner membrane;GO:0005739|mitochondrion	K08900|BCS1; mitochondrial chaperone BCS1	.
c49072_g3	2.58038	1.36758	0.00566717	0.0487295	up	yes	gi|297843045|ref|XM_002889358.1|	1472	0	Arabidopsis lyrata subsp. lyrata P-glycoprotein 12 (PGP12), mRNA	gi|727429681|ref|XP_010481058.1|	3302	0	PREDICTED: ABC transporter B family member 11-like isoform X1 [Camelina sativa]	sp|Q9FWX7|AB11B_ARATH	1265	E:0	RecName: Full=ABC transporter B family member 11;^Eukaryota; Viridiplantae; Streptophyta; Embryophyta; Tracheophyta; Spermatophyta; Magnoliophyta; eudicotyledons; core eudicotyledons; rosids; malvids; Brassicales; Brassicaceae; Camelineae; Arabidopsis`sp|Q9FWX7|AB11B_ARATH	sp|Q9FWX7|AB11B_ARATH	1408	E:0	RecName: Full=ABC transporter B family member 11;^Eukaryota; Viridiplantae; Streptophyta; Embryophyta; Tracheophyta; Spermatophyta; Magnoliophyta; eudicotyledons; core eudicotyledons; rosids; malvids; Brassicales; Brassicaceae; Camelineae; Arabidopsis`sp|Q9FWX7|AB11B_ARATH	PF00005.22	ABC_tran	ABC transporter	COG1132	ABC-type multidrug transport system, ATPase and permease components	.	c49072_g3|m.3991	189-2468[-]	.	ExpAA=108.57^PredHel=4^Topology=o190-212i233-255o326-348i414-436o	GO:0006200|ATP catabolic process	GO:0005524|ATP binding;GO:0042626|ATPase activity, coupled to transmembrane movement of substances	GO:0016021|integral to membrane;GO:0005886|plasma membrane;GO:0009506|plasmodesma	K05658|ABCB1; ATP-binding cassette, subfamily B (MDR/TAP), member 1 [EC:3.6.3.44]	map02010|ABC transporters;map05206|MicroRNAs in cancer;map04976|Bile secretion
c42456_g3	5.72779	2.51798	0.00409632	0.0392367	up	yes	gi|567220721|ref|XM_006413927.1|	238	1e-120	Eutrema salsugineum hypothetical protein (EUTSA_v10025059mg) mRNA, complete cds	gi|567220718|ref|XP_006413988.1|	511	1e-59	hypothetical protein EUTSA_v10025059mg [Eutrema salsugineum]	sp|Q949P1|ABAH1_ARATH	197	E:2e-59	RecName: Full=Abscisic acid 8'-hydroxylase 1;^Eukaryota; Viridiplantae; Streptophyta; Embryophyta; Tracheophyta; Spermatophyta; Magnoliophyta; eudicotyledons; core eudicotyledons; rosids; malvids; Brassicales; Brassicaceae; Camelineae; Arabidopsis`sp|Q949P1|ABAH1_ARATH	sp|Q949P1|ABAH1_ARATH	197	E:1e-59	RecName: Full=Abscisic acid 8'-hydroxylase 1;^Eukaryota; Viridiplantae; Streptophyta; Embryophyta; Tracheophyta; Spermatophyta; Magnoliophyta; eudicotyledons; core eudicotyledons; rosids; malvids; Brassicales; Brassicaceae; Camelineae; Arabidopsis	PF00067.17	p450	Cytochrome P450	COG2124	Cytochrome P450	.	c42456_g3|m.4933	9-506[-]	.	ExpAA=21.99^PredHel=1^Topology=o127-149i	GO:0046345|abscisic acid catabolic process;GO:0006950|response to stress	GO:0010295|(+)-abscisic acid 8'-hydroxylase activity;GO:0009055|electron carrier activity;GO:0020037|heme binding;GO:0005506|iron ion binding	GO:0016021|integral to membrane	K09843|E1.14.13.93; (+)-abscisic acid 8'-hydroxylase [EC:1.14.13.93]	map00906|Carotenoid biosynthesis
c47880_g1	48.0152	5.58542	7.03768e-08	1.88357e-05	up	yes	gi|567173735|ref|XM_006399860.1|	564	0	Eutrema salsugineum hypothetical protein (EUTSA_v10014070mg) mRNA, complete cds	gi|685269914|ref|XP_009125965.1|	1454	0	PREDICTED: peroxidase 55-like [Brassica rapa]	sp|Q96509|PER55_ARATH	506	E:5e-178	RecName: Full=Peroxidase 55;^Eukaryota; Viridiplantae; Streptophyta; Embryophyta; Tracheophyta; Spermatophyta; Magnoliophyta; eudicotyledons; core eudicotyledons; rosids; malvids; Brassicales; Brassicaceae; Camelineae; Arabidopsis	sp|Q96509|PER55_ARATH	528	E:0	RecName: Full=Peroxidase 55;^Eukaryota; Viridiplantae; Streptophyta; Embryophyta; Tracheophyta; Spermatophyta; Magnoliophyta; eudicotyledons; core eudicotyledons; rosids; malvids; Brassicales; Brassicaceae; Camelineae; Arabidopsis	PF00141.18	peroxidase	Peroxidase	NOG254343	Sodium channel	.	c47880_g1|m.5058	86-1081[+]	sigP:1^29^0.829^YES	.	GO:0042744|hydrogen peroxide catabolic process	GO:0020037|heme binding;GO:0046872|metal ion binding;GO:0004601|peroxidase activity	GO:0005576|extracellular region	K00430|E1.11.1.7; peroxidase [EC:1.11.1.7]	map01100|Metabolic pathways;map00940|Phenylpropanoid biosynthesis;map01110|Biosynthesis of secondary metabolites
c40437_g1	4.38423	2.13232	1.5343e-05	0.000952612	up	yes	gi|567164265|ref|XM_006397220.1|	1122	0	Eutrema salsugineum hypothetical protein (EUTSA_v10028574mg) mRNA, complete cds	gi|297822237|ref|XP_002879001.1|	2476	0	hypothetical protein ARALYDRAFT_901457 [Arabidopsis lyrata subsp. lyrata]	sp|O48786|C734A_ARATH	954	E:0	RecName: Full=Cytochrome P450 734A1;^Eukaryota; Viridiplantae; Streptophyta; Embryophyta; Tracheophyta; Spermatophyta; Magnoliophyta; eudicotyledons; core eudicotyledons; rosids; malvids; Brassicales; Brassicaceae; Camelineae; Arabidopsis	sp|O48786|C734A_ARATH	1008	E:0	RecName: Full=Cytochrome P450 734A1;^Eukaryota; Viridiplantae; Streptophyta; Embryophyta; Tracheophyta; Spermatophyta; Magnoliophyta; eudicotyledons; core eudicotyledons; rosids; malvids; Brassicales; Brassicaceae; Camelineae; Arabidopsis	PF00067.17	p450	Cytochrome P450	COG2124	Cytochrome P450	.	c40437_g1|m.6974	332-1909[-]	.	ExpAA=21.70^PredHel=1^Topology=i13-32o	GO:0010268|brassinosteroid homeostasis;GO:0016131|brassinosteroid metabolic process;GO:0040008|regulation of growth;GO:0009741|response to brassinosteroid stimulus;GO:0009416|response to light stimulus	GO:0009055|electron carrier activity;GO:0020037|heme binding;GO:0005506|iron ion binding;GO:0016705|oxidoreductase activity, acting on paired donors, with incorporation or reduction of molecular oxygen;GO:0008395|steroid hydroxylase activity	GO:0016021|integral to membrane	K15639|CYP734A1, BAS1; PHYB activation tagged suppressor 1 [EC:1.14.-.-]	map00905|Brassinosteroid biosynthesis
c43789_g1	16.8602	4.07555	0.000716436	0.0126967	up	yes	gi|31321893|gb|AY036606.1|	673	0	Brassica napus papillar cell-specific pectin methylesterase-like protein mRNA, complete cds	gi|674870915|emb|CDY63854.1|	1417	0	BnaC04g51830D [Brassica napus]	sp|O22256|PME20_ARATH	503	E:2e-166	RecName: Full=Probable pectinesterase/pectinesterase inhibitor 20;^Eukaryota; Viridiplantae; Streptophyta; Embryophyta; Tracheophyta; Spermatophyta; Magnoliophyta; eudicotyledons; core eudicotyledons; rosids; malvids; Brassicales; Brassicaceae; Camelineae; Arabidopsis`sp|O22256|PME20_ARATH	sp|O22256|PME20_ARATH	525	E:0	RecName: Full=Probable pectinesterase/pectinesterase inhibitor 20;^Eukaryota; Viridiplantae; Streptophyta; Embryophyta; Tracheophyta; Spermatophyta; Magnoliophyta; eudicotyledons; core eudicotyledons; rosids; malvids; Brassicales; Brassicaceae; Camelineae; Arabidopsis	PF04043.10	PMEI	Plant invertase/pectin methylesterase inhibitor	COG4677	Pectin methylesterase	.	c43789_g1|m.11340	122-1261[+]	sigP:1^23^0.887^YES	.	GO:0042545|cell wall modification;GO:0043086|negative regulation of catalytic activity;GO:0045490|pectin catabolic process	GO:0045330|aspartyl esterase activity;GO:0004857|enzyme inhibitor activity;GO:0030599|pectinesterase activity	GO:0005618|cell wall;GO:0005576|extracellular region	K01051|E3.1.1.11; pectinesterase [EC:3.1.1.11]	map01100|Metabolic pathways;map00040|Pentose and glucuronate interconversions;map00500|Starch and sucrose metabolism
c42000_g1	5.28799	2.40272	0.00226887	0.0266834	up	yes	gi|567127594|ref|XM_006391768.1|	397	0	Eutrema salsugineum hypothetical protein (EUTSA_v10023430mg) mRNA, complete cds	gi|567127595|ref|XP_006391830.1|	807	5e-103	hypothetical protein EUTSA_v10023430mg [Eutrema salsugineum]	sp|Q39044|VPEB_ARATH	309	E:5e-102	RecName: Full=Vacuolar-processing enzyme beta-isozyme;^Eukaryota; Viridiplantae; Streptophyta; Embryophyta; Tracheophyta; Spermatophyta; Magnoliophyta; eudicotyledons; core eudicotyledons; rosids; malvids; Brassicales; Brassicaceae; Camelineae; Arabidopsis	sp|Q39044|VPEB_ARATH	311	E:4e-103	RecName: Full=Vacuolar-processing enzyme beta-isozyme;^Eukaryota; Viridiplantae; Streptophyta; Embryophyta; Tracheophyta; Spermatophyta; Magnoliophyta; eudicotyledons; core eudicotyledons; rosids; malvids; Brassicales; Brassicaceae; Camelineae; Arabidopsis	PF01650.13	Peptidase_C13	Peptidase C13 family	COG5206	Glycosylphosphatidylinositol transamidase (GPIT), subunit GPI8	.	c42000_g1|m.11677	1-570[-]	sigP:1^18^0.701^YES	.	GO:0006508|proteolysis;GO:0006624|vacuolar protein processing	GO:0004197|cysteine-type endopeptidase activity	GO:0005773|vacuole	K01369|LGMN; legumain [EC:3.4.22.34]	map04142|Lysosome;map04612|Antigen processing and presentation
c48442_g1	19.2416	4.26615	8.75526e-06	0.000622052	up	yes	gi|297816617|ref|XM_002876146.1|	806	0	Arabidopsis lyrata subsp. lyrata hypothetical protein, mRNA	gi|674965317|emb|CDX67560.1|	1735	0	BnaA07g16000D [Brassica napus]	sp|Q9SCP2|PLY12_ARATH	665	E:0	RecName: Full=Probable pectate lyase 12;^Eukaryota; Viridiplantae; Streptophyta; Embryophyta; Tracheophyta; Spermatophyta; Magnoliophyta; eudicotyledons; core eudicotyledons; rosids; malvids; Brassicales; Brassicaceae; Camelineae; Arabidopsis`sp|Q9SCP2|PLY12_ARATH	sp|Q9SCP2|PLY12_ARATH	665	E:0	RecName: Full=Probable pectate lyase 12;^Eukaryota; Viridiplantae; Streptophyta; Embryophyta; Tracheophyta; Spermatophyta; Magnoliophyta; eudicotyledons; core eudicotyledons; rosids; malvids; Brassicales; Brassicaceae; Camelineae; Arabidopsis	PF00544.14	Pec_lyase_C	Pectate lyase	COG3866	Pectate lyase	.	c48442_g1|m.12614	288-1424[+]	.	ExpAA=30.75^PredHel=1^Topology=i7-24o	GO:0045490|pectin catabolic process	GO:0046872|metal ion binding;GO:0030570|pectate lyase activity	GO:0031225|anchored to membrane	K01728|pel; pectate lyase [EC:4.2.2.2]	map00040|Pentose and glucuronate interconversions
c43208_g1	9.45203	3.24062	0.000504466	0.0101657	up	yes	gi|567191429|ref|XM_006404855.1|	501	0	Eutrema salsugineum hypothetical protein (EUTSA_v10000219mg) mRNA, complete cds	gi|674239917|gb|KFK32682.1|	1010	3e-156	hypothetical protein AALP_AA6G275100 [Arabis alpina]	sp|Q9VCY8|ADRL_DROME	145	E:5e-36	RecName: Full=ADIPOR-like receptor CG5315;^Eukaryota; Metazoa; Ecdysozoa; Arthropoda; Hexapoda; Insecta; Pterygota; Neoptera; Endopterygota; Diptera; Brachycera; Muscomorpha; Ephydroidea; Drosophilidae; Drosophila; Sophophora	sp|Q09910|YAJB_SCHPO	61.2	E:1e-10	RecName: Full=Uncharacterized protein C30D11.11;^Eukaryota; Fungi; Dikarya; Ascomycota; Taphrinomycotina; Schizosaccharomycetes; Schizosaccharomycetales; Schizosaccharomycetaceae; Schizosaccharomyces	PF03006.15	HlyIII	Haemolysin-III related	COG1272	Predicted membrane protein, hemolysin III homolog	.	c43208_g1|m.13259	398-727[+]	.	ExpAA=20.09^PredHel=1^Topology=i71-90o	GO:0006882|cellular zinc ion homeostasis	GO:0046872|metal ion binding	GO:0005789|endoplasmic reticulum membrane;GO:0005794|Golgi apparatus;GO:0016021|integral to membrane	K07297|ADIPOR; adiponectin receptor	map04152|AMPK signaling pathway;map04932|Non-alcoholic fatty liver disease (NAFLD);map04920|Adipocytokine signaling pathway
c43208_g1	9.45203	3.24062	0.000504466	0.0101657	up	yes	gi|567191429|ref|XM_006404855.1|	501	0	Eutrema salsugineum hypothetical protein (EUTSA_v10000219mg) mRNA, complete cds	gi|674239917|gb|KFK32682.1|	1010	3e-156	hypothetical protein AALP_AA6G275100 [Arabis alpina]	sp|Q9VCY8|ADRL_DROME	145	E:5e-36	RecName: Full=ADIPOR-like receptor CG5315;^Eukaryota; Metazoa; Ecdysozoa; Arthropoda; Hexapoda; Insecta; Pterygota; Neoptera; Endopterygota; Diptera; Brachycera; Muscomorpha; Ephydroidea; Drosophilidae; Drosophila; Sophophora	sp|Q9VCY8|ADRL_DROME	145	E:1e-38	RecName: Full=ADIPOR-like receptor CG5315;^Eukaryota; Metazoa; Ecdysozoa; Arthropoda; Hexapoda; Insecta; Pterygota; Neoptera; Endopterygota; Diptera; Brachycera; Muscomorpha; Ephydroidea; Drosophilidae; Drosophila; Sophophora	PF03006.15	HlyIII	Haemolysin-III related	COG1272	Predicted membrane protein, hemolysin III homolog	.	c43208_g1|m.13257	822-1577[+]	.	ExpAA=133.77^PredHel=6^Topology=o55-77i84-106o116-138i150-172o177-199i220-242o	GO:0019395|fatty acid oxidation;GO:0009755|hormone-mediated signaling pathway	GO:0042562|hormone binding	GO:0016021|integral to membrane	K07297|ADIPOR; adiponectin receptor	map04152|AMPK signaling pathway;map04932|Non-alcoholic fatty liver disease (NAFLD);map04920|Adipocytokine signaling pathway
c48193_g1	4.16015	2.05664	0.00304568	0.0323049	up	yes	gi|567184235|ref|XM_006402859.1|	808	0	Eutrema salsugineum hypothetical protein (EUTSA_v10006039mg) mRNA, complete cds	gi|567184236|ref|XP_006402922.1|	1782	0	hypothetical protein EUTSA_v10006039mg [Eutrema salsugineum]	sp|P92976|STS3_ARATH	169	E:2e-45	RecName: Full=Strictosidine synthase 3;^Eukaryota; Viridiplantae; Streptophyta; Embryophyta; Tracheophyta; Spermatophyta; Magnoliophyta; eudicotyledons; core eudicotyledons; rosids; malvids; Brassicales; Brassicaceae; Camelineae; Arabidopsis	sp|P92976|STS3_ARATH	169	E:4e-47	RecName: Full=Strictosidine synthase 3;^Eukaryota; Viridiplantae; Streptophyta; Embryophyta; Tracheophyta; Spermatophyta; Magnoliophyta; eudicotyledons; core eudicotyledons; rosids; malvids; Brassicales; Brassicaceae; Camelineae; Arabidopsis	PF08450.7	SGL	SMP-30/Gluconolaconase/LRE-like region	COG3386	Gluconolactonase	.	c48193_g1|m.22650	168-1295[-]	.	ExpAA=22.38^PredHel=1^Topology=i7-29o	GO:0009820|alkaloid metabolic process;GO:0009058|biosynthetic process	GO:0016844|strictosidine synthase activity	GO:0009505|plant-type cell wall;GO:0005773|vacuole	K01757|E4.3.3.2; strictosidine synthase [EC:4.3.3.2]	map00901|Indole alkaloid biosynthesis;map01100|Metabolic pathways;map01110|Biosynthesis of secondary metabolites
c46152_g1	37.5338	5.23012	9.18116e-05	0.00336118	up	yes	gi|18417455|ref|NM_119120.1|	945	0	Arabidopsis thaliana cytokinin dehydrogenase 4 mRNA, complete cds	gi|15233677|ref|NP_194703.1|	2271	0	cytokinin dehydrogenase 4 [Arabidopsis thaliana]	sp|Q9FUJ2|CKX4_ARATH	879	E:0	RecName: Full=Cytokinin dehydrogenase 4;^Eukaryota; Viridiplantae; Streptophyta; Embryophyta; Tracheophyta; Spermatophyta; Magnoliophyta; eudicotyledons; core eudicotyledons; rosids; malvids; Brassicales; Brassicaceae; Camelineae; Arabidopsis	sp|Q9FUJ2|CKX4_ARATH	922	E:0	RecName: Full=Cytokinin dehydrogenase 4;^Eukaryota; Viridiplantae; Streptophyta; Embryophyta; Tracheophyta; Spermatophyta; Magnoliophyta; eudicotyledons; core eudicotyledons; rosids; malvids; Brassicales; Brassicaceae; Camelineae; Arabidopsis	PF01565.18	FAD_binding_4	FAD binding domain	COG0277	FAD/FMN-containing dehydrogenases	.	c46152_g1|m.27406	2-1606[+]	.	ExpAA=20.65^PredHel=1^Topology=i20-39o	GO:0009823|cytokinin catabolic process	GO:0019139|cytokinin dehydrogenase activity;GO:0050660|flavin adenine dinucleotide binding;GO:0008131|primary amine oxidase activity;GO:0008762|UDP-N-acetylmuramate dehydrogenase activity	GO:0005615|extracellular space	K00279|CKX; cytokinin dehydrogenase [EC:1.5.99.12]	map00908|Zeatin biosynthesis
c48398_g1	0.12471	-3.00335	0.00133161	0.0188509	down	yes	gi|567219225|ref|XM_006413179.1|	465	0	Eutrema salsugineum hypothetical protein (EUTSA_v10025781mg) mRNA, complete cds	gi|727526700|ref|XP_010438811.1|	1076	1e-141	PREDICTED: peroxidase 44 [Camelina sativa]	sp|Q93V93|PER44_ARATH	397	E:2e-134	RecName: Full=Peroxidase 44;^Eukaryota; Viridiplantae; Streptophyta; Embryophyta; Tracheophyta; Spermatophyta; Magnoliophyta; eudicotyledons; core eudicotyledons; rosids; malvids; Brassicales; Brassicaceae; Camelineae; Arabidopsis`sp|Q93V93|PER44_ARATH	sp|Q93V93|PER44_ARATH	397	E:4e-138	RecName: Full=Peroxidase 44;^Eukaryota; Viridiplantae; Streptophyta; Embryophyta; Tracheophyta; Spermatophyta; Magnoliophyta; eudicotyledons; core eudicotyledons; rosids; malvids; Brassicales; Brassicaceae; Camelineae; Arabidopsis	PF00141.18	peroxidase	Peroxidase	NOG254343	Sodium channel	.	c48398_g1|m.30046	1-693[+]	.	ExpAA=21.97^PredHel=1^Topology=i13-35o	GO:0042744|hydrogen peroxide catabolic process	GO:0020037|heme binding;GO:0046872|metal ion binding;GO:0004601|peroxidase activity	GO:0005576|extracellular region	K00430|E1.11.1.7; peroxidase [EC:1.11.1.7]	map01100|Metabolic pathways;map00940|Phenylpropanoid biosynthesis;map01110|Biosynthesis of secondary metabolites
c44808_g1	4.21489	2.07549	0.00013379	0.00433903	up	yes	gi|567170454|ref|XM_006398883.1|	373	0	Eutrema salsugineum hypothetical protein (EUTSA_v10013296mg) mRNA, complete cds	gi|567170455|ref|XP_006398946.1|	790	5e-99	hypothetical protein EUTSA_v10013296mg [Eutrema salsugineum]	sp|O48780|KCS11_ARATH	291	E:1e-93	RecName: Full=3-ketoacyl-CoA synthase 11;^Eukaryota; Viridiplantae; Streptophyta; Embryophyta; Tracheophyta; Spermatophyta; Magnoliophyta; eudicotyledons; core eudicotyledons; rosids; malvids; Brassicales; Brassicaceae; Camelineae; Arabidopsis	sp|O48780|KCS11_ARATH	291	E:2e-95	RecName: Full=3-ketoacyl-CoA synthase 11;^Eukaryota; Viridiplantae; Streptophyta; Embryophyta; Tracheophyta; Spermatophyta; Magnoliophyta; eudicotyledons; core eudicotyledons; rosids; malvids; Brassicales; Brassicaceae; Camelineae; Arabidopsis	PF08392.7	FAE1_CUT1_RppA	FAE1/Type III polyketide synthase-like protein	COG3424	Predicted naringenin-chalcone synthase	.	c44808_g1|m.32741	311-787[+]	.	ExpAA=45.04^PredHel=2^Topology=i30-52o72-94i	GO:0006633|fatty acid biosynthetic process;GO:0009409|response to cold;GO:0009416|response to light stimulus	GO:0033807|icosanoyl-CoA synthase activity	GO:0016021|integral to membrane	K15397|KCS; 3-ketoacyl-CoA synthase [EC:2.3.1.199]	map00062|Fatty acid elongation;map01110|Biosynthesis of secondary metabolites
c51772_g3	5.56055	2.47523	0.000782249	0.0134188	up	yes	gi|297812568|ref|XM_002874122.1|	584	0	Arabidopsis lyrata subsp. lyrata acidic endochitinase, mRNA	gi|567139034|ref|XP_006394666.1|	1414	0	hypothetical protein EUTSA_v10004675mg [Eutrema salsugineum]	sp|P19172|CHIA_ARATH	540	E:0	RecName: Full=Acidic endochitinase;^Eukaryota; Viridiplantae; Streptophyta; Embryophyta; Tracheophyta; Spermatophyta; Magnoliophyta; eudicotyledons; core eudicotyledons; rosids; malvids; Brassicales; Brassicaceae; Camelineae; Arabidopsis	sp|P19172|CHIA_ARATH	551	E:0	RecName: Full=Acidic endochitinase;^Eukaryota; Viridiplantae; Streptophyta; Embryophyta; Tracheophyta; Spermatophyta; Magnoliophyta; eudicotyledons; core eudicotyledons; rosids; malvids; Brassicales; Brassicaceae; Camelineae; Arabidopsis	PF00704.23	Glyco_hydro_18	Glycosyl hydrolases family 18	COG3469	Chitinase	.	c51772_g3|m.34390	2-931[+]	.	ExpAA=18.74^PredHel=1^Topology=i13-30o	GO:0042631|cellular response to water deprivation;GO:0006032|chitin catabolic process;GO:0000272|polysaccharide catabolic process;GO:0009409|response to cold;GO:0009642|response to light intensity;GO:0009651|response to salt stress;GO:0009611|response to wounding	GO:0043169|cation binding;GO:0004568|chitinase activity	GO:0005615|extracellular space	K01183|E3.2.1.14; chitinase [EC:3.2.1.14]	map01100|Metabolic pathways;map00520|Amino sugar and nucleotide sugar metabolism;map00500|Starch and sucrose metabolism
c49375_g1	23.0981	4.5297	0.00213471	0.0256646	up	yes	gi|567214100|ref|XM_006410988.1|	406	0	Eutrema salsugineum hypothetical protein (EUTSA_v10016868mg) mRNA, complete cds	gi|674855600|emb|CDY70745.1|	933	3e-119	BnaAnng34820D [Brassica napus]	sp|P24102|PER22_ARATH	351	E:8e-114	RecName: Full=Peroxidase 22;^Eukaryota; Viridiplantae; Streptophyta; Embryophyta; Tracheophyta; Spermatophyta; Magnoliophyta; eudicotyledons; core eudicotyledons; rosids; malvids; Brassicales; Brassicaceae; Camelineae; Arabidopsis`sp|P24102|PER22_ARATH	sp|P24102|PER22_ARATH	350	E:1e-119	RecName: Full=Peroxidase 22;^Eukaryota; Viridiplantae; Streptophyta; Embryophyta; Tracheophyta; Spermatophyta; Magnoliophyta; eudicotyledons; core eudicotyledons; rosids; malvids; Brassicales; Brassicaceae; Camelineae; Arabidopsis	PF00141.18	peroxidase	Peroxidase	euNOG17919	#NAME?	.	c49375_g1|m.36020	1213-1818[-]	sigP:1^29^0.607^YES	.	GO:0042744|hydrogen peroxide catabolic process;GO:0009651|response to salt stress;GO:0010043|response to zinc ion	GO:0020037|heme binding;GO:0046872|metal ion binding;GO:0004601|peroxidase activity	GO:0005576|extracellular region;GO:0009505|plant-type cell wall;GO:0005773|vacuole	K00430|E1.11.1.7; peroxidase [EC:1.11.1.7]	map01100|Metabolic pathways;map00940|Phenylpropanoid biosynthesis;map01110|Biosynthesis of secondary metabolites
c39087_g3	74.8675	6.22627	5.54161e-08	1.60806e-05	up	yes	gi|332656411|gb|CP002687.1|	338	3e-176	Arabidopsis thaliana chromosome 4 sequence	gi|16323067|gb|AAL15268.1|	849	9e-112	AT4g13770/F18A5_160 [Arabidopsis thaliana]	sp|P48421|C83A1_ARATH	330	E:5e-110	RecName: Full=Cytochrome P450 83A1;^Eukaryota; Viridiplantae; Streptophyta; Embryophyta; Tracheophyta; Spermatophyta; Magnoliophyta; eudicotyledons; core eudicotyledons; rosids; malvids; Brassicales; Brassicaceae; Camelineae; Arabidopsis	sp|P48421|C83A1_ARATH	353	E:4e-119	RecName: Full=Cytochrome P450 83A1;^Eukaryota; Viridiplantae; Streptophyta; Embryophyta; Tracheophyta; Spermatophyta; Magnoliophyta; eudicotyledons; core eudicotyledons; rosids; malvids; Brassicales; Brassicaceae; Camelineae; Arabidopsis	PF00067.17	p450	Cytochrome P450	COG2124	Cytochrome P450	.	c39087_g3|m.37972	3-584[+]	.	ExpAA=18.01^PredHel=1^Topology=o5-22i	GO:0019761|glucosinolate biosynthetic process	GO:0009055|electron carrier activity;GO:0020037|heme binding;GO:0005506|iron ion binding;GO:0016709|oxidoreductase activity, acting on paired donors, with incorporation or reduction of molecular oxygen, NAD(P)H as one donor, and incorporation of one atom of oxygen	GO:0005789|endoplasmic reticulum membrane;GO:0016021|integral to membrane	K12156|CYP83A1; cytochrome P450, family 83, subfamily A, polypeptide 1 [EC:1.14.-.-]	map00966|Glucosinolate biosynthesis;map01110|Biosynthesis of secondary metabolites;map01210|2-Oxocarboxylic acid metabolism
c39726_g3	6.0327	2.5928	0.00511763	0.0455825	up	yes	gi|297838522|ref|XM_002887097.1|	655	0	Arabidopsis lyrata subsp. lyrata pectate lyase family protein, mRNA	gi|674248422|gb|KFK41187.1|	1525	0	hypothetical protein AALP_AA2G097000 [Arabis alpina]	sp|Q9FXD8|PLY5_ARATH	588	E:0	RecName: Full=Probable pectate lyase 5;^Eukaryota; Viridiplantae; Streptophyta; Embryophyta; Tracheophyta; Spermatophyta; Magnoliophyta; eudicotyledons; core eudicotyledons; rosids; malvids; Brassicales; Brassicaceae; Camelineae; Arabidopsis	sp|Q9FXD8|PLY5_ARATH	588	E:0	RecName: Full=Probable pectate lyase 5;^Eukaryota; Viridiplantae; Streptophyta; Embryophyta; Tracheophyta; Spermatophyta; Magnoliophyta; eudicotyledons; core eudicotyledons; rosids; malvids; Brassicales; Brassicaceae; Camelineae; Arabidopsis	PF00544.14	Pec_lyase_C	Pectate lyase	COG3866	Pectate lyase	.	c39726_g3|m.38278	48-983[+]	sigP:1^26^0.793^YES	ExpAA=29.03^PredHel=1^Topology=i7-29o	GO:0045490|pectin catabolic process	GO:0046872|metal ion binding;GO:0030570|pectate lyase activity	.	K01728|pel; pectate lyase [EC:4.2.2.2]	map00040|Pentose and glucuronate interconversions
c49569_g2	12.3356	3.62475	1.02894e-05	0.000707353	up	yes	gi|297799519|ref|XM_002867598.1|	933	0	Arabidopsis lyrata subsp. lyrata pectate lyase family protein, mRNA	gi|674929875|emb|CDY03419.1|	1935	0	BnaC01g16630D [Brassica napus]	sp|Q9C5M8|PLY18_ARATH	717	E:0	RecName: Full=Probable pectate lyase 18;^Eukaryota; Viridiplantae; Streptophyta; Embryophyta; Tracheophyta; Spermatophyta; Magnoliophyta; eudicotyledons; core eudicotyledons; rosids; malvids; Brassicales; Brassicaceae; Camelineae; Arabidopsis	sp|Q9C5M8|PLY18_ARATH	764	E:0	RecName: Full=Probable pectate lyase 18;^Eukaryota; Viridiplantae; Streptophyta; Embryophyta; Tracheophyta; Spermatophyta; Magnoliophyta; eudicotyledons; core eudicotyledons; rosids; malvids; Brassicales; Brassicaceae; Camelineae; Arabidopsis	PF00544.14	Pec_lyase_C	Pectate lyase	COG3866	Pectate lyase	.	c49569_g2|m.38505	484-1707[-]	sigP:1^23^0.728^YES	.	GO:0045490|pectin catabolic process	GO:0046872|metal ion binding;GO:0030570|pectate lyase activity	GO:0016020|membrane	K01728|pel; pectate lyase [EC:4.2.2.2]	map00040|Pentose and glucuronate interconversions
c49231_g1	2.88483	1.52849	5.29314e-07	7.72042e-05	up	yes	gi|567215384|ref|XM_006411322.1|	1079	0	Eutrema salsugineum hypothetical protein (EUTSA_v10016504mg) mRNA, complete cds	gi|567215385|ref|XP_006411385.1|	2090	0	hypothetical protein EUTSA_v10016504mg [Eutrema salsugineum]	sp|P47082|AVT1_YEAST	132	E:1e-30	RecName: Full=Vacuolar amino acid transporter 1;^Eukaryota; Fungi; Dikarya; Ascomycota; Saccharomycotina; Saccharomycetes; Saccharomycetales; Saccharomycetaceae; Saccharomyces	sp|P47082|AVT1_YEAST	134	E:2e-32	RecName: Full=Vacuolar amino acid transporter 1;^Eukaryota; Fungi; Dikarya; Ascomycota; Saccharomycotina; Saccharomycetes; Saccharomycetales; Saccharomycetaceae; Saccharomyces	PF01490.13	Aa_trans	Transmembrane amino acid transporter protein	COG0814	Amino acid permeases	.	c49231_g1|m.40652	166-1701[+]	.	ExpAA=190.44^PredHel=9^Topology=i136-158o168-190i215-237o257-279i284-306o326-348i361-383o442-464i477-494o	GO:0007034|vacuolar transport	GO:0015186|L-glutamine transmembrane transporter activity;GO:0015188|L-isoleucine transmembrane transporter activity;GO:0005302|L-tyrosine transmembrane transporter activity	GO:0000329|fungal-type vacuole membrane;GO:0016021|integral to membrane	K15015|SLC32A, VGAT; solute carrier family 32 (vesicular inhibitory amino acid transporter)	map05032|Morphine addiction;map04721|Synaptic vesicle cycle;map04723|Retrograde endocannabinoid signaling;map04727|GABAergic synapse;map05033|Nicotine addiction
c49728_g3	3.64405	1.86554	0.000338114	0.00783239	up	yes	gi|567198259|ref|XM_006406736.1|	315	2e-163	Eutrema salsugineum hypothetical protein (EUTSA_v100202130mg) mRNA, partial cds	gi|312283277|dbj|BAJ34504.1|	487	1e-54	unnamed protein product [Thellungiella halophila]	sp|Q940D0|ARR1_ARATH	190	E:3e-55	RecName: Full=Two-component response regulator ARR1;^Eukaryota; Viridiplantae; Streptophyta; Embryophyta; Tracheophyta; Spermatophyta; Magnoliophyta; eudicotyledons; core eudicotyledons; rosids; malvids; Brassicales; Brassicaceae; Camelineae; Arabidopsis	sp|Q940D0|ARR1_ARATH	196	E:3e-57	RecName: Full=Two-component response regulator ARR1;^Eukaryota; Viridiplantae; Streptophyta; Embryophyta; Tracheophyta; Spermatophyta; Magnoliophyta; eudicotyledons; core eudicotyledons; rosids; malvids; Brassicales; Brassicaceae; Camelineae; Arabidopsis	PF00072.19	Response_reg	Response regulator receiver domain	COG0745	Response regulators consisting of a CheY-like receiver domain and a winged-helix DNA-binding domain	.	c49728_g3|m.43326	3-542[+]	.	ExpAA=25.51^PredHel=1^Topology=o18-40i	GO:0009736|cytokinin mediated signaling pathway;GO:0080022|primary root development;GO:0031537|regulation of anthocyanin metabolic process;GO:0010380|regulation of chlorophyll biosynthetic process;GO:0048367|shoot development;GO:0006351|transcription, DNA-dependent	GO:0003682|chromatin binding;GO:0003677|DNA binding;GO:0000156|phosphorelay response regulator activity;GO:0003700|sequence-specific DNA binding transcription factor activity	GO:0005634|nucleus	K14491|ARR-B; two-component response regulator ARR-B family	map04075|Plant hormone signal transduction
c46870_g1	0.386331	-1.37209	0.00440764	0.0411465	down	yes	gi|567198641|ref|XM_006406846.1|	590	0	Eutrema salsugineum hypothetical protein (EUTSA_v10020955mg) mRNA, complete cds	gi|567198642|ref|XP_006406909.1|	1237	3e-162	hypothetical protein EUTSA_v10020955mg [Eutrema salsugineum]	sp|Q949X0|ADS3_ARATH	450	E:2e-151	RecName: Full=Palmitoyl-monogalactosyldiacylglycerol delta-7 desaturase, chloroplastic;^Eukaryota; Viridiplantae; Streptophyta; Embryophyta; Tracheophyta; Spermatophyta; Magnoliophyta; eudicotyledons; core eudicotyledons; rosids; malvids; Brassicales; Brassicaceae; Camelineae; Arabidopsis`sp|Q949X0|ADS3_ARATH	sp|Q949X0|ADS3_ARATH	463	E:1e-162	RecName: Full=Palmitoyl-monogalactosyldiacylglycerol delta-7 desaturase, chloroplastic;^Eukaryota; Viridiplantae; Streptophyta; Embryophyta; Tracheophyta; Spermatophyta; Magnoliophyta; eudicotyledons; core eudicotyledons; rosids; malvids; Brassicales; Brassicaceae; Camelineae; Arabidopsis	PF00487.19	FA_desaturase	Fatty acid desaturase	COG1398	Fatty-acid desaturase	.	c46870_g1|m.43836	948-1769[-]	.	ExpAA=62.20^PredHel=2^Topology=o128-150i248-270o	GO:0031408|oxylipin biosynthetic process;GO:0010205|photoinhibition;GO:0006636|unsaturated fatty acid biosynthetic process	GO:0016717|oxidoreductase activity, acting on paired donors, with oxidation of a pair of donors resulting in the reduction of molecular oxygen to two molecules of water	GO:0031969|chloroplast membrane;GO:0016021|integral to membrane;GO:0009579|thylakoid	K00507|SCD, desC; stearoyl-CoA desaturase (delta-9 desaturase) [EC:1.14.19.1]	map03320|PPAR signaling pathway;map04152|AMPK signaling pathway;map01212|Fatty acid metabolism;map01040|Biosynthesis of unsaturated fatty acids
c33789_g2	4.69589	2.2314	0.00357697	0.0359352	up	yes	gi|567120839|ref|XM_006390177.1|	691	0	Eutrema salsugineum hypothetical protein (EUTSA_v10018759mg) mRNA, complete cds	gi|567120840|ref|XP_006390239.1|	1650	0	hypothetical protein EUTSA_v10018759mg [Eutrema salsugineum]	sp|Q94JS4|SMT3B_ARATH	617	E:0	RecName: Full=24-methylenesterol C-methyltransferase 3;^Eukaryota; Viridiplantae; Streptophyta; Embryophyta; Tracheophyta; Spermatophyta; Magnoliophyta; eudicotyledons; core eudicotyledons; rosids; malvids; Brassicales; Brassicaceae; Camelineae; Arabidopsis	sp|Q94JS4|SMT3B_ARATH	634	E:0	RecName: Full=24-methylenesterol C-methyltransferase 3;^Eukaryota; Viridiplantae; Streptophyta; Embryophyta; Tracheophyta; Spermatophyta; Magnoliophyta; eudicotyledons; core eudicotyledons; rosids; malvids; Brassicales; Brassicaceae; Camelineae; Arabidopsis	PF02353.15	CMAS	Mycolic acid cyclopropane synthetase	COG0500	SAM-dependent methyltransferases	.	c33789_g2|m.45754	228-1223[+]	.	ExpAA=40.38^PredHel=2^Topology=o4-26i299-321o	GO:0016126|sterol biosynthetic process	GO:0030797|24-methylenesterol C-methyltransferase activity;GO:0003838|sterol 24-C-methyltransferase activity	GO:0005783|endoplasmic reticulum;GO:0016021|integral to membrane	K08242|E2.1.1.143; 24-methylenesterol C-methyltransferase [EC:2.1.1.143]	map00100|Steroid biosynthesis;map01110|Biosynthesis of secondary metabolites
c49072_g5	15.0228	3.90908	5.68962e-06	0.000455947	up	yes	gi|565490995|ref|XM_006303075.1|	1218	0	Capsella rubella hypothetical protein (CARUB_v10008098mg) mRNA, partial cds	gi|727603239|ref|XP_010474667.1|	2355	0	PREDICTED: ABC transporter B family member 11-like [Camelina sativa]	sp|Q9FWX7|AB11B_ARATH	889	E:0	RecName: Full=ABC transporter B family member 11;^Eukaryota; Viridiplantae; Streptophyta; Embryophyta; Tracheophyta; Spermatophyta; Magnoliophyta; eudicotyledons; core eudicotyledons; rosids; malvids; Brassicales; Brassicaceae; Camelineae; Arabidopsis`sp|Q9FWX7|AB11B_ARATH	sp|Q9FWX7|AB11B_ARATH	928	E:0	RecName: Full=ABC transporter B family member 11;^Eukaryota; Viridiplantae; Streptophyta; Embryophyta; Tracheophyta; Spermatophyta; Magnoliophyta; eudicotyledons; core eudicotyledons; rosids; malvids; Brassicales; Brassicaceae; Camelineae; Arabidopsis`sp|Q9FWX7|AB11B_ARATH	PF00664.18	ABC_membrane	ABC transporter transmembrane region	COG1132	ABC-type multidrug transport system, ATPase and permease components	.	c49072_g5|m.45843	3-1580[-]	.	ExpAA=128.45^PredHel=6^Topology=i56-78o107-129i180-199o204-226i285-307o317-336i	GO:0006200|ATP catabolic process	GO:0005524|ATP binding;GO:0042626|ATPase activity, coupled to transmembrane movement of substances	GO:0016021|integral to membrane;GO:0005886|plasma membrane;GO:0009506|plasmodesma	K05658|ABCB1; ATP-binding cassette, subfamily B (MDR/TAP), member 1 [EC:3.6.3.44]	map02010|ABC transporters;map05206|MicroRNAs in cancer;map04976|Bile secretion
c39087_g1	46.6294	5.54317	7.65059e-08	1.97106e-05	up	yes	gi|514245372|gb|KF111569.1|	399	0	Brassica juncea cytochrome P450 monooxygenase CYP83A1 (CYP83A1.3) mRNA, complete cds	gi|514245365|gb|AGO37756.1|	1033	6e-135	cytochrome P450 monooxygenase CYP83A1 [Brassica juncea]	sp|P48421|C83A1_ARATH	392	E:2e-132	RecName: Full=Cytochrome P450 83A1;^Eukaryota; Viridiplantae; Streptophyta; Embryophyta; Tracheophyta; Spermatophyta; Magnoliophyta; eudicotyledons; core eudicotyledons; rosids; malvids; Brassicales; Brassicaceae; Camelineae; Arabidopsis	sp|P48421|C83A1_ARATH	420	E:2e-144	RecName: Full=Cytochrome P450 83A1;^Eukaryota; Viridiplantae; Streptophyta; Embryophyta; Tracheophyta; Spermatophyta; Magnoliophyta; eudicotyledons; core eudicotyledons; rosids; malvids; Brassicales; Brassicaceae; Camelineae; Arabidopsis	PF00067.17	p450	Cytochrome P450	COG2124	Cytochrome P450	.	c39087_g1|m.45976	3-701[+]	.	ExpAA=20.92^PredHel=1^Topology=i24-46o	GO:0019761|glucosinolate biosynthetic process	GO:0009055|electron carrier activity;GO:0020037|heme binding;GO:0005506|iron ion binding;GO:0016709|oxidoreductase activity, acting on paired donors, with incorporation or reduction of molecular oxygen, NAD(P)H as one donor, and incorporation of one atom of oxygen	GO:0005789|endoplasmic reticulum membrane;GO:0016021|integral to membrane	K12156|CYP83A1; cytochrome P450, family 83, subfamily A, polypeptide 1 [EC:1.14.-.-]	map00966|Glucosinolate biosynthesis;map01110|Biosynthesis of secondary metabolites;map01210|2-Oxocarboxylic acid metabolism
c44313_g3	12.1122	3.59838	0.00146564	0.0201311	up	yes	gi|297848479|ref|XM_002892075.1|	363	0	Arabidopsis lyrata subsp. lyrata hypothetical protein, mRNA	gi|727569455|ref|XP_010457259.1|	833	3e-100	PREDICTED: cellulose synthase-like protein D5 isoform X3 [Camelina sativa]	sp|Q9SRW9|CSLD5_ARATH	322	E:2e-100	RecName: Full=Cellulose synthase-like protein D5;^Eukaryota; Viridiplantae; Streptophyta; Embryophyta; Tracheophyta; Spermatophyta; Magnoliophyta; eudicotyledons; core eudicotyledons; rosids; malvids; Brassicales; Brassicaceae; Camelineae; Arabidopsis	sp|Q9SRW9|CSLD5_ARATH	322	E:1e-101	RecName: Full=Cellulose synthase-like protein D5;^Eukaryota; Viridiplantae; Streptophyta; Embryophyta; Tracheophyta; Spermatophyta; Magnoliophyta; eudicotyledons; core eudicotyledons; rosids; malvids; Brassicales; Brassicaceae; Camelineae; Arabidopsis	PF03552.9	Cellulose_synt	Cellulose synthase	COG1215	Glycosyltransferases, probably involved in cell wall biogenesis	.	c44313_g3|m.49197	2-484[+]	.	ExpAA=69.41^PredHel=3^Topology=i58-80o95-112i125-144o	GO:0042546|cell wall biogenesis;GO:0030244|cellulose biosynthetic process;GO:0009651|response to salt stress;GO:0009414|response to water deprivation;GO:0048367|shoot development	GO:0016760|cellulose synthase (UDP-forming) activity;GO:0046527|glucosyltransferase activity;GO:0051753|mannan synthase activity	GO:0005794|Golgi apparatus;GO:0000139|Golgi membrane;GO:0016021|integral to membrane	K00770|E2.4.2.24; 1,4-beta-D-xylan synthase [EC:2.4.2.24]	map01100|Metabolic pathways;map00500|Starch and sucrose metabolism;map00520|Amino sugar and nucleotide sugar metabolism
c44313_g1	18.1299	4.1803	5.74004e-05	0.00241581	up	yes	gi|567156259|ref|XM_006418248.1|	872	0	Eutrema salsugineum hypothetical protein (EUTSA_v10006597mg) mRNA, complete cds	gi|674249861|gb|KFK42626.1|	1909	0	hypothetical protein AALP_AA1G019700 [Arabis alpina]	sp|Q9SRW9|CSLD5_ARATH	732	E:0	RecName: Full=Cellulose synthase-like protein D5;^Eukaryota; Viridiplantae; Streptophyta; Embryophyta; Tracheophyta; Spermatophyta; Magnoliophyta; eudicotyledons; core eudicotyledons; rosids; malvids; Brassicales; Brassicaceae; Camelineae; Arabidopsis	sp|Q9SRW9|CSLD5_ARATH	793	E:0	RecName: Full=Cellulose synthase-like protein D5;^Eukaryota; Viridiplantae; Streptophyta; Embryophyta; Tracheophyta; Spermatophyta; Magnoliophyta; eudicotyledons; core eudicotyledons; rosids; malvids; Brassicales; Brassicaceae; Camelineae; Arabidopsis	PF03552.9	Cellulose_synt	Cellulose synthase	COG1215	Glycosyltransferases, probably involved in cell wall biogenesis	.	c44313_g1|m.50216	1-1179[-]	.	ExpAA=44.85^PredHel=2^Topology=i319-341o356-375i	GO:0042546|cell wall biogenesis;GO:0030244|cellulose biosynthetic process;GO:0009651|response to salt stress;GO:0009414|response to water deprivation;GO:0048367|shoot development	GO:0016760|cellulose synthase (UDP-forming) activity;GO:0046527|glucosyltransferase activity;GO:0051753|mannan synthase activity	GO:0005794|Golgi apparatus;GO:0000139|Golgi membrane;GO:0016021|integral to membrane	K00770|E2.4.2.24; 1,4-beta-D-xylan synthase [EC:2.4.2.24]	map01100|Metabolic pathways;map00500|Starch and sucrose metabolism;map00520|Amino sugar and nucleotide sugar metabolism
c29727_g1	3.25664	1.70339	0.00482383	0.0436424	up	yes	gi|567120813|ref|XM_006390170.1|	384	0	Eutrema salsugineum hypothetical protein (EUTSA_v10018135mg) mRNA, complete cds	gi|567120814|ref|XP_006390232.1|	872	3e-108	hypothetical protein EUTSA_v10018135mg [Eutrema salsugineum]	sp|P48147|PPCE_HUMAN	201	E:9e-58	RecName: Full=Prolyl endopeptidase;^Eukaryota; Metazoa; Chordata; Craniata; Vertebrata; Euteleostomi; Mammalia; Eutheria; Euarchontoglires; Primates; Haplorrhini; Catarrhini; Hominidae; Homo	sp|P48147|PPCE_HUMAN	201	E:4e-58	RecName: Full=Prolyl endopeptidase;^Eukaryota; Metazoa; Chordata; Craniata; Vertebrata; Euteleostomi; Mammalia; Eutheria; Euarchontoglires; Primates; Haplorrhini; Catarrhini; Hominidae; Homo	PF02897.10	Peptidase_S9_N	Prolyl oligopeptidase, N-terminal beta-propeller domain	COG1505	Serine proteases of the peptidase family S9A	.	c29727_g1|m.51225	60-776[+]	.	ExpAA=39.16^PredHel=2^Topology=o5-27i34-51o	GO:0006508|proteolysis	GO:0042277|peptide binding;GO:0004252|serine-type endopeptidase activity;GO:0070008|serine-type exopeptidase activity	GO:0005737|cytoplasm;GO:0005829|cytosol;GO:0005634|nucleus	K01322|PREP; prolyl oligopeptidase [EC:3.4.21.26]	map04614|Renin-angiotensin system
c42471_g1	3.13107	1.64666	5.24254e-07	7.68729e-05	up	yes	gi|567154540|ref|XM_006417745.1|	708	0	Eutrema salsugineum hypothetical protein (EUTSA_v10006859mg) mRNA, complete cds	gi|8778548|gb|AAF79556.1|AC022464_14	1478	0	F22G5.28 [Arabidopsis thaliana]	sp|Q304B9|NCASE_ARATH	431	E:5e-148	RecName: Full=Neutral ceramidase;^Eukaryota; Viridiplantae; Streptophyta; Embryophyta; Tracheophyta; Spermatophyta; Magnoliophyta; eudicotyledons; core eudicotyledons; rosids; malvids; Brassicales; Brassicaceae; Camelineae; Arabidopsis`sp|Q304B9|NCASE_ARATH	sp|Q304B9|NCASE_ARATH	431	E:4e-144	RecName: Full=Neutral ceramidase;^Eukaryota; Viridiplantae; Streptophyta; Embryophyta; Tracheophyta; Spermatophyta; Magnoliophyta; eudicotyledons; core eudicotyledons; rosids; malvids; Brassicales; Brassicaceae; Camelineae; Arabidopsis	PF04734.8	Ceramidase_alk	Neutral/alkaline non-lysosomal ceramidase	NOG75118	Ceramidase	.	c42471_g1|m.57669	689-1582[+]	.	ExpAA=22.24^PredHel=1^Topology=i12-34o	GO:0006665|sphingolipid metabolic process	GO:0017040|ceramidase activity	GO:0005576|extracellular region	K12349|ASAH2; neutral ceramidase [EC:3.5.1.23]	map04071|Sphingolipid signaling pathway;map01100|Metabolic pathways;map00600|Sphingolipid metabolism
c49698_g2	0.462778	-1.11161	0.00216676	0.02588	down	yes	gi|567159671|ref|XM_006419014.1|	475	0	Eutrema salsugineum hypothetical protein (EUTSA_v10002461mg) mRNA, complete cds	gi|22331608|ref|NP_190090.2|	831	4e-148	putative dolichol kinase [Arabidopsis thaliana]	sp|Q9UPQ8|DOLK_HUMAN	111	E:3e-25	RecName: Full=Dolichol kinase;^Eukaryota; Metazoa; Chordata; Craniata; Vertebrata; Euteleostomi; Mammalia; Eutheria; Euarchontoglires; Primates; Haplorrhini; Catarrhini; Hominidae; Homo	sp|Q8R2Y3|DOLK_MOUSE	92	E:8e-21	RecName: Full=Dolichol kinase;^Eukaryota; Metazoa; Chordata; Craniata; Vertebrata; Euteleostomi; Mammalia; Eutheria; Euarchontoglires; Glires; Rodentia; Sciurognathi; Muroidea; Muridae; Murinae; Mus; Mus	PF01148.15	CTP_transf_1	Cytidylyltransferase family	COG0170	Dolichol kinase	.	c49698_g2|m.64839	160-588[-]	.	ExpAA=74.03^PredHel=3^Topology=i12-34o38-60i81-103o	GO:0043048|dolichyl monophosphate biosynthetic process	GO:0004168|dolichol kinase activity	GO:0030176|integral to endoplasmic reticulum membrane	K00902|E2.7.1.108; dolichol kinase [EC:2.7.1.108]	map01100|Metabolic pathways;map00510|N-Glycan biosynthesis
c51816_g1	0.32025	-1.64273	0.00119429	0.0175799	down	yes	gi|297851227|ref|XM_002893449.1|	1993	0	Arabidopsis lyrata subsp. lyrata P-glycoprotein 13 (PGP13), mRNA	gi|297851228|ref|XP_002893495.1|	4214	0	P-glycoprotein 13 [Arabidopsis lyrata subsp. lyrata]	sp|Q9C7F8|AB13B_ARATH	1607	E:0	RecName: Full=ABC transporter B family member 13;^Eukaryota; Viridiplantae; Streptophyta; Embryophyta; Tracheophyta; Spermatophyta; Magnoliophyta; eudicotyledons; core eudicotyledons; rosids; malvids; Brassicales; Brassicaceae; Camelineae; Arabidopsis`sp|Q9C7F8|AB13B_ARATH	sp|Q9C7F8|AB13B_ARATH	574	E:0	RecName: Full=ABC transporter B family member 13;^Eukaryota; Viridiplantae; Streptophyta; Embryophyta; Tracheophyta; Spermatophyta; Magnoliophyta; eudicotyledons; core eudicotyledons; rosids; malvids; Brassicales; Brassicaceae; Camelineae; Arabidopsis`sp|Q9C7F8|AB13B_ARATH	PF00664.18	ABC_membrane	ABC transporter transmembrane region	COG1132	ABC-type multidrug transport system, ATPase and permease components	.	c51816_g1|m.65274	2-1045[+]	sigP:1^23^0.587^YES	ExpAA=117.09^PredHel=5^Topology=i70-92o118-140i197-216o221-243i300-322o	GO:0010541|acropetal auxin transport;GO:0010540|basipetal auxin transport	GO:0005524|ATP binding;GO:0042626|ATPase activity, coupled to transmembrane movement of substances;GO:0010329|auxin efflux transmembrane transporter activity	GO:0016021|integral to membrane;GO:0005886|plasma membrane	K05658|ABCB1; ATP-binding cassette, subfamily B (MDR/TAP), member 1 [EC:3.6.3.44]	map02010|ABC transporters;map05206|MicroRNAs in cancer;map04976|Bile secretion
c51816_g1	0.32025	-1.64273	0.00119429	0.0175799	down	yes	gi|297851227|ref|XM_002893449.1|	1993	0	Arabidopsis lyrata subsp. lyrata P-glycoprotein 13 (PGP13), mRNA	gi|297851228|ref|XP_002893495.1|	4214	0	P-glycoprotein 13 [Arabidopsis lyrata subsp. lyrata]	sp|Q9C7F8|AB13B_ARATH	1607	E:0	RecName: Full=ABC transporter B family member 13;^Eukaryota; Viridiplantae; Streptophyta; Embryophyta; Tracheophyta; Spermatophyta; Magnoliophyta; eudicotyledons; core eudicotyledons; rosids; malvids; Brassicales; Brassicaceae; Camelineae; Arabidopsis`sp|Q9C7F8|AB13B_ARATH	sp|Q9C7F8|AB13B_ARATH	1642	E:0	RecName: Full=ABC transporter B family member 13;^Eukaryota; Viridiplantae; Streptophyta; Embryophyta; Tracheophyta; Spermatophyta; Magnoliophyta; eudicotyledons; core eudicotyledons; rosids; malvids; Brassicales; Brassicaceae; Camelineae; Arabidopsis`sp|Q9C7F8|AB13B_ARATH	PF00005.22	ABC_tran	ABC transporter	COG1132	ABC-type multidrug transport system, ATPase and permease components	.	c51816_g1|m.65273	1197-3896[+]	.	ExpAA=127.45^PredHel=6^Topology=o349-371i378-400o456-478i480-502o565-587i600-622o	GO:0010541|acropetal auxin transport;GO:0010540|basipetal auxin transport	GO:0005524|ATP binding;GO:0042626|ATPase activity, coupled to transmembrane movement of substances;GO:0010329|auxin efflux transmembrane transporter activity	GO:0016021|integral to membrane;GO:0005886|plasma membrane	K05658|ABCB1; ATP-binding cassette, subfamily B (MDR/TAP), member 1 [EC:3.6.3.44]	map02010|ABC transporters;map05206|MicroRNAs in cancer;map04976|Bile secretion
c50722_g1	8.50391	3.08813	2.67577e-05	0.00139438	up	yes	gi|312283044|dbj|AK353302.1|	1259	0	Thellungiella halophila mRNA, complete cds, clone: RTFL01-34-L20	gi|567138819|ref|XP_006394607.1|	2284	0	hypothetical protein EUTSA_v10003885mg [Eutrema salsugineum]	sp|Q9FL28|FLS2_ARATH	201	E:1e-52	RecName: Full=LRR receptor-like serine/threonine-protein kinase FLS2;^Eukaryota; Viridiplantae; Streptophyta; Embryophyta; Tracheophyta; Spermatophyta; Magnoliophyta; eudicotyledons; core eudicotyledons; rosids; malvids; Brassicales; Brassicaceae; Camelineae; Arabidopsis`sp|Q9FL28|FLS2_ARATH	sp|Q9M2Z1|BAME2_ARATH	225	E:4e-62	RecName: Full=Leucine-rich repeat receptor-like serine/threonine-protein kinase BAM2;^Eukaryota; Viridiplantae; Streptophyta; Embryophyta; Tracheophyta; Spermatophyta; Magnoliophyta; eudicotyledons; core eudicotyledons; rosids; malvids; Brassicales; Brassicaceae; Camelineae; Arabidopsis	PF08263.7	LRRNT_2	Leucine rich repeat N-terminal domain	COG4886	Leucine-rich repeat (LRR) protein	.	c50722_g1|m.65811	243-2006[+]	sigP:1^25^0.767^YES	.	GO:0048229|gametophyte development;GO:0010480|microsporocyte differentiation;GO:0010075|regulation of meristem growth;GO:0009934|regulation of meristem structural organization	GO:0005524|ATP binding;GO:0004674|protein serine/threonine kinase activity	GO:0016021|integral to membrane;GO:0005886|plasma membrane	K13420|FLS2; LRR receptor-like serine/threonine-protein kinase FLS2 [EC:2.7.11.1]	map04626|Plant-pathogen interaction
c36028_g1	0.225048	-2.1517	0.00441639	0.0411863	down	yes	gi|567200846|ref|XM_006407476.1|	1022	0	Eutrema salsugineum hypothetical protein (EUTSA_v10020529mg) mRNA, complete cds	gi|567200847|ref|XP_006407539.1|	2435	0	hypothetical protein EUTSA_v10020529mg [Eutrema salsugineum]	sp|Q9LZ31|C77A4_ARATH	840	E:0	RecName: Full=Cytochrome P450 77A4;^Eukaryota; Viridiplantae; Streptophyta; Embryophyta; Tracheophyta; Spermatophyta; Magnoliophyta; eudicotyledons; core eudicotyledons; rosids; malvids; Brassicales; Brassicaceae; Camelineae; Arabidopsis	sp|Q9LZ31|C77A4_ARATH	829	E:0	RecName: Full=Cytochrome P450 77A4;^Eukaryota; Viridiplantae; Streptophyta; Embryophyta; Tracheophyta; Spermatophyta; Magnoliophyta; eudicotyledons; core eudicotyledons; rosids; malvids; Brassicales; Brassicaceae; Camelineae; Arabidopsis	PF00067.17	p450	Cytochrome P450	COG2124	Cytochrome P450	.	c36028_g1|m.68549	177-1727[-]	.	ExpAA=33.45^PredHel=1^Topology=o15-34i	GO:0019395|fatty acid oxidation	GO:0009055|electron carrier activity;GO:0020037|heme binding;GO:0005506|iron ion binding;GO:0004497|monooxygenase activity;GO:0016705|oxidoreductase activity, acting on paired donors, with incorporation or reduction of molecular oxygen	GO:0016021|integral to membrane	K00517|E1.14.-.-	map00945|Stilbenoid, diarylheptanoid and gingerol biosynthesis;map00624|Polycyclic aromatic hydrocarbon degradation;map00627|Aminobenzoate degradation;map01110|Biosynthesis of secondary metabolites;map00363|Bisphenol degradation;map01100|Metabolic pathways;map01120|Microbial metabolism in diverse environments;map00903|Limonene and pinene degradation
c38356_g1	2.80455	1.48777	0.00588795	0.0498505	up	yes	gi|565498373|ref|XM_006306764.1|	533	0	Capsella rubella hypothetical protein (CARUB_v10008368mg) mRNA, complete cds	gi|727605816|ref|XP_010475979.1|	1191	3e-157	PREDICTED: phosphatidylinositol 4-phosphate 5-kinase 7 isoform X2 [Camelina sativa]	sp|Q9SUI2|PI5K7_ARATH	454	E:2e-153	RecName: Full=Phosphatidylinositol 4-phosphate 5-kinase 7;^Eukaryota; Viridiplantae; Streptophyta; Embryophyta; Tracheophyta; Spermatophyta; Magnoliophyta; eudicotyledons; core eudicotyledons; rosids; malvids; Brassicales; Brassicaceae; Camelineae; Arabidopsis`sp|Q9SUI2|PI5K7_ARATH	sp|Q9SUI2|PI5K7_ARATH	469	E:9e-160	RecName: Full=Phosphatidylinositol 4-phosphate 5-kinase 7;^Eukaryota; Viridiplantae; Streptophyta; Embryophyta; Tracheophyta; Spermatophyta; Magnoliophyta; eudicotyledons; core eudicotyledons; rosids; malvids; Brassicales; Brassicaceae; Camelineae; Arabidopsis`sp|Q9SUI2|PI5K7_ARATH	PF02493.15	MORN	MORN repeat	COG4642	Uncharacterized protein conserved in bacteria	.	c38356_g1|m.953	2-829[+]	.	.	GO:0046854|phosphatidylinositol phosphorylation	GO:0016308|1-phosphatidylinositol-4-phosphate 5-kinase activity;GO:0005524|ATP binding	GO:0005886|plasma membrane	K00889|PIP5K; 1-phosphatidylinositol-4-phosphate 5-kinase [EC:2.7.1.68]	map00562|Inositol phosphate metabolism;map04144|Endocytosis;map04070|Phosphatidylinositol signaling system;map05231|Choline metabolism in cancer;map01100|Metabolic pathways;map04666|Fc gamma R-mediated phagocytosis;map04810|Regulation of actin cytoskeleton
c47100_g1	33.6595	5.07294	0.000627987	0.0116656	up	yes	gi|328349772|emb|FR839628.1|	36	3e-08	Pichia pastoris CBS 7435 chromosome 1, complete replicon sequence	gi|545707184|ref|XP_005705907.1|	541	4e-66	60S ribosomal protein L9e [Galdieria sulphuraria]	sp|P49210|RL9_ORYSJ	204	E:6e-64	RecName: Full=60S ribosomal protein L9;^Eukaryota; Viridiplantae; Streptophyta; Embryophyta; Tracheophyta; Spermatophyta; Magnoliophyta; Liliopsida; Poales; Poaceae; BEP clade; Ehrhartoideae; Oryzeae; Oryza	sp|P49210|RL9_ORYSJ	219	E:2e-70	RecName: Full=60S ribosomal protein L9;^Eukaryota; Viridiplantae; Streptophyta; Embryophyta; Tracheophyta; Spermatophyta; Magnoliophyta; Liliopsida; Poales; Poaceae; BEP clade; Ehrhartoideae; Oryzeae; Oryza	PF00347.18	Ribosomal_L6	Ribosomal protein L6	COG0097	Ribosomal protein L6P/L9E	.	c47100_g1|m.2085	2-604[+]	.	.	GO:0009955|adaxial/abaxial pattern specification;GO:0006412|translation	GO:0019843|rRNA binding;GO:0003735|structural constituent of ribosome	GO:0009941|chloroplast envelope;GO:0022625|cytosolic large ribosomal subunit;GO:0005730|nucleolus;GO:0005886|plasma membrane;GO:0005773|vacuole	K02940|RP-L9e, RPL9; large subunit ribosomal protein L9e	map03010|Ribosome
c39632_g1	2.06193	1.044	0.000338077	0.00783239	up	yes	gi|567127222|ref|XM_006391683.1|	2178	0	Eutrema salsugineum hypothetical protein (EUTSA_v10023234mg) mRNA, complete cds	gi|565485497|ref|XP_006300388.1|	4809	0	hypothetical protein CARUB_v10019713mg, partial [Capsella rubella]	sp|Q9SH30|HMA5_ARATH	1829	E:0	RecName: Full=Putative copper-transporting ATPase HMA5;^Eukaryota; Viridiplantae; Streptophyta; Embryophyta; Tracheophyta; Spermatophyta; Magnoliophyta; eudicotyledons; core eudicotyledons; rosids; malvids; Brassicales; Brassicaceae; Camelineae; Arabidopsis	sp|Q9SH30|HMA5_ARATH	1875	E:0	RecName: Full=Putative copper-transporting ATPase HMA5;^Eukaryota; Viridiplantae; Streptophyta; Embryophyta; Tracheophyta; Spermatophyta; Magnoliophyta; eudicotyledons; core eudicotyledons; rosids; malvids; Brassicales; Brassicaceae; Camelineae; Arabidopsis	PF00403.21	HMA	Heavy-metal-associated domain	COG2217	Cation transport ATPase	.	c39632_g1|m.2907	234-3215[-]	.	ExpAA=171.81^PredHel=8^Topology=i299-321o336-358i371-393o403-420i563-582o602-621i920-942o952-971i	GO:0006754|ATP biosynthetic process;GO:0060003|copper ion export;GO:0010273|detoxification of copper ion	GO:0005524|ATP binding;GO:0005507|copper ion binding;GO:0004008|copper-exporting ATPase activity	GO:0016021|integral to membrane	K17686|copA, ATP7; Cu+-exporting ATPase [EC:3.6.3.54]	.
c46714_g1	9.77368	3.2889	1.97716e-08	7.74057e-06	up	yes	gi|297829497|ref|XM_002882585.1|	439	0	Arabidopsis lyrata subsp. lyrata hypothetical protein, mRNA	gi|567201276|ref|XP_006407656.1|	991	8e-130	hypothetical protein EUTSA_v10021381mg [Eutrema salsugineum]	sp|Q1PER6|APX2_ARATH	377	E:7e-128	RecName: Full=L-ascorbate peroxidase 2, cytosolic;^Eukaryota; Viridiplantae; Streptophyta; Embryophyta; Tracheophyta; Spermatophyta; Magnoliophyta; eudicotyledons; core eudicotyledons; rosids; malvids; Brassicales; Brassicaceae; Camelineae; Arabidopsis`sp|Q1PER6|APX2_ARATH	sp|Q1PER6|APX2_ARATH	378	E:4e-132	RecName: Full=L-ascorbate peroxidase 2, cytosolic;^Eukaryota; Viridiplantae; Streptophyta; Embryophyta; Tracheophyta; Spermatophyta; Magnoliophyta; eudicotyledons; core eudicotyledons; rosids; malvids; Brassicales; Brassicaceae; Camelineae; Arabidopsis	PF00141.18	peroxidase	Peroxidase	COG0376	Catalase (peroxidase I)	.	c46714_g1|m.2995	677-1252[-]	.	.	GO:0042744|hydrogen peroxide catabolic process;GO:0006979|response to oxidative stress	GO:0020037|heme binding;GO:0016688|L-ascorbate peroxidase activity;GO:0046872|metal ion binding	GO:0005829|cytosol	K00434|E1.11.1.11; L-ascorbate peroxidase [EC:1.11.1.11]	map00053|Ascorbate and aldarate metabolism;map00480|Glutathione metabolism
c52885_g3	5.98299	2.58087	0.00447233	0.0416235	up	yes	gi|567133627|ref|XM_006393222.1|	446	0	Eutrema salsugineum hypothetical protein (EUTSA_v10011772mg) mRNA, complete cds	gi|727578183|ref|XP_010461760.1|	752	2e-97	PREDICTED: RING-H2 finger protein ATL78 [Camelina sativa]	sp|Q6NQG7|ATL78_ARATH	280	E:3e-93	RecName: Full=RING-H2 finger protein ATL78;^Eukaryota; Viridiplantae; Streptophyta; Embryophyta; Tracheophyta; Spermatophyta; Magnoliophyta; eudicotyledons; core eudicotyledons; rosids; malvids; Brassicales; Brassicaceae; Camelineae; Arabidopsis	sp|Q6NQG7|ATL78_ARATH	315	E:3e-108	RecName: Full=RING-H2 finger protein ATL78;^Eukaryota; Viridiplantae; Streptophyta; Embryophyta; Tracheophyta; Spermatophyta; Magnoliophyta; eudicotyledons; core eudicotyledons; rosids; malvids; Brassicales; Brassicaceae; Camelineae; Arabidopsis	PF12678.2	zf-rbx1	RING-H2 zinc finger	COG5540	RING-finger-containing ubiquitin ligase	.	c52885_g3|m.3343	238-750[-]	.	ExpAA=21.64^PredHel=1^Topology=i7-29o	GO:0016567|protein ubiquitination	GO:0046872|metal ion binding;GO:0008270|zinc ion binding	GO:0016021|integral to membrane	K19040|ATL76S; E3 ubiquitin-protein ligase ATL10/75/76/77/78 [EC:2.3.2.27]	.
c48864_g1	2.52666	1.33723	0.0027367	0.0303592	up	yes	gi|297849457|ref|XM_002892564.1|	1628	0	Arabidopsis lyrata subsp. lyrata DNA helicase, mRNA	gi|30681987|ref|NP_172562.2|	4389	0	ATP-dependent DNA helicase Q-like 4A [Arabidopsis thaliana]	sp|Q8L840|RQL4A_ARATH	1695	E:0	RecName: Full=ATP-dependent DNA helicase Q-like 4A;^Eukaryota; Viridiplantae; Streptophyta; Embryophyta; Tracheophyta; Spermatophyta; Magnoliophyta; eudicotyledons; core eudicotyledons; rosids; malvids; Brassicales; Brassicaceae; Camelineae; Arabidopsis`sp|Q8L840|RQL4A_ARATH	sp|Q8L840|RQL4A_ARATH	1373	E:0	RecName: Full=ATP-dependent DNA helicase Q-like 4A;^Eukaryota; Viridiplantae; Streptophyta; Embryophyta; Tracheophyta; Spermatophyta; Magnoliophyta; eudicotyledons; core eudicotyledons; rosids; malvids; Brassicales; Brassicaceae; Camelineae; Arabidopsis	PF00270.24	DEAD	DEAD/DEAH box helicase	COG0514	Superfamily II DNA helicase	.	c48864_g1|m.3440	1789-4137[-]	.	.	GO:0071215|cellular response to abscisic acid stimulus;GO:0070417|cellular response to cold;GO:0051276|chromosome organization;GO:0006260|DNA replication;GO:0000724|double-strand break repair via homologous recombination	GO:0043138|3'-5' DNA helicase activity;GO:0005524|ATP binding;GO:0043140|ATP-dependent 3'-5' DNA helicase activity;GO:0046872|metal ion binding;GO:0003676|nucleic acid binding	GO:0005634|nucleus;GO:0009506|plasmodesma	K10901|BLM, RECQL3, SGS1; bloom syndrome protein [EC:3.6.4.12]	map03440|Homologous recombination;map03460|Fanconi anemia pathway
c48864_g1	2.52666	1.33723	0.0027367	0.0303592	up	yes	gi|297849457|ref|XM_002892564.1|	1628	0	Arabidopsis lyrata subsp. lyrata DNA helicase, mRNA	gi|30681987|ref|NP_172562.2|	4389	0	ATP-dependent DNA helicase Q-like 4A [Arabidopsis thaliana]	sp|Q8L840|RQL4A_ARATH	1695	E:0	RecName: Full=ATP-dependent DNA helicase Q-like 4A;^Eukaryota; Viridiplantae; Streptophyta; Embryophyta; Tracheophyta; Spermatophyta; Magnoliophyta; eudicotyledons; core eudicotyledons; rosids; malvids; Brassicales; Brassicaceae; Camelineae; Arabidopsis`sp|Q8L840|RQL4A_ARATH	sp|Q8L840|RQL4A_ARATH	506	E:9e-169	RecName: Full=ATP-dependent DNA helicase Q-like 4A;^Eukaryota; Viridiplantae; Streptophyta; Embryophyta; Tracheophyta; Spermatophyta; Magnoliophyta; eudicotyledons; core eudicotyledons; rosids; malvids; Brassicales; Brassicaceae; Camelineae; Arabidopsis	PF09382.5	RQC	RQC domain	COG0514	Superfamily II DNA helicase	.	c48864_g1|m.3441	811-1737[-]	.	.	GO:0071215|cellular response to abscisic acid stimulus;GO:0070417|cellular response to cold;GO:0051276|chromosome organization;GO:0006260|DNA replication;GO:0000724|double-strand break repair via homologous recombination	GO:0043138|3'-5' DNA helicase activity;GO:0005524|ATP binding;GO:0043140|ATP-dependent 3'-5' DNA helicase activity;GO:0046872|metal ion binding;GO:0003676|nucleic acid binding	GO:0005634|nucleus;GO:0009506|plasmodesma	K10901|BLM, RECQL3, SGS1; bloom syndrome protein [EC:3.6.4.12]	map03440|Homologous recombination;map03460|Fanconi anemia pathway
c49124_g1	0.326685	-1.61403	0.00124874	0.0181083	down	yes	gi|332189094|gb|CP002684.1|	887	0	Arabidopsis thaliana chromosome 1 sequence	gi|567155542|ref|XP_006418105.1|	1164	2e-152	hypothetical protein EUTSA_v10009297mg [Eutrema salsugineum]	sp|Q9SXP7|LIPB_ARATH	449	E:2e-152	RecName: Full=Octanoyltransferase;^Eukaryota; Viridiplantae; Streptophyta; Embryophyta; Tracheophyta; Spermatophyta; Magnoliophyta; eudicotyledons; core eudicotyledons; rosids; malvids; Brassicales; Brassicaceae; Camelineae; Arabidopsis	sp|Q9SXP7|LIPB_ARATH	450	E:6e-160	RecName: Full=Octanoyltransferase;^Eukaryota; Viridiplantae; Streptophyta; Embryophyta; Tracheophyta; Spermatophyta; Magnoliophyta; eudicotyledons; core eudicotyledons; rosids; malvids; Brassicales; Brassicaceae; Camelineae; Arabidopsis	PF03099.14	BPL_LplA_LipB	Biotin/lipoate A/B protein ligase family	COG0321	Lipoate-protein ligase B	.	c49124_g1|m.3621	1243-1971[+]	.	.	GO:0009107|lipoate biosynthetic process;GO:0009106|lipoate metabolic process;GO:0009249|protein lipoylation	GO:0033819|lipoyl(octanoyl) transferase activity;GO:0017118|lipoyltransferase activity;GO:0016415|octanoyltransferase activity	GO:0005739|mitochondrion	K03801|lipB; lipoyl(octanoyl) transferase [EC:2.3.1.181]	map00785|Lipoic acid metabolism;map01100|Metabolic pathways
c49124_g1	0.326685	-1.61403	0.00124874	0.0181083	down	yes	gi|332189094|gb|CP002684.1|	887	0	Arabidopsis thaliana chromosome 1 sequence	gi|567155542|ref|XP_006418105.1|	1164	2e-152	hypothetical protein EUTSA_v10009297mg [Eutrema salsugineum]	sp|Q9SXP7|LIPB_ARATH	449	E:2e-152	RecName: Full=Octanoyltransferase;^Eukaryota; Viridiplantae; Streptophyta; Embryophyta; Tracheophyta; Spermatophyta; Magnoliophyta; eudicotyledons; core eudicotyledons; rosids; malvids; Brassicales; Brassicaceae; Camelineae; Arabidopsis	sp|Q6AWV1|POP5_ARATH	282	E:1e-96	RecName: Full=Probable ribonuclease P/MRP protein subunit POP5;^Eukaryota; Viridiplantae; Streptophyta; Embryophyta; Tracheophyta; Spermatophyta; Magnoliophyta; eudicotyledons; core eudicotyledons; rosids; malvids; Brassicales; Brassicaceae; Camelineae; Arabidopsis	PF01900.14	RNase_P_Rpp14	Rpp14/Pop5 family	COG1369	RNase P/RNase MRP subunit POP5	.	c49124_g1|m.3622	3-488[+]	.	.	GO:0008033|tRNA processing	GO:0004526|ribonuclease P activity	GO:0005730|nucleolus;GO:0005773|vacuole	K03801|lipB; lipoyl(octanoyl) transferase [EC:2.3.1.181]	map00785|Lipoic acid metabolism;map01100|Metabolic pathways
c52834_g3	2.79108	1.48083	0.000994608	0.0156766	up	yes	gi|443609448|dbj|AB778564.1|	1702	0	Arabidopsis thaliana AT4G32640 mRNA for Sec24-like transport protein, complete cds, ecotype: Columbia	gi|443609449|dbj|BAM76809.1|	2994	0	Sec24-like transport protein [Arabidopsis thaliana]	sp|Q9M081|SC24B_ARATH	1125	E:0	RecName: Full=Protein transport protein Sec24-like At4g32640;^Eukaryota; Viridiplantae; Streptophyta; Embryophyta; Tracheophyta; Spermatophyta; Magnoliophyta; eudicotyledons; core eudicotyledons; rosids; malvids; Brassicales; Brassicaceae; Camelineae; Arabidopsis	sp|Q9M081|SC24B_ARATH	1416	E:0	RecName: Full=Protein transport protein Sec24-like At4g32640;^Eukaryota; Viridiplantae; Streptophyta; Embryophyta; Tracheophyta; Spermatophyta; Magnoliophyta; eudicotyledons; core eudicotyledons; rosids; malvids; Brassicales; Brassicaceae; Camelineae; Arabidopsis	PF04810.10	zf-Sec23_Sec24	Sec23/Sec24 zinc finger	COG5028	Vesicle coat complex COPII, subunit SEC24/subunit SFB2/subunit SFB3	.	c52834_g3|m.4322	1-2514[-]	.	.	GO:0006888|ER to Golgi vesicle-mediated transport;GO:0006886|intracellular protein transport	GO:0008270|zinc ion binding	GO:0030127|COPII vesicle coat;GO:0005789|endoplasmic reticulum membrane;GO:0033116|endoplasmic reticulum-Golgi intermediate compartment membrane;GO:0000139|Golgi membrane	K14007|SEC24; protein transport protein SEC24	map04141|Protein processing in endoplasmic reticulum
c4404_g1	8.72602	3.12532	0.00129463	0.0185783	up	yes	gi|297830533|ref|XM_002883103.1|	449	0	Arabidopsis lyrata subsp. lyrata hypothetical protein, mRNA	gi|565484404|ref|XP_006299842.1|	741	7e-93	hypothetical protein CARUB_v10016045mg [Capsella rubella]	sp|Q6NQG7|ATL78_ARATH	209	E:4e-63	RecName: Full=RING-H2 finger protein ATL78;^Eukaryota; Viridiplantae; Streptophyta; Embryophyta; Tracheophyta; Spermatophyta; Magnoliophyta; eudicotyledons; core eudicotyledons; rosids; malvids; Brassicales; Brassicaceae; Camelineae; Arabidopsis	sp|Q6NQG7|ATL78_ARATH	261	E:1e-86	RecName: Full=RING-H2 finger protein ATL78;^Eukaryota; Viridiplantae; Streptophyta; Embryophyta; Tracheophyta; Spermatophyta; Magnoliophyta; eudicotyledons; core eudicotyledons; rosids; malvids; Brassicales; Brassicaceae; Camelineae; Arabidopsis	PF12678.2	zf-rbx1	RING-H2 zinc finger	COG5540	RING-finger-containing ubiquitin ligase	.	c4404_g1|m.5045	114-764[+]	.	ExpAA=22.42^PredHel=1^Topology=i54-76o	GO:0016567|protein ubiquitination	GO:0046872|metal ion binding;GO:0008270|zinc ion binding	GO:0016021|integral to membrane	K19040|ATL76S; E3 ubiquitin-protein ligase ATL10/75/76/77/78 [EC:2.3.2.27]	.
c50437_g2	2.10516	1.07393	0.00297319	0.0319043	up	yes	gi|297802709|ref|XM_002869193.1|	646	0	Arabidopsis lyrata subsp. lyrata poly(A) polymerase, mRNA	gi|565441396|ref|XP_006283159.1|	2746	0	hypothetical protein CARUB_v10004188mg [Capsella rubella]	sp|Q54J73|PAP_DICDI	344	E:9e-101	RecName: Full=Poly(A) polymerase;^Eukaryota; Amoebozoa; Mycetozoa; Dictyosteliida; Dictyostelium`sp|Q54J73|PAP_DICDI	sp|Q9BWT3|PAPOG_HUMAN	251	E:1e-76	RecName: Full=Poly(A) polymerase gamma;^Eukaryota; Metazoa; Chordata; Craniata; Vertebrata; Euteleostomi; Mammalia; Eutheria; Euarchontoglires; Primates; Haplorrhini; Catarrhini; Hominidae; Homo	PF04928.12	PAP_central	Poly(A) polymerase central domain	COG5186	Poly(A) polymerase	.	c50437_g2|m.6353	1040-1732[+]	.	.	GO:0006397|mRNA processing;GO:0043631|RNA polyadenylation;GO:0006351|transcription, DNA-dependent	GO:0005524|ATP binding;GO:0046872|metal ion binding;GO:0004652|polynucleotide adenylyltransferase activity;GO:0003723|RNA binding	GO:0005634|nucleus	K14376|PAP; poly(A) polymerase [EC:2.7.7.19]	map03015|mRNA surveillance pathway
c50437_g2	2.10516	1.07393	0.00297319	0.0319043	up	yes	gi|297802709|ref|XM_002869193.1|	646	0	Arabidopsis lyrata subsp. lyrata poly(A) polymerase, mRNA	gi|565441396|ref|XP_006283159.1|	2746	0	hypothetical protein CARUB_v10004188mg [Capsella rubella]	sp|Q54J73|PAP_DICDI	344	E:9e-101	RecName: Full=Poly(A) polymerase;^Eukaryota; Amoebozoa; Mycetozoa; Dictyosteliida; Dictyostelium`sp|Q54J73|PAP_DICDI	sp|Q54J73|PAP_DICDI	99.8	E:2e-23	RecName: Full=Poly(A) polymerase;^Eukaryota; Amoebozoa; Mycetozoa; Dictyosteliida; Dictyostelium	PF04928.12	PAP_central	Poly(A) polymerase central domain	COG5186	Poly(A) polymerase	.	c50437_g2|m.6354	421-801[+]	.	.	GO:0006378|mRNA polyadenylation;GO:0006351|transcription, DNA-dependent	GO:0005524|ATP binding;GO:0046872|metal ion binding;GO:0004652|polynucleotide adenylyltransferase activity;GO:0003723|RNA binding	GO:0005847|mRNA cleavage and polyadenylation specificity factor complex	K14376|PAP; poly(A) polymerase [EC:2.7.7.19]	map03015|mRNA surveillance pathway
c50437_g2	2.10516	1.07393	0.00297319	0.0319043	up	yes	gi|297802709|ref|XM_002869193.1|	646	0	Arabidopsis lyrata subsp. lyrata poly(A) polymerase, mRNA	gi|565441396|ref|XP_006283159.1|	2746	0	hypothetical protein CARUB_v10004188mg [Capsella rubella]	sp|Q54J73|PAP_DICDI	344	E:9e-101	RecName: Full=Poly(A) polymerase;^Eukaryota; Amoebozoa; Mycetozoa; Dictyosteliida; Dictyostelium`sp|Q54J73|PAP_DICDI	sp|Q54J73|PAP_DICDI	58.5	E:4e-08	RecName: Full=Poly(A) polymerase;^Eukaryota; Amoebozoa; Mycetozoa; Dictyosteliida; Dictyostelium	PF04926.10	PAP_RNA-bind	Poly(A) polymerase predicted RNA binding domain	COG5186	Poly(A) polymerase	.	c50437_g2|m.6352	1799-2872[+]	.	.	GO:0006378|mRNA polyadenylation;GO:0006351|transcription, DNA-dependent	GO:0005524|ATP binding;GO:0046872|metal ion binding;GO:0004652|polynucleotide adenylyltransferase activity;GO:0003723|RNA binding	GO:0005847|mRNA cleavage and polyadenylation specificity factor complex	K14376|PAP; poly(A) polymerase [EC:2.7.7.19]	map03015|mRNA surveillance pathway
c52836_g1	9.15923	3.19523	5.58124e-05	0.00235979	up	yes	gi|567133222|ref|XM_006393108.1|	2808	0	Eutrema salsugineum hypothetical protein (EUTSA_v10011182mg) mRNA, complete cds	gi|567133223|ref|XP_006393170.1|	5828	0	hypothetical protein EUTSA_v10011182mg [Eutrema salsugineum]	sp|Q2QAV0|TIO_ARATH	2120	E:0	RecName: Full=Serine/threonine-protein kinase TIO;^Eukaryota; Viridiplantae; Streptophyta; Embryophyta; Tracheophyta; Spermatophyta; Magnoliophyta; eudicotyledons; core eudicotyledons; rosids; malvids; Brassicales; Brassicaceae; Camelineae; Arabidopsis	sp|Q2QAV0|TIO_ARATH	2223	E:0	RecName: Full=Serine/threonine-protein kinase TIO;^Eukaryota; Viridiplantae; Streptophyta; Embryophyta; Tracheophyta; Spermatophyta; Magnoliophyta; eudicotyledons; core eudicotyledons; rosids; malvids; Brassicales; Brassicaceae; Camelineae; Arabidopsis	PF00069.20	Pkinase	Protein kinase domain	COG0515	Serine/threonine protein kinase	.	c52836_g1|m.6653	1-3729[-]	.	.	GO:0000911|cytokinesis by cell plate formation;GO:0009558|embryo sac cellularization	GO:0005524|ATP binding;GO:0004674|protein serine/threonine kinase activity	GO:0005856|cytoskeleton;GO:0009524|phragmoplast	K06228|FU; fused [EC:2.7.11.1]	map04340|Hedgehog signaling pathway;map05217|Basal cell carcinoma;map05200|Pathways in cancer
c50407_g1	10.6755	3.41623	0.00369392	0.0366033	up	yes	gi|567202681|ref|XM_006407972.1|	1299	0	Eutrema salsugineum hypothetical protein (EUTSA_v10020334mg) mRNA, complete cds	gi|727582411|ref|XP_010464122.1|	2915	0	PREDICTED: LOW QUALITY PROTEIN: ATP-dependent DNA helicase Q-like 1 [Camelina sativa]	sp|Q9FT74|RQL1_ARATH	1119	E:0	RecName: Full=ATP-dependent DNA helicase Q-like 1;^Eukaryota; Viridiplantae; Streptophyta; Embryophyta; Tracheophyta; Spermatophyta; Magnoliophyta; eudicotyledons; core eudicotyledons; rosids; malvids; Brassicales; Brassicaceae; Camelineae; Arabidopsis	sp|Q9FT74|RQL1_ARATH	1140	E:0	RecName: Full=ATP-dependent DNA helicase Q-like 1;^Eukaryota; Viridiplantae; Streptophyta; Embryophyta; Tracheophyta; Spermatophyta; Magnoliophyta; eudicotyledons; core eudicotyledons; rosids; malvids; Brassicales; Brassicaceae; Camelineae; Arabidopsis	PF00270.24	DEAD	DEAD/DEAH box helicase	COG0514	Superfamily II DNA helicase	.	c50407_g1|m.7110	166-2055[-]	.	.	GO:0070417|cellular response to cold;GO:0042631|cellular response to water deprivation;GO:0006310|DNA recombination	GO:0005524|ATP binding;GO:0008026|ATP-dependent helicase activity;GO:0046872|metal ion binding;GO:0003676|nucleic acid binding	GO:0005634|nucleus	K10901|BLM, RECQL3, SGS1; bloom syndrome protein [EC:3.6.4.12]	map03440|Homologous recombination;map03460|Fanconi anemia pathway
c45420_g1	0.20982	-2.25277	0.00197298	0.0242636	down	yes	gi|567214021|ref|XM_006410966.1|	658	0	Eutrema salsugineum hypothetical protein (EUTSA_v10016571mg) mRNA, complete cds	gi|685305360|ref|XP_009143404.1|	1477	0	PREDICTED: ammonium transporter 2 [Brassica rapa]	sp|Q9M6N7|AMT2_ARATH	525	E:0	RecName: Full=Ammonium transporter 2;^Eukaryota; Viridiplantae; Streptophyta; Embryophyta; Tracheophyta; Spermatophyta; Magnoliophyta; eudicotyledons; core eudicotyledons; rosids; malvids; Brassicales; Brassicaceae; Camelineae; Arabidopsis`sp|Q9M6N7|AMT2_ARATH	sp|Q9M6N7|AMT2_ARATH	537	E:0	RecName: Full=Ammonium transporter 2;^Eukaryota; Viridiplantae; Streptophyta; Embryophyta; Tracheophyta; Spermatophyta; Magnoliophyta; eudicotyledons; core eudicotyledons; rosids; malvids; Brassicales; Brassicaceae; Camelineae; Arabidopsis	PF00909.16	Ammonium_transp	Ammonium Transporter Family	COG0004	Ammonia permease	.	c45420_g1|m.7803	2-976[+]	.	ExpAA=167.43^PredHel=8^Topology=o28-50i63-85o135-157i164-186o201-220i233-252o267-289i301-323o	GO:0009624|response to nematode	GO:0015398|high affinity secondary active ammonium transmembrane transporter activity	GO:0016021|integral to membrane;GO:0005886|plasma membrane;GO:0009506|plasmodesma	K03320|amt, AMT, MEP; ammonium transporter, Amt family	.
c45420_g1	0.20982	-2.25277	0.00197298	0.0242636	down	yes	gi|567214021|ref|XM_006410966.1|	658	0	Eutrema salsugineum hypothetical protein (EUTSA_v10016571mg) mRNA, complete cds	gi|685305360|ref|XP_009143404.1|	1477	0	PREDICTED: ammonium transporter 2 [Brassica rapa]	sp|Q9M6N7|AMT2_ARATH	525	E:0	RecName: Full=Ammonium transporter 2;^Eukaryota; Viridiplantae; Streptophyta; Embryophyta; Tracheophyta; Spermatophyta; Magnoliophyta; eudicotyledons; core eudicotyledons; rosids; malvids; Brassicales; Brassicaceae; Camelineae; Arabidopsis`sp|Q9M6N7|AMT2_ARATH	sp|Q9M6N7|AMT2_ARATH	243	E:1e-77	RecName: Full=Ammonium transporter 2;^Eukaryota; Viridiplantae; Streptophyta; Embryophyta; Tracheophyta; Spermatophyta; Magnoliophyta; eudicotyledons; core eudicotyledons; rosids; malvids; Brassicales; Brassicaceae; Camelineae; Arabidopsis	PF00909.16	Ammonium_transp	Ammonium Transporter Family	COG0004	Ammonia permease	.	c45420_g1|m.7805	1353-1727[+]	.	ExpAA=23.40^PredHel=1^Topology=o36-58i	GO:0009624|response to nematode	GO:0015398|high affinity secondary active ammonium transmembrane transporter activity	GO:0016021|integral to membrane;GO:0005886|plasma membrane;GO:0009506|plasmodesma	K03320|amt, AMT, MEP; ammonium transporter, Amt family	.
c52324_g2	15.8952	3.99052	3.42882e-08	1.16694e-05	up	yes	gi|330250293|gb|CP002685.1|	362	0	Arabidopsis thaliana chromosome 2, complete sequence	gi|565473906|ref|XP_006294594.1|	690	2e-79	hypothetical protein CARUB_v10023630mg [Capsella rubella]	sp|Q9SID0|SCRK1_ARATH	266	E:3e-79	RecName: Full=Probable fructokinase-1;^Eukaryota; Viridiplantae; Streptophyta; Embryophyta; Tracheophyta; Spermatophyta; Magnoliophyta; eudicotyledons; core eudicotyledons; rosids; malvids; Brassicales; Brassicaceae; Camelineae; Arabidopsis`sp|Q9SID0|SCRK1_ARATH	sp|Q9SID0|SCRK1_ARATH	186	E:1e-57	RecName: Full=Probable fructokinase-1;^Eukaryota; Viridiplantae; Streptophyta; Embryophyta; Tracheophyta; Spermatophyta; Magnoliophyta; eudicotyledons; core eudicotyledons; rosids; malvids; Brassicales; Brassicaceae; Camelineae; Arabidopsis	PF00294.19	PfkB	pfkB family carbohydrate kinase	COG0524	Sugar kinases, ribokinase family	.	c52324_g2|m.8274	1800-2108[+]	.	.	GO:0006014|D-ribose metabolic process;GO:0019252|starch biosynthetic process	GO:0005524|ATP binding;GO:0008865|fructokinase activity;GO:0004747|ribokinase activity	GO:0005829|cytosol;GO:0005886|plasma membrane	K00847|E2.7.1.4, scrK; fructokinase [EC:2.7.1.4]	map01100|Metabolic pathways;map00500|Starch and sucrose metabolism;map00051|Fructose and mannose metabolism;map00520|Amino sugar and nucleotide sugar metabolism
c52324_g2	15.8952	3.99052	3.42882e-08	1.16694e-05	up	yes	gi|330250293|gb|CP002685.1|	362	0	Arabidopsis thaliana chromosome 2, complete sequence	gi|565473906|ref|XP_006294594.1|	690	2e-79	hypothetical protein CARUB_v10023630mg [Capsella rubella]	sp|Q9SID0|SCRK1_ARATH	266	E:3e-79	RecName: Full=Probable fructokinase-1;^Eukaryota; Viridiplantae; Streptophyta; Embryophyta; Tracheophyta; Spermatophyta; Magnoliophyta; eudicotyledons; core eudicotyledons; rosids; malvids; Brassicales; Brassicaceae; Camelineae; Arabidopsis`sp|Q9SID0|SCRK1_ARATH	sp|Q9SID0|SCRK1_ARATH	264	E:2e-87	RecName: Full=Probable fructokinase-1;^Eukaryota; Viridiplantae; Streptophyta; Embryophyta; Tracheophyta; Spermatophyta; Magnoliophyta; eudicotyledons; core eudicotyledons; rosids; malvids; Brassicales; Brassicaceae; Camelineae; Arabidopsis	PF00294.19	PfkB	pfkB family carbohydrate kinase	COG0524	Sugar kinases, ribokinase family	.	c52324_g2|m.8273	315-749[+]	.	.	GO:0006014|D-ribose metabolic process;GO:0019252|starch biosynthetic process	GO:0005524|ATP binding;GO:0008865|fructokinase activity;GO:0004747|ribokinase activity	GO:0005829|cytosol;GO:0005886|plasma membrane	K00847|E2.7.1.4, scrK; fructokinase [EC:2.7.1.4]	map01100|Metabolic pathways;map00500|Starch and sucrose metabolism;map00051|Fructose and mannose metabolism;map00520|Amino sugar and nucleotide sugar metabolism
c51470_g1	2.16741	1.11597	0.000500093	0.0101039	up	yes	gi|567154384|ref|XM_006417700.1|	2539	0	Eutrema salsugineum hypothetical protein (EUTSA_v10006641mg) mRNA, complete cds	gi|565497970|ref|XP_006306624.1|	5414	0	hypothetical protein CARUB_v10008142mg, partial [Capsella rubella]	sp|Q9XES1|ECA4_ARATH	2068	E:0	RecName: Full=Calcium-transporting ATPase 4, endoplasmic reticulum-type;^Eukaryota; Viridiplantae; Streptophyta; Embryophyta; Tracheophyta; Spermatophyta; Magnoliophyta; eudicotyledons; core eudicotyledons; rosids; malvids; Brassicales; Brassicaceae; Camelineae; Arabidopsis	sp|Q9XES1|ECA4_ARATH	2068	E:0	RecName: Full=Calcium-transporting ATPase 4, endoplasmic reticulum-type;^Eukaryota; Viridiplantae; Streptophyta; Embryophyta; Tracheophyta; Spermatophyta; Magnoliophyta; eudicotyledons; core eudicotyledons; rosids; malvids; Brassicales; Brassicaceae; Camelineae; Arabidopsis	PF00690.21	Cation_ATPase_N	Cation transporter/ATPase, N-terminus	COG0474	Cation transport ATPase	.	c51470_g1|m.9141	3-3263[+]	.	ExpAA=183.00^PredHel=8^Topology=i106-123o133-155i252-274o307-329i349-371o886-908i1010-1032o1036-1058i	.	GO:0005524|ATP binding;GO:0005388|calcium-transporting ATPase activity;GO:0046872|metal ion binding	GO:0005783|endoplasmic reticulum;GO:0016021|integral to membrane;GO:0005886|plasma membrane	K01537|E3.6.3.8; Ca2+-transporting ATPase [EC:3.6.3.8]	map04742|Taste transduction;map00230|Purine metabolism
c43955_g1	0.442777	-1.17535	0.00121341	0.0177737	down	yes	gi|79325526|ref|NM_001036672.1|	422	0	Arabidopsis thaliana probable acyl-[acyl-carrier-protein]--UDP-N-acetylglucosamine O-acyltransferase mRNA, complete cds	gi|727513516|ref|XP_010433085.1|	862	5e-138	PREDICTED: probable acyl-[acyl-carrier-protein]--UDP-N-acetylglucosamine O-acyltransferase, mitochondrial [Camelina sativa]	sp|B5YHC0|LPXA_THEYD	137	E:5e-35	RecName: Full=Acyl-[acyl-carrier-protein]--UDP-N-acetylglucosamine O-acyltransferase;^Bacteria; Nitrospirae; Nitrospirales; Nitrospiraceae; Thermodesulfovibrio`sp|B5YHC0|LPXA_THEYD	sp|B5F9W4|LPXA_VIBFM	127	E:1e-34	RecName: Full=Acyl-[acyl-carrier-protein]--UDP-N-acetylglucosamine O-acyltransferase;^Bacteria; Proteobacteria; Gammaproteobacteria; Vibrionales; Vibrionaceae; Aliivibrio	PF00132.19	Hexapep	Bacterial transferase hexapeptide (six repeats)	COG1043	Acyl-[acyl carrier protein]--UDP-N-acetylglucosamine O-acyltransferase	.	c43955_g1|m.9534	956-1447[+]	.	.	GO:0009245|lipid A biosynthetic process	GO:0008780|acyl-[acyl-carrier-protein]-UDP-N-acetylglucosamine O-acyltransferase activity	GO:0005737|cytoplasm	K00677|lpxA; UDP-N-acetylglucosamine acyltransferase [EC:2.3.1.129]	map00540|Lipopolysaccharide biosynthesis;map01100|Metabolic pathways;map01503|Cationic antimicrobial peptide (CAMP) resistance
c52954_g2	6.97386	2.80196	0.00049647	0.0100648	up	yes	gi|567138431|ref|XM_006394438.1|	1628	0	Eutrema salsugineum hypothetical protein (EUTSA_v10003570mg) mRNA, complete cds	gi|567138432|ref|XP_006394500.1|	3128	0	hypothetical protein EUTSA_v10003570mg [Eutrema salsugineum]	sp|Q9FII5|TDR_ARATH	1171	E:0	RecName: Full=Leucine-rich repeat receptor-like protein kinase TDR;^Eukaryota; Viridiplantae; Streptophyta; Embryophyta; Tracheophyta; Spermatophyta; Magnoliophyta; eudicotyledons; core eudicotyledons; rosids; malvids; Brassicales; Brassicaceae; Camelineae; Arabidopsis	sp|Q9FII5|TDR_ARATH	1369	E:0	RecName: Full=Leucine-rich repeat receptor-like protein kinase TDR;^Eukaryota; Viridiplantae; Streptophyta; Embryophyta; Tracheophyta; Spermatophyta; Magnoliophyta; eudicotyledons; core eudicotyledons; rosids; malvids; Brassicales; Brassicaceae; Camelineae; Arabidopsis	PF08263.7	LRRNT_2	Leucine rich repeat N-terminal domain	COG4886	Leucine-rich repeat (LRR) protein	.	c52954_g2|m.9686	111-2549[+]	sigP:1^27^0.86^YES	ExpAA=42.56^PredHel=2^Topology=i9-28o653-675i	GO:0010067|procambium histogenesis;GO:0010223|secondary shoot formation;GO:0010089|xylem development	GO:0005524|ATP binding;GO:0004674|protein serine/threonine kinase activity	GO:0016021|integral to membrane;GO:0005886|plasma membrane	.	.
c31813_g1	27.269	4.76919	0.000922082	0.0149222	up	yes	gi|448116485|ref|XM_004202997.1|	96	1e-41	Millerozyma farinosa CBS 7064 hypothetical protein (Piso0_000642) mRNA, complete cds	gi|528893339|gb|EPZ33659.1|	1004	2e-134	60S ribosomal protein L8 [Rozella allomycis CSF55]	sp|Q6PBF0|RL8_XENTR	390	E:1e-135	RecName: Full=60S ribosomal protein L8;^Eukaryota; Metazoa; Chordata; Craniata; Vertebrata; Euteleostomi; Amphibia; Batrachia; Anura; Pipoidea; Pipidae; Xenopodinae; Xenopus; Silurana	sp|Q6PBF0|RL8_XENTR	391	E:3e-136	RecName: Full=60S ribosomal protein L8;^Eukaryota; Metazoa; Chordata; Craniata; Vertebrata; Euteleostomi; Amphibia; Batrachia; Anura; Pipoidea; Pipidae; Xenopodinae; Xenopus; Silurana	PF00181.18	Ribosomal_L2	Ribosomal Proteins L2, RNA binding domain	COG0090	Ribosomal protein L2	.	c31813_g1|m.10206	29-805[-]	.	.	GO:0006412|translation	GO:0019843|rRNA binding;GO:0003735|structural constituent of ribosome	GO:0015934|large ribosomal subunit	K02938|RP-L8e, RPL8; large subunit ribosomal protein L8e	map03010|Ribosome
c39561_g1	0.123806	-3.01385	8.9386e-09	3.91128e-06	down	yes	gi|567121704|ref|XM_006390413.1|	279	1e-143	Eutrema salsugineum hypothetical protein (EUTSA_v10018267mg) mRNA, complete cds	gi|222424844|dbj|BAH20374.1|	495	3e-57	AT1G74040 [Arabidopsis thaliana]	sp|Q9C550|LEU12_ARATH	194	E:2e-57	RecName: Full=2-isopropylmalate synthase 2, chloroplastic;^Eukaryota; Viridiplantae; Streptophyta; Embryophyta; Tracheophyta; Spermatophyta; Magnoliophyta; eudicotyledons; core eudicotyledons; rosids; malvids; Brassicales; Brassicaceae; Camelineae; Arabidopsis	sp|Q9C550|LEU12_ARATH	194	E:3e-58	RecName: Full=2-isopropylmalate synthase 2, chloroplastic;^Eukaryota; Viridiplantae; Streptophyta; Embryophyta; Tracheophyta; Spermatophyta; Magnoliophyta; eudicotyledons; core eudicotyledons; rosids; malvids; Brassicales; Brassicaceae; Camelineae; Arabidopsis	PF08502.5	LeuA_dimer	LeuA allosteric (dimerisation) domain	COG0119	Isopropylmalate/homocitrate/citramalate synthases	.	c39561_g1|m.11305	2-319[+]	.	.	GO:0009098|leucine biosynthetic process	GO:0003852|2-isopropylmalate synthase activity;GO:0016829|lyase activity	GO:0009941|chloroplast envelope	K01649|leuA; 2-isopropylmalate synthase [EC:2.3.3.13]	map00620|Pyruvate metabolism;map01210|2-Oxocarboxylic acid metabolism;map01230|Biosynthesis of amino acids;map01110|Biosynthesis of secondary metabolites;map01100|Metabolic pathways;map00290|Valine, leucine and isoleucine biosynthesis
c47168_g1	3.26768	1.70827	0.000844596	0.014128	up	yes	gi|567211113|ref|XM_006410201.1|	1835	0	Eutrema salsugineum hypothetical protein (EUTSA_v10016190mg) mRNA, complete cds	gi|297826573|ref|XP_002881169.1|	3650	0	hypothetical protein ARALYDRAFT_902162 [Arabidopsis lyrata subsp. lyrata]	sp|Q9ZP54|PARP1_ARATH	1406	E:0	RecName: Full=Poly [ADP-ribose] polymerase 1;^Eukaryota; Viridiplantae; Streptophyta; Embryophyta; Tracheophyta; Spermatophyta; Magnoliophyta; eudicotyledons; core eudicotyledons; rosids; malvids; Brassicales; Brassicaceae; Camelineae; Arabidopsis`sp|Q9ZP54|PARP1_ARATH	sp|Q9ZP54|PARP1_ARATH	243	E:1e-74	RecName: Full=Poly [ADP-ribose] polymerase 1;^Eukaryota; Viridiplantae; Streptophyta; Embryophyta; Tracheophyta; Spermatophyta; Magnoliophyta; eudicotyledons; core eudicotyledons; rosids; malvids; Brassicales; Brassicaceae; Camelineae; Arabidopsis	PF00644.15	PARP	Poly(ADP-ribose) polymerase catalytic domain	NOG243963	Hydrolase, hydrolyzing O-glycosyl compounds	.	c47168_g1|m.11498	2801-3172[+]	.	.	GO:0006281|DNA repair;GO:0006471|protein ADP-ribosylation;GO:0009628|response to abiotic stimulus;GO:0009737|response to abscisic acid stimulus;GO:0006979|response to oxidative stress	GO:0003677|DNA binding;GO:0046872|metal ion binding;GO:0051287|NAD binding;GO:0003950|NAD+ ADP-ribosyltransferase activity;GO:0008270|zinc ion binding	GO:0005634|nucleus	K10798|PARP; poly [ADP-ribose] polymerase [EC:2.4.2.30]	map03410|Base excision repair
c47168_g1	3.26768	1.70827	0.000844596	0.014128	up	yes	gi|567211113|ref|XM_006410201.1|	1835	0	Eutrema salsugineum hypothetical protein (EUTSA_v10016190mg) mRNA, complete cds	gi|297826573|ref|XP_002881169.1|	3650	0	hypothetical protein ARALYDRAFT_902162 [Arabidopsis lyrata subsp. lyrata]	sp|Q9ZP54|PARP1_ARATH	1406	E:0	RecName: Full=Poly [ADP-ribose] polymerase 1;^Eukaryota; Viridiplantae; Streptophyta; Embryophyta; Tracheophyta; Spermatophyta; Magnoliophyta; eudicotyledons; core eudicotyledons; rosids; malvids; Brassicales; Brassicaceae; Camelineae; Arabidopsis`sp|Q9ZP54|PARP1_ARATH	sp|Q9ZP54|PARP1_ARATH	1487	E:0	RecName: Full=Poly [ADP-ribose] polymerase 1;^Eukaryota; Viridiplantae; Streptophyta; Embryophyta; Tracheophyta; Spermatophyta; Magnoliophyta; eudicotyledons; core eudicotyledons; rosids; malvids; Brassicales; Brassicaceae; Camelineae; Arabidopsis	PF00645.13	zf-PARP	Poly(ADP-ribose) polymerase and DNA-Ligase Zn-finger region	NOG243963	Hydrolase, hydrolyzing O-glycosyl compounds	.	c47168_g1|m.11496	99-2681[+]	.	.	GO:0006281|DNA repair;GO:0006471|protein ADP-ribosylation;GO:0009628|response to abiotic stimulus;GO:0009737|response to abscisic acid stimulus;GO:0006979|response to oxidative stress	GO:0003677|DNA binding;GO:0046872|metal ion binding;GO:0051287|NAD binding;GO:0003950|NAD+ ADP-ribosyltransferase activity;GO:0008270|zinc ion binding	GO:0005634|nucleus	K10798|PARP; poly [ADP-ribose] polymerase [EC:2.4.2.30]	map03410|Base excision repair
c45828_g1	5.75313	2.52435	0.000517741	0.0103349	up	yes	gi|567213449|ref|XM_006410820.1|	267	5e-137	Eutrema salsugineum hypothetical protein (EUTSA_v10016314mg) mRNA, complete cds	gi|151384083|gb|ABS11039.1|	624	2e-79	ammonia-lyase [Brassica oleracea var. gemmifera]	sp|P35510|PAL1_ARATH	246	E:1e-76	RecName: Full=Phenylalanine ammonia-lyase 1;^Eukaryota; Viridiplantae; Streptophyta; Embryophyta; Tracheophyta; Spermatophyta; Magnoliophyta; eudicotyledons; core eudicotyledons; rosids; malvids; Brassicales; Brassicaceae; Camelineae; Arabidopsis	sp|P35510|PAL1_ARATH	246	E:1e-76	RecName: Full=Phenylalanine ammonia-lyase 1;^Eukaryota; Viridiplantae; Streptophyta; Embryophyta; Tracheophyta; Spermatophyta; Magnoliophyta; eudicotyledons; core eudicotyledons; rosids; malvids; Brassicales; Brassicaceae; Camelineae; Arabidopsis	PF00221.14	Lyase_aromatic	Aromatic amino acid lyase	COG2986	Histidine ammonia-lyase	.	c45828_g1|m.12044	2-364[+]	.	.	GO:0009800|cinnamic acid biosynthetic process;GO:0009819|drought recovery;GO:0006559|L-phenylalanine catabolic process;GO:0046274|lignin catabolic process;GO:0009555|pollen development;GO:0080167|response to karrikin;GO:0006979|response to oxidative stress;GO:0010224|response to UV-B;GO:0046244|salicylic acid catabolic process	GO:0045548|phenylalanine ammonia-lyase activity	GO:0005737|cytoplasm	K10775|E4.3.1.24; phenylalanine ammonia-lyase [EC:4.3.1.24]	map01110|Biosynthesis of secondary metabolites;map01100|Metabolic pathways;map00940|Phenylpropanoid biosynthesis;map00360|Phenylalanine metabolism
c43878_g1	0.119356	-3.06665	0.00248527	0.0284397	down	yes	gi|297828721|ref|XM_002882197.1|	812	0	Arabidopsis lyrata subsp. lyrata predicted protein, mRNA	gi|727581586|ref|XP_010463681.1|	1976	0	PREDICTED: acyl-[acyl-carrier-protein] desaturase 2, chloroplastic [Camelina sativa]	sp|Q9M881|STAD2_ARATH	760	E:0	RecName: Full=Acyl-[acyl-carrier-protein] desaturase 2, chloroplastic;^Eukaryota; Viridiplantae; Streptophyta; Embryophyta; Tracheophyta; Spermatophyta; Magnoliophyta; eudicotyledons; core eudicotyledons; rosids; malvids; Brassicales; Brassicaceae; Camelineae; Arabidopsis	sp|Q9M881|STAD2_ARATH	760	E:0	RecName: Full=Acyl-[acyl-carrier-protein] desaturase 2, chloroplastic;^Eukaryota; Viridiplantae; Streptophyta; Embryophyta; Tracheophyta; Spermatophyta; Magnoliophyta; eudicotyledons; core eudicotyledons; rosids; malvids; Brassicales; Brassicaceae; Camelineae; Arabidopsis	PF03405.9	FA_desaturase_2	Fatty acid desaturase	NOG04820	Acyl-[Acyl-Carrier protein] desaturase	.	c43878_g1|m.12252	52-1305[-]	.	.	GO:0006633|fatty acid biosynthetic process	GO:0045300|acyl-[acyl-carrier-protein] desaturase activity;GO:0046914|transition metal ion binding	GO:0009507|chloroplast	K03921|DESA1; acyl-[acyl-carrier-protein] desaturase [EC:1.14.19.2]	map00061|Fatty acid biosynthesis;map01212|Fatty acid metabolism;map01040|Biosynthesis of unsaturated fatty acids
c45313_g3	0.193766	-2.36761	0.00198759	0.0243953	down	yes	gi|567167510|ref|XM_006398048.1|	1536	0	Eutrema salsugineum hypothetical protein (EUTSA_v10001203mg) mRNA, complete cds	gi|567167511|ref|XP_006398111.1|	3790	0	hypothetical protein EUTSA_v10001203mg [Eutrema salsugineum]	sp|C0LGP4|Y3475_ARATH	1300	E:0	RecName: Full=Probable LRR receptor-like serine/threonine-protein kinase At3g47570;^Eukaryota; Viridiplantae; Streptophyta; Embryophyta; Tracheophyta; Spermatophyta; Magnoliophyta; eudicotyledons; core eudicotyledons; rosids; malvids; Brassicales; Brassicaceae; Camelineae; Arabidopsis	sp|C0LGP4|Y3475_ARATH	1374	E:0	RecName: Full=Probable LRR receptor-like serine/threonine-protein kinase At3g47570;^Eukaryota; Viridiplantae; Streptophyta; Embryophyta; Tracheophyta; Spermatophyta; Magnoliophyta; eudicotyledons; core eudicotyledons; rosids; malvids; Brassicales; Brassicaceae; Camelineae; Arabidopsis	PF08263.7	LRRNT_2	Leucine rich repeat N-terminal domain	COG4886	Leucine-rich repeat (LRR) protein	.	c45313_g3|m.12277	214-3261[-]	sigP:1^30^0.647^YES	ExpAA=38.64^PredHel=1^Topology=o650-672i	GO:0042742|defense response to bacterium;GO:0016567|protein ubiquitination;GO:0032940|secretion by cell	GO:0005524|ATP binding;GO:0004674|protein serine/threonine kinase activity	GO:0016023|cytoplasmic membrane-bounded vesicle;GO:0016021|integral to membrane;GO:0005886|plasma membrane	.	.
c50437_g1	2.4915	1.31702	3.16974e-05	0.00158011	up	yes	gi|297825664|ref|XM_002880669.1|	654	0	Arabidopsis lyrata subsp. lyrata nucleotidyltransferase family protein, mRNA	gi|567205677|ref|XP_006408818.1|	1533	0	hypothetical protein EUTSA_v10001908mg [Eutrema salsugineum]	sp|Q54J73|PAP_DICDI	348	E:3e-110	RecName: Full=Poly(A) polymerase;^Eukaryota; Amoebozoa; Mycetozoa; Dictyosteliida; Dictyostelium	sp|Q54J73|PAP_DICDI	348	E:1e-111	RecName: Full=Poly(A) polymerase;^Eukaryota; Amoebozoa; Mycetozoa; Dictyosteliida; Dictyostelium	PF04928.12	PAP_central	Poly(A) polymerase central domain	COG5186	Poly(A) polymerase	.	c50437_g1|m.12357	250-1182[+]	.	.	GO:0006378|mRNA polyadenylation;GO:0006351|transcription, DNA-dependent	GO:0005524|ATP binding;GO:0046872|metal ion binding;GO:0004652|polynucleotide adenylyltransferase activity;GO:0003723|RNA binding	GO:0005847|mRNA cleavage and polyadenylation specificity factor complex	K14376|PAP; poly(A) polymerase [EC:2.7.7.19]	map03015|mRNA surveillance pathway
c40510_g1	4.13195	2.04682	0.00299162	0.0319775	up	yes	gi|297807570|ref|XM_002871623.1|	579	0	Arabidopsis lyrata subsp. lyrata hypothetical protein, mRNA	gi|565460488|ref|XP_006288243.1|	894	1e-113	hypothetical protein CARUB_v10001485mg [Capsella rubella]	sp|Q9LLC1|BCCP2_ARATH	333	E:5e-110	RecName: Full=Biotin carboxyl carrier protein of acetyl-CoA carboxylase 2, chloroplastic;^Eukaryota; Viridiplantae; Streptophyta; Embryophyta; Tracheophyta; Spermatophyta; Magnoliophyta; eudicotyledons; core eudicotyledons; rosids; malvids; Brassicales; Brassicaceae; Camelineae; Arabidopsis	sp|Q9LLC1|BCCP2_ARATH	400	E:9e-140	RecName: Full=Biotin carboxyl carrier protein of acetyl-CoA carboxylase 2, chloroplastic;^Eukaryota; Viridiplantae; Streptophyta; Embryophyta; Tracheophyta; Spermatophyta; Magnoliophyta; eudicotyledons; core eudicotyledons; rosids; malvids; Brassicales; Brassicaceae; Camelineae; Arabidopsis	PF00364.17	Biotin_lipoyl	Biotin-requiring enzyme	COG0511	Biotin carboxyl carrier protein	.	c40510_g1|m.13030	287-1057[-]	.	.	GO:0006633|fatty acid biosynthetic process	GO:0003989|acetyl-CoA carboxylase activity	GO:0009317|acetyl-CoA carboxylase complex;GO:0009941|chloroplast envelope;GO:0009570|chloroplast stroma	K02160|accB, bccP; acetyl-CoA carboxylase biotin carboxyl carrier protein	map00620|Pyruvate metabolism;map01200|Carbon metabolism;map01212|Fatty acid metabolism;map00640|Propanoate metabolism;map00720|Carbon fixation pathways in prokaryotes;map00061|Fatty acid biosynthesis;map01110|Biosynthesis of secondary metabolites;map01100|Metabolic pathways;map01120|Microbial metabolism in diverse environments;map00253|Tetracycline biosynthesis;map01130|Biosynthesis of antibiotics
c48919_g4	4.97419	2.31446	0.00265164	0.0295943	up	yes	gi|145336047|ref|NM_102167.3|	302	4e-156	Arabidopsis thaliana phosphoglucomutase 3 mRNA, complete cds	gi|685348830|ref|XP_009110113.1|	640	6e-76	PREDICTED: probable phosphoglucomutase, cytoplasmic 1 [Brassica rapa]	sp|O49299|PGMC1_ARATH	249	E:2e-76	RecName: Full=Probable phosphoglucomutase, cytoplasmic 1;^Eukaryota; Viridiplantae; Streptophyta; Embryophyta; Tracheophyta; Spermatophyta; Magnoliophyta; eudicotyledons; core eudicotyledons; rosids; malvids; Brassicales; Brassicaceae; Camelineae; Arabidopsis	sp|O49299|PGMC1_ARATH	239	E:4e-75	RecName: Full=Probable phosphoglucomutase, cytoplasmic 1;^Eukaryota; Viridiplantae; Streptophyta; Embryophyta; Tracheophyta; Spermatophyta; Magnoliophyta; eudicotyledons; core eudicotyledons; rosids; malvids; Brassicales; Brassicaceae; Camelineae; Arabidopsis	PF02878.11	PGM_PMM_I	Phosphoglucomutase/phosphomannomutase, alpha/beta/alpha domain I	COG0033	Phosphoglucomutase	.	c48919_g4|m.14154	440-805[+]	.	.	GO:0006874|cellular calcium ion homeostasis;GO:0009590|detection of gravity;GO:0019388|galactose catabolic process;GO:0048229|gametophyte development;GO:0019255|glucose 1-phosphate metabolic process;GO:0006006|glucose metabolic process;GO:0046686|response to cadmium ion;GO:0019252|starch biosynthetic process;GO:0005992|trehalose biosynthetic process	GO:0000287|magnesium ion binding;GO:0004614|phosphoglucomutase activity	GO:0009570|chloroplast stroma;GO:0044445|cytosolic part;GO:0005634|nucleus;GO:0005886|plasma membrane;GO:0010319|stromule	K01835|pgm; phosphoglucomutase [EC:5.4.2.2]	map00030|Pentose phosphate pathway;map00500|Starch and sucrose metabolism;map00010|Glycolysis / Gluconeogenesis;map00521|Streptomycin biosynthesis;map00520|Amino sugar and nucleotide sugar metabolism;map01110|Biosynthesis of secondary metabolites;map01100|Metabolic pathways;map00230|Purine metabolism;map01120|Microbial metabolism in diverse environments;map00052|Galactose metabolism;map01130|Bios…
c51769_g4	5.20263	2.37924	5.35147e-10	3.78267e-07	up	yes	gi|297830051|ref|XM_002882862.1|	698	0	Arabidopsis lyrata subsp. lyrata hypothetical protein, mRNA	gi|15232459|ref|NP_188119.1|	1376	0	RNA recognition motif-containing protein [Arabidopsis thaliana]	sp|A5A6H4|ROA1_PANTR	94.4	E:3e-20	RecName: Full=Heterogeneous nuclear ribonucleoprotein A1;^Eukaryota; Metazoa; Chordata; Craniata; Vertebrata; Euteleostomi; Mammalia; Eutheria; Euarchontoglires; Primates; Haplorrhini; Catarrhini; Hominidae; Pan	sp|A5A6H4|ROA1_PANTR	97.4	E:2e-21	RecName: Full=Heterogeneous nuclear ribonucleoprotein A1;^Eukaryota; Metazoa; Chordata; Craniata; Vertebrata; Euteleostomi; Mammalia; Eutheria; Euarchontoglires; Primates; Haplorrhini; Catarrhini; Hominidae; Pan`sp|A5A6H4|ROA1_PANTR	PF00076.17	RRM_1	RNA recognition motif. (a.k.a. RRM, RBD, or RNP domain)	COG0724	RNA-binding proteins (RRM domain)	.	c51769_g4|m.14687	7-1218[-]	.	.	GO:0006397|mRNA processing;GO:0051028|mRNA transport;GO:0008380|RNA splicing	GO:0000166|nucleotide binding;GO:0003723|RNA binding	GO:0005737|cytoplasm;GO:0030529|ribonucleoprotein complex;GO:0005681|spliceosomal complex	K12741|HNRNPA1_3; heterogeneous nuclear ribonucleoprotein A1/A3	map03040|Spliceosome
c42046_g1	10.2412	3.35631	0.000616375	0.0114963	up	yes	gi|567124667|ref|XM_006391181.1|	707	0	Eutrema salsugineum hypothetical protein (EUTSA_v10018287mg) mRNA, complete cds	gi|567124668|ref|XP_006391243.1|	1571	0	hypothetical protein EUTSA_v10018287mg [Eutrema salsugineum]	sp|Q14181|DPOA2_HUMAN	149	E:2e-36	RecName: Full=DNA polymerase alpha subunit B;^Eukaryota; Metazoa; Chordata; Craniata; Vertebrata; Euteleostomi; Mammalia; Eutheria; Euarchontoglires; Primates; Haplorrhini; Catarrhini; Hominidae; Homo`sp|Q14181|DPOA2_HUMAN	sp|P33611|DPOA2_MOUSE	79.3	E:1e-14	RecName: Full=DNA polymerase alpha subunit B;^Eukaryota; Metazoa; Chordata; Craniata; Vertebrata; Euteleostomi; Mammalia; Eutheria; Euarchontoglires; Glires; Rodentia; Sciurognathi; Muroidea; Muridae; Murinae; Mus; Mus	PF08418.5	Pol_alpha_B_N	DNA polymerase alpha subunit B N-terminal	COG5214	DNA polymerase alpha-primase complex, polymerase-associated subunit B	.	c42046_g1|m.14747	1027-2250[-]	.	.	GO:0006260|DNA replication;GO:0000060|protein import into nucleus, translocation	GO:0003677|DNA binding;GO:0003887|DNA-directed DNA polymerase activity	GO:0005658|alpha DNA polymerase:primase complex;GO:0005737|cytoplasm	K02321|POLA2; DNA polymerase alpha subunit B	map03030|DNA replication;map01100|Metabolic pathways;map00240|Pyrimidine metabolism;map00230|Purine metabolism
c42046_g1	10.2412	3.35631	0.000616375	0.0114963	up	yes	gi|567124667|ref|XM_006391181.1|	707	0	Eutrema salsugineum hypothetical protein (EUTSA_v10018287mg) mRNA, complete cds	gi|567124668|ref|XP_006391243.1|	1571	0	hypothetical protein EUTSA_v10018287mg [Eutrema salsugineum]	sp|Q14181|DPOA2_HUMAN	149	E:2e-36	RecName: Full=DNA polymerase alpha subunit B;^Eukaryota; Metazoa; Chordata; Craniata; Vertebrata; Euteleostomi; Mammalia; Eutheria; Euarchontoglires; Primates; Haplorrhini; Catarrhini; Hominidae; Homo`sp|Q14181|DPOA2_HUMAN	sp|Q14181|DPOA2_HUMAN	127	E:9e-33	RecName: Full=DNA polymerase alpha subunit B;^Eukaryota; Metazoa; Chordata; Craniata; Vertebrata; Euteleostomi; Mammalia; Eutheria; Euarchontoglires; Primates; Haplorrhini; Catarrhini; Hominidae; Homo	PF04042.11	DNA_pol_E_B	DNA polymerase alpha/epsilon subunit B	COG5214	DNA polymerase alpha-primase complex, polymerase-associated subunit B	.	c42046_g1|m.14748	196-753[-]	.	.	GO:0006270|DNA replication initiation;GO:0006271|DNA strand elongation involved in DNA replication;GO:0000082|G1/S transition of mitotic cell cycle;GO:0000216|M/G1 transition of mitotic cell cycle;GO:0000060|protein import into nucleus, translocation;GO:0000084|S phase of mitotic cell cycle;GO:0000722|telomere maintenance via recombination;GO:0032201|telomere maintenance via semi-conservative rep…	GO:0003677|DNA binding;GO:0003887|DNA-directed DNA polymerase activity	GO:0005658|alpha DNA polymerase:primase complex;GO:0005737|cytoplasm;GO:0005654|nucleoplasm	K02321|POLA2; DNA polymerase alpha subunit B	map03030|DNA replication;map01100|Metabolic pathways;map00240|Pyrimidine metabolism;map00230|Purine metabolism
c52468_g2	3.04968	1.60866	0.000609711	0.0114184	up	yes	gi|297830051|ref|XM_002882862.1|	327	6e-170	Arabidopsis lyrata subsp. lyrata hypothetical protein, mRNA	gi|567131825|ref|XP_006392809.1|	1195	1e-160	hypothetical protein EUTSA_v10011518mg [Eutrema salsugineum]	sp|P09651|ROA1_HUMAN	96.7	E:1e-21	RecName: Full=Heterogeneous nuclear ribonucleoprotein A1;^Eukaryota; Metazoa; Chordata; Craniata; Vertebrata; Euteleostomi; Mammalia; Eutheria; Euarchontoglires; Primates; Haplorrhini; Catarrhini; Hominidae; Homo	sp|A5A6H4|ROA1_PANTR	98.2	E:3e-22	RecName: Full=Heterogeneous nuclear ribonucleoprotein A1;^Eukaryota; Metazoa; Chordata; Craniata; Vertebrata; Euteleostomi; Mammalia; Eutheria; Euarchontoglires; Primates; Haplorrhini; Catarrhini; Hominidae; Pan	PF00076.17	RRM_1	RNA recognition motif. (a.k.a. RRM, RBD, or RNP domain)	COG0724	RNA-binding proteins (RRM domain)	.	c52468_g2|m.14857	3-908[+]	.	.	GO:0006397|mRNA processing;GO:0051028|mRNA transport;GO:0008380|RNA splicing	GO:0000166|nucleotide binding;GO:0003723|RNA binding	GO:0005737|cytoplasm;GO:0030529|ribonucleoprotein complex;GO:0005681|spliceosomal complex	K12741|HNRNPA1_3; heterogeneous nuclear ribonucleoprotein A1/A3	map03040|Spliceosome
c42547_g1	3.267	1.70797	0.00527451	0.0465288	up	yes	gi|567175120|ref|XM_006400274.1|	324	1e-168	Eutrema salsugineum hypothetical protein (EUTSA_v10012750mg) mRNA, complete cds	gi|685281438|ref|XP_009131623.1|	642	4e-77	PREDICTED: 5-methyltetrahydropteroyltriglutamate--homocysteine methyltransferase 1 [Brassica rapa]	sp|O50008|METE_ARATH	245	E:8e-76	RecName: Full=5-methyltetrahydropteroyltriglutamate--homocysteine methyltransferase;^Eukaryota; Viridiplantae; Streptophyta; Embryophyta; Tracheophyta; Spermatophyta; Magnoliophyta; eudicotyledons; core eudicotyledons; rosids; malvids; Brassicales; Brassicaceae; Camelineae; Arabidopsis	sp|O50008|METE_ARATH	245	E:8e-76	RecName: Full=5-methyltetrahydropteroyltriglutamate--homocysteine methyltransferase;^Eukaryota; Viridiplantae; Streptophyta; Embryophyta; Tracheophyta; Spermatophyta; Magnoliophyta; eudicotyledons; core eudicotyledons; rosids; malvids; Brassicales; Brassicaceae; Camelineae; Arabidopsis	PF08267.7	Meth_synt_1	Cobalamin-independent synthase, N-terminal domain	COG0620	Methionine synthase II (cobalamin-independent)	.	c42547_g1|m.15057	1-384[-]	.	.	GO:0046686|response to cadmium ion;GO:0009651|response to salt stress;GO:0010043|response to zinc ion	GO:0003871|5-methyltetrahydropteroyltriglutamate-homocysteine S-methyltransferase activity;GO:0005507|copper ion binding;GO:0008705|methionine synthase activity;GO:0008270|zinc ion binding	GO:0048046|apoplast;GO:0009570|chloroplast stroma;GO:0005829|cytosol;GO:0005777|peroxisome;GO:0005886|plasma membrane;GO:0009506|plasmodesma;GO:0005774|vacuolar membrane	K00549|metE; 5-methyltetrahydropteroyltriglutamate--homocysteine methyltransferase [EC:2.1.1.14]	map01230|Biosynthesis of amino acids;map01100|Metabolic pathways;map00270|Cysteine and methionine metabolism;map01110|Biosynthesis of secondary metabolites;map00450|Selenocompound metabolism
c48821_g1	0.191065	-2.38787	0.00124815	0.0181083	down	yes	gi|567196792|ref|XM_006406325.1|	530	0	Eutrema salsugineum hypothetical protein (EUTSA_v10020911mg) mRNA, complete cds	gi|567196793|ref|XP_006406388.1|	1449	0	hypothetical protein EUTSA_v10020911mg [Eutrema salsugineum]	sp|Q9FPT1|UBP12_ARATH	65.5	E:8e-10	RecName: Full=Ubiquitin carboxyl-terminal hydrolase 12;^Eukaryota; Viridiplantae; Streptophyta; Embryophyta; Tracheophyta; Spermatophyta; Magnoliophyta; eudicotyledons; core eudicotyledons; rosids; malvids; Brassicales; Brassicaceae; Camelineae; Arabidopsis	sp|Q9FPT1|UBP12_ARATH	65.1	E:5e-10	RecName: Full=Ubiquitin carboxyl-terminal hydrolase 12;^Eukaryota; Viridiplantae; Streptophyta; Embryophyta; Tracheophyta; Spermatophyta; Magnoliophyta; eudicotyledons; core eudicotyledons; rosids; malvids; Brassicales; Brassicaceae; Camelineae; Arabidopsis`sp|Q9FPT1|UBP12_ARATH	PF00917.21	MATH	MATH domain	COG5077	Ubiquitin carboxyl-terminal hydrolase	.	c48821_g1|m.15387	248-1405[-]	sigP:1^25^0.796^YES	ExpAA=20.73^PredHel=1^Topology=i7-29o	GO:0006511|ubiquitin-dependent protein catabolic process	GO:0008234|cysteine-type peptidase activity;GO:0004221|ubiquitin thiolesterase activity	GO:0005829|cytosol	.	.
c42699_g1	5.16494	2.36875	0.00407074	0.0391004	up	yes	gi|567122653|ref|XM_006390625.1|	673	0	Eutrema salsugineum hypothetical protein (EUTSA_v10019648mg) mRNA, complete cds	gi|567122654|ref|XP_006390687.1|	1549	0	hypothetical protein EUTSA_v10019648mg [Eutrema salsugineum]	sp|Q84W40|ATL11_ARATH	564	E:0	RecName: Full=RING-H2 finger protein ATL11;^Eukaryota; Viridiplantae; Streptophyta; Embryophyta; Tracheophyta; Spermatophyta; Magnoliophyta; eudicotyledons; core eudicotyledons; rosids; malvids; Brassicales; Brassicaceae; Camelineae; Arabidopsis	sp|Q84W40|ATL11_ARATH	610	E:0	RecName: Full=RING-H2 finger protein ATL11;^Eukaryota; Viridiplantae; Streptophyta; Embryophyta; Tracheophyta; Spermatophyta; Magnoliophyta; eudicotyledons; core eudicotyledons; rosids; malvids; Brassicales; Brassicaceae; Camelineae; Arabidopsis	PF12678.2	zf-rbx1	RING-H2 zinc finger	NOG238162	Heat shock protein	.	c42699_g1|m.15996	235-1422[+]	sigP:1^38^0.717^YES	ExpAA=43.03^PredHel=2^Topology=i21-38o58-80i	GO:0016567|protein ubiquitination	GO:0046872|metal ion binding;GO:0008270|zinc ion binding	GO:0016021|integral to membrane	.	.
c35228_g1	4.89644	2.29173	4.26281e-05	0.00195529	up	yes	gi|565498399|ref|XM_006306777.1|	355	0	Capsella rubella hypothetical protein (CARUB_v10008382mg) mRNA, complete cds	gi|565498400|ref|XP_006306839.1|	1039	4e-131	hypothetical protein CARUB_v10008382mg [Capsella rubella]	sp|Q56YP2|PI5K1_ARATH	400	E:1e-130	RecName: Full=Phosphatidylinositol 4-phosphate 5-kinase 1;^Eukaryota; Viridiplantae; Streptophyta; Embryophyta; Tracheophyta; Spermatophyta; Magnoliophyta; eudicotyledons; core eudicotyledons; rosids; malvids; Brassicales; Brassicaceae; Camelineae; Arabidopsis	sp|Q56YP2|PI5K1_ARATH	439	E:7e-148	RecName: Full=Phosphatidylinositol 4-phosphate 5-kinase 1;^Eukaryota; Viridiplantae; Streptophyta; Embryophyta; Tracheophyta; Spermatophyta; Magnoliophyta; eudicotyledons; core eudicotyledons; rosids; malvids; Brassicales; Brassicaceae; Camelineae; Arabidopsis	PF02493.15	MORN	MORN repeat	COG4642	Uncharacterized protein conserved in bacteria	.	c35228_g1|m.16115	348-1193[+]	.	.	GO:0006950|response to stress	GO:0016308|1-phosphatidylinositol-4-phosphate 5-kinase activity;GO:0051015|actin filament binding;GO:0003785|actin monomer binding;GO:0005524|ATP binding	GO:0005886|plasma membrane	K00889|PIP5K; 1-phosphatidylinositol-4-phosphate 5-kinase [EC:2.7.1.68]	map00562|Inositol phosphate metabolism;map04144|Endocytosis;map04070|Phosphatidylinositol signaling system;map05231|Choline metabolism in cancer;map01100|Metabolic pathways;map04666|Fc gamma R-mediated phagocytosis;map04810|Regulation of actin cytoskeleton
c39489_g1	0.347522	-1.52482	2.12923e-05	0.00119789	down	yes	gi|567135083|ref|XM_006393612.1|	275	3e-141	Eutrema salsugineum hypothetical protein (EUTSA_v10011873mg) mRNA, complete cds	gi|685341603|ref|XP_009107463.1|	565	2e-71	PREDICTED: thioredoxin H5 [Brassica rapa]	sp|Q39241|TRXH5_ARATH	213	E:3e-69	RecName: Full=Thioredoxin H5;^Eukaryota; Viridiplantae; Streptophyta; Embryophyta; Tracheophyta; Spermatophyta; Magnoliophyta; eudicotyledons; core eudicotyledons; rosids; malvids; Brassicales; Brassicaceae; Camelineae; Arabidopsis	sp|Q39241|TRXH5_ARATH	213	E:1e-70	RecName: Full=Thioredoxin H5;^Eukaryota; Viridiplantae; Streptophyta; Embryophyta; Tracheophyta; Spermatophyta; Magnoliophyta; eudicotyledons; core eudicotyledons; rosids; malvids; Brassicales; Brassicaceae; Camelineae; Arabidopsis	PF00085.15	Thioredoxin	Thioredoxin	COG0526	Thiol-disulfide isomerase and thioredoxins	.	c39489_g1|m.16162	242-592[-]	.	.	GO:0045454|cell redox homeostasis;GO:0050832|defense response to fungus;GO:0022900|electron transport chain;GO:0006662|glycerol ether metabolic process;GO:0046686|response to cadmium ion;GO:0010188|response to microbial phytotoxin;GO:0006979|response to oxidative stress	GO:0009055|electron carrier activity;GO:0016671|oxidoreductase activity, acting on a sulfur group of donors, disulfide as acceptor;GO:0015035|protein disulfide oxidoreductase activity	GO:0048046|apoplast;GO:0005829|cytosol;GO:0005886|plasma membrane;GO:0009506|plasmodesma	K03671|trxA; thioredoxin 1	map00450|Selenocompound metabolism;map00240|Pyrimidine metabolism
c51800_g3	63.7387	5.9941	6.63195e-08	1.81013e-05	up	yes	gi|30681587|ref|NM_120756.2|	713	0	Arabidopsis thaliana peroxidase 54 mRNA, complete cds	gi|567171118|ref|XP_006399147.1|	1453	0	hypothetical protein EUTSA_v10013916mg [Eutrema salsugineum]	sp|Q9FG34|PER54_ARATH	546	E:0	RecName: Full=Peroxidase 54;^Eukaryota; Viridiplantae; Streptophyta; Embryophyta; Tracheophyta; Spermatophyta; Magnoliophyta; eudicotyledons; core eudicotyledons; rosids; malvids; Brassicales; Brassicaceae; Camelineae; Arabidopsis	sp|Q9FG34|PER54_ARATH	624	E:0	RecName: Full=Peroxidase 54;^Eukaryota; Viridiplantae; Streptophyta; Embryophyta; Tracheophyta; Spermatophyta; Magnoliophyta; eudicotyledons; core eudicotyledons; rosids; malvids; Brassicales; Brassicaceae; Camelineae; Arabidopsis	PF00141.18	peroxidase	Peroxidase	.	.	.	c51800_g3|m.16672	24-1106[-]	sigP:1^31^0.586^YES	ExpAA=21.45^PredHel=1^Topology=i13-35o	GO:0042744|hydrogen peroxide catabolic process	GO:0020037|heme binding;GO:0046872|metal ion binding;GO:0004601|peroxidase activity	GO:0005576|extracellular region;GO:0005774|vacuolar membrane	K00430|E1.11.1.7; peroxidase [EC:1.11.1.7]	map01100|Metabolic pathways;map00940|Phenylpropanoid biosynthesis;map01110|Biosynthesis of secondary metabolites
c30497_g1	27.6547	4.78946	0.00037241	0.00842184	up	yes	gi|297821225|ref|XM_002878450.1|	291	3e-150	Arabidopsis lyrata subsp. lyrata ATIPT3, mRNA	gi|674242708|gb|KFK35473.1|	673	9e-86	hypothetical protein AALP_AA5G288800 [Arabis alpina]	sp|Q93WC9|IPT3_ARATH	260	E:9e-86	RecName: Full=Adenylate isopentenyltransferase 3, chloroplastic;^Eukaryota; Viridiplantae; Streptophyta; Embryophyta; Tracheophyta; Spermatophyta; Magnoliophyta; eudicotyledons; core eudicotyledons; rosids; malvids; Brassicales; Brassicaceae; Camelineae; Arabidopsis	sp|Q93WC9|IPT3_ARATH	260	E:9e-86	RecName: Full=Adenylate isopentenyltransferase 3, chloroplastic;^Eukaryota; Viridiplantae; Streptophyta; Embryophyta; Tracheophyta; Spermatophyta; Magnoliophyta; eudicotyledons; core eudicotyledons; rosids; malvids; Brassicales; Brassicaceae; Camelineae; Arabidopsis	PF01745.11	IPT	Isopentenyl transferase	COG0324	tRNA delta(2)-isopentenylpyrophosphate transferase	.	c30497_g1|m.16974	2-403[-]	.	.	GO:0009691|cytokinin biosynthetic process;GO:0008033|tRNA processing	GO:0052623|ADP dimethylallyltransferase activity;GO:0009824|AMP dimethylallyltransferase activity;GO:0005524|ATP binding;GO:0052622|ATP dimethylallyltransferase activity	GO:0009507|chloroplast;GO:0031965|nuclear membrane;GO:0005634|nucleus;GO:0009536|plastid	K10760|IPT; adenylate isopentenyltransferase (cytokinin synthase)	map00908|Zeatin biosynthesis;map01100|Metabolic pathways;map01110|Biosynthesis of secondary metabolites
c30821_g1	24.8846	4.63718	0.000671244	0.0121658	up	yes	gi|567195434|ref|XM_006405940.1|	600	0	Eutrema salsugineum hypothetical protein (EUTSA_v10022241mg) mRNA, complete cds	gi|567195435|ref|XP_006406003.1|	1509	0	hypothetical protein EUTSA_v10022241mg [Eutrema salsugineum]	sp|Q94ID1|IPT7_ARATH	555	E:0	RecName: Full=Adenylate isopentenyltransferase 7, mitochondrial;^Eukaryota; Viridiplantae; Streptophyta; Embryophyta; Tracheophyta; Spermatophyta; Magnoliophyta; eudicotyledons; core eudicotyledons; rosids; malvids; Brassicales; Brassicaceae; Camelineae; Arabidopsis	sp|Q94ID1|IPT7_ARATH	555	E:0	RecName: Full=Adenylate isopentenyltransferase 7, mitochondrial;^Eukaryota; Viridiplantae; Streptophyta; Embryophyta; Tracheophyta; Spermatophyta; Magnoliophyta; eudicotyledons; core eudicotyledons; rosids; malvids; Brassicales; Brassicaceae; Camelineae; Arabidopsis	PF01745.11	IPT	Isopentenyl transferase	COG0324	tRNA delta(2)-isopentenylpyrophosphate transferase	.	c30821_g1|m.17023	165-1157[-]	.	.	GO:0009691|cytokinin biosynthetic process;GO:0009860|pollen tube growth;GO:0008033|tRNA processing	GO:0052623|ADP dimethylallyltransferase activity;GO:0009824|AMP dimethylallyltransferase activity;GO:0005524|ATP binding;GO:0052622|ATP dimethylallyltransferase activity	GO:0005739|mitochondrion	K10760|IPT; adenylate isopentenyltransferase (cytokinin synthase)	map00908|Zeatin biosynthesis;map01100|Metabolic pathways;map01110|Biosynthesis of secondary metabolites
c40750_g1	14.3795	3.84594	3.15364e-06	0.0002947	up	yes	gi|567189707|ref|XM_006404409.1|	596	0	Eutrema salsugineum hypothetical protein (EUTSA_v10010504mg) mRNA, complete cds	gi|297815546|ref|XP_002875656.1|	1569	0	nitrilase 2 [Arabidopsis lyrata subsp. lyrata]	sp|P32962|NRL2_ARATH	599	E:0	RecName: Full=Nitrilase 2;^Eukaryota; Viridiplantae; Streptophyta; Embryophyta; Tracheophyta; Spermatophyta; Magnoliophyta; eudicotyledons; core eudicotyledons; rosids; malvids; Brassicales; Brassicaceae; Camelineae; Arabidopsis	sp|P32962|NRL2_ARATH	597	E:0	RecName: Full=Nitrilase 2;^Eukaryota; Viridiplantae; Streptophyta; Embryophyta; Tracheophyta; Spermatophyta; Magnoliophyta; eudicotyledons; core eudicotyledons; rosids; malvids; Brassicales; Brassicaceae; Camelineae; Arabidopsis	PF00795.17	CN_hydrolase	Carbon-nitrogen hydrolase	COG0388	Predicted amidohydrolase	.	c40750_g1|m.17355	265-1269[-]	.	.	GO:0009684|indoleacetic acid biosynthetic process;GO:0046686|response to cadmium ion	GO:0080061|indole-3-acetonitrile nitrilase activity;GO:0080109|indole-3-acetonitrile nitrile hydratase activity	GO:0005829|cytosol;GO:0005886|plasma membrane	K01501|E3.5.5.1; nitrilase [EC:3.5.5.1]	map00627|Aminobenzoate degradation;map00643|Styrene degradation;map00460|Cyanoamino acid metabolism;map00380|Tryptophan metabolism;map01120|Microbial metabolism in diverse environments;map00910|Nitrogen metabolism
c52581_g1	0.202624	-2.30312	0.000124694	0.0041365	down	yes	gi|567184051|ref|XM_006402802.1|	651	0	Eutrema salsugineum hypothetical protein (EUTSA_v10006029mg) mRNA, complete cds	gi|567184052|ref|XP_006402865.1|	1365	2e-176	hypothetical protein EUTSA_v10006029mg [Eutrema salsugineum]	sp|Q16774|KGUA_HUMAN	145	E:2e-42	RecName: Full=Guanylate kinase;^Eukaryota; Metazoa; Chordata; Craniata; Vertebrata; Euteleostomi; Mammalia; Eutheria; Euarchontoglires; Primates; Haplorrhini; Catarrhini; Hominidae; Homo`sp|Q16774|KGUA_HUMAN	sp|Q54XF2|KGUA_DICDI	125	E:5e-35	RecName: Full=Guanylate kinase;^Eukaryota; Amoebozoa; Mycetozoa; Dictyosteliida; Dictyostelium	PF00625.16	Guanylate_kin	Guanylate kinase	COG0194	Guanylate kinase	.	c52581_g1|m.17727	1900-2247[-]	.	.	GO:0046037|GMP metabolic process	GO:0005524|ATP binding;GO:0004385|guanylate kinase activity	GO:0005737|cytoplasm	K00942|E2.7.4.8, gmk; guanylate kinase [EC:2.7.4.8]	map01100|Metabolic pathways;map00230|Purine metabolism
c46302_g2	3.34043	1.74003	0.000374565	0.00845144	up	yes	gi|297807144|ref|XM_002871410.1|	1284	0	Arabidopsis lyrata subsp. lyrata ATSPS2F, mRNA	gi|685322422|ref|XP_009151050.1|	5006	0	PREDICTED: probable sucrose-phosphate synthase 2 [Brassica rapa]	sp|Q9FY54|SPSA2_ARATH	1723	E:0	RecName: Full=Probable sucrose-phosphate synthase 2;^Eukaryota; Viridiplantae; Streptophyta; Embryophyta; Tracheophyta; Spermatophyta; Magnoliophyta; eudicotyledons; core eudicotyledons; rosids; malvids; Brassicales; Brassicaceae; Camelineae; Arabidopsis	sp|Q9FY54|SPSA2_ARATH	1513	E:0	RecName: Full=Probable sucrose-phosphate synthase 2;^Eukaryota; Viridiplantae; Streptophyta; Embryophyta; Tracheophyta; Spermatophyta; Magnoliophyta; eudicotyledons; core eudicotyledons; rosids; malvids; Brassicales; Brassicaceae; Camelineae; Arabidopsis	PF13579.1	Glyco_trans_4_4	Glycosyl transferase 4-like domain	COG0438	Glycosyltransferase	.	c46302_g2|m.18049	675-3413[-]	.	.	GO:0010208|pollen wall assembly;GO:0005986|sucrose biosynthetic process	GO:0046524|sucrose-phosphate synthase activity	GO:0005886|plasma membrane	K00696|E2.4.1.14; sucrose-phosphate synthase [EC:2.4.1.14]	map01100|Metabolic pathways;map00500|Starch and sucrose metabolism
c46302_g2	3.34043	1.74003	0.000374565	0.00845144	up	yes	gi|297807144|ref|XM_002871410.1|	1284	0	Arabidopsis lyrata subsp. lyrata ATSPS2F, mRNA	gi|685322422|ref|XP_009151050.1|	5006	0	PREDICTED: probable sucrose-phosphate synthase 2 [Brassica rapa]	sp|Q9FY54|SPSA2_ARATH	1723	E:0	RecName: Full=Probable sucrose-phosphate synthase 2;^Eukaryota; Viridiplantae; Streptophyta; Embryophyta; Tracheophyta; Spermatophyta; Magnoliophyta; eudicotyledons; core eudicotyledons; rosids; malvids; Brassicales; Brassicaceae; Camelineae; Arabidopsis	sp|Q9FY54|SPSA2_ARATH	227	E:2e-68	RecName: Full=Probable sucrose-phosphate synthase 2;^Eukaryota; Viridiplantae; Streptophyta; Embryophyta; Tracheophyta; Spermatophyta; Magnoliophyta; eudicotyledons; core eudicotyledons; rosids; malvids; Brassicales; Brassicaceae; Camelineae; Arabidopsis	PF05116.8	S6PP	Sucrose-6F-phosphate phosphohydrolase	COG0438	Glycosyltransferase	.	c46302_g2|m.18050	204-608[-]	.	.	GO:0010208|pollen wall assembly;GO:0005986|sucrose biosynthetic process	GO:0046524|sucrose-phosphate synthase activity	GO:0005886|plasma membrane	K00696|E2.4.1.14; sucrose-phosphate synthase [EC:2.4.1.14]	map01100|Metabolic pathways;map00500|Starch and sucrose metabolism
c44313_g2	42.855	5.42139	3.24178e-06	0.000298924	up	yes	gi|567156259|ref|XM_006418248.1|	1438	0	Eutrema salsugineum hypothetical protein (EUTSA_v10006597mg) mRNA, complete cds	gi|567156260|ref|XP_006418311.1|	2924	0	hypothetical protein EUTSA_v10006597mg [Eutrema salsugineum]	sp|Q9SRW9|CSLD5_ARATH	1105	E:0	RecName: Full=Cellulose synthase-like protein D5;^Eukaryota; Viridiplantae; Streptophyta; Embryophyta; Tracheophyta; Spermatophyta; Magnoliophyta; eudicotyledons; core eudicotyledons; rosids; malvids; Brassicales; Brassicaceae; Camelineae; Arabidopsis	sp|Q9SRW9|CSLD5_ARATH	1141	E:0	RecName: Full=Cellulose synthase-like protein D5;^Eukaryota; Viridiplantae; Streptophyta; Embryophyta; Tracheophyta; Spermatophyta; Magnoliophyta; eudicotyledons; core eudicotyledons; rosids; malvids; Brassicales; Brassicaceae; Camelineae; Arabidopsis	PF03552.9	Cellulose_synt	Cellulose synthase	COG1215	Glycosyltransferases, probably involved in cell wall biogenesis	.	c44313_g2|m.18669	152-2080[+]	.	.	GO:0042546|cell wall biogenesis;GO:0030244|cellulose biosynthetic process;GO:0009651|response to salt stress;GO:0009414|response to water deprivation;GO:0048367|shoot development	GO:0016760|cellulose synthase (UDP-forming) activity;GO:0046527|glucosyltransferase activity;GO:0051753|mannan synthase activity	GO:0005794|Golgi apparatus;GO:0000139|Golgi membrane;GO:0016021|integral to membrane	K00770|E2.4.2.24; 1,4-beta-D-xylan synthase [EC:2.4.2.24]	map01100|Metabolic pathways;map00500|Starch and sucrose metabolism;map00520|Amino sugar and nucleotide sugar metabolism
c47621_g2	24.1599	4.59454	0.00155939	0.0209799	up	yes	gi|629652776|ref|XM_007793659.1|	84	4e-35	Eutypa lata UCREL1 putative 60s ribosomal protein l28 protein mRNA	gi|669142102|ref|XP_008606613.1|	500	9e-62	60S ribosomal protein L27a [Saprolegnia diclina VS20]	sp|P18445|RL27A_RAT	184	E:4e-58	RecName: Full=60S ribosomal protein L27a;^Eukaryota; Metazoa; Chordata; Craniata; Vertebrata; Euteleostomi; Mammalia; Eutheria; Euarchontoglires; Glires; Rodentia; Sciurognathi; Muroidea; Muridae; Murinae; Rattus	sp|P18445|RL27A_RAT	218	E:2e-71	RecName: Full=60S ribosomal protein L27a;^Eukaryota; Metazoa; Chordata; Craniata; Vertebrata; Euteleostomi; Mammalia; Eutheria; Euarchontoglires; Glires; Rodentia; Sciurognathi; Muroidea; Muridae; Murinae; Rattus	PF00828.14	Ribosomal_L18e	Ribosomal protein L18e/L15	COG0200	Ribosomal protein L15	.	c47621_g2|m.19031	26-472[+]	.	.	GO:0006412|translation	GO:0003735|structural constituent of ribosome	GO:0005840|ribosome	K02900|RP-L27Ae, RPL27A; large subunit ribosomal protein L27Ae	map03010|Ribosome
c42393_g1	21.302	4.41291	0.00248732	0.0284515	up	yes	gi|166050294|emb|CU355991.1|	130	2e-60	Aphanomyces euteiches cDNA	gi|168002136|ref|XP_001753770.1|	850	1e-109	predicted protein [Physcomitrella patens]	sp|Q9SCM3|RS24_ARATH	325	E:2e-108	RecName: Full=40S ribosomal protein S2-4;^Eukaryota; Viridiplantae; Streptophyta; Embryophyta; Tracheophyta; Spermatophyta; Magnoliophyta; eudicotyledons; core eudicotyledons; rosids; malvids; Brassicales; Brassicaceae; Camelineae; Arabidopsis	sp|P31009|RS2_DROME	345	E:8e-117	RecName: Full=40S ribosomal protein S2;^Eukaryota; Metazoa; Ecdysozoa; Arthropoda; Hexapoda; Insecta; Pterygota; Neoptera; Endopterygota; Diptera; Brachycera; Muscomorpha; Ephydroidea; Drosophilidae; Drosophila; Sophophora	PF00333.15	Ribosomal_S5	Ribosomal protein S5, N-terminal domain	COG0098	Ribosomal protein S5	.	c42393_g1|m.19139	74-1054[-]	.	.	GO:0030154|cell differentiation;GO:0007275|multicellular organismal development;GO:0048477|oogenesis;GO:0006412|translation	GO:0003723|RNA binding;GO:0003735|structural constituent of ribosome	GO:0005811|lipid particle;GO:0005840|ribosome;GO:0015935|small ribosomal subunit	K02981|RP-S2e, RPS2; small subunit ribosomal protein S2e	map03010|Ribosome
c43152_g2	0.248173	-2.01058	0.00322067	0.0334359	down	yes	gi|565474647|ref|XM_006294903.1|	383	0	Capsella rubella hypothetical protein (CARUB_v10024021mg) mRNA, complete cds	gi|567209513|ref|XP_006409840.1|	726	3e-90	hypothetical protein EUTSA_v10017094mg [Eutrema salsugineum]	sp|O78310|SODC2_ARATH	279	E:3e-90	RecName: Full=Superoxide dismutase [Cu-Zn] 2, chloroplastic;^Eukaryota; Viridiplantae; Streptophyta; Embryophyta; Tracheophyta; Spermatophyta; Magnoliophyta; eudicotyledons; core eudicotyledons; rosids; malvids; Brassicales; Brassicaceae; Camelineae; Arabidopsis	sp|O78310|SODC2_ARATH	323	E:1e-110	RecName: Full=Superoxide dismutase [Cu-Zn] 2, chloroplastic;^Eukaryota; Viridiplantae; Streptophyta; Embryophyta; Tracheophyta; Spermatophyta; Magnoliophyta; eudicotyledons; core eudicotyledons; rosids; malvids; Brassicales; Brassicaceae; Camelineae; Arabidopsis	PF00080.15	Sod_Cu	Copper/zinc superoxide dismutase (SODC)	COG2032	Cu/Zn superoxide dismutase	.	c43152_g2|m.19281	1-684[+]	.	.	GO:0071484|cellular response to light intensity;GO:0071457|cellular response to ozone;GO:0071472|cellular response to salt stress;GO:0071329|cellular response to sucrose stimulus;GO:0071493|cellular response to UV-B;GO:0035195|gene silencing by miRNA;GO:0019430|removal of superoxide radicals;GO:0046688|response to copper ion;GO:0010039|response to iron ion	GO:0005507|copper ion binding;GO:0004784|superoxide dismutase activity;GO:0008270|zinc ion binding	GO:0048046|apoplast;GO:0009570|chloroplast stroma;GO:0009579|thylakoid	K04565|SOD1; superoxide dismutase, Cu-Zn family [EC:1.15.1.1]	map05014|Amyotrophic lateral sclerosis (ALS);map05016|Huntington's disease;map05020|Prion diseases;map04146|Peroxisome
c45536_g1	2.17336	1.11993	0.00255668	0.0289562	up	yes	gi|297801519|ref|XM_002868598.1|	808	0	Arabidopsis lyrata subsp. lyrata hypothetical protein, mRNA	gi|565443646|ref|XP_006283863.1|	1593	0	hypothetical protein CARUB_v10004974mg [Capsella rubella]	sp|Q9SCX9|GPDA_ARATH	605	E:0	RecName: Full=Glycerol-3-phosphate dehydrogenase [NAD(+)] 1, chloroplastic;^Eukaryota; Viridiplantae; Streptophyta; Embryophyta; Tracheophyta; Spermatophyta; Magnoliophyta; eudicotyledons; core eudicotyledons; rosids; malvids; Brassicales; Brassicaceae; Camelineae; Arabidopsis`sp|Q9SCX9|GPDA_ARATH	sp|Q9SCX9|GPDA_ARATH	608	E:0	RecName: Full=Glycerol-3-phosphate dehydrogenase [NAD(+)] 1, chloroplastic;^Eukaryota; Viridiplantae; Streptophyta; Embryophyta; Tracheophyta; Spermatophyta; Magnoliophyta; eudicotyledons; core eudicotyledons; rosids; malvids; Brassicales; Brassicaceae; Camelineae; Arabidopsis	PF01210.18	NAD_Gly3P_dh_N	NAD-dependent glycerol-3-phosphate dehydrogenase N-terminus	COG0240	Glycerol-3-phosphate dehydrogenase	.	c45536_g1|m.19403	125-1234[+]	.	.	GO:0005975|carbohydrate metabolic process;GO:0046168|glycerol-3-phosphate catabolic process;GO:0006650|glycerophospholipid metabolic process;GO:0008654|phospholipid biosynthetic process	GO:0004367|glycerol-3-phosphate dehydrogenase [NAD+] activity;GO:0051287|NAD binding	GO:0009507|chloroplast;GO:0009331|glycerol-3-phosphate dehydrogenase complex	K00006|GPD1; glycerol-3-phosphate dehydrogenase (NAD+) [EC:1.1.1.8]	map01110|Biosynthesis of secondary metabolites;map00564|Glycerophospholipid metabolism
c52385_g1	92.8327	6.53656	7.06496e-07	9.45435e-05	up	yes	gi|30690653|ref|NM_119806.2|	401	0	Arabidopsis thaliana peroxidase 49 mRNA, complete cds	gi|7453851|gb|AAF63025.1|AF244922_1	595	1e-102	peroxidase prx13 precursor [Spinacia oleracea]	sp|O23237|PER49_ARATH	299	E:1e-96	RecName: Full=Peroxidase 49;^Eukaryota; Viridiplantae; Streptophyta; Embryophyta; Tracheophyta; Spermatophyta; Magnoliophyta; eudicotyledons; core eudicotyledons; rosids; malvids; Brassicales; Brassicaceae; Camelineae; Arabidopsis`sp|O23237|PER49_ARATH	sp|O23237|PER49_ARATH	267	E:9e-88	RecName: Full=Peroxidase 49;^Eukaryota; Viridiplantae; Streptophyta; Embryophyta; Tracheophyta; Spermatophyta; Magnoliophyta; eudicotyledons; core eudicotyledons; rosids; malvids; Brassicales; Brassicaceae; Camelineae; Arabidopsis	PF00141.18	peroxidase	Peroxidase	NOG260566	Has a glutathione-disulfide oxidoreductase activity in the presence of NADPH and glutathione reductase. Reduces low molecular weight disulfides and proteins (By similarity)	.	c52385_g1|m.19669	95-643[-]	.	.	GO:0042744|hydrogen peroxide catabolic process	GO:0020037|heme binding;GO:0046872|metal ion binding;GO:0004601|peroxidase activity	GO:0005618|cell wall;GO:0005576|extracellular region	K00430|E1.11.1.7; peroxidase [EC:1.11.1.7]	map01100|Metabolic pathways;map00940|Phenylpropanoid biosynthesis;map01110|Biosynthesis of secondary metabolites
c52385_g1	92.8327	6.53656	7.06496e-07	9.45435e-05	up	yes	gi|30690653|ref|NM_119806.2|	401	0	Arabidopsis thaliana peroxidase 49 mRNA, complete cds	gi|7453851|gb|AAF63025.1|AF244922_1	595	1e-102	peroxidase prx13 precursor [Spinacia oleracea]	sp|O23237|PER49_ARATH	299	E:1e-96	RecName: Full=Peroxidase 49;^Eukaryota; Viridiplantae; Streptophyta; Embryophyta; Tracheophyta; Spermatophyta; Magnoliophyta; eudicotyledons; core eudicotyledons; rosids; malvids; Brassicales; Brassicaceae; Camelineae; Arabidopsis`sp|O23237|PER49_ARATH	sp|O23237|PER49_ARATH	349	E:3e-119	RecName: Full=Peroxidase 49;^Eukaryota; Viridiplantae; Streptophyta; Embryophyta; Tracheophyta; Spermatophyta; Magnoliophyta; eudicotyledons; core eudicotyledons; rosids; malvids; Brassicales; Brassicaceae; Camelineae; Arabidopsis	PF00141.18	peroxidase	Peroxidase	NOG260566	Has a glutathione-disulfide oxidoreductase activity in the presence of NADPH and glutathione reductase. Reduces low molecular weight disulfides and proteins (By similarity)	.	c52385_g1|m.19668	561-1238[-]	.	ExpAA=22.36^PredHel=1^Topology=i12-34o	GO:0042744|hydrogen peroxide catabolic process	GO:0020037|heme binding;GO:0046872|metal ion binding;GO:0004601|peroxidase activity	GO:0005618|cell wall;GO:0005576|extracellular region	K00430|E1.11.1.7; peroxidase [EC:1.11.1.7]	map01100|Metabolic pathways;map00940|Phenylpropanoid biosynthesis;map01110|Biosynthesis of secondary metabolites
c44559_g1	29.2215	4.86896	0.00111954	0.0169481	up	yes	gi|254583469|ref|XM_002497258.1|	75	7e-30	Zygosaccharomyces rouxii 60S ribosomal protein L10, partial mRNA	gi|671692700|emb|CDS07431.1|	825	6e-108	Putative 60S ribosomal protein L10-A [Absidia idahoensis var. thermophila]	sp|Q54J69|RL10_DICDI	318	E:1e-107	RecName: Full=60S ribosomal protein L10;^Eukaryota; Amoebozoa; Mycetozoa; Dictyosteliida; Dictyostelium	sp|Q54J69|RL10_DICDI	318	E:7e-109	RecName: Full=60S ribosomal protein L10;^Eukaryota; Amoebozoa; Mycetozoa; Dictyosteliida; Dictyostelium	PF00252.13	Ribosomal_L16	Ribosomal protein L16p/L10e	COG0197	Ribosomal protein L16/L10E	.	c44559_g1|m.19673	53-697[+]	.	.	GO:0006412|translation	GO:0003735|structural constituent of ribosome	GO:0005840|ribosome	K02866|RP-L10e, RPL10; large subunit ribosomal protein L10e	map03010|Ribosome
c51930_g1	2.84115	1.50648	0.00123403	0.0179683	up	yes	gi|297831643|ref|XM_002883658.1|	1407	0	Arabidopsis lyrata subsp. lyrata hypothetical protein, mRNA	gi|297831644|ref|XP_002883704.1|	2896	0	hypothetical protein ARALYDRAFT_480186 [Arabidopsis lyrata subsp. lyrata]	sp|Q9SIB9|ACO2M_ARATH	1102	E:0	RecName: Full=Aconitate hydratase 2, mitochondrial;^Eukaryota; Viridiplantae; Streptophyta; Embryophyta; Tracheophyta; Spermatophyta; Magnoliophyta; eudicotyledons; core eudicotyledons; rosids; malvids; Brassicales; Brassicaceae; Camelineae; Arabidopsis`sp|Q9SIB9|ACO2M_ARATH	sp|Q9SIB9|ACO2M_ARATH	1137	E:0	RecName: Full=Aconitate hydratase 2, mitochondrial;^Eukaryota; Viridiplantae; Streptophyta; Embryophyta; Tracheophyta; Spermatophyta; Magnoliophyta; eudicotyledons; core eudicotyledons; rosids; malvids; Brassicales; Brassicaceae; Camelineae; Arabidopsis	PF00330.15	Aconitase	Aconitase family (aconitate hydratase)	COG1048	Aconitase A	.	c51930_g1|m.19709	545-2470[-]	.	.	GO:0006101|citrate metabolic process;GO:0006097|glyoxylate cycle;GO:0006102|isocitrate metabolic process;GO:0009737|response to abscisic acid stimulus;GO:0046686|response to cadmium ion;GO:0006979|response to oxidative stress;GO:0009651|response to salt stress;GO:0006099|tricarboxylic acid cycle	GO:0051539|4 iron, 4 sulfur cluster binding;GO:0003994|aconitate hydratase activity;GO:0005524|ATP binding;GO:0052632|citrate hydro-lyase (cis-aconitate-forming) activity;GO:0005507|copper ion binding;GO:0052633|isocitrate hydro-lyase (cis-aconitate-forming) activity	GO:0005618|cell wall;GO:0009570|chloroplast stroma;GO:0005829|cytosol;GO:0005739|mitochondrion;GO:0005774|vacuolar membrane	K01681|ACO, acnA; aconitate hydratase [EC:4.2.1.3]	map01200|Carbon metabolism;map00630|Glyoxylate and dicarboxylate metabolism;map00020|Citrate cycle (TCA cycle);map01210|2-Oxocarboxylic acid metabolism;map01230|Biosynthesis of amino acids;map00720|Carbon fixation pathways in prokaryotes;map01110|Biosynthesis of secondary metabolites;map01100|Metabolic pathways;map01120|Microbial metabolism in diverse environments;map01130|Biosynthesis of antibio…
c52258_g1	2.12319	1.08623	0.000764366	0.0132274	up	yes	gi|334185712|ref|NM_001203077.1|	2615	0	Arabidopsis thaliana brefeldin A-inhibited guanine nucleotide-exchange protein 5 mRNA, complete cds	gi|449061867|sp|F4IXW2.2|BIG5_ARATH	8487	0	RecName: Full=Brefeldin A-inhibited guanine nucleotide-exchange protein 5; Short=BIG5; AltName: Full=ARF guanine-nucleotide exchange factor BIG5; AltName: Full=Protein BFA-VISUALIZED ENDOCYTIC TRAFFICKING DEFECTIVE 1; Short=Protein BEN1; AltName: Full=Protein HOPM INTERACTOR 7	sp|Q9Y6D5|BIG2_HUMAN	664	E:0	RecName: Full=Brefeldin A-inhibited guanine nucleotide-exchange protein 2;^Eukaryota; Metazoa; Chordata; Craniata; Vertebrata; Euteleostomi; Mammalia; Eutheria; Euarchontoglires; Primates; Haplorrhini; Catarrhini; Hominidae; Homo	sp|Q7TSU1|BIG2_RAT	119	E:1e-26	RecName: Full=Brefeldin A-inhibited guanine nucleotide-exchange protein 2;^Eukaryota; Metazoa; Chordata; Craniata; Vertebrata; Euteleostomi; Mammalia; Eutheria; Euarchontoglires; Glires; Rodentia; Sciurognathi; Muroidea; Muridae; Murinae; Rattus	PF09324.5	DUF1981	Domain of unknown function (DUF1981)	COG5307	SEC7 domain proteins	.	c52258_g1|m.20357	3614-5488[+]	.	.	GO:0010256|endomembrane system organization;GO:0007032|endosome organization;GO:0006887|exocytosis;GO:0006893|Golgi to plasma membrane transport;GO:0035556|intracellular signal transduction;GO:0032760|positive regulation of tumor necrosis factor production;GO:0015031|protein transport;GO:0001881|receptor recycling;GO:0032012|regulation of ARF protein signal transduction	GO:0005086|ARF guanyl-nucleotide exchange factor activity;GO:0050811|GABA receptor binding;GO:0034237|protein kinase A regulatory subunit binding	GO:0032279|asymmetric synapse;GO:0005879|axonemal microtubule;GO:0030054|cell junction;GO:0016023|cytoplasmic membrane-bounded vesicle;GO:0031410|cytoplasmic vesicle;GO:0005829|cytosol;GO:0043197|dendritic spine;GO:0000139|Golgi membrane;GO:0005815|microtubule organizing center;GO:0048471|perinuclear region of cytoplasm;GO:0055037|recycling endosome;GO:0032280|symmetric synapse;GO:0005802|trans-G…	K18442|ARFGEF, BIG; brefeldin A-inhibited guanine nucleotide-exchange protein	map04144|Endocytosis
c52258_g1	2.12319	1.08623	0.000764366	0.0132274	up	yes	gi|334185712|ref|NM_001203077.1|	2615	0	Arabidopsis thaliana brefeldin A-inhibited guanine nucleotide-exchange protein 5 mRNA, complete cds	gi|449061867|sp|F4IXW2.2|BIG5_ARATH	8487	0	RecName: Full=Brefeldin A-inhibited guanine nucleotide-exchange protein 5; Short=BIG5; AltName: Full=ARF guanine-nucleotide exchange factor BIG5; AltName: Full=Protein BFA-VISUALIZED ENDOCYTIC TRAFFICKING DEFECTIVE 1; Short=Protein BEN1; AltName: Full=Protein HOPM INTERACTOR 7	sp|Q9Y6D5|BIG2_HUMAN	664	E:0	RecName: Full=Brefeldin A-inhibited guanine nucleotide-exchange protein 2;^Eukaryota; Metazoa; Chordata; Craniata; Vertebrata; Euteleostomi; Mammalia; Eutheria; Euarchontoglires; Primates; Haplorrhini; Catarrhini; Hominidae; Homo	sp|Q9Y6D5|BIG2_HUMAN	564	E:4e-174	RecName: Full=Brefeldin A-inhibited guanine nucleotide-exchange protein 2;^Eukaryota; Metazoa; Chordata; Craniata; Vertebrata; Euteleostomi; Mammalia; Eutheria; Euarchontoglires; Primates; Haplorrhini; Catarrhini; Hominidae; Homo	PF12783.2	Sec7_N	Guanine nucleotide exchange factor in Golgi transport N-terminal	COG5307	SEC7 domain proteins	.	c52258_g1|m.20356	194-3571[+]	.	.	GO:0010256|endomembrane system organization;GO:0007032|endosome organization;GO:0006887|exocytosis;GO:0006893|Golgi to plasma membrane transport;GO:0035556|intracellular signal transduction;GO:0032760|positive regulation of tumor necrosis factor production;GO:0015031|protein transport;GO:0001881|receptor recycling;GO:0032012|regulation of ARF protein signal transduction	GO:0005086|ARF guanyl-nucleotide exchange factor activity;GO:0050811|GABA receptor binding;GO:0034237|protein kinase A regulatory subunit binding	GO:0032279|asymmetric synapse;GO:0005879|axonemal microtubule;GO:0030054|cell junction;GO:0016023|cytoplasmic membrane-bounded vesicle;GO:0031410|cytoplasmic vesicle;GO:0005829|cytosol;GO:0043197|dendritic spine;GO:0000139|Golgi membrane;GO:0005815|microtubule organizing center;GO:0048471|perinuclear region of cytoplasm;GO:0055037|recycling endosome;GO:0032280|symmetric synapse;GO:0005802|trans-G…	K18442|ARFGEF, BIG; brefeldin A-inhibited guanine nucleotide-exchange protein	map04144|Endocytosis
c33357_g1	40.6344	5.34463	4.03122e-05	0.00188354	up	yes	gi|30696214|ref|NM_148121.2|	188	1e-92	Arabidopsis thaliana transcription factor MYB82 mRNA, complete cds	gi|6491896|gb|AAF14064.1|AF048841_1	542	3e-71	MYB82 [Arabidopsis thaliana]	sp|Q9LTF7|MYB82_ARATH	212	E:4e-72	RecName: Full=Transcription factor MYB82;^Eukaryota; Viridiplantae; Streptophyta; Embryophyta; Tracheophyta; Spermatophyta; Magnoliophyta; eudicotyledons; core eudicotyledons; rosids; malvids; Brassicales; Brassicaceae; Camelineae; Arabidopsis`sp|Q9LTF7|MYB82_ARATH	sp|Q9LTF7|MYB82_ARATH	232	E:7e-76	RecName: Full=Transcription factor MYB82;^Eukaryota; Viridiplantae; Streptophyta; Embryophyta; Tracheophyta; Spermatophyta; Magnoliophyta; eudicotyledons; core eudicotyledons; rosids; malvids; Brassicales; Brassicaceae; Camelineae; Arabidopsis	PF00249.26	Myb_DNA-binding	Myb-like DNA-binding domain	COG5147	Myb superfamily proteins, including transcription factors and mRNA splicing factors	.	c33357_g1|m.20502	162-671[+]	sigP:1^16^0.708^YES	.	GO:0007275|multicellular organismal development;GO:0006355|regulation of transcription, DNA-dependent;GO:0006351|transcription, DNA-dependent	GO:0003682|chromatin binding;GO:0003677|DNA binding	GO:0005634|nucleus	K09422|MYBP; myb proto-oncogene protein, plant	.
c41242_g1	51.4831	5.68603	1.97511e-06	0.000201659	up	yes	gi|567152929|ref|XM_006417280.1|	598	0	Eutrema salsugineum hypothetical protein (EUTSA_v10007263mg) mRNA, complete cds	gi|6554190|gb|AAF16636.1|AC011661_14	1437	0	T23J18.23 [Arabidopsis thaliana]	sp|Q1JPL7|PME18_ARATH	546	E:0	RecName: Full=Pectinesterase/pectinesterase inhibitor 18;^Eukaryota; Viridiplantae; Streptophyta; Embryophyta; Tracheophyta; Spermatophyta; Magnoliophyta; eudicotyledons; core eudicotyledons; rosids; malvids; Brassicales; Brassicaceae; Camelineae; Arabidopsis`sp|Q1JPL7|PME18_ARATH	sp|Q1JPL7|PME18_ARATH	215	E:1e-66	RecName: Full=Pectinesterase/pectinesterase inhibitor 18;^Eukaryota; Viridiplantae; Streptophyta; Embryophyta; Tracheophyta; Spermatophyta; Magnoliophyta; eudicotyledons; core eudicotyledons; rosids; malvids; Brassicales; Brassicaceae; Camelineae; Arabidopsis	PF01095.14	Pectinesterase	Pectinesterase	COG4677	Pectin methylesterase	.	c41242_g1|m.20596	1291-1605[+]	.	.	GO:0042545|cell wall modification;GO:0050832|defense response to fungus;GO:0031640|killing of cells of other organism;GO:0043086|negative regulation of catalytic activity;GO:0017148|negative regulation of translation;GO:0045490|pectin catabolic process	GO:0045330|aspartyl esterase activity;GO:0004857|enzyme inhibitor activity;GO:0030599|pectinesterase activity;GO:0030598|rRNA N-glycosylase activity	GO:0005618|cell wall;GO:0005829|cytosol;GO:0005576|extracellular region;GO:0005774|vacuolar membrane	K01051|E3.1.1.11; pectinesterase [EC:3.1.1.11]	map01100|Metabolic pathways;map00040|Pentose and glucuronate interconversions;map00500|Starch and sucrose metabolism
c41242_g1	51.4831	5.68603	1.97511e-06	0.000201659	up	yes	gi|567152929|ref|XM_006417280.1|	598	0	Eutrema salsugineum hypothetical protein (EUTSA_v10007263mg) mRNA, complete cds	gi|6554190|gb|AAF16636.1|AC011661_14	1437	0	T23J18.23 [Arabidopsis thaliana]	sp|Q1JPL7|PME18_ARATH	546	E:0	RecName: Full=Pectinesterase/pectinesterase inhibitor 18;^Eukaryota; Viridiplantae; Streptophyta; Embryophyta; Tracheophyta; Spermatophyta; Magnoliophyta; eudicotyledons; core eudicotyledons; rosids; malvids; Brassicales; Brassicaceae; Camelineae; Arabidopsis`sp|Q1JPL7|PME18_ARATH	sp|Q1JPL7|PME18_ARATH	545	E:0	RecName: Full=Pectinesterase/pectinesterase inhibitor 18;^Eukaryota; Viridiplantae; Streptophyta; Embryophyta; Tracheophyta; Spermatophyta; Magnoliophyta; eudicotyledons; core eudicotyledons; rosids; malvids; Brassicales; Brassicaceae; Camelineae; Arabidopsis	PF04043.10	PMEI	Plant invertase/pectin methylesterase inhibitor	COG4677	Pectin methylesterase	.	c41242_g1|m.20595	158-1147[+]	.	ExpAA=20.86^PredHel=1^Topology=i20-39o	GO:0042545|cell wall modification;GO:0050832|defense response to fungus;GO:0031640|killing of cells of other organism;GO:0043086|negative regulation of catalytic activity;GO:0017148|negative regulation of translation;GO:0045490|pectin catabolic process	GO:0045330|aspartyl esterase activity;GO:0004857|enzyme inhibitor activity;GO:0030599|pectinesterase activity;GO:0030598|rRNA N-glycosylase activity	GO:0005618|cell wall;GO:0005829|cytosol;GO:0005576|extracellular region;GO:0005774|vacuolar membrane	K01051|E3.1.1.11; pectinesterase [EC:3.1.1.11]	map01100|Metabolic pathways;map00040|Pentose and glucuronate interconversions;map00500|Starch and sucrose metabolism
c39027_g1	15.0795	3.91452	6.38345e-07	8.71151e-05	up	yes	gi|567150744|ref|XM_006416668.1|	513	0	Eutrema salsugineum hypothetical protein (EUTSA_v10008734mg) mRNA, complete cds	gi|685349679|ref|XP_009110423.1|	1082	2e-146	PREDICTED: glutathione S-transferase U26 [Brassica rapa]	sp|Q9SHH8|GSTUQ_ARATH	399	E:5e-139	RecName: Full=Glutathione S-transferase U26;^Eukaryota; Viridiplantae; Streptophyta; Embryophyta; Tracheophyta; Spermatophyta; Magnoliophyta; eudicotyledons; core eudicotyledons; rosids; malvids; Brassicales; Brassicaceae; Camelineae; Arabidopsis	sp|Q9SHH8|GSTUQ_ARATH	399	E:3e-140	RecName: Full=Glutathione S-transferase U26;^Eukaryota; Viridiplantae; Streptophyta; Embryophyta; Tracheophyta; Spermatophyta; Magnoliophyta; eudicotyledons; core eudicotyledons; rosids; malvids; Brassicales; Brassicaceae; Camelineae; Arabidopsis	PF02798.15	GST_N	Glutathione S-transferase, N-terminal domain	COG0625	Glutathione S-transferase	.	c39027_g1|m.20607	217-903[-]	.	.	GO:0009409|response to cold;GO:0009635|response to herbicide;GO:0009407|toxin catabolic process	GO:0004364|glutathione transferase activity	GO:0005737|cytoplasm;GO:0005829|cytosol	K00799|GST, gst; glutathione S-transferase [EC:2.5.1.18]	map05204|Chemical carcinogenesis;map00982|Drug metabolism - cytochrome P450;map00480|Glutathione metabolism;map00980|Metabolism of xenobiotics by cytochrome P450
c51551_g3	3.64826	1.86721	0.000945516	0.0151109	up	yes	gi|297792806|ref|XM_002864242.1|	2170	0	Arabidopsis lyrata subsp. lyrata hypothetical protein, mRNA	gi|727623900|ref|XP_010482792.1|	4322	0	PREDICTED: phytosulfokine receptor 2 [Camelina sativa]	sp|Q9FN37|PSKR2_ARATH	1665	E:0	RecName: Full=Phytosulfokine receptor 2;^Eukaryota; Viridiplantae; Streptophyta; Embryophyta; Tracheophyta; Spermatophyta; Magnoliophyta; eudicotyledons; core eudicotyledons; rosids; malvids; Brassicales; Brassicaceae; Camelineae; Arabidopsis	sp|Q9FN37|PSKR2_ARATH	1811	E:0	RecName: Full=Phytosulfokine receptor 2;^Eukaryota; Viridiplantae; Streptophyta; Embryophyta; Tracheophyta; Spermatophyta; Magnoliophyta; eudicotyledons; core eudicotyledons; rosids; malvids; Brassicales; Brassicaceae; Camelineae; Arabidopsis	PF08263.7	LRRNT_2	Leucine rich repeat N-terminal domain	COG4886	Leucine-rich repeat (LRR) protein	.	c51551_g3|m.20677	664-3789[-]	sigP:1^16^0.904^YES	ExpAA=18.99^PredHel=1^Topology=o683-705i	GO:0009611|response to wounding	GO:0005524|ATP binding;GO:0001653|peptide receptor activity;GO:0004674|protein serine/threonine kinase activity	GO:0009507|chloroplast;GO:0016021|integral to membrane;GO:0005886|plasma membrane	.	.
c48900_g1	88.7162	6.47113	1.06435e-06	0.000123801	up	yes	gi|567194495|ref|XM_006405705.1|	713	0	Eutrema salsugineum hypothetical protein (EUTSA_v10027726mg) mRNA, complete cds	gi|297801780|ref|XP_002868774.1|	2296	0	CYP735A1 [Arabidopsis lyrata subsp. lyrata]	sp|Q9FF18|C7351_ARATH	880	E:0	RecName: Full=Cytokinin hydroxylase;^Eukaryota; Viridiplantae; Streptophyta; Embryophyta; Tracheophyta; Spermatophyta; Magnoliophyta; eudicotyledons; core eudicotyledons; rosids; malvids; Brassicales; Brassicaceae; Camelineae; Arabidopsis	sp|Q9FF18|C7351_ARATH	585	E:0	RecName: Full=Cytokinin hydroxylase;^Eukaryota; Viridiplantae; Streptophyta; Embryophyta; Tracheophyta; Spermatophyta; Magnoliophyta; eudicotyledons; core eudicotyledons; rosids; malvids; Brassicales; Brassicaceae; Camelineae; Arabidopsis	PF00067.17	p450	Cytochrome P450	COG2124	Cytochrome P450	.	c48900_g1|m.21232	243-1274[-]	.	.	GO:0033466|trans-zeatin biosynthetic process	GO:0009055|electron carrier activity;GO:0020037|heme binding;GO:0005506|iron ion binding;GO:0004497|monooxygenase activity;GO:0016705|oxidoreductase activity, acting on paired donors, with incorporation or reduction of molecular oxygen	GO:0016021|integral to membrane	K10717|CYP735A; cytokinin trans-hydroxylase	map00908|Zeatin biosynthesis;map01100|Metabolic pathways;map01110|Biosynthesis of secondary metabolites
c48900_g1	88.7162	6.47113	1.06435e-06	0.000123801	up	yes	gi|567194495|ref|XM_006405705.1|	713	0	Eutrema salsugineum hypothetical protein (EUTSA_v10027726mg) mRNA, complete cds	gi|297801780|ref|XP_002868774.1|	2296	0	CYP735A1 [Arabidopsis lyrata subsp. lyrata]	sp|Q9FF18|C7351_ARATH	880	E:0	RecName: Full=Cytokinin hydroxylase;^Eukaryota; Viridiplantae; Streptophyta; Embryophyta; Tracheophyta; Spermatophyta; Magnoliophyta; eudicotyledons; core eudicotyledons; rosids; malvids; Brassicales; Brassicaceae; Camelineae; Arabidopsis	sp|Q9FF18|C7351_ARATH	332	E:7e-111	RecName: Full=Cytokinin hydroxylase;^Eukaryota; Viridiplantae; Streptophyta; Embryophyta; Tracheophyta; Spermatophyta; Magnoliophyta; eudicotyledons; core eudicotyledons; rosids; malvids; Brassicales; Brassicaceae; Camelineae; Arabidopsis	PF00067.17	p450	Cytochrome P450	COG2124	Cytochrome P450	.	c48900_g1|m.21233	1308-1865[-]	.	ExpAA=21.94^PredHel=1^Topology=o10-32i	GO:0033466|trans-zeatin biosynthetic process	GO:0009055|electron carrier activity;GO:0020037|heme binding;GO:0005506|iron ion binding;GO:0004497|monooxygenase activity;GO:0016705|oxidoreductase activity, acting on paired donors, with incorporation or reduction of molecular oxygen	GO:0016021|integral to membrane	K10717|CYP735A; cytokinin trans-hydroxylase	map00908|Zeatin biosynthesis;map01100|Metabolic pathways;map01110|Biosynthesis of secondary metabolites
c45191_g1	3.01354	1.59146	0.00163636	0.0215369	up	yes	gi|567200527|ref|XM_006407387.1|	428	0	Eutrema salsugineum hypothetical protein (EUTSA_v10020827mg) mRNA, complete cds	gi|557805261|pdb|4N0G|A	938	4e-122	Chain A, Crystal Structure Of Pyl13-pp2ca Complex	sp|P49598|P2C37_ARATH	365	E:3e-122	RecName: Full=Protein phosphatase 2C 37;^Eukaryota; Viridiplantae; Streptophyta; Embryophyta; Tracheophyta; Spermatophyta; Magnoliophyta; eudicotyledons; core eudicotyledons; rosids; malvids; Brassicales; Brassicaceae; Camelineae; Arabidopsis	sp|P49598|P2C37_ARATH	404	E:2e-139	RecName: Full=Protein phosphatase 2C 37;^Eukaryota; Viridiplantae; Streptophyta; Embryophyta; Tracheophyta; Spermatophyta; Magnoliophyta; eudicotyledons; core eudicotyledons; rosids; malvids; Brassicales; Brassicaceae; Camelineae; Arabidopsis	PF00481.16	PP2C	Protein phosphatase 2C	COG0631	Serine/threonine protein phosphatase	.	c45191_g1|m.21335	94-843[+]	.	.	GO:0009738|abscisic acid mediated signaling pathway;GO:0009788|negative regulation of abscisic acid mediated signaling pathway;GO:0010360|negative regulation of anion channel activity;GO:0006470|protein dephosphorylation;GO:0010119|regulation of stomatal movement;GO:0009409|response to cold;GO:0009414|response to water deprivation	GO:0046872|metal ion binding;GO:0004722|protein serine/threonine phosphatase activity	GO:0005829|cytosol;GO:0005634|nucleus	K14497|PP2C; protein phosphatase 2C [EC:3.1.3.16]	map04075|Plant hormone signal transduction;map04931|Insulin resistance
c30713_g1	19.6222	4.29441	0.00375154	0.0369616	up	yes	gi|32995864|dbj|AK110655.1|	129	5e-60	Oryza sativa Japonica Group cDNA clone:002-169-E07, full insert sequence	gi|702248733|ref|XP_010058569.1|	808	2e-106	PREDICTED: 40S ribosomal protein S5 [Eucalyptus grandis]	sp|P46782|RS5_HUMAN	318	E:1e-108	RecName: Full=40S ribosomal protein S5;^Eukaryota; Metazoa; Chordata; Craniata; Vertebrata; Euteleostomi; Mammalia; Eutheria; Euarchontoglires; Primates; Haplorrhini; Catarrhini; Hominidae; Homo	sp|P46782|RS5_HUMAN	318	E:5e-109	RecName: Full=40S ribosomal protein S5;^Eukaryota; Metazoa; Chordata; Craniata; Vertebrata; Euteleostomi; Mammalia; Eutheria; Euarchontoglires; Primates; Haplorrhini; Catarrhini; Hominidae; Homo	PF00177.16	Ribosomal_S7	Ribosomal protein S7p/S5e	COG0049	Ribosomal protein S7	.	c30713_g1|m.23727	56-679[-]	.	.	GO:0000184|nuclear-transcribed mRNA catabolic process, nonsense-mediated decay;GO:0006450|regulation of translational fidelity;GO:0006614|SRP-dependent cotranslational protein targeting to membrane;GO:0006414|translational elongation;GO:0006413|translational initiation;GO:0006415|translational termination;GO:0019083|viral transcription	GO:0003729|mRNA binding;GO:0003735|structural constituent of ribosome	GO:0022627|cytosolic small ribosomal subunit	K02989|RP-S5e, RPS5; small subunit ribosomal protein S5e	map03010|Ribosome
c48363_g1	2.51211	1.3289	0.00309126	0.0325503	up	yes	gi|567136567|ref|XM_006393928.1|	287	4e-148	Eutrema salsugineum hypothetical protein (EUTSA_v10003576mg) mRNA, complete cds	gi|567136568|ref|XP_006393990.1|	595	5e-70	hypothetical protein EUTSA_v10003576mg [Eutrema salsugineum]	sp|Q54JE4|ODO1_DICDI	154	E:7e-43	RecName: Full=2-oxoglutarate dehydrogenase, mitochondrial;^Eukaryota; Amoebozoa; Mycetozoa; Dictyosteliida; Dictyostelium	sp|Q54JE4|ODO1_DICDI	154	E:7e-43	RecName: Full=2-oxoglutarate dehydrogenase, mitochondrial;^Eukaryota; Amoebozoa; Mycetozoa; Dictyosteliida; Dictyostelium	PF02779.19	Transket_pyr	Transketolase, pyrimidine binding domain	COG0567	2-oxoglutarate dehydrogenase complex, dehydrogenase (E1) component, and related enzymes	.	c48363_g1|m.24085	2-334[-]	.	.	GO:0006096|glycolysis;GO:0006099|tricarboxylic acid cycle	GO:0004591|oxoglutarate dehydrogenase (succinyl-transferring) activity;GO:0030976|thiamine pyrophosphate binding	GO:0009353|mitochondrial oxoglutarate dehydrogenase complex	K00164|OGDH, sucA; 2-oxoglutarate dehydrogenase E1 component [EC:1.2.4.2]	map01200|Carbon metabolism;map00020|Citrate cycle (TCA cycle);map00310|Lysine degradation;map01110|Biosynthesis of secondary metabolites;map01100|Metabolic pathways;map00380|Tryptophan metabolism;map01120|Microbial metabolism in diverse environments;map01130|Biosynthesis of antibiotics
c43880_g1	3.43406	1.77992	8.22391e-05	0.00308447	up	yes	gi|78370045|gb|DQ226889.1|	558	0	Boechera divaricarpa isolate SLW-D-E07 mRNA sequence	gi|567213344|ref|XP_006410854.1|	1163	4e-157	hypothetical protein EUTSA_v10017134mg [Eutrema salsugineum]	sp|P25818|TIP11_ARATH	445	E:1e-155	RecName: Full=Aquaporin TIP1-1;^Eukaryota; Viridiplantae; Streptophyta; Embryophyta; Tracheophyta; Spermatophyta; Magnoliophyta; eudicotyledons; core eudicotyledons; rosids; malvids; Brassicales; Brassicaceae; Camelineae; Arabidopsis	sp|P25818|TIP11_ARATH	470	E:2e-167	RecName: Full=Aquaporin TIP1-1;^Eukaryota; Viridiplantae; Streptophyta; Embryophyta; Tracheophyta; Spermatophyta; Magnoliophyta; eudicotyledons; core eudicotyledons; rosids; malvids; Brassicales; Brassicaceae; Camelineae; Arabidopsis	PF00230.15	MIP	Major intrinsic protein	COG0580	Glycerol uptake facilitator and related permeases (Major Intrinsic Protein Family)	.	c43880_g1|m.25052	335-1090[-]	.	ExpAA=153.06^PredHel=7^Topology=i21-43o58-80i87-109o113-135i142-164o174-196i217-239o	GO:0080170|hydrogen peroxide transmembrane transport	GO:0015204|urea transmembrane transporter activity;GO:0015250|water channel activity	GO:0042807|central vacuole;GO:0009941|chloroplast envelope;GO:0016021|integral to membrane;GO:0009705|plant-type vacuole membrane;GO:0000326|protein storage vacuole	K09873|TIP; aquaporin TIP	.
c45168_g1	0.19975	-2.32373	3.75647e-05	0.00179354	down	yes	gi|145339383|ref|NM_115051.2|	303	1e-156	Arabidopsis thaliana calmodulin-like protein 9 mRNA, complete cds	gi|567187633|ref|XP_006403868.1|	681	3e-87	hypothetical protein EUTSA_v10010796mg [Eutrema salsugineum]	sp|Q9S744|CML9_ARATH	266	E:4e-88	RecName: Full=Calmodulin-like protein 9;^Eukaryota; Viridiplantae; Streptophyta; Embryophyta; Tracheophyta; Spermatophyta; Magnoliophyta; eudicotyledons; core eudicotyledons; rosids; malvids; Brassicales; Brassicaceae; Camelineae; Arabidopsis	sp|Q9S744|CML9_ARATH	266	E:1e-89	RecName: Full=Calmodulin-like protein 9;^Eukaryota; Viridiplantae; Streptophyta; Embryophyta; Tracheophyta; Spermatophyta; Magnoliophyta; eudicotyledons; core eudicotyledons; rosids; malvids; Brassicales; Brassicaceae; Camelineae; Arabidopsis	PF13833.1	EF-hand_8	EF-hand domain pair	COG5126	Ca2+-binding protein (EF-Hand superfamily)	.	c45168_g1|m.25265	149-694[+]	.	.	GO:0019722|calcium-mediated signaling;GO:0005513|detection of calcium ion;GO:0009737|response to abscisic acid stimulus;GO:0009651|response to salt stress;GO:0009414|response to water deprivation	GO:0005509|calcium ion binding	GO:0005829|cytosol;GO:0005634|nucleus	K13448|CML; calcium-binding protein CML	map04626|Plant-pathogen interaction
c50129_g4	3.12261	1.64275	0.000194995	0.00548513	up	yes	gi|297830297|ref|XM_002882985.1|	406	0	Arabidopsis lyrata subsp. lyrata hypothetical protein, mRNA	gi|42570473|ref|NP_850600.2|	744	2e-91	response regulator 1 [Arabidopsis thaliana]	sp|Q940D0|ARR1_ARATH	291	E:2e-92	RecName: Full=Two-component response regulator ARR1;^Eukaryota; Viridiplantae; Streptophyta; Embryophyta; Tracheophyta; Spermatophyta; Magnoliophyta; eudicotyledons; core eudicotyledons; rosids; malvids; Brassicales; Brassicaceae; Camelineae; Arabidopsis	sp|Q940D0|ARR1_ARATH	385	E:5e-129	RecName: Full=Two-component response regulator ARR1;^Eukaryota; Viridiplantae; Streptophyta; Embryophyta; Tracheophyta; Spermatophyta; Magnoliophyta; eudicotyledons; core eudicotyledons; rosids; malvids; Brassicales; Brassicaceae; Camelineae; Arabidopsis	PF00072.19	Response_reg	Response regulator receiver domain	COG0745	Response regulators consisting of a CheY-like receiver domain and a winged-helix DNA-binding domain	.	c50129_g4|m.25477	1-621[+]	.	.	GO:0009736|cytokinin mediated signaling pathway;GO:0080022|primary root development;GO:0031537|regulation of anthocyanin metabolic process;GO:0010380|regulation of chlorophyll biosynthetic process;GO:0048367|shoot development;GO:0006351|transcription, DNA-dependent	GO:0003682|chromatin binding;GO:0003677|DNA binding;GO:0000156|phosphorelay response regulator activity;GO:0003700|sequence-specific DNA binding transcription factor activity	GO:0005634|nucleus	K14491|ARR-B; two-component response regulator ARR-B family	map04075|Plant hormone signal transduction
c44977_g1	3.5626	1.83293	0.000564705	0.0109346	up	yes	gi|567201571|ref|XM_006407677.1|	810	0	Eutrema salsugineum hypothetical protein (EUTSA_v10020004mg) mRNA, complete cds	gi|567201572|ref|XP_006407740.1|	1400	0	hypothetical protein EUTSA_v10020004mg [Eutrema salsugineum]	sp|Q3ACF5|DDL_CARHZ	82.8	E:8e-19	RecName: Full=D-alanine--D-alanine ligase;^Bacteria; Firmicutes; Clostridia; Thermoanaerobacterales; Thermoanaerobacteraceae; Carboxydothermus`sp|Q3ACF5|DDL_CARHZ	sp|B2UCX5|DDL_RALPJ	87.4	E:2e-18	RecName: Full=D-alanine--D-alanine ligase;^Bacteria; Proteobacteria; Betaproteobacteria; Burkholderiales; Burkholderiaceae; Ralstonia	PF01820.16	Dala_Dala_lig_N	D-ala D-ala ligase N-terminus	COG1181	D-alanine-D-alanine ligase and related ATP-grasp enzymes	.	c44977_g1|m.25512	314-1303[-]	.	.	GO:0009252|peptidoglycan biosynthetic process;GO:0008360|regulation of cell shape	GO:0005524|ATP binding;GO:0008716|D-alanine-D-alanine ligase activity;GO:0046872|metal ion binding	GO:0005618|cell wall;GO:0005737|cytoplasm	K01921|ddl; D-alanine-D-alanine ligase [EC:6.3.2.4]	map01100|Metabolic pathways;map01502|Vancomycin resistance;map00473|D-Alanine metabolism;map00550|Peptidoglycan biosynthesis;map00520|Amino sugar and nucleotide sugar metabolism;map00471|D-Glutamine and D-glutamate metabolism
c52947_g1	3.08932	1.62729	9.51946e-05	0.00344351	up	yes	gi|567186629|ref|XM_006403513.1|	2089	0	Eutrema salsugineum hypothetical protein (EUTSA_v10010080mg) mRNA, complete cds	gi|674241919|gb|KFK34684.1|	4604	0	hypothetical protein AALP_AA5G178000 [Arabis alpina]	sp|A5F5U6|BGAL_VIBC3	626	E:0	RecName: Full=Beta-galactosidase;^Bacteria; Proteobacteria; Gammaproteobacteria; Vibrionales; Vibrionaceae; Vibrio	sp|A5F5U6|BGAL_VIBC3	627	E:0	RecName: Full=Beta-galactosidase;^Bacteria; Proteobacteria; Gammaproteobacteria; Vibrionales; Vibrionaceae; Vibrio	PF02837.13	Glyco_hydro_2_N	Glycosyl hydrolases family 2, sugar binding domain	COG3250	Beta-galactosidase/beta-glucuronidase	.	c52947_g1|m.26087	59-2857[+]	.	.	GO:0005975|carbohydrate metabolic process	GO:0004565|beta-galactosidase activity;GO:0030246|carbohydrate binding;GO:0046872|metal ion binding	GO:0009341|beta-galactosidase complex	K01190|lacZ; beta-galactosidase [EC:3.2.1.23]	map01100|Metabolic pathways;map00511|Other glycan degradation;map00052|Galactose metabolism;map00600|Sphingolipid metabolism
c39143_g1	42.415	5.4065	0.000110385	0.00377073	up	yes	gi|567205995|ref|XM_006408848.1|	282	4e-145	Eutrema salsugineum hypothetical protein (EUTSA_v10002104mg) mRNA, complete cds	gi|567205996|ref|XP_006408911.1|	742	5e-97	hypothetical protein EUTSA_v10002104mg [Eutrema salsugineum]	sp|P33154|PR1_ARATH	102	E:3e-25	RecName: Full=Pathogenesis-related protein 1;^Eukaryota; Viridiplantae; Streptophyta; Embryophyta; Tracheophyta; Spermatophyta; Magnoliophyta; eudicotyledons; core eudicotyledons; rosids; malvids; Brassicales; Brassicaceae; Camelineae; Arabidopsis	sp|P33154|PR1_ARATH	116	E:3e-31	RecName: Full=Pathogenesis-related protein 1;^Eukaryota; Viridiplantae; Streptophyta; Embryophyta; Tracheophyta; Spermatophyta; Magnoliophyta; eudicotyledons; core eudicotyledons; rosids; malvids; Brassicales; Brassicaceae; Camelineae; Arabidopsis	PF00188.21	CAP	Cysteine-rich secretory protein family	COG2340	Uncharacterized protein with SCP/PR1 domains	.	c39143_g1|m.26335	52-591[+]	sigP:1^25^0.626^YES	.	GO:0010266|response to vitamin B1;GO:0009627|systemic acquired resistance	.	GO:0048046|apoplast;GO:0005618|cell wall	K13449|PR1; pathogenesis-related protein 1	map04626|Plant-pathogen interaction;map04075|Plant hormone signal transduction
c49570_g1	4.43349	2.14844	6.36722e-05	0.00258125	up	yes	gi|567216373|ref|XM_006411753.1|	1264	0	Eutrema salsugineum hypothetical protein (EUTSA_v10024871mg) mRNA, complete cds	gi|567216374|ref|XP_006411816.1|	2608	0	hypothetical protein EUTSA_v10024871mg [Eutrema salsugineum]	sp|Q8VYN6|K6PF5_ARATH	891	E:0	RecName: Full=6-phosphofructokinase 5, chloroplastic;^Eukaryota; Viridiplantae; Streptophyta; Embryophyta; Tracheophyta; Spermatophyta; Magnoliophyta; eudicotyledons; core eudicotyledons; rosids; malvids; Brassicales; Brassicaceae; Camelineae; Arabidopsis	sp|Q8VYN6|K6PF5_ARATH	929	E:0	RecName: Full=6-phosphofructokinase 5, chloroplastic;^Eukaryota; Viridiplantae; Streptophyta; Embryophyta; Tracheophyta; Spermatophyta; Magnoliophyta; eudicotyledons; core eudicotyledons; rosids; malvids; Brassicales; Brassicaceae; Camelineae; Arabidopsis	PF00365.15	PFK	Phosphofructokinase	COG0205	6-phosphofructokinase	.	c49570_g1|m.27012	2-1645[+]	.	.	GO:0006002|fructose 6-phosphate metabolic process;GO:0006096|glycolysis	GO:0003872|6-phosphofructokinase activity;GO:0005524|ATP binding	GO:0005945|6-phosphofructokinase complex;GO:0009507|chloroplast	K00850|pfkA, PFK; 6-phosphofructokinase 1 [EC:2.7.1.11]	map00030|Pentose phosphate pathway;map04152|AMPK signaling pathway;map00052|Galactose metabolism;map00680|Methane metabolism;map01200|Carbon metabolism;map01230|Biosynthesis of amino acids;map00010|Glycolysis / Gluconeogenesis;map05230|Central carbon metabolism in cancer;map01110|Biosynthesis of secondary metabolites;map03018|RNA degradation;map00051|Fructose and mannose metabolism;map01100|Metab…
c52592_g3	18.5047	4.20982	1.70022e-06	0.000178213	up	yes	gi|567218131|ref|XM_006412632.1|	299	2e-154	Eutrema salsugineum hypothetical protein (EUTSA_v10024678mg) mRNA, complete cds	gi|567218132|ref|XP_006412695.1|	368	3e-37	hypothetical protein EUTSA_v10024678mg [Eutrema salsugineum]	sp|Q8VYT3|Y4052_ARATH	141	E:1e-36	RecName: Full=Probable LRR receptor-like serine/threonine-protein kinase At4g30520;^Eukaryota; Viridiplantae; Streptophyta; Embryophyta; Tracheophyta; Spermatophyta; Magnoliophyta; eudicotyledons; core eudicotyledons; rosids; malvids; Brassicales; Brassicaceae; Camelineae; Arabidopsis	sp|Q8VYT3|Y4052_ARATH	182	E:8e-54	RecName: Full=Probable LRR receptor-like serine/threonine-protein kinase At4g30520;^Eukaryota; Viridiplantae; Streptophyta; Embryophyta; Tracheophyta; Spermatophyta; Magnoliophyta; eudicotyledons; core eudicotyledons; rosids; malvids; Brassicales; Brassicaceae; Camelineae; Arabidopsis	PF08263.7	LRRNT_2	Leucine rich repeat N-terminal domain	COG0515	Serine/threonine protein kinase	.	c52592_g3|m.27055	468-788[+]	sigP:1^31^0.879^YES	ExpAA=17.22^PredHel=1^Topology=i12-31o	GO:0010150|leaf senescence	GO:0005524|ATP binding;GO:0004674|protein serine/threonine kinase activity	GO:0016021|integral to membrane;GO:0005886|plasma membrane	.	.
c45439_g1	6.51215	2.70313	0.00103502	0.0161382	up	yes	gi|567217593|ref|XM_006412363.1|	1021	0	Eutrema salsugineum hypothetical protein (EUTSA_v10025143mg) mRNA, complete cds	gi|567217594|ref|XP_006412426.1|	2225	0	hypothetical protein EUTSA_v10025143mg [Eutrema salsugineum]	sp|Q9M076|K6PF6_ARATH	849	E:0	RecName: Full=6-phosphofructokinase 6;^Eukaryota; Viridiplantae; Streptophyta; Embryophyta; Tracheophyta; Spermatophyta; Magnoliophyta; eudicotyledons; core eudicotyledons; rosids; malvids; Brassicales; Brassicaceae; Camelineae; Arabidopsis`sp|Q9M076|K6PF6_ARATH	sp|Q9M076|K6PF6_ARATH	675	E:0	RecName: Full=6-phosphofructokinase 6;^Eukaryota; Viridiplantae; Streptophyta; Embryophyta; Tracheophyta; Spermatophyta; Magnoliophyta; eudicotyledons; core eudicotyledons; rosids; malvids; Brassicales; Brassicaceae; Camelineae; Arabidopsis	PF00365.15	PFK	Phosphofructokinase	COG0205	6-phosphofructokinase	.	c45439_g1|m.27155	1005-2033[+]	.	.	GO:0006002|fructose 6-phosphate metabolic process;GO:0006096|glycolysis	GO:0003872|6-phosphofructokinase activity;GO:0005524|ATP binding	GO:0005945|6-phosphofructokinase complex;GO:0005829|cytosol	K00850|pfkA, PFK; 6-phosphofructokinase 1 [EC:2.7.1.11]	map00030|Pentose phosphate pathway;map04152|AMPK signaling pathway;map00052|Galactose metabolism;map00680|Methane metabolism;map01200|Carbon metabolism;map01230|Biosynthesis of amino acids;map00010|Glycolysis / Gluconeogenesis;map05230|Central carbon metabolism in cancer;map01110|Biosynthesis of secondary metabolites;map03018|RNA degradation;map00051|Fructose and mannose metabolism;map01100|Metab…
c48378_g1	0.146339	-2.77261	4.34453e-06	0.00036851	down	yes	gi|567196026|ref|XM_006406106.1|	1693	0	Eutrema salsugineum hypothetical protein (EUTSA_v10020023mg) mRNA, complete cds	gi|567196027|ref|XP_006406169.1|	4045	0	hypothetical protein EUTSA_v10020023mg [Eutrema salsugineum]	sp|Q9LUW0|LOX5_ARATH	1538	E:0	RecName: Full=Linoleate 9S-lipoxygenase 5, chloroplastic;^Eukaryota; Viridiplantae; Streptophyta; Embryophyta; Tracheophyta; Spermatophyta; Magnoliophyta; eudicotyledons; core eudicotyledons; rosids; malvids; Brassicales; Brassicaceae; Camelineae; Arabidopsis	sp|Q9LUW0|LOX5_ARATH	1454	E:0	RecName: Full=Linoleate 9S-lipoxygenase 5, chloroplastic;^Eukaryota; Viridiplantae; Streptophyta; Embryophyta; Tracheophyta; Spermatophyta; Magnoliophyta; eudicotyledons; core eudicotyledons; rosids; malvids; Brassicales; Brassicaceae; Camelineae; Arabidopsis	PF01477.18	PLAT	PLAT/LH2 domain	NOG69653	Plant lipoxygenase may be involved in a number of diverse aspects of plant physiology including growth and development, pest resistance, and senescence or responses to	.	c48378_g1|m.28052	59-2356[-]	.	.	GO:0010311|lateral root formation;GO:0034440|lipid oxidation;GO:1900366|negative regulation of defense response to insect;GO:0031408|oxylipin biosynthetic process	GO:0005506|iron ion binding;GO:0016165|lipoxygenase activity	GO:0009507|chloroplast	K15718|LOX1_5; linoleate 9S-lipoxygenase [EC:1.13.11.58]	map00591|Linoleic acid metabolism
c48933_g1	0.231396	-2.11156	0.00519232	0.0460099	down	yes	gi|323709159|gb|HQ215235.1|	520	0	Parrya nudicaulis clone 8 flavonol synthase (FLS) mRNA, partial cds	gi|567171866|ref|XP_006399370.1|	1188	5e-163	hypothetical protein EUTSA_v10014054mg [Eutrema salsugineum]	sp|Q96330|FLS1_ARATH	458	E:3e-163	RecName: Full=Flavonol synthase/flavanone 3-hydroxylase;^Eukaryota; Viridiplantae; Streptophyta; Embryophyta; Tracheophyta; Spermatophyta; Magnoliophyta; eudicotyledons; core eudicotyledons; rosids; malvids; Brassicales; Brassicaceae; Camelineae; Arabidopsis`sp|Q96330|FLS1_ARATH	sp|Q96330|FLS1_ARATH	458	E:1e-161	RecName: Full=Flavonol synthase/flavanone 3-hydroxylase;^Eukaryota; Viridiplantae; Streptophyta; Embryophyta; Tracheophyta; Spermatophyta; Magnoliophyta; eudicotyledons; core eudicotyledons; rosids; malvids; Brassicales; Brassicaceae; Camelineae; Arabidopsis	PF14226.1	DIOX_N	non-haem dioxygenase in morphine synthesis N-terminal	COG3491	Isopenicillin N synthase and related dioxygenases	.	c48933_g1|m.28095	559-1290[-]	.	.	GO:0009733|response to auxin stimulus;GO:0080167|response to karrikin	GO:0045431|flavonol synthase activity;GO:0031418|L-ascorbic acid binding;GO:0046872|metal ion binding;GO:0045486|naringenin 3-dioxygenase activity;GO:0016702|oxidoreductase activity, acting on single donors with incorporation of molecular oxygen, incorporation of two atoms of oxygen	GO:0005737|cytoplasm;GO:0005634|nucleus	K05278|FLS; flavonol synthase [EC:1.14.11.23]	map01100|Metabolic pathways;map00941|Flavonoid biosynthesis;map01110|Biosynthesis of secondary metabolites
c42413_g1	0.460649	-1.11826	0.000425984	0.00914571	down	yes	gi|332002898|gb|CP002688.1|	265	3e-135	Arabidopsis thaliana chromosome 5 sequence	gi|567139982|ref|XP_006394939.1|	589	1e-71	hypothetical protein EUTSA_v10005162mg [Eutrema salsugineum]	sp|B6EPU1|RL18_ALISL	67.8	E:3e-12	RecName: Full=50S ribosomal protein L18;^Bacteria; Proteobacteria; Gammaproteobacteria; Vibrionales; Vibrionaceae; Aliivibrio	sp|B6EPU1|RL18_ALISL	67.8	E:5e-14	RecName: Full=50S ribosomal protein L18;^Bacteria; Proteobacteria; Gammaproteobacteria; Vibrionales; Vibrionaceae; Aliivibrio	PF00861.17	Ribosomal_L18p	Ribosomal L18p/L5e family	COG0256	Ribosomal protein L18	.	c42413_g1|m.28118	982-1326[+]	.	.	GO:0006412|translation	GO:0019843|rRNA binding;GO:0003735|structural constituent of ribosome	GO:0005840|ribosome	K02881|RP-L18, MRPL18, rplR; large subunit ribosomal protein L18	map03010|Ribosome
c47163_g2	2.96756	1.56928	3.99802e-06	0.000346908	up	yes	gi|297848029|ref|XM_002891850.1|	542	0	Arabidopsis lyrata subsp. lyrata hypothetical protein, mRNA	gi|685266380|ref|XP_009119401.1|	1299	3e-167	PREDICTED: exosome component 10 isoform X3 [Brassica rapa]	sp|Q01780|EXOSX_HUMAN	222	E:7e-60	RecName: Full=Exosome component 10;^Eukaryota; Metazoa; Chordata; Craniata; Vertebrata; Euteleostomi; Mammalia; Eutheria; Euarchontoglires; Primates; Haplorrhini; Catarrhini; Hominidae; Homo	sp|Q01780|EXOSX_HUMAN	223	E:2e-64	RecName: Full=Exosome component 10;^Eukaryota; Metazoa; Chordata; Craniata; Vertebrata; Euteleostomi; Mammalia; Eutheria; Euarchontoglires; Primates; Haplorrhini; Catarrhini; Hominidae; Homo	PF01612.15	DNA_pol_A_exo1	3'-5' exonuclease	COG0349	Ribonuclease D	.	c47163_g2|m.28324	730-1677[+]	.	.	GO:0071034|CUT catabolic process;GO:0009048|dosage compensation by inactivation of X chromosome;GO:0071044|histone mRNA catabolic process;GO:0000460|maturation of 5.8S rRNA;GO:0071035|nuclear polyadenylation-dependent rRNA catabolic process;GO:0071048|nuclear retention of unspliced pre-mRNA at the site of transcription;GO:0000184|nuclear-transcribed mRNA catabolic process, nonsense-mediated decay	GO:0008408|3'-5' exonuclease activity;GO:0004532|exoribonuclease activity;GO:0000166|nucleotide binding;GO:0003723|RNA binding	GO:0005737|cytoplasm;GO:0000178|exosome (RNase complex);GO:0000176|nuclear exosome (RNase complex);GO:0005730|nucleolus;GO:0035327|transcriptionally active chromatin	K12591|RRP6, EXOSC10; exosome complex exonuclease RRP6 [EC:3.1.13.-]	map03018|RNA degradation
c39461_g1	12.5906	3.65428	0.000317139	0.00751726	up	yes	gi|297809374|ref|XM_002872525.1|	628	0	Arabidopsis lyrata subsp. lyrata peroxidase ATP19a, mRNA	gi|727566325|ref|XP_010455535.1|	1503	0	PREDICTED: peroxidase 39-like [Camelina sativa]	sp|Q9SUT2|PER39_ARATH	582	E:0	RecName: Full=Peroxidase 39;^Eukaryota; Viridiplantae; Streptophyta; Embryophyta; Tracheophyta; Spermatophyta; Magnoliophyta; eudicotyledons; core eudicotyledons; rosids; malvids; Brassicales; Brassicaceae; Camelineae; Arabidopsis	sp|Q9SUT2|PER39_ARATH	605	E:0	RecName: Full=Peroxidase 39;^Eukaryota; Viridiplantae; Streptophyta; Embryophyta; Tracheophyta; Spermatophyta; Magnoliophyta; eudicotyledons; core eudicotyledons; rosids; malvids; Brassicales; Brassicaceae; Camelineae; Arabidopsis	PF00141.18	peroxidase	Peroxidase	.	.	.	c39461_g1|m.28570	219-1199[-]	sigP:1^23^0.629^YES	ExpAA=19.39^PredHel=1^Topology=i2-21o	GO:0042744|hydrogen peroxide catabolic process	GO:0020037|heme binding;GO:0046872|metal ion binding;GO:0004601|peroxidase activity	GO:0005576|extracellular region	K00430|E1.11.1.7; peroxidase [EC:1.11.1.7]	map01100|Metabolic pathways;map00940|Phenylpropanoid biosynthesis;map01110|Biosynthesis of secondary metabolites
c50268_g1	2.06035	1.04289	0.00389798	0.0378826	up	yes	gi|145357777|ref|NM_120909.3|	913	0	Arabidopsis thaliana serine carboxypeptidase-like 35 mRNA, complete cds	gi|727640267|ref|XP_010491452.1|	2106	0	PREDICTED: serine carboxypeptidase-like 35 [Camelina sativa]	sp|Q9LEY1|SCP35_ARATH	810	E:0	RecName: Full=Serine carboxypeptidase-like 35;^Eukaryota; Viridiplantae; Streptophyta; Embryophyta; Tracheophyta; Spermatophyta; Magnoliophyta; eudicotyledons; core eudicotyledons; rosids; malvids; Brassicales; Brassicaceae; Camelineae; Arabidopsis	sp|Q9LEY1|SCP35_ARATH	863	E:0	RecName: Full=Serine carboxypeptidase-like 35;^Eukaryota; Viridiplantae; Streptophyta; Embryophyta; Tracheophyta; Spermatophyta; Magnoliophyta; eudicotyledons; core eudicotyledons; rosids; malvids; Brassicales; Brassicaceae; Camelineae; Arabidopsis	PF00450.17	Peptidase_S10	Serine carboxypeptidase	COG2939	Carboxypeptidase C (cathepsin A)	.	c50268_g1|m.29026	278-1720[-]	sigP:1^20^0.906^YES	.	GO:0006508|proteolysis	GO:0004185|serine-type carboxypeptidase activity	GO:0005576|extracellular region	K16297|SCPL-II; serine carboxypeptidase-like clade II [EC:3.4.16.-]	.
c52893_g2	2.04554	1.03248	0.00282843	0.0308568	up	yes	gi|334188198|ref|NM_123848.3|	2687	0	Arabidopsis thaliana chromatin remodeling 4 protein mRNA, complete cds	gi|297791319|ref|XP_002863544.1|	5488	0	hypothetical protein ARALYDRAFT_917093 [Arabidopsis lyrata subsp. lyrata]	sp|Q9S775|PKL_ARATH	548	E:3e-166	RecName: Full=CHD3-type chromatin-remodeling factor PICKLE;^Eukaryota; Viridiplantae; Streptophyta; Embryophyta; Tracheophyta; Spermatophyta; Magnoliophyta; eudicotyledons; core eudicotyledons; rosids; malvids; Brassicales; Brassicaceae; Camelineae; Arabidopsis	sp|Q9S775|PKL_ARATH	573	E:5e-178	RecName: Full=CHD3-type chromatin-remodeling factor PICKLE;^Eukaryota; Viridiplantae; Streptophyta; Embryophyta; Tracheophyta; Spermatophyta; Magnoliophyta; eudicotyledons; core eudicotyledons; rosids; malvids; Brassicales; Brassicaceae; Camelineae; Arabidopsis	PF00628.24	PHD	PHD-finger	COG0553	Superfamily II DNA/RNA helicases, SNF2 family	.	c52893_g2|m.29114	810-4931[+]	.	.	GO:0008283|cell proliferation;GO:0016568|chromatin modification;GO:0009736|cytokinin mediated signaling pathway;GO:0009788|negative regulation of abscisic acid mediated signaling pathway;GO:0045892|negative regulation of transcription, DNA-dependent;GO:2000023|regulation of lateral root development;GO:0009733|response to auxin stimulus;GO:0009739|response to gibberellin stimulus;GO:0048364|root d…	GO:0005524|ATP binding;GO:0003677|DNA binding;GO:0004386|helicase activity;GO:0046872|metal ion binding;GO:0008270|zinc ion binding	GO:0005634|nucleus	K11643|CHD4, MI2B; chromodomain-helicase-DNA-binding protein 4 [EC:3.6.4.12]	map05203|Viral carcinogenesis
c43360_g1	0.376592	-1.40893	0.000307457	0.00738139	down	yes	gi|565478711|ref|XM_006296934.1|	1023	0	Capsella rubella hypothetical protein (CARUB_v10012990mg) mRNA, complete cds	gi|565478712|ref|XP_006296996.1|	2616	0	hypothetical protein CARUB_v10012990mg [Capsella rubella]	sp|Q9FL28|FLS2_ARATH	209	E:3e-54	RecName: Full=LRR receptor-like serine/threonine-protein kinase FLS2;^Eukaryota; Viridiplantae; Streptophyta; Embryophyta; Tracheophyta; Spermatophyta; Magnoliophyta; eudicotyledons; core eudicotyledons; rosids; malvids; Brassicales; Brassicaceae; Camelineae; Arabidopsis`sp|Q9FL28|FLS2_ARATH	sp|Q8VZG8|Y4885_ARATH	231	E:3e-64	RecName: Full=Probable LRR receptor-like serine/threonine-protein kinase At4g08850;^Eukaryota; Viridiplantae; Streptophyta; Embryophyta; Tracheophyta; Spermatophyta; Magnoliophyta; eudicotyledons; core eudicotyledons; rosids; malvids; Brassicales; Brassicaceae; Camelineae; Arabidopsis`sp|Q8VZG8|Y4885_ARATH	PF00560.28	LRR_1	Leucine Rich Repeat	COG0515	Serine/threonine protein kinase	.	c43360_g1|m.29155	889-2589[+]	.	ExpAA=22.70^PredHel=1^Topology=o527-549i	.	GO:0005524|ATP binding;GO:0004674|protein serine/threonine kinase activity;GO:0004713|protein tyrosine kinase activity	GO:0016021|integral to membrane;GO:0005886|plasma membrane;GO:0009506|plasmodesma	K13420|FLS2; LRR receptor-like serine/threonine-protein kinase FLS2 [EC:2.7.11.1]	map04626|Plant-pathogen interaction
c43360_g1	0.376592	-1.40893	0.000307457	0.00738139	down	yes	gi|565478711|ref|XM_006296934.1|	1023	0	Capsella rubella hypothetical protein (CARUB_v10012990mg) mRNA, complete cds	gi|565478712|ref|XP_006296996.1|	2616	0	hypothetical protein CARUB_v10012990mg [Capsella rubella]	sp|Q9FL28|FLS2_ARATH	209	E:3e-54	RecName: Full=LRR receptor-like serine/threonine-protein kinase FLS2;^Eukaryota; Viridiplantae; Streptophyta; Embryophyta; Tracheophyta; Spermatophyta; Magnoliophyta; eudicotyledons; core eudicotyledons; rosids; malvids; Brassicales; Brassicaceae; Camelineae; Arabidopsis`sp|Q9FL28|FLS2_ARATH	sp|C0LGT6|EFR_ARATH	84.7	E:3e-17	RecName: Full=LRR receptor-like serine/threonine-protein kinase EFR;^Eukaryota; Viridiplantae; Streptophyta; Embryophyta; Tracheophyta; Spermatophyta; Magnoliophyta; eudicotyledons; core eudicotyledons; rosids; malvids; Brassicales; Brassicaceae; Camelineae; Arabidopsis`sp|C0LGT6|EFR_ARATH	PF08263.7	LRRNT_2	Leucine rich repeat N-terminal domain	COG0515	Serine/threonine protein kinase	.	c43360_g1|m.29156	49-687[+]	sigP:1^26^0.81^YES	ExpAA=20.06^PredHel=1^Topology=i7-26o	GO:0010204|defense response signaling pathway, resistance gene-independent;GO:0016045|detection of bacterium;GO:0002764|immune response-regulating signaling pathway;GO:0009626|plant-type hypersensitive response;GO:0010359|regulation of anion channel activity	GO:0005524|ATP binding;GO:0004674|protein serine/threonine kinase activity;GO:0019199|transmembrane receptor protein kinase activity	GO:0016021|integral to membrane	K13420|FLS2; LRR receptor-like serine/threonine-protein kinase FLS2 [EC:2.7.11.1]	map04626|Plant-pathogen interaction
c43344_g1	32.0198	5.00089	0.000911773	0.0148285	up	yes	gi|565385025|ref|XM_006358359.1|	109	6e-49	PREDICTED: Solanum tuberosum 60S ribosomal protein L23-like (LOC102598879), mRNA	gi|546324472|ref|XP_005718380.1|	591	6e-75	unnamed protein product [Chondrus crispus]	sp|P49690|RL23_ARATH	223	E:1e-72	RecName: Full=60S ribosomal protein L23;^Eukaryota; Viridiplantae; Streptophyta; Embryophyta; Tracheophyta; Spermatophyta; Magnoliophyta; eudicotyledons; core eudicotyledons; rosids; malvids; Brassicales; Brassicaceae; Camelineae; Arabidopsis	sp|P49690|RL23_ARATH	235	E:2e-78	RecName: Full=60S ribosomal protein L23;^Eukaryota; Viridiplantae; Streptophyta; Embryophyta; Tracheophyta; Spermatophyta; Magnoliophyta; eudicotyledons; core eudicotyledons; rosids; malvids; Brassicales; Brassicaceae; Camelineae; Arabidopsis	PF00238.14	Ribosomal_L14	Ribosomal protein L14p/L23e	COG0093	Ribosomal protein L14	.	c43344_g1|m.30070	3-443[+]	.	.	GO:0006412|translation	GO:0003735|structural constituent of ribosome	GO:0022625|cytosolic large ribosomal subunit;GO:0005730|nucleolus	K02894|RP-L23e, RPL23; large subunit ribosomal protein L23e	map03010|Ribosome
c50946_g4	2.09567	1.06741	0.0013293	0.0188405	up	yes	gi|334187768|ref|NM_001203409.1|	2004	0	Arabidopsis thaliana regulator of chromosome condensation-like protein with FYVE zinc finger domain mRNA, complete cds	gi|186524238|ref|NP_197443.3|	3740	0	regulator of chromosome condensation-like protein with FYVE zinc finger domain [Arabidopsis thaliana]	sp|O95714|HERC2_HUMAN	186	E:7e-46	RecName: Full=E3 ubiquitin-protein ligase HERC2;^Eukaryota; Metazoa; Chordata; Craniata; Vertebrata; Euteleostomi; Mammalia; Eutheria; Euarchontoglires; Primates; Haplorrhini; Catarrhini; Hominidae; Homo`sp|O95714|HERC2_HUMAN	sp|O95714|HERC2_HUMAN	201	E:8e-52	RecName: Full=E3 ubiquitin-protein ligase HERC2;^Eukaryota; Metazoa; Chordata; Craniata; Vertebrata; Euteleostomi; Mammalia; Eutheria; Euarchontoglires; Primates; Haplorrhini; Catarrhini; Hominidae; Homo`sp|O95714|HERC2_HUMAN	PF00415.13	RCC1	Regulator of chromosome condensation (RCC1) repeat	COG5021	Ubiquitin-protein ligase	.	c50946_g4|m.30590	1462-3654[+]	.	.	GO:0006281|DNA repair;GO:0006886|intracellular protein transport;GO:0042787|protein ubiquitination involved in ubiquitin-dependent protein catabolic process;GO:0007283|spermatogenesis	GO:0005085|guanyl-nucleotide exchange factor activity;GO:0020037|heme binding;GO:0046872|metal ion binding;GO:0032183|SUMO binding;GO:0004842|ubiquitin-protein ligase activity;GO:0008270|zinc ion binding	GO:0005814|centriole;GO:0005737|cytoplasm;GO:0005743|mitochondrial inner membrane;GO:0005634|nucleus	K10595|HERC2; E3 ubiquitin-protein ligase HERC2 [EC:2.3.2.26]	map04120|Ubiquitin mediated proteolysis
c52746_g2	2.32986	1.22024	0.000699799	0.0125106	up	yes	gi|567170012|ref|XM_006398768.1|	1040	0	Eutrema salsugineum hypothetical protein (EUTSA_v10012708mg) mRNA, complete cds	gi|567170013|ref|XP_006398831.1|	1771	0	hypothetical protein EUTSA_v10012708mg [Eutrema salsugineum]	sp|Q05609|CTR1_ARATH	667	E:0	RecName: Full=Serine/threonine-protein kinase CTR1;^Eukaryota; Viridiplantae; Streptophyta; Embryophyta; Tracheophyta; Spermatophyta; Magnoliophyta; eudicotyledons; core eudicotyledons; rosids; malvids; Brassicales; Brassicaceae; Camelineae; Arabidopsis`sp|Q05609|CTR1_ARATH	sp|Q05609|CTR1_ARATH	750	E:0	RecName: Full=Serine/threonine-protein kinase CTR1;^Eukaryota; Viridiplantae; Streptophyta; Embryophyta; Tracheophyta; Spermatophyta; Magnoliophyta; eudicotyledons; core eudicotyledons; rosids; malvids; Brassicales; Brassicaceae; Camelineae; Arabidopsis	PF14381.1	EDR1	Ethylene-responsive protein kinase Le-CTR1	COG0515	Serine/threonine protein kinase	.	c52746_g2|m.30938	757-2262[-]	.	.	GO:0071281|cellular response to iron ion;GO:0009873|ethylene mediated signaling pathway;GO:0009686|gibberellin biosynthetic process;GO:0010105|negative regulation of ethylene mediated signaling pathway;GO:0046777|protein autophosphorylation;GO:2000069|regulation of post-embryonic root development;GO:2000035|regulation of stem cell division;GO:0048510|regulation of timing of transition from vegeta…	GO:0005524|ATP binding;GO:0004674|protein serine/threonine kinase activity;GO:0004712|protein serine/threonine/tyrosine kinase activity	GO:0005789|endoplasmic reticulum membrane	K14510|CTR1; serine/threonine-protein kinase CTR1 [EC:2.7.11.1]	map04075|Plant hormone signal transduction
c52746_g2	2.32986	1.22024	0.000699799	0.0125106	up	yes	gi|567170012|ref|XM_006398768.1|	1040	0	Eutrema salsugineum hypothetical protein (EUTSA_v10012708mg) mRNA, complete cds	gi|567170013|ref|XP_006398831.1|	1771	0	hypothetical protein EUTSA_v10012708mg [Eutrema salsugineum]	sp|Q05609|CTR1_ARATH	667	E:0	RecName: Full=Serine/threonine-protein kinase CTR1;^Eukaryota; Viridiplantae; Streptophyta; Embryophyta; Tracheophyta; Spermatophyta; Magnoliophyta; eudicotyledons; core eudicotyledons; rosids; malvids; Brassicales; Brassicaceae; Camelineae; Arabidopsis`sp|Q05609|CTR1_ARATH	sp|Q05609|CTR1_ARATH	242	E:2e-74	RecName: Full=Serine/threonine-protein kinase CTR1;^Eukaryota; Viridiplantae; Streptophyta; Embryophyta; Tracheophyta; Spermatophyta; Magnoliophyta; eudicotyledons; core eudicotyledons; rosids; malvids; Brassicales; Brassicaceae; Camelineae; Arabidopsis	PF07714.12	Pkinase_Tyr	Protein tyrosine kinase	COG0515	Serine/threonine protein kinase	.	c52746_g2|m.30939	89-472[-]	.	.	GO:0071281|cellular response to iron ion;GO:0009873|ethylene mediated signaling pathway;GO:0009686|gibberellin biosynthetic process;GO:0010105|negative regulation of ethylene mediated signaling pathway;GO:0046777|protein autophosphorylation;GO:2000069|regulation of post-embryonic root development;GO:2000035|regulation of stem cell division;GO:0048510|regulation of timing of transition from vegeta…	GO:0005524|ATP binding;GO:0004674|protein serine/threonine kinase activity;GO:0004712|protein serine/threonine/tyrosine kinase activity	GO:0005789|endoplasmic reticulum membrane	K14510|CTR1; serine/threonine-protein kinase CTR1 [EC:2.7.11.1]	map04075|Plant hormone signal transduction
c48363_g3	5.25714	2.39428	7.20098e-06	0.000541592	up	yes	gi|567136567|ref|XM_006393928.1|	1482	0	Eutrema salsugineum hypothetical protein (EUTSA_v10003576mg) mRNA, complete cds	gi|567136568|ref|XP_006393990.1|	3286	0	hypothetical protein EUTSA_v10003576mg [Eutrema salsugineum]	sp|Q54JE4|ODO1_DICDI	643	E:0	RecName: Full=2-oxoglutarate dehydrogenase, mitochondrial;^Eukaryota; Amoebozoa; Mycetozoa; Dictyosteliida; Dictyostelium	sp|Q54JE4|ODO1_DICDI	644	E:0	RecName: Full=2-oxoglutarate dehydrogenase, mitochondrial;^Eukaryota; Amoebozoa; Mycetozoa; Dictyosteliida; Dictyostelium	PF00676.15	E1_dh	Dehydrogenase E1 component	COG0567	2-oxoglutarate dehydrogenase complex, dehydrogenase (E1) component, and related enzymes	.	c48363_g3|m.32004	146-2038[+]	.	.	GO:0006096|glycolysis;GO:0006099|tricarboxylic acid cycle	GO:0004591|oxoglutarate dehydrogenase (succinyl-transferring) activity;GO:0030976|thiamine pyrophosphate binding	GO:0009353|mitochondrial oxoglutarate dehydrogenase complex	K00164|OGDH, sucA; 2-oxoglutarate dehydrogenase E1 component [EC:1.2.4.2]	map01200|Carbon metabolism;map00020|Citrate cycle (TCA cycle);map00310|Lysine degradation;map01110|Biosynthesis of secondary metabolites;map01100|Metabolic pathways;map00380|Tryptophan metabolism;map01120|Microbial metabolism in diverse environments;map01130|Biosynthesis of antibiotics
c36359_g1	15.0598	3.91263	0.00547691	0.0476978	up	yes	gi|567194791|ref|XM_006405791.1|	514	0	Eutrema salsugineum hypothetical protein (EUTSA_v10027817mg) mRNA, complete cds	gi|228454|prf||1804333B	604	2e-122	Gln synthetase	sp|Q56WN1|GLN11_ARATH	234	E:4e-122	RecName: Full=Glutamine synthetase cytosolic isozyme 1-1;^Eukaryota; Viridiplantae; Streptophyta; Embryophyta; Tracheophyta; Spermatophyta; Magnoliophyta; eudicotyledons; core eudicotyledons; rosids; malvids; Brassicales; Brassicaceae; Camelineae; Arabidopsis`sp|Q56WN1|GLN11_ARATH	sp|Q56WN1|GLN11_ARATH	233	E:3e-75	RecName: Full=Glutamine synthetase cytosolic isozyme 1-1;^Eukaryota; Viridiplantae; Streptophyta; Embryophyta; Tracheophyta; Spermatophyta; Magnoliophyta; eudicotyledons; core eudicotyledons; rosids; malvids; Brassicales; Brassicaceae; Camelineae; Arabidopsis	PF00120.19	Gln-synt_C	Glutamine synthetase, catalytic domain	COG0174	Glutamine synthetase	.	c36359_g1|m.33084	305-673[-]	.	.	GO:0006542|glutamine biosynthetic process;GO:0010150|leaf senescence;GO:0042128|nitrate assimilation;GO:0009399|nitrogen fixation	GO:0005524|ATP binding;GO:0005507|copper ion binding;GO:0004356|glutamate-ammonia ligase activity	GO:0005618|cell wall;GO:0022626|cytosolic ribosome;GO:0005886|plasma membrane;GO:0009506|plasmodesma	K01915|glnA, GLUL; glutamine synthetase [EC:6.3.1.2]	map00630|Glyoxylate and dicarboxylate metabolism;map00220|Arginine biosynthesis;map01230|Biosynthesis of amino acids;map00250|Alanine, aspartate and glutamate metabolism;map04724|Glutamatergic synapse;map04727|GABAergic synapse;map02020|Two-component system;map01100|Metabolic pathways;map01120|Microbial metabolism in diverse environments;map00910|Nitrogen metabolism
c36359_g1	15.0598	3.91263	0.00547691	0.0476978	up	yes	gi|567194791|ref|XM_006405791.1|	514	0	Eutrema salsugineum hypothetical protein (EUTSA_v10027817mg) mRNA, complete cds	gi|228454|prf||1804333B	604	2e-122	Gln synthetase	sp|Q56WN1|GLN11_ARATH	234	E:4e-122	RecName: Full=Glutamine synthetase cytosolic isozyme 1-1;^Eukaryota; Viridiplantae; Streptophyta; Embryophyta; Tracheophyta; Spermatophyta; Magnoliophyta; eudicotyledons; core eudicotyledons; rosids; malvids; Brassicales; Brassicaceae; Camelineae; Arabidopsis`sp|Q56WN1|GLN11_ARATH	sp|Q56WN1|GLN11_ARATH	226	E:1e-71	RecName: Full=Glutamine synthetase cytosolic isozyme 1-1;^Eukaryota; Viridiplantae; Streptophyta; Embryophyta; Tracheophyta; Spermatophyta; Magnoliophyta; eudicotyledons; core eudicotyledons; rosids; malvids; Brassicales; Brassicaceae; Camelineae; Arabidopsis	PF00120.19	Gln-synt_C	Glutamine synthetase, catalytic domain	COG0174	Glutamine synthetase	.	c36359_g1|m.33083	1-564[-]	.	.	GO:0006542|glutamine biosynthetic process;GO:0010150|leaf senescence;GO:0042128|nitrate assimilation;GO:0009399|nitrogen fixation	GO:0005524|ATP binding;GO:0005507|copper ion binding;GO:0004356|glutamate-ammonia ligase activity	GO:0005618|cell wall;GO:0022626|cytosolic ribosome;GO:0005886|plasma membrane;GO:0009506|plasmodesma	K01915|glnA, GLUL; glutamine synthetase [EC:6.3.1.2]	map00630|Glyoxylate and dicarboxylate metabolism;map00220|Arginine biosynthesis;map01230|Biosynthesis of amino acids;map00250|Alanine, aspartate and glutamate metabolism;map04724|Glutamatergic synapse;map04727|GABAergic synapse;map02020|Two-component system;map01100|Metabolic pathways;map01120|Microbial metabolism in diverse environments;map00910|Nitrogen metabolism
c49812_g1	3.11273	1.63818	3.95599e-07	6.35418e-05	up	yes	gi|567192864|ref|XM_006405238.1|	438	0	Eutrema salsugineum hypothetical protein (EUTSA_v10027765mg) mRNA, complete cds	gi|674919926|emb|CDY13383.1|	1043	3e-137	BnaC06g13740D [Brassica napus]	sp|A7PZL3|PGLR_VITVI	215	E:6e-64	RecName: Full=Probable polygalacturonase;^Eukaryota; Viridiplantae; Streptophyta; Embryophyta; Tracheophyta; Spermatophyta; Magnoliophyta; eudicotyledons; core eudicotyledons; rosids; Vitales; Vitaceae; Vitis	sp|A7PZL3|PGLR_VITVI	215	E:6e-65	RecName: Full=Probable polygalacturonase;^Eukaryota; Viridiplantae; Streptophyta; Embryophyta; Tracheophyta; Spermatophyta; Magnoliophyta; eudicotyledons; core eudicotyledons; rosids; Vitales; Vitaceae; Vitis	PF12708.2	Pectate_lyase_3	Pectate lyase superfamily protein	COG5434	Endopolygalacturonase	.	c49812_g1|m.33264	2-730[-]	sigP:1^27^0.797^YES	ExpAA=19.14^PredHel=1^Topology=i7-26o	GO:0005975|carbohydrate metabolic process	GO:0004650|polygalacturonase activity	GO:0016021|integral to membrane	.	.
c37151_g1	6.66934	2.73754	0.000492186	0.0100134	up	yes	gi|567198109|ref|XM_006406693.1|	1067	0	Eutrema salsugineum hypothetical protein (EUTSA_v10020640mg) mRNA, complete cds	gi|15228988|ref|NP_188343.1|	2155	0	protein serine carboxypeptidase-like 33 [Arabidopsis thaliana]	sp|Q9LSM9|SCP33_ARATH	834	E:0	RecName: Full=Serine carboxypeptidase-like 33;^Eukaryota; Viridiplantae; Streptophyta; Embryophyta; Tracheophyta; Spermatophyta; Magnoliophyta; eudicotyledons; core eudicotyledons; rosids; malvids; Brassicales; Brassicaceae; Camelineae; Arabidopsis	sp|Q9LSM9|SCP33_ARATH	860	E:0	RecName: Full=Serine carboxypeptidase-like 33;^Eukaryota; Viridiplantae; Streptophyta; Embryophyta; Tracheophyta; Spermatophyta; Magnoliophyta; eudicotyledons; core eudicotyledons; rosids; malvids; Brassicales; Brassicaceae; Camelineae; Arabidopsis	PF00450.17	Peptidase_S10	Serine carboxypeptidase	COG2939	Carboxypeptidase C (cathepsin A)	.	c37151_g1|m.33662	210-1640[-]	sigP:1^25^0.574^YES	.	GO:0006508|proteolysis	GO:0004185|serine-type carboxypeptidase activity	GO:0005576|extracellular region	K16297|SCPL-II; serine carboxypeptidase-like clade II [EC:3.4.16.-]	.
c47790_g2	0.350223	-1.51366	0.00407452	0.0391094	down	yes	gi|567198816|ref|XM_006406895.1|	641	0	Eutrema salsugineum hypothetical protein (EUTSA_v10021257mg) mRNA, complete cds	gi|567198817|ref|XP_006406958.1|	1150	1e-153	hypothetical protein EUTSA_v10021257mg [Eutrema salsugineum]	sp|B2IUM7|UBIE_NOSP7	52	E:3e-06	RecName: Full=Demethylmenaquinone methyltransferase;^Bacteria; Cyanobacteria; Nostocales; Nostocaceae; Nostoc	sp|Q74LY0|UBIE_LACJO	59.7	E:3e-09	RecName: Full=Demethylmenaquinone methyltransferase;^Bacteria; Firmicutes; Bacilli; Lactobacillales; Lactobacillaceae; Lactobacillus	PF01209.13	Ubie_methyltran	ubiE/COQ5 methyltransferase family	COG2226	Methylase involved in ubiquinone/menaquinone biosynthesis	.	c47790_g2|m.34582	481-1314[-]	.	ExpAA=46.33^PredHel=2^Topology=i13-35o55-77i	GO:0009234|menaquinone biosynthetic process	GO:0008168|methyltransferase activity	.	K03183|ubiE; demethylmenaquinone methyltransferase / 2-methoxy-6-polyprenyl-1,4-benzoquinol methylase [EC:2.1.1.163 2.1.1.201]	map00130|Ubiquinone and other terpenoid-quinone biosynthesis;map01100|Metabolic pathways;map01110|Biosynthesis of secondary metabolites
c49156_g1	4.41311	2.1418	0.00141327	0.0196667	up	yes	gi|567138091|ref|XM_006394339.1|	2778	0	Eutrema salsugineum hypothetical protein (EUTSA_v10003541mg) mRNA, complete cds	gi|674875047|emb|CDY58002.1|	5171	0	BnaC03g74950D [Brassica napus]	sp|Q9C5Y4|SMC21_ARATH	1972	E:0	RecName: Full=Structural maintenance of chromosomes protein 2-1;^Eukaryota; Viridiplantae; Streptophyta; Embryophyta; Tracheophyta; Spermatophyta; Magnoliophyta; eudicotyledons; core eudicotyledons; rosids; malvids; Brassicales; Brassicaceae; Camelineae; Arabidopsis	sp|Q9C5Y4|SMC21_ARATH	2199	E:0	RecName: Full=Structural maintenance of chromosomes protein 2-1;^Eukaryota; Viridiplantae; Streptophyta; Embryophyta; Tracheophyta; Spermatophyta; Magnoliophyta; eudicotyledons; core eudicotyledons; rosids; malvids; Brassicales; Brassicaceae; Camelineae; Arabidopsis	PF02463.14	SMC_N	RecF/RecN/SMC N terminal domain	COG1196	Chromosome segregation ATPases	.	c49156_g1|m.34793	288-3815[+]	.	.	GO:0051301|cell division;GO:0030261|chromosome condensation;GO:0006310|DNA recombination;GO:0006281|DNA repair;GO:0007126|meiosis;GO:0007067|mitosis;GO:0007062|sister chromatid cohesion	GO:0005524|ATP binding;GO:0005215|transporter activity	GO:0000796|condensin complex;GO:0005634|nucleus	K06674|SMC2; structural maintenance of chromosome 2	map04111|Cell cycle - yeast
c42634_g1	6.66692	2.73702	0.00417323	0.0397249	up	yes	gi|567219819|ref|XM_006413476.1|	513	0	Eutrema salsugineum hypothetical protein (EUTSA_v10025293mg) mRNA, complete cds	gi|567219820|ref|XP_006413539.1|	1289	5e-169	hypothetical protein EUTSA_v10025293mg [Eutrema salsugineum]	sp|Q8VYP2|TAT4_ARATH	479	E:5e-162	RecName: Full=Probable aminotransferase TAT4;^Eukaryota; Viridiplantae; Streptophyta; Embryophyta; Tracheophyta; Spermatophyta; Magnoliophyta; eudicotyledons; core eudicotyledons; rosids; malvids; Brassicales; Brassicaceae; Camelineae; Arabidopsis`sp|Q8VYP2|TAT4_ARATH	sp|Q8VYP2|TAT4_ARATH	493	E:6e-173	RecName: Full=Probable aminotransferase TAT4;^Eukaryota; Viridiplantae; Streptophyta; Embryophyta; Tracheophyta; Spermatophyta; Magnoliophyta; eudicotyledons; core eudicotyledons; rosids; malvids; Brassicales; Brassicaceae; Camelineae; Arabidopsis	PF00155.16	Aminotran_1_2	Aminotransferase class I and II	COG0436	Aspartate/tyrosine/aromatic aminotransferase	.	c42634_g1|m.34940	1-954[+]	.	ExpAA=26.81^PredHel=1^Topology=o290-312i	GO:0009058|biosynthetic process;GO:0006520|cellular amino acid metabolic process	GO:0030170|pyridoxal phosphate binding;GO:0008483|transaminase activity	.	K00815|TAT; tyrosine aminotransferase [EC:2.6.1.5]	map01230|Biosynthesis of amino acids;map00950|Isoquinoline alkaloid biosynthesis;map00400|Phenylalanine, tyrosine and tryptophan biosynthesis;map00401|Novobiocin biosynthesis;map00960|Tropane, piperidine and pyridine alkaloid biosynthesis;map00130|Ubiquinone and other terpenoid-quinone biosynthesis;map00270|Cysteine and methionine metabolism;map00360|Phenylalanine metabolism;map01110|Biosynthesis…
c50975_g3	7.86903	2.97619	1.49281e-05	0.00093528	up	yes	gi|391225624|gb|JQ904705.1|	691	0	Noccaea caerulescens ecotype La Calamine heavy metal ATPase 4-2 (HMA4-2) mRNA, complete cds	gi|727417735|ref|XP_010415068.1|	1333	4e-172	PREDICTED: putative cadmium/zinc-transporting ATPase HMA4 [Camelina sativa]	sp|O64474|HMA4_ARATH	502	E:5e-167	RecName: Full=Putative cadmium/zinc-transporting ATPase HMA4;^Eukaryota; Viridiplantae; Streptophyta; Embryophyta; Tracheophyta; Spermatophyta; Magnoliophyta; eudicotyledons; core eudicotyledons; rosids; malvids; Brassicales; Brassicaceae; Camelineae; Arabidopsis`sp|O64474|HMA4_ARATH	sp|O64474|HMA4_ARATH	526	E:7e-177	RecName: Full=Putative cadmium/zinc-transporting ATPase HMA4;^Eukaryota; Viridiplantae; Streptophyta; Embryophyta; Tracheophyta; Spermatophyta; Magnoliophyta; eudicotyledons; core eudicotyledons; rosids; malvids; Brassicales; Brassicaceae; Camelineae; Arabidopsis	PF00122.15	E1-E2_ATPase	E1-E2 ATPase	COG2217	Cation transport ATPase	.	c50975_g3|m.35245	117-944[-]	.	ExpAA=45.11^PredHel=2^Topology=i90-112o127-149i	GO:0006754|ATP biosynthetic process;GO:0046686|response to cadmium ion;GO:0032025|response to cobalt ion;GO:0010043|response to zinc ion;GO:0055069|zinc ion homeostasis	GO:0005524|ATP binding;GO:0015086|cadmium ion transmembrane transporter activity;GO:0008551|cadmium-exporting ATPase activity;GO:0043682|copper-transporting ATPase activity;GO:0046872|metal ion binding;GO:0005385|zinc ion transmembrane transporter activity;GO:0016463|zinc-exporting ATPase activity	GO:0016021|integral to membrane;GO:0005886|plasma membrane;GO:0009506|plasmodesma	K01534|zntA; Cd2+/Zn2+-exporting ATPase [EC:3.6.3.3 3.6.3.5]	.
c45690_g1	2.25964	1.17609	0.00479405	0.0435015	up	yes	gi|567207471|ref|XM_006409246.1|	291	5e-150	Eutrema salsugineum hypothetical protein (EUTSA_v10022728mg) mRNA, complete cds	gi|297832348|ref|XP_002884056.1|	617	3e-75	thioredoxin reductase [Arabidopsis lyrata subsp. lyrata]	sp|Q39242|TRXB2_ARATH	241	E:2e-76	RecName: Full=Thioredoxin reductase 2;^Eukaryota; Viridiplantae; Streptophyta; Embryophyta; Tracheophyta; Spermatophyta; Magnoliophyta; eudicotyledons; core eudicotyledons; rosids; malvids; Brassicales; Brassicaceae; Camelineae; Arabidopsis	sp|Q39242|TRXB2_ARATH	260	E:2e-85	RecName: Full=Thioredoxin reductase 2;^Eukaryota; Viridiplantae; Streptophyta; Embryophyta; Tracheophyta; Spermatophyta; Magnoliophyta; eudicotyledons; core eudicotyledons; rosids; malvids; Brassicales; Brassicaceae; Camelineae; Arabidopsis	PF07992.9	Pyr_redox_2	Pyridine nucleotide-disulphide oxidoreductase	COG0492	Thioredoxin reductase	.	c45690_g1|m.35532	1-393[-]	.	.	GO:0022900|electron transport chain;GO:0019430|removal of superoxide radicals	GO:0050660|flavin adenine dinucleotide binding;GO:0004791|thioredoxin-disulfide reductase activity	GO:0005759|mitochondrial matrix	K00384|trxB; thioredoxin reductase (NADPH) [EC:1.8.1.9]	map00450|Selenocompound metabolism;map00240|Pyrimidine metabolism
c52152_g1	0.3024	-1.72547	0.000176606	0.00516277	down	yes	gi|22087198|gb|AF487814.1|	1666	0	Arabidopsis thaliana ecotype Kas-1 RPS2 (rps2) gene, complete cds	gi|567219208|ref|XP_006413233.1|	3857	0	hypothetical protein EUTSA_v10024353mg [Eutrema salsugineum]	sp|Q42484|RPS2_ARATH	1464	E:0	RecName: Full=Disease resistance protein RPS2;^Eukaryota; Viridiplantae; Streptophyta; Embryophyta; Tracheophyta; Spermatophyta; Magnoliophyta; eudicotyledons; core eudicotyledons; rosids; malvids; Brassicales; Brassicaceae; Camelineae; Arabidopsis	sp|Q42484|RPS2_ARATH	1522	E:0	RecName: Full=Disease resistance protein RPS2;^Eukaryota; Viridiplantae; Streptophyta; Embryophyta; Tracheophyta; Spermatophyta; Magnoliophyta; eudicotyledons; core eudicotyledons; rosids; malvids; Brassicales; Brassicaceae; Camelineae; Arabidopsis	PF00931.17	NB-ARC	NB-ARC domain	COG4886	Leucine-rich repeat (LRR) protein	.	c52152_g1|m.36211	765-3491[-]	.	.	GO:0042742|defense response to bacterium;GO:0016045|detection of bacterium;GO:0009626|plant-type hypersensitive response	GO:0043531|ADP binding;GO:0005524|ATP binding;GO:0017111|nucleoside-triphosphatase activity	GO:0005737|cytoplasm;GO:0005886|plasma membrane	K13459|RPS2; disease resistance protein RPS2	map04626|Plant-pathogen interaction
c52336_g1	20.4299	4.35261	2.83903e-06	0.000272013	up	yes	gi|567167321|ref|XM_006397992.1|	1032	0	Eutrema salsugineum hypothetical protein (EUTSA_v10000845mg) mRNA, complete cds	gi|567167322|ref|XP_006398055.1|	2195	0	hypothetical protein EUTSA_v10000845mg [Eutrema salsugineum]	sp|Q9SVG4|RETOL_ARATH	358	E:5e-114	RecName: Full=Reticuline oxidase-like protein;^Eukaryota; Viridiplantae; Streptophyta; Embryophyta; Tracheophyta; Spermatophyta; Magnoliophyta; eudicotyledons; core eudicotyledons; rosids; malvids; Brassicales; Brassicaceae; Camelineae; Arabidopsis	sp|Q9SVG4|RETOL_ARATH	379	E:8e-123	RecName: Full=Reticuline oxidase-like protein;^Eukaryota; Viridiplantae; Streptophyta; Embryophyta; Tracheophyta; Spermatophyta; Magnoliophyta; eudicotyledons; core eudicotyledons; rosids; malvids; Brassicales; Brassicaceae; Camelineae; Arabidopsis	PF01565.18	FAD_binding_4	FAD binding domain	COG0277	FAD/FMN-containing dehydrogenases	.	c52336_g1|m.37173	128-1753[-]	sigP:1^29^0.823^YES	ExpAA=35.44^PredHel=1^Topology=i7-29o	GO:0006979|response to oxidative stress	GO:0050660|flavin adenine dinucleotide binding;GO:0008762|UDP-N-acetylmuramate dehydrogenase activity	GO:0031225|anchored to membrane;GO:0048046|apoplast;GO:0005829|cytosol;GO:0005739|mitochondrion;GO:0009505|plant-type cell wall;GO:0005886|plasma membrane;GO:0009506|plasmodesma;GO:0005773|vacuole	.	.
c35521_g2	2.96648	1.56875	0.000225453	0.00601652	up	yes	gi|567208337|ref|XM_006409485.1|	324	1e-168	Eutrema salsugineum hypothetical protein (EUTSA_v10022589mg) mRNA, complete cds	gi|674962217|emb|CDX71223.1|	705	5e-87	BnaC07g05020D [Brassica napus]	sp|P42731|PABP2_ARATH	259	E:4e-82	RecName: Full=Polyadenylate-binding protein 2;^Eukaryota; Viridiplantae; Streptophyta; Embryophyta; Tracheophyta; Spermatophyta; Magnoliophyta; eudicotyledons; core eudicotyledons; rosids; malvids; Brassicales; Brassicaceae; Camelineae; Arabidopsis`sp|P42731|PABP2_ARATH	sp|P42731|PABP2_ARATH	259	E:4e-82	RecName: Full=Polyadenylate-binding protein 2;^Eukaryota; Viridiplantae; Streptophyta; Embryophyta; Tracheophyta; Spermatophyta; Magnoliophyta; eudicotyledons; core eudicotyledons; rosids; malvids; Brassicales; Brassicaceae; Camelineae; Arabidopsis`sp|P42731|PABP2_ARATH	PF00076.17	RRM_1	RNA recognition motif. (a.k.a. RRM, RBD, or RNP domain)	COG0724	RNA-binding proteins (RRM domain)	.	c35521_g2|m.37197	1-420[+]	.	.	GO:0009651|response to salt stress	GO:0000166|nucleotide binding;GO:0003743|translation initiation factor activity	GO:0005829|cytosol	K13126|PABPC; polyadenylate-binding protein	map03015|mRNA surveillance pathway;map03013|RNA transport;map03018|RNA degradation
c45500_g1	8.09653	3.0173	0.00264637	0.0295834	up	yes	gi|567175040|ref|XM_006400250.1|	1086	0	Eutrema salsugineum hypothetical protein (EUTSA_v10013347mg) mRNA, complete cds	gi|567175038|ref|XP_006400312.1|	2266	0	hypothetical protein EUTSA_v10013347mg [Eutrema salsugineum]	sp|Q9LYT3|TT12_ARATH	273	E:3e-80	RecName: Full=Protein TRANSPARENT TESTA 12;^Eukaryota; Viridiplantae; Streptophyta; Embryophyta; Tracheophyta; Spermatophyta; Magnoliophyta; eudicotyledons; core eudicotyledons; rosids; malvids; Brassicales; Brassicaceae; Camelineae; Arabidopsis	sp|Q9LYT3|TT12_ARATH	296	E:5e-92	RecName: Full=Protein TRANSPARENT TESTA 12;^Eukaryota; Viridiplantae; Streptophyta; Embryophyta; Tracheophyta; Spermatophyta; Magnoliophyta; eudicotyledons; core eudicotyledons; rosids; malvids; Brassicales; Brassicaceae; Camelineae; Arabidopsis	PF01554.13	MatE	MatE	COG0534	Na+-driven multidrug efflux pump	.	c45500_g1|m.38507	441-1928[-]	.	ExpAA=259.82^PredHel=12^Topology=i43-62o82-104i117-139o154-176i183-205o215-237i257-279o294-316i337-359o379-401i408-430o440-457i	GO:0009813|flavonoid biosynthetic process;GO:0010231|maintenance of seed dormancy;GO:0010023|proanthocyanidin biosynthetic process	GO:0015238|drug transmembrane transporter activity;GO:0015299|solute:hydrogen antiporter activity	GO:0016021|integral to membrane;GO:0009705|plant-type vacuole membrane	K03327|TC.MATE, SLC47A, norM, mdtK, dinF; multidrug resistance protein, MATE family	.
c45589_g2	6.32275	2.66055	4.82169e-06	0.000400181	up	yes	gi|567219159|ref|XM_006413146.1|	588	0	Eutrema salsugineum hypothetical protein (EUTSA_v10025029mg) mRNA, complete cds	gi|567219160|ref|XP_006413209.1|	1211	1e-160	hypothetical protein EUTSA_v10025029mg [Eutrema salsugineum]	sp|Q94AA4|K6PF3_ARATH	469	E:2e-161	RecName: Full=6-phosphofructokinase 3;^Eukaryota; Viridiplantae; Streptophyta; Embryophyta; Tracheophyta; Spermatophyta; Magnoliophyta; eudicotyledons; core eudicotyledons; rosids; malvids; Brassicales; Brassicaceae; Camelineae; Arabidopsis	sp|Q94AA4|K6PF3_ARATH	456	E:2e-158	RecName: Full=6-phosphofructokinase 3;^Eukaryota; Viridiplantae; Streptophyta; Embryophyta; Tracheophyta; Spermatophyta; Magnoliophyta; eudicotyledons; core eudicotyledons; rosids; malvids; Brassicales; Brassicaceae; Camelineae; Arabidopsis	PF00365.15	PFK	Phosphofructokinase	COG0205	6-phosphofructokinase	.	c45589_g2|m.38706	363-1079[+]	.	.	GO:0006002|fructose 6-phosphate metabolic process;GO:0006096|glycolysis	GO:0003872|6-phosphofructokinase activity;GO:0005524|ATP binding	GO:0005945|6-phosphofructokinase complex;GO:0005829|cytosol	K00850|pfkA, PFK; 6-phosphofructokinase 1 [EC:2.7.1.11]	map00030|Pentose phosphate pathway;map04152|AMPK signaling pathway;map00052|Galactose metabolism;map00680|Methane metabolism;map01200|Carbon metabolism;map01230|Biosynthesis of amino acids;map00010|Glycolysis / Gluconeogenesis;map05230|Central carbon metabolism in cancer;map01110|Biosynthesis of secondary metabolites;map03018|RNA degradation;map00051|Fructose and mannose metabolism;map01100|Metab…
c38101_g1	0.160155	-2.64246	0.000925445	0.0149366	down	yes	gi|567141459|ref|XM_006395295.1|	868	0	Eutrema salsugineum hypothetical protein (EUTSA_v10003936mg) mRNA, complete cds	gi|567141460|ref|XP_006395357.1|	1890	0	hypothetical protein EUTSA_v10003936mg [Eutrema salsugineum]	sp|Q54DY9|BCS1B_DICDI	112	E:4e-25	RecName: Full=Probable mitochondrial chaperone BCS1-B;^Eukaryota; Amoebozoa; Mycetozoa; Dictyosteliida; Dictyostelium	sp|Q54DY9|BCS1B_DICDI	129	E:3e-31	RecName: Full=Probable mitochondrial chaperone BCS1-B;^Eukaryota; Amoebozoa; Mycetozoa; Dictyosteliida; Dictyostelium	PF14363.1	AAA_assoc	Domain associated at C-terminal with AAA	COG0465	ATP-dependent Zn proteases	.	c38101_g1|m.39467	136-1701[+]	.	ExpAA=17.89^PredHel=1^Topology=i5-24o	GO:0051131|chaperone-mediated protein complex assembly	GO:0005524|ATP binding;GO:0016887|ATPase activity	GO:0016021|integral to membrane;GO:0005743|mitochondrial inner membrane;GO:0005739|mitochondrion	K08900|BCS1; mitochondrial chaperone BCS1	.
c37948_g2	2.88376	1.52795	0.00058369	0.0111497	up	yes	gi|443609448|dbj|AB778564.1|	438	0	Arabidopsis thaliana AT4G32640 mRNA for Sec24-like transport protein, complete cds, ecotype: Columbia	gi|727519961|ref|XP_010436285.1|	888	8e-112	PREDICTED: protein transport protein Sec24-like At4g32640 [Camelina sativa]	sp|Q9M081|SC24B_ARATH	347	E:2e-111	RecName: Full=Protein transport protein Sec24-like At4g32640;^Eukaryota; Viridiplantae; Streptophyta; Embryophyta; Tracheophyta; Spermatophyta; Magnoliophyta; eudicotyledons; core eudicotyledons; rosids; malvids; Brassicales; Brassicaceae; Camelineae; Arabidopsis	sp|Q9M081|SC24B_ARATH	347	E:2e-111	RecName: Full=Protein transport protein Sec24-like At4g32640;^Eukaryota; Viridiplantae; Streptophyta; Embryophyta; Tracheophyta; Spermatophyta; Magnoliophyta; eudicotyledons; core eudicotyledons; rosids; malvids; Brassicales; Brassicaceae; Camelineae; Arabidopsis	PF04811.10	Sec23_trunk	Sec23/Sec24 trunk domain	COG5028	Vesicle coat complex COPII, subunit SEC24/subunit SFB2/subunit SFB3	.	c37948_g2|m.40204	1-519[+]	.	.	GO:0006888|ER to Golgi vesicle-mediated transport;GO:0006886|intracellular protein transport	GO:0008270|zinc ion binding	GO:0030127|COPII vesicle coat;GO:0005789|endoplasmic reticulum membrane;GO:0033116|endoplasmic reticulum-Golgi intermediate compartment membrane;GO:0000139|Golgi membrane	K14007|SEC24; protein transport protein SEC24	map04141|Protein processing in endoplasmic reticulum
c51690_g3	3.1964	1.67645	0.000337246	0.00783239	up	yes	gi|385719276|gb|AC235830.2|	216	2e-108	Glycine max clone GM_WBb0029M14, complete sequence	gi|727457161|ref|XP_010510475.1|	722	2e-90	PREDICTED: tubulin beta-7 chain isoform X1 [Camelina sativa]	sp|P29516|TBB8_ARATH	275	E:8e-89	RecName: Full=Tubulin beta-8 chain;^Eukaryota; Viridiplantae; Streptophyta; Embryophyta; Tracheophyta; Spermatophyta; Magnoliophyta; eudicotyledons; core eudicotyledons; rosids; malvids; Brassicales; Brassicaceae; Camelineae; Arabidopsis	sp|P29516|TBB8_ARATH	276	E:2e-90	RecName: Full=Tubulin beta-8 chain;^Eukaryota; Viridiplantae; Streptophyta; Embryophyta; Tracheophyta; Spermatophyta; Magnoliophyta; eudicotyledons; core eudicotyledons; rosids; malvids; Brassicales; Brassicaceae; Camelineae; Arabidopsis	PF10644.4	Misat_Tub_SegII	Misato Segment II tubulin-like domain	COG5023	Tubulin	.	c51690_g3|m.40529	2-406[+]	.	.	GO:0007018|microtubule-based movement;GO:0007017|microtubule-based process;GO:0051258|protein polymerization;GO:0009651|response to salt stress	GO:0005525|GTP binding;GO:0003924|GTPase activity;GO:0005200|structural constituent of cytoskeleton	GO:0005794|Golgi apparatus;GO:0016020|membrane;GO:0005874|microtubule;GO:0045298|tubulin complex	K07375|TUBB; tubulin beta	map05130|Pathogenic Escherichia coli infection;map04145|Phagosome;map04540|Gap junction
c47176_g2	28.1975	4.81749	5.66253e-08	1.60927e-05	up	yes	gi|297832101|ref|XM_002883887.1|	944	0	Arabidopsis lyrata subsp. lyrata hypothetical protein, mRNA	gi|297832102|ref|XP_002883933.1|	2043	0	hypothetical protein ARALYDRAFT_319536 [Arabidopsis lyrata subsp. lyrata]	sp|P08799|MYS2_DICDI	392	E:1e-120	RecName: Full=Myosin-2 heavy chain;^Eukaryota; Amoebozoa; Mycetozoa; Dictyosteliida; Dictyostelium	sp|P08799|MYS2_DICDI	392	E:1e-120	RecName: Full=Myosin-2 heavy chain;^Eukaryota; Amoebozoa; Mycetozoa; Dictyosteliida; Dictyostelium	PF00063.16	Myosin_head	Myosin head (motor domain)	COG5022	Myosin heavy chain	.	c47176_g2|m.40608	2-1252[+]	.	.	GO:0033275|actin-myosin filament sliding;GO:0032060|bleb assembly;GO:0006935|chemotaxis;GO:0030038|contractile actin filament bundle assembly;GO:0030866|cortical actin cytoskeleton organization;GO:0031154|culmination involved in sorocarp development;GO:0000910|cytokinesis;GO:0060328|cytoplasmic actin-based contraction involved in forward cell motility;GO:0046847|filopodium assembly;GO:0031034|myo…	GO:0051015|actin filament binding;GO:0030898|actin-dependent ATPase activity;GO:0005524|ATP binding;GO:0000146|microfilament motor activity;GO:0042803|protein homodimerization activity	GO:0042641|actomyosin;GO:0005826|actomyosin contractile ring;GO:0045179|apical cortex;GO:0032009|early phagosome;GO:0032982|myosin filament;GO:0016460|myosin II complex;GO:0001931|uropod	K10352|MYH; myosin heavy chain	map04530|Tight junction
c45037_g1	33.809	5.07934	5.94665e-06	0.0004717	up	yes	gi|567196254|ref|XM_006406173.1|	678	0	Eutrema salsugineum hypothetical protein (EUTSA_v10021123mg) mRNA, complete cds	gi|565480984|ref|XP_006298132.1|	1643	0	hypothetical protein CARUB_v10014176mg [Capsella rubella]	sp|Q9LSY7|PER30_ARATH	609	E:0	RecName: Full=Peroxidase 30;^Eukaryota; Viridiplantae; Streptophyta; Embryophyta; Tracheophyta; Spermatophyta; Magnoliophyta; eudicotyledons; core eudicotyledons; rosids; malvids; Brassicales; Brassicaceae; Camelineae; Arabidopsis	sp|Q9LSY7|PER30_ARATH	609	E:0	RecName: Full=Peroxidase 30;^Eukaryota; Viridiplantae; Streptophyta; Embryophyta; Tracheophyta; Spermatophyta; Magnoliophyta; eudicotyledons; core eudicotyledons; rosids; malvids; Brassicales; Brassicaceae; Camelineae; Arabidopsis	PF00141.18	peroxidase	Peroxidase	.	.	.	c45037_g1|m.40898	159-1148[-]	sigP:1^27^0.692^YES	ExpAA=19.34^PredHel=1^Topology=i7-24o	GO:0042744|hydrogen peroxide catabolic process	GO:0020037|heme binding;GO:0046872|metal ion binding;GO:0004601|peroxidase activity	GO:0005737|cytoplasm;GO:0005576|extracellular region;GO:0005634|nucleus;GO:0009505|plant-type cell wall;GO:0009506|plasmodesma	K00430|E1.11.1.7; peroxidase [EC:1.11.1.7]	map01100|Metabolic pathways;map00940|Phenylpropanoid biosynthesis;map01110|Biosynthesis of secondary metabolites
c52441_g1	0.4827	-1.0508	0.00140241	0.019555	down	yes	gi|297806438|ref|XM_002871057.1|	353	0	Arabidopsis lyrata subsp. lyrata hypothetical protein, mRNA	gi|110739587|dbj|BAF01702.1|	783	2e-99	sulphite reductase [Arabidopsis thaliana]	sp|Q9LZ66|SIR_ARATH	308	E:4e-98	RecName: Full=Sulfite reductase [ferredoxin], chloroplastic;^Eukaryota; Viridiplantae; Streptophyta; Embryophyta; Tracheophyta; Spermatophyta; Magnoliophyta; eudicotyledons; core eudicotyledons; rosids; malvids; Brassicales; Brassicaceae; Camelineae; Arabidopsis	sp|Q9LZ66|SIR_ARATH	308	E:3e-100	RecName: Full=Sulfite reductase [ferredoxin], chloroplastic;^Eukaryota; Viridiplantae; Streptophyta; Embryophyta; Tracheophyta; Spermatophyta; Magnoliophyta; eudicotyledons; core eudicotyledons; rosids; malvids; Brassicales; Brassicaceae; Camelineae; Arabidopsis	PF01077.17	NIR_SIR	Nitrite and sulphite reductase 4Fe-4S domain	COG0155	Sulfite reductase, beta subunit (hemoprotein)	.	c52441_g1|m.41149	381-890[-]	.	.	GO:0006323|DNA packaging;GO:0045892|negative regulation of transcription, DNA-dependent;GO:0006275|regulation of DNA replication;GO:0009409|response to cold;GO:0009651|response to salt stress;GO:0019424|sulfide oxidation, using siroheme sulfite reductase	GO:0051539|4 iron, 4 sulfur cluster binding;GO:0005507|copper ion binding;GO:0003677|DNA binding;GO:0020037|heme binding;GO:0050311|sulfite reductase (ferredoxin) activity;GO:0016002|sulfite reductase activity	GO:0048046|apoplast;GO:0009941|chloroplast envelope;GO:0042644|chloroplast nucleoid;GO:0016020|membrane;GO:0010319|stromule	K00392|sir; sulfite reductase (ferredoxin) [EC:1.8.7.1]	map01100|Metabolic pathways;map00920|Sulfur metabolism;map01120|Microbial metabolism in diverse environments
c51870_g2	8.26535	3.04708	3.34057e-05	0.00165629	up	yes	gi|289629357|gb|AC240098.1|	457	0	Sisymbrium irio clone SIR-19O02, complete sequence	gi|567197429|ref|XP_006406567.1|	721	5e-88	hypothetical protein EUTSA_v10021951mg [Eutrema salsugineum]	sp|Q9LS99|ATL77_ARATH	266	E:2e-83	RecName: Full=RING-H2 finger protein ATL77;^Eukaryota; Viridiplantae; Streptophyta; Embryophyta; Tracheophyta; Spermatophyta; Magnoliophyta; eudicotyledons; core eudicotyledons; rosids; malvids; Brassicales; Brassicaceae; Camelineae; Arabidopsis	sp|Q9LS99|ATL77_ARATH	341	E:1e-117	RecName: Full=RING-H2 finger protein ATL77;^Eukaryota; Viridiplantae; Streptophyta; Embryophyta; Tracheophyta; Spermatophyta; Magnoliophyta; eudicotyledons; core eudicotyledons; rosids; malvids; Brassicales; Brassicaceae; Camelineae; Arabidopsis	PF12678.2	zf-rbx1	RING-H2 zinc finger	COG5540	RING-finger-containing ubiquitin ligase	.	c51870_g2|m.41157	911-1582[-]	.	ExpAA=22.47^PredHel=1^Topology=o52-74i	GO:0016567|protein ubiquitination	GO:0046872|metal ion binding;GO:0008270|zinc ion binding	GO:0016021|integral to membrane	K19040|ATL76S; E3 ubiquitin-protein ligase ATL10/75/76/77/78 [EC:2.3.2.27]	.
c48919_g2	2.25059	1.17031	0.00476458	0.0433053	up	yes	gi|145336047|ref|NM_102167.3|	612	0	Arabidopsis thaliana phosphoglucomutase 3 mRNA, complete cds	gi|685348830|ref|XP_009110113.1|	1308	7e-174	PREDICTED: probable phosphoglucomutase, cytoplasmic 1 [Brassica rapa]	sp|O49299|PGMC1_ARATH	507	E:8e-175	RecName: Full=Probable phosphoglucomutase, cytoplasmic 1;^Eukaryota; Viridiplantae; Streptophyta; Embryophyta; Tracheophyta; Spermatophyta; Magnoliophyta; eudicotyledons; core eudicotyledons; rosids; malvids; Brassicales; Brassicaceae; Camelineae; Arabidopsis	sp|O49299|PGMC1_ARATH	463	E:3e-160	RecName: Full=Probable phosphoglucomutase, cytoplasmic 1;^Eukaryota; Viridiplantae; Streptophyta; Embryophyta; Tracheophyta; Spermatophyta; Magnoliophyta; eudicotyledons; core eudicotyledons; rosids; malvids; Brassicales; Brassicaceae; Camelineae; Arabidopsis	PF02878.11	PGM_PMM_I	Phosphoglucomutase/phosphomannomutase, alpha/beta/alpha domain I	COG0033	Phosphoglucomutase	.	c48919_g2|m.41383	383-1090[+]	.	.	GO:0006874|cellular calcium ion homeostasis;GO:0009590|detection of gravity;GO:0019388|galactose catabolic process;GO:0048229|gametophyte development;GO:0019255|glucose 1-phosphate metabolic process;GO:0006006|glucose metabolic process;GO:0046686|response to cadmium ion;GO:0019252|starch biosynthetic process;GO:0005992|trehalose biosynthetic process	GO:0000287|magnesium ion binding;GO:0004614|phosphoglucomutase activity	GO:0009570|chloroplast stroma;GO:0044445|cytosolic part;GO:0005634|nucleus;GO:0005886|plasma membrane;GO:0010319|stromule	K01835|pgm; phosphoglucomutase [EC:5.4.2.2]	map00030|Pentose phosphate pathway;map00500|Starch and sucrose metabolism;map00010|Glycolysis / Gluconeogenesis;map00521|Streptomycin biosynthesis;map00520|Amino sugar and nucleotide sugar metabolism;map01110|Biosynthesis of secondary metabolites;map01100|Metabolic pathways;map00230|Purine metabolism;map01120|Microbial metabolism in diverse environments;map00052|Galactose metabolism;map01130|Bios…
c34239_g1	2.99277	1.58148	0.00118713	0.0175528	up	yes	gi|567124646|ref|XM_006391175.1|	398	0	Eutrema salsugineum hypothetical protein (EUTSA_v10018246mg) mRNA, complete cds	gi|674937421|emb|CDX96073.1|	876	2e-108	BnaA07g26580D [Brassica napus]	sp|Q54EP7|SRP72_DICDI	96.3	E:7e-25	RecName: Full=Signal recognition particle 72 kDa protein homolog;^Eukaryota; Amoebozoa; Mycetozoa; Dictyosteliida; Dictyostelium`sp|Q54EP7|SRP72_DICDI	sp|Q54EP7|SRP72_DICDI	96.3	E:2e-21	RecName: Full=Signal recognition particle 72 kDa protein homolog;^Eukaryota; Amoebozoa; Mycetozoa; Dictyosteliida; Dictyostelium	PF13371.1	TPR_9	Tetratricopeptide repeat	NOG263236	Pentatricopeptide repeat domain 3	.	c34239_g1|m.41727	75-710[+]	.	.	GO:0006614|SRP-dependent cotranslational protein targeting to membrane	GO:0008312|7S RNA binding	GO:0005786|signal recognition particle, endoplasmic reticulum targeting	K03108|SRP72; signal recognition particle subunit SRP72	map03060|Protein export
c46053_g2	10.257	3.35853	0.000312222	0.00746461	up	yes	gi|567213449|ref|XM_006410820.1|	265	7e-136	Eutrema salsugineum hypothetical protein (EUTSA_v10016314mg) mRNA, complete cds	gi|166715360|gb|ABY88392.1|	649	2e-84	phenylalanine ammonia-lyase, partial [Arabidopsis thaliana]	sp|P35510|PAL1_ARATH	258	E:3e-81	RecName: Full=Phenylalanine ammonia-lyase 1;^Eukaryota; Viridiplantae; Streptophyta; Embryophyta; Tracheophyta; Spermatophyta; Magnoliophyta; eudicotyledons; core eudicotyledons; rosids; malvids; Brassicales; Brassicaceae; Camelineae; Arabidopsis	sp|P35510|PAL1_ARATH	258	E:3e-81	RecName: Full=Phenylalanine ammonia-lyase 1;^Eukaryota; Viridiplantae; Streptophyta; Embryophyta; Tracheophyta; Spermatophyta; Magnoliophyta; eudicotyledons; core eudicotyledons; rosids; malvids; Brassicales; Brassicaceae; Camelineae; Arabidopsis	PF00221.14	Lyase_aromatic	Aromatic amino acid lyase	COG2986	Histidine ammonia-lyase	.	c46053_g2|m.42139	2-364[+]	.	.	GO:0009800|cinnamic acid biosynthetic process;GO:0009819|drought recovery;GO:0006559|L-phenylalanine catabolic process;GO:0046274|lignin catabolic process;GO:0009555|pollen development;GO:0080167|response to karrikin;GO:0006979|response to oxidative stress;GO:0010224|response to UV-B;GO:0046244|salicylic acid catabolic process	GO:0045548|phenylalanine ammonia-lyase activity	GO:0005737|cytoplasm	K10775|E4.3.1.24; phenylalanine ammonia-lyase [EC:4.3.1.24]	map01110|Biosynthesis of secondary metabolites;map01100|Metabolic pathways;map00940|Phenylpropanoid biosynthesis;map00360|Phenylalanine metabolism
c51400_g3	0.0868814	-3.52481	2.57978e-34	7.11168e-30	down	yes	gi|567172182|ref|XM_006399390.1|	469	0	Eutrema salsugineum hypothetical protein (EUTSA_v10014674mg) mRNA, complete cds	gi|565434843|ref|XP_006281092.1|	820	1e-105	hypothetical protein CARUB_v10027122mg [Capsella rubella]	sp|Q7L1T6|NB5R4_HUMAN	125	E:2e-30	RecName: Full=Cytochrome b5 reductase 4;^Eukaryota; Metazoa; Chordata; Craniata; Vertebrata; Euteleostomi; Mammalia; Eutheria; Euarchontoglires; Primates; Haplorrhini; Catarrhini; Hominidae; Homo	sp|Q7L1T6|NB5R4_HUMAN	126	E:2e-32	RecName: Full=Cytochrome b5 reductase 4;^Eukaryota; Metazoa; Chordata; Craniata; Vertebrata; Euteleostomi; Mammalia; Eutheria; Euarchontoglires; Primates; Haplorrhini; Catarrhini; Hominidae; Homo	PF00173.23	Cyt-b5	Cytochrome b5-like Heme/Steroid binding domain	COG0543	2-polyprenylphenol hydroxylase and related flavodoxin oxidoreductases	.	c51400_g3|m.42281	371-991[+]	.	.	GO:0048468|cell development;GO:0003032|detection of oxygen;GO:0006091|generation of precursor metabolites and energy;GO:0042593|glucose homeostasis;GO:0030073|insulin secretion;GO:0046677|response to antibiotic;GO:0006801|superoxide metabolic process	GO:0004128|cytochrome-b5 reductase activity, acting on NAD(P)H;GO:0020037|heme binding;GO:0046872|metal ion binding;GO:0016174|NAD(P)H oxidase activity	GO:0005783|endoplasmic reticulum;GO:0048471|perinuclear region of cytoplasm	K00326|E1.6.2.2; cytochrome-b5 reductase [EC:1.6.2.2]	map00520|Amino sugar and nucleotide sugar metabolism
c47635_g1	11.003	3.45982	0.000977933	0.015503	up	yes	gi|567152875|ref|XM_006417265.1|	453	0	Eutrema salsugineum hypothetical protein (EUTSA_v10007409mg) mRNA, complete cds	gi|674869962|emb|CDY64933.1|	1081	8e-137	BnaCnng45550D [Brassica napus]	sp|Q9LYT3|TT12_ARATH	217	E:1e-60	RecName: Full=Protein TRANSPARENT TESTA 12;^Eukaryota; Viridiplantae; Streptophyta; Embryophyta; Tracheophyta; Spermatophyta; Magnoliophyta; eudicotyledons; core eudicotyledons; rosids; malvids; Brassicales; Brassicaceae; Camelineae; Arabidopsis`sp|Q9LYT3|TT12_ARATH	sp|Q9LYT3|TT12_ARATH	156	E:4e-44	RecName: Full=Protein TRANSPARENT TESTA 12;^Eukaryota; Viridiplantae; Streptophyta; Embryophyta; Tracheophyta; Spermatophyta; Magnoliophyta; eudicotyledons; core eudicotyledons; rosids; malvids; Brassicales; Brassicaceae; Camelineae; Arabidopsis	PF01554.13	MatE	MatE	COG0534	Na+-driven multidrug efflux pump	.	c47635_g1|m.42543	2-466[-]	.	ExpAA=86.09^PredHel=4^Topology=i31-53o68-90i97-119o129-148i	GO:0009813|flavonoid biosynthetic process;GO:0010231|maintenance of seed dormancy;GO:0010023|proanthocyanidin biosynthetic process	GO:0015238|drug transmembrane transporter activity;GO:0015299|solute:hydrogen antiporter activity	GO:0016021|integral to membrane;GO:0009705|plant-type vacuole membrane	K03327|TC.MATE, SLC47A, norM, mdtK, dinF; multidrug resistance protein, MATE family	.
c47635_g1	11.003	3.45982	0.000977933	0.015503	up	yes	gi|567152875|ref|XM_006417265.1|	453	0	Eutrema salsugineum hypothetical protein (EUTSA_v10007409mg) mRNA, complete cds	gi|674869962|emb|CDY64933.1|	1081	8e-137	BnaCnng45550D [Brassica napus]	sp|Q9LYT3|TT12_ARATH	217	E:1e-60	RecName: Full=Protein TRANSPARENT TESTA 12;^Eukaryota; Viridiplantae; Streptophyta; Embryophyta; Tracheophyta; Spermatophyta; Magnoliophyta; eudicotyledons; core eudicotyledons; rosids; malvids; Brassicales; Brassicaceae; Camelineae; Arabidopsis`sp|Q9LYT3|TT12_ARATH	sp|Q9LYT3|TT12_ARATH	215	E:5e-65	RecName: Full=Protein TRANSPARENT TESTA 12;^Eukaryota; Viridiplantae; Streptophyta; Embryophyta; Tracheophyta; Spermatophyta; Magnoliophyta; eudicotyledons; core eudicotyledons; rosids; malvids; Brassicales; Brassicaceae; Camelineae; Arabidopsis	PF01554.13	MatE	MatE	COG0534	Na+-driven multidrug efflux pump	.	c47635_g1|m.42542	1323-1997[-]	sigP:1^19^0.612^YES	ExpAA=112.22^PredHel=5^Topology=o5-24i37-59o74-96i109-131o136-158i	GO:0009813|flavonoid biosynthetic process;GO:0010231|maintenance of seed dormancy;GO:0010023|proanthocyanidin biosynthetic process	GO:0015238|drug transmembrane transporter activity;GO:0015299|solute:hydrogen antiporter activity	GO:0016021|integral to membrane;GO:0009705|plant-type vacuole membrane	K03327|TC.MATE, SLC47A, norM, mdtK, dinF; multidrug resistance protein, MATE family	.
c48445_g1	31.279	4.96712	0.000837353	0.0140718	up	yes	gi|121698000|ref|XM_001267681.1|	32	5e-06	Aspergillus clavatus NRRL 1 60S ribosomal protein L18, partial mRNA	gi|168016845|ref|XP_001760959.1|	689	3e-88	predicted protein [Physcomitrella patens]	sp|Q940B0|RL183_ARATH	249	E:3e-81	RecName: Full=60S ribosomal protein L18-3;^Eukaryota; Viridiplantae; Streptophyta; Embryophyta; Tracheophyta; Spermatophyta; Magnoliophyta; eudicotyledons; core eudicotyledons; rosids; malvids; Brassicales; Brassicaceae; Camelineae; Arabidopsis	sp|Q940B0|RL183_ARATH	249	E:2e-82	RecName: Full=60S ribosomal protein L18-3;^Eukaryota; Viridiplantae; Streptophyta; Embryophyta; Tracheophyta; Spermatophyta; Magnoliophyta; eudicotyledons; core eudicotyledons; rosids; malvids; Brassicales; Brassicaceae; Camelineae; Arabidopsis	PF00828.14	Ribosomal_L18e	Ribosomal protein L18e/L15	COG1727	Ribosomal protein L18E	.	c48445_g1|m.43150	213-791[-]	.	.	GO:0006412|translation	GO:0003735|structural constituent of ribosome	GO:0022625|cytosolic large ribosomal subunit;GO:0016020|membrane;GO:0009506|plasmodesma;GO:0005773|vacuole	K02883|RP-L18e, RPL18; large subunit ribosomal protein L18e	map03010|Ribosome
c35654_g1	68.1484	6.09061	3.84315e-08	1.22325e-05	up	yes	gi|567210652|ref|XM_006410080.1|	1156	0	Eutrema salsugineum hypothetical protein (EUTSA_v10016445mg) mRNA, complete cds	gi|685300659|ref|XP_009141050.1|	2919	0	PREDICTED: laccase-3 [Brassica rapa]	sp|Q56YT0|LAC3_ARATH	1105	E:0	RecName: Full=Laccase-3;^Eukaryota; Viridiplantae; Streptophyta; Embryophyta; Tracheophyta; Spermatophyta; Magnoliophyta; eudicotyledons; core eudicotyledons; rosids; malvids; Brassicales; Brassicaceae; Camelineae; Arabidopsis	sp|Q56YT0|LAC3_ARATH	1118	E:0	RecName: Full=Laccase-3;^Eukaryota; Viridiplantae; Streptophyta; Embryophyta; Tracheophyta; Spermatophyta; Magnoliophyta; eudicotyledons; core eudicotyledons; rosids; malvids; Brassicales; Brassicaceae; Camelineae; Arabidopsis	PF07732.10	Cu-oxidase_3	Multicopper oxidase	COG2132	Putative multicopper oxidases	.	c35654_g1|m.43863	3-1748[+]	.	ExpAA=20.31^PredHel=1^Topology=i20-39o	GO:0046274|lignin catabolic process	GO:0005507|copper ion binding;GO:0052716|hydroquinone:oxygen oxidoreductase activity	GO:0048046|apoplast	K05909|E1.10.3.2; laccase [EC:1.10.3.2]	.
c44278_g2	0.369667	-1.4357	4.77675e-06	0.000399033	down	yes	gi|297830529|ref|XM_002883101.1|	230	6e-116	Arabidopsis lyrata subsp. lyrata 60S ribosomal protein L30, mRNA	gi|297830530|ref|XP_002883147.1|	540	1e-65	60S ribosomal protein L30 [Arabidopsis lyrata subsp. lyrata]	sp|Q9C8F7|RL301_ARATH	208	E:3e-65	RecName: Full=Putative 60S ribosomal protein L30-1;^Eukaryota; Viridiplantae; Streptophyta; Embryophyta; Tracheophyta; Spermatophyta; Magnoliophyta; eudicotyledons; core eudicotyledons; rosids; malvids; Brassicales; Brassicaceae; Camelineae; Arabidopsis	sp|Q9C8F7|RL301_ARATH	223	E:2e-74	RecName: Full=Putative 60S ribosomal protein L30-1;^Eukaryota; Viridiplantae; Streptophyta; Embryophyta; Tracheophyta; Spermatophyta; Magnoliophyta; eudicotyledons; core eudicotyledons; rosids; malvids; Brassicales; Brassicaceae; Camelineae; Arabidopsis	PF01248.21	Ribosomal_L7Ae	Ribosomal protein L7Ae/L30e/S12e/Gadd45 family	COG1911	Ribosomal protein L30E	.	c44278_g2|m.43875	602-1018[-]	.	.	GO:0006412|translation	GO:0003735|structural constituent of ribosome	GO:0022625|cytosolic large ribosomal subunit	K02908|RP-L30e, RPL30; large subunit ribosomal protein L30e	map03010|Ribosome
c51286_g2	3.35231	1.74515	0.00553345	0.0479839	up	yes	gi|297799549|ref|XM_002867613.1|	669	0	Arabidopsis lyrata subsp. lyrata ubiquitin-specific protease 16 (UBP16), mRNA	gi|297799550|ref|XP_002867659.1|	791	6e-92	ubiquitin-specific protease 16 [Arabidopsis lyrata subsp. lyrata]	sp|Q9SB51|UBP16_ARATH	295	E:6e-88	RecName: Full=Ubiquitin carboxyl-terminal hydrolase 16;^Eukaryota; Viridiplantae; Streptophyta; Embryophyta; Tracheophyta; Spermatophyta; Magnoliophyta; eudicotyledons; core eudicotyledons; rosids; malvids; Brassicales; Brassicaceae; Camelineae; Arabidopsis	sp|Q9SB51|UBP16_ARATH	356	E:8e-113	RecName: Full=Ubiquitin carboxyl-terminal hydrolase 16;^Eukaryota; Viridiplantae; Streptophyta; Embryophyta; Tracheophyta; Spermatophyta; Magnoliophyta; eudicotyledons; core eudicotyledons; rosids; malvids; Brassicales; Brassicaceae; Camelineae; Arabidopsis	PF01753.13	zf-MYND	MYND finger	COG5533	Ubiquitin C-terminal hydrolase	.	c51286_g2|m.44009	418-1359[+]	.	ExpAA=22.19^PredHel=1^Topology=o5-27i	GO:0008283|cell proliferation;GO:0009908|flower development;GO:0048366|leaf development;GO:0048364|root development;GO:0006511|ubiquitin-dependent protein catabolic process	GO:0008234|cysteine-type peptidase activity;GO:0046872|metal ion binding;GO:0004221|ubiquitin thiolesterase activity;GO:0008270|zinc ion binding	GO:0016021|integral to membrane	K11855|USP36_42; ubiquitin carboxyl-terminal hydrolase 36/42 [EC:3.4.19.12]	.
c39389_g2	20.6915	4.37097	4.08363e-07	6.50713e-05	up	yes	gi|567189025|ref|XM_006404209.1|	738	0	Eutrema salsugineum hypothetical protein (EUTSA_v10010474mg) mRNA, complete cds	gi|567189026|ref|XP_006404272.1|	1532	0	hypothetical protein EUTSA_v10010474mg [Eutrema salsugineum]	sp|Q9STL5|CEP3_ARATH	576	E:0	RecName: Full=KDEL-tailed cysteine endopeptidase CEP3;^Eukaryota; Viridiplantae; Streptophyta; Embryophyta; Tracheophyta; Spermatophyta; Magnoliophyta; eudicotyledons; core eudicotyledons; rosids; malvids; Brassicales; Brassicaceae; Camelineae; Arabidopsis	sp|Q9STL5|CEP3_ARATH	651	E:0	RecName: Full=KDEL-tailed cysteine endopeptidase CEP3;^Eukaryota; Viridiplantae; Streptophyta; Embryophyta; Tracheophyta; Spermatophyta; Magnoliophyta; eudicotyledons; core eudicotyledons; rosids; malvids; Brassicales; Brassicaceae; Camelineae; Arabidopsis	PF08246.7	Inhibitor_I29	Cathepsin propeptide inhibitor domain (I29)	COG4870	Cysteine protease	.	c39389_g2|m.44121	43-1149[+]	sigP:1^19^0.88^YES	.	GO:0006508|proteolysis	GO:0008234|cysteine-type peptidase activity	GO:0005783|endoplasmic reticulum	K16292|CEP, CYSEP; KDEL-tailed cysteine endopeptidase [EC:3.4.22.-]	.
c37755_g1	38.1811	5.25479	1.37989e-05	0.000888768	up	yes	gi|567152929|ref|XM_006417280.1|	283	2e-145	Eutrema salsugineum hypothetical protein (EUTSA_v10007263mg) mRNA, complete cds	gi|674250669|gb|KFK43434.1|	654	3e-76	hypothetical protein AALP_AA1G125000 [Arabis alpina]	sp|Q1JPL7|PME18_ARATH	248	E:3e-74	RecName: Full=Pectinesterase/pectinesterase inhibitor 18;^Eukaryota; Viridiplantae; Streptophyta; Embryophyta; Tracheophyta; Spermatophyta; Magnoliophyta; eudicotyledons; core eudicotyledons; rosids; malvids; Brassicales; Brassicaceae; Camelineae; Arabidopsis	sp|Q1JPL7|PME18_ARATH	248	E:1e-78	RecName: Full=Pectinesterase/pectinesterase inhibitor 18;^Eukaryota; Viridiplantae; Streptophyta; Embryophyta; Tracheophyta; Spermatophyta; Magnoliophyta; eudicotyledons; core eudicotyledons; rosids; malvids; Brassicales; Brassicaceae; Camelineae; Arabidopsis	PF01095.14	Pectinesterase	Pectinesterase	COG4677	Pectin methylesterase	.	c37755_g1|m.45287	869-1240[-]	.	.	GO:0042545|cell wall modification;GO:0050832|defense response to fungus;GO:0031640|killing of cells of other organism;GO:0043086|negative regulation of catalytic activity;GO:0017148|negative regulation of translation;GO:0045490|pectin catabolic process	GO:0045330|aspartyl esterase activity;GO:0004857|enzyme inhibitor activity;GO:0030599|pectinesterase activity;GO:0030598|rRNA N-glycosylase activity	GO:0005618|cell wall;GO:0005829|cytosol;GO:0005576|extracellular region;GO:0005774|vacuolar membrane	K01051|E3.1.1.11; pectinesterase [EC:3.1.1.11]	map01100|Metabolic pathways;map00040|Pentose and glucuronate interconversions;map00500|Starch and sucrose metabolism
c51797_g7	19.1785	4.26141	0.00324025	0.0336057	up	yes	gi|302309926|ref|XM_451025.2|	155	1e-74	Kluyveromyces lactis NRRL Y-1140 ubiquitin-60S ribosomal protein L40 fusion protein, partial mRNA	gi|761968959|gb|KIZ00066.1|	627	3e-81	large subunit ribosomal protein L40e [Monoraphidium neglectum]	sp|P18101|RL40_DROME	246	E:2e-82	RecName: Full=Ubiquitin-60S ribosomal protein L40;^Eukaryota; Metazoa; Ecdysozoa; Arthropoda; Hexapoda; Insecta; Pterygota; Neoptera; Endopterygota; Diptera; Brachycera; Muscomorpha; Ephydroidea; Drosophilidae; Drosophila; Sophophora	sp|P18101|RL40_DROME	246	E:5e-83	RecName: Full=Ubiquitin-60S ribosomal protein L40;^Eukaryota; Metazoa; Ecdysozoa; Arthropoda; Hexapoda; Insecta; Pterygota; Neoptera; Endopterygota; Diptera; Brachycera; Muscomorpha; Ephydroidea; Drosophilidae; Drosophila; Sophophora	PF11976.3	Rad60-SLD	Ubiquitin-2 like Rad60 SUMO-like	COG5272	Ubiquitin	.	c51797_g7|m.46268	98-490[-]	.	.	GO:0006464|cellular protein modification process;GO:0006412|translation;GO:0006511|ubiquitin-dependent protein catabolic process	GO:0003735|structural constituent of ribosome	GO:0022625|cytosolic large ribosomal subunit;GO:0005811|lipid particle;GO:0005875|microtubule associated complex;GO:0005634|nucleus	K02927|RP-L40e, RPL40; large subunit ribosomal protein L40e	map03010|Ribosome
c44218_g1	17.8021	4.15397	0.000174528	0.00511954	up	yes	gi|186478944|ref|NM_102578.3|	1503	0	Arabidopsis thaliana indole-3-acetic acid-amido synthetase GH3.17 mRNA, complete cds	gi|15217844|ref|NP_174134.1|	3113	0	indole-3-acetic acid-amido synthetase GH3.17 [Arabidopsis thaliana]	sp|Q9FZ87|GH317_ARATH	1203	E:0	RecName: Full=Indole-3-acetic acid-amido synthetase GH3.17;^Eukaryota; Viridiplantae; Streptophyta; Embryophyta; Tracheophyta; Spermatophyta; Magnoliophyta; eudicotyledons; core eudicotyledons; rosids; malvids; Brassicales; Brassicaceae; Camelineae; Arabidopsis	sp|Q9FZ87|GH317_ARATH	1204	E:0	RecName: Full=Indole-3-acetic acid-amido synthetase GH3.17;^Eukaryota; Viridiplantae; Streptophyta; Embryophyta; Tracheophyta; Spermatophyta; Magnoliophyta; eudicotyledons; core eudicotyledons; rosids; malvids; Brassicales; Brassicaceae; Camelineae; Arabidopsis	PF03321.8	GH3	GH3 auxin-responsive promoter	NOG86848	Protein involved in response to auxin stimulus	.	c44218_g1|m.47133	254-2083[-]	.	.	GO:0010252|auxin homeostasis;GO:0009733|response to auxin stimulus	GO:0010279|indole-3-acetic acid amido synthetase activity	GO:0005737|cytoplasm;GO:0005634|nucleus;GO:0009536|plastid	K14487|GH3; auxin responsive GH3 gene family	map04075|Plant hormone signal transduction
c47522_g1	3.73104	1.89958	0.00469167	0.0428405	up	yes	gi|297848623|ref|XM_002892147.1|	638	0	Arabidopsis lyrata subsp. lyrata phosphatidylcholine-sterol O-acyltransferase, mRNA	gi|4204287|gb|AAD10668.1|	1312	2e-174	Hypothetical protein [Arabidopsis thaliana]	sp|Q4VCM1|LCAT2_ARATH	509	E:2e-174	RecName: Full=Phospholipid--sterol O-acyltransferase;^Eukaryota; Viridiplantae; Streptophyta; Embryophyta; Tracheophyta; Spermatophyta; Magnoliophyta; eudicotyledons; core eudicotyledons; rosids; malvids; Brassicales; Brassicaceae; Camelineae; Arabidopsis	sp|Q4VCM1|LCAT2_ARATH	509	E:4e-177	RecName: Full=Phospholipid--sterol O-acyltransferase;^Eukaryota; Viridiplantae; Streptophyta; Embryophyta; Tracheophyta; Spermatophyta; Magnoliophyta; eudicotyledons; core eudicotyledons; rosids; malvids; Brassicales; Brassicaceae; Camelineae; Arabidopsis	PF02450.10	LCAT	Lecithin:cholesterol acyltransferase	NOG259861	Notch-Regulated ankyrin repeat protein	.	c47522_g1|m.48847	132-929[+]	sigP:1^26^0.793^YES	ExpAA=18.69^PredHel=1^Topology=i5-27o	GO:0010150|leaf senescence;GO:0016127|sterol catabolic process;GO:0034434|sterol esterification	GO:0080096|phosphatidate-sterol O-acyltransferase activity;GO:0004607|phosphatidylcholine-sterol O-acyltransferase activity;GO:0080095|phosphatidylethanolamine-sterol O-acyltransferase activity	GO:0005783|endoplasmic reticulum;GO:0016021|integral to membrane;GO:0043231|intracellular membrane-bounded organelle;GO:0031090|organelle membrane	.	.
c52084_g2	3.31044	1.72702	0.000768402	0.0132806	up	yes	gi|567203819|ref|XM_006408293.1|	190	1e-93	Eutrema salsugineum hypothetical protein (EUTSA_v10020648mg) mRNA, complete cds	gi|15228440|ref|NP_186949.1|	334	3e-31	heat stress transcription factor A-1e [Arabidopsis thaliana]	sp|Q9SCW5|HFA1E_ARATH	132	E:2e-32	RecName: Full=Heat stress transcription factor A-1e;^Eukaryota; Viridiplantae; Streptophyta; Embryophyta; Tracheophyta; Spermatophyta; Magnoliophyta; eudicotyledons; core eudicotyledons; rosids; malvids; Brassicales; Brassicaceae; Camelineae; Arabidopsis	sp|Q9SCW5|HFA1E_ARATH	148	E:1e-41	RecName: Full=Heat stress transcription factor A-1e;^Eukaryota; Viridiplantae; Streptophyta; Embryophyta; Tracheophyta; Spermatophyta; Magnoliophyta; eudicotyledons; core eudicotyledons; rosids; malvids; Brassicales; Brassicaceae; Camelineae; Arabidopsis	PF00447.12	HSF_DNA-bind	HSF-type DNA-binding	COG5169	Heat shock transcription factor	.	c52084_g2|m.48952	152-532[+]	.	ExpAA=20.36^PredHel=1^Topology=i86-108o	GO:0006950|response to stress;GO:0006351|transcription, DNA-dependent	GO:0043565|sequence-specific DNA binding;GO:0003700|sequence-specific DNA binding transcription factor activity	GO:0005737|cytoplasm;GO:0005634|nucleus	K09419|HSFF; heat shock transcription factor, other eukaryote	.
c45795_g1	0.449578	-1.15336	0.00550288	0.0477939	down	yes	gi|186478061|ref|NM_100122.5|	416	0	Arabidopsis thaliana cytochrome c oxidase assembly protein CtaG / Cox11 mRNA, complete cds	gi|297843040|ref|XP_002889401.1|	771	3e-133	cytochrome c oxidase assembly protein CtaG [Arabidopsis lyrata subsp. lyrata]	sp|Q8GWR0|COX11_ARATH	296	E:1e-132	RecName: Full=Cytochrome c oxidase assembly protein COX11, mitochondrial;^Eukaryota; Viridiplantae; Streptophyta; Embryophyta; Tracheophyta; Spermatophyta; Magnoliophyta; eudicotyledons; core eudicotyledons; rosids; malvids; Brassicales; Brassicaceae; Camelineae; Arabidopsis`sp|Q8GWR0|COX11_ARATH	sp|Q8GWR0|COX11_ARATH	296	E:6e-100	RecName: Full=Cytochrome c oxidase assembly protein COX11, mitochondrial;^Eukaryota; Viridiplantae; Streptophyta; Embryophyta; Tracheophyta; Spermatophyta; Magnoliophyta; eudicotyledons; core eudicotyledons; rosids; malvids; Brassicales; Brassicaceae; Camelineae; Arabidopsis	PF04442.9	CtaG_Cox11	Cytochrome c oxidase assembly protein CtaG/Cox11	COG3175	Cytochrome oxidase assembly factor	.	c45795_g1|m.50477	605-1138[-]	.	ExpAA=21.98^PredHel=1^Topology=i95-117o	.	GO:0005507|copper ion binding	GO:0016021|integral to membrane;GO:0005743|mitochondrial inner membrane	K02258|COX11; cytochrome c oxidase assembly protein subunit 11	map01100|Metabolic pathways;map00190|Oxidative phosphorylation
c46970_g2	22.3836	4.48437	0.00200876	0.0245677	up	yes	gi|618805066|ref|XM_007305231.1|	198	4e-98	Stereum hirsutum FP-91666 SS1 60S ribosomal protein L3 (STEHIDRAFT_80978), mRNA	gi|763727210|gb|KJA24629.1|	1322	3e-180	hypothetical protein HYPSUDRAFT_38707 [Hypholoma sublateritium FD-334 SS-4]	sp|Q8NKF4|RL3_ASPFU	490	E:1e-171	RecName: Full=60S ribosomal protein L3;^Eukaryota; Fungi; Dikarya; Ascomycota; Pezizomycotina; Eurotiomycetes; Eurotiomycetidae; Eurotiales; Trichocomaceae; mitosporic Trichocomaceae; Aspergillus	sp|Q8NKF4|RL3_ASPFU	491	E:4e-172	RecName: Full=60S ribosomal protein L3;^Eukaryota; Fungi; Dikarya; Ascomycota; Pezizomycotina; Eurotiomycetes; Eurotiomycetidae; Eurotiales; Trichocomaceae; mitosporic Trichocomaceae; Aspergillus	PF00297.17	Ribosomal_L3	Ribosomal protein L3	COG0087	Ribosomal protein L3	.	c46970_g2|m.50672	1-1023[+]	.	.	GO:0006412|translation	GO:0003735|structural constituent of ribosome	GO:0005840|ribosome	K02925|RP-L3e, RPL3; large subunit ribosomal protein L3e	map03010|Ribosome
c47530_g2	0.164668	-2.60237	0.00199572	0.0244842	down	yes	gi|567161098|ref|XM_006396303.1|	599	0	Eutrema salsugineum hypothetical protein (EUTSA_v10028870mg) mRNA, complete cds	gi|674926127|emb|CDY07122.1|	1364	0	BnaCnng01370D [Brassica napus]	sp|Q5NB11|CHI10_ORYSJ	361	E:2e-122	RecName: Full=Chitinase 10;^Eukaryota; Viridiplantae; Streptophyta; Embryophyta; Tracheophyta; Spermatophyta; Magnoliophyta; Liliopsida; Poales; Poaceae; BEP clade; Ehrhartoideae; Oryzeae; Oryza	sp|Q5NB11|CHI10_ORYSJ	362	E:1e-123	RecName: Full=Chitinase 10;^Eukaryota; Viridiplantae; Streptophyta; Embryophyta; Tracheophyta; Spermatophyta; Magnoliophyta; Liliopsida; Poales; Poaceae; BEP clade; Ehrhartoideae; Oryzeae; Oryza	PF00182.14	Glyco_hydro_19	Chitinase class I	COG3979	Uncharacterized protein contain chitin-binding domain type 3	.	c47530_g2|m.50722	216-1067[-]	sigP:1^31^0.747^YES	ExpAA=16.09^PredHel=1^Topology=i9-26o	GO:0016998|cell wall macromolecule catabolic process;GO:0006032|chitin catabolic process;GO:0000272|polysaccharide catabolic process	GO:0004568|chitinase activity	GO:0005618|cell wall	.	.
c44767_g1	11.2533	3.49227	0.00205265	0.0249936	up	yes	gi|110738056|dbj|AK229082.1|	1126	0	Arabidopsis thaliana mRNA for putative cytochrome P450, clone: RAFL16-36-L14	gi|685367488|ref|XP_009117728.1|	2545	0	PREDICTED: cytochrome P450 72C1-like [Brassica rapa]	sp|Q9SHG5|C72C1_ARATH	972	E:0	RecName: Full=Cytochrome P450 72C1;^Eukaryota; Viridiplantae; Streptophyta; Embryophyta; Tracheophyta; Spermatophyta; Magnoliophyta; eudicotyledons; core eudicotyledons; rosids; malvids; Brassicales; Brassicaceae; Camelineae; Arabidopsis	sp|Q9SHG5|C72C1_ARATH	1003	E:0	RecName: Full=Cytochrome P450 72C1;^Eukaryota; Viridiplantae; Streptophyta; Embryophyta; Tracheophyta; Spermatophyta; Magnoliophyta; eudicotyledons; core eudicotyledons; rosids; malvids; Brassicales; Brassicaceae; Camelineae; Arabidopsis	PF00067.17	p450	Cytochrome P450	COG2124	Cytochrome P450	.	c44767_g1|m.52222	266-1906[-]	.	ExpAA=23.51^PredHel=1^Topology=i37-59o	GO:0040008|regulation of growth	GO:0009055|electron carrier activity;GO:0020037|heme binding;GO:0005506|iron ion binding;GO:0004497|monooxygenase activity;GO:0016705|oxidoreductase activity, acting on paired donors, with incorporation or reduction of molecular oxygen	GO:0016021|integral to membrane	K15638|CYP72C1, SOB7; cytochrome P450, family 72, subfamily C, polypeptide 1	.
c37197_g1	19.2562	4.26725	0.00362016	0.0362371	up	yes	gi|255965365|gb|FJ599935.1|	47	2e-14	Pfiesteria piscicida clone Ppi+Rhod_cDNA64 60s ribosomal protein l9 mRNA, complete cds	gi|255965366|gb|ACU44988.1|	594	1e-74	60s ribosomal protein l9 [Pfiesteria piscicida]	sp|P49210|RL9_ORYSJ	224	E:2e-72	RecName: Full=60S ribosomal protein L9;^Eukaryota; Viridiplantae; Streptophyta; Embryophyta; Tracheophyta; Spermatophyta; Magnoliophyta; Liliopsida; Poales; Poaceae; BEP clade; Ehrhartoideae; Oryzeae; Oryza	sp|P49210|RL9_ORYSJ	224	E:1e-72	RecName: Full=60S ribosomal protein L9;^Eukaryota; Viridiplantae; Streptophyta; Embryophyta; Tracheophyta; Spermatophyta; Magnoliophyta; Liliopsida; Poales; Poaceae; BEP clade; Ehrhartoideae; Oryzeae; Oryza	PF00347.18	Ribosomal_L6	Ribosomal protein L6	COG0097	Ribosomal protein L6P/L9E	.	c37197_g1|m.52558	1-588[+]	.	.	GO:0009955|adaxial/abaxial pattern specification;GO:0006412|translation	GO:0019843|rRNA binding;GO:0003735|structural constituent of ribosome	GO:0009941|chloroplast envelope;GO:0022625|cytosolic large ribosomal subunit;GO:0005730|nucleolus;GO:0005886|plasma membrane;GO:0005773|vacuole	K02940|RP-L9e, RPL9; large subunit ribosomal protein L9e	map03010|Ribosome
c50969_g1	45.7465	5.51559	3.95058e-08	1.22325e-05	up	yes	gi|567215041|ref|XM_006411230.1|	1240	0	Eutrema salsugineum hypothetical protein (EUTSA_v10016439mg) mRNA, complete cds	gi|565472192|ref|XP_006293898.1|	2917	0	hypothetical protein CARUB_v10022891mg [Capsella rubella]	sp|Q9SIY8|LAC5_ARATH	1109	E:0	RecName: Full=Laccase-5;^Eukaryota; Viridiplantae; Streptophyta; Embryophyta; Tracheophyta; Spermatophyta; Magnoliophyta; eudicotyledons; core eudicotyledons; rosids; malvids; Brassicales; Brassicaceae; Camelineae; Arabidopsis	sp|Q9SIY8|LAC5_ARATH	1109	E:0	RecName: Full=Laccase-5;^Eukaryota; Viridiplantae; Streptophyta; Embryophyta; Tracheophyta; Spermatophyta; Magnoliophyta; eudicotyledons; core eudicotyledons; rosids; malvids; Brassicales; Brassicaceae; Camelineae; Arabidopsis	PF07732.10	Cu-oxidase_3	Multicopper oxidase	COG2132	Putative multicopper oxidases	.	c50969_g1|m.53549	215-1948[-]	sigP:1^25^0.856^YES	.	GO:0046274|lignin catabolic process;GO:0046688|response to copper ion	GO:0005507|copper ion binding;GO:0052716|hydroquinone:oxygen oxidoreductase activity	GO:0048046|apoplast	K05909|E1.10.3.2; laccase [EC:1.10.3.2]	.
c50966_g2	2.77784	1.47396	4.08135e-06	0.0003505	up	yes	gi|567217291|ref|XM_006412212.1|	510	0	Eutrema salsugineum hypothetical protein (EUTSA_v10024683mg) mRNA, complete cds	gi|727512347|ref|XP_010432464.1|	804	3e-99	PREDICTED: polyadenylate-binding protein 2-like [Camelina sativa]	sp|P42731|PABP2_ARATH	311	E:2e-99	RecName: Full=Polyadenylate-binding protein 2;^Eukaryota; Viridiplantae; Streptophyta; Embryophyta; Tracheophyta; Spermatophyta; Magnoliophyta; eudicotyledons; core eudicotyledons; rosids; malvids; Brassicales; Brassicaceae; Camelineae; Arabidopsis`sp|P42731|PABP2_ARATH	sp|P42731|PABP2_ARATH	311	E:1e-101	RecName: Full=Polyadenylate-binding protein 2;^Eukaryota; Viridiplantae; Streptophyta; Embryophyta; Tracheophyta; Spermatophyta; Magnoliophyta; eudicotyledons; core eudicotyledons; rosids; malvids; Brassicales; Brassicaceae; Camelineae; Arabidopsis`sp|P42731|PABP2_ARATH	PF00076.17	RRM_1	RNA recognition motif. (a.k.a. RRM, RBD, or RNP domain)	COG0724	RNA-binding proteins (RRM domain)	.	c50966_g2|m.54094	1-504[-]	.	.	GO:0009651|response to salt stress	GO:0000166|nucleotide binding;GO:0003743|translation initiation factor activity	GO:0005829|cytosol	K13126|PABPC; polyadenylate-binding protein	map03015|mRNA surveillance pathway;map03013|RNA transport;map03018|RNA degradation
c47765_g1	2.91198	1.542	0.00414108	0.0395012	up	yes	gi|567201663|ref|XM_006407702.1|	684	0	Eutrema salsugineum hypothetical protein (EUTSA_v10020359mg) mRNA, complete cds	gi|567201664|ref|XP_006407765.1|	1389	0	hypothetical protein EUTSA_v10020359mg [Eutrema salsugineum]	sp|Q39033|PLCD2_ARATH	534	E:0	RecName: Full=Phosphoinositide phospholipase C 2;^Eukaryota; Viridiplantae; Streptophyta; Embryophyta; Tracheophyta; Spermatophyta; Magnoliophyta; eudicotyledons; core eudicotyledons; rosids; malvids; Brassicales; Brassicaceae; Camelineae; Arabidopsis	sp|Q39033|PLCD2_ARATH	565	E:0	RecName: Full=Phosphoinositide phospholipase C 2;^Eukaryota; Viridiplantae; Streptophyta; Embryophyta; Tracheophyta; Spermatophyta; Magnoliophyta; eudicotyledons; core eudicotyledons; rosids; malvids; Brassicales; Brassicaceae; Camelineae; Arabidopsis	PF09279.6	EF-hand_like	Phosphoinositide-specific phospholipase C, efhand-like	NOG149692	Phospholipase C	.	c47765_g1|m.54192	1-993[+]	.	.	GO:0035556|intracellular signal transduction;GO:0016042|lipid catabolic process	GO:0005509|calcium ion binding;GO:0004435|phosphatidylinositol phospholipase C activity;GO:0004871|signal transducer activity	GO:0005622|intracellular;GO:0005886|plasma membrane	K05857|PLCD; phosphatidylinositol phospholipase C, delta [EC:3.1.4.11]	map00562|Inositol phosphate metabolism;map04070|Phosphatidylinositol signaling system;map04020|Calcium signaling pathway;map04919|Thyroid hormone signaling pathway;map01100|Metabolic pathways
c49716_g3	33.9069	5.08351	0.000508418	0.0101857	up	yes	gi|297803465|ref|XM_002869571.1|	448	0	Arabidopsis lyrata subsp. lyrata myo-inositol oxygenase 4 (MIOX4), mRNA	gi|674236376|gb|KFK29141.1|	1094	6e-148	hypothetical protein AALP_AA7G093700 [Arabis alpina]	sp|Q8H1S0|MIOX4_ARATH	421	E:3e-147	RecName: Full=Inositol oxygenase 4;^Eukaryota; Viridiplantae; Streptophyta; Embryophyta; Tracheophyta; Spermatophyta; Magnoliophyta; eudicotyledons; core eudicotyledons; rosids; malvids; Brassicales; Brassicaceae; Camelineae; Arabidopsis	sp|Q8H1S0|MIOX4_ARATH	420	E:2e-147	RecName: Full=Inositol oxygenase 4;^Eukaryota; Viridiplantae; Streptophyta; Embryophyta; Tracheophyta; Spermatophyta; Magnoliophyta; eudicotyledons; core eudicotyledons; rosids; malvids; Brassicales; Brassicaceae; Camelineae; Arabidopsis	PF05153.10	DUF706	Family of unknown function (DUF706)	NOG135479	Inositol oxygenase	.	c49716_g3|m.54940	1-672[-]	.	.	GO:0019310|inositol catabolic process;GO:0019853|L-ascorbic acid biosynthetic process	GO:0050113|inositol oxygenase activity;GO:0005506|iron ion binding	GO:0005737|cytoplasm	K00469|MIOX; inositol oxygenase [EC:1.13.99.1]	map00562|Inositol phosphate metabolism;map00053|Ascorbate and aldarate metabolism
c44700_g1	0.448903	-1.15553	6.77072e-05	0.00268946	down	yes	gi|567196782|ref|XM_006406322.1|	392	0	Eutrema salsugineum hypothetical protein (EUTSA_v10020475mg) mRNA, complete cds	gi|727586359|ref|XP_010466227.1|	817	3e-176	PREDICTED: calcium-dependent protein kinase 9-like [Camelina sativa]	sp|Q38868|CDPK9_ARATH	315	E:8e-176	RecName: Full=Calcium-dependent protein kinase 9;^Eukaryota; Viridiplantae; Streptophyta; Embryophyta; Tracheophyta; Spermatophyta; Magnoliophyta; eudicotyledons; core eudicotyledons; rosids; malvids; Brassicales; Brassicaceae; Camelineae; Arabidopsis`sp|Q38868|CDPK9_ARATH	sp|Q38868|CDPK9_ARATH	254	E:3e-81	RecName: Full=Calcium-dependent protein kinase 9;^Eukaryota; Viridiplantae; Streptophyta; Embryophyta; Tracheophyta; Spermatophyta; Magnoliophyta; eudicotyledons; core eudicotyledons; rosids; malvids; Brassicales; Brassicaceae; Camelineae; Arabidopsis	PF00069.20	Pkinase	Protein kinase domain	COG0515	Serine/threonine protein kinase	.	c44700_g1|m.55962	2-382[+]	.	ExpAA=17.11^PredHel=1^Topology=i54-73o	GO:0007165|signal transduction	GO:0005524|ATP binding;GO:0005509|calcium ion binding;GO:0004683|calmodulin-dependent protein kinase activity	GO:0005886|plasma membrane	K13412|CPK; calcium-dependent protein kinase [EC:2.7.11.1]	map04626|Plant-pathogen interaction;map05145|Toxoplasmosis
c44700_g1	0.448903	-1.15553	6.77072e-05	0.00268946	down	yes	gi|567196782|ref|XM_006406322.1|	392	0	Eutrema salsugineum hypothetical protein (EUTSA_v10020475mg) mRNA, complete cds	gi|727586359|ref|XP_010466227.1|	817	3e-176	PREDICTED: calcium-dependent protein kinase 9-like [Camelina sativa]	sp|Q38868|CDPK9_ARATH	315	E:8e-176	RecName: Full=Calcium-dependent protein kinase 9;^Eukaryota; Viridiplantae; Streptophyta; Embryophyta; Tracheophyta; Spermatophyta; Magnoliophyta; eudicotyledons; core eudicotyledons; rosids; malvids; Brassicales; Brassicaceae; Camelineae; Arabidopsis`sp|Q38868|CDPK9_ARATH	sp|Q38868|CDPK9_ARATH	282	E:1e-91	RecName: Full=Calcium-dependent protein kinase 9;^Eukaryota; Viridiplantae; Streptophyta; Embryophyta; Tracheophyta; Spermatophyta; Magnoliophyta; eudicotyledons; core eudicotyledons; rosids; malvids; Brassicales; Brassicaceae; Camelineae; Arabidopsis	PF00036.27	EF-hand_1	EF hand	COG0515	Serine/threonine protein kinase	.	c44700_g1|m.55961	743-1165[+]	.	.	GO:0007165|signal transduction	GO:0005524|ATP binding;GO:0005509|calcium ion binding;GO:0004683|calmodulin-dependent protein kinase activity	GO:0005886|plasma membrane	K13412|CPK; calcium-dependent protein kinase [EC:2.7.11.1]	map04626|Plant-pathogen interaction;map05145|Toxoplasmosis
c45281_g1	37.0663	5.21204	0.000388702	0.00863566	up	yes	gi|575473471|ref|XM_006675966.1|	66	5e-25	Batrachochytrium dendrobatidis JAM81 hypothetical protein (BATDEDRAFT_85823), partial mRNA	gi|167999390|ref|XP_001752400.1|	424	1e-49	predicted protein [Physcomitrella patens]	sp|P14115|RL27A_MOUSE	162	E:9e-49	RecName: Full=60S ribosomal protein L27a;^Eukaryota; Metazoa; Chordata; Craniata; Vertebrata; Euteleostomi; Mammalia; Eutheria; Euarchontoglires; Glires; Rodentia; Sciurognathi; Muroidea; Muridae; Murinae; Mus; Mus	sp|P14115|RL27A_MOUSE	212	E:4e-69	RecName: Full=60S ribosomal protein L27a;^Eukaryota; Metazoa; Chordata; Craniata; Vertebrata; Euteleostomi; Mammalia; Eutheria; Euarchontoglires; Glires; Rodentia; Sciurognathi; Muroidea; Muridae; Murinae; Mus; Mus	PF00828.14	Ribosomal_L18e	Ribosomal protein L18e/L15	COG0200	Ribosomal protein L15	.	c45281_g1|m.56398	161-634[-]	.	.	GO:0006412|translation	GO:0003735|structural constituent of ribosome	GO:0005840|ribosome	K02900|RP-L27Ae, RPL27A; large subunit ribosomal protein L27Ae	map03010|Ribosome
c29834_g1	7.5258	2.91185	0.00236465	0.0274591	up	yes	gi|567212675|ref|XM_006410617.1|	801	0	Eutrema salsugineum hypothetical protein (EUTSA_v10016748mg) mRNA, complete cds	gi|674243649|gb|KFK36414.1|	1633	0	hypothetical protein AALP_AA4G121000 [Arabis alpina]	sp|O82171|AGD10_ARATH	608	E:0	RecName: Full=ADP-ribosylation factor GTPase-activating protein AGD10;^Eukaryota; Viridiplantae; Streptophyta; Embryophyta; Tracheophyta; Spermatophyta; Magnoliophyta; eudicotyledons; core eudicotyledons; rosids; malvids; Brassicales; Brassicaceae; Camelineae; Arabidopsis	sp|O82171|AGD10_ARATH	638	E:0	RecName: Full=ADP-ribosylation factor GTPase-activating protein AGD10;^Eukaryota; Viridiplantae; Streptophyta; Embryophyta; Tracheophyta; Spermatophyta; Magnoliophyta; eudicotyledons; core eudicotyledons; rosids; malvids; Brassicales; Brassicaceae; Camelineae; Arabidopsis	PF01412.13	ArfGap	Putative GTPase activating protein for Arf	COG5347	GTPase-activating protein that regulates ARFs (ADP-ribosylation factors), involved in ARF-mediated vesicular transport	.	c29834_g1|m.56813	3-1283[+]	.	.	GO:0009793|embryo development ending in seed dormancy;GO:0009555|pollen development;GO:0043547|positive regulation of GTPase activity;GO:0032312|regulation of ARF GTPase activity	GO:0008060|ARF GTPase activator activity;GO:0046872|metal ion binding;GO:0008270|zinc ion binding	GO:0005794|Golgi apparatus	K12493|ARFGAP2_3; ADP-ribosylation factor GTPase-activating protein 2/3	map04144|Endocytosis
c49476_g1	4.2084	2.07327	0.004754	0.0432742	up	yes	gi|565499871|ref|XM_006307513.1|	724	0	Capsella rubella hypothetical protein (CARUB_v10009197mg) mRNA, complete cds	gi|674943387|emb|CDX89799.1|	1097	5e-144	BnaA10g02830D [Brassica napus]	sp|Q940Q1|PLY1_ARATH	424	E:2e-144	RecName: Full=Probable pectate lyase 1;^Eukaryota; Viridiplantae; Streptophyta; Embryophyta; Tracheophyta; Spermatophyta; Magnoliophyta; eudicotyledons; core eudicotyledons; rosids; malvids; Brassicales; Brassicaceae; Camelineae; Arabidopsis	sp|Q940Q1|PLY1_ARATH	457	E:5e-160	RecName: Full=Probable pectate lyase 1;^Eukaryota; Viridiplantae; Streptophyta; Embryophyta; Tracheophyta; Spermatophyta; Magnoliophyta; eudicotyledons; core eudicotyledons; rosids; malvids; Brassicales; Brassicaceae; Camelineae; Arabidopsis	PF00544.14	Pec_lyase_C	Pectate lyase	COG3866	Pectate lyase	.	c49476_g1|m.56870	501-1208[-]	.	.	GO:0045490|pectin catabolic process	GO:0046872|metal ion binding;GO:0030570|pectate lyase activity	GO:0016020|membrane	K01728|pel; pectate lyase [EC:4.2.2.2]	map00040|Pentose and glucuronate interconversions
c49881_g2	12.0057	3.58565	0.000969324	0.0154014	up	yes	gi|297811016|ref|XM_002873346.1|	958	0	Arabidopsis lyrata subsp. lyrata hypothetical protein, mRNA	gi|567172022|ref|XP_006399404.1|	2144	0	hypothetical protein EUTSA_v10013452mg [Eutrema salsugineum]	sp|Q54M22|ODBA_DICDI	393	E:1e-128	RecName: Full=2-oxoisovalerate dehydrogenase subunit alpha, mitochondrial;^Eukaryota; Amoebozoa; Mycetozoa; Dictyosteliida; Dictyostelium	sp|Q54M22|ODBA_DICDI	418	E:1e-140	RecName: Full=2-oxoisovalerate dehydrogenase subunit alpha, mitochondrial;^Eukaryota; Amoebozoa; Mycetozoa; Dictyosteliida; Dictyostelium	PF00676.15	E1_dh	Dehydrogenase E1 component	COG1071	Pyruvate/2-oxoglutarate dehydrogenase complex, dehydrogenase (E1) component, eukaryotic type, alpha subunit	.	c49881_g2|m.57453	2-1447[+]	.	.	GO:0009083|branched-chain amino acid catabolic process	GO:0003863|3-methyl-2-oxobutanoate dehydrogenase (2-methylpropanoyl-transferring) activity;GO:0003826|alpha-ketoacid dehydrogenase activity;GO:0046872|metal ion binding	GO:0017086|3-methyl-2-oxobutanoate dehydrogenase (lipoamide) complex	K00166|BCKDHA, bkdA1; 2-oxoisovalerate dehydrogenase E1 component alpha subunit [EC:1.2.4.4]	map01110|Biosynthesis of secondary metabolites;map00280|Valine, leucine and isoleucine degradation;map00640|Propanoate metabolism;map01100|Metabolic pathways;map01130|Biosynthesis of antibiotics
c16523_g2	4.46347	2.15817	0.0015198	0.0206547	up	yes	gi|567174877|ref|XM_006400201.1|	298	4e-154	Eutrema salsugineum hypothetical protein (EUTSA_v10013449mg) mRNA, complete cds	gi|567174878|ref|XP_006400264.1|	450	1e-50	hypothetical protein EUTSA_v10013449mg [Eutrema salsugineum]	sp|P57751|UGPA1_ARATH	172	E:5e-50	RecName: Full=UTP--glucose-1-phosphate uridylyltransferase 1;^Eukaryota; Viridiplantae; Streptophyta; Embryophyta; Tracheophyta; Spermatophyta; Magnoliophyta; eudicotyledons; core eudicotyledons; rosids; malvids; Brassicales; Brassicaceae; Camelineae; Arabidopsis	sp|P57751|UGPA1_ARATH	197	E:4e-60	RecName: Full=UTP--glucose-1-phosphate uridylyltransferase 1;^Eukaryota; Viridiplantae; Streptophyta; Embryophyta; Tracheophyta; Spermatophyta; Magnoliophyta; eudicotyledons; core eudicotyledons; rosids; malvids; Brassicales; Brassicaceae; Camelineae; Arabidopsis	PF01704.13	UDPGP	UTP--glucose-1-phosphate uridylyltransferase	COG4284	UDP-glucose pyrophosphorylase	.	c16523_g2|m.57668	1-330[-]	.	.	GO:0052543|callose deposition in cell wall;GO:0009555|pollen development;GO:0046686|response to cadmium ion;GO:0009651|response to salt stress	GO:0003983|UTP:glucose-1-phosphate uridylyltransferase activity	GO:0005829|cytosol;GO:0005886|plasma membrane	K00963|UGP2, galU, galF; UTP--glucose-1-phosphate uridylyltransferase [EC:2.7.7.9]	map00500|Starch and sucrose metabolism;map00520|Amino sugar and nucleotide sugar metabolism;map00040|Pentose and glucuronate interconversions;map00052|Galactose metabolism;map01100|Metabolic pathways;map01130|Biosynthesis of antibiotics
c52241_g1	0.48499	-1.04397	0.0037084	0.0367071	down	yes	gi|567201604|ref|XM_006407686.1|	387	0	Eutrema salsugineum hypothetical protein (EUTSA_v10021725mg) mRNA, complete cds	gi|674904986|emb|CDY27984.1|	712	6e-87	BnaC05g43860D [Brassica napus]	sp|Q9C9Y6|TRXH9_ARATH	265	E:3e-84	RecName: Full=Thioredoxin H9;^Eukaryota; Viridiplantae; Streptophyta; Embryophyta; Tracheophyta; Spermatophyta; Magnoliophyta; eudicotyledons; core eudicotyledons; rosids; malvids; Brassicales; Brassicaceae; Camelineae; Arabidopsis	sp|Q9C9Y6|TRXH9_ARATH	265	E:3e-90	RecName: Full=Thioredoxin H9;^Eukaryota; Viridiplantae; Streptophyta; Embryophyta; Tracheophyta; Spermatophyta; Magnoliophyta; eudicotyledons; core eudicotyledons; rosids; malvids; Brassicales; Brassicaceae; Camelineae; Arabidopsis	PF00085.15	Thioredoxin	Thioredoxin	COG0526	Thiol-disulfide isomerase and thioredoxins	.	c52241_g1|m.57822	789-1211[-]	.	.	GO:0007154|cell communication;GO:0045454|cell redox homeostasis;GO:0022900|electron transport chain;GO:0006662|glycerol ether metabolic process	GO:0009055|electron carrier activity;GO:0015035|protein disulfide oxidoreductase activity	GO:0005829|cytosol;GO:0005634|nucleus;GO:0005886|plasma membrane;GO:0009536|plastid	K03671|trxA; thioredoxin 1	map00450|Selenocompound metabolism;map00240|Pyrimidine metabolism
c52534_g1	5.37988	2.42757	0.00418181	0.0397792	up	yes	gi|312282054|dbj|AK352807.1|	1731	0	Thellungiella halophila mRNA, complete cds, clone: RTFL01-04-C15	gi|567161240|ref|XP_006396404.1|	3501	0	hypothetical protein EUTSA_v10028471mg [Eutrema salsugineum]	sp|P43299|PROL_ARATH	1343	E:0	RecName: Full=Protein PROLIFERA;^Eukaryota; Viridiplantae; Streptophyta; Embryophyta; Tracheophyta; Spermatophyta; Magnoliophyta; eudicotyledons; core eudicotyledons; rosids; malvids; Brassicales; Brassicaceae; Camelineae; Arabidopsis	sp|P43299|PROL_ARATH	1415	E:0	RecName: Full=Protein PROLIFERA;^Eukaryota; Viridiplantae; Streptophyta; Embryophyta; Tracheophyta; Spermatophyta; Magnoliophyta; eudicotyledons; core eudicotyledons; rosids; malvids; Brassicales; Brassicaceae; Camelineae; Arabidopsis	PF00493.18	MCM	MCM2/3/5 family	COG1241	Predicted ATPase involved in replication control, Cdc46/Mcm family	.	c52534_g1|m.60870	275-2425[-]	.	.	GO:0007049|cell cycle;GO:0006270|DNA replication initiation;GO:0006268|DNA unwinding involved in replication;GO:0006355|regulation of transcription, DNA-dependent;GO:0010182|sugar mediated signaling pathway;GO:0006351|transcription, DNA-dependent	GO:0005524|ATP binding;GO:0003677|DNA binding;GO:0017111|nucleoside-triphosphatase activity	GO:0005737|cytoplasm;GO:0005634|nucleus	K02210|MCM7, CDC47; DNA replication licensing factor MCM7 [EC:3.6.4.12]	map03030|DNA replication;map04113|Meiosis - yeast;map04110|Cell cycle;map04111|Cell cycle - yeast
c51134_g1	0.404588	-1.30548	0.00127529	0.0183774	down	yes	gi|567160789|ref|XM_006396212.1|	570	0	Eutrema salsugineum hypothetical protein (EUTSA_v10028738mg) mRNA, complete cds	gi|567160790|ref|XP_006396275.1|	1212	2e-158	hypothetical protein EUTSA_v10028738mg [Eutrema salsugineum]	sp|Q39024|MPK4_ARATH	469	E:6e-159	RecName: Full=Mitogen-activated protein kinase 4;^Eukaryota; Viridiplantae; Streptophyta; Embryophyta; Tracheophyta; Spermatophyta; Magnoliophyta; eudicotyledons; core eudicotyledons; rosids; malvids; Brassicales; Brassicaceae; Camelineae; Arabidopsis`sp|Q39024|MPK4_ARATH	sp|Q39024|MPK4_ARATH	363	E:9e-125	RecName: Full=Mitogen-activated protein kinase 4;^Eukaryota; Viridiplantae; Streptophyta; Embryophyta; Tracheophyta; Spermatophyta; Magnoliophyta; eudicotyledons; core eudicotyledons; rosids; malvids; Brassicales; Brassicaceae; Camelineae; Arabidopsis	PF00069.20	Pkinase	Protein kinase domain	COG0515	Serine/threonine protein kinase	.	c51134_g1|m.61113	1110-1643[+]	.	.	GO:0043622|cortical microtubule organization;GO:0006972|hyperosmotic response;GO:0042539|hypotonic salinity response;GO:0009868|jasmonic acid and ethylene-dependent systemic resistance, jasmonic acid mediated signaling pathway;GO:0007112|male meiosis cytokinesis;GO:0009555|pollen development;GO:0009737|response to abscisic acid stimulus;GO:0009409|response to cold;GO:0009620|response to fungus;GO…	GO:0005524|ATP binding;GO:0004707|MAP kinase activity	GO:0005829|cytosol;GO:0005874|microtubule;GO:0005634|nucleus	K04371|MAPK1_3; mitogen-activated protein kinase 1/3 [EC:2.7.11.24]	map04915|Estrogen signaling pathway;map04071|Sphingolipid signaling pathway;map04013|MAPK signaling pathway - fly;map04620|Toll-like receptor signaling pathway;map04621|NOD-like receptor signaling pathway;map04150|mTOR signaling pathway;map04151|PI3K-Akt signaling pathway;map05205|Proteoglycans in cancer;map04360|Axon guidance;map05145|Toxoplasmosis;map04320|Dorso-ventral axis formation;map05200|…
c51134_g1	0.404588	-1.30548	0.00127529	0.0183774	down	yes	gi|567160789|ref|XM_006396212.1|	570	0	Eutrema salsugineum hypothetical protein (EUTSA_v10028738mg) mRNA, complete cds	gi|567160790|ref|XP_006396275.1|	1212	2e-158	hypothetical protein EUTSA_v10028738mg [Eutrema salsugineum]	sp|Q39024|MPK4_ARATH	469	E:6e-159	RecName: Full=Mitogen-activated protein kinase 4;^Eukaryota; Viridiplantae; Streptophyta; Embryophyta; Tracheophyta; Spermatophyta; Magnoliophyta; eudicotyledons; core eudicotyledons; rosids; malvids; Brassicales; Brassicaceae; Camelineae; Arabidopsis`sp|Q39024|MPK4_ARATH	sp|Q39024|MPK4_ARATH	287	E:2e-95	RecName: Full=Mitogen-activated protein kinase 4;^Eukaryota; Viridiplantae; Streptophyta; Embryophyta; Tracheophyta; Spermatophyta; Magnoliophyta; eudicotyledons; core eudicotyledons; rosids; malvids; Brassicales; Brassicaceae; Camelineae; Arabidopsis	PF00069.20	Pkinase	Protein kinase domain	COG0515	Serine/threonine protein kinase	.	c51134_g1|m.61114	213-683[+]	.	.	GO:0043622|cortical microtubule organization;GO:0006972|hyperosmotic response;GO:0042539|hypotonic salinity response;GO:0009868|jasmonic acid and ethylene-dependent systemic resistance, jasmonic acid mediated signaling pathway;GO:0007112|male meiosis cytokinesis;GO:0009555|pollen development;GO:0009737|response to abscisic acid stimulus;GO:0009409|response to cold;GO:0009620|response to fungus;GO…	GO:0005524|ATP binding;GO:0004707|MAP kinase activity	GO:0005829|cytosol;GO:0005874|microtubule;GO:0005634|nucleus	K04371|MAPK1_3; mitogen-activated protein kinase 1/3 [EC:2.7.11.24]	map04915|Estrogen signaling pathway;map04071|Sphingolipid signaling pathway;map04013|MAPK signaling pathway - fly;map04620|Toll-like receptor signaling pathway;map04621|NOD-like receptor signaling pathway;map04150|mTOR signaling pathway;map04151|PI3K-Akt signaling pathway;map05205|Proteoglycans in cancer;map04360|Axon guidance;map05145|Toxoplasmosis;map04320|Dorso-ventral axis formation;map05200|…
c41269_g2	4.92116	2.299	1.14726e-07	2.72643e-05	up	yes	gi|567123116|ref|XM_006390754.1|	1968	0	Eutrema salsugineum hypothetical protein (EUTSA_v10018002mg) mRNA, complete cds	gi|567123117|ref|XP_006390816.1|	4114	0	hypothetical protein EUTSA_v10018002mg [Eutrema salsugineum]	sp|Q9Z1T6|FYV1_MOUSE	196	E:1e-49	RecName: Full=1-phosphatidylinositol 3-phosphate 5-kinase;^Eukaryota; Metazoa; Chordata; Craniata; Vertebrata; Euteleostomi; Mammalia; Eutheria; Euarchontoglires; Glires; Rodentia; Sciurognathi; Muroidea; Muridae; Murinae; Mus; Mus`sp|Q9Z1T6|FYV1_MOUSE	sp|Q9Z1T6|FYV1_MOUSE	197	E:3e-50	RecName: Full=1-phosphatidylinositol 3-phosphate 5-kinase;^Eukaryota; Metazoa; Chordata; Craniata; Vertebrata; Euteleostomi; Mammalia; Eutheria; Euarchontoglires; Glires; Rodentia; Sciurognathi; Muroidea; Muridae; Murinae; Mus; Mus`sp|Q9Z1T6|FYV1_MOUSE	PF00118.19	Cpn60_TCP1	TCP-1/cpn60 chaperonin family	COG0459	Chaperonin GroEL (HSP60 family)	.	c41269_g2|m.61345	1-2817[-]	.	.	GO:0044267|cellular protein metabolic process;GO:0035556|intracellular signal transduction;GO:0032288|myelin assembly;GO:0034504|protein localization to nucleus;GO:0042147|retrograde transport, endosome to Golgi	GO:0000285|1-phosphatidylinositol-3-phosphate 5-kinase activity;GO:0016308|1-phosphatidylinositol-4-phosphate 5-kinase activity;GO:0052810|1-phosphatidylinositol-5-kinase activity;GO:0005524|ATP binding;GO:0046872|metal ion binding;GO:0008270|zinc ion binding	GO:0031410|cytoplasmic vesicle;GO:0030659|cytoplasmic vesicle membrane;GO:0005829|cytosol;GO:0031901|early endosome membrane;GO:0000139|Golgi membrane;GO:0031902|late endosome membrane;GO:0045121|membrane raft;GO:0048471|perinuclear region of cytoplasm;GO:0012506|vesicle membrane	K00921|PIKFYVE, FAB1; 1-phosphatidylinositol-3-phosphate 5-kinase [EC:2.7.1.150]	map00562|Inositol phosphate metabolism;map04070|Phosphatidylinositol signaling system;map04145|Phagosome;map04810|Regulation of actin cytoskeleton
c45383_g4	44.592	5.47871	2.34218e-05	0.0012685	up	yes	gi|567151907|ref|XM_006416998.1|	1223	0	Eutrema salsugineum hypothetical protein (EUTSA_v10007297mg) mRNA, complete cds	gi|567151908|ref|XP_006417061.1|	2585	0	hypothetical protein EUTSA_v10007297mg [Eutrema salsugineum]	sp|Q9XI81|FUT7_ARATH	862	E:0	RecName: Full=Probable fucosyltransferase 7;^Eukaryota; Viridiplantae; Streptophyta; Embryophyta; Tracheophyta; Spermatophyta; Magnoliophyta; eudicotyledons; core eudicotyledons; rosids; malvids; Brassicales; Brassicaceae; Camelineae; Arabidopsis	sp|Q9XI81|FUT7_ARATH	862	E:0	RecName: Full=Probable fucosyltransferase 7;^Eukaryota; Viridiplantae; Streptophyta; Embryophyta; Tracheophyta; Spermatophyta; Magnoliophyta; eudicotyledons; core eudicotyledons; rosids; malvids; Brassicales; Brassicaceae; Camelineae; Arabidopsis	PF03254.8	XG_FTase	Xyloglucan fucosyltransferase	euNOG05888	Fucosyltransferase	.	c45383_g4|m.61407	123-1757[-]	.	ExpAA=43.48^PredHel=2^Topology=o25-47i150-172o	GO:0042546|cell wall biogenesis;GO:0006486|protein glycosylation	GO:0008107|galactoside 2-alpha-L-fucosyltransferase activity	GO:0032580|Golgi cisterna membrane;GO:0016021|integral to membrane	K13681|FUT; xyloglucan fucosyltransferase [EC:2.4.1.-]	.
c45179_g1	58.2631	5.86451	4.93363e-07	7.47282e-05	up	yes	gi|567219681|ref|XM_006413407.1|	1153	0	Eutrema salsugineum hypothetical protein (EUTSA_v10024988mg) mRNA, complete cds	gi|727552308|ref|XP_010448605.1|	2243	0	PREDICTED: uncharacterized protein LOC104731047 [Camelina sativa]	sp|P59337|DHAA_BRAJA	53.9	E:2e-06	RecName: Full=Haloalkane dehalogenase;^Bacteria; Proteobacteria; Alphaproteobacteria; Rhizobiales; Bradyrhizobiaceae; Bradyrhizobium	sp|P59337|DHAA_BRAJA	54.3	E:1e-06	RecName: Full=Haloalkane dehalogenase;^Bacteria; Proteobacteria; Alphaproteobacteria; Rhizobiales; Bradyrhizobiaceae; Bradyrhizobium	PF12697.2	Abhydrolase_6	Alpha/beta hydrolase family	COG0596	Predicted hydrolases or acyltransferases (alpha/beta hydrolase superfamily)	.	c45179_g1|m.61444	213-1700[+]	.	ExpAA=19.55^PredHel=1^Topology=i13-32o	GO:0008152|metabolic process	GO:0018786|haloalkane dehalogenase activity	.	K01563|dhaA; haloalkane dehalogenase [EC:3.8.1.5]	map01120|Microbial metabolism in diverse environments;map01100|Metabolic pathways;map00361|Chlorocyclohexane and chlorobenzene degradation;map00625|Chloroalkane and chloroalkene degradation
c48133_g1	40.972	5.35657	0.000338673	0.00783239	up	yes	gi|388507387|gb|BT141966.1|	436	0	Lotus japonicus clone JCVI-FLLj-12M4 unknown mRNA	gi|388507388|gb|AFK41760.1|	1194	7e-163	unknown [Lotus japonicus]	sp|Q9SIP7|RS31_ARATH	343	E:8e-117	RecName: Full=40S ribosomal protein S3-1;^Eukaryota; Viridiplantae; Streptophyta; Embryophyta; Tracheophyta; Spermatophyta; Magnoliophyta; eudicotyledons; core eudicotyledons; rosids; malvids; Brassicales; Brassicaceae; Camelineae; Arabidopsis	sp|Q9SIP7|RS31_ARATH	343	E:1e-117	RecName: Full=40S ribosomal protein S3-1;^Eukaryota; Viridiplantae; Streptophyta; Embryophyta; Tracheophyta; Spermatophyta; Magnoliophyta; eudicotyledons; core eudicotyledons; rosids; malvids; Brassicales; Brassicaceae; Camelineae; Arabidopsis	PF07650.12	KH_2	KH domain	COG0092	Ribosomal protein S3	.	c48133_g1|m.62471	138-911[-]	.	.	GO:0009651|response to salt stress;GO:0006412|translation	GO:0003723|RNA binding;GO:0003735|structural constituent of ribosome	GO:0009507|chloroplast;GO:0022627|cytosolic small ribosomal subunit;GO:0009506|plasmodesma;GO:0005774|vacuolar membrane	K02985|RP-S3e, RPS3; small subunit ribosomal protein S3e	map03010|Ribosome
c52809_g2	8.01575	3.00284	3.83254e-14	1.76086e-10	up	yes	gi|567199575|ref|XM_006407111.1|	639	0	Eutrema salsugineum hypothetical protein (EUTSA_v10020056mg) mRNA, complete cds	gi|727413406|ref|XP_010501131.1|	1386	0	PREDICTED: beta-galactosidase 1-like [Camelina sativa]	sp|Q9SCW1|BGAL1_ARATH	529	E:0	RecName: Full=Beta-galactosidase 1;^Eukaryota; Viridiplantae; Streptophyta; Embryophyta; Tracheophyta; Spermatophyta; Magnoliophyta; eudicotyledons; core eudicotyledons; rosids; malvids; Brassicales; Brassicaceae; Camelineae; Arabidopsis	sp|Q9SCW1|BGAL1_ARATH	529	E:0	RecName: Full=Beta-galactosidase 1;^Eukaryota; Viridiplantae; Streptophyta; Embryophyta; Tracheophyta; Spermatophyta; Magnoliophyta; eudicotyledons; core eudicotyledons; rosids; malvids; Brassicales; Brassicaceae; Camelineae; Arabidopsis	PF01301.14	Glyco_hydro_35	Glycosyl hydrolases family 35	COG1874	Beta-galactosidase	.	c52809_g2|m.62508	187-972[+]	sigP:1^31^0.565^YES	ExpAA=24.14^PredHel=1^Topology=i13-35o	GO:0005975|carbohydrate metabolic process	GO:0004565|beta-galactosidase activity;GO:0030246|carbohydrate binding;GO:0043169|cation binding	GO:0048046|apoplast;GO:0009505|plant-type cell wall;GO:0009506|plasmodesma	.	.
c51930_g3	2.86962	1.52086	0.00219499	0.0260756	up	yes	gi|297831643|ref|XM_002883658.1|	1298	0	Arabidopsis lyrata subsp. lyrata hypothetical protein, mRNA	gi|674246566|gb|KFK39331.1|	3474	0	hypothetical protein AALP_AA3G230700 [Arabis alpina]	sp|Q9SIB9|ACO2M_ARATH	1334	E:0	RecName: Full=Aconitate hydratase 2, mitochondrial;^Eukaryota; Viridiplantae; Streptophyta; Embryophyta; Tracheophyta; Spermatophyta; Magnoliophyta; eudicotyledons; core eudicotyledons; rosids; malvids; Brassicales; Brassicaceae; Camelineae; Arabidopsis	sp|Q9SIB9|ACO2M_ARATH	1357	E:0	RecName: Full=Aconitate hydratase 2, mitochondrial;^Eukaryota; Viridiplantae; Streptophyta; Embryophyta; Tracheophyta; Spermatophyta; Magnoliophyta; eudicotyledons; core eudicotyledons; rosids; malvids; Brassicales; Brassicaceae; Camelineae; Arabidopsis	PF00330.15	Aconitase	Aconitase family (aconitate hydratase)	COG1048	Aconitase A	.	c51930_g3|m.62767	3-2084[-]	.	.	GO:0006101|citrate metabolic process;GO:0006097|glyoxylate cycle;GO:0006102|isocitrate metabolic process;GO:0009737|response to abscisic acid stimulus;GO:0046686|response to cadmium ion;GO:0006979|response to oxidative stress;GO:0009651|response to salt stress;GO:0006099|tricarboxylic acid cycle	GO:0051539|4 iron, 4 sulfur cluster binding;GO:0003994|aconitate hydratase activity;GO:0005524|ATP binding;GO:0052632|citrate hydro-lyase (cis-aconitate-forming) activity;GO:0005507|copper ion binding;GO:0052633|isocitrate hydro-lyase (cis-aconitate-forming) activity	GO:0005618|cell wall;GO:0009570|chloroplast stroma;GO:0005829|cytosol;GO:0005739|mitochondrion;GO:0005774|vacuolar membrane	K01681|ACO, acnA; aconitate hydratase [EC:4.2.1.3]	map01200|Carbon metabolism;map00630|Glyoxylate and dicarboxylate metabolism;map00020|Citrate cycle (TCA cycle);map01210|2-Oxocarboxylic acid metabolism;map01230|Biosynthesis of amino acids;map00720|Carbon fixation pathways in prokaryotes;map01110|Biosynthesis of secondary metabolites;map01100|Metabolic pathways;map01120|Microbial metabolism in diverse environments;map01130|Biosynthesis of antibio…
c41281_g1	8.33469	3.05913	0.000148813	0.00459554	up	yes	gi|567197281|ref|XM_006406462.1|	1284	0	Eutrema salsugineum hypothetical protein (EUTSA_v10020013mg) mRNA, complete cds	gi|567197282|ref|XP_006406525.1|	2639	0	hypothetical protein EUTSA_v10020013mg [Eutrema salsugineum]	sp|A4PBL4|RAD54_ORYSJ	729	E:0	RecName: Full=DNA repair and recombination protein RAD54;^Eukaryota; Viridiplantae; Streptophyta; Embryophyta; Tracheophyta; Spermatophyta; Magnoliophyta; Liliopsida; Poales; Poaceae; BEP clade; Ehrhartoideae; Oryzeae; Oryza`sp|A4PBL4|RAD54_ORYSJ	sp|A4PBL4|RAD54_ORYSJ	442	E:1e-144	RecName: Full=DNA repair and recombination protein RAD54;^Eukaryota; Viridiplantae; Streptophyta; Embryophyta; Tracheophyta; Spermatophyta; Magnoliophyta; Liliopsida; Poales; Poaceae; BEP clade; Ehrhartoideae; Oryzeae; Oryza	PF00176.18	SNF2_N	SNF2 family N-terminal domain	COG0553	Superfamily II DNA/RNA helicases, SNF2 family	.	c41281_g1|m.63394	1839-3020[-]	.	.	GO:0051301|cell division;GO:0000724|double-strand break repair via homologous recombination;GO:0007067|mitosis;GO:0010332|response to gamma radiation	GO:0005524|ATP binding;GO:0003677|DNA binding;GO:0004386|helicase activity	GO:0005634|nucleus	K10875|RAD54L, RAD54; DNA repair and recombination protein RAD54 and RAD54-like protein [EC:3.6.4.-]	map03440|Homologous recombination
c41281_g1	8.33469	3.05913	0.000148813	0.00459554	up	yes	gi|567197281|ref|XM_006406462.1|	1284	0	Eutrema salsugineum hypothetical protein (EUTSA_v10020013mg) mRNA, complete cds	gi|567197282|ref|XP_006406525.1|	2639	0	hypothetical protein EUTSA_v10020013mg [Eutrema salsugineum]	sp|A4PBL4|RAD54_ORYSJ	729	E:0	RecName: Full=DNA repair and recombination protein RAD54;^Eukaryota; Viridiplantae; Streptophyta; Embryophyta; Tracheophyta; Spermatophyta; Magnoliophyta; Liliopsida; Poales; Poaceae; BEP clade; Ehrhartoideae; Oryzeae; Oryza`sp|A4PBL4|RAD54_ORYSJ	sp|A4PBL4|RAD54_ORYSJ	729	E:0	RecName: Full=DNA repair and recombination protein RAD54;^Eukaryota; Viridiplantae; Streptophyta; Embryophyta; Tracheophyta; Spermatophyta; Magnoliophyta; Liliopsida; Poales; Poaceae; BEP clade; Ehrhartoideae; Oryzeae; Oryza	PF00176.18	SNF2_N	SNF2 family N-terminal domain	COG0553	Superfamily II DNA/RNA helicases, SNF2 family	.	c41281_g1|m.63393	106-1773[-]	.	.	GO:0051301|cell division;GO:0000724|double-strand break repair via homologous recombination;GO:0007067|mitosis;GO:0010332|response to gamma radiation	GO:0005524|ATP binding;GO:0003677|DNA binding;GO:0004386|helicase activity	GO:0005634|nucleus	K10875|RAD54L, RAD54; DNA repair and recombination protein RAD54 and RAD54-like protein [EC:3.6.4.-]	map03440|Homologous recombination
c44017_g2	6.71261	2.74687	0.000203731	0.00564447	up	yes	gi|567216873|ref|XM_006412003.1|	535	0	Eutrema salsugineum hypothetical protein (EUTSA_v10024545mg) mRNA, complete cds	gi|674237452|gb|KFK30217.1|	1113	4e-149	hypothetical protein AALP_AA7G233000 [Arabis alpina]	sp|Q9FT72|RQL3_ARATH	436	E:4e-146	RecName: Full=ATP-dependent DNA helicase Q-like 3;^Eukaryota; Viridiplantae; Streptophyta; Embryophyta; Tracheophyta; Spermatophyta; Magnoliophyta; eudicotyledons; core eudicotyledons; rosids; malvids; Brassicales; Brassicaceae; Camelineae; Arabidopsis	sp|Q9FT72|RQL3_ARATH	453	E:1e-154	RecName: Full=ATP-dependent DNA helicase Q-like 3;^Eukaryota; Viridiplantae; Streptophyta; Embryophyta; Tracheophyta; Spermatophyta; Magnoliophyta; eudicotyledons; core eudicotyledons; rosids; malvids; Brassicales; Brassicaceae; Camelineae; Arabidopsis	PF00270.24	DEAD	DEAD/DEAH box helicase	COG0514	Superfamily II DNA helicase	.	c44017_g2|m.63448	85-804[-]	.	.	GO:0006310|DNA recombination	GO:0043138|3'-5' DNA helicase activity;GO:0005524|ATP binding;GO:0008026|ATP-dependent helicase activity;GO:0009378|four-way junction helicase activity;GO:0046872|metal ion binding;GO:0003676|nucleic acid binding	GO:0005634|nucleus	K10901|BLM, RECQL3, SGS1; bloom syndrome protein [EC:3.6.4.12]	map03440|Homologous recombination;map03460|Fanconi anemia pathway
c47184_g7	7.39502	2.88655	6.56509e-07	8.91526e-05	up	yes	gi|567176034|ref|XM_006400549.1|	1330	0	Eutrema salsugineum hypothetical protein (EUTSA_v10012431mg) mRNA, complete cds	gi|567176035|ref|XP_006400612.1|	2559	0	hypothetical protein EUTSA_v10012431mg [Eutrema salsugineum]	sp|P08799|MYS2_DICDI	449	E:1e-138	RecName: Full=Myosin-2 heavy chain;^Eukaryota; Amoebozoa; Mycetozoa; Dictyosteliida; Dictyostelium	sp|P08799|MYS2_DICDI	449	E:4e-140	RecName: Full=Myosin-2 heavy chain;^Eukaryota; Amoebozoa; Mycetozoa; Dictyosteliida; Dictyostelium	PF02736.14	Myosin_N	Myosin N-terminal SH3-like domain	COG5022	Myosin heavy chain	.	c47184_g7|m.63737	303-1721[+]	.	.	GO:0033275|actin-myosin filament sliding;GO:0032060|bleb assembly;GO:0006935|chemotaxis;GO:0030038|contractile actin filament bundle assembly;GO:0030866|cortical actin cytoskeleton organization;GO:0031154|culmination involved in sorocarp development;GO:0000910|cytokinesis;GO:0060328|cytoplasmic actin-based contraction involved in forward cell motility;GO:0046847|filopodium assembly;GO:0031034|myo…	GO:0051015|actin filament binding;GO:0030898|actin-dependent ATPase activity;GO:0005524|ATP binding;GO:0000146|microfilament motor activity;GO:0042803|protein homodimerization activity	GO:0042641|actomyosin;GO:0005826|actomyosin contractile ring;GO:0045179|apical cortex;GO:0032009|early phagosome;GO:0032982|myosin filament;GO:0016460|myosin II complex;GO:0001931|uropod	K10352|MYH; myosin heavy chain	map04530|Tight junction
c52385_g3	170.786	7.41605	1.23633e-10	1.48183e-07	up	yes	gi|311692749|gb|HQ338092.1|	496	0	Brassica rapa cultivar Fast Plant class III heme peroxidase mRNA, partial cds	gi|727511763|ref|XP_010432175.1|	1217	2e-166	PREDICTED: peroxidase 49 [Camelina sativa]	sp|O23237|PER49_ARATH	465	E:2e-164	RecName: Full=Peroxidase 49;^Eukaryota; Viridiplantae; Streptophyta; Embryophyta; Tracheophyta; Spermatophyta; Magnoliophyta; eudicotyledons; core eudicotyledons; rosids; malvids; Brassicales; Brassicaceae; Camelineae; Arabidopsis	sp|O23237|PER49_ARATH	465	E:2e-164	RecName: Full=Peroxidase 49;^Eukaryota; Viridiplantae; Streptophyta; Embryophyta; Tracheophyta; Spermatophyta; Magnoliophyta; eudicotyledons; core eudicotyledons; rosids; malvids; Brassicales; Brassicaceae; Camelineae; Arabidopsis	PF00141.18	peroxidase	Peroxidase	NOG260566	Has a glutathione-disulfide oxidoreductase activity in the presence of NADPH and glutathione reductase. Reduces low molecular weight disulfides and proteins (By similarity)	.	c52385_g3|m.63907	1-741[-]	.	.	GO:0042744|hydrogen peroxide catabolic process	GO:0020037|heme binding;GO:0046872|metal ion binding;GO:0004601|peroxidase activity	GO:0005618|cell wall;GO:0005576|extracellular region	K00430|E1.11.1.7; peroxidase [EC:1.11.1.7]	map01100|Metabolic pathways;map00940|Phenylpropanoid biosynthesis;map01110|Biosynthesis of secondary metabolites
c48919_g1	3.69129	1.88413	0.0013779	0.0192913	up	yes	gi|567148554|ref|XM_006416053.1|	489	0	Eutrema salsugineum hypothetical protein (EUTSA_v10007178mg) mRNA, complete cds	gi|674891281|emb|CDY41458.1|	1015	5e-132	BnaA08g20600D [Brassica napus]	sp|O49299|PGMC1_ARATH	387	E:5e-130	RecName: Full=Probable phosphoglucomutase, cytoplasmic 1;^Eukaryota; Viridiplantae; Streptophyta; Embryophyta; Tracheophyta; Spermatophyta; Magnoliophyta; eudicotyledons; core eudicotyledons; rosids; malvids; Brassicales; Brassicaceae; Camelineae; Arabidopsis	sp|O49299|PGMC1_ARATH	387	E:5e-131	RecName: Full=Probable phosphoglucomutase, cytoplasmic 1;^Eukaryota; Viridiplantae; Streptophyta; Embryophyta; Tracheophyta; Spermatophyta; Magnoliophyta; eudicotyledons; core eudicotyledons; rosids; malvids; Brassicales; Brassicaceae; Camelineae; Arabidopsis	PF02878.11	PGM_PMM_I	Phosphoglucomutase/phosphomannomutase, alpha/beta/alpha domain I	COG0033	Phosphoglucomutase	.	c48919_g1|m.63953	163-756[+]	.	.	GO:0006874|cellular calcium ion homeostasis;GO:0009590|detection of gravity;GO:0019388|galactose catabolic process;GO:0048229|gametophyte development;GO:0019255|glucose 1-phosphate metabolic process;GO:0006006|glucose metabolic process;GO:0046686|response to cadmium ion;GO:0019252|starch biosynthetic process;GO:0005992|trehalose biosynthetic process	GO:0000287|magnesium ion binding;GO:0004614|phosphoglucomutase activity	GO:0009570|chloroplast stroma;GO:0044445|cytosolic part;GO:0005634|nucleus;GO:0005886|plasma membrane;GO:0010319|stromule	K01835|pgm; phosphoglucomutase [EC:5.4.2.2]	map00030|Pentose phosphate pathway;map00500|Starch and sucrose metabolism;map00010|Glycolysis / Gluconeogenesis;map00521|Streptomycin biosynthesis;map00520|Amino sugar and nucleotide sugar metabolism;map01110|Biosynthesis of secondary metabolites;map01100|Metabolic pathways;map00230|Purine metabolism;map01120|Microbial metabolism in diverse environments;map00052|Galactose metabolism;map01130|Bios…
c35521_g1	2.42368	1.2772	0.00194087	0.0239928	up	yes	gi|567208337|ref|XM_006409485.1|	277	3e-142	Eutrema salsugineum hypothetical protein (EUTSA_v10022589mg) mRNA, complete cds	gi|567208338|ref|XP_006409548.1|	472	5e-52	hypothetical protein EUTSA_v10022589mg [Eutrema salsugineum]	sp|P42731|PABP2_ARATH	166	E:3e-46	RecName: Full=Polyadenylate-binding protein 2;^Eukaryota; Viridiplantae; Streptophyta; Embryophyta; Tracheophyta; Spermatophyta; Magnoliophyta; eudicotyledons; core eudicotyledons; rosids; malvids; Brassicales; Brassicaceae; Camelineae; Arabidopsis`sp|P42731|PABP2_ARATH	sp|P42731|PABP2_ARATH	166	E:9e-48	RecName: Full=Polyadenylate-binding protein 2;^Eukaryota; Viridiplantae; Streptophyta; Embryophyta; Tracheophyta; Spermatophyta; Magnoliophyta; eudicotyledons; core eudicotyledons; rosids; malvids; Brassicales; Brassicaceae; Camelineae; Arabidopsis`sp|P42731|PABP2_ARATH	PF00076.17	RRM_1	RNA recognition motif. (a.k.a. RRM, RBD, or RNP domain)	COG0724	RNA-binding proteins (RRM domain)	.	c35521_g1|m.64365	304-639[+]	.	.	GO:0009651|response to salt stress	GO:0000166|nucleotide binding;GO:0003743|translation initiation factor activity	GO:0005829|cytosol	K13126|PABPC; polyadenylate-binding protein	map03015|mRNA surveillance pathway;map03013|RNA transport;map03018|RNA degradation
c51195_g1	2.14129	1.09848	0.00074618	0.0130272	up	yes	gi|567203417|ref|XM_006408177.1|	1497	0	Eutrema salsugineum hypothetical protein (EUTSA_v10020173mg) mRNA, complete cds	gi|15228670|ref|NP_187044.1|	2902	0	protein kinase family protein [Arabidopsis thaliana]	sp|P54367|KC1A_DROME	206	E:3e-58	RecName: Full=Casein kinase I isoform alpha;^Eukaryota; Metazoa; Ecdysozoa; Arthropoda; Hexapoda; Insecta; Pterygota; Neoptera; Endopterygota; Diptera; Brachycera; Muscomorpha; Ephydroidea; Drosophilidae; Drosophila; Sophophora	sp|P54367|KC1A_DROME	205	E:6e-59	RecName: Full=Casein kinase I isoform alpha;^Eukaryota; Metazoa; Ecdysozoa; Arthropoda; Hexapoda; Insecta; Pterygota; Neoptera; Endopterygota; Diptera; Brachycera; Muscomorpha; Ephydroidea; Drosophilidae; Drosophila; Sophophora	PF00069.20	Pkinase	Protein kinase domain	COG0515	Serine/threonine protein kinase	.	c51195_g1|m.64475	362-2059[+]	.	.	GO:0000902|cell morphogenesis;GO:0006281|DNA repair;GO:0002121|inter-male aggressive behavior;GO:0045879|negative regulation of smoothened signaling pathway;GO:0022008|neurogenesis;GO:0006911|phagocytosis, engulfment;GO:0030163|protein catabolic process;GO:0030162|regulation of proteolysis;GO:0030111|regulation of Wnt receptor signaling pathway;GO:0016055|Wnt receptor signaling pathway	GO:0005524|ATP binding;GO:0004674|protein serine/threonine kinase activity	GO:0005737|cytoplasm;GO:0005634|nucleus	K08957|CSNK1A; casein kinase 1, alpha [EC:2.7.11.1]	map04340|Hedgehog signaling pathway;map04310|Wnt signaling pathway
c42466_g1	85.9337	6.42515	3.36332e-09	1.62661e-06	up	yes	gi|567128198|ref|XM_006391897.1|	927	0	Eutrema salsugineum hypothetical protein (EUTSA_v10023411mg) mRNA, complete cds	gi|567128199|ref|XP_006391959.1|	2036	0	hypothetical protein EUTSA_v10023411mg [Eutrema salsugineum]	sp|O80690|BGL46_ARATH	743	E:0	RecName: Full=Beta-glucosidase 46;^Eukaryota; Viridiplantae; Streptophyta; Embryophyta; Tracheophyta; Spermatophyta; Magnoliophyta; eudicotyledons; core eudicotyledons; rosids; malvids; Brassicales; Brassicaceae; Camelineae; Arabidopsis`sp|O80690|BGL46_ARATH	sp|O80690|BGL46_ARATH	797	E:0	RecName: Full=Beta-glucosidase 46;^Eukaryota; Viridiplantae; Streptophyta; Embryophyta; Tracheophyta; Spermatophyta; Magnoliophyta; eudicotyledons; core eudicotyledons; rosids; malvids; Brassicales; Brassicaceae; Camelineae; Arabidopsis	PF00232.13	Glyco_hydro_1	Glycosyl hydrolase family 1	COG2723	Beta-glucosidase/6-phospho-beta-glucosidase/beta-galactosidase	.	c42466_g1|m.64707	3-1391[+]	sigP:1^32^0.569^YES	.	GO:0005975|carbohydrate metabolic process;GO:0009809|lignin biosynthetic process	GO:0043169|cation binding;GO:0047782|coniferin beta-glucosidase activity	.	K05350|bglB; beta-glucosidase [EC:3.2.1.21]	map01110|Biosynthesis of secondary metabolites;map01100|Metabolic pathways;map00940|Phenylpropanoid biosynthesis;map00460|Cyanoamino acid metabolism;map00500|Starch and sucrose metabolism
c45580_g1	4.90072	2.29299	0.000126788	0.00418581	up	yes	gi|297810584|ref|XM_002873130.1|	542	0	Arabidopsis lyrata subsp. lyrata hypothetical protein, mRNA	gi|567170468|ref|XP_006398950.1|	1126	6e-145	hypothetical protein EUTSA_v10012854mg [Eutrema salsugineum]	sp|Q9FF80|SUVH1_ARATH	421	E:5e-140	RecName: Full=Histone-lysine N-methyltransferase, H3 lysine-9 specific SUVH1;^Eukaryota; Viridiplantae; Streptophyta; Embryophyta; Tracheophyta; Spermatophyta; Magnoliophyta; eudicotyledons; core eudicotyledons; rosids; malvids; Brassicales; Brassicaceae; Camelineae; Arabidopsis	sp|Q9FF80|SUVH1_ARATH	437	E:5e-148	RecName: Full=Histone-lysine N-methyltransferase, H3 lysine-9 specific SUVH1;^Eukaryota; Viridiplantae; Streptophyta; Embryophyta; Tracheophyta; Spermatophyta; Magnoliophyta; eudicotyledons; core eudicotyledons; rosids; malvids; Brassicales; Brassicaceae; Camelineae; Arabidopsis	PF02182.12	SAD_SRA	SAD/SRA domain	COG2940	Proteins containing SET domain	.	c45580_g1|m.64746	1-867[-]	.	.	GO:0040029|regulation of gene expression, epigenetic	GO:0018024|histone-lysine N-methyltransferase activity;GO:0008270|zinc ion binding	GO:0000775|chromosome, centromeric region;GO:0005634|nucleus	K11420|EHMT; euchromatic histone-lysine N-methyltransferase [EC:2.1.1.43]	map00310|Lysine degradation
c41972_g1	0.231675	-2.10983	0.00392114	0.0380345	down	yes	gi|567122628|ref|XM_006390618.1|	588	0	Eutrema salsugineum hypothetical protein (EUTSA_v10018491mg) mRNA, complete cds	gi|674960386|emb|CDX72886.1|	1231	1e-159	BnaC06g33340D [Brassica napus]	sp|Q9C7S7|ERO1_ARATH	477	E:3e-157	RecName: Full=Endoplasmic oxidoreductin-1;^Eukaryota; Viridiplantae; Streptophyta; Embryophyta; Tracheophyta; Spermatophyta; Magnoliophyta; eudicotyledons; core eudicotyledons; rosids; malvids; Brassicales; Brassicaceae; Camelineae; Arabidopsis`sp|Q9C7S7|ERO1_ARATH	sp|Q9C7S7|ERO1_ARATH	478	E:3e-167	RecName: Full=Endoplasmic oxidoreductin-1;^Eukaryota; Viridiplantae; Streptophyta; Embryophyta; Tracheophyta; Spermatophyta; Magnoliophyta; eudicotyledons; core eudicotyledons; rosids; malvids; Brassicales; Brassicaceae; Camelineae; Arabidopsis	PF04137.10	ERO1	Endoplasmic Reticulum Oxidoreductin 1 (ERO1)	COG5061	Oxidoreductin, endoplasmic reticulum membrane-associated protein involved in disulfide bond formation	.	c41972_g1|m.65144	472-1224[-]	.	.	GO:0022900|electron transport chain	GO:0050660|flavin adenine dinucleotide binding;GO:0016671|oxidoreductase activity, acting on a sulfur group of donors, disulfide as acceptor	GO:0005783|endoplasmic reticulum;GO:0005789|endoplasmic reticulum membrane	K10976|ERO1LB; ERO1-like protein beta [EC:1.8.4.-]	map04141|Protein processing in endoplasmic reticulum
c47059_g1	9.54198	3.25429	0.00316939	0.0330573	up	yes	gi|79456825|ref|NM_116069.3|	489	0	Arabidopsis thaliana haloacid dehalogenase-like hydrolase superfamily protein mRNA, complete cds	gi|79456826|ref|NP_191763.3|	1127	2e-151	haloacid dehalogenase-like hydrolase superfamily protein [Arabidopsis thaliana]	sp|Q09893|YAI5_SCHPO	82.4	E:1e-16	RecName: Full=Uncharacterized protein C24B11.05;^Eukaryota; Fungi; Dikarya; Ascomycota; Taphrinomycotina; Schizosaccharomycetes; Schizosaccharomycetales; Schizosaccharomycetaceae; Schizosaccharomyces	sp|Q09893|YAI5_SCHPO	90.1	E:2e-20	RecName: Full=Uncharacterized protein C24B11.05;^Eukaryota; Fungi; Dikarya; Ascomycota; Taphrinomycotina; Schizosaccharomycetes; Schizosaccharomycetales; Schizosaccharomycetaceae; Schizosaccharomyces	PF13419.1	HAD_2	Haloacid dehalogenase-like hydrolase	COG1011	Predicted hydrolase (HAD superfamily)	.	c47059_g1|m.65686	291-932[-]	.	.	GO:0006206|pyrimidine nucleobase metabolic process	GO:0008252|nucleotidase activity;GO:0047405|pyrimidine-5'-nucleotide nucleosidase activity	GO:0005829|cytosol;GO:0005634|nucleus	K18551|SDT1; pyrimidine and pyridine-specific 5'-nucleotidase [EC:3.1.3.-]	map00760|Nicotinate and nicotinamide metabolism
c38827_g1	39.6291	5.30849	0.000159936	0.00483969	up	yes	gi|388491103|gb|BT133823.1|	446	0	Lotus japonicus clone JCVI-FLLj-11L23 unknown mRNA	gi|388491104|gb|AFK33618.1|	775	4e-103	unknown [Lotus japonicus]	sp|B8HUM7|NDK_CYAP4	205	E:5e-66	RecName: Full=Nucleoside diphosphate kinase;^Bacteria; Cyanobacteria; Chroococcales; Cyanothece	sp|B8HUM7|NDK_CYAP4	205	E:2e-66	RecName: Full=Nucleoside diphosphate kinase;^Bacteria; Cyanobacteria; Chroococcales; Cyanothece	PF00334.14	NDK	Nucleoside diphosphate kinase	COG0105	Nucleoside diphosphate kinase	.	c38827_g1|m.66711	77-541[-]	.	.	GO:0006241|CTP biosynthetic process;GO:0006183|GTP biosynthetic process;GO:0006228|UTP biosynthetic process	GO:0005524|ATP binding;GO:0046872|metal ion binding;GO:0004550|nucleoside diphosphate kinase activity	GO:0005737|cytoplasm	K00940|ndk, NME; nucleoside-diphosphate kinase [EC:2.7.4.6]	map01100|Metabolic pathways;map01130|Biosynthesis of antibiotics;map01110|Biosynthesis of secondary metabolites;map00240|Pyrimidine metabolism;map00230|Purine metabolism
c42499_g1	28.7973	4.84786	0.00161689	0.0213983	up	yes	gi|429240169|ref|NM_001021606.2|	101	3e-44	Schizosaccharomyces pombe 972h- 60S ribosomal protein L2 (rpl802), mRNA	gi|528893339|gb|EPZ33659.1|	989	7e-132	60S ribosomal protein L8 [Rozella allomycis CSF55]	sp|Q6PBF0|RL8_XENTR	383	E:3e-132	RecName: Full=60S ribosomal protein L8;^Eukaryota; Metazoa; Chordata; Craniata; Vertebrata; Euteleostomi; Amphibia; Batrachia; Anura; Pipoidea; Pipidae; Xenopodinae; Xenopus; Silurana	sp|Q6PBF0|RL8_XENTR	384	E:2e-133	RecName: Full=60S ribosomal protein L8;^Eukaryota; Metazoa; Chordata; Craniata; Vertebrata; Euteleostomi; Amphibia; Batrachia; Anura; Pipoidea; Pipidae; Xenopodinae; Xenopus; Silurana	PF00181.18	Ribosomal_L2	Ribosomal Proteins L2, RNA binding domain	COG0090	Ribosomal protein L2	.	c42499_g1|m.67071	131-916[-]	.	.	GO:0006412|translation	GO:0019843|rRNA binding;GO:0003735|structural constituent of ribosome	GO:0015934|large ribosomal subunit	K02938|RP-L8e, RPL8; large subunit ribosomal protein L8e	map03010|Ribosome
c46053_g3	8.78801	3.13554	0.000247941	0.00641782	up	yes	gi|567213449|ref|XM_006410820.1|	370	0	Eutrema salsugineum hypothetical protein (EUTSA_v10016314mg) mRNA, complete cds	gi|16209615|gb|AAL14120.1|	865	2e-115	phenylalanine ammonia-lyase [Brassica rapa subsp. pekinensis]	sp|P35510|PAL1_ARATH	340	E:9e-112	RecName: Full=Phenylalanine ammonia-lyase 1;^Eukaryota; Viridiplantae; Streptophyta; Embryophyta; Tracheophyta; Spermatophyta; Magnoliophyta; eudicotyledons; core eudicotyledons; rosids; malvids; Brassicales; Brassicaceae; Camelineae; Arabidopsis	sp|P35510|PAL1_ARATH	340	E:8e-112	RecName: Full=Phenylalanine ammonia-lyase 1;^Eukaryota; Viridiplantae; Streptophyta; Embryophyta; Tracheophyta; Spermatophyta; Magnoliophyta; eudicotyledons; core eudicotyledons; rosids; malvids; Brassicales; Brassicaceae; Camelineae; Arabidopsis	PF00221.14	Lyase_aromatic	Aromatic amino acid lyase	COG2986	Histidine ammonia-lyase	.	c46053_g3|m.67644	2-529[+]	.	.	GO:0009800|cinnamic acid biosynthetic process;GO:0009819|drought recovery;GO:0006559|L-phenylalanine catabolic process;GO:0046274|lignin catabolic process;GO:0009555|pollen development;GO:0080167|response to karrikin;GO:0006979|response to oxidative stress;GO:0010224|response to UV-B;GO:0046244|salicylic acid catabolic process	GO:0045548|phenylalanine ammonia-lyase activity	GO:0005737|cytoplasm	K10775|E4.3.1.24; phenylalanine ammonia-lyase [EC:4.3.1.24]	map01110|Biosynthesis of secondary metabolites;map01100|Metabolic pathways;map00940|Phenylpropanoid biosynthesis;map00360|Phenylalanine metabolism
c47176_g1	7.91208	2.98406	8.70409e-05	0.00322075	up	yes	gi|567218581|ref|XM_006412857.1|	1142	0	Eutrema salsugineum hypothetical protein (EUTSA_v10024210mg) mRNA, complete cds	gi|567218582|ref|XP_006412920.1|	2341	0	hypothetical protein EUTSA_v10024210mg [Eutrema salsugineum]	sp|P08799|MYS2_DICDI	392	E:6e-118	RecName: Full=Myosin-2 heavy chain;^Eukaryota; Amoebozoa; Mycetozoa; Dictyosteliida; Dictyostelium	sp|P08799|MYS2_DICDI	390	E:1e-119	RecName: Full=Myosin-2 heavy chain;^Eukaryota; Amoebozoa; Mycetozoa; Dictyosteliida; Dictyostelium	PF02736.14	Myosin_N	Myosin N-terminal SH3-like domain	COG5022	Myosin heavy chain	.	c47176_g1|m.68221	436-1800[+]	.	.	GO:0033275|actin-myosin filament sliding;GO:0032060|bleb assembly;GO:0006935|chemotaxis;GO:0030038|contractile actin filament bundle assembly;GO:0030866|cortical actin cytoskeleton organization;GO:0031154|culmination involved in sorocarp development;GO:0000910|cytokinesis;GO:0060328|cytoplasmic actin-based contraction involved in forward cell motility;GO:0046847|filopodium assembly;GO:0031034|myo…	GO:0051015|actin filament binding;GO:0030898|actin-dependent ATPase activity;GO:0005524|ATP binding;GO:0000146|microfilament motor activity;GO:0042803|protein homodimerization activity	GO:0042641|actomyosin;GO:0005826|actomyosin contractile ring;GO:0045179|apical cortex;GO:0032009|early phagosome;GO:0032982|myosin filament;GO:0016460|myosin II complex;GO:0001931|uropod	K10352|MYH; myosin heavy chain	map04530|Tight junction
c48759_g1	5.19719	2.37773	0.00333851	0.0342363	up	yes	gi|567131510|ref|XM_006392654.1|	461	0	Eutrema salsugineum hypothetical protein (EUTSA_v10011405mg) mRNA, complete cds	gi|567131511|ref|XP_006392716.1|	894	2e-113	hypothetical protein EUTSA_v10011405mg [Eutrema salsugineum]	sp|Q9SYG7|AL7B4_ARATH	337	E:3e-110	RecName: Full=Aldehyde dehydrogenase family 7 member B4;^Eukaryota; Viridiplantae; Streptophyta; Embryophyta; Tracheophyta; Spermatophyta; Magnoliophyta; eudicotyledons; core eudicotyledons; rosids; malvids; Brassicales; Brassicaceae; Camelineae; Arabidopsis	sp|Q9SYG7|AL7B4_ARATH	334	E:1e-111	RecName: Full=Aldehyde dehydrogenase family 7 member B4;^Eukaryota; Viridiplantae; Streptophyta; Embryophyta; Tracheophyta; Spermatophyta; Magnoliophyta; eudicotyledons; core eudicotyledons; rosids; malvids; Brassicales; Brassicaceae; Camelineae; Arabidopsis	PF00171.17	Aldedh	Aldehyde dehydrogenase family	COG1012	NAD-dependent aldehyde dehydrogenases	.	c48759_g1|m.68234	306-842[-]	.	.	GO:0006081|cellular aldehyde metabolic process;GO:0009737|response to abscisic acid stimulus;GO:0009269|response to desiccation;GO:0009651|response to salt stress	GO:0004029|aldehyde dehydrogenase (NAD) activity	GO:0005829|cytosol	K14085|ALDH7A1; aldehyde dehydrogenase family 7 member A1 [EC:1.2.1.31 1.2.1.8 1.2.1.3]	map00620|Pyruvate metabolism;map00260|Glycine, serine and threonine metabolism;map00280|Valine, leucine and isoleucine degradation;map00380|Tryptophan metabolism;map01230|Biosynthesis of amino acids;map00010|Glycolysis / Gluconeogenesis;map00071|Fatty acid degradation;map00561|Glycerolipid metabolism;map00330|Arginine and proline metabolism;map00410|beta-Alanine metabolism;map00310|Lysine degrada…
c50495_g1	4.56009	2.18906	0.00331497	0.034073	up	yes	gi|567217513|ref|XM_006412323.1|	1594	0	Eutrema salsugineum hypothetical protein (EUTSA_v10024287mg) mRNA, complete cds	gi|23193174|gb|AAN14410.1|	3728	0	bifunctional lysine-ketoglutarate reductase/saccharopine dehydrogenase [Gossypium hirsutum]	sp|Q9SMZ4|AASS_ARATH	1251	E:0	RecName: Full=Alpha-aminoadipic semialdehyde synthase;^Eukaryota; Viridiplantae; Streptophyta; Embryophyta; Tracheophyta; Spermatophyta; Magnoliophyta; eudicotyledons; core eudicotyledons; rosids; malvids; Brassicales; Brassicaceae; Camelineae; Arabidopsis`sp|Q9SMZ4|AASS_ARATH	sp|Q9SMZ4|AASS_ARATH	1320	E:0	RecName: Full=Alpha-aminoadipic semialdehyde synthase;^Eukaryota; Viridiplantae; Streptophyta; Embryophyta; Tracheophyta; Spermatophyta; Magnoliophyta; eudicotyledons; core eudicotyledons; rosids; malvids; Brassicales; Brassicaceae; Camelineae; Arabidopsis	PF05222.10	AlaDh_PNT_N	Alanine dehydrogenase/PNT, N-terminal domain	COG1748	Saccharopine dehydrogenase and related proteins	.	c50495_g1|m.68386	156-2288[+]	.	.	GO:0033512|L-lysine catabolic process to acetyl-CoA via saccharopine	GO:0000166|nucleotide binding;GO:0047131|saccharopine dehydrogenase (NAD+, L-glutamate-forming) activity;GO:0047130|saccharopine dehydrogenase (NADP+, L-lysine-forming) activity	GO:0005737|cytoplasm	K14157|AASS; alpha-aminoadipic semialdehyde synthase [EC:1.5.1.8 1.5.1.9]	map00310|Lysine degradation;map01100|Metabolic pathways;map01110|Biosynthesis of secondary metabolites;map01130|Biosynthesis of antibiotics
c50495_g1	4.56009	2.18906	0.00331497	0.034073	up	yes	gi|567217513|ref|XM_006412323.1|	1594	0	Eutrema salsugineum hypothetical protein (EUTSA_v10024287mg) mRNA, complete cds	gi|23193174|gb|AAN14410.1|	3728	0	bifunctional lysine-ketoglutarate reductase/saccharopine dehydrogenase [Gossypium hirsutum]	sp|Q9SMZ4|AASS_ARATH	1251	E:0	RecName: Full=Alpha-aminoadipic semialdehyde synthase;^Eukaryota; Viridiplantae; Streptophyta; Embryophyta; Tracheophyta; Spermatophyta; Magnoliophyta; eudicotyledons; core eudicotyledons; rosids; malvids; Brassicales; Brassicaceae; Camelineae; Arabidopsis`sp|Q9SMZ4|AASS_ARATH	sp|Q9SMZ4|AASS_ARATH	631	E:0	RecName: Full=Alpha-aminoadipic semialdehyde synthase;^Eukaryota; Viridiplantae; Streptophyta; Embryophyta; Tracheophyta; Spermatophyta; Magnoliophyta; eudicotyledons; core eudicotyledons; rosids; malvids; Brassicales; Brassicaceae; Camelineae; Arabidopsis	PF03435.13	Saccharop_dh	Saccharopine dehydrogenase	COG1748	Saccharopine dehydrogenase and related proteins	.	c50495_g1|m.68387	2472-3479[+]	.	.	GO:0033512|L-lysine catabolic process to acetyl-CoA via saccharopine	GO:0000166|nucleotide binding;GO:0047131|saccharopine dehydrogenase (NAD+, L-glutamate-forming) activity;GO:0047130|saccharopine dehydrogenase (NADP+, L-lysine-forming) activity	GO:0005737|cytoplasm	K14157|AASS; alpha-aminoadipic semialdehyde synthase [EC:1.5.1.8 1.5.1.9]	map00310|Lysine degradation;map01100|Metabolic pathways;map01110|Biosynthesis of secondary metabolites;map01130|Biosynthesis of antibiotics
c49072_g2	8.12708	3.02274	2.98177e-05	0.00149724	up	yes	gi|567166671|ref|XM_006397828.1|	517	0	Eutrema salsugineum hypothetical protein (EUTSA_v10001285mg) mRNA, complete cds	gi|567166672|ref|XP_006397891.1|	1081	6e-135	hypothetical protein EUTSA_v10001285mg [Eutrema salsugineum]	sp|O80725|AB4B_ARATH	414	E:1e-133	RecName: Full=ABC transporter B family member 4;^Eukaryota; Viridiplantae; Streptophyta; Embryophyta; Tracheophyta; Spermatophyta; Magnoliophyta; eudicotyledons; core eudicotyledons; rosids; malvids; Brassicales; Brassicaceae; Camelineae; Arabidopsis`sp|O80725|AB4B_ARATH	sp|O80725|AB4B_ARATH	469	E:8e-155	RecName: Full=ABC transporter B family member 4;^Eukaryota; Viridiplantae; Streptophyta; Embryophyta; Tracheophyta; Spermatophyta; Magnoliophyta; eudicotyledons; core eudicotyledons; rosids; malvids; Brassicales; Brassicaceae; Camelineae; Arabidopsis`sp|O80725|AB4B_ARATH	PF00005.22	ABC_tran	ABC transporter	COG1132	ABC-type multidrug transport system, ATPase and permease components	.	c49072_g2|m.68696	3-752[+]	.	.	GO:0010315|auxin efflux;GO:0010540|basipetal auxin transport;GO:0009630|gravitropism;GO:0009735|response to cytokinin stimulus;GO:0048767|root hair elongation	GO:0005524|ATP binding;GO:0008559|xenobiotic-transporting ATPase activity	GO:0016021|integral to membrane;GO:0005886|plasma membrane;GO:0009506|plasmodesma	K05658|ABCB1; ATP-binding cassette, subfamily B (MDR/TAP), member 1 [EC:3.6.3.44]	map02010|ABC transporters;map05206|MicroRNAs in cancer;map04976|Bile secretion
c40538_g1	5.73589	2.52002	0.00576106	0.0491383	up	yes	gi|297851761|ref|XM_002893716.1|	378	0	Arabidopsis lyrata subsp. lyrata predicted protein, mRNA	gi|297851762|ref|XP_002893762.1|	839	8e-111	predicted protein [Arabidopsis lyrata subsp. lyrata]	sp|Q38806|HSP22_ARATH	262	E:3e-86	RecName: Full=22.0 kDa heat shock protein;^Eukaryota; Viridiplantae; Streptophyta; Embryophyta; Tracheophyta; Spermatophyta; Magnoliophyta; eudicotyledons; core eudicotyledons; rosids; malvids; Brassicales; Brassicaceae; Camelineae; Arabidopsis	sp|Q38806|HSP22_ARATH	284	E:3e-96	RecName: Full=22.0 kDa heat shock protein;^Eukaryota; Viridiplantae; Streptophyta; Embryophyta; Tracheophyta; Spermatophyta; Magnoliophyta; eudicotyledons; core eudicotyledons; rosids; malvids; Brassicales; Brassicaceae; Camelineae; Arabidopsis	PF04969.11	CS	CS domain	COG0071	Molecular chaperone (small heat shock protein)	.	c40538_g1|m.68706	91-666[+]	sigP:1^26^0.709^YES	.	GO:0009408|response to heat	.	GO:0005783|endoplasmic reticulum	K13993|HSP20; HSP20 family protein	map04141|Protein processing in endoplasmic reticulum
c40498_g1	0.16444	-2.60437	0.00038864	0.00863566	down	yes	gi|567122908|ref|XM_006390694.1|	710	0	Eutrema salsugineum hypothetical protein (EUTSA_v10018753mg) mRNA, complete cds	gi|312281679|dbj|BAJ33705.1|	1703	0	unnamed protein product [Thellungiella halophila]	sp|Q96520|PER12_ARATH	627	E:0	RecName: Full=Peroxidase 12;^Eukaryota; Viridiplantae; Streptophyta; Embryophyta; Tracheophyta; Spermatophyta; Magnoliophyta; eudicotyledons; core eudicotyledons; rosids; malvids; Brassicales; Brassicaceae; Camelineae; Arabidopsis	sp|Q96520|PER12_ARATH	649	E:0	RecName: Full=Peroxidase 12;^Eukaryota; Viridiplantae; Streptophyta; Embryophyta; Tracheophyta; Spermatophyta; Magnoliophyta; eudicotyledons; core eudicotyledons; rosids; malvids; Brassicales; Brassicaceae; Camelineae; Arabidopsis	PF00141.18	peroxidase	Peroxidase	.	.	.	c40498_g1|m.69090	104-1195[-]	sigP:1^31^0.88^YES	ExpAA=21.19^PredHel=1^Topology=i7-29o	GO:0042744|hydrogen peroxide catabolic process	GO:0020037|heme binding;GO:0046872|metal ion binding;GO:0004601|peroxidase activity	GO:0005576|extracellular region;GO:0016020|membrane;GO:0009505|plant-type cell wall;GO:0009506|plasmodesma;GO:0005773|vacuole	K00430|E1.11.1.7; peroxidase [EC:1.11.1.7]	map01100|Metabolic pathways;map00940|Phenylpropanoid biosynthesis;map01110|Biosynthesis of secondary metabolites
c34884_g1	4.53457	2.18097	0.000281119	0.00698793	up	yes	gi|567138948|ref|XM_006394580.1|	269	4e-138	Eutrema salsugineum hypothetical protein (EUTSA_v10004208mg) mRNA, complete cds	gi|728842512|gb|KHG21955.1|	536	2e-66	Tubulin beta-8 chain -like protein [Gossypium arboreum]	sp|P29516|TBB8_ARATH	214	E:1e-66	RecName: Full=Tubulin beta-8 chain;^Eukaryota; Viridiplantae; Streptophyta; Embryophyta; Tracheophyta; Spermatophyta; Magnoliophyta; eudicotyledons; core eudicotyledons; rosids; malvids; Brassicales; Brassicaceae; Camelineae; Arabidopsis	sp|P29516|TBB8_ARATH	214	E:3e-67	RecName: Full=Tubulin beta-8 chain;^Eukaryota; Viridiplantae; Streptophyta; Embryophyta; Tracheophyta; Spermatophyta; Magnoliophyta; eudicotyledons; core eudicotyledons; rosids; malvids; Brassicales; Brassicaceae; Camelineae; Arabidopsis	PF10644.4	Misat_Tub_SegII	Misato Segment II tubulin-like domain	COG5023	Tubulin	.	c34884_g1|m.70005	1-300[-]	.	.	GO:0007018|microtubule-based movement;GO:0007017|microtubule-based process;GO:0051258|protein polymerization;GO:0009651|response to salt stress	GO:0005525|GTP binding;GO:0003924|GTPase activity;GO:0005200|structural constituent of cytoskeleton	GO:0005794|Golgi apparatus;GO:0016020|membrane;GO:0005874|microtubule;GO:0045298|tubulin complex	K07375|TUBB; tubulin beta	map05130|Pathogenic Escherichia coli infection;map04145|Phagosome;map04540|Gap junction
c51156_g1	7.27751	2.86345	0.000119699	0.0040094	up	yes	gi|567136270|ref|XM_006393846.1|	3338	0	Eutrema salsugineum hypothetical protein (EUTSA_v10003515mg) mRNA, complete cds	gi|727542619|ref|XP_010444693.1|	7019	0	PREDICTED: DNA polymerase alpha catalytic subunit-like [Camelina sativa]	sp|Q9FHA3|DPOLA_ARATH	2670	E:0	RecName: Full=DNA polymerase alpha catalytic subunit;^Eukaryota; Viridiplantae; Streptophyta; Embryophyta; Tracheophyta; Spermatophyta; Magnoliophyta; eudicotyledons; core eudicotyledons; rosids; malvids; Brassicales; Brassicaceae; Camelineae; Arabidopsis	sp|Q9FHA3|DPOLA_ARATH	2776	E:0	RecName: Full=DNA polymerase alpha catalytic subunit;^Eukaryota; Viridiplantae; Streptophyta; Embryophyta; Tracheophyta; Spermatophyta; Magnoliophyta; eudicotyledons; core eudicotyledons; rosids; malvids; Brassicales; Brassicaceae; Camelineae; Arabidopsis	PF12254.3	DNA_pol_alpha_N	DNA polymerase alpha subunit p180 N terminal	COG0417	DNA polymerase elongation subunit (family B)	.	c51156_g1|m.70591	180-4784[-]	.	.	GO:0006260|DNA replication	GO:0051539|4 iron, 4 sulfur cluster binding;GO:0003677|DNA binding;GO:0003887|DNA-directed DNA polymerase activity;GO:0046872|metal ion binding;GO:0001882|nucleoside binding;GO:0000166|nucleotide binding	GO:0005634|nucleus	K02320|POLA1; DNA polymerase alpha subunit A [EC:2.7.7.7]	map03030|DNA replication;map01100|Metabolic pathways;map00240|Pyrimidine metabolism;map00230|Purine metabolism
c49009_g3	51.7993	5.69486	2.88285e-05	0.00146088	up	yes	gi|332640072|gb|CP002686.1|	218	1e-109	Arabidopsis thaliana chromosome 3, complete sequence	gi|297834080|ref|XP_002884922.1|	669	6e-85	hypothetical protein ARALYDRAFT_897482 [Arabidopsis lyrata subsp. lyrata]	sp|Q8LPH6|MYB86_ARATH	192	E:3e-58	RecName: Full=Transcription factor MYB86;^Eukaryota; Viridiplantae; Streptophyta; Embryophyta; Tracheophyta; Spermatophyta; Magnoliophyta; eudicotyledons; core eudicotyledons; rosids; malvids; Brassicales; Brassicaceae; Camelineae; Arabidopsis	sp|Q8LPH6|MYB86_ARATH	192	E:3e-58	RecName: Full=Transcription factor MYB86;^Eukaryota; Viridiplantae; Streptophyta; Embryophyta; Tracheophyta; Spermatophyta; Magnoliophyta; eudicotyledons; core eudicotyledons; rosids; malvids; Brassicales; Brassicaceae; Camelineae; Arabidopsis	PF00249.26	Myb_DNA-binding	Myb-like DNA-binding domain	COG5147	Myb superfamily proteins, including transcription factors and mRNA splicing factors	.	c49009_g3|m.71525	2-544[+]	.	ExpAA=17.96^PredHel=1^Topology=o44-66i	GO:0006355|regulation of transcription, DNA-dependent;GO:0006351|transcription, DNA-dependent	GO:0003682|chromatin binding;GO:0003677|DNA binding	GO:0005634|nucleus	K09422|MYBP; myb proto-oncogene protein, plant	.
c51243_g1	5.35874	2.42189	0.00091987	0.0149165	up	yes	gi|297820225|ref|XM_002877950.1|	1504	0	Arabidopsis lyrata subsp. lyrata hypothetical protein, mRNA	gi|567186519|ref|XP_006403544.1|	2916	0	hypothetical protein EUTSA_v10010161mg [Eutrema salsugineum]	sp|Q9M1S8|GCP2_ARATH	1125	E:0	RecName: Full=Probable glutamate carboxypeptidase 2;^Eukaryota; Viridiplantae; Streptophyta; Embryophyta; Tracheophyta; Spermatophyta; Magnoliophyta; eudicotyledons; core eudicotyledons; rosids; malvids; Brassicales; Brassicaceae; Camelineae; Arabidopsis	sp|Q9M1S8|GCP2_ARATH	1291	E:0	RecName: Full=Probable glutamate carboxypeptidase 2;^Eukaryota; Viridiplantae; Streptophyta; Embryophyta; Tracheophyta; Spermatophyta; Magnoliophyta; eudicotyledons; core eudicotyledons; rosids; malvids; Brassicales; Brassicaceae; Camelineae; Arabidopsis	PF04389.12	Peptidase_M28	Peptidase family M28	NOG74799	Carboxypeptidase	.	c51243_g1|m.72081	199-2325[-]	.	ExpAA=20.30^PredHel=1^Topology=i21-43o	GO:0009790|embryo development;GO:0009908|flower development;GO:0010305|leaf vascular tissue pattern formation;GO:0009640|photomorphogenesis;GO:0006508|proteolysis;GO:0010080|regulation of floral meristem growth;GO:0010081|regulation of inflorescence meristem growth;GO:0010082|regulation of root meristem growth	GO:0046872|metal ion binding;GO:0004181|metallocarboxypeptidase activity	GO:0016021|integral to membrane	K01301|NAALAD; N-acetylated-alpha-linked acidic dipeptidase [EC:3.4.17.21]	.
c48912_g2	2.03244	1.02321	0.00452152	0.0418974	up	yes	gi|297809836|ref|XM_002872756.1|	313	2e-162	Arabidopsis lyrata subsp. lyrata hypothetical protein, mRNA	gi|15236229|ref|NP_192207.1|	562	2e-70	auxin-binding protein 1 [Arabidopsis thaliana]	sp|P33487|ABP1_ARATH	221	E:1e-71	RecName: Full=Auxin-binding protein 1;^Eukaryota; Viridiplantae; Streptophyta; Embryophyta; Tracheophyta; Spermatophyta; Magnoliophyta; eudicotyledons; core eudicotyledons; rosids; malvids; Brassicales; Brassicaceae; Camelineae; Arabidopsis	sp|P33487|ABP1_ARATH	265	E:1e-89	RecName: Full=Auxin-binding protein 1;^Eukaryota; Viridiplantae; Streptophyta; Embryophyta; Tracheophyta; Spermatophyta; Magnoliophyta; eudicotyledons; core eudicotyledons; rosids; malvids; Brassicales; Brassicaceae; Camelineae; Arabidopsis	PF02041.11	Auxin_BP	Auxin binding protein	NOG123185	Auxin binding protein	.	c48912_g2|m.154	77-484[+]	sigP:1^33^0.756^YES	.	GO:0009734|auxin mediated signaling pathway;GO:0000910|cytokinesis;GO:0051781|positive regulation of cell division;GO:0045793|positive regulation of cell size;GO:0032877|positive regulation of DNA endoreduplication;GO:0009826|unidimensional cell growth	GO:0010011|auxin binding;GO:0046872|metal ion binding;GO:0004872|receptor activity;GO:0008270|zinc ion binding	GO:0005788|endoplasmic reticulum lumen	.	.
c50906_g3	25.8814	4.69385	0.000524461	0.0104163	up	yes	gi|567165723|ref|XM_006397558.1|	1146	0	Eutrema salsugineum hypothetical protein (EUTSA_v10001726mg) mRNA, complete cds	gi|297824461|ref|XP_002880113.1|	2680	0	predicted protein [Arabidopsis lyrata subsp. lyrata]	sp|Q9M1D1|BGL27_ARATH	939	E:0	RecName: Full=Beta-glucosidase 27;^Eukaryota; Viridiplantae; Streptophyta; Embryophyta; Tracheophyta; Spermatophyta; Magnoliophyta; eudicotyledons; core eudicotyledons; rosids; malvids; Brassicales; Brassicaceae; Camelineae; Arabidopsis	sp|Q9M1D1|BGL27_ARATH	939	E:0	RecName: Full=Beta-glucosidase 27;^Eukaryota; Viridiplantae; Streptophyta; Embryophyta; Tracheophyta; Spermatophyta; Magnoliophyta; eudicotyledons; core eudicotyledons; rosids; malvids; Brassicales; Brassicaceae; Camelineae; Arabidopsis	PF00232.13	Glyco_hydro_1	Glycosyl hydrolase family 1	COG2723	Beta-glucosidase/6-phospho-beta-glucosidase/beta-galactosidase	.	c50906_g3|m.1076	101-1720[+]	.	.	GO:0005975|carbohydrate metabolic process	GO:0008422|beta-glucosidase activity;GO:0043169|cation binding	.	K01188|E3.2.1.21; beta-glucosidase [EC:3.2.1.21]	map01110|Biosynthesis of secondary metabolites;map01100|Metabolic pathways;map00940|Phenylpropanoid biosynthesis;map00460|Cyanoamino acid metabolism;map00500|Starch and sucrose metabolism
c43856_g1	6.05091	2.59715	0.00167931	0.0218986	up	yes	gi|297815597|ref|XM_002875636.1|	1477	0	Arabidopsis lyrata subsp. lyrata hypothetical protein, mRNA	gi|30692267|ref|NP_190059.3|	3315	0	kinesin-like protein 1 [Arabidopsis thaliana]	sp|O81635|ATK4_ARATH	527	E:3e-165	RecName: Full=Kinesin-4;^Eukaryota; Viridiplantae; Streptophyta; Embryophyta; Tracheophyta; Spermatophyta; Magnoliophyta; eudicotyledons; core eudicotyledons; rosids; malvids; Brassicales; Brassicaceae; Camelineae; Arabidopsis`sp|O81635|ATK4_ARATH	sp|O81635|ATK4_ARATH	177	E:3e-47	RecName: Full=Kinesin-4;^Eukaryota; Viridiplantae; Streptophyta; Embryophyta; Tracheophyta; Spermatophyta; Magnoliophyta; eudicotyledons; core eudicotyledons; rosids; malvids; Brassicales; Brassicaceae; Camelineae; Arabidopsis	PF00307.26	CH	Calponin homology (CH) domain	COG5059	Kinesin-like protein	.	c43856_g1|m.1352	331-1530[+]	.	.	GO:0007018|microtubule-based movement	GO:0005524|ATP binding;GO:0016887|ATPase activity;GO:0008017|microtubule binding;GO:0003777|microtubule motor activity	GO:0005737|cytoplasm;GO:0005874|microtubule;GO:0005875|microtubule associated complex	K10406|KIFC2_3; kinesin family member C2/C3	.
c43856_g1	6.05091	2.59715	0.00167931	0.0218986	up	yes	gi|297815597|ref|XM_002875636.1|	1477	0	Arabidopsis lyrata subsp. lyrata hypothetical protein, mRNA	gi|30692267|ref|NP_190059.3|	3315	0	kinesin-like protein 1 [Arabidopsis thaliana]	sp|O81635|ATK4_ARATH	527	E:3e-165	RecName: Full=Kinesin-4;^Eukaryota; Viridiplantae; Streptophyta; Embryophyta; Tracheophyta; Spermatophyta; Magnoliophyta; eudicotyledons; core eudicotyledons; rosids; malvids; Brassicales; Brassicaceae; Camelineae; Arabidopsis`sp|O81635|ATK4_ARATH	sp|O81635|ATK4_ARATH	532	E:5e-174	RecName: Full=Kinesin-4;^Eukaryota; Viridiplantae; Streptophyta; Embryophyta; Tracheophyta; Spermatophyta; Magnoliophyta; eudicotyledons; core eudicotyledons; rosids; malvids; Brassicales; Brassicaceae; Camelineae; Arabidopsis	PF00225.18	Kinesin	Kinesin motor domain	COG5059	Kinesin-like protein	.	c43856_g1|m.1351	1589-3820[+]	.	.	GO:0007018|microtubule-based movement	GO:0005524|ATP binding;GO:0016887|ATPase activity;GO:0008017|microtubule binding;GO:0003777|microtubule motor activity	GO:0005737|cytoplasm;GO:0005874|microtubule;GO:0005875|microtubule associated complex	K10406|KIFC2_3; kinesin family member C2/C3	.
c47417_g1	4.51156	2.17363	0.00538861	0.047248	up	yes	gi|42569213|ref|NM_127702.3|	299	2e-154	Arabidopsis thaliana ATP binding microtubule motor family protein mRNA, complete cds	gi|4567265|gb|AAD23678.1|	614	7e-73	putative kinesin heavy chain [Arabidopsis thaliana]	sp|Q02224|CENPE_HUMAN	70.5	E:1e-12	RecName: Full=Centromere-associated protein E;^Eukaryota; Metazoa; Chordata; Craniata; Vertebrata; Euteleostomi; Mammalia; Eutheria; Euarchontoglires; Primates; Haplorrhini; Catarrhini; Hominidae; Homo	sp|Q61768|KINH_MOUSE	72.4	E:5e-14	RecName: Full=Kinesin-1 heavy chain;^Eukaryota; Metazoa; Chordata; Craniata; Vertebrata; Euteleostomi; Mammalia; Eutheria; Euarchontoglires; Glires; Rodentia; Sciurognathi; Muroidea; Muridae; Murinae; Mus; Mus	PF00225.18	Kinesin	Kinesin motor domain	COG5059	Kinesin-like protein	.	c47417_g1|m.1377	295-654[+]	.	.	GO:0007028|cytoplasm organization;GO:0006839|mitochondrial transport;GO:0035617|stress granule disassembly;GO:0047496|vesicle transport along microtubule	GO:0005524|ATP binding;GO:0008017|microtubule binding;GO:0003777|microtubule motor activity	GO:0035253|ciliary rootlet;GO:0005829|cytosol;GO:0005871|kinesin complex;GO:0005874|microtubule;GO:0043005|neuron projection;GO:0048471|perinuclear region of cytoplasm;GO:0031982|vesicle	K11498|CENPE; centromeric protein E	.
c39764_g1	2.41819	1.27393	5.334e-05	0.00228682	up	yes	gi|567199431|ref|XM_006407069.1|	1461	0	Eutrema salsugineum hypothetical protein (EUTSA_v10022348mg) mRNA, partial cds	gi|685311714|ref|XP_009146419.1|	3574	0	PREDICTED: subtilisin-like protease [Brassica rapa]	sp|O65351|SUBL_ARATH	778	E:0	RecName: Full=Subtilisin-like protease;^Eukaryota; Viridiplantae; Streptophyta; Embryophyta; Tracheophyta; Spermatophyta; Magnoliophyta; eudicotyledons; core eudicotyledons; rosids; malvids; Brassicales; Brassicaceae; Camelineae; Arabidopsis	sp|O65351|SUBL_ARATH	799	E:0	RecName: Full=Subtilisin-like protease;^Eukaryota; Viridiplantae; Streptophyta; Embryophyta; Tracheophyta; Spermatophyta; Magnoliophyta; eudicotyledons; core eudicotyledons; rosids; malvids; Brassicales; Brassicaceae; Camelineae; Arabidopsis	PF05922.11	Inhibitor_I9	Peptidase inhibitor I9	COG1404	Subtilisin-like serine proteases	.	c39764_g1|m.1730	244-2778[+]	sigP:1^19^0.883^YES	.	GO:0080001|mucilage extrusion from seed coat;GO:0048359|mucilage metabolic process involved seed coat development;GO:0043086|negative regulation of catalytic activity;GO:0006508|proteolysis	GO:0004252|serine-type endopeptidase activity	GO:0048046|apoplast;GO:0009505|plant-type cell wall	.	.
c31773_g1	5.46579	2.45043	0.00427928	0.0402617	up	yes	gi|297795350|ref|XM_002865514.1|	183	6e-90	Arabidopsis lyrata subsp. lyrata zinc finger family protein, mRNA	gi|15238323|ref|NP_199035.1|	628	7e-79	E3 ubiquitin-protein ligase ATL23 [Arabidopsis thaliana]	sp|Q8L9W3|ATL23_ARATH	246	E:4e-80	RecName: Full=E3 ubiquitin-protein ligase ATL23;^Eukaryota; Viridiplantae; Streptophyta; Embryophyta; Tracheophyta; Spermatophyta; Magnoliophyta; eudicotyledons; core eudicotyledons; rosids; malvids; Brassicales; Brassicaceae; Camelineae; Arabidopsis	sp|Q8L9W3|ATL23_ARATH	246	E:3e-82	RecName: Full=E3 ubiquitin-protein ligase ATL23;^Eukaryota; Viridiplantae; Streptophyta; Embryophyta; Tracheophyta; Spermatophyta; Magnoliophyta; eudicotyledons; core eudicotyledons; rosids; malvids; Brassicales; Brassicaceae; Camelineae; Arabidopsis	PF12861.2	zf-Apc11	Anaphase-promoting complex subunit 11 RING-H2 finger	NOG261446	RNA binding motif protein 14	.	c31773_g1|m.2537	167-649[-]	.	ExpAA=22.97^PredHel=1^Topology=o33-55i	.	GO:0046872|metal ion binding;GO:0004842|ubiquitin-protein ligase activity;GO:0008270|zinc ion binding	GO:0016021|integral to membrane	K19037|ATL23; E3 ubiquitin-protein ligase ATL23 [EC:2.3.2.27]	.
c44422_g1	10.3279	3.36848	0.000377656	0.00846247	up	yes	gi|297830555|ref|XM_002883114.1|	5688	0	Arabidopsis lyrata subsp. lyrata hypothetical protein, mRNA	gi|297830556|ref|XP_002883160.1|	11575	0	hypothetical protein ARALYDRAFT_479423 [Arabidopsis lyrata subsp. lyrata]	sp|Q9GYZ0|KIF15_STRPU	416	E:2e-117	RecName: Full=Kinesin-like protein KIF15;^Eukaryota; Metazoa; Echinodermata; Eleutherozoa; Echinozoa; Echinoidea; Euechinoidea; Echinacea; Echinoida; Strongylocentrotidae; Strongylocentrotus	sp|Q9GYZ0|KIF15_STRPU	422	E:2e-119	RecName: Full=Kinesin-like protein KIF15;^Eukaryota; Metazoa; Echinodermata; Eleutherozoa; Echinozoa; Echinoidea; Euechinoidea; Echinacea; Echinoida; Strongylocentrotidae; Strongylocentrotus	PF00225.18	Kinesin	Kinesin motor domain	COG5059	Kinesin-like protein	.	c44422_g1|m.2706	83-8416[+]	.	.	GO:0007018|microtubule-based movement	GO:0005524|ATP binding;GO:0003777|microtubule motor activity	GO:0005737|cytoplasm;GO:0005874|microtubule;GO:0005875|microtubule associated complex;GO:0005819|spindle	K10400|KIF15; kinesin family member 15	.
c45059_g2	9.47859	3.24467	2.2737e-05	0.0012461	up	yes	gi|567207033|ref|XM_006409126.1|	323	9e-168	Eutrema salsugineum hypothetical protein (EUTSA_v100228211mg) mRNA, partial cds	gi|567207034|ref|XP_006409189.1|	647	4e-82	hypothetical protein EUTSA_v100228211mg, partial [Eutrema salsugineum]	sp|Q39027|MPK7_ARATH	253	E:6e-80	RecName: Full=Mitogen-activated protein kinase 7;^Eukaryota; Viridiplantae; Streptophyta; Embryophyta; Tracheophyta; Spermatophyta; Magnoliophyta; eudicotyledons; core eudicotyledons; rosids; malvids; Brassicales; Brassicaceae; Camelineae; Arabidopsis	sp|Q39027|MPK7_ARATH	252	E:2e-82	RecName: Full=Mitogen-activated protein kinase 7;^Eukaryota; Viridiplantae; Streptophyta; Embryophyta; Tracheophyta; Spermatophyta; Magnoliophyta; eudicotyledons; core eudicotyledons; rosids; malvids; Brassicales; Brassicaceae; Camelineae; Arabidopsis	PF00069.20	Pkinase	Protein kinase domain	COG0515	Serine/threonine protein kinase	.	c45059_g2|m.2868	489-854[+]	.	.	GO:0042542|response to hydrogen peroxide	GO:0005524|ATP binding;GO:0004707|MAP kinase activity	.	K04371|MAPK1_3; mitogen-activated protein kinase 1/3 [EC:2.7.11.24]	map04915|Estrogen signaling pathway;map04071|Sphingolipid signaling pathway;map04013|MAPK signaling pathway - fly;map04620|Toll-like receptor signaling pathway;map04621|NOD-like receptor signaling pathway;map04150|mTOR signaling pathway;map04151|PI3K-Akt signaling pathway;map05205|Proteoglycans in cancer;map04360|Axon guidance;map05145|Toxoplasmosis;map04320|Dorso-ventral axis formation;map05200|…
c48348_g3	4.37433	2.12906	0.00294659	0.0317547	up	yes	gi|226235028|dbj|AB438992.1|	830	0	Cardamine nipponica PHYE gene for phytochrome E, complete cds, haplotype: 10	gi|297800250|ref|XP_002868009.1|	1847	0	hypothetical protein ARALYDRAFT_914880 [Arabidopsis lyrata subsp. lyrata]	sp|P42498|PHYE_ARATH	691	E:0	RecName: Full=Phytochrome E;^Eukaryota; Viridiplantae; Streptophyta; Embryophyta; Tracheophyta; Spermatophyta; Magnoliophyta; eudicotyledons; core eudicotyledons; rosids; malvids; Brassicales; Brassicaceae; Camelineae; Arabidopsis	sp|P42498|PHYE_ARATH	689	E:0	RecName: Full=Phytochrome E;^Eukaryota; Viridiplantae; Streptophyta; Embryophyta; Tracheophyta; Spermatophyta; Magnoliophyta; eudicotyledons; core eudicotyledons; rosids; malvids; Brassicales; Brassicaceae; Camelineae; Arabidopsis	PF08446.6	PAS_2	PAS fold	COG0642	Signal transduction histidine kinase	.	c48348_g3|m.3191	3-1118[-]	.	.	GO:0000160|phosphorelay signal transduction system;GO:0018298|protein-chromophore linkage;GO:0017006|protein-tetrapyrrole linkage;GO:0009585|red, far-red light phototransduction;GO:0006355|regulation of transcription, DNA-dependent;GO:0023014|signal transduction by phosphorylation;GO:0006351|transcription, DNA-dependent	GO:0005524|ATP binding;GO:0008020|G-protein coupled photoreceptor activity;GO:0000155|phosphorelay sensor kinase activity	GO:0016020|membrane	K12123|PHYE; phytochrome E	.
c23159_g1	0.11988	-3.06034	0.00013998	0.00445275	down	yes	gi|332189094|gb|CP002684.1|	279	2e-143	Arabidopsis thaliana chromosome 1 sequence	gi|674251721|gb|KFK44486.1|	419	6e-49	hypothetical protein AALP_AA1G263000 [Arabis alpina]	sp|Q9SN27|ATL59_ARATH	48.9	E:7e-06	RecName: Full=E3 ubiquitin-protein ligase ATL59;^Eukaryota; Viridiplantae; Streptophyta; Embryophyta; Tracheophyta; Spermatophyta; Magnoliophyta; eudicotyledons; core eudicotyledons; rosids; malvids; Brassicales; Brassicaceae; Camelineae; Arabidopsis	sp|Q9LM69|ATL80_ARATH	59.3	E:2e-10	RecName: Full=RING-H2 finger protein ATL80;^Eukaryota; Viridiplantae; Streptophyta; Embryophyta; Tracheophyta; Spermatophyta; Magnoliophyta; eudicotyledons; core eudicotyledons; rosids; malvids; Brassicales; Brassicaceae; Camelineae; Arabidopsis	PF13639.1	zf-RING_2	Ring finger domain	COG5540	RING-finger-containing ubiquitin ligase	.	c23159_g1|m.3296	167-574[-]	.	.	GO:0006952|defense response;GO:0016567|protein ubiquitination;GO:0010200|response to chitin	GO:0046872|metal ion binding;GO:0008270|zinc ion binding	GO:0016021|integral to membrane	K19039|ATL7_58_59; E3 ubiquitin-protein ligase ATL7/58/59 [EC:2.3.2.27]	.
c48118_g3	8.80737	3.13871	0.0033986	0.0346356	up	yes	gi|567119169|ref|XM_006389724.1|	281	2e-144	Eutrema salsugineum hypothetical protein (EUTSA_v10018503mg) mRNA, complete cds	gi|567119170|ref|XP_006389786.1|	646	2e-77	hypothetical protein EUTSA_v10018503mg [Eutrema salsugineum]	sp|Q9C968|CCA24_ARATH	243	E:5e-75	RecName: Full=Cyclin-A2-4;^Eukaryota; Viridiplantae; Streptophyta; Embryophyta; Tracheophyta; Spermatophyta; Magnoliophyta; eudicotyledons; core eudicotyledons; rosids; malvids; Brassicales; Brassicaceae; Camelineae; Arabidopsis	sp|Q38819|CCA23_ARATH	236	E:5e-75	RecName: Full=Cyclin-A2-3;^Eukaryota; Viridiplantae; Streptophyta; Embryophyta; Tracheophyta; Spermatophyta; Magnoliophyta; eudicotyledons; core eudicotyledons; rosids; malvids; Brassicales; Brassicaceae; Camelineae; Arabidopsis	PF02984.14	Cyclin_C	Cyclin, C-terminal domain	COG5024	Cyclin	.	c48118_g3|m.4662	534-926[-]	.	.	GO:0051301|cell division;GO:0008283|cell proliferation;GO:0042023|DNA endoreduplication;GO:0010311|lateral root formation;GO:2000123|positive regulation of stomatal complex development;GO:0000079|regulation of cyclin-dependent protein kinase activity;GO:0010389|regulation of G2/M transition of mitotic cell cycle	.	GO:0005634|nucleus	K06627|CCNA; cyclin A	map04152|AMPK signaling pathway;map05203|Viral carcinogenesis;map04110|Cell cycle;map05161|Hepatitis B;map05169|Epstein-Barr virus infection;map04914|Progesterone-mediated oocyte maturation
c38485_g2	0.203016	-2.30033	0.000466821	0.00968311	down	yes	gi|42568559|ref|NM_124954.2|	272	3e-139	Arabidopsis thaliana probable pectate lyase 21 mRNA, complete cds	gi|685271866|ref|XP_009126984.1|	616	5e-73	PREDICTED: putative pectate lyase 21 [Brassica rapa]	sp|Q9FM66|PLY21_ARATH	233	E:8e-71	RecName: Full=Putative pectate lyase 21;^Eukaryota; Viridiplantae; Streptophyta; Embryophyta; Tracheophyta; Spermatophyta; Magnoliophyta; eudicotyledons; core eudicotyledons; rosids; malvids; Brassicales; Brassicaceae; Camelineae; Arabidopsis`sp|Q9FM66|PLY21_ARATH	sp|Q9FM66|PLY21_ARATH	233	E:2e-74	RecName: Full=Putative pectate lyase 21;^Eukaryota; Viridiplantae; Streptophyta; Embryophyta; Tracheophyta; Spermatophyta; Magnoliophyta; eudicotyledons; core eudicotyledons; rosids; malvids; Brassicales; Brassicaceae; Camelineae; Arabidopsis	PF00544.14	Pec_lyase_C	Pectate lyase	COG3866	Pectate lyase	.	c38485_g2|m.4689	315-707[+]	.	.	GO:0045490|pectin catabolic process	GO:0046872|metal ion binding;GO:0030570|pectate lyase activity	.	K01728|pel; pectate lyase [EC:4.2.2.2]	map00040|Pentose and glucuronate interconversions
c45077_g1	25.1529	4.65265	7.85385e-08	2.0047e-05	up	yes	gi|567170630|ref|XM_006398933.1|	402	0	Eutrema salsugineum hypothetical protein (EUTSA_v10014105mg) mRNA, complete cds	gi|674963926|emb|CDX70158.1|	1476	0	BnaA10g25070D [Brassica napus]	sp|Q9FLC0|PER52_ARATH	540	E:0	RecName: Full=Peroxidase 52;^Eukaryota; Viridiplantae; Streptophyta; Embryophyta; Tracheophyta; Spermatophyta; Magnoliophyta; eudicotyledons; core eudicotyledons; rosids; malvids; Brassicales; Brassicaceae; Camelineae; Arabidopsis	sp|Q9FLC0|PER52_ARATH	563	E:0	RecName: Full=Peroxidase 52;^Eukaryota; Viridiplantae; Streptophyta; Embryophyta; Tracheophyta; Spermatophyta; Magnoliophyta; eudicotyledons; core eudicotyledons; rosids; malvids; Brassicales; Brassicaceae; Camelineae; Arabidopsis	PF00141.18	peroxidase	Peroxidase	.	.	.	c45077_g1|m.6391	240-1340[-]	sigP:1^35^0.594^YES	.	GO:0042744|hydrogen peroxide catabolic process	GO:0020037|heme binding;GO:0046872|metal ion binding;GO:0004601|peroxidase activity	GO:0048046|apoplast;GO:0005618|cell wall;GO:0005829|cytosol;GO:0005794|Golgi apparatus	K00430|E1.11.1.7; peroxidase [EC:1.11.1.7]	map01100|Metabolic pathways;map00940|Phenylpropanoid biosynthesis;map01110|Biosynthesis of secondary metabolites
c29022_g1	21.6664	4.43739	0.00148032	0.020269	up	yes	gi|567153481|ref|XM_006417441.1|	195	9e-97	Eutrema salsugineum hypothetical protein (EUTSA_v10007516mg) mRNA, complete cds	gi|567129576|ref|XP_006392303.1|	936	3e-122	hypothetical protein EUTSA_v10023431mg [Eutrema salsugineum]	sp|Q42400|AAP1_ARATH	354	E:3e-119	RecName: Full=Amino acid permease 1;^Eukaryota; Viridiplantae; Streptophyta; Embryophyta; Tracheophyta; Spermatophyta; Magnoliophyta; eudicotyledons; core eudicotyledons; rosids; malvids; Brassicales; Brassicaceae; Camelineae; Arabidopsis	sp|Q42400|AAP1_ARATH	392	E:2e-134	RecName: Full=Amino acid permease 1;^Eukaryota; Viridiplantae; Streptophyta; Embryophyta; Tracheophyta; Spermatophyta; Magnoliophyta; eudicotyledons; core eudicotyledons; rosids; malvids; Brassicales; Brassicaceae; Camelineae; Arabidopsis	PF01490.13	Aa_trans	Transmembrane amino acid transporter protein	NOG126188	Amino acid protein	.	c29022_g1|m.6462	2-610[+]	.	ExpAA=107.44^PredHel=5^Topology=i7-29o46-68i105-127o132-151i172-194o	GO:0043090|amino acid import;GO:0009624|response to nematode	GO:0015175|neutral amino acid transmembrane transporter activity;GO:0015293|symporter activity	GO:0016021|integral to membrane;GO:0005886|plasma membrane	.	.
c50650_g1	13.752	3.78157	6.87614e-05	0.00271179	up	yes	gi|297801287|ref|XM_002868482.1|	2098	0	Arabidopsis lyrata subsp. lyrata EMB2656, mRNA	gi|567194780|ref|XP_006405850.1|	3931	0	hypothetical protein EUTSA_v10027629mg [Eutrema salsugineum]	sp|Q9YHB5|CND3_XENLA	129	E:5e-29	RecName: Full=Condensin complex subunit 3;^Eukaryota; Metazoa; Chordata; Craniata; Vertebrata; Euteleostomi; Amphibia; Batrachia; Anura; Pipoidea; Pipidae; Xenopodinae; Xenopus; Xenopus	sp|Q9BPX3|CND3_HUMAN	176	E:1e-43	RecName: Full=Condensin complex subunit 3;^Eukaryota; Metazoa; Chordata; Craniata; Vertebrata; Euteleostomi; Mammalia; Eutheria; Euarchontoglires; Primates; Haplorrhini; Catarrhini; Hominidae; Homo	PF12719.2	Cnd3	Nuclear condensing complex subunits, C-term domain	COG5218	Chromosome condensation complex Condensin, subunit G	.	c50650_g1|m.6806	1-3291[+]	.	.	GO:0051301|cell division;GO:0007076|mitotic chromosome condensation	.	GO:0015629|actin cytoskeleton;GO:0005813|centrosome;GO:0000796|condensin complex;GO:0005634|nucleus	K06678|YCG1, CAPG; condensin complex subunit 3	map04111|Cell cycle - yeast
c45180_g4	6.29371	2.65391	0.000791289	0.0135152	up	yes	gi|567147650|ref|XM_006415796.1|	809	0	Eutrema salsugineum hypothetical protein (EUTSA_v10006964mg) mRNA, complete cds	gi|567147651|ref|XP_006415859.1|	1412	0	hypothetical protein EUTSA_v10006964mg [Eutrema salsugineum]	sp|Q9C9N5|Y1668_ARATH	267	E:3e-80	RecName: Full=Probable inactive leucine-rich repeat receptor-like protein kinase At1g66830;^Eukaryota; Viridiplantae; Streptophyta; Embryophyta; Tracheophyta; Spermatophyta; Magnoliophyta; eudicotyledons; core eudicotyledons; rosids; malvids; Brassicales; Brassicaceae; Camelineae; Arabidopsis	sp|Q9C9N5|Y1668_ARATH	298	E:5e-93	RecName: Full=Probable inactive leucine-rich repeat receptor-like protein kinase At1g66830;^Eukaryota; Viridiplantae; Streptophyta; Embryophyta; Tracheophyta; Spermatophyta; Magnoliophyta; eudicotyledons; core eudicotyledons; rosids; malvids; Brassicales; Brassicaceae; Camelineae; Arabidopsis	PF08263.7	LRRNT_2	Leucine rich repeat N-terminal domain	COG4886	Leucine-rich repeat (LRR) protein	.	c45180_g4|m.6830	3-1085[-]	sigP:1^22^0.768^YES	ExpAA=22.96^PredHel=1^Topology=o316-338i	.	GO:0005524|ATP binding;GO:0004672|protein kinase activity	GO:0016021|integral to membrane;GO:0005886|plasma membrane	.	.
c42063_g2	27.084	4.75937	0.00079614	0.0135644	up	yes	gi|199580331|gb|AC189637.2|	424	0	Brassica rapa subsp. pekinensis clone KBrS004O21, complete sequence	gi|297798594|ref|XP_002867181.1|	800	3e-104	AtMYB69 [Arabidopsis lyrata subsp. lyrata]	sp|Q9FDW1|MYB44_ARATH	88.2	E:3e-19	RecName: Full=Transcription factor MYB44;^Eukaryota; Viridiplantae; Streptophyta; Embryophyta; Tracheophyta; Spermatophyta; Magnoliophyta; eudicotyledons; core eudicotyledons; rosids; malvids; Brassicales; Brassicaceae; Camelineae; Arabidopsis	sp|Q9FDW1|MYB44_ARATH	88.6	E:1e-19	RecName: Full=Transcription factor MYB44;^Eukaryota; Viridiplantae; Streptophyta; Embryophyta; Tracheophyta; Spermatophyta; Magnoliophyta; eudicotyledons; core eudicotyledons; rosids; malvids; Brassicales; Brassicaceae; Camelineae; Arabidopsis	PF13921.1	Myb_DNA-bind_6	Myb-like DNA-binding domain	COG5147	Myb superfamily proteins, including transcription factors and mRNA splicing factors	.	c42063_g2|m.7011	1-606[+]	.	.	GO:0009738|abscisic acid mediated signaling pathway;GO:0042742|defense response to bacterium;GO:0050832|defense response to fungus;GO:2000022|regulation of jasmonic acid mediated signaling pathway;GO:2000031|regulation of salicylic acid mediated signaling pathway;GO:0009737|response to abscisic acid stimulus;GO:0009733|response to auxin stimulus;GO:0046686|response to cadmium ion;GO:0010200|respo…	GO:0003682|chromatin binding;GO:0003677|DNA binding;GO:0003700|sequence-specific DNA binding transcription factor activity	GO:0005634|nucleus	K09422|MYBP; myb proto-oncogene protein, plant	.
c43178_g1	0.117611	-3.0879	0.0016265	0.0214638	down	yes	gi|567120715|ref|XM_006390143.1|	783	0	Eutrema salsugineum hypothetical protein (EUTSA_v10018707mg) mRNA, complete cds	gi|567120716|ref|XP_006390205.1|	1650	0	hypothetical protein EUTSA_v10018707mg [Eutrema salsugineum]	sp|Q9FE20|PBS1_ARATH	410	E:2e-134	RecName: Full=Serine/threonine-protein kinase PBS1;^Eukaryota; Viridiplantae; Streptophyta; Embryophyta; Tracheophyta; Spermatophyta; Magnoliophyta; eudicotyledons; core eudicotyledons; rosids; malvids; Brassicales; Brassicaceae; Camelineae; Arabidopsis	sp|Q9FE20|PBS1_ARATH	410	E:2e-139	RecName: Full=Serine/threonine-protein kinase PBS1;^Eukaryota; Viridiplantae; Streptophyta; Embryophyta; Tracheophyta; Spermatophyta; Magnoliophyta; eudicotyledons; core eudicotyledons; rosids; malvids; Brassicales; Brassicaceae; Camelineae; Arabidopsis	PF00069.20	Pkinase	Protein kinase domain	COG0515	Serine/threonine protein kinase	.	c43178_g1|m.7112	839-1852[+]	.	.	GO:0009816|defense response to bacterium, incompatible interaction;GO:0046777|protein autophosphorylation	GO:0005524|ATP binding;GO:0004674|protein serine/threonine kinase activity	.	K13430|PBS1; serine/threonine-protein kinase PBS1 [EC:2.7.11.1]	map04626|Plant-pathogen interaction
c47323_g1	11.4036	3.51142	0.000485677	0.00993189	up	yes	gi|567154069|ref|XM_006417612.1|	601	0	Eutrema salsugineum hypothetical protein (EUTSA_v10008289mg) mRNA, complete cds	gi|567154073|ref|XP_006417676.1|	1007	5e-141	hypothetical protein EUTSA_v10008289mg [Eutrema salsugineum]	sp|Q42374|SY111_ARATH	369	E:7e-135	RecName: Full=Syntaxin-related protein KNOLLE;^Eukaryota; Viridiplantae; Streptophyta; Embryophyta; Tracheophyta; Spermatophyta; Magnoliophyta; eudicotyledons; core eudicotyledons; rosids; malvids; Brassicales; Brassicaceae; Camelineae; Arabidopsis`sp|Q42374|SY111_ARATH	sp|Q42374|SY111_ARATH	369	E:3e-127	RecName: Full=Syntaxin-related protein KNOLLE;^Eukaryota; Viridiplantae; Streptophyta; Embryophyta; Tracheophyta; Spermatophyta; Magnoliophyta; eudicotyledons; core eudicotyledons; rosids; malvids; Brassicales; Brassicaceae; Camelineae; Arabidopsis	PF00804.20	Syntaxin	Syntaxin	COG5074	t-SNARE complex subunit, syntaxin	.	c47323_g1|m.7365	403-1065[-]	.	.	GO:0007049|cell cycle;GO:0051301|cell division;GO:0006886|intracellular protein transport;GO:0016192|vesicle-mediated transport	.	GO:0009504|cell plate;GO:0012505|endomembrane system;GO:0016021|integral to membrane;GO:0009524|phragmoplast;GO:0005886|plasma membrane;GO:0009506|plasmodesma	K08486|STX1B_2_3; syntaxin 1B/2/3	map04721|Synaptic vesicle cycle;map04130|SNARE interactions in vesicular transport
c52594_g1	6.62422	2.72775	0.00315756	0.0329589	up	yes	gi|567218315|ref|XM_006412724.1|	1899	0	Eutrema salsugineum hypothetical protein (EUTSA_v10024298mg) mRNA, complete cds	gi|674236787|gb|KFK29552.1|	4297	0	hypothetical protein AALP_AA7G148700 [Arabis alpina]	sp|P42730|CLPB1_ARATH	54.3	E:7e-06	RecName: Full=Chaperone protein ClpB1;^Eukaryota; Viridiplantae; Streptophyta; Embryophyta; Tracheophyta; Spermatophyta; Magnoliophyta; eudicotyledons; core eudicotyledons; rosids; malvids; Brassicales; Brassicaceae; Camelineae; Arabidopsis	sp|P42730|CLPB1_ARATH	55.1	E:3e-06	RecName: Full=Chaperone protein ClpB1;^Eukaryota; Viridiplantae; Streptophyta; Embryophyta; Tracheophyta; Spermatophyta; Magnoliophyta; eudicotyledons; core eudicotyledons; rosids; malvids; Brassicales; Brassicaceae; Camelineae; Arabidopsis	PF02861.15	Clp_N	Clp amino terminal domain	COG0542	ATPases with chaperone activity, ATP-binding subunit	.	c52594_g1|m.7998	200-3244[+]	.	.	GO:0043335|protein unfolding;GO:0009408|response to heat;GO:0009644|response to high light intensity;GO:0042542|response to hydrogen peroxide	GO:0005524|ATP binding;GO:0017111|nucleoside-triphosphatase activity	GO:0009941|chloroplast envelope;GO:0009570|chloroplast stroma;GO:0005829|cytosol;GO:0005634|nucleus	K03695|clpB; ATP-dependent Clp protease ATP-binding subunit ClpB	.
c50967_g4	4.44193	2.15119	0.00130144	0.018618	up	yes	gi|334183797|ref|NM_105674.5|	894	0	Arabidopsis thaliana paired amphipathic helix protein Sin3-like 4 mRNA, complete cds	gi|567123528|ref|XP_006390928.1|	1867	0	hypothetical protein EUTSA_v10018014mg [Eutrema salsugineum]	sp|O04539|SNL4_ARATH	693	E:0	RecName: Full=Paired amphipathic helix protein Sin3-like 4;^Eukaryota; Viridiplantae; Streptophyta; Embryophyta; Tracheophyta; Spermatophyta; Magnoliophyta; eudicotyledons; core eudicotyledons; rosids; malvids; Brassicales; Brassicaceae; Camelineae; Arabidopsis	sp|O04539|SNL4_ARATH	754	E:0	RecName: Full=Paired amphipathic helix protein Sin3-like 4;^Eukaryota; Viridiplantae; Streptophyta; Embryophyta; Tracheophyta; Spermatophyta; Magnoliophyta; eudicotyledons; core eudicotyledons; rosids; malvids; Brassicales; Brassicaceae; Camelineae; Arabidopsis	PF02671.16	PAH	Paired amphipathic helix repeat	COG5602	Histone deacetylase complex, SIN3 component	.	c50967_g4|m.8300	145-1521[+]	.	.	GO:0006355|regulation of transcription, DNA-dependent;GO:0006351|transcription, DNA-dependent	.	GO:0005634|nucleus	K11644|SIN3A; paired amphipathic helix protein Sin3a	map05016|Huntington's disease;map04919|Thyroid hormone signaling pathway;map05202|Transcriptional misregulation in cancer
c52268_g4	28.8925	4.85263	0.00130596	0.0186438	up	yes	gi|167180|gb|M97667.1|BNASTKR	424	0	Brassica napus ssp. oleifera serine/threonine kinase receptor mRNA, complete cds	gi|399221239|gb|AFP33765.1|	2029	0	SRK [Arabidopsis halleri subsp. gemmifera]	sp|O81905|SD18_ARATH	748	E:0	RecName: Full=Receptor-like serine/threonine-protein kinase SD1-8;^Eukaryota; Viridiplantae; Streptophyta; Embryophyta; Tracheophyta; Spermatophyta; Magnoliophyta; eudicotyledons; core eudicotyledons; rosids; malvids; Brassicales; Brassicaceae; Camelineae; Arabidopsis	sp|O81905|SD18_ARATH	789	E:0	RecName: Full=Receptor-like serine/threonine-protein kinase SD1-8;^Eukaryota; Viridiplantae; Streptophyta; Embryophyta; Tracheophyta; Spermatophyta; Magnoliophyta; eudicotyledons; core eudicotyledons; rosids; malvids; Brassicales; Brassicaceae; Camelineae; Arabidopsis	PF00954.15	S_locus_glycop	S-locus glycoprotein family	COG0515	Serine/threonine protein kinase	.	c52268_g4|m.8501	2-1678[+]	.	ExpAA=20.94^PredHel=1^Topology=o283-305i	GO:0048544|recognition of pollen	GO:0005524|ATP binding;GO:0004675|transmembrane receptor protein serine/threonine kinase activity	GO:0016021|integral to membrane;GO:0005886|plasma membrane;GO:0009506|plasmodesma;GO:0005773|vacuole	.	.
c46417_g1	7.11506	2.83088	4.47396e-05	0.00202186	up	yes	gi|567219019|ref|XM_006413076.1|	808	0	Eutrema salsugineum hypothetical protein (EUTSA_v10025598mg) mRNA, complete cds	gi|727514226|ref|XP_010433438.1|	1684	0	PREDICTED: GDSL esterase/lipase At4g26790 [Camelina sativa]	sp|Q8VY93|GDL66_ARATH	646	E:0	RecName: Full=GDSL esterase/lipase At4g26790;^Eukaryota; Viridiplantae; Streptophyta; Embryophyta; Tracheophyta; Spermatophyta; Magnoliophyta; eudicotyledons; core eudicotyledons; rosids; malvids; Brassicales; Brassicaceae; Camelineae; Arabidopsis	sp|Q8VY93|GDL66_ARATH	652	E:0	RecName: Full=GDSL esterase/lipase At4g26790;^Eukaryota; Viridiplantae; Streptophyta; Embryophyta; Tracheophyta; Spermatophyta; Magnoliophyta; eudicotyledons; core eudicotyledons; rosids; malvids; Brassicales; Brassicaceae; Camelineae; Arabidopsis	PF00657.17	Lipase_GDSL	GDSL-like Lipase/Acylhydrolase	COG3240	Phospholipase/lecithinase/hemolysin	.	c46417_g1|m.8830	135-1190[-]	sigP:1^25^0.72^YES	.	GO:0016042|lipid catabolic process	GO:0016788|hydrolase activity, acting on ester bonds	GO:0005576|extracellular region	.	.
c40144_g1	10.5636	3.40103	0.00117157	0.0174483	up	yes	gi|30692852|ref|NM_180333.1|	1112	0	Arabidopsis thaliana asparagine synthetase [glutamine-hydrolyzing] mRNA, complete cds	gi|30692853|ref|NP_850664.1|	2040	0	asparagine synthetase [glutamine-hydrolyzing] [Arabidopsis thaliana]	sp|P49078|ASNS_ARATH	774	E:0	RecName: Full=Asparagine synthetase [glutamine-hydrolyzing] 1;^Eukaryota; Viridiplantae; Streptophyta; Embryophyta; Tracheophyta; Spermatophyta; Magnoliophyta; eudicotyledons; core eudicotyledons; rosids; malvids; Brassicales; Brassicaceae; Camelineae; Arabidopsis`sp|P49078|ASNS_ARATH	sp|P49078|ASNS_ARATH	840	E:0	RecName: Full=Asparagine synthetase [glutamine-hydrolyzing] 1;^Eukaryota; Viridiplantae; Streptophyta; Embryophyta; Tracheophyta; Spermatophyta; Magnoliophyta; eudicotyledons; core eudicotyledons; rosids; malvids; Brassicales; Brassicaceae; Camelineae; Arabidopsis	PF13522.1	GATase_6	Glutamine amidotransferase domain	COG0367	Asparagine synthase (glutamine-hydrolyzing)	.	c40144_g1|m.9914	190-1473[+]	.	.	GO:0006529|asparagine biosynthetic process;GO:0009063|cellular amino acid catabolic process;GO:0043617|cellular response to sucrose starvation;GO:0006541|glutamine metabolic process;GO:0070981|L-asparagine biosynthetic process;GO:0009646|response to absence of light;GO:0009750|response to fructose stimulus;GO:0009749|response to glucose stimulus;GO:0009744|response to sucrose stimulus	GO:0004066|asparagine synthase (glutamine-hydrolyzing) activity;GO:0005524|ATP binding	.	K01953|asnB, ASNS; asparagine synthase (glutamine-hydrolysing) [EC:6.3.5.4]	map00250|Alanine, aspartate and glutamate metabolism;map01100|Metabolic pathways;map01110|Biosynthesis of secondary metabolites
c47596_g3	0.342354	-1.54644	0.00393746	0.0381518	down	yes	gi|567183022|ref|XM_006402501.1|	343	1e-178	Eutrema salsugineum hypothetical protein (EUTSA_v10006014mg) mRNA, complete cds	gi|297824557|ref|XP_002880161.1|	1223	4e-161	hypothetical protein ARALYDRAFT_483649 [Arabidopsis lyrata subsp. lyrata]	sp|P73548|CDSA_SYNY3	120	E:8e-29	RecName: Full=Phosphatidate cytidylyltransferase;^Bacteria; Cyanobacteria; Chroococcales; Synechocystis	sp|P73548|CDSA_SYNY3	68.9	E:6e-13	RecName: Full=Phosphatidate cytidylyltransferase;^Bacteria; Cyanobacteria; Chroococcales; Synechocystis	PF01148.15	CTP_transf_1	Cytidylyltransferase family	COG0575	CDP-diglyceride synthetase	.	c47596_g3|m.9936	1-576[+]	.	ExpAA=68.36^PredHel=2^Topology=i53-75o108-130i	GO:0016024|CDP-diacylglycerol biosynthetic process	GO:0004605|phosphatidate cytidylyltransferase activity	GO:0016021|integral to membrane;GO:0005886|plasma membrane	.	.
c38147_g1	9.8371	3.29823	0.0011785	0.0175042	up	yes	gi|567120736|ref|XM_006390149.1|	476	0	Eutrema salsugineum hypothetical protein (EUTSA_v10018589mg) mRNA, complete cds	gi|297842387|ref|XP_002889075.1|	1021	0	predicted protein [Arabidopsis lyrata subsp. lyrata]	sp|Q9SFW6|CCB24_ARATH	392	E:0	RecName: Full=Cyclin-B2-4;^Eukaryota; Viridiplantae; Streptophyta; Embryophyta; Tracheophyta; Spermatophyta; Magnoliophyta; eudicotyledons; core eudicotyledons; rosids; malvids; Brassicales; Brassicaceae; Camelineae; Arabidopsis`sp|Q9SFW6|CCB24_ARATH	sp|Q9SFW6|CCB24_ARATH	392	E:1e-134	RecName: Full=Cyclin-B2-4;^Eukaryota; Viridiplantae; Streptophyta; Embryophyta; Tracheophyta; Spermatophyta; Magnoliophyta; eudicotyledons; core eudicotyledons; rosids; malvids; Brassicales; Brassicaceae; Camelineae; Arabidopsis	PF00134.18	Cyclin_N	Cyclin, N-terminal domain	COG5024	Cyclin	.	c38147_g1|m.10351	971-1636[-]	.	.	GO:0007049|cell cycle;GO:0051301|cell division;GO:0000079|regulation of cyclin-dependent protein kinase activity	.	GO:0005634|nucleus	K05868|CCNB; cyclin B	map04110|Cell cycle;map04068|FoxO signaling pathway;map04914|Progesterone-mediated oocyte maturation;map04115|p53 signaling pathway
c49408_g1	4.9146	2.29707	0.000923995	0.0149322	up	yes	gi|297831095|ref|XM_002883384.1|	1312	0	Arabidopsis lyrata subsp. lyrata hypothetical protein, mRNA	gi|297831096|ref|XP_002883430.1|	3247	0	hypothetical protein ARALYDRAFT_479855 [Arabidopsis lyrata subsp. lyrata]	sp|Q9LW56|FAO3_ARATH	1234	E:0	RecName: Full=Long-chain-alcohol oxidase FAO3;^Eukaryota; Viridiplantae; Streptophyta; Embryophyta; Tracheophyta; Spermatophyta; Magnoliophyta; eudicotyledons; core eudicotyledons; rosids; malvids; Brassicales; Brassicaceae; Camelineae; Arabidopsis	sp|Q9LW56|FAO3_ARATH	1234	E:0	RecName: Full=Long-chain-alcohol oxidase FAO3;^Eukaryota; Viridiplantae; Streptophyta; Embryophyta; Tracheophyta; Spermatophyta; Magnoliophyta; eudicotyledons; core eudicotyledons; rosids; malvids; Brassicales; Brassicaceae; Camelineae; Arabidopsis	PF01946.12	Thi4	Thi4 family	COG2303	Choline dehydrogenase and related flavoproteins	.	c49408_g1|m.10496	1926-4154[-]	.	.	GO:0006066|alcohol metabolic process	GO:0050660|flavin adenine dinucleotide binding;GO:0046577|long-chain-alcohol oxidase activity	GO:0016021|integral to membrane;GO:0043231|intracellular membrane-bounded organelle	K17756|FAO3; long-chain-alcohol oxidase [EC:1.1.3.20]	.
c49408_g1	4.9146	2.29707	0.000923995	0.0149322	up	yes	gi|297831095|ref|XM_002883384.1|	1312	0	Arabidopsis lyrata subsp. lyrata hypothetical protein, mRNA	gi|297831096|ref|XP_002883430.1|	3247	0	hypothetical protein ARALYDRAFT_479855 [Arabidopsis lyrata subsp. lyrata]	sp|Q9LW56|FAO3_ARATH	1234	E:0	RecName: Full=Long-chain-alcohol oxidase FAO3;^Eukaryota; Viridiplantae; Streptophyta; Embryophyta; Tracheophyta; Spermatophyta; Magnoliophyta; eudicotyledons; core eudicotyledons; rosids; malvids; Brassicales; Brassicaceae; Camelineae; Arabidopsis	sp|Q8S403|PHO1_ARATH	1016	E:0	RecName: Full=Phosphate transporter PHO1;^Eukaryota; Viridiplantae; Streptophyta; Embryophyta; Tracheophyta; Spermatophyta; Magnoliophyta; eudicotyledons; core eudicotyledons; rosids; malvids; Brassicales; Brassicaceae; Camelineae; Arabidopsis	PF03105.14	SPX	SPX domain	COG5409	EXS domain-containing protein	.	c49408_g1|m.10497	3-1637[+]	.	ExpAA=135.53^PredHel=6^Topology=i147-169o189-211i235-257o267-289i416-435o463-480i	GO:0016036|cellular response to phosphate starvation	GO:0015114|phosphate ion transmembrane transporter activity	GO:0005794|Golgi apparatus;GO:0016021|integral to membrane;GO:0005886|plasma membrane;GO:0005802|trans-Golgi network	K17756|FAO3; long-chain-alcohol oxidase [EC:1.1.3.20]	.
c48013_g2	2.37578	1.2484	0.00219227	0.0260717	up	yes	gi|567146926|ref|XM_006415591.1|	1186	0	Eutrema salsugineum hypothetical protein (EUTSA_v10006677mg) mRNA, complete cds	gi|567146927|ref|XP_006415654.1|	2217	0	hypothetical protein EUTSA_v10006677mg [Eutrema salsugineum]	sp|Q9SGP2|HSL1_ARATH	834	E:0	RecName: Full=Receptor-like protein kinase HSL1;^Eukaryota; Viridiplantae; Streptophyta; Embryophyta; Tracheophyta; Spermatophyta; Magnoliophyta; eudicotyledons; core eudicotyledons; rosids; malvids; Brassicales; Brassicaceae; Camelineae; Arabidopsis`sp|Q9SGP2|HSL1_ARATH	sp|Q9SGP2|HSL1_ARATH	971	E:0	RecName: Full=Receptor-like protein kinase HSL1;^Eukaryota; Viridiplantae; Streptophyta; Embryophyta; Tracheophyta; Spermatophyta; Magnoliophyta; eudicotyledons; core eudicotyledons; rosids; malvids; Brassicales; Brassicaceae; Camelineae; Arabidopsis`sp|Q9SGP2|HSL1_ARATH	PF08263.7	LRRNT_2	Leucine rich repeat N-terminal domain	COG4886	Leucine-rich repeat (LRR) protein	.	c48013_g2|m.10826	165-1838[+]	sigP:1^15^0.89^YES	.	.	GO:0005524|ATP binding;GO:0004674|protein serine/threonine kinase activity	GO:0016021|integral to membrane;GO:0005886|plasma membrane	K00924|E2.7.1.-	.
c36716_g1	6.60957	2.72456	0.00460218	0.04236	up	yes	gi|567122820|ref|XM_006390670.1|	1097	0	Eutrema salsugineum hypothetical protein (EUTSA_v10018419mg) mRNA, complete cds	gi|567122821|ref|XP_006390732.1|	2238	0	hypothetical protein EUTSA_v10018419mg [Eutrema salsugineum]	sp|Q9SIA4|MATE5_ARATH	199	E:2e-54	RecName: Full=MATE efflux family protein 5;^Eukaryota; Viridiplantae; Streptophyta; Embryophyta; Tracheophyta; Spermatophyta; Magnoliophyta; eudicotyledons; core eudicotyledons; rosids; malvids; Brassicales; Brassicaceae; Camelineae; Arabidopsis	sp|Q9SIA4|MATE5_ARATH	223	E:1e-64	RecName: Full=MATE efflux family protein 5;^Eukaryota; Viridiplantae; Streptophyta; Embryophyta; Tracheophyta; Spermatophyta; Magnoliophyta; eudicotyledons; core eudicotyledons; rosids; malvids; Brassicales; Brassicaceae; Camelineae; Arabidopsis	PF01554.13	MatE	MatE	COG0534	Na+-driven multidrug efflux pump	.	c36716_g1|m.10875	426-1937[+]	.	ExpAA=228.64^PredHel=11^Topology=o34-56i63-85o105-127i177-196o206-228i249-271o291-313i333-355o370-389i410-432o436-458i	.	GO:0015297|antiporter activity;GO:0015238|drug transmembrane transporter activity	GO:0016021|integral to membrane	K03327|TC.MATE, SLC47A, norM, mdtK, dinF; multidrug resistance protein, MATE family	.
c49969_g1	33.7942	5.07871	2.5933e-09	1.34886e-06	up	yes	gi|30694692|ref|NM_103883.2|	381	0	Arabidopsis thaliana nucleobase-ascorbate transporter 4 mRNA, complete cds	gi|727612682|ref|XP_010479409.1|	888	0	PREDICTED: nucleobase-ascorbate transporter 4 isoform X1 [Camelina sativa]	sp|P93039|NAT4_ARATH	337	E:2e-174	RecName: Full=Nucleobase-ascorbate transporter 4;^Eukaryota; Viridiplantae; Streptophyta; Embryophyta; Tracheophyta; Spermatophyta; Magnoliophyta; eudicotyledons; core eudicotyledons; rosids; malvids; Brassicales; Brassicaceae; Camelineae; Arabidopsis`sp|P93039|NAT4_ARATH	sp|P93039|NAT4_ARATH	338	E:1e-112	RecName: Full=Nucleobase-ascorbate transporter 4;^Eukaryota; Viridiplantae; Streptophyta; Embryophyta; Tracheophyta; Spermatophyta; Magnoliophyta; eudicotyledons; core eudicotyledons; rosids; malvids; Brassicales; Brassicaceae; Camelineae; Arabidopsis	PF00860.15	Xan_ur_permease	Permease family	COG2233	Xanthine/uracil permeases	.	c49969_g1|m.10971	804-1376[+]	.	ExpAA=70.92^PredHel=4^Topology=i24-46o89-111i132-151o166-183i	GO:0055085|transmembrane transport	GO:0005215|transporter activity	GO:0016021|integral to membrane	.	.
c49969_g1	33.7942	5.07871	2.5933e-09	1.34886e-06	up	yes	gi|30694692|ref|NM_103883.2|	381	0	Arabidopsis thaliana nucleobase-ascorbate transporter 4 mRNA, complete cds	gi|727612682|ref|XP_010479409.1|	888	0	PREDICTED: nucleobase-ascorbate transporter 4 isoform X1 [Camelina sativa]	sp|P93039|NAT4_ARATH	337	E:2e-174	RecName: Full=Nucleobase-ascorbate transporter 4;^Eukaryota; Viridiplantae; Streptophyta; Embryophyta; Tracheophyta; Spermatophyta; Magnoliophyta; eudicotyledons; core eudicotyledons; rosids; malvids; Brassicales; Brassicaceae; Camelineae; Arabidopsis`sp|P93039|NAT4_ARATH	sp|P93039|NAT4_ARATH	298	E:5e-96	RecName: Full=Nucleobase-ascorbate transporter 4;^Eukaryota; Viridiplantae; Streptophyta; Embryophyta; Tracheophyta; Spermatophyta; Magnoliophyta; eudicotyledons; core eudicotyledons; rosids; malvids; Brassicales; Brassicaceae; Camelineae; Arabidopsis	PF00860.15	Xan_ur_permease	Permease family	COG2233	Xanthine/uracil permeases	.	c49969_g1|m.10970	2-790[+]	.	ExpAA=144.32^PredHel=6^Topology=i29-51o83-105i129-151o171-193i200-222o232-249i	GO:0055085|transmembrane transport	GO:0005215|transporter activity	GO:0016021|integral to membrane	.	.
c34946_g2	37.0577	5.2117	1.70771e-09	9.2307e-07	up	yes	gi|332656411|gb|CP002687.1|	296	6e-153	Arabidopsis thaliana chromosome 4 sequence	gi|297809237|ref|XP_002872502.1|	558	1e-69	ATHSP22.0 [Arabidopsis lyrata subsp. lyrata]	sp|Q38806|HSP22_ARATH	217	E:6e-70	RecName: Full=22.0 kDa heat shock protein;^Eukaryota; Viridiplantae; Streptophyta; Embryophyta; Tracheophyta; Spermatophyta; Magnoliophyta; eudicotyledons; core eudicotyledons; rosids; malvids; Brassicales; Brassicaceae; Camelineae; Arabidopsis	sp|Q38806|HSP22_ARATH	236	E:3e-78	RecName: Full=22.0 kDa heat shock protein;^Eukaryota; Viridiplantae; Streptophyta; Embryophyta; Tracheophyta; Spermatophyta; Magnoliophyta; eudicotyledons; core eudicotyledons; rosids; malvids; Brassicales; Brassicaceae; Camelineae; Arabidopsis	PF04969.11	CS	CS domain	COG0071	Molecular chaperone (small heat shock protein)	.	c34946_g2|m.10994	1-381[+]	.	.	GO:0009408|response to heat	.	GO:0005783|endoplasmic reticulum	K13993|HSP20; HSP20 family protein	map04141|Protein processing in endoplasmic reticulum
c42237_g4	25.4904	4.67188	9.11021e-07	0.000111618	up	yes	gi|567213586|ref|XM_006410855.1|	361	0	Eutrema salsugineum hypothetical protein (EUTSA_v10016295mg) mRNA, complete cds	gi|567213587|ref|XP_006410918.1|	889	2e-111	hypothetical protein EUTSA_v10016295mg [Eutrema salsugineum]	sp|Q9LFG8|AB20G_ARATH	337	E:4e-109	RecName: Full=ABC transporter G family member 20;^Eukaryota; Viridiplantae; Streptophyta; Embryophyta; Tracheophyta; Spermatophyta; Magnoliophyta; eudicotyledons; core eudicotyledons; rosids; malvids; Brassicales; Brassicaceae; Camelineae; Arabidopsis	sp|Q9LFG8|AB20G_ARATH	337	E:2e-110	RecName: Full=ABC transporter G family member 20;^Eukaryota; Viridiplantae; Streptophyta; Embryophyta; Tracheophyta; Spermatophyta; Magnoliophyta; eudicotyledons; core eudicotyledons; rosids; malvids; Brassicales; Brassicaceae; Camelineae; Arabidopsis	PF01061.19	ABC2_membrane	ABC-2 type transporter	COG1131	ABC-type multidrug transport system, ATPase component	.	c42237_g4|m.11001	2-502[+]	.	ExpAA=53.14^PredHel=2^Topology=o18-40i136-158o	GO:0006200|ATP catabolic process;GO:0006810|transport	GO:0005524|ATP binding;GO:0016887|ATPase activity	GO:0016021|integral to membrane	.	.
c48548_g3	5.51983	2.46462	0.00367568	0.0365066	up	yes	gi|297837706|ref|XM_002886689.1|	348	0	Arabidopsis lyrata subsp. lyrata hypothetical protein, mRNA	gi|567190691|ref|XP_006404711.1|	1805	0	hypothetical protein EUTSA_v10000657mg [Eutrema salsugineum]	sp|Q9FKA7|ORTH1_ARATH	666	E:0	RecName: Full=E3 ubiquitin-protein ligase ORTHRUS 1;^Eukaryota; Viridiplantae; Streptophyta; Embryophyta; Tracheophyta; Spermatophyta; Magnoliophyta; eudicotyledons; core eudicotyledons; rosids; malvids; Brassicales; Brassicaceae; Camelineae; Arabidopsis	sp|Q8VYZ0|ORTH2_ARATH	261	E:2e-82	RecName: Full=E3 ubiquitin-protein ligase ORTHRUS 2;^Eukaryota; Viridiplantae; Streptophyta; Embryophyta; Tracheophyta; Spermatophyta; Magnoliophyta; eudicotyledons; core eudicotyledons; rosids; malvids; Brassicales; Brassicaceae; Camelineae; Arabidopsis	PF02182.12	SAD_SRA	SAD/SRA domain	COG3440	Predicted restriction endonuclease	.	c48548_g3|m.11899	1383-1817[+]	.	.	GO:0051301|cell division;GO:0031508|centromeric heterochromatin assembly;GO:0010424|DNA methylation on cytosine within a CG sequence;GO:0090309|positive regulation of methylation-dependent chromatin silencing	GO:0003682|chromatin binding;GO:0010385|double-stranded methylated DNA binding;GO:0046872|metal ion binding;GO:0008327|methyl-CpG binding;GO:0010428|methyl-CpNpG binding;GO:0010429|methyl-CpNpN binding;GO:0004842|ubiquitin-protein ligase activity;GO:0008270|zinc ion binding	GO:0010369|chromocenter;GO:0005634|nucleus	K10638|UHRF1, NP95; E3 ubiquitin-protein ligase UHRF1 [EC:2.3.2.27]	.
c48548_g3	5.51983	2.46462	0.00367568	0.0365066	up	yes	gi|297837706|ref|XM_002886689.1|	348	0	Arabidopsis lyrata subsp. lyrata hypothetical protein, mRNA	gi|567190691|ref|XP_006404711.1|	1805	0	hypothetical protein EUTSA_v10000657mg [Eutrema salsugineum]	sp|Q9FKA7|ORTH1_ARATH	666	E:0	RecName: Full=E3 ubiquitin-protein ligase ORTHRUS 1;^Eukaryota; Viridiplantae; Streptophyta; Embryophyta; Tracheophyta; Spermatophyta; Magnoliophyta; eudicotyledons; core eudicotyledons; rosids; malvids; Brassicales; Brassicaceae; Camelineae; Arabidopsis	sp|Q8VYZ0|ORTH2_ARATH	506	E:3e-174	RecName: Full=E3 ubiquitin-protein ligase ORTHRUS 2;^Eukaryota; Viridiplantae; Streptophyta; Embryophyta; Tracheophyta; Spermatophyta; Magnoliophyta; eudicotyledons; core eudicotyledons; rosids; malvids; Brassicales; Brassicaceae; Camelineae; Arabidopsis	PF13920.1	zf-C3HC4_3	Zinc finger, C3HC4 type (RING finger)	COG3440	Predicted restriction endonuclease	.	c48548_g3|m.11897	120-1142[+]	.	.	GO:0051301|cell division;GO:0031508|centromeric heterochromatin assembly;GO:0010424|DNA methylation on cytosine within a CG sequence;GO:0090309|positive regulation of methylation-dependent chromatin silencing	GO:0003682|chromatin binding;GO:0010385|double-stranded methylated DNA binding;GO:0046872|metal ion binding;GO:0008327|methyl-CpG binding;GO:0010428|methyl-CpNpG binding;GO:0010429|methyl-CpNpN binding;GO:0004842|ubiquitin-protein ligase activity;GO:0008270|zinc ion binding	GO:0010369|chromocenter;GO:0005634|nucleus	K10638|UHRF1, NP95; E3 ubiquitin-protein ligase UHRF1 [EC:2.3.2.27]	.
c47578_g1	31.5107	4.97777	2.2309e-07	4.18362e-05	up	yes	gi|567213253|ref|XM_006410766.1|	1259	0	Eutrema salsugineum hypothetical protein (EUTSA_v10016353mg) mRNA, complete cds	gi|727469883|ref|XP_010516881.1|	2720	0	PREDICTED: probable leucine-rich repeat receptor-like protein kinase At1g68400 [Camelina sativa]	sp|Q9M9C5|Y1680_ARATH	424	E:2e-134	RecName: Full=Probable leucine-rich repeat receptor-like protein kinase At1g68400;^Eukaryota; Viridiplantae; Streptophyta; Embryophyta; Tracheophyta; Spermatophyta; Magnoliophyta; eudicotyledons; core eudicotyledons; rosids; malvids; Brassicales; Brassicaceae; Camelineae; Arabidopsis	sp|Q9M9C5|Y1680_ARATH	469	E:3e-154	RecName: Full=Probable leucine-rich repeat receptor-like protein kinase At1g68400;^Eukaryota; Viridiplantae; Streptophyta; Embryophyta; Tracheophyta; Spermatophyta; Magnoliophyta; eudicotyledons; core eudicotyledons; rosids; malvids; Brassicales; Brassicaceae; Camelineae; Arabidopsis	PF08263.7	LRRNT_2	Leucine rich repeat N-terminal domain	COG0515	Serine/threonine protein kinase	.	c47578_g1|m.11955	217-2286[-]	sigP:1^37^0.603^YES	ExpAA=36.04^PredHel=2^Topology=o15-37i285-307o	.	GO:0005524|ATP binding;GO:0004674|protein serine/threonine kinase activity	GO:0016021|integral to membrane;GO:0005886|plasma membrane	.	.
c38659_g2	0.222121	-2.17058	2.30384e-05	0.00125762	down	yes	gi|567120861|ref|XM_006390183.1|	777	0	Eutrema salsugineum hypothetical protein (EUTSA_v10018359mg) mRNA, complete cds	gi|567120862|ref|XP_006390245.1|	1994	0	hypothetical protein EUTSA_v10018359mg [Eutrema salsugineum]	sp|Q8RWL2|CDPKT_ARATH	725	E:0	RecName: Full=Calcium-dependent protein kinase 29;^Eukaryota; Viridiplantae; Streptophyta; Embryophyta; Tracheophyta; Spermatophyta; Magnoliophyta; eudicotyledons; core eudicotyledons; rosids; malvids; Brassicales; Brassicaceae; Camelineae; Arabidopsis	sp|Q8RWL2|CDPKT_ARATH	601	E:0	RecName: Full=Calcium-dependent protein kinase 29;^Eukaryota; Viridiplantae; Streptophyta; Embryophyta; Tracheophyta; Spermatophyta; Magnoliophyta; eudicotyledons; core eudicotyledons; rosids; malvids; Brassicales; Brassicaceae; Camelineae; Arabidopsis	PF00069.20	Pkinase	Protein kinase domain	COG0515	Serine/threonine protein kinase	.	c38659_g2|m.12023	53-1165[+]	.	.	.	GO:0005524|ATP binding;GO:0005509|calcium ion binding;GO:0004674|protein serine/threonine kinase activity	GO:0016020|membrane	K13412|CPK; calcium-dependent protein kinase [EC:2.7.11.1]	map04626|Plant-pathogen interaction;map05145|Toxoplasmosis
c46535_g2	0.100032	-3.32147	0.00094379	0.0151109	down	yes	gi|567207150|ref|XM_006409160.1|	751	0	Eutrema salsugineum hypothetical protein (EUTSA_v10022615mg) mRNA, complete cds	gi|567207151|ref|XP_006409223.1|	1903	0	hypothetical protein EUTSA_v10022615mg [Eutrema salsugineum]	sp|Q7XJR9|CDPKG_ARATH	732	E:0	RecName: Full=Calcium-dependent protein kinase 16;^Eukaryota; Viridiplantae; Streptophyta; Embryophyta; Tracheophyta; Spermatophyta; Magnoliophyta; eudicotyledons; core eudicotyledons; rosids; malvids; Brassicales; Brassicaceae; Camelineae; Arabidopsis`sp|Q7XJR9|CDPKG_ARATH	sp|Q7XJR9|CDPKG_ARATH	350	E:1e-116	RecName: Full=Calcium-dependent protein kinase 16;^Eukaryota; Viridiplantae; Streptophyta; Embryophyta; Tracheophyta; Spermatophyta; Magnoliophyta; eudicotyledons; core eudicotyledons; rosids; malvids; Brassicales; Brassicaceae; Camelineae; Arabidopsis	PF00069.20	Pkinase	Protein kinase domain	COG0515	Serine/threonine protein kinase	.	c46535_g2|m.12469	125-763[+]	.	.	.	GO:0005524|ATP binding;GO:0005509|calcium ion binding;GO:0004672|protein kinase activity;GO:0004674|protein serine/threonine kinase activity	GO:0005886|plasma membrane	K13412|CPK; calcium-dependent protein kinase [EC:2.7.11.1]	map04626|Plant-pathogen interaction;map05145|Toxoplasmosis
c46535_g2	0.100032	-3.32147	0.00094379	0.0151109	down	yes	gi|567207150|ref|XM_006409160.1|	751	0	Eutrema salsugineum hypothetical protein (EUTSA_v10022615mg) mRNA, complete cds	gi|567207151|ref|XP_006409223.1|	1903	0	hypothetical protein EUTSA_v10022615mg [Eutrema salsugineum]	sp|Q7XJR9|CDPKG_ARATH	732	E:0	RecName: Full=Calcium-dependent protein kinase 16;^Eukaryota; Viridiplantae; Streptophyta; Embryophyta; Tracheophyta; Spermatophyta; Magnoliophyta; eudicotyledons; core eudicotyledons; rosids; malvids; Brassicales; Brassicaceae; Camelineae; Arabidopsis`sp|Q7XJR9|CDPKG_ARATH	sp|Q7XJR9|CDPKG_ARATH	701	E:0	RecName: Full=Calcium-dependent protein kinase 16;^Eukaryota; Viridiplantae; Streptophyta; Embryophyta; Tracheophyta; Spermatophyta; Magnoliophyta; eudicotyledons; core eudicotyledons; rosids; malvids; Brassicales; Brassicaceae; Camelineae; Arabidopsis	PF00069.20	Pkinase	Protein kinase domain	COG0515	Serine/threonine protein kinase	.	c46535_g2|m.12468	865-2013[+]	.	.	.	GO:0005524|ATP binding;GO:0005509|calcium ion binding;GO:0004672|protein kinase activity;GO:0004674|protein serine/threonine kinase activity	GO:0005886|plasma membrane	K13412|CPK; calcium-dependent protein kinase [EC:2.7.11.1]	map04626|Plant-pathogen interaction;map05145|Toxoplasmosis
c52306_g2	0.405147	-1.30348	5.27314e-05	0.00226778	down	yes	gi|145358833|ref|NM_123774.3|	469	0	Arabidopsis thaliana glutathione gamma-glutamylcysteinyltransferase 1 mRNA, complete cds	gi|297794999|ref|XP_002865384.1|	901	9e-115	hypothetical protein ARALYDRAFT_917217 [Arabidopsis lyrata subsp. lyrata]	sp|Q9S7Z3|PCS1_ARATH	349	E:5e-115	RecName: Full=Glutathione gamma-glutamylcysteinyltransferase 1;^Eukaryota; Viridiplantae; Streptophyta; Embryophyta; Tracheophyta; Spermatophyta; Magnoliophyta; eudicotyledons; core eudicotyledons; rosids; malvids; Brassicales; Brassicaceae; Camelineae; Arabidopsis	sp|Q9S7Z3|PCS1_ARATH	374	E:5e-127	RecName: Full=Glutathione gamma-glutamylcysteinyltransferase 1;^Eukaryota; Viridiplantae; Streptophyta; Embryophyta; Tracheophyta; Spermatophyta; Magnoliophyta; eudicotyledons; core eudicotyledons; rosids; malvids; Brassicales; Brassicaceae; Camelineae; Arabidopsis	PF09328.5	Phytochelatin_C	Domain of unknown function (DUF1984)	NOG76926	Phytochelatin synthase	.	c52306_g2|m.14442	376-1032[-]	.	.	GO:0015700|arsenite transport;GO:0052544|defense response by callose deposition in cell wall;GO:0042742|defense response to bacterium;GO:0042344|indole glucosinolate catabolic process;GO:0046938|phytochelatin biosynthetic process;GO:0046685|response to arsenic-containing substance;GO:0046686|response to cadmium ion	GO:0015446|arsenite-transmembrane transporting ATPase activity;GO:0046870|cadmium ion binding;GO:0005507|copper ion binding;GO:0016756|glutathione gamma-glutamylcysteinyltransferase activity;GO:0071992|phytochelatin transmembrane transporter activity	GO:0005829|cytosol	K05941|E2.3.2.15; glutathione gamma-glutamylcysteinyltransferase [EC:2.3.2.15]	.
c42048_g1	4.20186	2.07103	0.00506783	0.0452412	up	yes	gi|297825180|ref|XM_002880427.1|	438	0	Arabidopsis lyrata subsp. lyrata hypothetical protein, mRNA	gi|674240010|gb|KFK32775.1|	611	4e-154	hypothetical protein AALP_AA6G287000 [Arabis alpina]	sp|O64812|SRK2J_ARATH	236	E:3e-154	RecName: Full=Serine/threonine-protein kinase SRK2J;^Eukaryota; Viridiplantae; Streptophyta; Embryophyta; Tracheophyta; Spermatophyta; Magnoliophyta; eudicotyledons; core eudicotyledons; rosids; malvids; Brassicales; Brassicaceae; Camelineae; Arabidopsis`sp|O64812|SRK2J_ARATH	sp|O64812|SRK2J_ARATH	242	E:2e-78	RecName: Full=Serine/threonine-protein kinase SRK2J;^Eukaryota; Viridiplantae; Streptophyta; Embryophyta; Tracheophyta; Spermatophyta; Magnoliophyta; eudicotyledons; core eudicotyledons; rosids; malvids; Brassicales; Brassicaceae; Camelineae; Arabidopsis	PF00069.20	Pkinase	Protein kinase domain	COG0515	Serine/threonine protein kinase	.	c42048_g1|m.15046	797-1231[+]	.	.	GO:0006970|response to osmotic stress	GO:0005524|ATP binding;GO:0004674|protein serine/threonine kinase activity	.	K14498|SNRK2; serine/threonine-protein kinase SRK2 [EC:2.7.11.1]	map04075|Plant hormone signal transduction
c42048_g1	4.20186	2.07103	0.00506783	0.0452412	up	yes	gi|297825180|ref|XM_002880427.1|	438	0	Arabidopsis lyrata subsp. lyrata hypothetical protein, mRNA	gi|674240010|gb|KFK32775.1|	611	4e-154	hypothetical protein AALP_AA6G287000 [Arabis alpina]	sp|O64812|SRK2J_ARATH	236	E:3e-154	RecName: Full=Serine/threonine-protein kinase SRK2J;^Eukaryota; Viridiplantae; Streptophyta; Embryophyta; Tracheophyta; Spermatophyta; Magnoliophyta; eudicotyledons; core eudicotyledons; rosids; malvids; Brassicales; Brassicaceae; Camelineae; Arabidopsis`sp|O64812|SRK2J_ARATH	sp|O64812|SRK2J_ARATH	195	E:5e-61	RecName: Full=Serine/threonine-protein kinase SRK2J;^Eukaryota; Viridiplantae; Streptophyta; Embryophyta; Tracheophyta; Spermatophyta; Magnoliophyta; eudicotyledons; core eudicotyledons; rosids; malvids; Brassicales; Brassicaceae; Camelineae; Arabidopsis	PF00069.20	Pkinase	Protein kinase domain	COG0515	Serine/threonine protein kinase	.	c42048_g1|m.15047	65-379[+]	.	.	GO:0006970|response to osmotic stress	GO:0005524|ATP binding;GO:0004674|protein serine/threonine kinase activity	.	K14498|SNRK2; serine/threonine-protein kinase SRK2 [EC:2.7.11.1]	map04075|Plant hormone signal transduction
c43647_g2	51.5625	5.68825	6.31225e-05	0.00256652	up	yes	gi|944841|emb|X80023.1|	297	3e-153	T.turgidum mRNA for ADP/ATP carrier	gi|729405457|ref|XP_010555116.1|	1277	3e-173	PREDICTED: ADP,ATP carrier protein 3, mitochondrial isoform X2 [Tarenaya hassleriana]	sp|P04709|ADT1_MAIZE	482	E:8e-169	RecName: Full=ADP,ATP carrier protein 1, mitochondrial;^Eukaryota; Viridiplantae; Streptophyta; Embryophyta; Tracheophyta; Spermatophyta; Magnoliophyta; Liliopsida; Poales; Poaceae; PACMAD clade; Panicoideae; Andropogoneae; Zea	sp|P04709|ADT1_MAIZE	515	E:0	RecName: Full=ADP,ATP carrier protein 1, mitochondrial;^Eukaryota; Viridiplantae; Streptophyta; Embryophyta; Tracheophyta; Spermatophyta; Magnoliophyta; Liliopsida; Poales; Poaceae; PACMAD clade; Panicoideae; Andropogoneae; Zea	PF00153.22	Mito_carr	Mitochondrial carrier protein	.	.	.	c43647_g2|m.15629	2-958[+]	.	ExpAA=97.31^PredHel=4^Topology=i13-32o122-144i185-207o222-244i	GO:0015865|purine nucleotide transport;GO:0055085|transmembrane transport	GO:0005507|copper ion binding;GO:0005215|transporter activity	GO:0005618|cell wall;GO:0009941|chloroplast envelope;GO:0016021|integral to membrane;GO:0005743|mitochondrial inner membrane;GO:0005730|nucleolus;GO:0005886|plasma membrane;GO:0005773|vacuole	K05863|SLC25A4S, ANT; solute carrier family 25 (mitochondrial adenine nucleotide translocator), member 4/5/6/31	map04022|cGMP-PKG signaling pathway;map04020|Calcium signaling pathway;map05016|Huntington's disease;map05166|HTLV-I infection;map05012|Parkinson's disease
c41814_g2	21.6822	4.43844	1.08821e-09	6.24974e-07	up	yes	gi|297793528|ref|XM_002864603.1|	265	7e-136	Arabidopsis lyrata subsp. lyrata heat shock protein 18, mRNA	gi|674234744|gb|KFK27509.1|	548	3e-69	hypothetical protein AALP_AA8G392500 [Arabis alpina]	sp|P19037|HS181_ARATH	210	E:2e-68	RecName: Full=18.1 kDa class I heat shock protein;^Eukaryota; Viridiplantae; Streptophyta; Embryophyta; Tracheophyta; Spermatophyta; Magnoliophyta; eudicotyledons; core eudicotyledons; rosids; malvids; Brassicales; Brassicaceae; Camelineae; Arabidopsis	sp|P13853|HS17C_ARATH	213	E:7e-70	RecName: Full=17.6 kDa class I heat shock protein 3;^Eukaryota; Viridiplantae; Streptophyta; Embryophyta; Tracheophyta; Spermatophyta; Magnoliophyta; eudicotyledons; core eudicotyledons; rosids; malvids; Brassicales; Brassicaceae; Camelineae; Arabidopsis	PF00011.16	HSP20	Hsp20/alpha crystallin family	COG0071	Molecular chaperone (small heat shock protein)	.	c41814_g2|m.16787	2-367[-]	.	.	GO:0006950|response to stress	.	GO:0005737|cytoplasm	K13993|HSP20; HSP20 family protein	map04141|Protein processing in endoplasmic reticulum
c36328_g1	2.05847	1.04157	0.000158242	0.00479896	up	yes	gi|567217023|ref|XM_006412078.1|	942	0	Eutrema salsugineum hypothetical protein (EUTSA_v10025258mg) mRNA, complete cds	gi|674237387|gb|KFK30152.1|	1920	0	hypothetical protein AALP_AA7G223600 [Arabis alpina]	sp|Q8N7N5|DCAF8_MOUSE	290	E:8e-87	RecName: Full=DDB1- and CUL4-associated factor 8;^Eukaryota; Metazoa; Chordata; Craniata; Vertebrata; Euteleostomi; Mammalia; Eutheria; Euarchontoglires; Glires; Rodentia; Sciurognathi; Muroidea; Muridae; Murinae; Mus; Mus	sp|Q8N7N5|DCAF8_MOUSE	293	E:5e-91	RecName: Full=DDB1- and CUL4-associated factor 8;^Eukaryota; Metazoa; Chordata; Craniata; Vertebrata; Euteleostomi; Mammalia; Eutheria; Euarchontoglires; Glires; Rodentia; Sciurognathi; Muroidea; Muridae; Murinae; Mus; Mus	PF00400.27	WD40	WD domain, G-beta repeat	COG2319	FOG: WD40 repeat	.	c36328_g1|m.16868	644-1969[-]	.	ExpAA=20.17^PredHel=1^Topology=i416-438o	GO:0016567|protein ubiquitination	.	GO:0080008|Cul4-RING ubiquitin ligase complex	K11804|WDR42A; WD repeat-containing protein 42A	.
c52389_g1	24.3205	4.6041	0.000125712	0.00416025	up	yes	gi|565435956|ref|XM_006281393.1|	690	0	Capsella rubella hypothetical protein (CARUB_v10027534mg) mRNA, complete cds	gi|567185125|ref|XP_006403149.1|	1539	0	hypothetical protein EUTSA_v10003137mg [Eutrema salsugineum]	sp|Q84JA6|CESA4_ARATH	593	E:0	RecName: Full=Cellulose synthase A catalytic subunit 4 [UDP-forming];^Eukaryota; Viridiplantae; Streptophyta; Embryophyta; Tracheophyta; Spermatophyta; Magnoliophyta; eudicotyledons; core eudicotyledons; rosids; malvids; Brassicales; Brassicaceae; Camelineae; Arabidopsis	sp|Q84JA6|CESA4_ARATH	420	E:8e-139	RecName: Full=Cellulose synthase A catalytic subunit 4 [UDP-forming];^Eukaryota; Viridiplantae; Streptophyta; Embryophyta; Tracheophyta; Spermatophyta; Magnoliophyta; eudicotyledons; core eudicotyledons; rosids; malvids; Brassicales; Brassicaceae; Camelineae; Arabidopsis	PF03552.9	Cellulose_synt	Cellulose synthase	COG1215	Glycosyltransferases, probably involved in cell wall biogenesis	.	c52389_g1|m.16871	300-911[+]	.	.	GO:0030244|cellulose biosynthetic process;GO:0042742|defense response to bacterium;GO:0050832|defense response to fungus;GO:0009834|secondary cell wall biogenesis	GO:0016760|cellulose synthase (UDP-forming) activity;GO:0046872|metal ion binding	GO:0016021|integral to membrane;GO:0005886|plasma membrane	K10999|CESA; cellulose synthase A [EC:2.4.1.12]	.
c40067_g1	2.03372	1.02412	0.00434355	0.0407552	up	yes	gi|567140172|ref|XM_006394928.1|	285	1e-146	Eutrema salsugineum hypothetical protein (EUTSA_v10003949mg) mRNA, complete cds	gi|2191184|gb|AAB61069.1|	831	3e-106	Similar to sodium/hydrogen exchanger; coded for by A. thaliana cDNA T75860 [Arabidopsis thaliana]	sp|Q68KI4|NHX1_ARATH	313	E:5e-102	RecName: Full=Sodium/hydrogen exchanger 1;^Eukaryota; Viridiplantae; Streptophyta; Embryophyta; Tracheophyta; Spermatophyta; Magnoliophyta; eudicotyledons; core eudicotyledons; rosids; malvids; Brassicales; Brassicaceae; Camelineae; Arabidopsis	sp|Q56XP4|NHX2_ARATH	220	E:5e-68	RecName: Full=Sodium/hydrogen exchanger 2;^Eukaryota; Viridiplantae; Streptophyta; Embryophyta; Tracheophyta; Spermatophyta; Magnoliophyta; eudicotyledons; core eudicotyledons; rosids; malvids; Brassicales; Brassicaceae; Camelineae; Arabidopsis	PF00999.16	Na_H_Exchanger	Sodium/hydrogen exchanger family	COG0025	NhaP-type Na+/H+ and K+/H+ antiporters	.	c40067_g1|m.17557	2-388[+]	.	ExpAA=73.71^PredHel=4^Topology=i2-24o34-56i63-85o105-127i	GO:0055075|potassium ion homeostasis;GO:0010107|potassium ion import;GO:0006885|regulation of pH;GO:0090333|regulation of stomatal closure	GO:0015386|potassium:hydrogen antiporter activity;GO:0015385|sodium:hydrogen antiporter activity	GO:0016021|integral to membrane;GO:0005774|vacuolar membrane	.	.
c40067_g1	2.03372	1.02412	0.00434355	0.0407552	up	yes	gi|567140172|ref|XM_006394928.1|	285	1e-146	Eutrema salsugineum hypothetical protein (EUTSA_v10003949mg) mRNA, complete cds	gi|2191184|gb|AAB61069.1|	831	3e-106	Similar to sodium/hydrogen exchanger; coded for by A. thaliana cDNA T75860 [Arabidopsis thaliana]	sp|Q68KI4|NHX1_ARATH	313	E:5e-102	RecName: Full=Sodium/hydrogen exchanger 1;^Eukaryota; Viridiplantae; Streptophyta; Embryophyta; Tracheophyta; Spermatophyta; Magnoliophyta; eudicotyledons; core eudicotyledons; rosids; malvids; Brassicales; Brassicaceae; Camelineae; Arabidopsis	sp|Q68KI4|NHX1_ARATH	172	E:2e-50	RecName: Full=Sodium/hydrogen exchanger 1;^Eukaryota; Viridiplantae; Streptophyta; Embryophyta; Tracheophyta; Spermatophyta; Magnoliophyta; eudicotyledons; core eudicotyledons; rosids; malvids; Brassicales; Brassicaceae; Camelineae; Arabidopsis	PF00999.16	Na_H_Exchanger	Sodium/hydrogen exchanger family	COG0025	NhaP-type Na+/H+ and K+/H+ antiporters	.	c40067_g1|m.17558	410-715[+]	.	ExpAA=37.07^PredHel=1^Topology=o55-77i	GO:0048366|leaf development;GO:0010351|lithium ion transport;GO:0055075|potassium ion homeostasis;GO:0006885|regulation of pH;GO:0090333|regulation of stomatal closure;GO:0009651|response to salt stress	GO:0015385|sodium:hydrogen antiporter activity	GO:0005789|endoplasmic reticulum membrane;GO:0000139|Golgi membrane;GO:0016021|integral to membrane;GO:0000325|plant-type vacuole;GO:0005886|plasma membrane;GO:0005774|vacuolar membrane	.	.
c49224_g1	12.417	3.63424	0.00212744	0.0255989	up	yes	gi|567202853|ref|XM_006408019.1|	1053	0	Eutrema salsugineum hypothetical protein (EUTSA_v10020688mg) mRNA, complete cds	gi|567202854|ref|XP_006408082.1|	2183	0	hypothetical protein EUTSA_v10020688mg [Eutrema salsugineum]	sp|Q8VZT3|EDL12_ARATH	810	E:0	RecName: Full=Sugar transporter ERD6-like 12;^Eukaryota; Viridiplantae; Streptophyta; Embryophyta; Tracheophyta; Spermatophyta; Magnoliophyta; eudicotyledons; core eudicotyledons; rosids; malvids; Brassicales; Brassicaceae; Camelineae; Arabidopsis	sp|Q8VZT3|EDL12_ARATH	810	E:0	RecName: Full=Sugar transporter ERD6-like 12;^Eukaryota; Viridiplantae; Streptophyta; Embryophyta; Tracheophyta; Spermatophyta; Magnoliophyta; eudicotyledons; core eudicotyledons; rosids; malvids; Brassicales; Brassicaceae; Camelineae; Arabidopsis	PF07690.11	MFS_1	Major Facilitator Superfamily	COG0477	Permeases of the major facilitator superfamily	.	c49224_g1|m.19866	122-1510[-]	.	ExpAA=253.53^PredHel=12^Topology=i25-47o62-84i96-113o123-142i149-171o176-198i258-280o295-317i324-346o361-383i396-418o423-445i	GO:0008643|carbohydrate transport	GO:0022891|substrate-specific transmembrane transporter activity	GO:0016021|integral to membrane	.	.
c49268_g1	4.95891	2.31002	0.00533208	0.0468717	up	yes	gi|567136136|ref|XM_006393808.1|	1182	0	Eutrema salsugineum hypothetical protein (EUTSA_v10003684mg) mRNA, complete cds	gi|567136137|ref|XP_006393870.1|	2471	0	hypothetical protein EUTSA_v10003684mg [Eutrema salsugineum]	sp|Q9XFH4|DDM1_ARATH	936	E:0	RecName: Full=ATP-dependent DNA helicase DDM1;^Eukaryota; Viridiplantae; Streptophyta; Embryophyta; Tracheophyta; Spermatophyta; Magnoliophyta; eudicotyledons; core eudicotyledons; rosids; malvids; Brassicales; Brassicaceae; Camelineae; Arabidopsis`sp|Q9XFH4|DDM1_ARATH	sp|Q9XFH4|DDM1_ARATH	958	E:0	RecName: Full=ATP-dependent DNA helicase DDM1;^Eukaryota; Viridiplantae; Streptophyta; Embryophyta; Tracheophyta; Spermatophyta; Magnoliophyta; eudicotyledons; core eudicotyledons; rosids; malvids; Brassicales; Brassicaceae; Camelineae; Arabidopsis	PF00176.18	SNF2_N	SNF2 family N-terminal domain	COG0553	Superfamily II DNA/RNA helicases, SNF2 family	.	c49268_g1|m.19998	32-1702[+]	.	.	GO:0009294|DNA mediated transformation;GO:0006344|maintenance of chromatin silencing;GO:0006346|methylation-dependent chromatin silencing;GO:0090241|negative regulation of histone H4 acetylation;GO:0051574|positive regulation of histone H3-K9 methylation;GO:0044030|regulation of DNA methylation;GO:0006349|regulation of gene expression by genetic imprinting;GO:0006351|transcription, DNA-dependent;…	GO:0005524|ATP binding;GO:0004003|ATP-dependent DNA helicase activity;GO:0003677|DNA binding	GO:0000786|nucleosome;GO:0005634|nucleus	K19001|HELLS, DDM1; ATP-dependent DNA helicase	.
c48436_g1	14.7988	3.88741	0.000395854	0.008744	up	yes	gi|567186131|ref|XM_006403367.1|	1174	0	Eutrema salsugineum hypothetical protein (EUTSA_v10010241mg) mRNA, complete cds	gi|565465853|ref|XP_006290818.1|	2520	0	hypothetical protein CARUB_v10016923mg [Capsella rubella]	sp|Q93ZY2|ROGF1_ARATH	448	E:1e-147	RecName: Full=Rop guanine nucleotide exchange factor 1;^Eukaryota; Viridiplantae; Streptophyta; Embryophyta; Tracheophyta; Spermatophyta; Magnoliophyta; eudicotyledons; core eudicotyledons; rosids; malvids; Brassicales; Brassicaceae; Camelineae; Arabidopsis	sp|Q93ZY2|ROGF1_ARATH	448	E:9e-149	RecName: Full=Rop guanine nucleotide exchange factor 1;^Eukaryota; Viridiplantae; Streptophyta; Embryophyta; Tracheophyta; Spermatophyta; Magnoliophyta; eudicotyledons; core eudicotyledons; rosids; malvids; Brassicales; Brassicaceae; Camelineae; Arabidopsis	PF03759.8	PRONE	PRONE (Plant-specific Rop nucleotide exchanger)	NOG263269	RALBP1 associated Eps domain containing protein	.	c48436_g1|m.20176	3-1886[+]	.	ExpAA=17.58^PredHel=1^Topology=i23-45o	GO:0009860|pollen tube growth;GO:0080092|regulation of pollen tube growth	GO:0005089|Rho guanyl-nucleotide exchange factor activity	GO:0016324|apical plasma membrane	.	.
c50428_g1	4.07747	2.02767	0.0040822	0.0391559	up	yes	gi|567154927|ref|XM_006417859.1|	677	0	Eutrema salsugineum hypothetical protein (EUTSA_v10006971mg) mRNA, complete cds	gi|567154925|ref|XP_006417921.1|	1165	3e-151	hypothetical protein EUTSA_v10006971mg [Eutrema salsugineum]	sp|Q8W585|FTSH8_ARATH	427	E:1e-142	RecName: Full=ATP-dependent zinc metalloprotease FTSH 8, chloroplastic;^Eukaryota; Viridiplantae; Streptophyta; Embryophyta; Tracheophyta; Spermatophyta; Magnoliophyta; eudicotyledons; core eudicotyledons; rosids; malvids; Brassicales; Brassicaceae; Camelineae; Arabidopsis	sp|Q8W585|FTSH8_ARATH	504	E:1e-173	RecName: Full=ATP-dependent zinc metalloprotease FTSH 8, chloroplastic;^Eukaryota; Viridiplantae; Streptophyta; Embryophyta; Tracheophyta; Spermatophyta; Magnoliophyta; eudicotyledons; core eudicotyledons; rosids; malvids; Brassicales; Brassicaceae; Camelineae; Arabidopsis	PF06480.10	FtsH_ext	FtsH Extracellular	COG0465	ATP-dependent Zn proteases	.	c50428_g1|m.20456	209-1117[+]	.	.	GO:0007275|multicellular organismal development;GO:0006508|proteolysis;GO:0010304|PSII associated light-harvesting complex II catabolic process	GO:0005524|ATP binding;GO:0004176|ATP-dependent peptidase activity;GO:0046872|metal ion binding;GO:0004222|metalloendopeptidase activity;GO:0008270|zinc ion binding	GO:0009941|chloroplast envelope;GO:0009535|chloroplast thylakoid membrane;GO:0016021|integral to membrane	K03798|ftsH, hflB; cell division protease FtsH [EC:3.4.24.-]	.
c50018_g2	4.99212	2.31965	0.000277635	0.00695147	up	yes	gi|567136587|ref|XM_006393933.1|	723	0	Eutrema salsugineum hypothetical protein (EUTSA_v10003584mg) mRNA, complete cds	gi|297794179|ref|XP_002864974.1|	1635	0	hypothetical protein ARALYDRAFT_496807 [Arabidopsis lyrata subsp. lyrata]	sp|O49545|BAME1_ARATH	633	E:0	RecName: Full=Leucine-rich repeat receptor-like serine/threonine-protein kinase BAM1;^Eukaryota; Viridiplantae; Streptophyta; Embryophyta; Tracheophyta; Spermatophyta; Magnoliophyta; eudicotyledons; core eudicotyledons; rosids; malvids; Brassicales; Brassicaceae; Camelineae; Arabidopsis`sp|O49545|BAME1_ARATH	sp|O49545|BAME1_ARATH	687	E:0	RecName: Full=Leucine-rich repeat receptor-like serine/threonine-protein kinase BAM1;^Eukaryota; Viridiplantae; Streptophyta; Embryophyta; Tracheophyta; Spermatophyta; Magnoliophyta; eudicotyledons; core eudicotyledons; rosids; malvids; Brassicales; Brassicaceae; Camelineae; Arabidopsis`sp|O49545|BAME1_ARATH	PF08263.7	LRRNT_2	Leucine rich repeat N-terminal domain	COG4886	Leucine-rich repeat (LRR) protein	.	c50018_g2|m.20739	2-1177[-]	sigP:1^15^0.86^YES	.	GO:0048229|gametophyte development;GO:0010480|microsporocyte differentiation;GO:0010075|regulation of meristem growth;GO:0009934|regulation of meristem structural organization	GO:0005524|ATP binding;GO:0043621|protein self-association;GO:0004674|protein serine/threonine kinase activity	GO:0016021|integral to membrane;GO:0005886|plasma membrane	.	.
c49838_g2	8.11992	3.02146	1.88761e-07	3.77071e-05	up	yes	gi|567131159|ref|XM_006392555.1|	1913	0	Eutrema salsugineum hypothetical protein (EUTSA_v10011192mg) mRNA, complete cds	gi|567131160|ref|XP_006392617.1|	4641	0	hypothetical protein EUTSA_v10011192mg [Eutrema salsugineum]	sp|Q9ZWC8|BRL1_ARATH	1773	E:0	RecName: Full=Serine/threonine-protein kinase BRI1-like 1;^Eukaryota; Viridiplantae; Streptophyta; Embryophyta; Tracheophyta; Spermatophyta; Magnoliophyta; eudicotyledons; core eudicotyledons; rosids; malvids; Brassicales; Brassicaceae; Camelineae; Arabidopsis	sp|Q9ZWC8|BRL1_ARATH	1954	E:0	RecName: Full=Serine/threonine-protein kinase BRI1-like 1;^Eukaryota; Viridiplantae; Streptophyta; Embryophyta; Tracheophyta; Spermatophyta; Magnoliophyta; eudicotyledons; core eudicotyledons; rosids; malvids; Brassicales; Brassicaceae; Camelineae; Arabidopsis	PF08263.7	LRRNT_2	Leucine rich repeat N-terminal domain	COG4886	Leucine-rich repeat (LRR) protein	.	c49838_g2|m.21519	275-3751[-]	sigP:1^23^0.906^YES	ExpAA=43.17^PredHel=1^Topology=o777-799i	.	GO:0005524|ATP binding;GO:0004674|protein serine/threonine kinase activity;GO:0005496|steroid binding	GO:0016021|integral to membrane;GO:0005886|plasma membrane	.	.
c48118_g1	11.2113	3.48688	0.0027649	0.030516	up	yes	gi|567151316|ref|XM_006416830.1|	823	0	Eutrema salsugineum hypothetical protein (EUTSA_v10007623mg) mRNA, complete cds	gi|567151317|ref|XP_006416893.1|	1856	0	hypothetical protein EUTSA_v10007623mg [Eutrema salsugineum]	sp|Q38819|CCA23_ARATH	691	E:0	RecName: Full=Cyclin-A2-3;^Eukaryota; Viridiplantae; Streptophyta; Embryophyta; Tracheophyta; Spermatophyta; Magnoliophyta; eudicotyledons; core eudicotyledons; rosids; malvids; Brassicales; Brassicaceae; Camelineae; Arabidopsis	sp|Q38819|CCA23_ARATH	723	E:0	RecName: Full=Cyclin-A2-3;^Eukaryota; Viridiplantae; Streptophyta; Embryophyta; Tracheophyta; Spermatophyta; Magnoliophyta; eudicotyledons; core eudicotyledons; rosids; malvids; Brassicales; Brassicaceae; Camelineae; Arabidopsis	PF00134.18	Cyclin_N	Cyclin, N-terminal domain	COG5024	Cyclin	.	c48118_g1|m.22151	373-1899[-]	.	.	GO:0051301|cell division;GO:0008283|cell proliferation;GO:0042023|DNA endoreduplication;GO:0010311|lateral root formation;GO:2000123|positive regulation of stomatal complex development;GO:0000079|regulation of cyclin-dependent protein kinase activity;GO:0010389|regulation of G2/M transition of mitotic cell cycle	.	GO:0005634|nucleus	K06627|CCNA; cyclin A	map04152|AMPK signaling pathway;map05203|Viral carcinogenesis;map04110|Cell cycle;map05161|Hepatitis B;map05169|Epstein-Barr virus infection;map04914|Progesterone-mediated oocyte maturation
c43871_g4	0.33077	-1.5961	6.77269e-09	3.11171e-06	down	yes	gi|620598306|gb|KJ461445.1|	1868	0	Brassica juncea var. tumida mitochondrion, complete genome	gi|567221566|ref|XP_006414412.1|	1625	0	hypothetical protein EUTSA_v10025488mg [Eutrema salsugineum]	sp|Q36284|NU5M_MAIZE	251	E:1e-74	RecName: Full=NADH-ubiquinone oxidoreductase chain 5;^Eukaryota; Viridiplantae; Streptophyta; Embryophyta; Tracheophyta; Spermatophyta; Magnoliophyta; Liliopsida; Poales; Poaceae; PACMAD clade; Panicoideae; Andropogoneae; Zea`sp|Q36284|NU5M_MAIZE	sp|Q6Q2C2|HYES_PIG	169	E:2e-45	RecName: Full=Bifunctional epoxide hydrolase 2;^Eukaryota; Metazoa; Chordata; Craniata; Vertebrata; Euteleostomi; Mammalia; Eutheria; Laurasiatheria; Cetartiodactyla; Suina; Suidae; Sus	PF12697.2	Abhydrolase_6	Alpha/beta hydrolase family	COG0596	Predicted hydrolases or acyltransferases (alpha/beta hydrolase superfamily)	.	c43871_g4|m.22339	2729-3880[-]	sigP:1^10^0.458^YES	.	GO:0019439|aromatic compound catabolic process;GO:0046839|phospholipid dephosphorylation;GO:0009636|response to toxin	GO:0033885|10-hydroxy-9-(phosphonooxy)octadecanoate phosphatase activity;GO:0004301|epoxide hydrolase activity;GO:0042577|lipid phosphatase activity;GO:0000287|magnesium ion binding	GO:0005777|peroxisome	.	.
c48129_g1	18.0564	4.17444	8.06161e-09	3.58443e-06	up	yes	gi|567179042|ref|XM_006401419.1|	881	0	Eutrema salsugineum hypothetical protein (EUTSA_v10013478mg) mRNA, complete cds	gi|685271931|ref|XP_009127019.1|	2004	0	PREDICTED: glucan endo-1,3-beta-glucosidase 13-like isoform X1 [Brassica rapa]	sp|Q9FJU9|E1313_ARATH	356	E:7e-113	RecName: Full=Glucan endo-1,3-beta-glucosidase 13;^Eukaryota; Viridiplantae; Streptophyta; Embryophyta; Tracheophyta; Spermatophyta; Magnoliophyta; eudicotyledons; core eudicotyledons; rosids; malvids; Brassicales; Brassicaceae; Camelineae; Arabidopsis	sp|Q9FJU9|E1313_ARATH	371	E:3e-121	RecName: Full=Glucan endo-1,3-beta-glucosidase 13;^Eukaryota; Viridiplantae; Streptophyta; Embryophyta; Tracheophyta; Spermatophyta; Magnoliophyta; eudicotyledons; core eudicotyledons; rosids; malvids; Brassicales; Brassicaceae; Camelineae; Arabidopsis	PF00332.13	Glyco_hydro_17	Glycosyl hydrolases family 17	NOG259646	Ubiquitin associated domain-containing protein	.	c48129_g1|m.22768	571-2022[-]	.	ExpAA=22.76^PredHel=1^Topology=i7-29o	GO:0005975|carbohydrate metabolic process;GO:0006952|defense response	GO:0043169|cation binding;GO:0042973|glucan endo-1,3-beta-D-glucosidase activity	GO:0046658|anchored to plasma membrane;GO:0005576|extracellular region;GO:0009505|plant-type cell wall	.	.
c43082_g1	59.9649	5.90605	1.51776e-05	0.000946606	up	yes	gi|567152426|ref|XM_006417140.1|	1118	0	Eutrema salsugineum hypothetical protein (EUTSA_v10007534mg) mRNA, complete cds	gi|567152427|ref|XP_006417203.1|	2276	0	hypothetical protein EUTSA_v10007534mg [Eutrema salsugineum]	sp|Q7XU38|C87A3_ORYSJ	580	E:0	RecName: Full=Cytochrome P450 87A3;^Eukaryota; Viridiplantae; Streptophyta; Embryophyta; Tracheophyta; Spermatophyta; Magnoliophyta; Liliopsida; Poales; Poaceae; BEP clade; Ehrhartoideae; Oryzeae; Oryza	sp|Q7XU38|C87A3_ORYSJ	582	E:0	RecName: Full=Cytochrome P450 87A3;^Eukaryota; Viridiplantae; Streptophyta; Embryophyta; Tracheophyta; Spermatophyta; Magnoliophyta; Liliopsida; Poales; Poaceae; BEP clade; Ehrhartoideae; Oryzeae; Oryza	PF00067.17	p450	Cytochrome P450	COG2124	Cytochrome P450	.	c43082_g1|m.22853	302-1819[-]	sigP:1^21^0.904^YES	ExpAA=24.74^PredHel=1^Topology=i2-21o	.	GO:0009055|electron carrier activity;GO:0020037|heme binding;GO:0005506|iron ion binding;GO:0004497|monooxygenase activity;GO:0016705|oxidoreductase activity, acting on paired donors, with incorporation or reduction of molecular oxygen	GO:0030659|cytoplasmic vesicle membrane;GO:0016021|integral to membrane	.	.
c52318_g1	4.89904	2.2925	0.000243316	0.00632439	up	yes	gi|297823912|ref|XM_002879793.1|	3063	0	Arabidopsis lyrata subsp. lyrata NRPD1b, mRNA	gi|297823913|ref|XP_002879839.1|	7029	0	NRPD1b [Arabidopsis lyrata subsp. lyrata]	sp|Q5D869|NRPE1_ARATH	2667	E:0	RecName: Full=DNA-directed RNA polymerase E subunit 1;^Eukaryota; Viridiplantae; Streptophyta; Embryophyta; Tracheophyta; Spermatophyta; Magnoliophyta; eudicotyledons; core eudicotyledons; rosids; malvids; Brassicales; Brassicaceae; Camelineae; Arabidopsis	sp|Q5D869|NRPE1_ARATH	2729	E:0	RecName: Full=DNA-directed RNA polymerase E subunit 1;^Eukaryota; Viridiplantae; Streptophyta; Embryophyta; Tracheophyta; Spermatophyta; Magnoliophyta; eudicotyledons; core eudicotyledons; rosids; malvids; Brassicales; Brassicaceae; Camelineae; Arabidopsis	PF04997.7	RNA_pol_Rpb1_1	RNA polymerase Rpb1, domain 1	COG0086	DNA-directed RNA polymerase, beta' subunit/160 kD subunit	.	c52318_g1|m.23697	3-4679[-]	.	.	GO:0009308|amine metabolic process;GO:0006306|DNA methylation;GO:0030422|production of siRNA involved in RNA interference;GO:0006355|regulation of transcription, DNA-dependent;GO:0006351|transcription, DNA-dependent	GO:0005507|copper ion binding;GO:0003677|DNA binding;GO:0003899|DNA-directed RNA polymerase activity;GO:0048038|quinone binding	GO:0000418|DNA-directed RNA polymerase IV complex;GO:0000419|DNA-directed RNA polymerase V complex;GO:0016604|nuclear body;GO:0005730|nucleolus	K16251|NRPE1; DNA-directed RNA polymerase V subunit 1 [EC:2.7.7.6]	.
c45631_g1	39.9287	5.31935	0.000174879	0.00512317	up	yes	gi|567146128|ref|XM_006415369.1|	924	0	Eutrema salsugineum hypothetical protein (EUTSA_v10009705mg) mRNA, complete cds	gi|567146129|ref|XP_006415432.1|	2398	0	hypothetical protein EUTSA_v10009705mg [Eutrema salsugineum]	sp|Q9SVG4|RETOL_ARATH	445	E:2e-147	RecName: Full=Reticuline oxidase-like protein;^Eukaryota; Viridiplantae; Streptophyta; Embryophyta; Tracheophyta; Spermatophyta; Magnoliophyta; eudicotyledons; core eudicotyledons; rosids; malvids; Brassicales; Brassicaceae; Camelineae; Arabidopsis	sp|Q9SVG4|RETOL_ARATH	444	E:4e-148	RecName: Full=Reticuline oxidase-like protein;^Eukaryota; Viridiplantae; Streptophyta; Embryophyta; Tracheophyta; Spermatophyta; Magnoliophyta; eudicotyledons; core eudicotyledons; rosids; malvids; Brassicales; Brassicaceae; Camelineae; Arabidopsis	PF01565.18	FAD_binding_4	FAD binding domain	COG0277	FAD/FMN-containing dehydrogenases	.	c45631_g1|m.24559	3-1628[+]	sigP:1^34^0.641^YES	.	GO:0006979|response to oxidative stress	GO:0050660|flavin adenine dinucleotide binding;GO:0008762|UDP-N-acetylmuramate dehydrogenase activity	GO:0031225|anchored to membrane;GO:0048046|apoplast;GO:0005829|cytosol;GO:0005739|mitochondrion;GO:0009505|plant-type cell wall;GO:0005886|plasma membrane;GO:0009506|plasmodesma;GO:0005773|vacuole	.	.
c52273_g4	6.72531	2.7496	2.1879e-06	0.000218528	up	yes	gi|145359066|ref|NM_124378.5|	540	0	Arabidopsis thaliana xanthine/uracil permease family protein mRNA, complete cds	gi|22327675|ref|NP_199810.2|	1069	3e-141	xanthine/uracil permease family protein [Arabidopsis thaliana]	sp|Q8RWE9|NAT5_ARATH	416	E:2e-142	RecName: Full=Nucleobase-ascorbate transporter 5;^Eukaryota; Viridiplantae; Streptophyta; Embryophyta; Tracheophyta; Spermatophyta; Magnoliophyta; eudicotyledons; core eudicotyledons; rosids; malvids; Brassicales; Brassicaceae; Camelineae; Arabidopsis	sp|Q8RWE9|NAT5_ARATH	420	E:3e-144	RecName: Full=Nucleobase-ascorbate transporter 5;^Eukaryota; Viridiplantae; Streptophyta; Embryophyta; Tracheophyta; Spermatophyta; Magnoliophyta; eudicotyledons; core eudicotyledons; rosids; malvids; Brassicales; Brassicaceae; Camelineae; Arabidopsis	PF00860.15	Xan_ur_permease	Permease family	COG2233	Xanthine/uracil permeases	.	c52273_g4|m.24744	2-697[+]	.	ExpAA=131.42^PredHel=6^Topology=o5-22i34-53o58-77i98-120o143-165i178-200o	GO:0055085|transmembrane transport	GO:0005215|transporter activity	GO:0016021|integral to membrane;GO:0009506|plasmodesma	.	.
c51864_g1	10.6494	3.4127	0.00489576	0.0440906	up	yes	gi|567198432|ref|XM_006406784.1|	647	0	Eutrema salsugineum hypothetical protein (EUTSA_v10021943mg) mRNA, complete cds	gi|567198433|ref|XP_006406847.1|	2211	0	hypothetical protein EUTSA_v10021943mg [Eutrema salsugineum]	sp|Q06AN9|CD27A_ARATH	817	E:0	RecName: Full=Cell division cycle protein 27 homolog A;^Eukaryota; Viridiplantae; Streptophyta; Embryophyta; Tracheophyta; Spermatophyta; Magnoliophyta; eudicotyledons; core eudicotyledons; rosids; malvids; Brassicales; Brassicaceae; Camelineae; Arabidopsis	sp|Q06AN9|CD27A_ARATH	845	E:0	RecName: Full=Cell division cycle protein 27 homolog A;^Eukaryota; Viridiplantae; Streptophyta; Embryophyta; Tracheophyta; Spermatophyta; Magnoliophyta; eudicotyledons; core eudicotyledons; rosids; malvids; Brassicales; Brassicaceae; Camelineae; Arabidopsis	PF12895.2	Apc3	Anaphase-promoting complex, cyclosome, subunit 3	COG0457	FOG: TPR repeat	.	c51864_g1|m.24960	177-1808[+]	.	.	GO:0051301|cell division;GO:0007276|gamete generation;GO:0007067|mitosis;GO:0016567|protein ubiquitination;GO:0051302|regulation of cell division;GO:0051510|regulation of unidimensional cell growth	.	GO:0005680|anaphase-promoting complex	K03350|APC3, CDC27; anaphase-promoting complex subunit 3	map04110|Cell cycle;map04113|Meiosis - yeast;map05166|HTLV-I infection;map04111|Cell cycle - yeast;map04114|Oocyte meiosis;map04120|Ubiquitin mediated proteolysis;map04914|Progesterone-mediated oocyte maturation
c51923_g3	2.33659	1.22441	0.000179102	0.00520812	up	yes	gi|565451469|ref|XM_006285980.1|	386	0	Capsella rubella hypothetical protein (CARUB_v10007571mg) mRNA, complete cds	gi|567219204|ref|XP_006413231.1|	972	1e-124	hypothetical protein EUTSA_v10025148mg [Eutrema salsugineum]	sp|P42158|KC1D_ARATH	374	E:5e-124	RecName: Full=Casein kinase I isoform delta-like;^Eukaryota; Viridiplantae; Streptophyta; Embryophyta; Tracheophyta; Spermatophyta; Magnoliophyta; eudicotyledons; core eudicotyledons; rosids; malvids; Brassicales; Brassicaceae; Camelineae; Arabidopsis`sp|P42158|KC1D_ARATH	sp|P42158|KC1D_ARATH	278	E:2e-91	RecName: Full=Casein kinase I isoform delta-like;^Eukaryota; Viridiplantae; Streptophyta; Embryophyta; Tracheophyta; Spermatophyta; Magnoliophyta; eudicotyledons; core eudicotyledons; rosids; malvids; Brassicales; Brassicaceae; Camelineae; Arabidopsis	PF00069.20	Pkinase	Protein kinase domain	COG0515	Serine/threonine protein kinase	.	c51923_g3|m.24976	1-402[-]	.	.	.	GO:0005524|ATP binding;GO:0004674|protein serine/threonine kinase activity	GO:0005737|cytoplasm;GO:0009506|plasmodesma	K02218|CSNK1, CK1; casein kinase 1 [EC:2.7.11.1]	map04340|Hedgehog signaling pathway
c51917_g2	4.05252	2.01882	0.00411073	0.0393065	up	yes	gi|332002898|gb|CP002688.1|	245	2e-124	Arabidopsis thaliana chromosome 5 sequence	gi|297806075|ref|XP_002870921.1|	633	9e-78	hypothetical protein ARALYDRAFT_486934 [Arabidopsis lyrata subsp. lyrata]	sp|A8MXD5|GRCR1_HUMAN	84.7	E:2e-18	RecName: Full=Glutaredoxin domain-containing cysteine-rich protein 1;^Eukaryota; Metazoa; Chordata; Craniata; Vertebrata; Euteleostomi; Mammalia; Eutheria; Euarchontoglires; Primates; Haplorrhini; Catarrhini; Hominidae; Homo	sp|A8MXD5|GRCR1_HUMAN	92	E:2e-21	RecName: Full=Glutaredoxin domain-containing cysteine-rich protein 1;^Eukaryota; Metazoa; Chordata; Craniata; Vertebrata; Euteleostomi; Mammalia; Eutheria; Euarchontoglires; Primates; Haplorrhini; Catarrhini; Hominidae; Homo	PF00462.19	Glutaredoxin	Glutaredoxin	NOG114644	Protein disulfide oxidoreductase	.	c51917_g2|m.25019	145-615[-]	.	.	GO:0042491|auditory receptor cell differentiation;GO:0045454|cell redox homeostasis;GO:0060122|inner ear receptor stereocilium organization;GO:0010923|negative regulation of phosphatase activity;GO:0048563|post-embryonic organ morphogenesis;GO:0007605|sensory perception of sound;GO:0060118|vestibular receptor cell development	GO:0009055|electron carrier activity;GO:0015035|protein disulfide oxidoreductase activity	GO:0060091|kinocilium;GO:0032420|stereocilium	K17479|GRXCR1; glutaredoxin domain-containing cysteine-rich protein 1	.
c38874_g1	8.29662	3.05252	0.000236777	0.00622233	up	yes	gi|297796592|ref|XM_002866135.1|	328	2e-170	Arabidopsis lyrata subsp. lyrata coatomer subunit beta-1, mRNA	gi|297796593|ref|XP_002866181.1|	707	3e-82	coatomer subunit beta-1 [Arabidopsis lyrata subsp. lyrata]	sp|Q9SV21|COPB1_ARATH	246	E:3e-72	RecName: Full=Coatomer subunit beta-1;^Eukaryota; Viridiplantae; Streptophyta; Embryophyta; Tracheophyta; Spermatophyta; Magnoliophyta; eudicotyledons; core eudicotyledons; rosids; malvids; Brassicales; Brassicaceae; Camelineae; Arabidopsis	sp|Q9SV21|COPB1_ARATH	246	E:6e-75	RecName: Full=Coatomer subunit beta-1;^Eukaryota; Viridiplantae; Streptophyta; Embryophyta; Tracheophyta; Spermatophyta; Magnoliophyta; eudicotyledons; core eudicotyledons; rosids; malvids; Brassicales; Brassicaceae; Camelineae; Arabidopsis	PF01602.15	Adaptin_N	Adaptin N terminal region	COG5096	Vesicle coat complex, various subunits	.	c38874_g1|m.25054	3-476[-]	.	.	GO:0006886|intracellular protein transport;GO:0016192|vesicle-mediated transport	GO:0005198|structural molecule activity	GO:0030126|COPI vesicle coat	K17301|COPB1, SEC26; coatomer, subunit beta	.
c50048_g1	9.01588	3.17247	0.000585903	0.0111497	up	yes	gi|567142573|ref|XM_006395586.1|	1383	0	Eutrema salsugineum hypothetical protein (EUTSA_v10003811mg) mRNA, complete cds	gi|727441836|ref|XP_010502426.1|	2990	0	PREDICTED: protein NSP-INTERACTING KINASE 2 [Camelina sativa]	sp|Q8RY65|NIK2_ARATH	1126	E:0	RecName: Full=Protein NSP-INTERACTING KINASE 2;^Eukaryota; Viridiplantae; Streptophyta; Embryophyta; Tracheophyta; Spermatophyta; Magnoliophyta; eudicotyledons; core eudicotyledons; rosids; malvids; Brassicales; Brassicaceae; Camelineae; Arabidopsis	sp|Q8RY65|NIK2_ARATH	1153	E:0	RecName: Full=Protein NSP-INTERACTING KINASE 2;^Eukaryota; Viridiplantae; Streptophyta; Embryophyta; Tracheophyta; Spermatophyta; Magnoliophyta; eudicotyledons; core eudicotyledons; rosids; malvids; Brassicales; Brassicaceae; Camelineae; Arabidopsis	PF08263.7	LRRNT_2	Leucine rich repeat N-terminal domain	COG0515	Serine/threonine protein kinase	.	c50048_g1|m.25299	159-2054[-]	.	ExpAA=32.06^PredHel=1^Topology=i250-272o	GO:0006952|defense response;GO:0019048|virus-host interaction	GO:0005524|ATP binding;GO:0004674|protein serine/threonine kinase activity	GO:0016021|integral to membrane;GO:0005886|plasma membrane	.	.
[truncated: 5,505 more rows]
