# Supplementary material for: Understanding the response in Pugionium cornutum (L.) Gaertn. seedling leaves under drought stress using transcriptome and proteome integrated analysis
Source: PeerJ. 2023 Apr 3;11:e15165. doi: 10.7717/peerj.15165 (PMC10078451; doi:10.7717/peerj.15165)
Supplement: Supplemental Information 6 [file peerj-11-15165-s006.xlsx]

## Sheet: Table. S6
Table. S6 DPs annotation in drought stress	Table. S6A DEPs in L2-L1
L2-L1
Accession	Description	Coverage	Unique Peptides	Peptides	PSMs	AAs	MW [kDa]	calc. pI	B-1/REF	B-2/REF	B-3/REF	average B	A-1/REF	A-2/REF	A-3/REF	average A	L2/L1	t test p value
c34978_g1	ORF type:internal; len:121 1-360 (-)	21.67	2	2	5	120	13.0952	5.45264	0.999819	1.46048	1.83805	1.43278	0.467645	0.507131	0.508593	0.494456	2.8977	0.0180625
c34220_g1	ORF type:complete; len:120 35-394 (+)	31.09	4	4	28	119	11.9188	8.44092	0.920519	1.72202	1.76615	1.46956	0.480285	0.482951	0.660296	0.541177	2.71549	0.0298905
c73841_g1	ORF type:complete; len:334 45-1046 (+)	2.1	1	1	2	333	37.5397	5.45264	0.875729	1.27201	1.77993	1.30922	0.505833	0.567935	0.562298	0.545355	2.40068	0.0436463
c37616_g1	ORF type:5prime_partial; len:153 2-460 (+)	36.18	2	2	5	152	16.1798	8.48486	1.23533	0.975092	1.72249	1.31097	0.466957	0.526507	0.818557	0.604007	2.17045	0.0445017
c33652_g1	ORF type:complete; len:113 178-516 (-)	11.61	1	1	2	112	11.3878	8.93896	1.00237	1.20276	1.47836	1.22783	0.611837	0.771397	0.564712	0.649315	1.89096	0.0187969
c42671_g1	ORF type:5prime_partial; len:166 2-499 (+)	4.24	1	1	2	165	18.1696	8.47021	1.4534	1.1634	0.881518	1.16611	0.464305	0.762374	0.68543	0.63737	1.82956	0.0479893
c6863_g2	ORF type:internal; len:191 3-572 (-)	3.68	1	1	1	190	20.2114	6.17627	0.972718	1.41089	1.16789	1.18383	0.632842	0.705575	0.671963	0.670127	1.76658	0.0161492
c39008_g1	ORF type:complete; len:534 434-2035 (+)	1.13	1	1	1	533	60.7532	8.41162	1.07556	0.981063	1.10089	1.05251	0.590945	0.769684	0.428031	0.59622	1.7653	0.0122724
c37995_g2	ORF type:internal; len:176 1-525 (-)	4	1	1	1	175	19.4628	9.48096	0.971195	1.22038	1.52271	1.23809	0.630413	0.733634	0.759229	0.707759	1.74932	0.0320078
c49280_g1	ORF type:complete; len:309 3245-4171 (-)	46.75	15	15	135	308	35.1623	9.51025	0.975598	0.925959	0.700653	0.867403	0.493633	0.440507	0.580511	0.504884	1.71803	0.0181521
c30518_g1	ORF type:complete; len:233 200-898 (+)	34.48	8	8	28	232	26.4714	6.82959	0.850444	0.93298	0.816078	0.866501	0.475498	0.541223	0.499994	0.505572	1.7139	0.000806687
c37668_g1	ORF type:5prime_partial; len:331 1-993 (+)	32.12	7	7	23	330	34.7618	5.5415	0.991116	1.00037	1.00088	0.997456	0.541949	0.593255	0.618501	0.584569	1.70631	5.41442e-05
c52085_g2	ORF type:3prime_partial; len:240 1-717 (-)	8.79	2	2	2	239	27.0883	9.1001	1.23092	1.18018	1.40832	1.27314	0.849809	0.610567	0.81944	0.759939	1.67532	0.00736866
c44697_g1	ORF type:complete; len:169 683-1189 (+)	6.55	1	1	3	168	17.3974	8.11865	1.00545	1.05222	1.4398	1.16582	0.563318	0.820999	0.709757	0.698025	1.67017	0.0404308
c40397_g1	ORF type:complete; len:382 182-1327 (+)	17.06	6	6	20	381	41.4955	9.05615	1.41155	1.12244	1.12492	1.21964	0.59033	0.996845	0.614529	0.733901	1.66185	0.0406788
c41814_g2	ORF type:3prime_partial; len:123 2-367 (-)	36.07	4	5	59	122	14.0002	6.58057	0.993694	0.928193	0.858036	0.926641	0.554106	0.528069	0.624918	0.569031	1.62845	0.00183101
c43179_g1	ORF type:5prime_partial; len:178 214-747 (-)	27.68	4	4	5	177	19.6139	10.5503	0.942975	1.2246	1.11896	1.09551	0.480794	0.882767	0.658983	0.674181	1.62495	0.0415808
c40128_g1	ORF type:internal; len:266 1-795 (-)	3.02	1	1	1	265	28.8912	4.83057	1.13906	1.20339	1.30696	1.21647	0.704579	0.746847	0.800426	0.750617	1.62063	0.00115811
c39154_g1	ORF type:complete; len:208 718-1341 (-)	52.17	11	11	27	207	23.0999	6.63916	1.00024	1.0799	0.897541	0.992561	0.526847	0.70929	0.654795	0.630311	1.57472	0.0086857
c45969_g1	ORF type:complete; len:327 79-1059 (+)	7.67	2	3	3	326	35.2595	8.11865	1.08519	1.20861	1.26045	1.18475	0.787303	0.741113	0.753413	0.76061	1.55763	0.00139808
c40538_g1	ORF type:complete; len:192 91-666 (+)	49.74	9	10	61	191	21.9376	6.96143	0.944529	0.942026	0.814798	0.900451	0.535403	0.578747	0.622223	0.578791	1.55574	0.00292051
c50685_g2	ORF type:complete; len:120 3471-3830 (+)	33.61	3	4	13	119	12.4854	6.53662	0.873993	1.29503	1.00179	1.05694	0.756102	0.623794	0.691235	0.690377	1.53096	0.0482143
c52215_g3	ORF type:complete; len:313 953-1891 (+)	26.28	8	8	21	312	34.7714	8.68994	1.42282	1.02458	1.10905	1.18548	0.790085	0.720017	0.814351	0.774818	1.53001	0.0299057
c48544_g1	ORF type:5prime_partial; len:203 1704-2312 (-)	11.39	3	3	3	202	22.6897	9.02686	0.985512	1.16796	1.32076	1.15808	0.744426	0.780163	0.766008	0.763533	1.51674	0.015498
c51939_g1	ORF type:complete; len:648 357-2300 (-)	64.45	28	37	228	647	71.0442	5.46533	0.944522	0.933669	0.874594	0.917595	0.584825	0.587133	0.643059	0.605006	1.51667	0.000413818
c42508_g1	ORF type:complete; len:354 1309-2328 (-)	2.06	1	1	1	339	38.8043	8.55811	1.20148	1.02481	1.29589	1.17406	0.711268	0.881947	0.730245	0.774487	1.51592	0.0141528
c46235_g1	ORF type:complete; len:912 31-2766 (+)	7.24	7	7	15	911	100.609	6.91748	1.22362	1.05698	1.06829	1.1163	0.674149	0.876994	0.662757	0.737966	1.51267	0.0126239
c46409_g1	ORF type:complete; len:121 979-1341 (-)	32.5	4	4	11	120	12.6277	8.48486	1.2731	0.904418	1.06029	1.07927	0.768088	0.775682	0.622212	0.721994	1.49484	0.0388132
c34946_g2	ORF type:5prime_partial; len:127 1-381 (+)	58.73	7	8	61	126	14.5286	6.81494	0.96166	0.952533	0.805815	0.90667	0.607977	0.60824	0.614779	0.610332	1.48554	0.00422523
c37387_g1	ORF type:complete; len:510 110-1639 (-)	1.77	1	1	1	509	55.4659	8.83643	0.994136	0.974156	1.05603	1.00811	0.613156	0.683732	0.786256	0.694382	1.45181	0.00497559
c34731_g1	ORF type:5prime_partial; len:479 1009-2445 (-)	5.23	3	3	3	478	53.8888	8.82178	0.918958	1.13152	1.19016	1.08021	0.635663	0.83767	0.796954	0.756763	1.42741	0.0347523
c6331_g1	ORF type:complete; len:157 52-522 (+)	4.49	1	1	10	156	17.6151	6.06201	1.06823	0.978527	0.971269	1.00601	0.699178	0.675393	0.741868	0.70548	1.42599	0.0012174
c44550_g1	ORF type:complete; len:219 545-1132 (-)	6.15	1	1	1	195	21.0276	9.14404	0.832734	0.946757	0.958003	0.912498	0.590694	0.684255	0.646711	0.640553	1.42455	0.00492274
c72972_g1	ORF type:internal; len:116 1-345 (-)	36.52	1	3	30	115	12.5975	7.44482	0.940615	0.928122	1.14601	1.00491	0.693386	0.6717	0.774241	0.713109	1.4092	0.0194559
c46494_g1	ORF type:3prime_partial; len:177 312-839 (+)	39.2	4	7	20	176	19.3499	7.18115	1.13639	0.973437	1.25411	1.12132	0.692641	0.940771	0.769204	0.800872	1.40012	0.043035
c39318_g1	ORF type:complete; len:524 60-1631 (+)	15.3	5	8	22	523	58.165	8.1626	1.00631	1.18985	1.08228	1.09281	0.786752	0.807148	0.772411	0.78877	1.38546	0.00495743
c46943_g4	ORF type:complete; len:228 416-1057 (-)	7.51	2	2	5	213	24.2049	8.89502	1.0839	1.01291	0.984172	1.027	0.75248	0.695347	0.779189	0.742339	1.38346	0.00180206
c43585_g1	ORF type:5prime_partial; len:548 2-1645 (+)	41.32	20	21	91	547	62.1044	9.61279	0.970676	1.03341	1.06169	1.02192	0.658696	0.78258	0.778682	0.739986	1.381	0.00444083
c39892_g1	ORF type:3prime_partial; len:105 3-314 (-)	59.62	4	5	19	104	10.9794	4.66553	0.909491	1.13557	1.18883	1.07796	0.69833	0.899805	0.760938	0.786358	1.37083	0.0490052
c41462_g1	ORF type:complete; len:276 182-976 (-)	26.89	6	6	10	264	29.6725	8.03076	0.976837	1.20672	1.26113	1.14823	0.828551	0.844991	0.839858	0.8378	1.37053	0.0236376
c41668_g1	ORF type:complete; len:114 199-540 (-)	39.82	3	3	8	113	11.8238	8.06006	0.94603	0.959014	1.2042	1.03641	0.724443	0.8285	0.717256	0.756733	1.36959	0.0375912
c39489_g1	ORF type:5prime_partial; len:117 242-592 (-)	63.79	7	8	27	116	12.9336	5.49072	1.0662	1.1881	1.17257	1.14229	0.8525	0.895904	0.764632	0.837679	1.36364	0.00499102
c49177_g2	ORF type:complete; len:190 77-646 (-)	52.91	7	7	9	189	21.1303	4.94482	0.873753	1.02656	0.91243	0.937581	0.694355	0.691226	0.679417	0.688333	1.3621	0.00566412
c49791_g2	ORF type:5prime_partial; len:154 2-463 (+)	19.61	3	3	6	153	17.5203	6.39209	1.18536	1.09768	1.04627	1.10977	0.631318	0.912295	0.907847	0.817153	1.3581	0.0447657
c41738_g1	ORF type:5prime_partial; len:321 1-963 (+)	64.06	12	15	98	320	34.9393	5.16064	1.08102	0.936846	1.15765	1.05851	0.712066	0.754863	0.877018	0.781315	1.35477	0.0271833
c35631_g1	ORF type:complete; len:912 263-2998 (+)	51.48	42	42	156	911	101.132	6.30322	1.0544	0.963142	0.998043	1.00519	0.699658	0.751378	0.777446	0.742828	1.3532	0.00170531
c43365_g2	ORF type:3prime_partial; len:528 701-2281 (+)	70.21	36	43	230	527	61.2253	5.56689	0.944412	1.00875	1.00464	0.985933	0.710413	0.710617	0.774644	0.731891	1.3471	0.00104188
c49313_g1	ORF type:complete; len:183 1075-1623 (-)	32.97	5	5	15	182	21.3234	6.02393	1.1187	0.988625	1.20169	1.103	0.714307	0.859156	0.883333	0.818932	1.34688	0.0251509
c46714_g1	ORF type:complete; len:192 677-1252 (-)	46.07	6	8	18	191	21.2011	8.57275	0.99551	0.969851	0.941488	0.96895	0.716441	0.708608	0.735995	0.720348	1.34511	0.000145784
c49032_g1	ORF type:complete; len:125 905-1279 (-)	8.87	1	1	1	124	14.1615	8.55811	1.13988	0.994003	1.16792	1.1006	0.771145	0.711351	0.973655	0.818717	1.3443	0.0424769
c46759_g1	ORF type:complete; len:154 156-617 (+)	61.44	9	10	49	153	17.482	6.3667	0.931191	0.885221	0.865814	0.894075	0.633191	0.679249	0.690816	0.667752	1.33893	0.000985173
c50495_g1	ORF type:complete; len:711 156-2288 (+)	11.13	8	8	13	710	78.4178	5.94775	0.777461	0.883725	1.00018	0.887121	0.659611	0.663168	0.669211	0.663997	1.33603	0.0256777
c45151_g1	ORF type:complete; len:195 836-1420 (+)	15.98	3	3	4	194	21.5171	6.96143	1.18581	1.09107	1.22494	1.16727	0.68808	0.981084	0.956591	0.875252	1.33364	0.0456889
c41228_g1	ORF type:5prime_partial; len:655 230-2194 (-)	0.92	1	1	2	654	74.5674	6.66846	1.00453	1.05341	0.920094	0.99268	0.761676	0.701214	0.77163	0.74484	1.33274	0.00518585
c30851_g1	ORF type:5prime_partial; len:125 3-377 (+)	7.26	1	1	5	124	13.7739	8.76318	1.05801	1.00657	1.12094	1.06184	0.621173	0.897693	0.876365	0.79841	1.32994	0.0498646
c41506_g1	ORF type:5prime_partial; len:170 2-511 (+)	59.17	9	13	79	169	18.4499	4.65283	1.05106	0.928514	1.05687	1.01215	0.685877	0.736735	0.86603	0.762881	1.32675	0.0214947
c40986_g1	ORF type:5prime_partial; len:197 799-1389 (-)	4.59	2	2	6	196	22.5318	9.37842	0.922201	0.997766	1.12579	1.01525	0.78088	0.745344	0.770928	0.765717	1.32588	0.0144391
c37894_g1	ORF type:complete; len:598 80-1795 (+)	27.67	15	15	38	571	62.7099	5.33838	1.06973	0.969719	0.985242	1.00823	0.721265	0.777721	0.794331	0.764439	1.31892	0.00307501
c48759_g1	ORF type:complete; len:179 306-842 (-)	25.84	4	4	11	178	19.2917	5.021	0.976971	0.918288	1.05185	0.982371	0.74671	0.740719	0.751677	0.746369	1.3162	0.00368604
c50047_g1	ORF type:complete; len:349 304-1350 (+)	19.25	5	6	10	348	38.0794	8.90967	1.04106	0.968661	0.940497	0.983404	0.733093	0.764261	0.745822	0.747725	1.31519	0.00166315
c74516_g1	ORF type:complete; len:204 69-680 (-)	6.9	1	1	1	203	22.554	5.05908	1.15987	0.958416	1.15057	1.08962	0.782435	0.780603	0.925729	0.829589	1.31344	0.0330429
c26390_g1	ORF type:internal; len:176 3-527 (+)	6.29	1	1	3	175	19.5513	6.55127	1.03369	1.0457	0.995797	1.02506	0.762666	0.733349	0.846787	0.780934	1.31261	0.00278178
c33116_g1	ORF type:complete; len:191 86-658 (+)	7.89	1	1	1	190	20.039	9.80322	1.08741	1.07575	1.21715	1.12677	0.754675	0.933604	0.911686	0.866655	1.30014	0.0228118
c34007_g1	ORF type:complete; len:118 789-1142 (+)	47.86	6	6	24	117	13.4738	5.35107	0.998761	1.02305	1.10424	1.04201	0.762372	0.750821	0.896983	0.803392	1.29702	0.0136244
c39198_g1	ORF type:5prime_partial; len:180 2-541 (+)	32.96	8	8	15	179	20.4043	6.25244	0.905134	1.01768	0.815056	0.912623	0.700793	0.682482	0.729559	0.704278	1.29583	0.0257866
c76173_g1	ORF type:complete; len:274 252-1073 (-)	12.09	2	2	2	273	30.3113	9.36377	0.893901	1.12342	1.0803	1.03254	0.784116	0.827657	0.791049	0.80094	1.28916	0.031988
c50591_g2	ORF type:3prime_partial; len:742 1621-3843 (+)	1.62	1	1	1	741	85.8049	5.07178	1.12466	0.998483	1.03264	1.05193	0.787184	0.802796	0.860621	0.816867	1.28776	0.00582133
c44791_g1	ORF type:complete; len:154 187-648 (+)	24.18	4	4	6	153	17.246	9.65674	0.943883	0.975735	0.925084	0.948234	0.69449	0.7853	0.740505	0.740099	1.28123	0.00229386
c48579_g1	ORF type:complete; len:224 159-830 (+)	9.87	1	1	1	223	23.4336	9.15869	1.15779	1.03555	1.17425	1.12253	0.818411	0.946376	0.863929	0.876239	1.28108	0.0128809
c74671_g1	ORF type:5prime_partial; len:107 139-459 (-)	39.62	1	4	29	106	11.6275	11.356	1.00089	1.19804	1.13322	1.11072	0.879535	0.855031	0.869733	0.8681	1.27948	0.0142505
c41931_g1	ORF type:complete; len:109 673-999 (+)	37.04	3	3	9	108	12.8565	7.37158	1.05252	0.964331	1.12742	1.04809	0.727704	0.856458	0.873942	0.819368	1.27915	0.025609
c37009_g1	ORF type:complete; len:477 77-1507 (-)	4.83	2	2	2	476	51.8556	5.92236	1.052	1.08713	1.11225	1.08379	0.780571	0.840825	0.921812	0.847736	1.27845	0.00606478
c33948_g2	ORF type:internal; len:154 2-460 (-)	24.18	3	3	3	153	16.7875	9.18799	1.05509	1.04775	1.08662	1.06315	0.768477	0.871614	0.872735	0.837609	1.26927	0.00350773
c35214_g2	ORF type:5prime_partial; len:101 688-990 (-)	19	2	2	8	100	11.1714	6.29053	1.00241	1.11644	1.01694	1.04526	0.700275	0.933461	0.842703	0.825479	1.26625	0.0457515
c38926_g1	ORF type:complete; len:278 209-1042 (-)	2.89	1	1	3	277	31.7835	5.32568	1.09342	0.998339	1.24879	1.11351	0.829898	0.905348	0.904185	0.87981	1.26563	0.0387977
c51374_g1	ORF type:5prime_partial; len:651 1557-3509 (-)	2.62	1	1	1	650	74.6231	5.38916	1.0388	1.20677	1.03717	1.09425	0.931103	0.858169	0.806976	0.865416	1.26442	0.0266451
c42292_g1	ORF type:3prime_partial; len:234 373-1071 (+)	14.59	2	3	6	233	24.677	6.78564	1.00848	1.1375	1.12183	1.08927	0.860509	0.926488	0.806235	0.864411	1.26013	0.0136532
c38671_g1	ORF type:5prime_partial; len:143 202-630 (-)	37.32	4	4	90	142	14.8535	9.53955	1.14275	1.06959	1.1143	1.10888	0.92345	0.806084	0.912032	0.880522	1.25935	0.00604672
c51259_g3	ORF type:complete; len:807 214-2634 (-)	2.85	2	2	2	806	91.9328	5.07178	1.03842	1.08357	1.21672	1.1129	0.793672	0.9804	0.87818	0.884084	1.25882	0.0395445
c47838_g1	ORF type:complete; len:550 208-1857 (+)	10.75	6	6	9	549	59.9554	8.74854	1.08631	0.933522	1.16002	1.05995	0.809194	0.819547	0.898195	0.842312	1.25838	0.0396672
c49906_g2	ORF type:complete; len:642 1139-3064 (+)	22.31	13	13	26	641	72.7388	5.68115	0.966339	1.00869	0.964247	0.979757	0.737339	0.796306	0.806354	0.78	1.2561	0.00153052
c43799_g1	ORF type:complete; len:353 75-1133 (+)	50.85	15	15	35	352	39.8442	7.62061	1.04956	1.00161	1.02254	1.02457	0.758494	0.82418	0.867274	0.816649	1.2546	0.00383554
c48338_g6	ORF type:internal; len:633 1-1896 (-)	14.4	1	10	89	632	70.165	5.8335	1.07765	0.994523	1.02172	1.0313	0.784499	0.774439	0.907685	0.822208	1.2543	0.0132816
c44026_g1	ORF type:5prime_partial; len:311 1569-2501 (-)	13.87	4	4	4	310	34.711	8.99756	0.981723	1.02798	0.971842	0.993848	0.740156	0.825415	0.820245	0.795272	1.2497	0.00366232
c42711_g2	ORF type:complete; len:187 363-923 (+)	54.3	10	11	37	186	21.4048	6.81494	0.98873	0.954731	1.01671	0.986723	0.744774	0.76182	0.86568	0.790758	1.24782	0.00940351
c45279_g1	ORF type:complete; len:183 177-725 (-)	3.85	1	1	1	182	19.8582	9.0415	1.04738	1.02013	1.16407	1.07719	0.772104	0.901193	0.922593	0.865297	1.24488	0.0303302
c48759_g2	ORF type:3prime_partial; len:180 2-538 (-)	54.75	9	9	30	179	19.3083	8.86572	0.978815	0.944932	1.02372	0.982489	0.740766	0.776609	0.850785	0.789387	1.24462	0.00820087
c48897_g1	ORF type:complete; len:219 103-759 (+)	6.88	1	1	1	218	25.1664	8.11865	1.06238	0.965991	0.973576	1.00065	0.904278	0.724069	0.785236	0.804528	1.24377	0.0329082
c44183_g2	ORF type:complete; len:146 811-1248 (-)	16.55	3	3	9	145	16.0179	6.49365	1.09612	0.947111	0.966644	1.00329	0.721302	0.889255	0.81216	0.807572	1.24236	0.043938
c48364_g2	ORF type:5prime_partial; len:302 3-908 (+)	27.24	7	7	18	301	34.1184	8.646	1.05067	0.923465	1.13086	1.035	0.884865	0.80428	0.812676	0.83394	1.24109	0.0374348
c42289_g2	ORF type:complete; len:298 18-911 (+)	4.38	1	1	4	297	32.9959	6.85889	1.0823	0.983399	0.996636	1.02078	0.843842	0.840196	0.786361	0.823466	1.23961	0.00547154
c52513_g1	ORF type:complete; len:810 209-2638 (-)	17.8	16	16	26	809	91.8039	6.60986	1.05786	0.976809	1.11483	1.04983	0.738462	0.92442	0.881206	0.848029	1.23797	0.0430343
c41506_g2	ORF type:3prime_partial; len:400 491-1687 (+)	68.67	8	25	190	399	43.9657	6.22705	1.04565	0.934489	1.0329	1.00434	0.786747	0.787307	0.866139	0.813398	1.23475	0.0121796
c49528_g3	ORF type:5prime_partial; len:150 372-821 (-)	6.71	1	1	1	149	16.2655	8.86572	0.983655	1.13143	1.07621	1.06376	0.790236	0.972556	0.825785	0.862859	1.23283	0.0464354
c44157_g1	ORF type:complete; len:207 719-1339 (-)	2.91	1	1	1	206	22.8171	6.354	1.00987	1.07259	1.17132	1.08459	0.789221	0.873806	0.978904	0.880644	1.23159	0.0476662
c49076_g1	ORF type:complete; len:332 598-1593 (-)	25.98	8	8	18	331	36.4358	4.97021	1.02684	0.974737	0.948242	0.983275	0.76221	0.832998	0.799926	0.798378	1.23159	0.00389475
c51797_g7	ORF type:5prime_partial; len:131 98-490 (-)	24.62	1	4	52	130	14.8871	9.92041	1.11563	1.04206	1.18074	1.11281	0.948778	0.86372	0.906176	0.906225	1.22796	0.0117195
c44201_g2	ORF type:complete; len:412 427-1662 (+)	4.38	1	2	4	411	47.4762	5.18604	1.05591	0.967323	1.14421	1.05581	0.891338	0.767863	0.924613	0.861271	1.22588	0.0495841
c49955_g2	ORF type:complete; len:220 302-961 (-)	3.2	1	1	1	219	24.8726	9.33447	1.06797	1.00563	1.17124	1.08161	0.875617	0.937082	0.856802	0.889834	1.21552	0.0238184
c35737_g1	ORF type:5prime_partial; len:155 2-466 (+)	24.68	4	4	6	154	17.475	7.92822	0.932189	1.05259	1.00415	0.996309	0.803657	0.81619	0.847092	0.822313	1.21159	0.00954021
c43188_g1	ORF type:complete; len:287 424-1284 (+)	4.55	2	2	2	286	31.1364	7.25439	1.04219	1.02874	1.21363	1.09485	0.840931	0.937178	0.93328	0.903797	1.21139	0.0469523
c36857_g1	ORF type:5prime_partial; len:717 100-2250 (-)	13.27	7	7	9	716	79.885	8.36768	0.980089	0.94387	1.07533	0.999762	0.861542	0.769739	0.844841	0.825374	1.21128	0.022562
c46600_g1	ORF type:5prime_partial; len:146 368-805 (-)	41.38	7	7	18	145	16.7946	6.53662	1.09114	0.990422	1.07879	1.05345	0.813723	0.930111	0.869898	0.871244	1.20913	0.0169143
c40228_g2	ORF type:complete; len:150 856-1305 (-)	24.83	4	4	32	149	16.5889	9.5249	1.03507	1.00178	0.986672	1.00784	0.864639	0.881557	0.757155	0.83445	1.20779	0.0139348
c43387_g1	ORF type:complete; len:420 175-1434 (-)	1.91	1	1	1	419	46.8205	8.80713	1.11754	1.07441	1.21389	1.13528	0.961691	0.856996	1.01135	0.943347	1.20346	0.0353163
c42546_g1	ORF type:complete; len:138 76-489 (+)	26.28	4	4	8	137	15.8243	7.50342	0.993045	0.956998	0.891736	0.947259	0.842057	0.716248	0.805165	0.787823	1.20238	0.0287279
c50047_g2	ORF type:3prime_partial; len:193 320-895 (+)	39.58	5	6	12	192	20.6761	8.04541	0.99148	0.940868	0.864211	0.932186	0.766558	0.795298	0.767199	0.776352	1.20073	0.0150909
c47298_g1	ORF type:complete; len:189 252-818 (+)	5.85	1	1	1	188	21.0374	9.5835	0.992386	0.971139	1.03351	0.999013	1.22383	1.24074	1.1375	1.20069	0.832034	0.00541939
c42764_g2	ORF type:5prime_partial; len:354 195-1256 (-)	35.41	8	12	81	353	38.8634	8.57275	0.941166	0.928157	1.01139	0.960238	1.21733	1.17416	1.0729	1.1548	0.831522	0.0176775
c50277_g1	ORF type:complete; len:437 1294-2604 (-)	25.69	9	9	30	436	47.992	7.76709	1.04035	1.00932	0.9429	0.997523	1.20264	1.21025	1.20239	1.20509	0.827757	0.00197973
c52694_g2	ORF type:5prime_partial; len:431 258-1550 (-)	53.95	14	24	104	430	47.9426	6.56592	1.07018	1.00187	0.923395	0.99848	1.16547	1.2974	1.16278	1.20855	0.826182	0.0267773
c43891_g1	ORF type:complete; len:217 1214-1864 (+)	23.61	5	5	11	216	24.516	7.48877	0.987064	1.04242	0.939588	0.98969	1.26385	1.08558	1.24772	1.19905	0.825392	0.0310679
c80782_g1	ORF type:internal; len:219 1-654 (+)	7.8	1	2	8	218	24.0804	7.18115	0.933992	0.957695	1.04882	0.980167	1.11487	1.17272	1.27821	1.1886	0.82464	0.0245067
c47548_g1	ORF type:complete; len:481 869-2311 (+)	33.75	7	14	35	480	53.0413	6.23975	1.03387	1.00347	0.942761	0.99337	1.11925	1.28524	1.21286	1.20578	0.823839	0.0181243
c49047_g1	ORF type:complete; len:275 177-1001 (+)	10.58	4	4	4	274	31.1187	4.38623	0.924273	0.927707	0.967078	0.939686	1.22399	1.06606	1.13569	1.14192	0.822903	0.0132819
c48951_g2	ORF type:3prime_partial; len:398 1-1191 (-)	5.29	2	2	4	397	44.026	4.86865	1.02206	1.03274	0.932401	0.995736	1.22836	1.2064	1.19816	1.21097	0.822263	0.00287571
c48865_g1	ORF type:complete; len:595 102-1886 (+)	11.62	7	7	8	594	66.0854	6.32861	0.942947	1.07293	0.926362	0.980747	1.27296	1.20331	1.10361	1.1933	0.821881	0.0346225
c39628_g1	ORF type:complete; len:251 107-859 (+)	51.2	8	10	29	250	26.7996	7.26904	0.948335	0.965527	0.909605	0.941156	1.16734	1.10255	1.1687	1.1462	0.821112	0.00170175
c50569_g1	ORF type:complete; len:707 70-2190 (+)	8.5	3	6	45	706	78.8229	8.44092	1.08707	1.0865	0.912724	1.02876	1.21627	1.33261	1.22453	1.2578	0.817906	0.0294921
c44209_g4	ORF type:5prime_partial; len:264 1164-1955 (-)	2.66	1	1	1	263	30.9767	6.65381	1.0308	0.994656	0.880108	0.968521	1.25709	1.09889	1.20207	1.18602	0.816616	0.0285491
c48179_g1	ORF type:complete; len:677 233-2263 (+)	2.37	1	1	1	676	73.0743	6.23975	1.05175	0.909321	0.942058	0.967709	1.23874	1.06708	1.25657	1.18746	0.814938	0.0414716
c32972_g1	ORF type:internal; len:181 1-540 (+)	26.67	3	5	18	180	19.5286	9.90576	1.06207	1.05052	0.884009	0.998865	1.15693	1.30759	1.21367	1.22606	0.814694	0.0348849
c52466_g1	ORF type:internal; len:144 1-429 (+)	12.59	1	2	4	143	15.071	8.45557	0.891956	0.956572	1.02414	0.957557	1.3047	1.11103	1.11632	1.17735	0.813317	0.0415508
c49552_g2	ORF type:5prime_partial; len:391 483-1655 (-)	20.77	9	9	16	390	42.6077	5.0083	0.957928	1.02611	0.940437	0.974826	1.17722	1.20611	1.21543	1.19959	0.812634	0.00140795
c50656_g2	ORF type:complete; len:634 841-2742 (-)	1.58	1	1	1	633	68.4861	5.42725	0.75387	0.823897	0.791307	0.789691	0.94613	0.907143	1.06299	0.972088	0.812366	0.0232535
c49428_g1	ORF type:5prime_partial; len:266 1-798 (+)	3.02	1	1	1	265	30.5417	7.60596	0.958679	0.974763	0.894701	0.942714	1.14035	1.21865	1.12513	1.16138	0.811722	0.0044855
c49923_g3	ORF type:5prime_partial; len:397 3-1193 (+)	3.28	1	1	1	396	42.2785	4.7417	0.82168	0.895404	0.870195	0.862427	1.18527	1.05608	0.957569	1.06631	0.808799	0.0424626
c47953_g1	ORF type:complete; len:492 90-1565 (+)	4.48	2	3	4	491	55.9706	5.70654	0.936961	0.961688	1.02093	0.973193	1.29443	1.10404	1.22477	1.20774	0.805794	0.0183204
c46875_g1	ORF type:complete; len:459 350-1726 (+)	13.1	6	6	10	458	50.3553	9.64209	1.07839	1.12765	0.910138	1.03873	1.30748	1.30526	1.25619	1.28964	0.805438	0.0209636
c63724_g1	ORF type:5prime_partial; len:122 2-367 (+)	6.61	1	1	1	121	13.478	9.11475	0.983321	1.00127	1.01931	1.0013	1.22081	1.29931	1.21242	1.24418	0.804785	0.00119521
c52430_g1	ORF type:complete; len:153 396-854 (-)	10.53	1	1	1	152	17.2273	4.94482	0.863505	1.06024	0.943564	0.95577	1.23659	1.1752	1.15793	1.18991	0.803232	0.0194015
c52592_g2	ORF type:complete; len:1360 208-4287 (-)	6.55	5	8	13	1359	148.713	8.47021	0.981713	0.989593	0.93488	0.968729	1.17273	1.25445	1.19317	1.20679	0.802734	0.00134914
c5694_g1	ORF type:5prime_partial; len:370 97-1206 (-)	3.52	1	1	1	369	42.4165	6.63916	1.01038	0.942587	0.888494	0.947153	1.16273	1.07129	1.31512	1.18305	0.800605	0.0410734
c47819_g1	ORF type:complete; len:404 293-1504 (-)	11.91	5	5	6	403	41.4614	6.88818	1.08325	0.91696	0.888474	0.962895	1.20529	1.22058	1.19471	1.20686	0.797852	0.016314
c26847_g1	ORF type:5prime_partial; len:114 2-343 (+)	7.96	1	1	1	113	11.8598	4.4624	0.893231	0.958282	0.849492	0.900335	1.20115	1.15124	1.03501	1.12914	0.797367	0.0173695
c42378_g1	ORF type:complete; len:500 32-1531 (+)	13.83	6	7	11	499	57.0216	8.646	0.940254	0.924213	0.978575	0.947681	1.15654	1.2628	1.14801	1.18912	0.796961	0.00390076
c41920_g1	ORF type:complete; len:435 337-1641 (-)	1.84	1	1	1	434	46.2184	6.354	0.989754	0.970885	0.9075	0.956046	1.12664	1.24518	1.24449	1.20544	0.793113	0.00587697
c33641_g1	ORF type:complete; len:411 906-2138 (-)	2.2	1	1	1	410	43.9832	4.81787	0.946543	0.971915	0.878602	0.932353	1.09087	1.22071	1.21906	1.17688	0.792225	0.00882639
c48333_g3	ORF type:complete; len:779 383-2719 (-)	5.27	4	4	5	778	84.6703	8.98291	0.910417	0.979276	0.863828	0.91784	1.18956	1.09001	1.19633	1.15863	0.792175	0.00741313
c43745_g2	ORF type:complete; len:327 54-983 (+)	35.6	1	12	60	309	33.199	5.90967	0.793756	0.993829	0.916609	0.901398	1.07805	1.17417	1.16604	1.13942	0.791104	0.0225019
c48416_g1	ORF type:complete; len:418 1660-2913 (-)	25.9	10	10	28	417	45.9719	7.13721	0.875718	0.980565	0.910187	0.922157	1.25761	1.13838	1.10194	1.16598	0.790889	0.0122902
c49211_g1	ORF type:complete; len:394 119-1300 (-)	32.82	4	11	36	393	43.2248	6.17627	0.944737	0.988869	0.953071	0.962226	1.28385	1.13368	1.2337	1.21708	0.790603	0.00525814
c40931_g1	ORF type:complete; len:556 241-1908 (+)	1.62	1	1	1	555	64.3833	8.47021	1.02062	0.959904	0.848115	0.94288	1.25427	1.20172	1.12572	1.1939	0.789747	0.016174
c31218_g1	ORF type:complete; len:396 430-1617 (-)	2.03	1	1	1	395	44.6445	7.43018	0.978575	0.910736	1.06044	0.983249	1.23937	1.12127	1.37463	1.24509	0.789701	0.0369561
c41200_g1	ORF type:complete; len:348 1097-2140 (+)	19.31	5	5	13	347	39.6761	5.50342	0.921641	0.893359	0.931388	0.915462	1.31698	1.07489	1.08613	1.15934	0.789644	0.0376742
c31560_g1	ORF type:complete; len:257 161-931 (-)	19.14	4	4	7	256	27.0729	6.80029	1.0535	0.92424	0.906501	0.961415	1.29814	1.14396	1.21542	1.21917	0.788579	0.0159904
c41098_g1	ORF type:5prime_partial; len:241 2-724 (+)	16.25	4	5	7	240	27.2306	7.97217	1.00567	1.07849	0.905284	0.996482	1.24519	1.34853	1.20075	1.26482	0.787843	0.0157574
c49304_g1	ORF type:complete; len:429 138-1424 (-)	15.65	7	7	10	428	46.9049	8.07471	0.896562	1.04832	0.83832	0.927735	1.1808	1.27687	1.07667	1.17811	0.787476	0.042453
c41024_g1	ORF type:5prime_partial; len:106 1109-1426 (-)	22.86	2	2	5	105	11.8846	4.50049	0.857027	0.955104	0.966167	0.926099	1.1923	1.17087	1.1703	1.17782	0.78628	0.00207353
c48564_g1	ORF type:complete; len:128 612-995 (-)	6.3	1	1	1	127	13.91	7.12256	0.999128	1.06327	0.90195	0.988118	1.32218	1.19527	1.25387	1.25711	0.786024	0.0106695
c30654_g1	ORF type:internal; len:119 2-355 (+)	5.93	1	1	1	118	12.8561	4.44971	0.91006	1.0382	0.866724	0.938328	1.32281	1.12841	1.13251	1.19458	0.78549	0.0356615
c50981_g1	ORF type:complete; len:375 54-1178 (+)	6.95	3	3	6	374	41.7343	6.15088	1.08195	0.93303	0.87144	0.96214	1.29704	1.11309	1.27799	1.22937	0.782628	0.0353734
c44977_g1	ORF type:complete; len:330 314-1303 (-)	9.12	3	3	5	329	35.376	6.01123	0.865055	0.996648	0.946628	0.93611	1.1676	1.27233	1.15098	1.19697	0.782067	0.00844372
c38957_g1	ORF type:complete; len:220 173-832 (-)	20.09	2	5	10	219	24.7049	9.92041	0.796802	0.994599	0.900251	0.897217	1.21618	1.13275	1.09326	1.1474	0.781959	0.0208594
c46733_g1	ORF type:complete; len:288 1379-2242 (-)	2.79	1	1	1	287	31.3459	8.66064	0.902932	0.860882	0.818137	0.86065	1.16512	1.0591	1.08038	1.10153	0.78132	0.00404217
c41979_g1	ORF type:complete; len:153 291-749 (+)	11.18	1	2	2	152	16.9214	8.92432	1.01327	1.10204	0.85082	0.98871	1.2823	1.36311	1.15598	1.26713	0.780274	0.0429042
c50427_g1	ORF type:complete; len:186 3136-3693 (-)	10.27	2	2	2	185	19.4488	8.57275	1.10192	0.893816	0.834615	0.943451	1.22307	1.12718	1.27914	1.20979	0.779844	0.044907
c44775_g2	ORF type:complete; len:733 154-2352 (+)	1.09	1	1	1	732	79.4263	5.63037	0.866322	0.987433	0.859763	0.904506	1.1711	1.18633	1.12683	1.16142	0.778796	0.00472272
c45090_g1	ORF type:complete; len:863 1952-4540 (-)	3.02	1	3	3	862	98.0155	6.20166	1.01316	0.983451	0.909057	0.968557	1.26767	1.20749	1.26091	1.24535	0.777737	0.00159542
c34884_g1	ORF type:3prime_partial; len:101 1-300 (-)	55	1	4	16	100	11.0642	5.08447	0.898372	1.02391	0.896041	0.93944	1.17483	1.24468	1.22582	1.21511	0.773131	0.0042552
c36028_g1	ORF type:complete; len:517 177-1727 (-)	2.91	1	1	1	516	58.3441	9.20264	0.919413	1.0529	0.873848	0.948719	1.34434	1.26929	1.07198	1.22854	0.772235	0.045312
c50110_g1	ORF type:complete; len:520 273-1832 (-)	14.45	6	6	8	519	57.6017	7.76709	0.97354	0.925896	0.911152	0.936862	1.19623	1.172	1.27181	1.21335	0.772131	0.00146087
c44830_g1	ORF type:5prime_partial; len:154 1084-1545 (-)	7.19	1	1	1	153	16.3767	7.38623	0.998996	0.775199	0.948616	0.907604	1.31943	1.11602	1.10387	1.17977	0.769304	0.0490624
c44085_g3	ORF type:5prime_partial; len:129 2-388 (+)	14.84	1	2	2	128	14.0923	8.92432	0.845601	1.03123	0.922223	0.933018	1.19761	1.21396	1.2345	1.21536	0.767691	0.00678027
c39726_g1	ORF type:complete; len:103 2-310 (+)	16.67	2	2	3	102	10.8744	9.83252	1.10042	0.886793	0.764098	0.917105	1.20481	1.21019	1.1732	1.19607	0.766768	0.0478524
c44274_g1	ORF type:complete; len:591 256-2028 (+)	1.02	1	1	1	590	66.1406	7.75244	1.17378	0.917681	0.860281	0.983913	1.30344	1.2388	1.32673	1.28966	0.762927	0.0376328
c66382_g1	ORF type:internal; len:167 3-500 (-)	5.42	1	1	1	166	19.1379	7.00537	0.915996	0.916777	0.895592	0.909455	1.17596	1.08928	1.31656	1.19393	0.76173	0.0129252
c42491_g1	ORF type:complete; len:165 213-707 (-)	39.02	4	6	20	164	18.9326	6.04932	0.834601	0.928401	0.920513	0.894505	1.27739	1.07532	1.17258	1.1751	0.761218	0.0128904
c51580_g2	ORF type:complete; len:535 2150-3754 (-)	1.5	1	1	1	534	61.6031	9.01221	0.993492	0.831085	0.921816	0.915465	1.12804	1.36665	1.11576	1.20348	0.760678	0.0377676
c45089_g1	ORF type:complete; len:125 916-1290 (+)	6.45	1	1	1	124	13.9131	7.12256	0.940965	1.00738	0.847192	0.931845	1.24305	1.25876	1.17969	1.22717	0.759346	0.0048695
c47066_g1	ORF type:complete; len:327 315-1295 (+)	26.69	8	9	22	326	36.0179	6.23975	0.966931	0.986385	0.858221	0.937179	1.38374	1.07488	1.25695	1.23852	0.756692	0.037231
c41369_g1	ORF type:5prime_partial; len:811 3-2435 (+)	2.84	2	3	3	810	90.1778	7.03467	1.01106	0.805844	1.01208	0.942995	1.32666	1.14295	1.28181	1.25048	0.754109	0.025116
c38994_g1	ORF type:complete; len:525 129-1703 (-)	3.63	2	2	2	524	57.4847	6.7417	0.980657	0.997607	0.894295	0.957519	1.43965	1.18009	1.23893	1.28622	0.744444	0.0179213
c29443_g1	ORF type:internal; len:361 3-1082 (-)	3.33	1	1	1	360	37.6834	7.09326	0.977455	0.948288	0.812727	0.912823	1.3122	1.20921	1.15971	1.22704	0.74392	0.00975976
c39337_g1	ORF type:3prime_partial; len:274 1-744 (-)	3.23	1	1	1	248	27.8077	9.51025	1.03717	0.979401	0.83044	0.949002	1.28698	1.25703	1.29123	1.27841	0.74233	0.00621524
c43782_g2	ORF type:internal; len:116 1-345 (-)	33.91	3	3	9	115	12.7123	5.14795	0.818984	1.00437	0.864284	0.89588	1.34101	1.2024	1.08791	1.21044	0.740127	0.026821
c59725_g1	ORF type:complete; len:320 27-962 (+)	28.62	8	8	11	311	34.138	5.75732	0.816831	0.967054	0.776604	0.853496	1.27846	1.09507	1.10989	1.16114	0.735052	0.0203711
c42267_g1	ORF type:complete; len:394 489-1670 (+)	68.7	11	19	79	393	42.8467	5.8208	0.998117	1.04135	0.88665	0.975372	1.29352	1.43654	1.25096	1.32701	0.735017	0.00838745
c39380_g1	ORF type:complete; len:159 56-478 (+)	38.57	8	8	30	140	15.3386	4.2085	0.976103	0.971586	0.876605	0.941431	1.202	1.45377	1.24258	1.29945	0.724484	0.013306
c42865_g1	ORF type:complete; len:358 1769-2842 (+)	8.68	4	4	4	357	39.232	10.1108	1.07345	1.06526	0.800055	0.97959	1.38656	1.32711	1.44718	1.38695	0.706291	0.0133481
c45899_g1	ORF type:complete; len:263 60-848 (+)	6.87	2	2	2	262	29.7315	9.20264	0.890581	0.87464	0.879963	0.881728	1.46689	1.01708	1.35309	1.27902	0.689378	0.0423665
c45568_g2	ORF type:5prime_partial; len:111 2-334 (+)	47.27	6	7	25	110	12.2522	5.45264	0.883869	1.01259	0.823131	0.90653	1.42314	1.32711	1.21662	1.32229	0.685575	0.00704594
c44576_g1	ORF type:complete; len:177 43-573 (+)	8.52	1	2	2	176	18.9316	8.86572	1.07856	0.940912	0.795875	0.93845	1.47237	1.20444	1.44058	1.37246	0.683771	0.020943
c48106_g1	ORF type:complete; len:351 175-1227 (+)	6	1	2	2	350	40.3717	8.67529	0.987606	0.852775	1.02061	0.953662	1.40899	1.23235	1.55817	1.39983	0.681268	0.0141443
c41062_g1	ORF type:complete; len:251 625-1377 (-)	4.8	1	1	2	250	28.2851	8.1333	0.943063	0.955586	0.755143	0.884597	1.52959	1.0638	1.3056	1.29966	0.680636	0.0498189
c50989_g1	ORF type:complete; len:867 507-3107 (-)	4.5	4	4	6	866	97.116	6.16357	0.951904	0.86119	0.982162	0.931752	1.34599	1.26106	1.5443	1.38379	0.673335	0.00780098
c50763_g2	ORF type:complete; len:331 151-1143 (+)	2.12	1	1	1	330	36.8067	4.94482	0.885487	1.02116	0.835391	0.914012	1.64864	1.19547	1.2325	1.35887	0.672626	0.0459045
c49679_g1	ORF type:complete; len:538 500-2113 (+)	7.82	3	4	4	537	61.6753	6.45557	0.818531	0.932584	0.657891	0.803002	1.02566	1.39521	1.29131	1.23739	0.648947	0.0329778
c49619_g4	ORF type:3prime_partial; len:111 1-330 (-)	65.45	1	6	34	110	11.8969	5.45264	1.01772	1.12062	0.750627	0.96299	1.65609	1.53288	1.36167	1.51688	0.634848	0.016509
c34401_g1	ORF type:complete; len:342 88-1026 (+)	7.37	3	3	3	312	35.704	5.33838	0.907716	0.848543	0.795715	0.850658	1.48521	1.53714	1.04791	1.35675	0.626981	0.0331102
c46346_g1	ORF type:complete; len:352 89-1144 (+)	10.83	4	4	7	351	38.2362	6.44287	0.867119	0.966849	0.751391	0.861786	1.55216	1.30834	1.28419	1.38156	0.623777	0.00797814
c52234_g1	ORF type:complete; len:750 136-2385 (-)	0.93	1	1	2	749	84.5668	7.60596	0.758085	0.988176	0.744787	0.830349	1.51745	1.28179	1.30366	1.36763	0.607145	0.00789184
c45006_g1	ORF type:complete; len:426 617-1894 (-)	4.47	2	2	3	425	48.4101	7.82568	0.784122	0.635004	0.828856	0.749327	1.6397	1.39	1.11532	1.38167	0.542333	0.0176258
c49085_g1	ORF type:5prime_partial; len:468 3-1406 (+)	8.57	1	1	1	467	52.0049	5.2749	0.752177	0.873549	0.618954	0.748227	1.35969	1.36321	1.47108	1.398	0.535214	0.00137971
c38633_g2	ORF type:internal; len:113 2-337 (+)	5.36	1	1	1	112	12.192	9.34912	0.940241	0.820205	0.710504	0.82365	1.9741	1.26769	1.46254	1.56811	0.525251	0.0280184
c48115_g1	ORF type:complete; len:205 44-658 (+)	9.31	2	2	2	204	21.7821	9.18799	0.581964	0.945293	0.514661	0.680639	1.56634	1.35524	1.3813	1.43429	0.474547	0.00724913
L3-L1	Table. S6B DEPs in L3-L1
Accession	Description	Coverage	Unique Peptides	Peptides	PSMs	AAs	MW [kDa]	calc. pI	C-1/REF	C-2/REF	C-3/REF	average C	A-1/REF	A-2/REF	A-3/REF	average A	L3/L1	t test p value
c41989_g1	ORF type:complete; len:164 238-729 (-)	11.04	1	1	1	163	13.6142	8.17725	1.20067	2.56995	1.5416	1.77074	0.471196	0.436716	0.401102	0.436338	4.05818	0.0317187
c49280_g1	ORF type:complete; len:309 3245-4171 (-)	46.75	15	15	135	308	35.1623	9.51025	1.05488	1.92914	1.6462	1.54341	0.493633	0.440507	0.580511	0.504884	3.05695	0.0163666
c30518_g1	ORF type:complete; len:233 200-898 (+)	34.48	8	8	28	232	26.4714	6.82959	1.29175	1.64333	1.64775	1.52761	0.475498	0.541223	0.499994	0.505572	3.02155	0.00102553
c42277_g1	ORF type:5prime_partial; len:161 2-484 (+)	5	1	1	1	160	17.49	5.69385	2.1796	1.74648	0.974563	1.63355	0.577133	0.57977	0.697647	0.618184	2.64249	0.0457906
c34881_g1	ORF type:complete; len:269 103-909 (+)	39.18	10	10	17	268	29.6878	5.10986	1.14187	1.56773	1.87373	1.52778	0.578424	0.56978	0.651176	0.599793	2.54718	0.0122439
c41814_g2	ORF type:3prime_partial; len:123 2-367 (-)	36.07	4	5	59	122	14.0002	6.58057	1.34673	1.38217	1.56808	1.43233	0.554106	0.528069	0.624918	0.569031	2.51713	0.000316753
c40538_g1	ORF type:complete; len:192 91-666 (+)	49.74	9	10	61	191	21.9376	6.96143	1.25317	1.38198	1.63015	1.42177	0.535403	0.578747	0.622223	0.578791	2.45644	0.0017503
c36056_g1	ORF type:complete; len:145 192-593 (-)	8.27	1	1	1	133	14.9574	6.32861	1.51352	1.27922	1.69942	1.49738	0.62102	0.709175	0.598067	0.642754	2.32964	0.00248101
c51939_g1	ORF type:complete; len:648 357-2300 (-)	64.45	28	37	228	647	71.0442	5.46533	1.31069	1.47806	1.398	1.39558	0.584825	0.587133	0.643059	0.605006	2.30673	0.000108685
c37668_g1	ORF type:5prime_partial; len:331 1-993 (+)	32.12	7	7	23	330	34.7618	5.5415	1.22313	1.29734	1.46334	1.32794	0.541949	0.593255	0.618501	0.584569	2.27165	0.00056666
c34946_g2	ORF type:5prime_partial; len:127 1-381 (+)	58.73	7	8	61	126	14.5286	6.81494	1.09525	1.39449	1.64502	1.37825	0.607977	0.60824	0.614779	0.610332	2.2582	0.00844948
c50801_g2	ORF type:complete; len:467 234-1634 (-)	34.12	17	19	62	466	52.2922	6.52197	1.51708	1.24734	1.29269	1.35237	0.571424	0.645381	0.623808	0.613538	2.20422	0.00101893
c44550_g1	ORF type:complete; len:219 545-1132 (-)	6.15	1	1	1	195	21.0276	9.14404	1.22035	1.49926	1.43646	1.38535	0.590694	0.684255	0.646711	0.640553	2.16275	0.00110257
c39008_g1	ORF type:complete; len:534 434-2035 (+)	1.13	1	1	1	533	60.7532	8.41162	1.22342	1.39828	1.22961	1.28377	0.590945	0.769684	0.428031	0.59622	2.15318	0.00381996
c50495_g1	ORF type:complete; len:711 156-2288 (+)	11.13	8	8	13	710	78.4178	5.94775	1.23236	1.45417	1.38886	1.35846	0.659611	0.663168	0.669211	0.663997	2.04589	0.000457841
c39027_g1	ORF type:5prime_partial; len:229 217-903 (-)	18.42	4	5	6	228	26.8837	5.5542	1.01437	1.55318	1.62979	1.39911	0.713945	0.683184	0.685053	0.69406	2.01584	0.0220369
c46759_g1	ORF type:complete; len:154 156-617 (+)	61.44	9	10	49	153	17.482	6.3667	1.43841	1.23212	1.3563	1.34228	0.633191	0.679249	0.690816	0.667752	2.01014	0.000417872
c39154_g1	ORF type:complete; len:208 718-1341 (-)	52.17	11	11	27	207	23.0999	6.63916	1.19166	1.31746	1.28971	1.26627	0.526847	0.70929	0.654795	0.630311	2.00897	0.000655503
c41127_g1	ORF type:complete; len:535 190-1794 (-)	1.31	1	1	1	534	60.7431	5.8208	1.30938	1.81416	1.08572	1.40309	0.680869	0.657056	0.797189	0.711705	1.97144	0.0346379
c49177_g2	ORF type:complete; len:190 77-646 (-)	52.91	7	7	9	189	21.1303	4.94482	1.17443	1.17916	1.4577	1.27043	0.694355	0.691226	0.679417	0.688333	1.84566	0.00342422
c39198_g1	ORF type:5prime_partial; len:180 2-541 (+)	32.96	8	8	15	179	20.4043	6.25244	1.29286	1.40731	1.18769	1.29595	0.700793	0.682482	0.729559	0.704278	1.84012	0.000802124
c42671_g1	ORF type:5prime_partial; len:166 2-499 (+)	4.24	1	1	2	165	18.1696	8.47021	0.937152	1.4413	1.11708	1.16518	0.464305	0.762374	0.68543	0.63737	1.8281	0.0376367
c37387_g1	ORF type:complete; len:510 110-1639 (-)	1.77	1	1	1	509	55.4659	8.83643	1.2762	1.21197	1.27317	1.25378	0.613156	0.683732	0.786256	0.694382	1.80561	0.000505646
c37616_g1	ORF type:5prime_partial; len:153 2-460 (+)	36.18	2	2	5	152	16.1798	8.48486	1.03358	1.00528	1.18644	1.0751	0.466957	0.526507	0.818557	0.604007	1.77995	0.0182966
c42915_g1	ORF type:complete; len:343 286-1314 (+)	2.05	1	1	1	342	39.3951	6.32861	1.51539	1.28806	1.1943	1.33258	0.694746	0.716058	0.84606	0.752288	1.77138	0.00549381
c6331_g1	ORF type:complete; len:157 52-522 (+)	4.49	1	1	10	156	17.6151	6.06201	1.31638	1.15727	1.25507	1.24291	0.699178	0.675393	0.741868	0.70548	1.76179	0.000432924
c72972_g1	ORF type:internal; len:116 1-345 (-)	36.52	1	3	30	115	12.5975	7.44482	1.40658	1.45515	0.868328	1.24335	0.693386	0.6717	0.774241	0.713109	1.74356	0.0497229
c50685_g2	ORF type:complete; len:120 3471-3830 (+)	33.61	3	4	13	119	12.4854	6.53662	1.27936	1.06677	1.22792	1.19135	0.756102	0.623794	0.691235	0.690377	1.72565	0.00255516
c34220_g1	ORF type:complete; len:120 35-394 (+)	31.09	4	4	28	119	11.9188	8.44092	1.09236	0.890889	0.800498	0.927917	0.480285	0.482951	0.660296	0.541177	1.71463	0.0210335
c43179_g1	ORF type:5prime_partial; len:178 214-747 (-)	27.68	4	4	5	177	19.6139	10.5503	1.12172	1.29938	1.04188	1.15433	0.480794	0.882767	0.658983	0.674181	1.71219	0.0259392
c34976_g1	ORF type:complete; len:125 789-1163 (+)	5.65	1	1	1	124	13.742	6.7124	1.17168	1.13405	1.19626	1.16733	0.572428	0.765547	0.728222	0.688733	1.6949	0.00150194
c46714_g1	ORF type:complete; len:192 677-1252 (-)	46.07	6	8	18	191	21.2011	8.57275	1.10977	1.25317	1.28556	1.21617	0.716441	0.708608	0.735995	0.720348	1.6883	0.000816637
c47055_g1	ORF type:complete; len:444 293-1624 (-)	1.58	1	1	1	443	48.6211	9.5249	1.36189	1.18875	1.24457	1.26507	0.728675	0.708125	0.814496	0.750432	1.68579	0.00104982
c48759_g1	ORF type:complete; len:179 306-842 (-)	25.84	4	4	11	178	19.2917	5.021	1.10696	1.25174	1.39876	1.25249	0.74671	0.740719	0.751677	0.746369	1.67811	0.00387299
c44756_g1	ORF type:complete; len:386 592-1749 (-)	2.08	1	1	1	385	41.9118	5.5542	1.12966	1.48251	1.2806	1.29759	0.78348	0.769722	0.769151	0.774118	1.67622	0.00690523
c43365_g2	ORF type:3prime_partial; len:528 701-2281 (+)	70.21	36	43	230	527	61.2253	5.56689	1.19976	1.19757	1.21854	1.20529	0.710413	0.710617	0.774644	0.731891	1.64681	2.95764e-05
c6863_g2	ORF type:internal; len:191 3-572 (-)	3.68	1	1	1	190	20.2114	6.17627	1.38119	0.93631	0.978807	1.09877	0.632842	0.705575	0.671963	0.670127	1.63964	0.0402819
c44791_g1	ORF type:complete; len:154 187-648 (+)	24.18	4	4	6	153	17.246	9.65674	1.21261	1.1155	1.31222	1.21344	0.69449	0.7853	0.740505	0.740099	1.63957	0.00163445
c41228_g1	ORF type:5prime_partial; len:655 230-2194 (-)	0.92	1	1	2	654	74.5674	6.66846	1.17389	1.17035	1.3176	1.22061	0.761676	0.701214	0.77163	0.74484	1.63876	0.000868533
c33652_g1	ORF type:complete; len:113 178-516 (-)	11.61	1	1	2	112	11.3878	8.93896	1.14941	0.858884	1.17841	1.06223	0.611837	0.771397	0.564712	0.649315	1.63593	0.0260376
c35631_g1	ORF type:complete; len:912 263-2998 (+)	51.48	42	42	156	911	101.132	6.30322	1.20268	1.15599	1.25775	1.20547	0.699658	0.751378	0.777446	0.742828	1.62282	0.000241579
c41382_g2	ORF type:5prime_partial; len:672 215-2230 (-)	4.32	1	4	7	671	75.3684	8.74854	1.28511	1.06253	1.25495	1.20086	0.736883	0.767153	0.726197	0.743411	1.61534	0.00295241
c50047_g1	ORF type:complete; len:349 304-1350 (+)	19.25	5	6	10	348	38.0794	8.90967	1.11411	1.26032	1.2227	1.19904	0.733093	0.764261	0.745822	0.747725	1.60358	0.000544168
c43585_g1	ORF type:5prime_partial; len:548 2-1645 (+)	41.32	20	21	91	547	62.1044	9.61279	1.27968	1.14502	1.13167	1.18546	0.658696	0.78258	0.778682	0.739986	1.602	0.0020301
c50047_g2	ORF type:3prime_partial; len:193 320-895 (+)	39.58	5	6	12	192	20.6761	8.04541	1.20037	1.28108	1.24623	1.24256	0.766558	0.795298	0.767199	0.776352	1.60051	5.03829e-05
c50873_g3	ORF type:5prime_partial; len:603 908-2716 (-)	33.89	15	16	32	602	64.8572	8.47021	1.19312	1.29161	1.17349	1.21941	0.775145	0.81203	0.717554	0.768243	1.58727	0.00059215
c34731_g1	ORF type:5prime_partial; len:479 1009-2445 (-)	5.23	3	3	3	478	53.8888	8.82178	1.10108	1.26713	1.23278	1.20033	0.635663	0.83767	0.796954	0.756763	1.58614	0.00512436
c50535_g1	ORF type:complete; len:215 1110-1754 (+)	9.35	2	2	2	214	23.7297	4.65283	0.993493	1.24684	1.34409	1.19481	0.766676	0.588604	0.906453	0.753911	1.58481	0.0339521
c40986_g1	ORF type:5prime_partial; len:197 799-1389 (-)	4.59	2	2	6	196	22.5318	9.37842	1.12367	1.40635	1.10271	1.21091	0.78088	0.745344	0.770928	0.765717	1.5814	0.0106532
c37894_g1	ORF type:complete; len:598 80-1795 (+)	27.67	15	15	38	571	62.7099	5.33838	1.14306	1.21612	1.26136	1.20685	0.721265	0.777721	0.794331	0.764439	1.57874	0.000416217
c41616_g1	ORF type:complete; len:4787 401-14362 (+)	0.15	1	1	1	4653	527.698	5.31299	0.965565	1.2472	1.31417	1.17565	0.608006	0.891267	0.737363	0.745545	1.57689	0.0330265
c42546_g1	ORF type:complete; len:138 76-489 (+)	26.28	4	4	8	137	15.8243	7.50342	1.22888	1.18221	1.2685	1.22653	0.842057	0.716248	0.805165	0.787823	1.55686	0.000614735
c41668_g1	ORF type:complete; len:114 199-540 (-)	39.82	3	3	8	113	11.8238	8.06006	1.15294	1.07142	1.3006	1.17499	0.724443	0.8285	0.717256	0.756733	1.55271	0.00534005
c49906_g2	ORF type:complete; len:642 1139-3064 (+)	22.31	13	13	26	641	72.7388	5.68115	1.14647	1.17336	1.30509	1.20831	0.737339	0.796306	0.806354	0.78	1.54912	0.00132301
c51367_g2	ORF type:complete; len:646 241-2178 (-)	3.72	2	2	2	645	72.1187	6.07471	1.20848	1.17638	1.08268	1.15585	0.703337	0.882564	0.660716	0.748872	1.54345	0.00636285
c41506_g1	ORF type:5prime_partial; len:170 2-511 (+)	59.17	9	13	79	169	18.4499	4.65283	1.13032	1.14474	1.25089	1.17532	0.685877	0.736735	0.86603	0.762881	1.54063	0.00329357
c40819_g3	ORF type:complete; len:234 107-808 (+)	3	1	1	1	233	25.7794	8.86572	1.05192	1.20256	1.39497	1.21648	0.746743	0.735515	0.894155	0.792137	1.5357	0.0190984
c47088_g1	ORF type:complete; len:134 399-800 (+)	6.02	1	1	2	133	14.1593	4.80518	1.10238	1.10212	1.27762	1.16071	0.647379	0.639849	0.980853	0.756027	1.53527	0.0331074
c46943_g4	ORF type:complete; len:228 416-1057 (-)	7.51	2	2	5	213	24.2049	8.89502	1.19375	1.08773	1.13247	1.13799	0.75248	0.695347	0.779189	0.742339	1.53297	0.00055538
c42773_g1	ORF type:5prime_partial; len:148 1-444 (+)	21.09	3	3	4	147	15.5458	5.97314	1.27855	1.11831	1.09757	1.16481	0.840709	0.773813	0.673427	0.76265	1.52732	0.00585329
c37385_g1	ORF type:5prime_partial; len:133 1-399 (+)	9.09	1	1	3	132	14.5195	8.60205	1.23549	1.03735	1.18732	1.15339	0.558594	0.891266	0.817474	0.755778	1.52609	0.0274578
c42711_g2	ORF type:complete; len:187 363-923 (+)	54.3	10	11	37	186	21.4048	6.81494	1.08957	1.16756	1.33957	1.1989	0.744774	0.76182	0.86568	0.790758	1.51614	0.00792892
c35285_g1	ORF type:5prime_partial; len:349 1-1047 (+)	3.74	1	1	1	348	36.5609	4.84326	1.16979	1.22367	1.14195	1.17847	0.724874	0.871963	0.73993	0.778922	1.51295	0.00160221
c40141_g1	ORF type:5prime_partial; len:326 1-978 (+)	10.77	3	3	3	325	35.1846	7.59131	0.961667	1.39383	1.22434	1.19328	0.720351	0.838133	0.817162	0.791882	1.50689	0.0373769
c46409_g1	ORF type:complete; len:121 979-1341 (-)	32.5	4	4	11	120	12.6277	8.48486	0.935744	1.113	1.20315	1.08396	0.768088	0.775682	0.622212	0.721994	1.50135	0.0177072
c48759_g2	ORF type:3prime_partial; len:180 2-538 (-)	54.75	9	9	30	179	19.3083	8.86572	1.09596	1.14623	1.30755	1.18325	0.740766	0.776609	0.850785	0.789387	1.49895	0.00531822
c52162_g2	ORF type:complete; len:266 331-1128 (+)	5.66	1	1	1	265	29.247	6.68311	1.21668	1.1962	1.18509	1.19933	0.657235	0.795331	0.952958	0.801842	1.49571	0.00983897
c36895_g1	ORF type:5prime_partial; len:383 1-1149 (+)	13.87	5	5	7	382	41.3485	9.27588	1.13926	1.22875	1.08888	1.15229	0.690148	0.802669	0.818729	0.770515	1.49548	0.00267472
c27307_g1	ORF type:3prime_partial; len:140 2-418 (+)	43.88	2	5	15	139	16.189	9.17334	1.14815	1.35522	1.26554	1.2563	0.97132	0.713009	0.841146	0.841825	1.49236	0.0123321
c45975_g2	ORF type:5prime_partial; len:102 705-1010 (-)	19.8	2	2	15	101	10.334	7.81104	1.08852	1.2947	1.10994	1.16439	0.766542	0.666414	0.911596	0.781518	1.4899	0.0166818
c46235_g1	ORF type:complete; len:912 31-2766 (+)	7.24	7	7	15	911	100.609	6.91748	1.0491	1.1021	1.13958	1.09693	0.674149	0.876994	0.662757	0.737966	1.48642	0.00848397
c44026_g1	ORF type:5prime_partial; len:311 1569-2501 (-)	13.87	4	4	4	310	34.711	8.99756	1.09955	1.17596	1.2598	1.17844	0.740156	0.825415	0.820245	0.795272	1.48181	0.00206616
c26390_g1	ORF type:internal; len:176 3-527 (+)	6.29	1	1	3	175	19.5513	6.55127	1.10942	1.12196	1.23625	1.15587	0.762666	0.733349	0.846787	0.780934	1.48012	0.00207186
c37995_g2	ORF type:internal; len:176 1-525 (-)	4	1	1	1	175	19.4628	9.48096	1.23236	1.00788	0.861109	1.03378	0.630413	0.733634	0.759229	0.707759	1.46064	0.046995
c41766_g1	ORF type:complete; len:318 139-1092 (-)	38.49	10	10	28	317	34.341	5.07178	1.22002	1.20975	1.15075	1.19351	0.788432	0.875553	0.78971	0.817898	1.45924	0.000477379
c49076_g1	ORF type:complete; len:332 598-1593 (-)	25.98	8	8	18	331	36.4358	4.97021	1.18127	1.18589	1.12478	1.16398	0.76221	0.832998	0.799926	0.798378	1.45793	0.000208676
c48897_g1	ORF type:complete; len:219 103-759 (+)	6.88	1	1	1	218	25.1664	8.11865	1.22484	1.08285	1.17489	1.16086	0.904278	0.724069	0.785236	0.804528	1.44291	0.00610729
c41738_g1	ORF type:5prime_partial; len:321 1-963 (+)	64.06	12	15	98	320	34.9393	5.16064	1.17908	1.07646	1.12499	1.12684	0.712066	0.754863	0.877018	0.781315	1.44224	0.00389201
c38329_g2	ORF type:complete; len:119 744-1100 (-)	43.22	1	6	65	118	13.3622	5.65576	1.12976	1.01167	1.40579	1.18241	0.799743	0.82528	0.851407	0.825477	1.43239	0.0387103
c38591_g1	ORF type:complete; len:255 240-1004 (+)	4.33	1	1	1	254	27.5829	6.65381	1.09892	1.2684	1.23515	1.20083	0.611573	0.999502	0.904472	0.838516	1.43209	0.0470387
c52015_g1	ORF type:complete; len:702 589-2694 (+)	15.69	10	10	12	701	79.2074	9.17334	1.09417	1.22621	1.21043	1.17694	0.842169	0.872856	0.756572	0.823866	1.42855	0.00287776
c51287_g1	ORF type:complete; len:389 1000-2166 (+)	6.7	2	2	2	388	43.599	7.76709	1.10826	1.17373	1.13163	1.13787	0.666626	0.908211	0.819083	0.797973	1.42595	0.009658
c41506_g2	ORF type:3prime_partial; len:400 491-1687 (+)	68.67	8	25	190	399	43.9657	6.22705	1.14014	1.16191	1.16655	1.1562	0.786747	0.787307	0.866139	0.813398	1.42145	0.000241567
c44257_g1	ORF type:3prime_partial; len:144 291-719 (+)	23.08	3	3	6	143	16.0261	7.18115	0.912438	1.01592	1.22455	1.05097	0.687061	0.817186	0.725762	0.743336	1.41385	0.0365816
c47000_g1	ORF type:complete; len:243 1141-1869 (-)	11.57	2	3	5	242	26.3444	7.43018	1.11429	1.23798	1.23217	1.19481	0.774142	0.923801	0.845259	0.847734	1.40942	0.00419713
c47021_g1	ORF type:5prime_partial; len:166 824-1321 (-)	14.55	2	2	5	165	18.5998	8.88037	1.15429	1.21256	1.17549	1.18078	0.80241	0.829111	0.883149	0.838223	1.40867	0.000302883
c32017_g1	ORF type:complete; len:128 45-428 (+)	25.2	4	4	5	127	13.8948	8.73389	0.951483	1.22368	1.01943	1.06486	0.715751	0.688343	0.866361	0.756819	1.40702	0.0355531
c76173_g1	ORF type:complete; len:274 252-1073 (-)	12.09	2	2	2	273	30.3113	9.36377	1.17557	1.08612	1.11347	1.12505	0.784116	0.827657	0.791049	0.80094	1.40467	0.000400945
c45122_g1	ORF type:complete; len:198 1418-2011 (+)	4.57	1	1	1	197	22.5626	6.25244	1.13441	1.2484	1.07414	1.15232	0.753187	0.953458	0.76055	0.822398	1.40116	0.0165517
c48199_g2	ORF type:complete; len:446 80-1417 (+)	15.73	8	8	11	445	48.8375	5.92236	1.21395	1.07519	1.24741	1.17885	0.793005	0.85784	0.882773	0.84454	1.39585	0.00481977
c48681_g1	ORF type:5prime_partial; len:520 2-1561 (+)	9.44	6	6	11	519	59.896	7.57666	1.059	1.04139	1.36147	1.15395	0.771789	0.817024	0.893056	0.82729	1.39486	0.0408755
c40992_g1	ORF type:3prime_partial; len:126 518-892 (+)	17.6	2	2	13	125	13.9791	5.47803	1.22595	1.05619	1.12834	1.13683	0.796836	0.800978	0.858144	0.818652	1.38866	0.00387977
c43799_g1	ORF type:complete; len:353 75-1133 (+)	50.85	15	15	35	352	39.8442	7.62061	1.0629	1.15179	1.18639	1.13369	0.758494	0.82418	0.867274	0.816649	1.38823	0.00283144
c48129_g1	ORF type:complete; len:484 571-1974 (-)	2.57	1	1	1	467	50.4427	7.25439	1.01679	1.09655	0.981531	1.03162	0.729795	0.855692	0.652205	0.745897	1.38306	0.0139199
c6749_g1	ORF type:complete; len:101 172-474 (+)	23	2	2	3	100	11.5959	5.85889	1.09503	1.07209	1.19826	1.12179	0.782625	0.851496	0.800953	0.811691	1.38204	0.00212391
c34007_g1	ORF type:complete; len:118 789-1142 (+)	47.86	6	6	24	117	13.4738	5.35107	1.16404	0.987847	1.17905	1.11031	0.762372	0.750821	0.896983	0.803392	1.38203	0.0165033
c49371_g1	ORF type:complete; len:716 58-2205 (-)	4.76	2	4	27	715	82.4799	5.08447	1.22825	1.06673	1.15246	1.14915	0.786075	0.821585	0.890019	0.83256	1.38026	0.00474349
c36857_g1	ORF type:5prime_partial; len:717 100-2250 (-)	13.27	7	7	9	716	79.885	8.36768	1.08416	1.17999	1.1393	1.13449	0.861542	0.769739	0.844841	0.825374	1.37451	0.00145338
c43204_g1	ORF type:5prime_partial; len:172 1067-1582 (-)	4.68	1	1	1	171	18.9567	9.31982	1.20104	1.09371	1.19145	1.16207	0.823864	0.852066	0.860969	0.845633	1.3742	0.00093066
c36817_g1	ORF type:complete; len:185 221-775 (-)	28.26	5	5	17	184	19.7429	8.07471	1.06108	1.04763	1.21525	1.10798	0.644639	0.935284	0.839643	0.806522	1.37378	0.040572
c37820_g1	ORF type:complete; len:220 565-1224 (-)	58.9	16	18	91	219	25.6902	6.25244	1.14738	1.12407	1.2442	1.17188	0.919162	0.803261	0.838686	0.853703	1.37271	0.00319279
c30851_g1	ORF type:5prime_partial; len:125 3-377 (+)	7.26	1	1	5	124	13.7739	8.76318	1.03587	1.09977	1.15003	1.09522	0.621173	0.897693	0.876365	0.79841	1.37175	0.0351278
c40128_g1	ORF type:internal; len:266 1-795 (-)	3.02	1	1	1	265	28.8912	4.83057	0.956078	1.14685	0.979666	1.02753	0.704579	0.746847	0.800426	0.750617	1.36892	0.0138435
c48338_g6	ORF type:internal; len:633 1-1896 (-)	14.4	1	10	89	632	70.165	5.8335	1.0042	1.1058	1.2643	1.12477	0.784499	0.774439	0.907685	0.822208	1.36799	0.0253708
c50591_g2	ORF type:3prime_partial; len:742 1621-3843 (+)	1.62	1	1	1	741	85.8049	5.07178	1.11977	1.14574	1.08171	1.11574	0.787184	0.802796	0.860621	0.816867	1.36588	0.000504309
c48468_g1	ORF type:complete; len:724 166-2337 (-)	2.07	2	2	2	723	79.7567	7.12256	1.18515	1.18332	1.13636	1.16828	0.903232	0.903695	0.765878	0.857602	1.36226	0.00306543
c46352_g1	ORF type:complete; len:135 584-988 (-)	10.45	1	1	2	134	14.4065	9.5835	1.21221	0.975442	1.23948	1.14238	0.876034	0.903393	0.739449	0.839625	1.36058	0.0365766
c47265_g1	ORF type:complete; len:492 325-1800 (+)	9.78	4	4	6	491	55.2078	5.43994	0.981045	1.31364	1.15595	1.15021	0.769858	0.928478	0.856243	0.851526	1.35076	0.0485017
c39318_g1	ORF type:complete; len:524 60-1631 (+)	15.3	5	8	22	523	58.165	8.1626	0.989015	1.03515	1.17152	1.06523	0.786752	0.807148	0.772411	0.78877	1.35049	0.00769163
c40750_g2	ORF type:complete; len:350 234-1283 (-)	60.17	17	20	62	349	38.5013	6.20166	1.10076	1.12155	1.14594	1.12275	0.827055	0.80926	0.858533	0.831616	1.35008	0.000115863
c43179_g3	ORF type:3prime_partial; len:349 26-1045 (+)	24.41	7	8	15	340	37.2949	9.02686	1.08163	1.05817	1.07771	1.0725	0.69209	0.948237	0.746156	0.795494	1.34822	0.0240488
c52937_g1	ORF type:complete; len:346 239-1276 (-)	48.7	15	15	43	345	36.0075	8.41162	1.1343	1.05355	1.245	1.14428	0.799922	0.840719	0.908448	0.849697	1.3467	0.00994535
c45969_g1	ORF type:complete; len:327 79-1059 (+)	7.67	2	3	3	326	35.2595	8.11865	1.07837	0.97163	1.02092	1.02364	0.787303	0.741113	0.753413	0.76061	1.34581	0.00146945
c35737_g1	ORF type:5prime_partial; len:155 2-466 (+)	24.68	4	4	6	154	17.475	7.92822	1.22936	0.954756	1.13326	1.10579	0.803657	0.81619	0.847092	0.822313	1.34473	0.0253728
c41170_g1	ORF type:5prime_partial; len:150 1-450 (+)	8.05	1	1	2	149	16.4084	7.1665	1.21153	0.978743	1.11455	1.10161	0.78498	0.781005	0.891934	0.819307	1.34456	0.0211632
c42289_g2	ORF type:complete; len:298 18-911 (+)	4.38	1	1	4	297	32.9959	6.85889	1.11274	1.01141	1.19444	1.1062	0.843842	0.840196	0.786361	0.823466	1.34334	0.00728562
c42508_g1	ORF type:complete; len:354 1309-2328 (-)	2.06	1	1	1	339	38.8043	8.55811	0.956424	1.06096	1.10367	1.04035	0.711268	0.881947	0.730245	0.774487	1.34328	0.0186897
c48375_g1	ORF type:5prime_partial; len:455 3-1367 (+)	27.31	9	12	34	454	49.4927	9.05615	1.14745	1.18623	1.1208	1.15149	0.884371	0.879441	0.81168	0.858497	1.34129	0.000630216
c31319_g1	ORF type:complete; len:130 126-515 (+)	6.2	1	1	21	129	13.6373	9.12939	1.0702	1.29843	1.04821	1.13895	0.825553	0.7912	0.931345	0.849366	1.34094	0.0328294
c45077_g1	ORF type:complete; len:367 240-1298 (-)	11.65	3	3	6	352	37.701	8.48486	1.01924	1.27573	1.03273	1.10923	0.724876	0.894263	0.866022	0.828387	1.33903	0.04626
c48544_g1	ORF type:5prime_partial; len:203 1704-2312 (-)	11.39	3	3	3	202	22.6897	9.02686	1.0212	1.05745	0.987345	1.022	0.744426	0.780163	0.766008	0.763533	1.33851	0.000342355
c40444_g1	ORF type:complete; len:264 358-1149 (+)	2.66	1	1	2	263	28.4748	7.31299	1.11783	1.27884	1.08623	1.16097	0.916238	0.859016	0.827123	0.867459	1.33835	0.0107438
c45627_g1	ORF type:5prime_partial; len:166 3-500 (+)	29.7	3	3	9	165	17.7773	5.12256	1.13296	0.962931	1.26076	1.11888	0.892444	0.754262	0.869134	0.838613	1.33421	0.0436052
c47553_g2	ORF type:5prime_partial; len:126 1175-1552 (-)	33.6	3	3	9	125	13.3161	8.36768	1.04132	1.07834	1.06683	1.06217	0.656026	0.886659	0.845898	0.796195	1.33405	0.020852
c49687_g2	ORF type:complete; len:244 134-865 (+)	68.31	20	20	55	243	26.4088	5.08447	1.03156	1.13989	1.1785	1.11665	0.758152	0.775996	0.981715	0.838621	1.33153	0.0298131
c35214_g2	ORF type:5prime_partial; len:101 688-990 (-)	19	2	2	8	100	11.1714	6.29053	1.1528	1.08161	1.0569	1.0971	0.700275	0.933461	0.842703	0.825479	1.32905	0.0211028
c42062_g1	ORF type:complete; len:204 361-972 (-)	35.96	7	8	11	203	22.7227	8.70459	1.111	1.03102	1.14926	1.09709	0.758378	0.940208	0.780775	0.826454	1.32747	0.0156197
c52215_g3	ORF type:complete; len:313 953-1891 (+)	26.28	8	8	21	312	34.7714	8.68994	1.03892	1.08714	0.958834	1.0283	0.790085	0.720017	0.814351	0.774818	1.32715	0.00567561
c51469_g4	ORF type:internal; len:165 1-492 (-)	12.2	1	2	2	164	19.1174	9.89111	1.168	0.938135	1.19602	1.10072	0.815101	0.902245	0.774831	0.830726	1.32501	0.0398552
c50147_g2	ORF type:complete; len:337 421-1431 (+)	2.98	1	1	1	336	38.1031	8.35303	1.18622	1.19589	1.09392	1.15868	0.757419	0.899608	0.966892	0.874639	1.32475	0.0152134
c45334_g1	ORF type:complete; len:256 784-1551 (-)	2.75	1	1	1	255	28.555	9.46631	1.13985	1.16304	1.12639	1.14309	0.79901	0.853003	0.940913	0.864309	1.32255	0.00284644
c47249_g1	ORF type:complete; len:196 64-651 (+)	40.51	6	6	12	195	21.3868	8.55811	1.12086	1.08476	1.16089	1.12217	0.746513	0.833277	0.968518	0.849436	1.32108	0.0161691
c41931_g1	ORF type:complete; len:109 673-999 (+)	37.04	3	3	9	108	12.8565	7.37158	1.09623	1.01107	1.13426	1.08052	0.727704	0.856458	0.873942	0.819368	1.31872	0.0112937
c48364_g2	ORF type:5prime_partial; len:302 3-908 (+)	27.24	7	7	18	301	34.1184	8.646	1.10026	1.09808	1.0988	1.09905	0.884865	0.80428	0.812676	0.83394	1.3179	0.000489723
c36035_g1	ORF type:complete; len:129 717-1103 (-)	14.06	2	2	2	128	14.1638	5.14795	1.04306	1.09785	1.11277	1.08456	0.681809	0.981206	0.810317	0.824444	1.3155	0.0435109
c40228_g2	ORF type:complete; len:150 856-1305 (-)	24.83	4	4	32	149	16.5889	9.5249	1.15255	1.07798	1.05595	1.0955	0.864639	0.881557	0.757155	0.83445	1.31283	0.00584579
c42296_g1	ORF type:complete; len:136 735-1142 (-)	31.11	4	4	28	135	14.9287	9.71533	1.15788	1.0876	1.04805	1.09784	0.777533	0.845362	0.887538	0.836811	1.31194	0.00452466
c44437_g1	ORF type:complete; len:110 357-686 (+)	17.43	2	2	11	109	12.1488	5.36377	1.03772	1.14688	1.14279	1.10913	0.793165	0.798028	0.946026	0.84574	1.31143	0.0128792
c30180_g1	ORF type:internal; len:264 3-791 (-)	16.35	1	3	34	263	28.9871	7.94287	1.11968	1.16755	1.16338	1.1502	0.848157	0.906427	0.889759	0.881448	1.3049	0.000312973
c49027_g1	ORF type:complete; len:478 148-1581 (-)	10.69	5	5	6	477	52.3959	5.38916	1.02964	1.07449	1.11536	1.07316	0.791662	0.80047	0.875704	0.822612	1.30458	0.00233112
c48477_g1	ORF type:complete; len:336 83-1090 (+)	5.97	2	2	2	335	37.9159	5.51611	1.12747	1.12956	1.12317	1.12673	0.822127	0.890588	0.885781	0.866166	1.30083	0.000298377
c43656_g2	ORF type:complete; len:231 634-1326 (+)	9.57	1	2	2	230	25.4454	5.38916	1.284	1.12301	1.0996	1.16887	0.992572	0.798351	0.905567	0.89883	1.30043	0.0286835
c50421_g3	ORF type:complete; len:485 133-1563 (-)	1.47	1	1	1	476	53.7456	6.55127	1.00577	1.05695	1.07932	1.04735	0.693241	0.910223	0.813392	0.805619	1.30005	0.0219831
c33948_g2	ORF type:internal; len:154 2-460 (-)	24.18	3	3	3	153	16.7875	9.18799	1.03536	1.1302	1.09847	1.08801	0.768477	0.871614	0.872735	0.837609	1.29895	0.00486779
c51439_g1	ORF type:complete; len:564 678-2369 (+)	37.66	17	17	50	563	60.9786	5.65576	1.04505	1.11116	1.19949	1.11857	0.847121	0.872582	0.876935	0.865546	1.29233	0.00519949
c47205_g6	ORF type:complete; len:552 2030-3685 (-)	12.52	6	6	12	551	60.686	7.82568	1.17848	1.07359	1.01727	1.08978	0.826593	0.911174	0.792365	0.843377	1.29216	0.0139399
c43648_g1	ORF type:complete; len:222 393-1013 (-)	37.86	1	8	31	206	23.0906	6.23975	1.2709	1.03881	1.06471	1.12481	0.838164	0.955269	0.820753	0.871395	1.29081	0.0402739
c51855_g1	ORF type:5prime_partial; len:366 273-1370 (-)	2.74	1	1	1	365	41.1962	5.43994	1.25006	1.04353	1.14051	1.1447	0.926466	0.984903	0.749799	0.887056	1.29045	0.0495212
c50814_g2	ORF type:complete; len:600 207-2006 (-)	1.17	1	1	1	599	65.9735	7.15186	1.04433	1.00759	1.25136	1.10109	0.850342	0.869764	0.840052	0.853386	1.29026	0.0315778
c48655_g1	ORF type:complete; len:100 48-347 (+)	25.25	2	2	3	99	11.1289	9.78857	1.1634	1.07519	1.06033	1.09964	0.796634	0.771374	0.990666	0.852891	1.28931	0.0319552
c52928_g1	ORF type:complete; len:311 162-1094 (+)	29.35	6	8	18	310	34.2866	5.19873	1.1591	1.02818	1.10789	1.09839	0.838989	0.796627	0.925815	0.85381	1.28645	0.0104631
c52809_g1	ORF type:5prime_partial; len:578 2-1735 (+)	10.23	5	7	9	577	63.3181	8.08936	1.12476	1.2415	1.0261	1.13079	0.885858	0.906028	0.860215	0.884034	1.27912	0.0178906
c52513_g1	ORF type:complete; len:810 209-2638 (-)	17.8	16	16	26	809	91.8039	6.60986	1.00279	1.14325	1.10042	1.08215	0.738462	0.92442	0.881206	0.848029	1.27608	0.0285691
c50967_g3	ORF type:3prime_partial; len:146 304-738 (+)	6.9	1	1	1	145	16.5548	8.36768	1.03287	1.18278	1.12997	1.11521	0.759962	0.930023	0.933707	0.874564	1.27516	0.0290166
c39410_g1	ORF type:complete; len:128 140-523 (-)	13.39	2	2	2	127	14.0791	8.49951	1.1114	1.12182	1.03705	1.09009	0.814596	0.745096	1.00514	0.854943	1.27504	0.0458758
c42510_g1	ORF type:complete; len:103 1096-1404 (-)	8.82	1	1	3	102	11.21	10.1841	1.05408	1.09563	1.22023	1.12331	0.857252	0.798382	0.988365	0.881333	1.27456	0.0322582
c48833_g1	ORF type:complete; len:338 177-1190 (+)	9.5	3	3	4	337	38.0339	5.69385	1.01681	1.14893	1.25211	1.13928	0.886058	0.945511	0.854099	0.895222	1.27262	0.0289597
c43357_g1	ORF type:complete; len:244 34-732 (+)	10.78	2	2	3	232	25.6591	4.86865	1.00238	1.00027	1.02169	1.00811	0.784706	0.856485	0.741943	0.794378	1.26906	0.00330816
c47838_g1	ORF type:complete; len:550 208-1857 (+)	10.75	6	6	9	549	59.9554	8.74854	1.04605	1.06175	1.09598	1.06793	0.809194	0.819547	0.898195	0.842312	1.26785	0.0020676
c48255_g1	ORF type:complete; len:270 906-1715 (+)	8.55	1	1	1	269	29.7418	7.95752	1.14716	1.10709	1.10466	1.11964	0.930314	0.830171	0.888875	0.88312	1.26782	0.00181927
c43273_g1	ORF type:complete; len:271 59-871 (+)	3.33	1	1	2	270	31.0019	7.75244	1.16399	1.09617	1.00397	1.08804	0.790009	0.87012	0.92064	0.860256	1.26479	0.0191341
c51791_g1	ORF type:complete; len:366 1119-2216 (-)	19.73	6	6	20	365	39.9114	8.41162	1.1763	1.02429	1.17342	1.12467	0.884163	0.88279	0.902715	0.889889	1.26383	0.00973964
c37213_g1	ORF type:complete; len:497 334-1824 (-)	19.76	9	9	23	496	54.6727	5.60498	1.06871	1.07047	1.13251	1.09056	0.81849	0.835877	0.937416	0.863928	1.26233	0.00600912
c46681_g1	ORF type:5prime_partial; len:153 1203-1661 (-)	5.26	1	1	4	152	16.8134	6.3667	1.03231	1.04335	1.19695	1.09087	0.834717	0.883842	0.880062	0.866207	1.25936	0.015436
c45199_g1	ORF type:complete; len:221 302-964 (-)	28.18	4	7	26	220	25.3381	6.12549	1.26026	1.15346	1.11511	1.17627	0.935151	0.851476	1.01597	0.9342	1.25913	0.0197451
c45874_g2	ORF type:complete; len:451 1356-2708 (-)	18.67	8	8	18	450	51.0912	8.19189	0.970808	1.14637	1.10153	1.0729	0.784045	0.818921	0.953961	0.852309	1.25882	0.0405011
c47552_g1	ORF type:complete; len:272 10-825 (-)	13.28	3	3	3	271	28.7513	7.48877	1.09326	1.09586	1.07299	1.08737	0.789302	0.860779	0.944498	0.86486	1.25728	0.00805415
c37009_g1	ORF type:complete; len:477 77-1507 (-)	4.83	2	2	2	476	51.8556	5.92236	0.992188	1.08424	1.11722	1.06455	0.780571	0.840825	0.921812	0.847736	1.25576	0.0173864
c48898_g1	ORF type:complete; len:348 198-1241 (-)	17.58	7	7	15	347	38.423	8.71924	1.11209	1.00429	1.15001	1.08879	0.827042	0.829509	0.945227	0.86726	1.25544	0.0193492
c51141_g1	ORF type:complete; len:374 1048-2169 (+)	2.68	1	1	1	373	40.4967	5.36377	1.07381	1.16308	1.07356	1.10348	0.783168	0.909351	0.944527	0.879015	1.25537	0.0173234
c43671_g1	ORF type:complete; len:278 215-1048 (-)	7.58	2	2	2	277	32.5868	6.20166	1.07291	1.1447	1.1148	1.1108	0.836348	0.911423	0.906995	0.884922	1.25525	0.00212798
c43202_g1	ORF type:complete; len:770 68-2311 (+)	24.1	17	17	28	747	80.6505	8.17725	1.10764	1.08757	1.11368	1.10296	0.95471	0.906343	0.778393	0.879815	1.25363	0.013745
c48249_g3	ORF type:complete; len:299 253-1149 (+)	23.15	7	7	16	298	31.9716	8.80713	1.14681	1.0473	1.1299	1.108	0.8348	0.839917	0.978116	0.884278	1.253	0.0163043
c68945_g1	ORF type:3prime_partial; len:383 125-1147 (+)	2.93	1	1	2	341	38.2538	9.96436	1.04115	1.04226	1.17255	1.08532	0.831189	0.90005	0.870258	0.867166	1.25157	0.0104243
c72376_g1	ORF type:internal; len:131 2-391 (-)	4.62	1	1	2	130	14.9037	8.83643	1.09353	1.09259	1.21505	1.13372	0.874844	0.874293	0.968896	0.906011	1.25134	0.011423
c39900_g2	ORF type:complete; len:219 71-727 (+)	22.94	3	3	3	218	24.1951	4.83057	1.00331	0.986009	1.18066	1.05666	0.788885	0.911056	0.833793	0.844578	1.25111	0.0416551
c49024_g1	ORF type:complete; len:867 1289-3889 (+)	3.81	3	3	3	866	95.2716	5.69385	1.15839	1.10309	1.14341	1.13496	0.940639	0.95055	0.834245	0.908478	1.2493	0.00511852
c42175_g2	ORF type:5prime_partial; len:459 493-1869 (-)	39.52	18	18	46	458	51.2586	8.36768	1.10637	1.08455	0.96757	1.05283	0.780122	0.852758	0.895907	0.842929	1.24901	0.0185658
c50569_g2	ORF type:5prime_partial; len:263 132-920 (-)	3.05	1	1	2	262	30.156	9.67139	1.01401	1.12342	1.18588	1.10777	0.871972	0.805068	0.985195	0.887411	1.24832	0.0387501
c47580_g1	ORF type:complete; len:301 654-1556 (+)	7.67	3	3	3	300	33.6422	5.09717	1.22072	1.01472	1.04086	1.0921	0.849889	0.912385	0.865465	0.875913	1.24681	0.0326943
c46861_g1	ORF type:complete; len:575 1270-2811 (-)	32.16	15	16	33	513	55.5633	9.5542	1.1405	1.02305	1.19637	1.11997	0.85443	0.961712	0.881167	0.899103	1.24566	0.0216399
c50425_g1	ORF type:complete; len:179 322-858 (-)	48.88	8	8	21	178	20.3586	9.43701	1.19393	1.01555	1.15295	1.12081	0.849516	0.927229	0.926304	0.901016	1.24394	0.0212613
c50729_g1	ORF type:complete; len:412 1677-2912 (+)	31.14	12	13	39	411	44.2877	7.86963	1.06276	1.00968	1.17867	1.0837	0.934878	0.841141	0.838638	0.871552	1.24342	0.0229639
c28867_g1	ORF type:internal; len:194 2-580 (-)	26.94	1	6	10	193	21.3349	5.32568	1.03831	1.07755	1.19796	1.10461	0.813335	0.938364	0.914434	0.888711	1.24293	0.0245853
c42682_g1	ORF type:complete; len:592 465-2240 (+)	31.3	17	17	36	591	65.7665	7.50342	1.11451	1.06082	1.20319	1.12617	0.920282	0.895267	0.902964	0.906171	1.24278	0.00643661
c46489_g1	ORF type:5prime_partial; len:204 357-968 (-)	4.93	1	1	3	203	22.4263	6.39209	1.07875	1.01976	1.14239	1.0803	0.794417	0.981952	0.83196	0.869443	1.24252	0.0351578
c43320_g1	ORF type:complete; len:602 2941-4746 (-)	1.5	1	1	1	601	66.6118	8.26514	1.00926	1.22451	1.04416	1.09264	0.872429	0.883811	0.887702	0.881314	1.23979	0.0341525
c40344_g1	ORF type:5prime_partial; len:130 988-1377 (-)	30.23	3	3	21	129	13.9426	4.01807	1.03336	1.0604	1.15885	1.0842	0.875437	0.827363	0.925613	0.876138	1.23748	0.0118908
c52175_g1	ORF type:complete; len:467 2100-3356 (-)	5.74	2	2	3	418	48.0541	9.56885	1.1817	1.01715	1.12729	1.10871	0.852625	0.879045	0.956416	0.896029	1.23736	0.0209217
c47760_g1	ORF type:complete; len:230 282-971 (-)	65.94	9	11	53	229	24.6234	5.12256	1.01133	1.0809	1.14821	1.08015	0.751237	0.959123	0.909106	0.873155	1.23706	0.0490801
c48919_g1	ORF type:3prime_partial; len:199 163-756 (+)	29.8	2	5	9	198	21.1909	7.23975	1.07762	1.09099	1.1364	1.10167	0.943299	0.831293	0.897922	0.890838	1.23667	0.00472101
c44469_g1	ORF type:5prime_partial; len:406 549-1766 (-)	9.88	4	4	6	405	45.0708	9.61279	1.10796	1.05464	1.05026	1.07095	0.89046	0.949198	0.76076	0.866806	1.23552	0.0253699
c49164_g1	ORF type:complete; len:412 97-1332 (+)	18.25	6	9	19	411	44.581	6.46826	1.07693	1.09861	1.08931	1.08828	0.837057	1.00575	0.802922	0.881911	1.234	0.0306455
c36305_g1	ORF type:complete; len:240 106-825 (+)	35.15	6	6	17	239	25.853	5.32568	1.0152	1.06528	1.16608	1.08219	0.871993	0.808483	0.950582	0.877019	1.23394	0.0274678
c47194_g1	ORF type:complete; len:522 1555-3120 (+)	33.21	17	17	45	521	58.3737	7.06396	1.06951	1.17851	1.08599	1.11133	0.803102	0.922034	0.981503	0.902213	1.23179	0.02862
c47753_g2	ORF type:complete; len:127 60-383 (+)	15.89	1	2	7	107	11.3199	9.30518	1.04192	1.08896	1.1732	1.10136	0.935435	0.914461	0.845871	0.898589	1.22565	0.0124761
c5683_g1	ORF type:complete; len:525 210-1724 (-)	16.87	8	8	9	504	56.6151	6.48096	1.11003	1.09848	1.08002	1.09617	0.803179	0.915975	0.964581	0.894579	1.22535	0.0142801
c51002_g1	ORF type:complete; len:478 228-1604 (-)	8.73	4	4	4	458	50.957	5.49072	1.02169	1.12746	0.965517	1.03822	0.784438	0.922655	0.837532	0.848208	1.22402	0.0379267
c41895_g1	ORF type:complete; len:226 321-998 (-)	58.22	12	12	45	225	24.6035	5.50342	1.09097	0.970951	1.1931	1.08501	0.891162	0.837796	0.935191	0.88805	1.22179	0.0483378
c42551_g1	ORF type:5prime_partial; len:136 3-410 (+)	80.74	7	9	17	135	14.8859	4.53857	1.10676	1.04546	1.13106	1.09443	0.85046	0.904959	0.934092	0.896504	1.22077	0.0049943
c48009_g7	ORF type:3prime_partial; len:309 177-1100 (+)	12.34	1	4	5	308	34.6325	8.83643	1.02754	1.13417	1.16597	1.10923	0.930238	0.847007	0.952305	0.90985	1.21913	0.0194166
c45279_g1	ORF type:complete; len:183 177-725 (-)	3.85	1	1	1	182	19.8582	9.0415	1.06884	0.985442	1.10924	1.05451	0.772104	0.901193	0.922593	0.865297	1.21867	0.0335008
c37249_g1	ORF type:complete; len:331 377-1369 (-)	29.09	7	7	24	330	37.1855	6.85889	1.0912	1.06995	1.12399	1.09504	0.903228	0.839296	0.953856	0.898793	1.21835	0.00588615
c46600_g1	ORF type:5prime_partial; len:146 368-805 (-)	41.38	7	7	18	145	16.7946	6.53662	0.96324	1.07832	1.14099	1.06085	0.813723	0.930111	0.869898	0.871244	1.21762	0.0376458
c41433_g1	ORF type:complete; len:246 1514-2251 (-)	9.39	1	1	2	245	27.1147	7.53271	1.08279	1.07761	1.04875	1.06972	0.83802	0.871574	0.926089	0.878561	1.21758	0.0023314
c45614_g1	ORF type:complete; len:216 783-1430 (-)	55.35	4	7	15	215	23.4776	5.07178	1.08999	1.08717	1.07827	1.08514	0.875572	0.880053	0.919003	0.891542	1.21715	0.000169274
c51799_g1	ORF type:complete; len:322 132-1097 (+)	16.51	4	4	5	321	35.6745	9.18799	1.08431	1.1132	1.13965	1.11238	1.02012	0.929832	0.797084	0.915679	1.21482	0.0420348
c49073_g1	ORF type:complete; len:501 124-1626 (-)	25.8	11	11	24	500	55.7783	5.92236	1.06978	1.12488	1.04715	1.0806	0.843041	0.870328	0.955305	0.889558	1.21476	0.00953739
c52006_g1	ORF type:complete; len:476 2024-3412 (-)	18.61	3	8	36	462	50.9476	6.62451	1.06394	1.14046	1.03518	1.07986	0.890442	0.86384	0.913532	0.889271	1.21432	0.00526679
c48687_g2	ORF type:5prime_partial; len:155 1088-1552 (-)	56.49	8	8	17	154	17.2364	6.88818	1.07881	1.0811	1.10951	1.08981	0.937632	0.913129	0.843744	0.898168	1.21336	0.00300715
c51752_g1	ORF type:complete; len:583 301-2049 (-)	4.64	2	2	3	582	65.0759	6.21436	1.11951	1.06275	1.08584	1.08937	0.877429	0.803647	1.0128	0.897958	1.21316	0.0392384
c49636_g1	ORF type:complete; len:510 126-1655 (+)	16.7	8	8	11	509	54.8391	5.77002	1.0056	1.05398	1.15282	1.0708	0.973603	0.813309	0.86581	0.884241	1.21098	0.0435663
c52926_g1	ORF type:5prime_partial; len:753 2-2260 (+)	6.25	5	5	6	752	84.5217	4.39893	0.953616	1.08377	1.0987	1.04536	0.832476	0.856873	0.901607	0.863652	1.2104	0.0225428
c37907_g1	ORF type:complete; len:324 338-1309 (+)	32.2	9	9	16	323	35.4848	5.65576	1.03548	1.06934	1.13909	1.0813	0.857166	0.878259	0.945166	0.89353	1.21015	0.00969725
c13900_g2	ORF type:5prime_partial; len:216 213-860 (-)	4.19	1	1	1	215	22.2828	6.22705	1.10729	1.07882	1.08058	1.0889	0.940839	0.851286	0.908137	0.900087	1.20977	0.00243374
c50658_g1	ORF type:complete; len:367 325-1425 (-)	50.55	17	17	53	366	41.1916	5.51611	1.04343	1.02106	1.16222	1.07557	0.800195	0.896658	0.971145	0.889333	1.20941	0.0479181
c40645_g1	ORF type:complete; len:211 213-845 (+)	7.14	1	1	3	210	23.0834	6.90283	1.03652	1.01743	1.18552	1.07982	0.84245	0.953778	0.882585	0.892938	1.20929	0.0399796
c51856_g1	ORF type:5prime_partial; len:342 2162-3187 (-)	12.61	5	5	7	341	37.3161	5.5415	1.02028	1.08446	1.06328	1.05601	0.860545	0.80874	0.952188	0.873824	1.20849	0.0166625
c47514_g1	ORF type:complete; len:189 79-645 (+)	5.85	1	1	1	188	21.3367	11.3706	1.04893	1.02129	1.15269	1.0743	0.819386	0.895355	0.953526	0.889422	1.20786	0.0294823
c48109_g1	ORF type:complete; len:369 284-1390 (-)	16.58	6	6	7	368	41.2985	6.55127	1.23225	1.02631	1.09949	1.11935	0.893184	0.916334	0.974026	0.927848	1.20639	0.041922
c43859_g2	ORF type:complete; len:502 165-1670 (-)	2.2	1	1	5	501	54.2473	7.91357	1.05515	1.09246	1.05028	1.06596	0.80882	0.844717	0.998739	0.884092	1.20571	0.0382716
c44638_g2	ORF type:complete; len:185 200-754 (+)	27.72	4	5	8	184	20.8667	5.90967	1.05758	1.03808	1.16159	1.08575	0.843397	0.891511	0.967774	0.900894	1.20519	0.0247721
c47289_g1	ORF type:complete; len:347 417-1457 (-)	29.19	7	8	12	346	38.2426	6.72705	1.02471	1.086	1.11899	1.07657	0.935137	0.912306	0.833814	0.893752	1.20455	0.0114402
c50801_g1	ORF type:complete; len:437 1029-2339 (-)	37.61	16	18	76	436	48.1463	5.03369	1.07212	1.03959	1.15043	1.08738	0.876527	0.915447	0.918816	0.903597	1.20339	0.00667484
c17864_g1	ORF type:5prime_partial; len:164 129-620 (-)	33.74	4	4	9	163	18.6703	7.76709	1.13401	1.05235	1.03975	1.07537	0.91602	0.884363	0.880795	0.893726	1.20324	0.00453785
c48848_g1	ORF type:complete; len:255 1061-1825 (+)	44.88	11	11	26	254	27.9736	9.0708	1.07164	1.00397	1.12981	1.06848	0.868177	0.902448	0.894325	0.888317	1.20281	0.00886845
c31874_g1	ORF type:complete; len:707 289-2121 (+)	2.62	1	2	10	610	66.5601	5.65576	1.07634	1.11167	1.14837	1.11213	0.858803	0.929129	0.986187	0.924706	1.20268	0.0114178
c49412_g1	ORF type:complete; len:194 81-584 (+)	31.74	3	3	3	167	18.0613	9.40771	1.05637	1.13762	1.04118	1.07839	0.882082	0.905056	0.903128	0.896755	1.20255	0.00415035
c39756_g1	ORF type:5prime_partial; len:146 3-440 (+)	15.17	2	2	5	145	15.622	5.04639	1.02833	1.12642	1.12282	1.09252	0.84951	1.00552	0.870505	0.908513	1.20254	0.0346433
c77975_g1	ORF type:5prime_partial; len:174 8-529 (-)	6.94	1	1	1	173	20.058	8.83643	1.03068	1.09486	1.11994	1.08183	0.933381	0.840248	0.925224	0.899618	1.20254	0.0102999
c50670_g1	ORF type:complete; len:355 117-1067 (+)	31.33	10	10	18	316	33.9132	8.44092	0.944869	0.968427	0.867246	0.926847	1.07144	1.13831	1.12892	1.11289	0.832828	0.00736404
c28565_g2	ORF type:3prime_partial; len:159 1-474 (-)	35.44	1	6	17	158	18.1402	6.21436	0.914751	0.959175	0.897145	0.923691	1.0562	1.15554	1.11999	1.11058	0.831722	0.00558519
c52871_g1	ORF type:complete; len:1346 197-4234 (-)	9.37	9	12	23	1345	147.455	7.69385	0.964424	0.955593	0.839424	0.919814	1.11825	1.14854	1.05096	1.10592	0.831721	0.0198273
c49896_g1	ORF type:complete; len:410 76-1305 (+)	25.18	10	10	19	409	47.7063	8.38232	0.919904	0.930038	0.921	0.923647	1.13339	1.19662	1.00421	1.1114	0.831063	0.0296353
c4851_g2	ORF type:3prime_partial; len:211 277-906 (+)	6.19	1	1	1	210	22.2311	6.91748	0.932044	0.900734	0.958804	0.930527	1.10517	1.0722	1.18576	1.12105	0.830053	0.00719446
c51620_g1	ORF type:complete; len:477 288-1718 (+)	9.87	5	5	9	476	51.8783	6.80029	0.875281	0.941617	0.928544	0.915147	1.10808	1.20892	0.990856	1.10262	0.829976	0.0472426
c48802_g1	ORF type:complete; len:376 267-1394 (-)	21.87	9	9	14	375	42.2483	6.66846	0.91065	0.907779	0.956663	0.925031	1.06762	1.15065	1.12593	1.11473	0.829821	0.00292091
c35823_g1	ORF type:5prime_partial; len:464 191-1582 (-)	12.31	6	6	9	463	52.0449	6.80029	0.926613	0.915924	0.908312	0.91695	1.15216	1.11314	1.04979	1.10503	0.829796	0.0034263
c48927_g1	ORF type:complete; len:381 579-1721 (-)	2.63	1	1	1	380	40.7665	6.99072	0.94459	0.877251	0.95798	0.926607	1.09965	1.21259	1.03922	1.11715	0.829437	0.0281568
c47179_g1	ORF type:complete; len:345 133-1167 (-)	47.38	11	14	49	344	37.6287	5.57959	0.924961	0.87289	0.92813	0.90866	1.12028	1.04266	1.12399	1.09564	0.829341	0.00427558
c50915_g1	ORF type:5prime_partial; len:272 815-1630 (-)	29.52	7	7	17	271	30.5715	5.31299	0.876158	1.02324	0.886323	0.928572	1.07976	1.16494	1.1156	1.1201	0.829009	0.023121
c49216_g1	ORF type:complete; len:215 1162-1806 (-)	36.92	7	7	10	214	23.2118	5.78271	0.932827	0.90354	0.924133	0.920167	1.16372	1.04127	1.12493	1.10997	0.829	0.00694477
c49626_g2	ORF type:complete; len:282 89-847 (+)	12.7	1	3	3	252	26.4866	7.23975	0.902679	0.886887	0.939727	0.909764	1.04725	1.17601	1.07243	1.09856	0.82814	0.0112216
c48780_g1	ORF type:5prime_partial; len:398 317-1510 (-)	8.06	3	3	3	397	43.8252	7.57666	0.880503	0.959138	0.905219	0.914953	1.05934	1.15444	1.10233	1.10537	0.827734	0.00612246
c29076_g1	ORF type:complete; len:297 192-1082 (-)	1.69	1	1	1	296	33.2489	6.771	0.935938	0.93126	0.898707	0.921968	1.23303	1.01409	1.10026	1.11579	0.82629	0.0401984
c38031_g1	ORF type:5prime_partial; len:190 162-731 (-)	6.35	1	1	1	189	20.2291	8.42627	0.970987	0.894097	0.886465	0.917183	1.19365	0.999684	1.13784	1.11039	0.825999	0.0385849
c36825_g1	ORF type:internal; len:110 1-327 (-)	50.46	1	5	10	109	12.2851	4.90674	0.902183	0.929805	0.932129	0.921372	1.05363	1.14789	1.14644	1.11599	0.825613	0.00396923
c39628_g1	ORF type:complete; len:251 107-859 (+)	51.2	8	10	29	250	26.7996	7.26904	0.960887	0.949903	0.927896	0.946229	1.16734	1.10255	1.1687	1.1462	0.825537	0.00111338
c47683_g2	ORF type:complete; len:331 904-1842 (-)	40.06	11	11	20	312	33.8516	8.22119	0.974232	0.927484	0.912564	0.938093	1.14886	1.22982	1.03069	1.13646	0.825454	0.0308959
c43083_g2	ORF type:complete; len:116 413-760 (-)	7.83	1	1	3	115	13.3297	7.94287	0.869306	0.949199	0.880916	0.899807	1.09139	1.16948	1.00992	1.09026	0.825312	0.0220328
c48292_g1	ORF type:complete; len:348 320-1363 (-)	5.19	2	2	3	347	39.5385	8.66064	0.886893	0.96016	0.864864	0.903973	1.01421	1.13201	1.14196	1.09606	0.824746	0.0185851
c33794_g1	ORF type:3prime_partial; len:106 1-315 (-)	21.9	1	2	21	105	11.364	6.68311	0.873394	0.872612	1.0446	0.930202	1.15499	1.13248	1.09688	1.12812	0.824561	0.0294318
c39303_g1	ORF type:internal; len:103 1-306 (-)	29.41	2	3	11	102	11.592	5.40186	0.93512	0.844609	0.968505	0.916078	1.11321	1.17209	1.05156	1.11229	0.823599	0.0181112
c41800_g1	ORF type:complete; len:123 1189-1557 (+)	25.41	2	2	2	122	13.7449	5.21143	0.965629	0.930803	0.913941	0.936791	1.12577	1.09244	1.19612	1.13811	0.823112	0.00413624
c46932_g4	ORF type:5prime_partial; len:252 3-758 (+)	68.13	10	12	35	251	27.0436	5.97314	0.916197	0.918692	0.877271	0.904053	1.0854	1.16731	1.0429	1.09854	0.822962	0.00748963
c38101_g1	ORF type:complete; len:522 136-1701 (+)	6.72	2	4	5	521	60.8078	6.72705	0.963597	0.890767	0.927396	0.927254	1.024	1.17849	1.18281	1.12843	0.821717	0.023309
c36027_g1	ORF type:complete; len:322 229-1194 (-)	1.87	1	1	1	321	36.3712	5.24951	0.936194	0.957345	0.873054	0.922198	1.16143	1.0907	1.11519	1.12244	0.821599	0.00361364
c48015_g1	ORF type:complete; len:586 322-2079 (+)	8.72	4	4	4	585	65.3483	5.03369	0.930844	0.974016	0.823684	0.909515	1.11562	1.06675	1.1413	1.10789	0.820943	0.0162999
c45747_g1	ORF type:complete; len:360 261-1340 (+)	7.8	3	3	3	359	39.514	6.03662	0.914834	0.914535	0.925212	0.918194	1.23365	1.0011	1.12144	1.11873	0.820748	0.0406363
c45312_g1	ORF type:complete; len:781 123-2465 (+)	4.74	4	4	8	780	86.395	8.98291	0.881428	0.945954	0.908721	0.912034	1.04685	1.15635	1.13145	1.11155	0.820505	0.00632551
c48408_g2	ORF type:3prime_partial; len:224 1-669 (-)	35.87	3	8	37	223	24.8802	6.66846	0.881621	0.955374	0.86826	0.901752	1.16104	1.09192	1.04709	1.10001	0.819763	0.00979364
c43113_g1	ORF type:5prime_partial; len:276 198-1025 (-)	60	15	15	53	275	31.2487	5.43994	0.92631	0.881221	0.99199	0.933174	1.07075	1.15525	1.19256	1.13952	0.818918	0.0129238
c51754_g1	ORF type:5prime_partial; len:363 289-1377 (-)	30.66	5	9	25	362	37.2036	5.50342	0.850181	1.03267	0.885258	0.922702	1.05619	1.15031	1.17793	1.12814	0.817895	0.0373581
c52815_g2	ORF type:complete; len:112 390-725 (-)	11.71	1	1	1	111	12.8852	5.08447	0.927987	0.833828	0.977612	0.913142	1.15465	1.09105	1.10542	1.11704	0.817464	0.0117028
c51347_g1	ORF type:5prime_partial; len:511 5329-6861 (-)	30.78	13	14	28	510	58.8291	8.44092	0.817164	0.895724	0.920847	0.877911	1.07117	1.05105	1.09973	1.07399	0.817433	0.00461952
c48669_g2	ORF type:5prime_partial; len:549 1-1647 (+)	2.74	2	2	2	548	62.8768	9.5835	0.956909	0.89675	0.927378	0.927012	1.15171	1.06756	1.18372	1.13433	0.817236	0.00588597
c49933_g2	ORF type:complete; len:288 248-1111 (-)	9.06	3	3	3	287	31.9221	6.0874	0.943116	0.94089	0.870314	0.918107	1.16417	1.15364	1.054	1.12394	0.816867	0.00835903
c42491_g1	ORF type:complete; len:165 213-707 (-)	39.02	4	6	20	164	18.9326	6.04932	1.02933	0.924877	0.92452	0.959576	1.27739	1.07532	1.17258	1.1751	0.816593	0.0338378
c44298_g3	ORF type:3prime_partial; len:294 102-881 (+)	30.38	2	9	18	260	29.4094	5.71924	0.901948	0.846106	0.939375	0.89581	1.06378	1.18838	1.0398	1.09732	0.816363	0.0195839
c50757_g6	ORF type:complete; len:1165 156-3650 (+)	4.04	5	5	6	1164	127.272	5.5415	0.922806	0.942122	0.880958	0.915295	1.07967	1.22308	1.06116	1.1213	0.816279	0.0191587
c51747_g1	ORF type:complete; len:198 325-918 (+)	27.41	7	7	10	197	21.6434	8.68994	0.917652	0.910591	0.913093	0.913779	1.19881	1.06666	1.09291	1.11946	0.816267	0.00705366
c39726_g1	ORF type:complete; len:103 2-310 (+)	16.67	2	2	3	102	10.8744	9.83252	0.904147	1.09632	0.925983	0.975483	1.20481	1.21019	1.1732	1.19607	0.815577	0.0234301
c51436_g2	ORF type:complete; len:658 271-2244 (+)	4.72	3	3	3	657	71.8483	6.32861	0.944414	0.924239	0.893112	0.920588	1.10111	1.11773	1.16995	1.1296	0.81497	0.00121629
c49171_g2	ORF type:complete; len:821 192-2654 (-)	11.95	8	10	16	820	91.8616	5.5542	0.864096	0.909657	0.930193	0.901315	1.03238	1.0758	1.21316	1.10711	0.814114	0.0236773
c51747_g3	ORF type:complete; len:566 398-2095 (-)	21.59	4	12	19	565	63.946	7.6499	0.922353	0.854034	0.896629	0.891005	1.10785	1.07982	1.10002	1.0959	0.813039	0.000689379
c31530_g1	ORF type:3prime_partial; len:102 1-303 (-)	9.9	1	1	4	101	11.2668	9.92041	0.971859	0.840358	0.914565	0.908927	1.08827	1.10707	1.16207	1.11914	0.812167	0.00881663
c46783_g1	ORF type:3prime_partial; len:606 1-1815 (-)	6.28	3	4	7	605	68.2992	5.05908	0.920677	0.952395	0.871673	0.914915	1.16584	1.09175	1.12382	1.12714	0.811713	0.00262127
c49522_g2	ORF type:internal; len:137 1-408 (-)	8.09	1	1	1	136	14.7802	7.86963	0.886311	0.906492	0.866661	0.886488	1.21039	1.04985	1.01673	1.09232	0.811563	0.0277848
c48416_g1	ORF type:complete; len:418 1660-2913 (-)	25.9	10	10	28	417	45.9719	7.13721	0.957779	0.990725	0.889248	0.945917	1.25761	1.13838	1.10194	1.16598	0.811267	0.0168131
c48333_g3	ORF type:complete; len:779 383-2719 (-)	5.27	4	4	5	778	84.6703	8.98291	0.907037	0.949548	0.962801	0.939795	1.18956	1.09001	1.19633	1.15863	0.811124	0.00462504
c29857_g1	ORF type:complete; len:406 224-1441 (+)	9.63	4	4	5	405	43.1346	5.08447	0.911958	0.966679	0.900457	0.926365	1.16611	1.12813	1.13207	1.1421	0.811104	0.000810438
c52785_g1	ORF type:5prime_partial; len:454 2-1363 (+)	2.43	1	1	1	453	51.6825	6.99072	0.911774	0.93425	0.947442	0.931155	1.13548	1.17393	1.14038	1.14993	0.809751	0.00016373
c37389_g2	ORF type:complete; len:282 311-1156 (-)	2.85	1	1	1	281	30.8471	4.65283	0.923927	0.907293	0.849398	0.893539	1.13145	0.994983	1.18703	1.10449	0.809009	0.0263484
c49380_g1	ORF type:3prime_partial; len:342 1643-2665 (+)	30.79	7	8	27	341	37.2524	8.79248	0.962757	0.887879	0.834713	0.895116	1.03079	1.14058	1.1502	1.10719	0.808458	0.0164688
c38998_g2	ORF type:5prime_partial; len:184 341-892 (-)	4.92	1	1	1	183	20.5868	7.34229	0.951026	0.899199	0.916476	0.922234	1.28309	1.11271	1.02656	1.14079	0.80842	0.0467644
c45792_g1	ORF type:complete; len:473 320-1708 (-)	6.71	3	3	4	462	52.2937	8.54346	0.873062	0.862539	0.965663	0.900421	1.0974	1.12645	1.12022	1.11469	0.807778	0.00321639
c46278_g1	ORF type:complete; len:391 98-1270 (+)	6.15	3	3	3	390	43.7098	7.40088	0.883847	0.86371	0.930071	0.892543	1.05769	1.02017	1.24211	1.10666	0.806521	0.0398969
c49864_g1	ORF type:3prime_partial; len:617 1-1848 (-)	1.62	1	1	1	616	68.1682	5.71924	0.791343	0.922127	0.956443	0.889971	1.09504	1.08215	1.13327	1.10349	0.806508	0.0153475
c43002_g1	ORF type:complete; len:252 81-836 (+)	3.98	1	1	1	251	28.4437	7.38623	0.894697	0.923921	0.882784	0.900467	1.07775	1.04203	1.23133	1.11704	0.806121	0.0217806
c36346_g1	ORF type:complete; len:228 1081-1710 (-)	5.26	1	1	1	209	22.8432	9.87646	0.937601	0.905637	0.866547	0.903262	1.08483	1.16807	1.11236	1.12175	0.805224	0.00239593
c42305_g1	ORF type:complete; len:321 50-964 (+)	5.59	2	2	3	304	33.5426	9.11475	0.972882	0.924675	0.842126	0.913228	1.1772	1.0458	1.18436	1.13579	0.804048	0.0196163
c51433_g1	ORF type:complete; len:1087 290-3550 (+)	0.83	1	1	1	1086	119.544	6.62451	0.917421	0.96474	0.887535	0.923232	1.13272	1.15942	1.1528	1.14831	0.803991	0.000704833
c50235_g3	ORF type:complete; len:302 1577-2482 (-)	16.94	5	5	5	301	33.7108	5.98584	0.952501	0.855313	0.915432	0.907749	1.11572	1.12	1.15149	1.12907	0.803982	0.00191061
c49428_g1	ORF type:5prime_partial; len:266 1-798 (+)	3.02	1	1	1	265	30.5417	7.60596	0.971702	0.985031	0.843565	0.933433	1.14035	1.21865	1.12513	1.16138	0.80373	0.013133
c45980_g1	ORF type:complete; len:455 926-2290 (-)	7.49	3	3	3	454	49.841	9.39307	0.805669	0.942769	0.871872	0.873437	0.988234	1.12427	1.14771	1.08674	0.803723	0.0283978
c51881_g1	ORF type:complete; len:587 303-2063 (-)	3.24	2	2	2	586	64.0866	9.59814	0.903453	0.918527	0.877798	0.899926	1.21673	1.05045	1.09353	1.12023	0.803337	0.0126351
c34480_g1	ORF type:complete; len:115 966-1310 (+)	10.53	1	1	1	114	12.4401	7.34229	0.917911	0.88113	0.890381	0.896474	1.21019	1.04229	1.09724	1.11658	0.802878	0.0121927
c51478_g1	ORF type:complete; len:402 311-1516 (+)	48.88	9	15	38	401	43.8152	6.04932	0.865103	0.923349	0.886068	0.891506	1.05612	1.2031	1.07224	1.11049	0.802807	0.0115217
c52584_g1	ORF type:complete; len:609 438-2264 (+)	24.51	7	15	24	608	68.8363	7.32764	0.915592	0.925525	0.86498	0.902032	1.14338	1.1029	1.12714	1.12447	0.802184	0.000551023
c49931_g1	ORF type:complete; len:447 180-1520 (+)	5.83	2	2	4	446	51.0304	9.02686	0.838291	0.872235	0.99748	0.902669	1.22447	1.09423	1.05717	1.12529	0.802166	0.0337046
c66796_g1	ORF type:internal; len:162 1-483 (-)	4.97	1	1	1	161	16.9759	8.79248	0.901335	0.929972	0.878668	0.903325	1.08534	1.15134	1.14266	1.12644	0.801926	0.00093696
c39017_g1	ORF type:5prime_partial; len:206 275-892 (-)	3.9	1	1	1	205	21.854	5.36377	1.00945	0.853125	0.854438	0.905673	1.17535	1.1039	1.11474	1.13133	0.800538	0.016168
c45186_g2	ORF type:internal; len:340 1-1017 (+)	2.65	1	1	1	339	39.0802	6.48096	0.927641	0.884124	0.879723	0.897163	1.13624	1.04719	1.18232	1.12192	0.799669	0.00613909
c35527_g1	ORF type:3prime_partial; len:371 114-1223 (+)	71.08	21	22	101	370	41.6532	4.34814	0.858422	0.723569	0.965571	0.849187	1.0594	1.10492	1.02243	1.06225	0.799424	0.0449873
c50910_g1	ORF type:5prime_partial; len:592 1494-3269 (-)	13.71	7	7	9	591	66.235	6.02393	0.945097	0.877909	0.902965	0.908657	1.17939	1.17199	1.06047	1.13729	0.798969	0.00610499
c49887_g1	ORF type:complete; len:503 275-1783 (+)	19.52	11	11	27	502	56.0989	9.17334	0.931978	0.888622	0.854716	0.891772	1.16178	1.08853	1.10288	1.11773	0.797843	0.00203787
c49304_g1	ORF type:complete; len:429 138-1424 (-)	15.65	7	7	10	428	46.9049	8.07471	1.03573	0.939374	0.844133	0.939746	1.1808	1.27687	1.07667	1.17811	0.797671	0.0407671
c52868_g1	ORF type:complete; len:334 554-1555 (+)	9.01	2	3	5	333	36.6417	5.2749	0.953588	0.896322	0.848011	0.899307	1.05982	1.179	1.14688	1.12857	0.796858	0.00810567
c41024_g1	ORF type:5prime_partial; len:106 1109-1426 (-)	22.86	2	2	5	105	11.8846	4.50049	0.870308	0.981434	0.962674	0.938139	1.1923	1.17087	1.1703	1.17782	0.796502	0.00240506
c50889_g1	ORF type:complete; len:620 148-2007 (+)	2.1	1	2	2	619	69.7489	8.76318	0.977108	0.920678	0.858492	0.918759	1.17432	1.1735	1.11304	1.15362	0.796413	0.004131
c33641_g1	ORF type:complete; len:411 906-2138 (-)	2.2	1	1	1	410	43.9832	4.81787	0.905179	0.95193	0.952059	0.93639	1.09087	1.22071	1.21906	1.17688	0.795655	0.00626953
c45770_g1	ORF type:complete; len:209 1352-1978 (+)	12.02	2	3	4	208	23.8923	7.86963	0.858178	0.971072	0.882534	0.903928	1.08801	1.19184	1.13095	1.13694	0.795056	0.0069619
c50757_g2	ORF type:3prime_partial; len:1015 3-3044 (-)	8.48	8	8	10	1014	107.8	5.38916	0.859402	0.881747	0.871805	0.870985	1.11864	1.11078	1.06067	1.0967	0.79419	0.000303959
c66382_g1	ORF type:internal; len:167 3-500 (-)	5.42	1	1	1	166	19.1379	7.00537	0.912302	0.981278	0.948609	0.947396	1.17596	1.08928	1.31656	1.19393	0.793509	0.0234795
c50829_g1	ORF type:3prime_partial; len:267 494-1291 (+)	37.59	8	8	22	266	30.9066	7.48877	0.928638	0.898884	0.871822	0.899781	1.10467	1.15694	1.14367	1.13509	0.792693	0.000488694
c35850_g2	ORF type:complete; len:354 49-1062 (+)	27	10	11	20	337	38.9864	6.16357	0.889543	0.89741	0.844912	0.877288	1.17551	1.19266	0.953383	1.10718	0.79236	0.0433123
c43865_g1	ORF type:complete; len:456 142-1509 (-)	40.44	15	15	45	455	50.6462	6.53662	0.947827	0.960565	0.776227	0.894873	1.14382	1.15208	1.10298	1.13296	0.789852	0.0178232
c31454_g1	ORF type:5prime_partial; len:128 2-385 (+)	17.32	2	2	4	127	13.7571	9.49561	0.866964	0.946458	0.888281	0.900567	1.2201	1.11473	1.086	1.14028	0.789779	0.00707686
c32521_g1	ORF type:5prime_partial; len:181 1014-1556 (-)	23.89	2	3	5	180	19.743	8.42627	0.880398	0.891731	0.92066	0.897596	1.09504	1.18456	1.13147	1.13703	0.789425	0.00111679
c32933_g1	ORF type:internal; len:130 1-387 (-)	20.93	1	2	2	129	14.4953	5.73193	0.876372	0.884874	0.859264	0.873503	1.04522	1.12187	1.15486	1.10732	0.788847	0.00217595
c46615_g4	ORF type:internal; len:282 1-843 (-)	48.04	2	12	62	281	31.3564	6.52197	0.88758	0.920447	0.890537	0.899521	1.1632	1.11092	1.15238	1.14216	0.787559	0.00022024
c44250_g2	ORF type:complete; len:481 434-1876 (-)	10	4	4	6	480	52.6154	6.68311	0.88371	0.825148	0.855257	0.854705	1.04588	1.04383	1.17614	1.08862	0.785128	0.00756786
c46615_g1	ORF type:5prime_partial; len:184 39-590 (-)	33.88	1	4	30	183	20.431	5.51611	0.877556	0.939428	0.901133	0.906039	1.20768	1.11789	1.14946	1.15834	0.782186	0.00137995
c47450_g1	ORF type:3prime_partial; len:291 2-871 (-)	15.86	4	4	5	290	33.0974	6.43018	0.879776	0.865059	0.868043	0.870959	1.01861	1.27147	1.05337	1.11448	0.781491	0.0372048
c43510_g1	ORF type:5prime_partial; len:416 1-1248 (+)	32.29	13	13	35	415	46.1213	8.82178	0.968799	0.856203	0.88287	0.902624	1.28892	1.12803	1.04882	1.15526	0.781318	0.0321822
c52043_g1	ORF type:5prime_partial; len:372 1-1116 (+)	5.93	1	2	2	371	41.1457	8.19189	0.857562	0.917636	0.889354	0.888184	1.05003	1.09515	1.26517	1.13678	0.781314	0.0214158
c38507_g2	ORF type:complete; len:337 303-1313 (+)	16.67	5	6	9	336	36.6125	5.40186	0.914505	0.884057	0.872928	0.890497	1.16927	1.14742	1.10514	1.14061	0.78072	0.000376261
c49184_g1	ORF type:complete; len:472 1916-3331 (-)	1.49	1	1	1	471	53.5665	8.47021	0.825279	0.981401	0.848959	0.885213	1.24633	1.09442	1.06381	1.13485	0.780025	0.0285011
c37639_g1	ORF type:complete; len:462 156-1541 (-)	6.07	2	2	2	461	52.6521	6.58057	0.823599	0.925274	0.879685	0.876186	1.09169	1.20619	1.07411	1.124	0.779528	0.00816312
c43081_g1	ORF type:5prime_partial; len:139 1461-1877 (-)	10.87	2	2	4	138	15.4381	10.2866	0.759469	0.902236	0.922424	0.861377	1.03973	1.13289	1.14352	1.10538	0.779258	0.0161011
c33338_g1	ORF type:complete; len:308 1148-2071 (+)	19.22	5	5	9	307	33.8168	5.77002	0.942536	0.888102	0.820025	0.883554	1.16253	1.21625	1.02811	1.13563	0.778029	0.0190039
c51551_g4	ORF type:complete; len:501 1925-3427 (-)	2	1	1	1	500	55.4806	8.08936	0.771883	0.958396	0.83354	0.854606	1.17137	1.11646	1.01867	1.10217	0.775388	0.0249044
c50623_g1	ORF type:complete; len:296 980-1867 (+)	17.63	5	5	13	295	32.1024	7.50342	0.919881	0.958406	0.874115	0.917467	1.30421	1.20082	1.04481	1.18328	0.775362	0.0284423
c35495_g1	ORF type:5prime_partial; len:170 581-1090 (-)	7.1	1	1	1	169	19.7446	9.78857	0.911488	0.819785	0.84157	0.857614	1.12717	1.12492	1.06891	1.107	0.77472	0.00175664
c42909_g1	ORF type:complete; len:562 614-2299 (+)	23.35	11	11	17	561	65.3093	7.81104	0.887483	0.909244	0.848653	0.881793	1.17591	1.13709	1.10305	1.13868	0.774397	0.000732712
c50228_g1	ORF type:complete; len:291 84-956 (+)	16.21	4	4	5	290	31.7091	7.57666	0.9138	0.874812	0.864441	0.884351	1.16468	1.24458	1.0258	1.14502	0.772344	0.0165385
c48554_g1	ORF type:complete; len:1115 1870-5214 (-)	0.99	1	1	1	1114	121.658	8.03076	0.981352	0.861722	0.828079	0.890384	1.03212	1.1971	1.23073	1.15332	0.77202	0.0269139
c52043_g2	ORF type:5prime_partial; len:474 1-1422 (+)	3.59	1	2	3	473	52.1809	9.31982	0.901803	0.906374	0.835975	0.881384	1.02212	1.18568	1.22208	1.1433	0.770915	0.0161985
c39412_g1	ORF type:5prime_partial; len:167 1-501 (+)	12.05	2	2	2	166	18.7433	8.30908	0.916572	0.916484	0.829513	0.887523	1.19031	1.10568	1.1613	1.15243	0.770131	0.00226629
c52102_g2	ORF type:5prime_partial; len:419 1-1257 (+)	12.2	2	3	6	418	46.4321	6.88818	0.886985	0.898377	0.839644	0.875002	1.07326	1.21531	1.12042	1.13633	0.770025	0.00454579
c64174_g1	ORF type:internal; len:314 2-940 (+)	3.19	1	1	1	313	34.5781	7.63525	0.864444	0.92306	0.856422	0.881308	1.08596	1.18342	1.16555	1.14498	0.769716	0.00196509
c43366_g1	ORF type:complete; len:211 344-952 (-)	9.9	2	2	3	202	20.4956	7.56201	0.830074	0.85239	0.896915	0.859793	1.22572	0.988268	1.13725	1.11708	0.769679	0.0233207
c51580_g2	ORF type:complete; len:535 2150-3754 (-)	1.5	1	1	1	534	61.6031	9.01221	0.920519	1.02134	0.836013	0.925958	1.12804	1.36665	1.11576	1.20348	0.769398	0.0467884
c49126_g1	ORF type:complete; len:300 99-902 (+)	13.86	2	4	4	267	31.1729	5.89697	0.878007	0.934419	0.821519	0.877982	1.10656	1.15254	1.16433	1.14114	0.769388	0.00207546
c51659_g1	ORF type:complete; len:520 90-1562 (+)	47.35	20	22	66	490	53.9909	7.38623	0.820293	0.803592	0.902624	0.84217	0.980415	1.19521	1.11203	1.09588	0.768484	0.0218804
c48733_g2	ORF type:complete; len:188 323-886 (+)	11.76	1	1	1	187	19.2026	9.72998	0.883821	0.823546	0.900677	0.869348	1.20914	1.06257	1.12229	1.13134	0.768426	0.00571372
c44977_g1	ORF type:complete; len:330 314-1303 (-)	9.12	3	3	5	329	35.376	6.01123	0.908998	0.918159	0.932165	0.919774	1.1676	1.27233	1.15098	1.19697	0.768419	0.00198684
c45870_g1	ORF type:complete; len:148 471-914 (+)	17.01	3	3	3	147	16.4794	5.51611	0.888608	0.881082	0.861243	0.876978	1.29133	1.12427	1.01665	1.14408	0.766534	0.0292344
c40683_g1	ORF type:complete; len:379 123-1259 (+)	2.65	1	1	1	378	41.1386	8.52881	0.755022	0.929256	0.894782	0.859687	1.06717	1.23201	1.06789	1.12236	0.765965	0.0263882
c43782_g2	ORF type:internal; len:116 1-345 (-)	33.91	3	3	9	115	12.7123	5.14795	0.846494	0.998233	0.935157	0.926628	1.34101	1.2024	1.08791	1.21044	0.76553	0.0292752
c42378_g1	ORF type:complete; len:500 32-1531 (+)	13.83	6	7	11	499	57.0216	8.646	0.935786	0.901396	0.893152	0.910111	1.15654	1.2628	1.14801	1.18912	0.765367	0.00205218
c53011_g1	ORF type:complete; len:307 1424-2344 (+)	19.28	3	5	14	306	34.2532	6.62451	0.893862	0.848683	0.942072	0.894872	1.2165	1.24208	1.0493	1.1693	0.765309	0.0143065
c44106_g1	ORF type:complete; len:380 320-1423 (-)	16.62	5	5	9	367	40.0422	5.09717	0.901137	0.918153	0.836043	0.885111	1.0272	1.1093	1.33434	1.15695	0.765041	0.0460845
c42452_g2	ORF type:complete; len:665 225-2219 (-)	9.34	5	6	7	664	74.5816	6.84424	0.866436	0.92717	0.856254	0.883287	1.19064	1.19753	1.07948	1.15588	0.764167	0.00350805
c82065_g1	ORF type:5prime_partial; len:148 3-446 (+)	4.76	1	1	2	147	16.8653	10.814	0.858279	0.894936	0.894301	0.882505	1.18025	1.11777	1.17194	1.15665	0.762981	0.000285294
c22565_g1	ORF type:5prime_partial; len:234 220-921 (-)	3	1	1	1	233	25.4437	8.42627	0.863904	0.854887	0.87396	0.86425	1.12336	1.02458	1.2664	1.13811	0.759372	0.0176998
c80782_g1	ORF type:internal; len:219 1-654 (+)	7.8	1	2	8	218	24.0804	7.18115	0.890886	0.907305	0.908872	0.902354	1.11487	1.17272	1.27821	1.1886	0.759174	0.00401951
c30654_g1	ORF type:internal; len:119 2-355 (+)	5.93	1	1	1	118	12.8561	4.44971	0.894069	0.929726	0.896411	0.906735	1.32281	1.12841	1.13251	1.19458	0.759043	0.0115295
c41568_g1	ORF type:complete; len:167 1139-1609 (-)	5.77	1	1	1	156	17.1056	7.7085	0.902764	0.903601	0.844093	0.883486	1.19929	1.18603	1.10777	1.16436	0.758772	0.00126475
c41398_g1	ORF type:5prime_partial; len:109 2-328 (+)	9.26	1	1	1	108	10.8586	4.42432	0.809409	0.788156	1.02348	0.873681	1.17829	1.25223	1.0282	1.15291	0.757806	0.0491353
c48148_g2	ORF type:complete; len:443 113-1441 (+)	6.79	3	3	3	442	49.3339	6.0874	0.698722	0.983774	0.891855	0.858117	1.04756	1.16481	1.19369	1.13535	0.755815	0.0435077
c52430_g1	ORF type:complete; len:153 396-854 (-)	10.53	1	1	1	152	17.2273	4.94482	0.81419	0.879707	1.00362	0.899174	1.23659	1.1752	1.15793	1.18991	0.755668	0.00859186
c40931_g1	ORF type:complete; len:556 241-1908 (+)	1.62	1	1	1	555	64.3833	8.47021	0.928767	0.868556	0.908296	0.901873	1.25427	1.20172	1.12572	1.1939	0.7554	0.00210865
c39540_g1	ORF type:5prime_partial; len:157 2-472 (+)	7.69	1	1	1	156	17.2951	8.54346	0.824814	0.936664	0.963301	0.908259	1.25729	1.03758	1.31487	1.20325	0.75484	0.0355148
c43453_g1	ORF type:complete; len:166 2-499 (+)	6.67	1	1	1	165	18.1964	8.14795	0.884921	0.847986	0.913623	0.882177	1.08812	1.19195	1.23019	1.17009	0.75394	0.00345891
c48179_g1	ORF type:complete; len:677 233-2263 (+)	2.37	1	1	1	676	73.0743	6.23975	0.917247	0.810006	0.949009	0.892087	1.23874	1.06708	1.25657	1.18746	0.751254	0.0159571
c49619_g1	ORF type:complete; len:151 12-464 (-)	74	4	8	31	150	16.5821	7.7085	0.925046	0.828719	0.809391	0.854385	1.19904	1.17162	1.0455	1.13872	0.750301	0.00867259
c44209_g4	ORF type:5prime_partial; len:264 1164-1955 (-)	2.66	1	1	1	263	30.9767	6.65381	0.943129	0.847583	0.875259	0.888657	1.25709	1.09889	1.20207	1.18602	0.749278	0.0054364
c37633_g1	ORF type:5prime_partial; len:122 2-367 (+)	23.97	5	5	9	121	13.5682	9.45166	0.861855	0.840426	0.847049	0.849777	1.10501	1.17101	1.12919	1.13507	0.748655	0.000148456
c34498_g1	ORF type:internal; len:327 1-978 (-)	7.06	2	3	3	326	36.0785	8.55811	0.84544	0.856464	0.830724	0.844209	0.98703	1.12062	1.27696	1.1282	0.748278	0.027879
c39912_g1	ORF type:complete; len:410 38-1267 (+)	31.3	10	10	16	409	43.8924	6.80029	0.860605	0.780368	0.951764	0.864245	1.09932	1.29167	1.08608	1.15902	0.745667	0.0236322
c46959_g1	ORF type:complete; len:915 1818-4193 (-)	1.01	1	1	1	791	89.605	8.39697	0.819871	0.94195	0.794455	0.852092	1.10446	1.1367	1.19157	1.14424	0.744676	0.00498336
c44085_g3	ORF type:5prime_partial; len:129 2-388 (+)	14.84	1	2	2	128	14.0923	8.92432	0.873239	0.961542	0.876787	0.903856	1.19761	1.21396	1.2345	1.21536	0.743696	0.000536009
c48865_g1	ORF type:complete; len:595 102-1886 (+)	11.62	7	7	8	594	66.0854	6.32861	0.880401	0.901127	0.879926	0.887151	1.27296	1.20331	1.10361	1.1933	0.743447	0.00350875
c39192_g1	ORF type:complete; len:504 96-1607 (+)	1.79	1	1	1	503	56.6471	9.30518	0.941002	0.883997	0.795354	0.873451	1.2716	1.12929	1.12828	1.17639	0.742482	0.00894909
c41920_g1	ORF type:complete; len:435 337-1641 (-)	1.84	1	1	1	434	46.2184	6.354	0.841653	0.914004	0.92368	0.893112	1.12664	1.24518	1.24449	1.20544	0.740904	0.00269172
c40420_g1	ORF type:complete; len:289 218-1084 (-)	9.03	3	3	4	288	31.8495	6.87354	0.953491	0.762185	0.87397	0.863215	1.18141	1.10766	1.21414	1.16774	0.739221	0.00881968
c47983_g2	ORF type:complete; len:294 246-1127 (-)	54.95	12	12	35	293	33.6125	7.72314	0.802643	0.930669	0.85597	0.863094	1.19313	1.11544	1.19439	1.16765	0.739169	0.00256786
c41642_g2	ORF type:3prime_partial; len:426 269-1543 (+)	15.76	6	6	8	425	47.9649	9.46631	0.902199	0.841572	0.817898	0.85389	1.08164	1.19805	1.19505	1.15825	0.737226	0.00266283
c52446_g1	ORF type:complete; len:195 3-587 (+)	3.61	1	1	1	194	21.3047	5.38916	0.832258	0.910906	0.876162	0.873108	1.17521	1.21884	1.16082	1.18496	0.736826	0.00040562
c41436_g1	ORF type:5prime_partial; len:165 2-496 (+)	5.49	1	1	1	164	18.1735	8.19189	0.895333	0.922731	0.785796	0.867954	1.13411	1.15072	1.2491	1.17798	0.736818	0.00491221
c49886_g2	ORF type:complete; len:225 200-874 (-)	5.36	1	1	2	224	24.0071	7.40088	0.824918	0.816282	0.838657	0.826619	0.977042	1.30606	1.08378	1.12229	0.736545	0.0382481
c44737_g1	ORF type:complete; len:508 1232-2755 (-)	1.38	1	1	2	507	55.0932	5.71924	0.842615	0.76148	0.819105	0.807733	1.04914	1.12978	1.11338	1.09743	0.73602	0.0010937
c45993_g1	ORF type:complete; len:551 24-1655 (+)	1.29	1	1	1	543	59.9044	8.98291	0.884013	0.82128	0.859475	0.854923	1.26206	1.07802	1.14484	1.16164	0.735962	0.00569226
c34884_g1	ORF type:3prime_partial; len:101 1-300 (-)	55	1	4	16	100	11.0642	5.08447	0.88565	0.92871	0.866863	0.893741	1.17483	1.24468	1.22582	1.21511	0.735522	0.000317874
c47953_g1	ORF type:complete; len:492 90-1565 (+)	4.48	2	3	4	491	55.9706	5.70654	0.924281	0.820127	0.919563	0.88799	1.29443	1.10404	1.22477	1.20774	0.735247	0.00800399
c50829_g2	ORF type:5prime_partial; len:297 1-891 (+)	5.41	2	2	2	296	33.7617	9.18799	0.879973	0.878264	0.839792	0.86601	1.14255	1.22432	1.16873	1.17853	0.73482	0.00033938
c50427_g1	ORF type:complete; len:186 3136-3693 (-)	10.27	2	2	2	185	19.4488	8.57275	0.824655	0.878281	0.963895	0.888944	1.22307	1.12718	1.27914	1.20979	0.734789	0.0059323
c50110_g1	ORF type:complete; len:520 273-1832 (-)	14.45	6	6	8	519	57.6017	7.76709	0.914787	0.885834	0.869744	0.890122	1.19623	1.172	1.27181	1.21335	0.733609	0.000596297
c29443_g1	ORF type:internal; len:361 3-1082 (-)	3.33	1	1	1	360	37.6834	7.09326	1.02213	0.887069	0.79028	0.899827	1.3122	1.20921	1.15971	1.22704	0.733329	0.015515
c52592_g2	ORF type:complete; len:1360 208-4287 (-)	6.55	5	8	13	1359	148.713	8.47021	0.858351	0.9322	0.859797	0.883449	1.17273	1.25445	1.19317	1.20679	0.732068	0.000729985
c43406_g1	ORF type:complete; len:313 318-1256 (-)	14.1	6	6	16	312	36.2143	9.40771	0.893786	0.810665	0.821214	0.841888	1.02615	1.18499	1.23966	1.15026	0.731909	0.0111695
c37689_g1	ORF type:5prime_partial; len:101 2-304 (+)	75	2	8	37	100	11.0909	8.68994	0.779369	0.895647	0.871016	0.848677	1.15937	1.12575	1.19664	1.16059	0.731248	0.0015836
c44551_g1	ORF type:5prime_partial; len:731 409-2601 (-)	0.82	1	1	1	730	81.934	6.06201	0.822342	0.944631	0.804	0.856991	1.1569	1.12002	1.23977	1.17223	0.731078	0.0050872
c49166_g1	ORF type:complete; len:317 258-1208 (+)	30.38	9	9	15	316	35.1411	7.31299	0.878364	0.915751	0.855825	0.883313	1.39666	1.12663	1.10191	1.2084	0.730978	0.0276262
c40609_g1	ORF type:complete; len:208 34-657 (+)	3.38	1	1	1	207	19.8347	6.32861	0.959887	0.91873	0.713385	0.864001	1.31258	1.21309	1.02487	1.18352	0.730029	0.0483159
c43891_g1	ORF type:complete; len:217 1214-1864 (+)	23.61	5	5	11	216	24.516	7.48877	0.880011	0.77338	0.971431	0.874941	1.26385	1.08558	1.24772	1.19905	0.729693	0.0159263
c49552_g2	ORF type:5prime_partial; len:391 483-1655 (-)	20.77	9	9	16	390	42.6077	5.0083	0.875436	0.856017	0.890152	0.873868	1.17722	1.20611	1.21543	1.19959	0.728474	2.7791e-05
c45089_g1	ORF type:complete; len:125 916-1290 (+)	6.45	1	1	1	124	13.9131	7.12256	0.910511	0.946783	0.811242	0.889512	1.24305	1.25876	1.17969	1.22717	0.724849	0.00201612
c51631_g1	ORF type:complete; len:536 973-2580 (+)	14.02	6	7	12	535	60.7836	8.77783	0.85205	0.878539	0.886676	0.872422	1.10732	1.19665	1.30702	1.20366	0.724806	0.00485434
c47633_g1	ORF type:5prime_partial; len:501 3-1505 (+)	11.4	5	5	10	500	55.8886	9.39307	0.88291	0.855899	0.849138	0.862649	1.27259	1.10597	1.20111	1.19323	0.722955	0.0025841
c51453_g1	ORF type:complete; len:379 1200-2336 (-)	6.35	2	2	2	378	41.4297	8.30908	0.707588	0.930992	0.853354	0.830645	1.05703	1.22774	1.16891	1.15123	0.72153	0.017703
c47819_g1	ORF type:complete; len:404 293-1504 (-)	11.91	5	5	6	403	41.4614	6.88818	0.867534	0.930163	0.814292	0.870663	1.20529	1.22058	1.19471	1.20686	0.721428	0.000608504
c42547_g1	ORF type:internal; len:129 1-384 (-)	53.13	5	7	28	128	13.8105	5.21143	0.86996	0.78226	0.889417	0.847212	1.10506	1.3241	1.10218	1.17712	0.719736	0.0149041
c46718_g1	ORF type:5prime_partial; len:454 442-1803 (-)	17.22	5	5	15	453	49.4726	7.32764	0.819191	0.935882	0.801253	0.852109	1.18146	1.0886	1.28709	1.18572	0.718644	0.00940777
c52963_g2	ORF type:complete; len:1426 1399-5676 (-)	1.96	3	3	3	1425	157.412	8.38232	0.83731	0.868215	0.882671	0.862732	1.25755	1.1737	1.17739	1.20288	0.717224	0.000365678
c42764_g2	ORF type:5prime_partial; len:354 195-1256 (-)	35.41	8	12	81	353	38.8634	8.57275	0.76708	0.870784	0.83894	0.825601	1.21733	1.17416	1.0729	1.1548	0.714932	0.00333809
c49211_g1	ORF type:complete; len:394 119-1300 (-)	32.82	4	11	36	393	43.2248	6.17627	0.877182	0.94049	0.792588	0.870087	1.28385	1.13368	1.2337	1.21708	0.714898	0.00486173
c47298_g1	ORF type:complete; len:189 252-818 (+)	5.85	1	1	1	188	21.0374	9.5835	0.763863	0.996046	0.809844	0.856584	1.22383	1.24074	1.1375	1.20069	0.713412	0.0115102
c48556_g2	ORF type:5prime_partial; len:257 530-1300 (-)	5.86	1	1	1	256	29.6057	6.31592	0.954592	0.834287	0.795206	0.861362	1.31203	1.20359	1.10691	1.20751	0.713336	0.0104879
c47548_g1	ORF type:complete; len:481 869-2311 (+)	33.75	7	14	35	480	53.0413	6.23975	0.866731	0.813306	0.897484	0.859174	1.11925	1.28524	1.21286	1.20578	0.712545	0.00302296
c42994_g3	ORF type:3prime_partial; len:712 1-2133 (-)	4.08	1	3	5	711	79.882	7.78174	0.818203	0.862075	0.772252	0.81751	1.19242	1.0884	1.16199	1.1476	0.712363	0.00121289
c34254_g1	ORF type:5prime_partial; len:429 653-1939 (-)	10.75	4	4	8	428	45.7913	7.15186	0.853709	0.85971	0.821498	0.844972	1.23156	1.13173	1.21445	1.19258	0.708525	0.000460863
c46642_g1	ORF type:complete; len:514 179-1543 (+)	1.32	1	1	1	454	52.5435	8.99756	0.826352	0.82045	0.820207	0.822336	1.18219	1.17016	1.13229	1.16155	0.707966	2.36746e-05
c47066_g1	ORF type:complete; len:327 315-1295 (+)	26.69	8	9	22	326	36.0179	6.23975	0.910693	0.800649	0.919037	0.876793	1.38374	1.07488	1.25695	1.23852	0.707935	0.0205937
c50277_g1	ORF type:complete; len:437 1294-2604 (-)	25.69	9	9	30	436	47.992	7.76709	0.856206	0.893088	0.800624	0.849973	1.20264	1.21025	1.20239	1.20509	0.705318	0.000192919
c31560_g1	ORF type:complete; len:257 161-931 (-)	19.14	4	4	7	256	27.0729	6.80029	0.926272	0.865697	0.785816	0.859261	1.29814	1.14396	1.21542	1.21917	0.70479	0.00396311
c52559_g1	ORF type:complete; len:520 30-1589 (-)	8.29	1	5	7	519	57.5232	7.72314	0.947307	0.831439	0.79921	0.859318	1.20584	1.41946	1.03771	1.221	0.70378	0.038679
c52826_g1	ORF type:5prime_partial; len:1041 292-3414 (-)	4.04	2	5	5	1040	116.825	7.79639	0.871688	0.81353	0.793945	0.826388	1.21291	1.23785	1.07301	1.17459	0.703555	0.00348688
c50981_g1	ORF type:complete; len:375 54-1178 (+)	6.95	3	3	6	374	41.7343	6.15088	0.851281	0.988732	0.746635	0.862216	1.29704	1.11309	1.27799	1.22937	0.701347	0.0158109
c38481_g1	ORF type:complete; len:400 515-1714 (-)	23.06	6	7	21	399	42.5483	5.42725	0.864133	0.870075	0.812618	0.848942	1.15652	1.38043	1.10341	1.21345	0.699608	0.0137145
c36028_g1	ORF type:complete; len:517 177-1727 (-)	2.91	1	1	1	516	58.3441	9.20264	1.00286	0.772758	0.80011	0.858576	1.34434	1.26929	1.07198	1.22854	0.698861	0.0273627
c37684_g1	ORF type:internal; len:264 3-791 (+)	2.28	1	1	1	263	29.4025	8.98291	0.853682	0.842376	0.792672	0.829577	1.09239	1.29953	1.17027	1.1874	0.698652	0.0048104
c46465_g1	ORF type:complete; len:565 74-1768 (+)	15.25	8	8	9	564	64.8113	9.05615	0.855243	0.843424	0.791948	0.830205	1.16897	1.25738	1.14346	1.18994	0.697687	0.000814829
c34317_g1	ORF type:complete; len:509 191-1717 (-)	2.17	1	1	1	508	55.842	8.1626	0.791966	0.836308	0.868293	0.832189	1.25377	1.02562	1.3156	1.19833	0.694458	0.0157693
c43717_g1	ORF type:complete; len:180 107-646 (+)	5.03	1	1	1	179	20.2162	4.98291	0.81709	0.845317	0.81679	0.826399	1.13571	1.19677	1.2439	1.19212	0.693216	0.00036448
c41491_g2	ORF type:internal; len:181 3-542 (+)	6.67	1	1	1	180	19.7816	5.56689	0.746434	0.850794	0.897462	0.831563	1.1885	1.1223	1.29359	1.20146	0.692126	0.00523728
c41369_g1	ORF type:5prime_partial; len:811 3-2435 (+)	2.84	2	3	3	810	90.1778	7.03467	0.86458	0.885482	0.836025	0.862029	1.32666	1.14295	1.28181	1.25048	0.689361	0.00244372
c34253_g1	ORF type:complete; len:105 1035-1349 (+)	5.77	1	1	1	104	11.1587	9.33447	0.772305	0.798119	0.942516	0.837647	1.11639	1.12424	1.40644	1.21569	0.689031	0.0257109
c42807_g1	ORF type:internal; len:199 1-594 (-)	4.55	1	1	1	198	22.2701	6.34131	0.858951	0.705619	0.86648	0.81035	1.20444	1.18592	1.14473	1.17836	0.687692	0.00264824
c48951_g2	ORF type:3prime_partial; len:398 1-1191 (-)	5.29	2	2	4	397	44.026	4.86865	0.836477	0.82629	0.834635	0.832467	1.22836	1.2064	1.19816	1.21097	0.687438	2.41323e-06
c38341_g2	ORF type:complete; len:145 849-1283 (-)	19.44	3	3	8	144	16.6117	6.771	0.784252	0.841231	0.9041	0.843194	1.26916	1.36495	1.05014	1.22808	0.686595	0.0179569
c50593_g4	ORF type:5prime_partial; len:127 6-386 (-)	16.67	2	2	2	126	14.2362	8.49951	0.856708	0.775479	0.812956	0.815048	1.23042	1.25441	1.09294	1.19259	0.683427	0.00244133
c45090_g1	ORF type:complete; len:863 1952-4540 (-)	3.02	1	3	3	862	98.0155	6.20166	0.783769	0.858946	0.898477	0.847064	1.26767	1.20749	1.26091	1.24535	0.68018	0.000500368
c45899_g1	ORF type:complete; len:263 60-848 (+)	6.87	2	2	2	262	29.7315	9.20264	0.849787	0.793948	0.959362	0.867699	1.46689	1.01708	1.35309	1.27902	0.678409	0.045638
c52694_g2	ORF type:5prime_partial; len:431 258-1550 (-)	53.95	14	24	104	430	47.9426	6.56592	0.806868	0.829681	0.816894	0.817814	1.16547	1.2974	1.16278	1.20855	0.676692	0.000961786
c31218_g1	ORF type:complete; len:396 430-1617 (-)	2.03	1	1	1	395	44.6445	7.43018	0.828649	0.885176	0.812236	0.84202	1.23937	1.12127	1.37463	1.24509	0.676273	0.00620402
c32972_g1	ORF type:internal; len:181 1-540 (+)	26.67	3	5	18	180	19.5286	9.90576	0.812847	0.810028	0.85316	0.825345	1.15693	1.30759	1.21367	1.22606	0.673168	0.00096326
c49085_g1	ORF type:5prime_partial; len:468 3-1406 (+)	8.57	1	1	1	467	52.0049	5.2749	0.756015	1.24652	0.805556	0.936031	1.35969	1.36321	1.47108	1.398	0.669552	0.0447916
c42764_g1	ORF type:complete; len:261 236-1018 (-)	64.23	13	17	184	260	28.62	5.40186	0.798392	0.845113	0.861561	0.835022	1.2466	1.44181	1.06861	1.25234	0.666768	0.0188762
c50805_g1	ORF type:internal; len:106 1-315 (-)	41.9	3	3	5	105	11.8751	5.33838	0.871826	0.847386	0.76807	0.829094	1.43275	1.22108	1.09395	1.24926	0.663668	0.0154332
c44164_g1	ORF type:5prime_partial; len:552 1117-2772 (-)	2.18	1	1	3	551	58.186	6.62451	0.828815	0.910019	0.760512	0.833115	1.19701	1.26286	1.3306	1.26349	0.659377	0.00175112
c51344_g1	ORF type:complete; len:207 990-1610 (+)	3.4	1	1	2	206	24.3335	9.0415	0.717147	0.948862	0.804875	0.823628	1.23628	1.2731	1.23827	1.24921	0.659317	0.0034328
c37921_g1	ORF type:complete; len:150 29-451 (+)	15.71	2	2	2	140	15.4129	7.18115	0.748564	0.850585	0.862384	0.820511	1.35566	1.02688	1.35416	1.24557	0.658746	0.020999
c41062_g1	ORF type:complete; len:251 625-1377 (-)	4.8	1	1	2	250	28.2851	8.1333	0.933425	0.863698	0.769346	0.85549	1.52959	1.0638	1.3056	1.29966	0.658239	0.0357442
c63724_g1	ORF type:5prime_partial; len:122 2-367 (+)	6.61	1	1	1	121	13.478	9.11475	0.758227	0.83593	0.859739	0.817965	1.22081	1.29931	1.21242	1.24418	0.657433	0.000497066
c46694_g1	ORF type:complete; len:552 231-1658 (+)	15.79	7	7	12	475	54.1844	7.48877	0.744046	0.788549	0.79812	0.776905	1.1362	1.24006	1.17052	1.18226	0.657136	0.000310461
c46338_g1	ORF type:5prime_partial; len:427 172-1452 (-)	4.46	2	2	3	426	49.4198	7.84033	0.730637	0.840816	0.874193	0.815215	1.19258	1.41575	1.1223	1.24354	0.655558	0.0121806
c50376_g4	ORF type:5prime_partial; len:257 320-1090 (-)	30.08	8	8	12	256	27.7725	6.80029	0.815279	0.841143	0.78848	0.814967	1.43221	1.13398	1.17444	1.24688	0.653607	0.0103051
c39337_g1	ORF type:3prime_partial; len:274 1-744 (-)	3.23	1	1	1	248	27.8077	9.51025	0.864169	0.801524	0.836515	0.834069	1.28698	1.25703	1.29123	1.27841	0.652427	2.99389e-05
c48564_g1	ORF type:complete; len:128 612-995 (-)	6.3	1	1	1	127	13.91	7.12256	0.793323	0.853762	0.805614	0.817566	1.32218	1.19527	1.25387	1.25711	0.650355	0.000430907
c42429_g1	ORF type:5prime_partial; len:154 619-1080 (-)	6.54	1	1	4	153	16.9192	10.272	0.701763	0.792803	0.763909	0.752825	1.33518	0.929447	1.22228	1.1623	0.6477	0.0297599
c52171_g1	ORF type:complete; len:379 1525-2661 (-)	4.76	2	2	2	378	42.6326	5.73193	0.841604	0.834632	0.686949	0.787729	1.18945	1.36636	1.10514	1.22031	0.645513	0.00930198
c39380_g1	ORF type:complete; len:159 56-478 (+)	38.57	8	8	30	140	15.3386	4.2085	0.754249	0.806987	0.936733	0.832656	1.202	1.45377	1.24258	1.29945	0.640776	0.00797468
c40455_g1	ORF type:5prime_partial; len:368 157-1260 (-)	4.36	2	2	2	367	40.7794	8.36768	0.727569	0.728987	0.810735	0.755764	1.36518	1.00877	1.19379	1.18925	0.635498	0.0152299
c41979_g1	ORF type:complete; len:153 291-749 (+)	11.18	1	2	2	152	16.9214	8.92432	0.757934	0.813081	0.839134	0.803383	1.2823	1.36311	1.15598	1.26713	0.634017	0.00202345
c38994_g1	ORF type:complete; len:525 129-1703 (-)	3.63	2	2	2	524	57.4847	6.7417	0.824713	0.812969	0.802409	0.813364	1.43965	1.18009	1.23893	1.28622	0.632367	0.00388686
c52234_g1	ORF type:complete; len:750 136-2385 (-)	0.93	1	1	2	749	84.5668	7.60596	0.89808	0.890902	0.800413	0.863131	1.51745	1.28179	1.30366	1.36763	0.631115	0.00345879
c50748_g1	ORF type:complete; len:513 1054-2592 (-)	15.04	8	8	11	512	57.9733	8.82178	0.759448	0.795002	0.705335	0.753262	1.17212	1.1812	1.22733	1.19355	0.631109	0.00014585
c50569_g1	ORF type:complete; len:707 70-2190 (+)	8.5	3	6	45	706	78.8229	8.44092	0.804112	0.790432	0.785403	0.793315	1.21627	1.33261	1.22453	1.2578	0.630715	0.000254395
c43207_g1	ORF type:complete; len:209 413-1039 (-)	3.37	1	1	1	208	23.3481	9.40771	0.814081	0.775962	0.864865	0.818302	1.51607	1.15027	1.2352	1.30051	0.629215	0.0131704
c45568_g2	ORF type:5prime_partial; len:111 2-334 (+)	47.27	6	7	25	110	12.2522	5.45264	0.787843	0.824564	0.87901	0.830472	1.42314	1.32711	1.21662	1.32229	0.628055	0.00166215
c44571_g1	ORF type:internal; len:381 1-1140 (-)	5.26	2	2	3	380	43.2898	8.74854	0.798912	0.790162	0.797208	0.795427	1.36251	1.31206	1.14282	1.27246	0.625108	0.00199863
c28287_g1	ORF type:complete; len:322 121-966 (+)	3.56	1	1	1	281	31.2206	5.69385	0.750389	0.793952	0.754118	0.766153	1.30948	1.30088	1.06836	1.22624	0.624798	0.00457369
c45058_g1	ORF type:complete; len:171 426-938 (-)	27.65	4	4	6	170	19.3411	8.79248	0.750183	0.766312	0.799467	0.771987	1.22037	1.27362	1.21632	1.23677	0.624197	3.84213e-05
c41098_g1	ORF type:5prime_partial; len:241 2-724 (+)	16.25	4	5	7	240	27.2306	7.97217	0.847514	0.77766	0.740409	0.788528	1.24519	1.34853	1.20075	1.26482	0.623429	0.000903371
c44734_g3	ORF type:5prime_partial; len:318 1-954 (+)	51.42	14	15	40	317	35.4393	9.12939	0.792283	0.668835	0.759827	0.740315	1.16389	1.3868	1.0435	1.19806	0.617926	0.0129235
c44274_g1	ORF type:complete; len:591 256-2028 (+)	1.02	1	1	1	590	66.1406	7.75244	0.883085	0.791629	0.710443	0.795052	1.30344	1.2388	1.32673	1.28966	0.616484	0.000930831
c34401_g1	ORF type:complete; len:342 88-1026 (+)	7.37	3	3	3	312	35.704	5.33838	0.825097	0.822023	0.850118	0.832413	1.48521	1.53714	1.04791	1.35675	0.613533	0.0279379
c52679_g1	ORF type:complete; len:897 295-2781 (-)	5.92	3	6	7	828	94.0637	8.80713	0.744728	0.753728	0.748384	0.748947	1.22297	1.20016	1.27439	1.23251	0.607661	2.58523e-05
c46346_g1	ORF type:complete; len:352 89-1144 (+)	10.83	4	4	7	351	38.2362	6.44287	0.906078	0.851124	0.751064	0.836088	1.55216	1.30834	1.28419	1.38156	0.605176	0.00489279
c52498_g1	ORF type:complete; len:1083 285-3533 (+)	4.9	4	6	7	1082	122.157	7.02002	0.84028	0.686944	0.735392	0.754205	1.30709	1.24691	1.19284	1.24895	0.603874	0.00090641
c35048_g1	ORF type:5prime_partial; len:777 2-2332 (+)	3.87	4	5	25	776	84.6336	7.21045	0.717103	0.771427	0.749483	0.746005	1.46057	1.21173	1.05542	1.24258	0.60037	0.014007
c48115_g1	ORF type:complete; len:205 44-658 (+)	9.31	2	2	2	204	21.7821	9.18799	0.784372	0.790769	0.967572	0.847571	1.56634	1.35524	1.3813	1.43429	0.590933	0.00280584
c50763_g2	ORF type:complete; len:331 151-1143 (+)	2.12	1	1	1	330	36.8067	4.94482	0.79605	0.784721	0.789003	0.789925	1.64864	1.19547	1.2325	1.35887	0.581309	0.0173172
c46443_g5	ORF type:5prime_partial; len:167 1-501 (+)	15.06	3	3	5	166	18.6596	8.85107	0.781018	0.69532	0.738801	0.73838	1.21528	1.44719	1.17532	1.27927	0.57719	0.00359664
c42267_g1	ORF type:complete; len:394 489-1670 (+)	68.7	11	19	79	393	42.8467	5.8208	0.804032	0.757879	0.729713	0.763875	1.29352	1.43654	1.25096	1.32701	0.575638	0.000725488
c46039_g1	ORF type:complete; len:481 684-2126 (+)	11.25	5	5	7	480	53.5669	7.72314	0.836901	0.835902	0.673782	0.782195	1.26072	1.31116	1.51495	1.36228	0.574182	0.00360549
c51176_g1	ORF type:complete; len:604 248-2059 (+)	2.32	1	2	2	603	67.1883	6.15088	0.721868	0.675736	0.858336	0.75198	1.14927	1.46166	1.32851	1.31314	0.572656	0.0060734
c44576_g1	ORF type:complete; len:177 43-573 (+)	8.52	1	2	2	176	18.9316	8.86572	0.675291	0.91088	0.747269	0.777813	1.47237	1.20444	1.44058	1.37246	0.566728	0.00558661
c46875_g1	ORF type:complete; len:459 350-1726 (+)	13.1	6	6	10	458	50.3553	9.64209	0.754186	0.731328	0.701122	0.728879	1.30748	1.30526	1.25619	1.28964	0.565179	1.6005e-05
c46443_g4	ORF type:3prime_partial; len:300 89-985 (+)	24.08	7	7	11	299	32.1387	4.71631	0.779552	0.72041	0.681173	0.727045	1.31811	1.42519	1.16078	1.30136	0.55868	0.00218129
c50989_g1	ORF type:complete; len:867 507-3107 (-)	4.5	4	4	6	866	97.116	6.16357	0.79679	0.771754	0.748845	0.772463	1.34599	1.26106	1.5443	1.38379	0.558224	0.00198509
c48106_g1	ORF type:complete; len:351 175-1227 (+)	6	1	2	2	350	40.3717	8.67529	0.880626	0.673468	0.664735	0.73961	1.40899	1.23235	1.55817	1.39983	0.528355	0.00495668
c42865_g1	ORF type:complete; len:358 1769-2842 (+)	8.68	4	4	4	357	39.232	10.1108	0.770038	0.756216	0.63179	0.719348	1.38656	1.32711	1.44718	1.38695	0.518654	0.000283246
c43942_g1	ORF type:complete; len:140 230-649 (+)	7.91	1	1	1	139	15.0747	8.104	0.677649	0.510878	0.749103	0.645877	1.28523	1.27788	1.30523	1.28945	0.500895	0.000823352
c47727_g1	ORF type:complete; len:117 425-775 (-)	5.17	1	1	1	116	13.0376	9.29053	0.631535	0.695061	0.687845	0.67148	1.79135	0.958376	1.36009	1.36994	0.490153	0.0443836
c38633_g2	ORF type:internal; len:113 2-337 (+)	5.36	1	1	1	112	12.192	9.34912	0.774417	0.680844	0.648201	0.701154	1.9741	1.26769	1.46254	1.56811	0.447134	0.0154636
c49619_g4	ORF type:3prime_partial; len:111 1-330 (-)	65.45	1	6	34	110	11.8969	5.45264	0.651236	0.673851	0.564237	0.629775	1.65609	1.53288	1.36167	1.51688	0.415177	0.000638158
