# Supplementary material for: Understanding the response in Pugionium cornutum (L.) Gaertn. seedling leaves under drought stress using transcriptome and proteome integrated analysis
Source: PeerJ. 2023 Apr 3;11:e15165. doi: 10.7717/peerj.15165 (PMC10078451; doi:10.7717/peerj.15165)
Supplement: Supplemental Information 8 [file peerj-11-15165-s008.xlsx]

## Sheet: Sheet1
	L1	L2	L3					L1	L2	L3
Leaves water potential	-1.62563	-2.30121	-2.70234				POD	1383.67	919.333	997.467
	L1	L2	L3					L1	L2	L3
Leaves Relative water content	81.324	84.2199	89.072				MDA	9.93548	15.8172	17.1183
	L1	L2	L3
proline content	90.5622	118.983	275.677
