# Supplementary material for: Understanding the response in Pugionium cornutum (L.) Gaertn. seedling leaves under drought stress using transcriptome and proteome integrated analysis
Source: PeerJ. 2023 Apr 3;11:e15165. doi: 10.7717/peerj.15165 (PMC10078451; doi:10.7717/peerj.15165)
Supplement: Supplemental Information 9 [file peerj-11-15165-s009.xlsx]

## Sheet: Sheet1
DGs					DPs
down		up			down		up
L2_L1	L3_L1	L2_L1	L3_L1		L2_L1	L3_L1	L2_L1	L3_L1
832	1246	2657	1057		c47298_g1	c50670_g1	c34978_g1	c41989_g1
c50389_g2	c49776_g2	c40460_g1	c40460_g1		c42764_g2	c28565_g2	c34220_g1	c49280_g1
c48398_g1	c51959_g1	c47769_g1	c47769_g1		c50277_g1	c52871_g1	c73841_g1	c30518_g1
c46870_g1	c38051_g1	c47945_g1	c50359_g1		c52694_g2	c49896_g1	c37616_g1	c42277_g1
c49698_g2	c42000_g1	c50359_g1	c42732_g1		c43891_g1	c4851_g2	c33652_g1	c34881_g1
c51816_g1	c38568_g1	c49561_g5	c42456_g3		c80782_g1	c51620_g1	c42671_g1	c41814_g2
c51816_g1	c40277_g1	c49072_g3	c44808_g1		c47548_g1	c48802_g1	c6863_g2	c40538_g1
c36028_g1	c48398_g1	c42456_g3	c49231_g1		c49047_g1	c35823_g1	c39008_g1	c36056_g1
c49124_g1	c37611_g1	c47880_g1	c39990_g1		c48951_g2	c48927_g1	c37995_g2	c51939_g1
c49124_g1	c42378_g1	c40437_g1	c42448_g1		c48865_g1	c47179_g1	c49280_g1	c37668_g1
c45420_g1	c48643_g2	c43789_g1	c42471_g1		c39628_g1	c50915_g1	c30518_g1	c34946_g2
c45420_g1	c47916_g1	c42000_g1	c47765_g5		c50569_g1	c49216_g1	c37668_g1	c50801_g2
c43955_g1	c47916_g1	c48442_g1	c47765_g5		c44209_g4	c49626_g2	c52085_g2	c44550_g1
c39561_g1	c46875_g1	c43208_g1	c46714_g1		c48179_g1	c48780_g1	c44697_g1	c39008_g1
c43878_g1	c51816_g1	c43208_g1	c52885_g3		c32972_g1	c29076_g1	c40397_g1	c50495_g1
c45313_g3	c51816_g1	c48193_g1	c51769_g4		c52466_g1	c38031_g1	c41814_g2	c39027_g1
c48821_g1	c43984_g1	c46152_g1	c50725_g1		c49552_g2	c36825_g1	c43179_g1	c46759_g1
c39489_g1	c49556_g1	c44808_g1	c50725_g1		c50656_g2	c39628_g1	c40128_g1	c39154_g1
c52581_g1	c51033_g1	c51772_g3	c49982_g1		c49428_g1	c47683_g2	c39154_g1	c41127_g1
c43152_g2	c47883_g1	c49375_g1	c49982_g1		c49923_g3	c43083_g2	c45969_g1	c49177_g2
c45168_g1	c48390_g2	c39087_g3	c40750_g1		c47953_g1	c48292_g1	c40538_g1	c39198_g1
c48378_g1	c48390_g2	c39726_g3	c46302_g2		c46875_g1	c33794_g1	c50685_g2	c42671_g1
c48933_g1	c26489_g1	c49569_g2	c46302_g2		c63724_g1	c39303_g1	c52215_g3	c37387_g1
c42413_g1	c50228_g1	c49231_g1	c51584_g1		c52430_g1	c41800_g1	c48544_g1	c37616_g1
c43360_g1	c43955_g1	c49728_g3	c43708_g1		c52592_g2	c46932_g4	c51939_g1	c42915_g1
c43360_g1	c51878_g1	c33789_g2	c43508_g2		c5694_g1	c38101_g1	c42508_g1	c6331_g1
c47790_g2	c51878_g1	c49072_g5	c50662_g4		c47819_g1	c36027_g1	c46235_g1	c72972_g1
c52152_g1	c41086_g2	c39087_g1	c45432_g1		c26847_g1	c48015_g1	c46409_g1	c50685_g2
c38101_g1	c39561_g1	c44313_g3	c45432_g1		c42378_g1	c45747_g1	c34946_g2	c34220_g1
c52441_g1	c45313_g3	c44313_g1	c43880_g1		c41920_g1	c45312_g1	c37387_g1	c43179_g1
c51400_g3	c33599_g2	c29727_g1	c52947_g1		c33641_g1	c48408_g2	c34731_g1	c34976_g1
c44278_g2	c48704_g4	c42471_g1	c52592_g3		c48333_g3	c43113_g1	c6331_g1	c46714_g1
c45795_g1	c39489_g1	c50722_g1	c43795_g1		c43745_g2	c51754_g1	c44550_g1	c47055_g1
c47530_g2	c52581_g1	c38356_g1	c47163_g2		c48416_g1	c52815_g2	c72972_g1	c48759_g1
c44700_g1	c44563_g1	c47100_g1	c46213_g1		c49211_g1	c51347_g1	c46494_g1	c44756_g1
c44700_g1	c43071_g1	c39632_g1	c46213_g1		c40931_g1	c48669_g2	c39318_g1	c43365_g2
c52241_g1	c41062_g1	c46714_g1	c50268_g1		c31218_g1	c49933_g2	c46943_g4	c6863_g2
c51134_g1	c43758_g2	c52885_g3	c48363_g3		c41200_g1	c42491_g1	c43585_g1	c44791_g1
c51134_g1	c48378_g1	c48864_g1	c36890_g3		c31560_g1	c44298_g3	c39892_g1	c41228_g1
c41972_g1	c48170_g1	c48864_g1	c49812_g1		c41098_g1	c50757_g6	c41462_g1	c33652_g1
c40498_g1	c43360_g1	c52834_g3	c47700_g1		c49304_g1	c51747_g1	c41668_g1	c35631_g1
c23159_g1	c43360_g1	c4404_g1	c52171_g1		c41024_g1	c39726_g1	c39489_g1	c41382_g2
c38485_g2	c28666_g1	c50437_g2	c52171_g1		c48564_g1	c51436_g2	c49177_g2	c50047_g1
c43178_g1	c47790_g2	c50437_g2	c52022_g1		c30654_g1	c49171_g2	c49791_g2	c43585_g1
c47596_g3	c50585_g1	c50437_g2	c52022_g1		c50981_g1	c51747_g3	c41738_g1	c50047_g2
c38659_g2	c52152_g1	c52836_g1	c52336_g1		c44977_g1	c31530_g1	c35631_g1	c50873_g3
c46535_g2	c52505_g3	c50407_g1	c46192_g1		c38957_g1	c46783_g1	c43365_g2	c34731_g1
c46535_g2	c34498_g1	c52324_g2	c40348_g2		c46733_g1	c49522_g2	c49313_g1	c50535_g1
c52306_g2	c38101_g1	c52324_g2	c47176_g2		c41979_g1	c48416_g1	c46714_g1	c40986_g1
c43871_g4	c48109_g2	c51470_g1	c51870_g2		c50427_g1	c48333_g3	c49032_g1	c37894_g1
c48094_g2	c42000_g2	c52954_g2	c51302_g1		c44775_g2	c29857_g1	c46759_g1	c41616_g1
c45313_g1	c51400_g3	c31813_g1	c51302_g1		c45090_g1	c52785_g1	c50495_g1	c42546_g1
c50989_g1	c37689_g1	c47168_g1	c52187_g1		c34884_g1	c37389_g2	c45151_g1	c41668_g1
c49679_g1	c41425_g1	c47168_g1	c47522_g1		c36028_g1	c49380_g1	c41228_g1	c49906_g2
c49679_g1	c48213_g1	c45828_g1	c49559_g1		c50110_g1	c38998_g2	c30851_g1	c51367_g2
c44681_g1	c51858_g1	c50437_g1	c52773_g2		c44830_g1	c45792_g1	c41506_g1	c41506_g1
c47392_g3	c45828_g2	c40510_g1	c50487_g1		c44085_g3	c46278_g1	c40986_g1	c40819_g3
c48106_g1	c45795_g1	c48919_g4	c50966_g2		c39726_g1	c49864_g1	c37894_g1	c47088_g1
c30654_g1	c47530_g2	c51769_g4	c47765_g1		c44274_g1	c43002_g1	c48759_g1	c46943_g4
c51155_g2	c47548_g1	c42046_g1	c37410_g1		c66382_g1	c36346_g1	c50047_g1	c42773_g1
c51155_g2	c40941_g2	c42046_g1	c43365_g2		c42491_g1	c42305_g1	c74516_g1	c37385_g1
c51155_g2	c44700_g1	c52468_g2	c50045_g1		c51580_g2	c51433_g1	c26390_g1	c42711_g2
c43427_g2	c44700_g1	c42547_g1	c50045_g1		c45089_g1	c50235_g3	c33116_g1	c35285_g1
c51146_g1	c49313_g5	c42699_g1	c16523_g2		c47066_g1	c49428_g1	c34007_g1	c40141_g1
c49607_g2	c52241_g1	c35228_g1	c16523_g1		c41369_g1	c45980_g1	c39198_g1	c46409_g1
c42856_g1	c49836_g1	c51800_g3	c49541_g4		c38994_g1	c51881_g1	c76173_g1	c48759_g2
c47764_g1	c47179_g1	c30497_g1	c50658_g1		c29443_g1	c34480_g1	c50591_g2	c52162_g2
c52193_g1	c51551_g2	c30821_g1	c52809_g2		c39337_g1	c51478_g1	c44791_g1	c36895_g1
c37040_g1	c48338_g5	c40750_g1	c48849_g1		c43782_g2	c52584_g1	c48579_g1	c27307_g1
c41035_g1	c39956_g1	c46302_g2	c44017_g2		c59725_g1	c49931_g1	c74671_g1	c45975_g2
c52001_g4	c35696_g2	c46302_g2	c34401_g1		c42267_g1	c66796_g1	c41931_g1	c46235_g1
c46591_g1	c34528_g1	c44313_g2	c52872_g1		c39380_g1	c39017_g1	c37009_g1	c44026_g1
c46048_g2	c45977_g2	c47621_g2	c40538_g1		c42865_g1	c45186_g2	c33948_g2	c26390_g1
c44485_g1	c45977_g2	c42393_g1	c46086_g2		c45899_g1	c35527_g1	c35214_g2	c37995_g2
c44485_g1	c48058_g1	c45536_g1	c34884_g1		c45568_g2	c50910_g1	c38926_g1	c41766_g1
c52666_g1	c48058_g1	c52385_g1	c49000_g1		c44576_g1	c49887_g1	c51374_g1	c49076_g1
c38417_g1	c46883_g1	c52385_g1	c49000_g1		c48106_g1	c49304_g1	c42292_g1	c48897_g1
c50755_g1	c51398_g2	c44559_g1	c45813_g1		c41062_g1	c52868_g1	c38671_g1	c41738_g1
c22565_g1	c47412_g1	c51930_g1	c39764_g1		c50989_g1	c41024_g1	c51259_g3	c38329_g2
c50040_g1	c41950_g1	c52258_g1	c45059_g2		c50763_g2	c50889_g1	c47838_g1	c38591_g1
c46904_g1	c52307_g2	c52258_g1	c48404_g1		c49679_g1	c33641_g1	c49906_g2	c52015_g1
c46904_g1	c46193_g1	c33357_g1	c48404_g1		c49619_g4	c45770_g1	c43799_g1	c51287_g1
c45370_g2	c23159_g1	c41242_g1	c46719_g1		c34401_g1	c50757_g2	c48338_g6	c41506_g2
c53772_g1	c38485_g2	c41242_g1	c29022_g1		c46346_g1	c66382_g1	c44026_g1	c44257_g1
c50244_g1	c41300_g4	c39027_g1	c50967_g4		c52234_g1	c50829_g1	c42711_g2	c47000_g1
c44736_g1	c41212_g1	c51551_g3	c52268_g4		c45006_g1	c35850_g2	c45279_g1	c47021_g1
c43303_g1	c44153_g2	c48900_g1	c40144_g1		c49085_g1	c43865_g1	c48759_g2	c32017_g1
c38089_g1	c38659_g2	c48900_g1	c34946_g2		c38633_g2	c31454_g1	c48897_g1	c76173_g1
c45033_g1	c43297_g1	c45191_g1	c43519_g1		c48115_g1	c32521_g1	c44183_g2	c45122_g1
c45033_g1	c50598_g1	c30713_g1	c41814_g2			c32933_g1	c48364_g2	c48199_g2
c43696_g1	c46535_g2	c48363_g1	c36433_g1			c46615_g4	c42289_g2	c48681_g1
c32938_g1	c46535_g2	c43880_g1	c51317_g1			c44250_g2	c52513_g1	c40992_g1
c41642_g1	c45564_g1	c50129_g4	c51317_g1			c46615_g1	c41506_g2	c43799_g1
c41969_g1	c34551_g1	c44977_g1	c26743_g2			c47450_g1	c49528_g3	c48129_g1
c34026_g2	c49593_g2	c52947_g1	c52273_g4			c43510_g1	c44157_g1	c6749_g1
c47989_g3	c40198_g1	c39143_g1	c42590_g1			c52043_g1	c49076_g1	c34007_g1
c47989_g3	c46528_g2	c49570_g1	c51923_g3			c38507_g2	c51797_g7	c49371_g1
c41782_g2	c35761_g1	c52592_g3	c47731_g1			c49184_g1	c44201_g2	c36857_g1
c41782_g2	c29053_g2	c45439_g1	c47731_g1			c37639_g1	c49955_g2	c43204_g1
c53017_g4	c41265_g1	c47163_g2	c46517_g2			c43081_g1	c35737_g1	c36817_g1
c46202_g6	c46235_g1	c39461_g1	c48799_g1			c33338_g1	c43188_g1	c37820_g1
c8566_g1	c42119_g1	c50268_g1	c42545_g3			c51551_g4	c36857_g1	c30851_g1
c43148_g1	c47018_g1	c52893_g2	c47533_g1			c50623_g1	c46600_g1	c40128_g1
c46913_g1	c46214_g1	c43344_g1	c51087_g3			c35495_g1	c40228_g2	c48338_g6
c48302_g2	c46735_g1	c50946_g4	c51087_g3			c42909_g1	c43387_g1	c50591_g2
c36868_g1	c48094_g2	c52746_g2	c47988_g2			c50228_g1	c42546_g1	c48468_g1
c51657_g1	c45313_g1	c52746_g2	c48125_g1			c48554_g1	c50047_g2	c46352_g1
c51657_g1	c6469_g1	c48363_g3	c39094_g1			c52043_g2		c47265_g1
c45615_g1	c47396_g1	c36359_g1	c48204_g1			c39412_g1		c39318_g1
c45615_g1	c43748_g1	c36359_g1	c49329_g1			c52102_g2		c40750_g2
c49802_g1	c43068_g2	c49812_g1	c42546_g1			c64174_g1		c43179_g3
c20406_g1	c52917_g1	c37151_g1	c30518_g1			c43366_g1		c52937_g1
c49028_g1	c50989_g1	c49156_g1	c44571_g1			c51580_g2		c45969_g1
c44819_g1	c30308_g1	c42634_g1	c47445_g2			c49126_g1		c35737_g1
c31434_g1	c47028_g1	c50975_g3	c46935_g1			c51659_g1		c41170_g1
c27015_g2	c25519_g1	c45690_g1	c42986_g1			c48733_g2		c42289_g2
c44448_g1	c41559_g1	c52336_g1	c42986_g1			c44977_g1		c42508_g1
c44276_g2	c38725_g1	c35521_g2	c46037_g3			c45870_g1		c48375_g1
c44276_g2	c44681_g1	c45500_g1	c42955_g1			c40683_g1		c31319_g1
c46340_g1	c33679_g2	c45589_g2	c51439_g1			c43782_g2		c45077_g1
c39407_g1	c46800_g1	c37948_g2	c34520_g2			c42378_g1		c48544_g1
c50445_g1	c50727_g1	c51690_g3	c36559_g1			c53011_g1		c40444_g1
c23706_g1	c45746_g2	c47176_g2	c40986_g1			c44106_g1		c45627_g1
c45642_g1	c46412_g1	c45037_g1	c45059_g1			c42452_g2		c47553_g2
c45642_g1	c43427_g2	c51870_g2	c49551_g1			c82065_g1		c49687_g2
c45568_g2	c48385_g1	c48919_g2	c49551_g1			c22565_g1		c35214_g2
c50707_g6	c51064_g1	c34239_g1	c44420_g1			c80782_g1		c42062_g1
c43532_g1	c48915_g3	c46053_g2	c44292_g1			c30654_g1		c52215_g3
c47904_g3	c47417_g3	c47635_g1	c40505_g1			c41568_g1		c51469_g4
c47904_g3	c32396_g1	c47635_g1	c40993_g1			c41398_g1		c50147_g2
c47904_g3	c29053_g1	c48445_g1	c35631_g1			c48148_g2		c45334_g1
c46973_g1	c50915_g1	c35654_g1	c47146_g1			c52430_g1		c47249_g1
c32267_g1	c47573_g1	c51286_g2	c37888_g1			c40931_g1		c41931_g1
c36093_g1	c42856_g1	c39389_g2	c45813_g2			c39540_g1		c48364_g2
c51788_g2	c47764_g1	c37755_g1	c41849_g1			c43453_g1		c36035_g1
c50595_g1	c48106_g2	c51797_g7	c43953_g1			c48179_g1		c40228_g2
c50595_g1	c50959_g1	c44218_g1	c41849_g2			c49619_g1		c42296_g1
c50297_g8	c35072_g2	c47522_g1	c51260_g1			c44209_g4		c44437_g1
c50297_g8	c50510_g2	c52084_g2	c52273_g1			c37633_g1		c30180_g1
c50297_g8	c45895_g1	c46970_g2	c51969_g3			c34498_g1		c49027_g1
c50297_g8	c47313_g4	c44767_g1	c50377_g1			c39912_g1		c48477_g1
c46114_g1	c47313_g4	c37197_g1	c50377_g1			c46959_g1		c43656_g2
c46114_g1	c39936_g2	c50969_g1	c48753_g2			c44085_g3		c50421_g3
c49367_g2	c43333_g2	c50966_g2	c52198_g1			c48865_g1		c33948_g2
c49367_g2	c48683_g1	c47765_g1	c39501_g1			c39192_g1		c51439_g1
c38706_g2	c41655_g1	c49716_g3	c44430_g1			c41920_g1		c47205_g6
c45991_g1	c37040_g1	c45281_g1	c36089_g1			c40420_g1		c43648_g1
c48020_g1	c49778_g1	c29834_g1	c47021_g1			c47983_g2		c51855_g1
c48020_g1	c41035_g1	c49476_g1	c47021_g1			c41642_g2		c50814_g2
c29658_g1	c43366_g1	c49881_g2	c47426_g2			c52446_g1		c48655_g1
c43061_g2	c50914_g1	c16523_g2	c47426_g2			c41436_g1		c52928_g1
c43061_g2	c50914_g1	c52534_g1	c37788_g1			c49886_g2		c52809_g1
c51297_g1	c50914_g1	c41269_g2	c51939_g1			c44737_g1		c52513_g1
c51297_g1	c32903_g1	c45383_g4	c48631_g1			c45993_g1		c50967_g3
c41284_g1	c52001_g4	c45179_g1	c47966_g1			c34884_g1		c39410_g1
c48351_g1	c46591_g1	c48133_g1	c42915_g1			c47953_g1		c42510_g1
c48351_g1	c46080_g1	c52809_g2	c47566_g1			c50829_g2		c48833_g1
c48351_g1	c46080_g1	c51930_g3	c47566_g1			c50427_g1		c43357_g1
c38769_g1	c44336_g1	c41281_g1	c43517_g1			c50110_g1		c47838_g1
c52067_g1	c44336_g1	c41281_g1	c40363_g1			c29443_g1		c48255_g1
c52067_g1	c50866_g1	c44017_g2	c40737_g1			c52592_g2		c43273_g1
c40523_g1	c46048_g2	c47184_g7	c49826_g5			c43406_g1		c51791_g1
c49483_g3	c46104_g2	c52385_g3	c37073_g1			c37689_g1		c37213_g1
c12193_g1	c44485_g1	c48919_g1	c8795_g1			c44551_g1		c46681_g1
c52238_g1	c44485_g1	c35521_g1	c39892_g1			c49166_g1		c45199_g1
c46595_g1	c52666_g1	c51195_g1	c49743_g1			c40609_g1		c45874_g2
c42123_g2	c44394_g4	c42466_g1	c45794_g1			c43891_g1		c47552_g1
c33191_g1	c32931_g1	c45580_g1	c44516_g1			c49552_g2		c37009_g1
c50255_g1	c50755_g1	c47059_g1	c44516_g1			c45089_g1		c48898_g1
c50255_g1	c35626_g1	c38827_g1	c47614_g2			c51631_g1		c51141_g1
c50255_g1	c35626_g1	c42499_g1	c47614_g2			c47633_g1		c43671_g1
c50255_g1	c22565_g1	c46053_g3	c47757_g3			c51453_g1		c43202_g1
c50255_g1	c45370_g2	c47176_g1	c47757_g3			c47819_g1		c48249_g3
c50255_g1	c53772_g1	c48759_g1	c51867_g1			c42547_g1		c68945_g1
c50255_g1	c51988_g1	c50495_g1	c38031_g1			c46718_g1		c72376_g1
c50255_g1	c51789_g2	c50495_g1	c51260_g2			c52963_g2		c39900_g2
c45818_g1	c51831_g1	c49072_g2	c52499_g2			c42764_g2		c49024_g1
c39433_g1	c51831_g1	c40538_g1	c49550_g2			c49211_g1		c42175_g2
c49441_g2	c50324_g1	c34884_g1	c42921_g1			c47298_g1		c50569_g2
c46383_g1	c44736_g1	c51156_g1	c46877_g1			c48556_g2		c47580_g1
c44717_g3	c41126_g1	c49009_g3	c26255_g1			c47548_g1		c46861_g1
c23843_g1	c43303_g1	c51243_g1	c29537_g1			c42994_g3		c50425_g1
c23843_g1	c47192_g1	c48912_g2	c34444_g1			c34254_g1		c50729_g1
c34717_g1	c47192_g1	c50906_g3	c52477_g2			c46642_g1		c28867_g1
c40338_g2	c47326_g3	c43856_g1	c40122_g1			c47066_g1		c42682_g1
c37208_g1	c52063_g2	c43856_g1	c45180_g3			c50277_g1		c46489_g1
c27090_g1	c45588_g1	c47417_g1	c35336_g1			c31560_g1		c43320_g1
c49103_g1	c45588_g1	c39764_g1	c32064_g1			c52559_g1		c40344_g1
c49103_g1	c43696_g1	c31773_g1	c32064_g1			c52826_g1		c52175_g1
c45806_g1	c32938_g1	c44422_g1	c40894_g1			c50981_g1		c47760_g1
c46279_g1	c41013_g1	c45059_g2	c40894_g1			c38481_g1		c48919_g1
c44663_g1	c46926_g1	c48348_g3	c74655_g1			c36028_g1		c44469_g1
c49700_g1	c44279_g1	c48118_g3	c51930_g2			c37684_g1		c49164_g1
c47536_g1	c41642_g1	c45077_g1	c47966_g2			c46465_g1		c36305_g1
c49730_g4	c35850_g2	c29022_g1	c37976_g1			c34317_g1		c47194_g1
c49730_g4	c45654_g1	c50650_g1	c48221_g1			c43717_g1		c47753_g2
c48974_g1	c45654_g1	c45180_g4	c48221_g1			c41491_g2		c5683_g1
c48974_g1	c41942_g1	c42063_g2	c50535_g1			c41369_g1		c51002_g1
c51868_g1	c45330_g1	c47323_g1	c50535_g1			c34253_g1		c41895_g1
c51868_g1	c52954_g1	c52594_g1	c48128_g3			c42807_g1		c42551_g1
c42190_g1	c52954_g1	c50967_g4	c50198_g1			c48951_g2		c48009_g7
c42267_g1	c44752_g1	c52268_g4	c50198_g1			c38341_g2		c45279_g1
c47657_g2	c49313_g1	c46417_g1	c41387_g2			c50593_g4		c37249_g1
c54558_g1	c40443_g1	c40144_g1	c35720_g1			c45090_g1		c46600_g1
c26439_g1	c46340_g2	c38147_g1	c46274_g6			c45899_g1		c41433_g1
c46281_g2	c42427_g3	c49408_g1	c41382_g2			c52694_g2		c45614_g1
c48725_g1	c42865_g1	c49408_g1	c45434_g3			c31218_g1		c51799_g1
c48725_g1	c42865_g1	c48013_g2	c43048_g1			c32972_g1		c49073_g1
c52705_g1	c52431_g2	c36716_g1	c41814_g1			c49085_g1		c52006_g1
c52705_g1	c52956_g1	c49969_g1	c47004_g2			c42764_g1		c48687_g2
c49028_g2	c52956_g1	c49969_g1	c42649_g1			c50805_g1		c51752_g1
c49028_g2	c41969_g1	c34946_g2	c49882_g1			c44164_g1		c49636_g1
c49028_g2	c45383_g2	c42237_g4	c41263_g2			c51344_g1		c52926_g1
c49028_g2	c48550_g2	c48548_g3	c41263_g2			c37921_g1		c37907_g1
c49028_g2	c30767_g1	c48548_g3	c50488_g2			c41062_g1		c13900_g2
c49028_g2	c45225_g1	c47578_g1	c16159_g1			c63724_g1		c50658_g1
c49028_g2	c35236_g1	c42048_g1	c51497_g7			c46694_g1		c40645_g1
c43230_g1	c36593_g1	c42048_g1	c47406_g1			c46338_g1		c51856_g1
c4738_g2	c34026_g2	c43647_g2	c39661_g1			c50376_g4		c47514_g1
c48820_g1	c49061_g2	c41814_g2	c50873_g2			c39337_g1		c48109_g1
c25479_g1	c41435_g2	c36328_g1	c49105_g1			c48564_g1		c43859_g2
c50177_g1	c43081_g1	c52389_g1	c46881_g1			c42429_g1		c44638_g2
c48999_g1	c42889_g1	c40067_g1	c32776_g1			c52171_g1		c47289_g1
c48999_g1	c41782_g2	c40067_g1	c46760_g3			c39380_g1		c50801_g1
c41545_g1	c41782_g2	c49224_g1	c35727_g1			c40455_g1		c17864_g1
c73640_g1	c51830_g1	c49268_g1	c47290_g2			c41979_g1		c48848_g1
c48817_g2	c51830_g1	c48436_g1	c48691_g1			c38994_g1		c31874_g1
c50961_g2	c50095_g1	c50428_g1	c48691_g1			c52234_g1		c49412_g1
c24994_g1	c45141_g2	c50018_g2	c49362_g1			c50748_g1		c39756_g1
c46027_g1	c40075_g2	c49838_g2	c49362_g1			c50569_g1		c77975_g1
c44904_g2	c51962_g1	c48118_g1	c50982_g1			c43207_g1
c43152_g1	c51962_g1	c48129_g1	c37219_g1			c45568_g2
c43152_g1	c51962_g1	c43082_g1	c506_g1			c44571_g1
c50092_g1	c51962_g1	c52318_g1	c35476_g1			c28287_g1
c41098_g1	c43042_g2	c45631_g1	c39154_g1			c45058_g1
c35348_g1	c47954_g1	c52273_g4	c43039_g3			c41098_g1
c35894_g1	c45532_g1	c51864_g1	c51261_g1			c44734_g3
c37329_g2	c8566_g1	c51923_g3	c39654_g1			c44274_g1
c48814_g2	c51948_g1	c51917_g2	c47616_g3			c34401_g1
c48814_g2	c51948_g1	c38874_g1	c44483_g1			c52679_g1
c48814_g2	c48697_g1	c50048_g1	c40278_g1			c46346_g1
c33885_g1	c48697_g1	c72854_g1	c44232_g1			c52498_g1
c51160_g2	c43148_g1	c40607_g1	c40738_g1			c35048_g1
c49292_g2	c49564_g1	c48544_g3	c51197_g1			c48115_g1
c46492_g1	c51196_g2	c49200_g2	c51197_g1			c50763_g2
c46492_g1	c52869_g1	c51738_g3	c51197_g1			c46443_g5
c43460_g1	c49194_g2	c51738_g3	c46619_g1			c42267_g1
c46932_g2	c42989_g1	c52394_g3	c47836_g1			c46039_g1
c46932_g2	c36868_g1	c43540_g1	c47836_g1			c51176_g1
c49355_g8	c46033_g1	c50459_g2	c36165_g1			c44576_g1
c46282_g1	c52076_g1	c34112_g1	c49909_g1			c46875_g1
c46282_g1	c51657_g1	c46838_g1	c49909_g1			c46443_g4
c45985_g5	c51657_g1	c46471_g4	c34364_g1			c50989_g1
c52165_g1	c49802_g1	c42545_g3	c51002_g1			c48106_g1
c52482_g1	c39102_g3	c48805_g2	c50401_g1			c42865_g1
c52482_g1	c30459_g1	c51087_g3	c50401_g1			c43942_g1
c46279_g2	c31434_g1	c51087_g3	c48665_g1			c47727_g1
c46279_g2	c50522_g1	c40220_g1	c50801_g2			c38633_g2
c46279_g2	c49737_g2	c43580_g1	c49585_g1			c49619_g4
c46058_g2	c45845_g2	c47638_g1	c41093_g1
c46444_g1	c41851_g1	c50967_g2	c44224_g1
c41984_g1	c41851_g1	c51627_g1	c52493_g1
c52798_g1	c42597_g1	c36006_g1	c52493_g1
c52798_g1	c52351_g3	c34921_g1	c52049_g1
c46637_g1	c40491_g2	c48514_g1	c46539_g1
c46637_g1	c46942_g4	c45943_g1	c46539_g1
c46637_g1	c46942_g4	c45943_g1	c34098_g1
c52859_g1	c19366_g2	c46912_g1	c46943_g4
c52859_g1	c52734_g2	c52570_g3	c31713_g1
c52859_g1	c44782_g1	c38116_g1	c45522_g1
c50422_g1	c44521_g2	c48867_g1	c45522_g1
c50422_g1	c46278_g1	c52555_g4	c39900_g2
c50422_g1	c48317_g1	c52555_g4	c42656_g1
c42822_g1	c46340_g1	c36059_g2	c46968_g2
c38906_g2	c30078_g1	c51535_g2	c50386_g1
c46383_g5	c51730_g1	c42546_g1	c50386_g1
c52095_g3	c50445_g1	c37277_g1	c41657_g2
c40174_g1	c45642_g1	c48862_g1	c49176_g1
c42459_g1	c45642_g1	c30518_g1	c46620_g1
c44614_g1	c41563_g1	c44571_g1	c49584_g1
c36243_g1	c50701_g2	c42977_g1	c45598_g1
c47112_g4	c51903_g1	c33008_g1	c42976_g3
c47112_g4	c51903_g1	c47972_g1	c34479_g1
c47112_g4	c43127_g1	c47972_g1	c47510_g1
c47112_g4	c32218_g1	c38534_g1	c48490_g1
c47112_g4	c27217_g1	c48118_g2	c49456_g1
c47112_g4	c43820_g1	c48118_g2	c49456_g1
c47112_g4	c43532_g1	c48438_g1	c45375_g3
c46833_g1	c51729_g1	c47445_g2	c44769_g1
c46833_g1	c48269_g1	c46935_g1	c44769_g1
c43165_g2	c48269_g1	c41260_g1	c42807_g1
c47303_g1	c36901_g1	c41297_g2	c51690_g6
c47303_g1	c43083_g2	c47970_g1	c65505_g1
c48737_g1	c46973_g1	c42986_g1	c46531_g1
c48737_g1	c44622_g1	c42986_g1	c39335_g1
c43279_g1	c25232_g1	c45821_g1	c15450_g1
c43279_g1	c36093_g1	c47707_g1	c40141_g1
c48817_g1	c43024_g3	c38874_g3	c45357_g1
c48817_g1	c39692_g1	c42955_g1	c27810_g1
c44648_g1	c51788_g2	c47545_g1	c48444_g2
c31529_g1	c73817_g1	c51768_g1	c39429_g2
c48874_g1	c33765_g2	c51439_g1	c43274_g1
c41876_g2	c48907_g2	c34520_g2	c43274_g1
c52227_g1	c39686_g1	c47844_g1	c37130_g1
c52227_g1	c52249_g1	c41297_g1	c46707_g1
c51049_g1	c52249_g1	c2120_g1	c46175_g1
c51049_g1	c46114_g1	c36559_g1	c49440_g1
c51049_g1	c46114_g1	c51333_g1	c42719_g1
c36440_g2	c45177_g1	c40986_g1	c45773_g1
c42134_g1	c38706_g2	c45059_g1	c52761_g3
c45605_g1	c35520_g1	c49551_g1	c45123_g1
c37148_g1	c31896_g1	c49551_g1	c38038_g1
c50226_g2	c34333_g1	c34824_g1	c44138_g2
c37443_g1	c48020_g1	c44420_g1	c51732_g1
c52737_g1	c48020_g1	c44292_g1	c39019_g1
c52737_g1	c29658_g1	c44013_g1	c39019_g1
c52737_g1	c46766_g1	c36517_g1	c42976_g2
c3200_g1	c47807_g2	c40505_g1	c43254_g2
c39561_g2	c47807_g2	c43555_g1	c51769_g2
c48952_g2	c38020_g1	c48735_g1	c45259_g1
c50262_g1	c13550_g1	c48557_g1	c45259_g1
c48057_g1	c49818_g2	c48557_g1	c36655_g1
c51062_g1	c46021_g1	c48272_g1	c44947_g2
c45220_g1	c46021_g1	c44931_g1	c35421_g1
c42639_g1	c41284_g1	c46528_g5	c52953_g2
c38312_g2	c43250_g1	c44715_g1	c37464_g1
c28807_g1	c50624_g1	c40993_g1	c31637_g2
c40207_g2	c48351_g1	c42343_g1	c52146_g2
c48671_g4	c48351_g1	c52753_g1	c33826_g1
c43784_g1	c48351_g1	c48514_g2	c50660_g3
c37470_g2	c50314_g1	c37888_g1	c50771_g1
c49044_g2	c15702_g1	c47445_g1	c49560_g1
c46599_g1	c51746_g1	c52590_g2	c41771_g1
c46599_g1	c49578_g7	c52590_g2	c42976_g1
c40277_g2	c38769_g1	c50674_g1	c40660_g1
c52860_g1	c21190_g1	c45813_g2	c35661_g1
c47539_g3	c78585_g1	c46151_g5	c37071_g3
c33468_g1	c45475_g2	c51610_g1	c50660_g2
c47875_g1	c33714_g1	c52906_g1	c38641_g1
c47875_g1	c43734_g2	c41849_g1	c52656_g1
c47875_g1	c52709_g1	c43953_g1	c52656_g1
c44764_g2	c52709_g1	c45976_g1	c39775_g1
c39452_g1	c47847_g1	c52271_g2	c35214_g2
c80947_g1	c12193_g1	c33077_g1	c50792_g1
c35045_g1	c50293_g1	c41849_g2	c47882_g2
c38659_g1	c44269_g1	c49652_g2	c45578_g1
c47052_g1	c18831_g1	c49794_g2	c47791_g1
c39956_g2	c46595_g1	c50335_g2	c50508_g1
c42202_g1	c37919_g1	c51260_g1	c50508_g1
c45337_g2	c50387_g1	c49753_g2	c45597_g1
c45337_g2	c51386_g1	c40220_g2	c45597_g1
c49573_g1	c28496_g2	c52273_g1	c45597_g1
c49573_g1	c49638_g1	c47348_g1	c43316_g1
c46869_g1	c48648_g5	c50674_g2	c49162_g1
c23887_g1	c79521_g1	c52087_g3	c50668_g1
c51127_g2	c32189_g2	c49844_g4	c48071_g1
c49479_g1	c49744_g2	c47319_g1	c49748_g1
c45926_g1	c33191_g1	c49794_g1	c47371_g1
c37222_g1	c39242_g1	c46072_g1	c51931_g3
c35072_g1	c46742_g1	c46072_g1	c51931_g3
c44956_g1	c45818_g1	c52936_g2	c34881_g1
c44956_g1	c39433_g1	c48338_g7	c42952_g2
c45722_g2	c49441_g2	c50502_g5	c48075_g1
c39345_g1	c46177_g1	c17620_g1	c47743_g1
c38008_g1	c50053_g1	c51157_g2	c47743_g1
c46138_g1	c52761_g1	c52198_g1	c74490_g1
c34999_g1	c34717_g1	c43416_g1	c51825_g1
c43546_g2	c37119_g1	c43832_g1	c43366_g2
c71787_g1	c49402_g3	c47426_g2	c47205_g6
c31521_g1	c49130_g1	c47426_g2	c35476_g3
c44668_g4	c49130_g1	c37788_g1	c31637_g3
c44215_g1	c31381_g1	c44074_g1	c51304_g1
c48845_g1	c44377_g2	c42201_g1	c50012_g1
c46104_g5	c40338_g2	c47157_g5	c40698_g1
c27035_g1	c39069_g1	c47966_g1	c48513_g1
c64399_g1	c36752_g2	c36728_g1	c48513_g1
c51463_g1	c27090_g1	c41609_g1	c37816_g1
c38631_g2	c40730_g2	c42915_g1	c40880_g1
c38644_g2	c46675_g1	c48611_g1	c50210_g1
c46442_g1	c46575_g1	c49251_g1	c50210_g1
c46442_g1	c46575_g1	c40737_g1	c40809_g2
c46442_g1	c51887_g3	c39022_g1	c46174_g1
c46442_g1	c44090_g1	c49137_g3	c46174_g1
c38425_g1	c49103_g1	c49137_g3	c46263_g2
c38425_g1	c49103_g1	c42730_g1	c44124_g1
c38425_g1	c48252_g1	c50252_g1	c44263_g2
c47117_g1	c41525_g2	c50252_g1	c44263_g2
c47117_g1	c51097_g1	c46793_g1	c52904_g1
c35699_g1	c49321_g1	c50514_g1	c45992_g2
c46629_g2	c49059_g2	c49743_g1	c52695_g1
c43378_g1	c46279_g1	c36334_g1	c52695_g1
c39885_g1	c44663_g1	c52331_g1	c52707_g4
c38220_g1	c47536_g1	c42218_g1	c42559_g2
c45904_g4	c40389_g2	c44822_g1	c50047_g2
c42994_g1	c46292_g1	c47614_g2	c48773_g1
c45389_g2	c49584_g5	c47614_g2	c48773_g1
c39397_g2	c52584_g1	c37710_g1	c52425_g3
c50977_g2	c51868_g1	c37710_g1	c52425_g3
c42728_g1	c51868_g1	c48581_g1	c48586_g1
c52736_g2	c42267_g1	c47757_g3	c47323_g2
c52736_g2	c40244_g1	c47757_g3	c47323_g2
c36964_g1	c40244_g1	c47401_g1	c37918_g1
c52413_g2	c44799_g1	c47401_g1	c47904_g1
c48069_g1	c47657_g2	c50762_g1	c51419_g1
c48069_g1	c68732_g1	c50762_g1	c51419_g1
c48724_g1	c45859_g3	c41834_g2	c47513_g2
c74495_g1	c38819_g1	c41834_g2	c47513_g2
c47809_g5	c54558_g1	c38031_g1	c52425_g2
c37296_g1	c50582_g1	c51260_g2	c49807_g1
c52999_g1	c47574_g1	c40150_g3	c49807_g1
c52999_g1	c44191_g2	c51394_g1	c51991_g1
c44825_g1	c49455_g1	c52744_g2	c51595_g1
c46662_g1	c74707_g1	c52744_g2	c39670_g1
c46662_g1	c48556_g2	c52744_g2	c42875_g2
c46662_g1	c46631_g1	c10966_g1	c52809_g1
c45051_g2	c46631_g1	c43549_g1	c52809_g1
c35763_g1	c37429_g2	c44160_g2	c52809_g1
c69852_g1	c42039_g1	c38526_g1	c51479_g1
c69852_g1	c45401_g1	c43005_g2	c51479_g1
c51809_g4	c52705_g1	c22578_g1	c28328_g1
c27712_g2	c52705_g1	c52499_g2	c51759_g1
c50720_g1	c52862_g1	c52508_g5	c51759_g1
c48057_g2	c42244_g1	c42921_g1	c50533_g2
c47675_g1	c33532_g1	c46563_g2	c40740_g1
c47675_g1	c14545_g1	c49432_g2	c41405_g2
c44410_g1	c30767_g2	c26255_g1	c40867_g1
c52079_g3	c52820_g1	c29537_g1	c52652_g1
c47320_g2	c52820_g1	c50934_g4	c47435_g1
c47320_g2	c52820_g1	c34444_g1	c32348_g2
c47320_g2	c49401_g3	c40557_g1	c51172_g1
c47320_g2	c49257_g1	c52477_g2	c41667_g1
c49060_g2	c44191_g1	c39721_g1	c51378_g1
c39796_g2	c44904_g1	c51755_g2	c51378_g1
c42287_g2	c49313_g2	c32064_g1	c51755_g3
c35278_g1	c49313_g2	c32064_g1	c44870_g1
c40413_g1	c47006_g1	c41350_g1	c44669_g1
c40413_g1	c22222_g1	c44607_g1	c51937_g2
c40413_g1	c50177_g1	c43574_g1	c49934_g1
c51544_g3	c40263_g1	c49894_g1	c31828_g1
c51685_g2	c52364_g1	c39351_g1	c50271_g1
c52326_g3	c52364_g1	c35961_g1	c50271_g1
c44610_g1	c52743_g1	c51355_g2	c40769_g1
c44620_g1	c41545_g1	c46576_g1	c40769_g1
c23991_g1	c51321_g1	c36804_g1	c38660_g1
c23187_g1	c46354_g1	c52528_g1	c45148_g1
c39255_g1	c46354_g1	c40894_g1	c47062_g2
c34000_g1	c24994_g1	c40894_g1	c37200_g1
c46700_g1	c44904_g2	c41250_g2	c70358_g1
c44710_g4	c40638_g1	c74655_g1	c44465_g1
c44332_g2	c52896_g1	c45646_g1	c44465_g1
c39491_g1	c52896_g1	c52138_g2	c45681_g1
c47149_g1	c52896_g1	c36228_g1	c42346_g1
c47149_g1	c50092_g1	c47966_g2	c48163_g1
c39162_g1	c42428_g1	c48989_g3	c46492_g2
c48889_g1	c50148_g1	c37976_g1	c46492_g2
c39959_g1	c50148_g1	c25202_g2	c49351_g2
c50593_g5	c16994_g1	c41589_g1	c44699_g2
c50593_g5	c41098_g1	c45194_g1	c44091_g3
c43929_g1	c25309_g1	c52001_g1	c42473_g2
c26747_g1	c35894_g1	c44551_g2	c52963_g2
c35599_g1	c48543_g1	c37998_g1	c52963_g2
c35599_g1	c48543_g1	c43224_g1	c46876_g1
c35599_g1	c37329_g2	c52725_g1	c41962_g1
c40307_g1	c52217_g2	c43809_g3	c41572_g1
c48360_g2	c48814_g2	c44298_g1	c31703_g1
c51214_g1	c48814_g2	c48221_g1	c39178_g1
c51214_g1	c48814_g2	c48221_g1	c52790_g1
c52691_g1	c34318_g1	c51094_g1	c39773_g3
c41521_g1	c38349_g1	c50535_g1	c46253_g2
c37645_g1	c37525_g1	c50535_g1	c46312_g3
c40452_g1	c33885_g1	c47343_g1	c47104_g2
c40452_g1	c33095_g1	c45674_g1	c52319_g2
c41748_g1	c40382_g2	c50486_g1	c52319_g2
c47786_g1	c46492_g1	c50896_g1	c41019_g1
c47669_g2	c46492_g1	c49408_g2	c49171_g1
c47669_g2	c43460_g1	c38219_g1	c49171_g1
c44814_g1	c43857_g2	c38219_g1	c45560_g1
c47030_g3	c52905_g4	c42802_g2	c47425_g1
c49008_g3	c52905_g4	c52109_g1	c47425_g1
c47280_g1	c15156_g1	c51176_g1	c44055_g1
c47280_g1	c33476_g1	c52785_g1	c49015_g2
c44965_g1	c45800_g1	c52785_g1	c49015_g2
c48470_g1	c54632_g1	c45478_g1	c42515_g1
c48470_g1	c47659_g1	c46025_g1	c42515_g1
c48906_g1	c69511_g1	c46025_g1	c39765_g2
c52558_g1	c5910_g1	c35921_g1	c36961_g2
c52558_g1	c52165_g1	c46274_g6	c79767_g1
c52558_g1	c42321_g1	c41382_g2	c37879_g3
c41544_g1	c43056_g1	c50172_g2	c40645_g1
c50927_g1	c43056_g1	c40592_g1	c45541_g1
c52248_g1	c32933_g1	c52396_g2	c49046_g3
c50707_g1	c48472_g1	c40855_g1	c35063_g1
c41960_g3	c42261_g2	c35820_g1	c38360_g2
c39808_g1	c24545_g1	c46961_g1	c31855_g1
c39261_g1	c30161_g1	c45141_g1	c35641_g2
c39896_g1	c43893_g1	c50873_g3	c49465_g2
c28255_g1	c43893_g1	c50873_g3	c38984_g1
c49483_g1	c43893_g1	c47004_g2	c38984_g1
c49483_g1	c43893_g1	c51690_g7	c38984_g1
c44432_g1	c52482_g1	c38029_g1	c50701_g1
c44432_g1	c52482_g1	c42649_g1	c50701_g1
c52631_g1	c52102_g2	c39001_g1	c49519_g1
c52631_g1	c40491_g1	c40150_g2	c37071_g1
c48850_g1	c48607_g2	c45748_g1	c42503_g1
c51523_g1	c5773_g1	c52837_g1	c42503_g1
c47402_g1	c37079_g1	c47172_g1	c51599_g2
c48296_g2	c39838_g1	c38380_g1	c51599_g2
c39750_g1	c39838_g1	c50872_g2	c51599_g2
c35800_g2	c46279_g2	c52887_g2	c48755_g1
c42274_g1	c46279_g2	c52323_g2	c45397_g2
c25276_g1	c46279_g2	c51168_g2	c40362_g2
c71452_g1	c51198_g6	c51168_g2	c48071_g2
c42842_g1	c46444_g1	c51088_g1	c51203_g3
c42784_g2	c41984_g1	c50488_g2	c51203_g3
c40440_g1	c50963_g1	c41769_g3	c23724_g1
c41020_g1	c50963_g1	c45503_g1	c46490_g1
c22927_g1	c46637_g1	c37576_g1	c44291_g1
c51951_g1	c46637_g1	c16159_g1	c46149_g1
c43473_g1	c46637_g1	c51497_g7	c51776_g2
c46504_g1	c5379_g1	c29023_g2	c31466_g1
c29406_g1	c27486_g1	c52506_g1	c43270_g2
c47910_g3	c44332_g1	c43001_g1	c49576_g2
c48428_g3	c37551_g3	c39661_g1	c49576_g2
c45817_g3	c46798_g1	c42681_g3	c49576_g2
c22329_g1	c50422_g1	c43965_g1	c38049_g1
c31961_g1	c50422_g1	c50786_g1	c45055_g1
c40072_g1	c50422_g1	c50873_g2	c45055_g1
c35738_g1	c48405_g1	c52939_g2	c47904_g4
c45811_g1	c48405_g1	c43228_g1	c48594_g2
c40626_g1	c44110_g2	c43228_g1	c42806_g1
c40749_g1	c49448_g1	c26060_g1	c49076_g1
c46999_g1	c42822_g1	c37685_g1	c42905_g1
c22355_g1	c42160_g1	c51495_g2	c51354_g1
c49906_g4	c38906_g2	c31523_g1	c51354_g1
c32471_g1	c47870_g2	c49586_g1	c51354_g1
c47189_g2	c52095_g3	c49586_g1	c48617_g3
c45257_g2	c40174_g1	c46000_g2	c45365_g1
c27866_g1	c36542_g1	c41517_g1	c45365_g1
c36353_g1	c37720_g1	c50171_g2	c52866_g1
c45274_g1	c36243_g1	c50171_g2	c47223_g4
c61160_g1	c37008_g1	c35027_g1	c47062_g1
c45018_g2	c37008_g1	c33742_g1	c48510_g1
c41702_g1	c46833_g1	c35727_g1	c37883_g1
c41702_g1	c46833_g1	c44945_g1	c40234_g1
c41702_g1	c43165_g2	c49362_g1	c49293_g1
c41542_g1	c73485_g1	c49362_g1	c43840_g2
c41527_g4	c35621_g1	c45923_g3	c43103_g1
c51015_g3	c78711_g1	c50924_g1	c49907_g1
c47113_g2	c46160_g1	c48232_g1	c46164_g1
c42828_g2	c49811_g1	c42292_g1	c49167_g1
c39889_g1	c47303_g1	c49827_g1	c43365_g1
c48747_g1	c47303_g1	c47008_g2	c47722_g2
c48747_g1	c48737_g1	c49466_g1	c52026_g3
c44170_g1	c48737_g1	c45989_g1	c48111_g2
c44170_g1	c33847_g1	c37108_g3	c48111_g2
c45543_g2	c49401_g5	c44972_g1	c40543_g3
c45543_g2	c43279_g1	c51771_g1	c38348_g1
c51462_g1	c43279_g1	c31638_g1	c45352_g1
c35389_g1	c48817_g1	c37781_g1	c45480_g1
c35929_g1	c48817_g1	c49262_g3	c45480_g1
c47019_g3	c42193_g1	c49262_g3	c25647_g1
c48924_g2	c31529_g1	c506_g1	c34377_g1
c42444_g1	c41876_g2	c35476_g1	c49732_g2
c42444_g1	c23687_g1	c52662_g1	c52665_g1
c34240_g1	c43819_g1	c43020_g2	c52665_g1
c34240_g1	c27045_g2	c43020_g2	c45584_g1
c45991_g2	c41685_g1	c52350_g5	c36988_g1
c47034_g1	c52227_g1	c40517_g1	c52685_g1
c44830_g1	c52227_g1	c41197_g1	c46583_g1
c52472_g3	c47960_g1	c37041_g1	c44340_g1
c38104_g1	c54145_g1	c51883_g2	c38306_g1
c51943_g2	c51049_g1	c51593_g1	c42674_g2
c51943_g2	c51049_g1	c38283_g1	c38153_g1
c35373_g1	c51049_g1	c51298_g1	c42469_g2
c35373_g1	c36440_g2	c39654_g1	c50423_g4
c49361_g2	c42045_g1	c34497_g1	c25259_g2
c49361_g2	c31419_g1	c44909_g1	c45601_g1
c28537_g2	c43359_g1	c37684_g1	c37490_g1
c34422_g2	c49777_g1	c47616_g3	c51776_g1
c46548_g1	c49777_g1	c44576_g1	c38153_g2
c52847_g1	c49945_g1	c46209_g1	c35748_g1
c48007_g1	c37148_g1	c50363_g1	c38608_g2
c48007_g1	c37627_g1	c50363_g1	c46115_g1
c45161_g2	c50689_g1	c37914_g1	c46115_g1
c46788_g1	c50689_g1	c49374_g1	c51893_g1
c44581_g2	c19633_g1	c40278_g1	c51893_g1
c51048_g2	c52737_g1	c50733_g1	c52453_g1
c51048_g2	c52737_g1	c45488_g2	c52453_g1
c36317_g1	c52737_g1	c38097_g1	c52453_g1
c36317_g1	c3200_g1	c49749_g2	c52467_g1
c42845_g1	c47530_g1	c49749_g2	c36626_g1
c45063_g1	c50262_g1	c36212_g1	c40154_g1
c44857_g1	c50936_g1	c45877_g2	c42829_g1
c44857_g1	c45220_g1	c45511_g3	c42829_g1
c40946_g1	c33476_g2	c46902_g2	c52652_g2
c36363_g1	c38312_g2	c46619_g1	c52652_g2
c36014_g1	c45510_g2	c47836_g1	c46753_g1
c45985_g2	c43784_g2	c47836_g1	c50146_g1
c32636_g3	c48671_g4	c50615_g1	c45444_g1
c43229_g1	c461_g1	c51011_g1	c52529_g2
c49097_g1	c43784_g1	c42709_g1	c49405_g3
c51497_g3	c42504_g2	c39716_g2	c52521_g2
c51770_g1	c37470_g2	c50094_g1	c52521_g2
c40856_g1	c40929_g2	c47855_g2	c41382_g1
c50366_g4	c23480_g1	c31671_g1	c42203_g1
c52230_g3	c34634_g1	c45283_g1	c49281_g1
c50189_g1	c39874_g1	c44586_g1	c40443_g2
c50119_g2	c40277_g2	c44586_g1	c48027_g1
c48343_g1	c52860_g1	c40029_g1	c41877_g1
c34610_g2	c37172_g1	c43959_g1	c31708_g1
c26809_g1	c33468_g1	c40286_g1	c45675_g1
c49834_g1	c46124_g1	c40292_g1	c40606_g1
c57786_g1	c48715_g2	c41017_g1	c40606_g1
c40019_g1	c44764_g2	c46500_g1	c36961_g1
c51848_g2	c40448_g1	c46540_g3	c46835_g1
c44596_g1	c20519_g1	c49909_g1	c50796_g3
c46461_g2	c17926_g1	c49909_g1	c36639_g1
c47458_g1	c39452_g1	c34364_g1	c42308_g1
c52330_g2	c36839_g1	c51002_g1	c36558_g1
c44038_g1	c31099_g1	c52043_g2	c49340_g1
c52470_g1	c31099_g1	c50206_g2	c50513_g1
c48233_g2	c31099_g1	c48665_g1	c50513_g1
c35173_g1	c40999_g1	c45877_g1	c50513_g1
c34841_g1	c38659_g1	c50801_g2	c47893_g1
c35612_g1	c495_g1	c44594_g1	c50599_g1
c45620_g2	c39956_g2	c34574_g3	c50599_g1
c41852_g1	c6469_g2	c49023_g1	c49732_g3
c25048_g1	c15439_g1	c46005_g1	c51586_g2
c35176_g1	c42469_g1	c47219_g3	c51586_g2
c28499_g1	c45337_g2	c44224_g1	c45361_g2
c48288_g1	c45337_g2	c50345_g2	c50831_g4
c29026_g1	c49573_g1	c46498_g1	c39570_g1
c39547_g2	c49573_g1	c52493_g1	c38122_g1
c16901_g1	c29023_g1	c52493_g1	c34257_g1
c40612_g1	c32760_g3	c52049_g1	c44391_g2
c49605_g2	c52532_g1	c43249_g2	c32534_g1
c36592_g1	c8412_g1	c34098_g1	c40740_g2
c39616_g2	c50527_g1	c45277_g1	c44870_g2
c50663_g1	c50527_g1	c49305_g2	c44870_g2
c43737_g1	c51127_g2	c50311_g3	c42277_g1
c45927_g1	c45204_g4	c46576_g2	c46526_g1
c50273_g4	c39605_g2	c31713_g1	c46526_g1
c46808_g4	c33083_g1	c50680_g2	c38048_g1
c48288_g3	c37222_g1	c48879_g1	c38048_g1
c43940_g1	c35072_g1	c50414_g1	c46737_g1
c47123_g1	c50081_g1	c50414_g1	c46737_g1
c52782_g3	c36815_g1	c51213_g3	c49280_g1
c49522_g3	c34999_g1	c50442_g2	c49280_g1
c40377_g1	c46048_g1	c46000_g3	c49280_g1
c45003_g1	c45418_g1	c38678_g2	c49280_g1
c27472_g1	c45418_g1	c39690_g1	c36546_g1
c39644_g1	c71787_g1	c42742_g2	c50542_g2
c1403_g1	c44215_g1	c50386_g1	c50542_g2
c46671_g4	c33714_g2	c50386_g1	c50542_g2
c41168_g1	c67199_g1	c49176_g1	c41917_g1
c50222_g2	c48845_g1	c42780_g2	c44957_g1
c48167_g2	c52957_g1	c50067_g4	c51645_g4
c41150_g1	c52957_g1	c49409_g1	c39765_g1
c33635_g1	c52648_g3	c38803_g1	c51711_g2
c49987_g3	c48550_g3	c20316_g1	c51711_g2
c33869_g1	c34849_g1	c52552_g2	c46588_g1
c46638_g1	c45505_g1	c40308_g1	c46588_g1
c48572_g2	c45505_g1	c43458_g1	c46588_g1
c47765_g2	c48178_g1	c43742_g1	c48441_g2
c42228_g1	c42824_g3	c43742_g1	c48441_g2
c45940_g1	c46442_g1	c47067_g1	c51164_g2
c44267_g4	c46442_g1	c47067_g1	c48692_g1
c17399_g1	c46442_g1	c47517_g1	c48692_g1
c34559_g1	c46442_g1	c42041_g2	c37851_g1
c47506_g1	c38425_g1	c51787_g2	c36436_g1
c81582_g1	c38425_g1	c45217_g1	c34022_g1
c50830_g1	c38425_g1	c46620_g1	c74396_g1
c35911_g1	c42930_g2	c52420_g1	c44807_g1
c37315_g1	c42930_g2	c52710_g1	c47914_g1
c37315_g1	c43042_g1	c34168_g2	c47914_g1
c51166_g2	c48006_g3	c41125_g1	c45241_g1
c34044_g1	c48006_g3	c49584_g1	c45241_g1
c38072_g1	c35699_g1	c43600_g1	c45241_g1
c35547_g1	c44174_g1	c52316_g1	c39118_g1
c44455_g1	c44174_g1	c45598_g1	c49411_g1
c38796_g1	c39885_g1	c43887_g1	c49411_g1
c65225_g1	c36392_g1	c36517_g2	c37783_g1
c32517_g1	c38721_g1	c43820_g2	c49823_g1
c51476_g2	c42427_g1	c51383_g2	c40039_g1
c26904_g1	c45389_g2	c44697_g1	c44010_g2
c31757_g1	c50977_g2	c48520_g1	c36373_g1
c34879_g1	c26189_g1	c48520_g1	c48185_g3
c45744_g1	c42011_g1	c34479_g1	c48982_g2
c37325_g1	c39936_g1	c40823_g2	c35405_g1
c44494_g1	c29255_g1	c42080_g1	c23096_g1
c60364_g1	c42427_g2	c41218_g1	c23096_g1
c46709_g5	c52647_g1	c48191_g1	c48211_g3
c40431_g1	c52647_g1	c48191_g1	c37879_g1
c23890_g1	c40130_g1	c52673_g1	c42294_g2
c40125_g2	c39791_g1	c52673_g1	c46829_g2
c36783_g1	c36964_g1	c34597_g2	c46829_g2
c33045_g1	c42504_g1	c44597_g1	c48579_g1
c59840_g1	c49783_g3	c48637_g1	c48579_g1
c32643_g1	c42177_g1	c48637_g1	c36947_g2
c6935_g1	c44268_g1	c48198_g1	c52543_g3
c79266_g1	c74495_g1	c44769_g1	c22377_g1
c37297_g1	c39240_g2	c44769_g1	c54009_g1
c45181_g3	c39240_g2	c44549_g4	c44029_g1
c43639_g1	c47344_g1	c49289_g1	c43948_g2
c39206_g1	c47344_g1	c49289_g1	c43948_g2
c36833_g2	c52999_g1	c42807_g1	c43948_g2
c39403_g1	c52999_g1	c44688_g1	c49355_g7
c40006_g1	c31371_g1	c49345_g2	c49355_g7
c52807_g2	c44825_g1	c49584_g3	c44955_g3
c37215_g3	c48734_g1	c49158_g1	c43699_g1
c33809_g1	c48734_g1	c52014_g2	c34533_g1
c49048_g1	c48734_g1	c51375_g5	c51802_g1
c46498_g3	c48956_g4	c43018_g1	c51802_g1
c49906_g1	c46662_g1	c43018_g1	c51802_g1
c40472_g1	c46662_g1	c46380_g2	c41951_g1
c47382_g1	c46662_g1	c40575_g1	c46266_g1
c46991_g1	c35763_g1	c36410_g1	c46266_g1
c23493_g1	c48448_g1	c51690_g6	c52006_g1
c39607_g1	c50720_g1	c41507_g2	c52006_g1
c48695_g2	c39245_g1	c42777_g1	c52006_g1
c37331_g1	c47675_g1	c47057_g1	c48111_g3
c40079_g1	c47675_g1	c46773_g3	c46107_g1
c50906_g1	c43986_g1	c15450_g1	c47850_g1
c52768_g1	c43986_g1	c38302_g2	c47850_g1
c50835_g4	c44410_g1	c38302_g2	c50505_g1
c42655_g1	c45433_g3	c37398_g1	c50505_g1
c35956_g1	c52079_g3	c51126_g1	c50505_g1
c42749_g1	c47320_g2	c40141_g1	c50505_g1
c80473_g1	c47320_g2	c35818_g1	c50854_g1
c43886_g3	c47320_g2	c43493_g1	c34946_g1
c36831_g1	c47320_g2	c45243_g1	c34946_g1
c52942_g1	c47745_g1	c27810_g1	c52771_g1
c48707_g2	c44183_g3	c49295_g1	c52771_g1
c35384_g1	c49060_g2	c44184_g1	c52771_g1
c505_g1	c23416_g1	c35453_g1	c52771_g1
c48093_g1	c29650_g2	c39375_g2	c52771_g1
c34646_g1	c51544_g3	c48444_g2	c32786_g1
c44600_g1	c51685_g2	c37882_g1	c47326_g2
c54890_g1	c48049_g2	c39429_g2	c47808_g2
c23511_g1	c48049_g2	c45654_g3	c47808_g2
c40374_g1	c48049_g2	c50660_g5	c42552_g1
c38426_g1	c45494_g3	c47657_g4	c51021_g1
c51796_g3	c33257_g1	c43338_g1	c51021_g1
c43047_g3	c795_g1	c46880_g1	c46406_g1
c47157_g2	c23187_g1	c46880_g1	c46406_g1
c44493_g10	c48408_g4	c43274_g1	c39600_g1
c35304_g1	c39255_g1	c43274_g1	c39600_g1
c35089_g1	c34000_g1	c51246_g1	c44805_g1
c63713_g1	c46700_g1	c33219_g1	c51567_g1
c48671_g1	c42574_g2	c42554_g1	c51567_g1
c47756_g2	c42574_g2	c42554_g1	c51567_g1
c52381_g4	c44332_g2	c46707_g1	c51008_g2
c45450_g3	c38051_g2	c45873_g3	c40640_g1
c38359_g1	c34354_g1	c37710_g2	c40640_g1
c47273_g1	c47149_g1	c36162_g1	c52702_g1
c36053_g1	c47149_g1	c50944_g1	c52702_g1
c40495_g1	c39162_g1	c45351_g7	c46132_g2
c31979_g1	c41451_g1	c41142_g1	c48429_g1
c51062_g5	c9772_g1	c31203_g1	c48429_g1
c41770_g1	c9772_g1	c49315_g2	c35015_g1
c45211_g3	c50593_g5	c37361_g2	c41598_g1
c66627_g1	c50593_g5	c43642_g1	c49477_g7
c45758_g1	c26747_g1	c52392_g2	c48636_g1
c62111_g1	c36543_g1	c38128_g1	c39061_g1
c28239_g1	c52304_g1	c28610_g1	c47411_g1
c30654_g3	c35599_g1	c34028_g1	c51687_g1
c48511_g2	c35599_g1	c47384_g1	c48067_g2
c48146_g1	c35599_g1	c46540_g2	c48067_g2
c47345_g2	c51481_g1	c37159_g1	c39219_g1
c46116_g2	c38093_g4	c49440_g1	c39453_g1
c51289_g3	c37229_g1	c64005_g1	c48082_g1
c33956_g1	c40377_g2	c45773_g1	c48082_g1
c55206_g1	c40377_g2	c52761_g3	c48082_g1
c19233_g1	c49946_g2	c31944_g1	c51044_g1
c28367_g1	c49946_g2	c50880_g5	c51044_g1
c30341_g1	c45613_g1	c43239_g1	c51044_g1
c41288_g1	c40307_g1	c45932_g1	c48072_g2
c52910_g1	c45667_g1	c45040_g1	c40366_g1
c39505_g1	c43135_g1	c48227_g1	c41652_g1
c25054_g1	c40452_g1	c41921_g1	c26660_g1
c30646_g1	c40452_g1	c48714_g1	c47104_g1
c39807_g1	c45267_g1	c38038_g1	c43773_g1
c29046_g2	c49816_g3	c48593_g2	c47400_g1
c35314_g1	c49816_g3	c44138_g2	c47400_g1
c28664_g1	c32041_g1	c52289_g2	c48354_g1
c36862_g1	c32041_g1	c51658_g3	c45289_g1
c45618_g1	c44814_g1	c51866_g1	c45289_g1
c1780_g1	c46871_g1	c45069_g1	c44863_g1
c50315_g2	c51848_g1	c52601_g1	c51278_g1
c49593_g1	c51848_g1	c52601_g1	c51826_g2
c44499_g1	c51848_g1	c50829_g1	c50229_g1
c40874_g1	c47280_g1	c39365_g1	c46153_g2
c27775_g1	c47280_g1	c33368_g1	c52068_g4
c46750_g4	c47946_g2	c42976_g2	c45565_g2
c13289_g1	c48124_g1	c44792_g1	c37324_g1
c36090_g1	c48124_g1	c44792_g1	c50919_g1
c37422_g1	c45073_g1	c45674_g4	c42206_g1
c47201_g3	c45073_g1	c43243_g1	c44444_g1
c27618_g1	c48470_g1	c44935_g1	c50292_g1
c35320_g2	c48470_g1	c41148_g1	c44265_g1
c52715_g1	c45137_g1	c41148_g1	c45620_g4
c44499_g3	c33906_g1	c48580_g1	c41263_g1
c29754_g1	c43225_g1	c52679_g3	c49594_g2
c26077_g1	c43225_g1	c44986_g1	c46573_g3
c50285_g1	c41690_g1	c52953_g2	c45906_g1
c47273_g2	c48906_g1	c41054_g1	c22645_g1
c23758_g1	c52166_g2	c35991_g1	c27837_g1
c50205_g3	c43759_g1	c35991_g1	c27837_g1
c25542_g1	c43759_g1	c48136_g1	c42940_g1
c36473_g1	c63601_g1	c44213_g1	c42940_g1
c50835_g3	c50927_g1	c48793_g2	c49025_g2
c42297_g1	c32201_g1	c37464_g1	c43525_g1
c75395_g1	c46047_g1	c47712_g1	c39598_g1
c49426_g1	c46047_g1	c50757_g2	c42009_g1
c44798_g1	c44476_g1	c31637_g2	c51306_g1
c40755_g1	c44476_g1	c52366_g4	c43525_g3
c52523_g1	c44476_g1	c52146_g2	c48426_g3
c34753_g1	c51876_g2	c42268_g1	c42214_g2
c50961_g1	c51876_g2	c37368_g1	c42824_g2
c47350_g3	c51876_g2	c37368_g1	c50452_g2
c63590_g1	c51689_g5	c47575_g3	c45647_g1
c46767_g3	c49108_g1	c33826_g1	c45647_g1
c37557_g1	c39261_g1	c40752_g2	c49958_g1
c35735_g3	c39896_g1	c49755_g1	c36083_g1
c47654_g1	c49706_g1	c46985_g2	c45158_g1
c46272_g3	c49706_g1	c49145_g1	c65005_g1
c22412_g1	c49033_g1	c42976_g1	c43175_g1
c49792_g1	c49033_g1	c42912_g2	c48100_g1
c27279_g1	c49033_g1	c38057_g1	c41480_g1
c39878_g1	c49033_g1	c43065_g2	c53006_g1
c49716_g2	c49483_g1	c42671_g1	c48791_g1
c35338_g2	c49483_g1	c41964_g1	c64332_g1
c7762_g1	c49038_g2	c45408_g1	c10695_g1
	c45391_g1	c43490_g1	c42938_g1
	c36646_g1	c43490_g1	c42848_g1
	c48850_g1	c43243_g2	c47973_g2
	c47402_g1	c35661_g1	c44791_g1
	c36956_g1	c40804_g2	c43166_g1
	c71452_g1	c45769_g3	c46677_g1
	c43317_g1	c49486_g1	c32058_g1
	c42842_g1	c35907_g2	c49910_g2
	c49699_g1	c37071_g3	c46455_g2
	c49699_g1	c48012_g2	c43681_g1
	c40403_g1	c32655_g1	c43315_g1
	c46142_g2	c48180_g1	c43622_g3
	c50802_g1	c36586_g2	c49177_g2
	c41020_g1	c46190_g1	c40989_g1
	c40049_g1	c41148_g2	c40327_g1
	c44080_g1	c43098_g2	c40327_g1
	c47859_g1	c36925_g1	c34048_g1
	c52580_g1	c43673_g1	c43621_g1
	c45205_g2	c41956_g1	c51822_g3
	c57951_g1	c41714_g2	c42922_g1
	c52864_g2	c44231_g1	c42467_g1
	c34616_g1	c52656_g1	c45610_g1
	c52807_g1	c52656_g1	c38557_g1
	c52807_g1	c42536_g1	c48733_g1
	c27178_g1	c42536_g1	c39347_g1
	c36833_g1	c45186_g2	c1040_g1
	c41004_g1	c45324_g1	c50627_g3
	c31233_g1	c42849_g1	c40520_g2
	c43473_g1	c37662_g2	c40546_g1
	c1041_g1	c49491_g4	c40546_g1
	c46504_g1	c45406_g1	c35328_g3
	c29406_g1	c49246_g2	c50267_g2
	c49031_g1	c49246_g2	c43629_g2
	c41983_g2	c41443_g1	c50193_g2
	c47908_g1	c37740_g1	c50193_g2
	c48428_g3	c11531_g1	c50193_g2
	c45817_g3	c46584_g1	c32756_g1
	c17337_g1	c52526_g1	c32756_g1
	c50826_g1	c36953_g1	c46715_g1
	c50826_g1	c49722_g1	c46715_g1
	c48428_g1	c55446_g1	c43772_g2
	c51496_g1	c36100_g1	c43772_g2
	c1236_g1	c45022_g1	c48561_g1
	c46590_g3	c39588_g1	c51651_g1
	c52314_g1	c39588_g1	c51651_g1
	c35738_g1	c45511_g2	c49885_g3
	c39102_g2	c43316_g1	c69452_g1
	c51520_g2	c38132_g1	c43150_g1
	c38489_g1	c38132_g1	c41547_g1
	c46167_g1	c44546_g1	c38002_g2
	c52818_g2	c45805_g2	c46749_g1
	c45799_g1	c51872_g2	c46948_g1
	c22355_g1	c49160_g1	c51806_g2
	c49906_g4	c48917_g1	c52893_g4
	c40382_g3	c46675_g1	c36056_g1
	c40382_g3	c50494_g1	c51311_g1
	c47189_g2	c48319_g2	c38702_g2
	c47370_g2	c42251_g3	c46128_g1
	c45257_g2	c42883_g1	c37518_g1
	c47363_g1	c39621_g1	c31637_g1
	c27866_g1	c39621_g1	c38010_g1
	c43354_g1	c47270_g1	c38010_g1
	c43354_g1	c47270_g1	c39198_g1
	c36353_g1	c51399_g2	c44903_g1
	c30293_g1	c49748_g1	c41187_g1
	c45423_g2	c42183_g1	c40427_g1
	c34975_g1	c35479_g1	c50997_g4
	c34975_g1	c51931_g3	c50884_g1
	c37045_g1	c51931_g3	c51977_g4
	c51972_g6	c43521_g1	c51573_g1
	c43101_g1	c52117_g1	c37939_g3
	c43101_g1	c49315_g1	c50997_g3
	c45274_g1	c58440_g1	c52926_g1
	c61160_g1	c29016_g1	c41774_g2
	c45018_g2	c46424_g1	c51016_g4
	c41702_g1	c40990_g1	c37939_g1
	c41702_g1	c49537_g1	c53031_g1
	c41702_g1	c50796_g7	c35328_g4
	c50096_g1	c46082_g2	c41353_g1
	c32711_g1	c43595_g1	c52964_g1
	c41542_g1	c40817_g1	c49598_g1
	c37869_g1	c52394_g2	c49598_g1
	c37869_g1	c46571_g2	c51652_g2
	c33949_g1	c46571_g2	c41837_g1
	c33949_g1	c74490_g1	c46301_g1
	c51568_g1	c51825_g1	c47085_g4
	c51568_g1	c48236_g1	c47085_g4
	c51015_g3	c43985_g1	c8873_g1
	c47113_g2	c43366_g2	c43446_g2
	c42828_g2	c49441_g1	c51510_g2
	c39889_g1	c39872_g1	c43445_g1
	c45423_g1	c40562_g1	c37939_g4
	c50122_g2	c49829_g1	c43621_g2
	c49260_g2	c47814_g2	c39409_g1
	c45543_g2	c46001_g1	c25410_g1
	c45543_g2	c45595_g2	c40376_g1
	c51462_g1	c50057_g1	c32325_g1
	c42598_g2	c50012_g1	c38812_g1
	c42598_g2	c48513_g1	c35734_g1
	c35389_g1	c48513_g1	c49098_g3
	c40049_g2	c52718_g1	c49021_g2
	c40049_g2	c52718_g1	c52693_g2
	c49038_g3	c37816_g1	c49032_g1
	c48029_g1	c43761_g2	c8271_g1
	c43543_g2	c43761_g2	c48259_g1
	c46521_g1	c50210_g1	c27905_g1
	c46521_g1	c50210_g1	c37550_g1
	c44751_g1	c36717_g1	c36545_g2
	c48924_g2	c46429_g1	c33660_g1
	c48154_g3	c34831_g2	c49405_g2
	c33699_g1	c36222_g1	c35328_g2
	c45991_g2	c43059_g2	c43065_g1
	c46347_g1	c46263_g2	c35863_g1
	c46347_g1	c44779_g1	c35328_g1
	c52132_g1	c46851_g1	c47454_g1
	c52132_g1	c40408_g1	c39576_g1
	c52132_g1	c47147_g2	c49592_g3
	c33322_g1	c42503_g2	c46231_g3
	c52472_g3	c44263_g2	c32073_g1
	c51943_g2	c44263_g2	c42750_g1
	c51943_g2	c28590_g1	c41286_g2
	c46842_g1	c41507_g1	c44925_g1
	c45429_g1	c39500_g1	c19848_g1
	c37284_g2	c52904_g1	c42173_g1
	c48461_g1	c49751_g1	c37591_g2
	c40219_g1	c50603_g3	c33971_g1
	c40219_g1	c45477_g1	c40520_g1
	c47313_g3	c50216_g3	c52088_g1
	c35373_g1	c52080_g2	c37203_g1
	c35373_g1	c49707_g2	c76999_g1
	c49361_g2	c51942_g1	c37063_g1
	c49361_g2	c4518_g1	c31066_g1
	c39349_g1	c51142_g2	c47176_g3
	c34422_g2	c40825_g1	c33754_g1
	c48007_g1	c40825_g1	c71841_g1
	c48007_g1	c52707_g4	c34031_g2
	c49518_g3	c48594_g1	c52899_g1
	c42106_g2	c38799_g2	c50869_g1
	c45161_g2	c42559_g2	c37812_g1
	c46948_g3	c41939_g1	c44457_g2
	c41234_g1	c17122_g1	c39303_g1
	c45495_g1	c37343_g1	c40800_g1
	c46524_g2	c41832_g2	c60057_g1
	c46524_g2	c51591_g1	c36332_g2
	c46788_g1	c51591_g1	c36661_g1
	c47372_g1	c50308_g1	c52417_g1
	c47372_g1	c50308_g1	c52417_g1
	c41785_g1	c48453_g2	c23686_g1
	c44581_g2	c37544_g1	c36555_g1
	c40129_g1	c44635_g1	c40274_g1
	c40129_g1	c47904_g1	c28844_g1
	c46102_g1	c47650_g3	c37939_g2
	c39778_g1	c47513_g2	c45850_g1
	c51048_g2	c47513_g2	c44694_g1
	c51048_g2	c52425_g2	c35343_g1
	c37386_g1	c44298_g3	c36978_g1
	c30128_g1	c43033_g1	c40486_g2
	c36317_g1	c40873_g1	c41774_g1
	c36317_g1	c51118_g2	c48971_g1
	c41064_g1	c46507_g2	c34040_g1
	c37745_g1	c51991_g1	c44669_g2
	c42845_g1	c36509_g1	c45211_g7
	c45341_g1	c48316_g2	c38170_g1
	c45341_g1	c48316_g2	c48733_g4
	c44857_g1	c51595_g1	c48202_g1
	c44857_g1	c49732_g1	c46943_g1
	c46808_g2	c52596_g1	c25828_g1
	c40946_g1	c50753_g1	c44545_g1
	c43091_g1	c47650_g1	c43408_g4
	c43091_g1	c52623_g1	c36033_g1
	c52975_g1	c52623_g1	c49675_g1
	c39291_g1	c52623_g1	c41537_g1
	c36014_g1	c47246_g1	c40078_g1
	c37383_g1	c42700_g1	c46546_g6
	c83084_g1	c42875_g2	c47457_g2
	c40856_g1	c45507_g1	c43156_g4
	c50366_g4	c47095_g3	c52173_g1
	c8962_g1	c52809_g1	c36754_g1
	c32787_g1	c52809_g1	c10150_g1
	c43826_g1	c52809_g1	c49477_g6
	c50119_g2	c44344_g2	c13907_g1
	c34610_g2	c51179_g2	c50873_g4
	c37603_g1	c49844_g3	c37444_g1
	c49834_g1	c37030_g1	c57464_g1
	c45101_g2	c43838_g1	c64798_g1
	c32760_g2	c39540_g2	c37055_g1
	c42469_g5	c50533_g2	c45620_g3
	c51848_g2	c29078_g2	c33754_g2
	c44596_g1	c48035_g1	c67254_g1
	c38877_g1	c48035_g1	c41914_g1
	c28780_g2	c40326_g1	c38691_g2
	c39957_g1	c48605_g1	c27184_g1
	c46896_g1	c41405_g2	c38549_g1
	c32398_g1	c47245_g1	c52685_g4
	c44449_g3	c50458_g2	c52642_g1
	c44691_g1	c50458_g2	c41893_g1
	c20825_g1	c46369_g1	c25259_g1
	c45370_g3	c16122_g1	c23981_g1
	c37186_g1	c52489_g1	c36226_g1
	c32327_g1	c45069_g2	c49517_g3
	c25048_g1	c51628_g1	c32538_g1
	c37603_g2	c38463_g1	c77687_g1
	c48392_g3	c52652_g1	c27951_g1
	c45847_g4	c38152_g1	c46714_g2
	c35176_g1	c40625_g1	c65028_g1
	c50105_g1	c48001_g1	c33507_g1
	c48288_g1	c35719_g1	c32796_g1
	c39547_g2	c47435_g1	c46762_g4
	c45316_g3	c36654_g1	c40522_g1
	c52547_g3	c51545_g1	c47307_g4
	c30983_g1	c51172_g1	c48971_g2
	c16901_g1	c38583_g1	c43370_g3
	c49605_g2	c44381_g1	c38598_g1
	c46111_g1	c45570_g1	c48111_g1
	c36592_g1	c48833_g1	c30653_g1
	c39616_g2	c53358_g1	c52016_g12
	c39163_g1	c51670_g1	c40056_g1
	c47127_g2	c41667_g1	c31563_g1
	c43737_g1	c49014_g1	c37175_g1
	c46808_g4	c49691_g1	c37915_g1
	c48288_g3	c49691_g1	c42640_g1
	c52782_g3	c51755_g3	c44120_g1
	c49522_g3	c44870_g1	c4435_g1
	c40377_g1	c50236_g1	c47095_g1
	c26916_g1	c49838_g1	c22979_g1
	c45003_g1	c49838_g1
	c39644_g1	c49650_g1
	c1403_g1	c38432_g1
	c46671_g4	c31016_g1
	c41168_g1	c34597_g1
	c50222_g2	c49934_g1
	c48167_g2	c52177_g1
	c33635_g1	c52177_g1
	c39578_g1	c52177_g1
	c46638_g1	c31828_g1
	c48572_g2	c36084_g1
	c42228_g1	c50967_g3
	c45940_g1	c49734_g4
	c44267_g4	c49734_g4
	c17399_g1	c45873_g4
	c69902_g1	c35905_g1
	c34559_g1	c52269_g2
	c28780_g1	c44889_g1
	c34549_g1	c43538_g1
	c40899_g1	c41487_g2
	c14175_g1	c45148_g1
	c51157_g1	c45208_g1
	c40150_g4	c45208_g1
	c51820_g3	c35778_g1
	c51820_g3	c47680_g3
	c40193_g1	c41001_g1
	c42404_g1	c46191_g1
	c43080_g1	c74220_g1
	c43080_g1	c47062_g2
	c26092_g1	c70358_g1
	c39547_g3	c48878_g2
	c40756_g2	c48878_g2
	c32517_g1	c44051_g1
	c23996_g1	c47648_g1
	c26904_g1	c43093_g1
	c59943_g1	c44520_g1
	c47191_g4	c37784_g1
	c44494_g1	c47032_g1
	c38205_g1	c38279_g1
	c34703_g1	c40479_g1
	c38764_g1	c40479_g1
	c33045_g1	c43968_g1
	c66126_g1	c44699_g2
	c15266_g1	c47599_g1
	c43543_g1	c44527_g1
	c48574_g2	c51944_g2
	c79266_g1	c51944_g2
	c36833_g2	c42473_g2
	c52807_g2	c52963_g2
	c32125_g1	c52963_g2
	c46300_g1	c43561_g1
	c44813_g1	c48658_g2
	c45954_g1	c52370_g4
	c33809_g1	c37804_g1
	c49048_g1	c37804_g1
	c52538_g1	c37804_g1
	c49906_g1	c41962_g1
	c44333_g4	c52197_g3
	c46797_g1	c47005_g1
	c38529_g1	c41562_g1
	c31023_g1	c49015_g3
	c48620_g1	c41804_g1
	c45073_g3	c6634_g1
	c36564_g1	c52790_g1
	c48695_g2	c39773_g3
	c37331_g1	c48866_g2
	c32369_g1	c39089_g1
	c34944_g1	c49221_g2
	c34422_g1	c36849_g3
	c35816_g1	c41143_g1
	c48680_g3	c45491_g1
	c42749_g1	c47671_g4
	c39957_g3	c46202_g1
	c36865_g1	c49546_g1
	c64172_g1	c45664_g1
	c32667_g1	c41757_g1
	c35384_g1	c48028_g1
	c44473_g2	c42323_g1
	c34646_g1	c52919_g2
	c30092_g1	c52919_g2
	c24229_g1	c33066_g2
	c79461_g1	c42223_g1
	c37897_g1	c46312_g3
	c54890_g1	c47053_g2
	c81044_g1	c42286_g1
	c30012_g1	c46463_g1
	c40374_g1	c46463_g1
	c38426_g1	c41993_g1
	c43272_g3	c45676_g2
	c32510_g1	c45676_g2
	c31354_g1	c33604_g1
	c33085_g1	c31856_g1
	c7782_g1	c35271_g2
	c58985_g1	c52319_g2
	c43383_g1	c52319_g2
	c32252_g1	c44328_g1
	c28464_g2	c44328_g1
	c63713_g1	c37540_g2
	c35199_g1	c44063_g1
	c35427_g1	c47160_g2
	c43281_g1	c47927_g1
	c36846_g1	c45560_g1
	c47756_g2	c45251_g1
	c26138_g2	c49347_g2
	c38359_g1	c49347_g2
	c47273_g1	c42996_g1
	c74797_g1	c44032_g1
	c36053_g1	c44055_g1
	c30350_g1	c35044_g1
	c39643_g1	c40465_g1
	c37884_g3	c49015_g2
	c25304_g1	c49015_g2
	c27801_g1	c46113_g1
	c33555_g1	c48633_g2
	c54480_g1	c48658_g1
	c28239_g1	c42515_g1
	c15916_g1	c42515_g1
	c48146_g1	c39765_g2
	c26137_g1	c44654_g1
	c46116_g2	c47817_g1
	c26138_g1	c36701_g2
	c36623_g1	c36701_g2
	c49769_g4	c31042_g1
	c48643_g3	c47878_g1
	c42624_g1	c42898_g1
	c36722_g2	c42898_g1
	c22819_g1	c49295_g2
	c38197_g2	c49295_g2
	c32559_g1	c42740_g1
	c25528_g1	c42740_g1
	c39505_g1	c41417_g1
	c33464_g1	c50391_g5
	c37884_g1	c46598_g1
	c37917_g1	c44519_g1
	c39807_g1	c44519_g1
	c35314_g1	c45541_g1
	c54114_g1	c46768_g1
	c17732_g1	c43829_g2
	c44494_g2	c49046_g3
	c35541_g2	c28425_g2
	c1780_g1	c31855_g1
	c51386_g2	c31037_g1
	c27775_g1	c50439_g3
	c33510_g1	c42467_g3
	c42068_g1	c41682_g1
	c30302_g1	c48946_g2
	c13289_g1	c48946_g2
	c47201_g3	c44289_g2
	c37535_g1	c42942_g1
	c41932_g1	c45871_g1
	c79843_g1	c41934_g2
	c73446_g1	c40352_g1
	c42854_g1	c44041_g1
	c47963_g3	c49258_g1
	c34693_g1	c49258_g1
	c37797_g1	c47203_g1
	c52509_g2	c53026_g1
	c64296_g1	c53026_g1
	c24629_g1	c53026_g1
	c15611_g1	c36998_g1
	c50205_g3	c37071_g1
	c68076_g1	c50391_g2
	c42297_g1	c42503_g1
	c49426_g1	c42503_g1
	c65627_g1	c34740_g1
	c40755_g1	c34740_g1
	c64333_g1	c35149_g1
	c33851_g1	c37071_g2
	c34753_g1	c47073_g1
	c50961_g1	c48064_g1
	c34301_g1	c45397_g2
	c32652_g1	c40362_g2
	c43920_g2	c46972_g2
	c39803_g1	c46972_g2
	c23033_g1	c47476_g1
	c41828_g1	c44643_g1
	c31600_g1	c50311_g2
	c23423_g1	c39267_g2
	c24334_g1	c45211_g2
	c59310_g1	c46490_g1
	c35735_g3	c48220_g2
	c38332_g1	c47281_g1
	c47654_g1	c51975_g1
	c39736_g1	c51975_g1
	c27279_g1	c46149_g1
	c8739_g1	c49053_g1
	c34865_g1	c34986_g1
	c36432_g1	c51776_g2
	c31935_g5	c47225_g1
		c31466_g1
		c43998_g1
		c43270_g2
		c46669_g3
		c40672_g1
		c51448_g1
		c44086_g1
		c39443_g1
		c47904_g4
		c44121_g1
		c48594_g2
		c36060_g1
		c42806_g1
		c47758_g1
		c40824_g1
		c46699_g1
		c42905_g1
		c31343_g1
		c41183_g1
		c43507_g1
		c46344_g2
		c66044_g1
		c41560_g1
		c31110_g1
		c52866_g1
		c44539_g1
		c23483_g1
		c23483_g1
		c49649_g1
		c49649_g1
		c49649_g1
		c44966_g1
		c47773_g1
		c38118_g1
		c38118_g1
		c38118_g1
		c44734_g2
		c43115_g1
		c44574_g1
		c42307_g2
		c39539_g1
		c44057_g1
		c47062_g1
		c41395_g1
		c43757_g1
		c42320_g2
		c51694_g1
		c44940_g1
		c50023_g1
		c46588_g2
		c41911_g2
		c40234_g1
		c52186_g1
		c52186_g1
		c41804_g2
		c49293_g1
		c43103_g1
		c50455_g4
		c8682_g1
		c48247_g1
		c42697_g1
		c38898_g1
		c41061_g3
		c41061_g3
		c40573_g2
		c19641_g1
		c52245_g1
		c44366_g1
		c22854_g1
		c40499_g2
		c40941_g1
		c37262_g1
		c48285_g2
		c48285_g2
		c49246_g3
		c34778_g1
		c25250_g1
		c47722_g2
		c39609_g1
		c41755_g3
		c52026_g3
		c50553_g1
		c50553_g1
		c50553_g1
		c48111_g2
		c48111_g2
		c45660_g1
		c31653_g1
		c58198_g1
		c32216_g2
		c44500_g1
		c42532_g1
		c42901_g1
		c38348_g1
		c21657_g1
		c38194_g1
		c11944_g1
		c39087_g2
		c49749_g3
		c61453_g1
		c31232_g1
		c51257_g3
		c36034_g1
		c42787_g1
		c33384_g1
		c39716_g1
		c47949_g1
		c47949_g1
		c42707_g1
		c32276_g1
		c47369_g1
		c47579_g1
		c47579_g1
		c44022_g2
		c34377_g1
		c43352_g2
		c49732_g2
		c39496_g1
		c49766_g2
		c29246_g1
		c43907_g1
		c52665_g1
		c52665_g1
		c46939_g1
		c50099_g1
		c49183_g4
		c50554_g2
		c50554_g2
		c45584_g1
		c41543_g1
		c1308_g1
		c26818_g2
		c44340_g1
		c49716_g1
		c42475_g1
		c40312_g1
		c51114_g1
		c42674_g2
		c43753_g1
		c41250_g3
		c40333_g2
		c31231_g1
		c44257_g1
		c50423_g4
		c49970_g3
		c37837_g1
		c46151_g4
		c51489_g1
		c37490_g1
		c31685_g1
		c44678_g1
		c52108_g2
		c44451_g2
		c38608_g2
		c30993_g1
		c50654_g1
		c43104_g2
		c42723_g1
		c47346_g1
		c52259_g2
		c52259_g2
		c47284_g1
		c35814_g1
		c52467_g1
		c50594_g1
		c50594_g1
		c36626_g1
		c40154_g1
		c51276_g1
		c51276_g1
		c49401_g4
		c39249_g1
		c33819_g2
		c36124_g1
		c50449_g3
		c52707_g2
		c41575_g1
		c50146_g1
		c32213_g2
		c41464_g1
		c57660_g1
		c35635_g2
		c48907_g4
		c42320_g1
		c45444_g1
		c37340_g1
		c52529_g2
		c36664_g1
		c41382_g1
		c42203_g1
		c35359_g1
		c41829_g1
		c39424_g1
		c23194_g1
		c40547_g1
		c33522_g1
		c40443_g2
		c48027_g1
		c33472_g1
		c51282_g1
		c49706_g2
		c49706_g2
		c44460_g2
		c75359_g1
		c50172_g1
		c52350_g1
		c31216_g1
		c45675_g1
		c59618_g1
		c31821_g1
		c44338_g1
		c51946_g2
		c51946_g2
		c51946_g2
		c52555_g1
		c45332_g2
		c36961_g1
		c32213_g1
		c46835_g1
		c51797_g4
		c40932_g1
		c30804_g1
		c36558_g1
		c49340_g1
		c41934_g1
		c32916_g1
		c49732_g3
		c30804_g2
		c44661_g2
		c31802_g1
		c36155_g1
		c45361_g2
		c42129_g1
		c42129_g1
		c39570_g1
		c48760_g1
		c48760_g1
		c48760_g1
		c41233_g1
		c41233_g1
		c40210_g1
		c40210_g1
		c35594_g1
		c46507_g1
		c38122_g1
		c42880_g1
		c42880_g1
		c46937_g1
		c50796_g4
		c38250_g1
		c52443_g2
		c52443_g2
		c52443_g2
		c34257_g1
		c46669_g1
		c38731_g1
		c38731_g1
		c44391_g2
		c52330_g3
		c52330_g3
		c32534_g1
		c47415_g1
		c47415_g1
		c47415_g1
		c43677_g1
		c50796_g6
		c44787_g1
		c44787_g1
		c42880_g2
		c42880_g2
		c46526_g1
		c46526_g1
		c38048_g1
		c38048_g1
		c46653_g2
		c46653_g2
		c46737_g1
		c46737_g1
		c47454_g2
		c17117_g1
		c49280_g1
		c49280_g1
		c49280_g1
		c49280_g1
		c60617_g1
		c46054_g2
		c52454_g2
		c52454_g2
		c36546_g1
		c44957_g1
		c44872_g2
		c44872_g2
		c51645_g4
		c48300_g1
		c48300_g1
		c48875_g1
		c39765_g1
		c51301_g3
		c40115_g1
		c44590_g2
		c44590_g2
		c41401_g1
		c41401_g1
		c38431_g1
		c40823_g1
		c42636_g1
		c13970_g1
		c48501_g1
		c52350_g2
		c28227_g1
		c51164_g2
		c5653_g1
		c41789_g1
		c5997_g1
		c38829_g1
		c49580_g1
		c51068_g2
		c20307_g1
		c48033_g4
		c48482_g2
		c46668_g2
		c32710_g1
		c44328_g2
		c44328_g2
		c52500_g1
		c52500_g1
		c40621_g1
		c40621_g1
		c40621_g1
		c49601_g4
		c34022_g1
		c74396_g1
		c29150_g1
		c52548_g2
		c52548_g2
		c52548_g2
		c19690_g1
		c44807_g1
		c47914_g1
		c47914_g1
		c44584_g4
		c44584_g4
		c38868_g1
		c48967_g1
		c37879_g2
		c31513_g1
		c41964_g2
		c39118_g1
		c52371_g1
		c52371_g1
		c52721_g1
		c42694_g1
		c29150_g2
		c52079_g4
		c29209_g1
		c51865_g3
		c37783_g1
		c49823_g1
		c37838_g1
		c38868_g2
		c46604_g1
		c46604_g1
		c46604_g1
		c46604_g1
		c51184_g1
		c51184_g1
		c37806_g2
		c36373_g1
		c35907_g1
		c44415_g1
		c31547_g1
		c39608_g1
		c30478_g1
		c48185_g3
		c44807_g2
		c34039_g1
		c48982_g2
		c41418_g1
		c41418_g1
		c41418_g1
		c47608_g1
		c48009_g3
		c48688_g2
		c47124_g1
		c32879_g1
		c49753_g3
		c41487_g3
		c52298_g1
		c52298_g1
		c36009_g1
		c42294_g2
		c40902_g1
		c40902_g1
		c40786_g1
		c50175_g2
		c36785_g1
		c44035_g2
		c33797_g1
		c42766_g1
		c42766_g1
		c46070_g1
		c46070_g1
		c44029_g1
		c43663_g1
		c49844_g2
		c36137_g1
		c50427_g1
		c50427_g1
		c43860_g1
		c45246_g1
		c45246_g1
		c44955_g3
		c43848_g2
		c43848_g2
		c38977_g1
		c38977_g1
		c38724_g1
		c42804_g1
		c42804_g1
		c34533_g1
		c38833_g1
		c50111_g2
		c18971_g1
		c44959_g2
		c44959_g2
		c31746_g1
		c41951_g1
		c41257_g1
		c52006_g1
		c52006_g1
		c52006_g1
		c48111_g3
		c46291_g1
		c46291_g1
		c45713_g2
		c45713_g2
		c42752_g1
		c42752_g1
		c46556_g2
		c42237_g2
		c42237_g2
		c47850_g1
		c47850_g1
		c33521_g1
		c49762_g1
		c45480_g4
		c34465_g1
		c51104_g2
		c51104_g2
		c50854_g1
		c52680_g1
		c52680_g1
		c49046_g5
		c40572_g2
		c33579_g1
		c43518_g1
		c35680_g1
		c55778_g1
		c52941_g1
		c52941_g1
		c52941_g1
		c49297_g1
		c49297_g1
		c49297_g1
		c44092_g1
		c34946_g1
		c34946_g1
		c47305_g2
		c47305_g2
		c47305_g2
		c47186_g1
		c47186_g1
		c44526_g1
		c44526_g1
		c52555_g2
		c52555_g2
		c51399_g3
		c44917_g1
		c50370_g1
		c50370_g1
		c47915_g1
		c47915_g1
		c47915_g1
		c43464_g1
		c43464_g1
		c43464_g1
		c43464_g1
		c51021_g1
		c51021_g1
		c40804_g1
		c47775_g1
		c47775_g1
		c38279_g3
		c47624_g1
		c31415_g1
		c52212_g2
		c52212_g2
		c47016_g1
		c51390_g1
		c51390_g1
		c51390_g1
		c41123_g4
		c41123_g4
		c35697_g2
		c44657_g1
		c50355_g1
		c31702_g1
		c51740_g1
		c40454_g1
		c37282_g1
		c51399_g4
		c51399_g4
		c51095_g1
		c51095_g1
		c51095_g1
		c41094_g1
		c41094_g1
		c51008_g2
		c46900_g4
		c46900_g4
		c46900_g4
		c40640_g1
		c40640_g1
		c52197_g1
		c52197_g1
		c52197_g1
		c52518_g4
		c49230_g1
		c49230_g1
		c52702_g1
		c52702_g1
		c50056_g3
		c50056_g3
		c43793_g1
		c43793_g1
		c48429_g1
		c48429_g1
		c43370_g1
		c42064_g1
		c47411_g1
		c41961_g2
		c51687_g1
		c30707_g1
		c45659_g1
		c45659_g1
		c39453_g1
		c34845_g1
		c44060_g3
		c21461_g1
		c52001_g3
		c33945_g1
		c51044_g1
		c51044_g1
		c51044_g1
		c50499_g1
		c50499_g1
		c50499_g1
		c48072_g2
		c37065_g1
		c37065_g1
		c45120_g1
		c68956_g1
		c26660_g1
		c49262_g5
		c44149_g1
		c48354_g1
		c36956_g2
		c39247_g2
		c52343_g2
		c44553_g1
		c50802_g3
		c50662_g3
		c49660_g1
		c45289_g1
		c45289_g1
		c50858_g1
		c35570_g1
		c47355_g3
		c49923_g2
		c50260_g2
		c50672_g2
		c52921_g1
		c31721_g1
		c51278_g1
		c33424_g1
		c51826_g2
		c37973_g1
		c37105_g1
		c47214_g3
		c52846_g2
		c37386_g2
		c50671_g1
		c34047_g1
		c45604_g1
		c51815_g6
		c22408_g1
		c47285_g1
		c50919_g1
		c42206_g1
		c52742_g1
		c44444_g1
		c50292_g1
		c46795_g1
		c37305_g1
		c7430_g1
		c47105_g2
		c34284_g1
		c77363_g1
		c41263_g1
		c50156_g3
		c44565_g1
		c39127_g1
		c49594_g2
		c46425_g2
		c46425_g2
		c48205_g2
		c52068_g2
		c23361_g1
		c43990_g1
		c43710_g1
		c44364_g2
		c43235_g2
		c25113_g1
		c40410_g1
		c48014_g1
		c44631_g1
		c43918_g1
		c45990_g1
		c44344_g1
		c45906_g1
		c38633_g1
		c42242_g1
		c42242_g1
		c43075_g1
		c52415_g1
		c32216_g1
		c47734_g1
		c32858_g1
		c49864_g1
		c44566_g1
		c42009_g1
		c49872_g1
		c51306_g1
		c52002_g3
		c46795_g3
		c40383_g1
		c40383_g1
		c48426_g3
		c48474_g2
		c34031_g1
		c42802_g5
		c48489_g1
		c50138_g1
		c20630_g1
		c44627_g1
		c50502_g3
		c51723_g1
		c30543_g1
		c40898_g2
		c42824_g2
		c42498_g3
		c34994_g1
		c50452_g2
		c33615_g1
		c51815_g4
		c49958_g1
		c36083_g1
		c42237_g3
		c6022_g2
		c43084_g1
		c43899_g2
		c421_g1
		c52617_g1
		c47362_g2
		c43525_g4
		c47331_g1
		c33610_g1
		c48813_g1
		c51150_g1
		c34605_g1
		c7524_g1
		c48100_g1
		c50823_g2
		c53006_g1
		c45256_g1
		c49183_g3
		c42690_g1
		c64332_g1
		c41010_g4
		c61590_g1
		c10695_g1
		c40201_g1
		c47363_g1
		c42284_g1
		c42284_g1
		c33130_g1
		c46713_g2
		c38325_g1
		c42760_g1
		c35058_g1
		c34817_g1
		c41728_g2
		c37039_g1
		c37039_g1
		c49686_g3
		c46129_g1
		c35934_g1
		c40010_g1
		c40172_g1
		c47934_g2
		c33894_g1
		c38531_g2
		c38546_g1
		c38546_g1
		c43921_g1
		c43921_g1
		c47250_g4
		c36931_g1
		c42316_g1
		c25808_g1
		c43101_g2
		c46785_g1
		c52551_g3
		c52551_g3
		c36925_g4
		c32819_g1
		c35033_g1
		c50603_g1
		c48998_g1
		c35112_g1
		c3163_g1
		c42784_g4
		c41423_g1
		c38521_g4
		c50122_g2
		c37482_g1
		c38013_g1
		c38013_g1
		c49009_g5
		c36283_g1
		c49587_g1
		c49587_g1
		c44716_g1
		c46239_g1
		c46239_g1
		c43177_g1
		c43769_g1
		c16090_g1
		c48034_g1
		c48034_g1
[truncated: 661 more rows]
