# Supplementary material for: Understanding the response in Pugionium cornutum (L.) Gaertn. seedling leaves under drought stress using transcriptome and proteome integrated analysis
Source: PeerJ. 2023 Apr 3;11:e15165. doi: 10.7717/peerj.15165 (PMC10078451; doi:10.7717/peerj.15165)
Supplement: Supplemental Information 10 [file peerj-11-15165-s010.xlsx]

## Sheet: L2-L1
GO_ID	Term	DGs number	DGs	Annotated genes	P value	FDR
GO:0048367	shoot system development	111	c17117_g1|c23991_g1|c29016_g1|c30707_g1|c31685_g1|c33424_g1|c34444_g1|c35697_g2|c36034_g1|c36359_g1|c36626_g1|c37340_g1|c37368_g1|c38431_g1|c38463_g1|c38799_g2|c39365_g1|c39424_g1|c39716_g1|c39716_g2|c39721_g1|c40067_g1|c40072_g1|c40625_g1|c40752_g2|c40825_g1|c40990_g1|c41218_g1|c41682_g1|c41804_g1|c41804_g2|c41876_g2|c41964_g2|c42009_g1|c42064_g1|c42201_g1|c42251_g3|c42294_g2|c42802_g2|c43018_g1…	880	1.3e-23	1.47368e-19
GO:0009628	response to abiotic stimulus	225	c16523_g2|c18971_g1|c19641_g1|c22578_g1|c23194_g1|c23991_g1|c27810_g1|c28590_g1|c29209_g1|c30478_g1|c30518_g1|c31685_g1|c32938_g1|c33008_g1|c34444_g1|c34831_g2|c34884_g1|c34946_g2|c35072_g1|c35359_g1|c35521_g1|c35521_g2|c35635_g2|c35719_g1|c36034_g1|c36155_g1|c36162_g1|c36222_g1|c36353_g1|c36868_g1|c37262_g1|c37490_g1|c37740_g1|c37788_g1|c37879_g2|c38122_g1|c38380_g1|c38463_g1|c39001_g1|c39022_g1…	2638	1.8e-22	1.02024e-18
GO:0009755	hormone-mediated signaling pathway	104	c23991_g1|c26255_g1|c27810_g1|c31685_g1|c32267_g1|c33522_g1|c34831_g2|c35453_g1|c36009_g1|c36034_g1|c36925_g1|c37159_g1|c37222_g1|c37398_g1|c37645_g1|c37838_g1|c38906_g2|c39433_g1|c39496_g1|c39588_g1|c39716_g1|c39716_g2|c40460_g1|c40592_g1|c41218_g1|c41297_g1|c41297_g2|c41562_g1|c41804_g1|c41804_g2|c41832_g2|c41934_g1|c41934_g2|c41993_g1|c42009_g1|c42063_g2|c42251_g3|c42294_g2|c43005_g2|c43165_g2…	922	1.3e-18	4.91227e-15
GO:0009725	response to hormone	162	c17117_g1|c23194_g1|c23991_g1|c26255_g1|c27810_g1|c31685_g1|c32267_g1|c33368_g1|c33522_g1|c34444_g1|c34831_g2|c35072_g1|c35453_g1|c36009_g1|c36034_g1|c36925_g1|c37159_g1|c37222_g1|c37262_g1|c37398_g1|c37645_g1|c37838_g1|c38250_g1|c38463_g1|c38906_g2|c39433_g1|c39496_g1|c39588_g1|c39716_g1|c39716_g2|c40437_g1|c40460_g1|c40592_g1|c41218_g1|c41297_g1|c41297_g2|c41562_g1|c41804_g1|c41804_g2|c41832_g2…	1881	1.3e-16	3.6842e-13
GO:0009791	post-embryonic development	143	c17117_g1|c19641_g1|c23991_g1|c24994_g1|c28590_g1|c29834_g1|c30707_g1|c31547_g1|c31656_g1|c31685_g1|c31944_g1|c31961_g1|c32655_g1|c33424_g1|c35072_g1|c35697_g2|c36162_g1|c36626_g1|c37159_g1|c37340_g1|c37368_g1|c38031_g1|c38116_g1|c38279_g1|c38431_g1|c38463_g1|c38799_g2|c39424_g1|c39721_g1|c39764_g1|c40072_g1|c40625_g1|c40752_g2|c40817_g1|c40825_g1|c40990_g1|c41017_g1|c41218_g1|c41682_g1|c41964_g2…	1587	2.3e-16	5.21456e-13
GO:0001101	response to acid chemical	123	c23194_g1|c26255_g1|c27810_g1|c30478_g1|c31685_g1|c33368_g1|c34444_g1|c34831_g2|c35072_g1|c36034_g1|c36804_g1|c37222_g1|c37262_g1|c37645_g1|c37662_g2|c37879_g2|c38463_g1|c38906_g2|c39496_g1|c39716_g1|c39716_g2|c39765_g1|c40029_g1|c40592_g1|c41297_g1|c41297_g2|c41642_g1|c41804_g1|c41804_g2|c42009_g1|c42063_g2|c42201_g1|c42203_g1|c42251_g3|c42287_g2|c42875_g2|c42915_g1|c43005_g2|c43152_g1|c43152_g2…	1284	3.8e-16	7.17947e-13
GO:0009733	response to auxin	60	c17117_g1|c23991_g1|c36009_g1|c36034_g1|c36925_g1|c37159_g1|c37838_g1|c39433_g1|c39588_g1|c39716_g1|c39716_g2|c41218_g1|c41297_g1|c41297_g2|c41562_g1|c41832_g2|c41993_g1|c42063_g2|c42251_g3|c42294_g2|c43230_g1|c43809_g3|c44218_g1|c44263_g2|c44332_g2|c44710_g4|c44769_g1|c44870_g1|c45243_g1|c45351_g7|c45818_g1|c45877_g1|c45877_g2|c46274_g6|c47225_g1|c47513_g2|c47616_g3|c47657_g4|c47712_g1|c47850_g1…	417	6.4e-16	1.03643e-12
GO:0009651	response to salt stress	72	c16523_g2|c18971_g1|c23194_g1|c27810_g1|c30478_g1|c34884_g1|c35072_g1|c35521_g1|c35521_g2|c35635_g2|c36034_g1|c37262_g1|c39716_g1|c39716_g2|c40067_g1|c40220_g1|c40220_g2|c40286_g1|c41297_g1|c41297_g2|c41804_g1|c41804_g2|c42063_g2|c42201_g1|c42547_g1|c42671_g1|c42875_g2|c42915_g1|c43152_g1|c43152_g2|c43230_g1|c43243_g1|c43243_g2|c43460_g1|c43555_g1|c43677_g1|c44313_g1|c44313_g2|c44313_g3|c45168_g1…	603	1.7e-14	2.4089e-11
GO:0032870	cellular response to hormone stimulus	112	c17117_g1|c23991_g1|c26255_g1|c27810_g1|c31685_g1|c32267_g1|c33522_g1|c34444_g1|c34831_g2|c35453_g1|c36009_g1|c36034_g1|c36925_g1|c37159_g1|c37222_g1|c37398_g1|c37645_g1|c37838_g1|c38250_g1|c38906_g2|c39433_g1|c39496_g1|c39588_g1|c39716_g1|c39716_g2|c40460_g1|c40592_g1|c41218_g1|c41297_g1|c41297_g2|c41562_g1|c41804_g1|c41804_g2|c41832_g2|c41934_g1|c41934_g2|c41993_g1|c42009_g1|c42063_g2|c42201_g1…	1184	2e-14	2.51911e-11
GO:1901700	response to oxygen-containing compound	178	c1308_g1|c23159_g1|c23194_g1|c26255_g1|c27810_g1|c30478_g1|c30518_g1|c30804_g1|c30804_g2|c31685_g1|c33368_g1|c33522_g1|c34444_g1|c34831_g2|c35072_g1|c36034_g1|c36804_g1|c37222_g1|c37262_g1|c37490_g1|c37645_g1|c37662_g2|c37879_g2|c38250_g1|c38463_g1|c38906_g2|c39461_g1|c39496_g1|c39588_g1|c39716_g1|c39716_g2|c39765_g1|c40029_g1|c40144_g1|c40437_g1|c40498_g1|c40573_g2|c40592_g1|c41297_g1|c41297_g2|…	2279	3.5e-14	3.9676e-11
GO:0071365	cellular response to auxin stimulus	46	c17117_g1|c23991_g1|c36009_g1|c36034_g1|c36925_g1|c37159_g1|c37838_g1|c39433_g1|c39588_g1|c39716_g1|c39716_g2|c41218_g1|c41562_g1|c41832_g2|c41993_g1|c42251_g3|c42294_g2|c43230_g1|c43809_g3|c44263_g2|c44332_g2|c44710_g4|c45243_g1|c45351_g7|c45818_g1|c45877_g1|c45877_g2|c46274_g6|c47513_g2|c47616_g3|c47712_g1|c47966_g1|c47966_g2|c48760_g1|c48912_g2|c49072_g2|c49486_g1|c49838_g1|c50308_g1|c50944_g1…	290	4.3e-14	4.43135e-11
GO:0009734	auxin-activated signaling pathway	44	c23991_g1|c36009_g1|c36034_g1|c36925_g1|c37159_g1|c37838_g1|c39433_g1|c39588_g1|c39716_g1|c39716_g2|c41218_g1|c41562_g1|c41832_g2|c41993_g1|c42251_g3|c42294_g2|c43230_g1|c43809_g3|c44263_g2|c44332_g2|c44710_g4|c45243_g1|c45351_g7|c45818_g1|c45877_g1|c45877_g2|c46274_g6|c47513_g2|c47616_g3|c47712_g1|c47966_g1|c47966_g2|c48760_g1|c48912_g2|c49072_g2|c49486_g1|c49838_g1|c50944_g1|c51685_g2|c51825_g1…	277	1.5e-13	1.417e-10
GO:0010150	leaf senescence	28	c34444_g1|c36034_g1|c36359_g1|c39716_g1|c39716_g2|c40752_g2|c40990_g1|c41804_g1|c41804_g2|c43165_g2|c43243_g1|c43243_g2|c43460_g1|c43809_g3|c44138_g2|c45040_g1|c46279_g1|c46540_g2|c46540_g3|c47522_g1|c48444_g2|c49315_g1|c49315_g2|c50262_g1|c50680_g2|c52592_g3|c55446_g1|c64005_g1	119	2.2e-13	1.9184e-10
GO:0009719	response to endogenous stimulus	175	c17117_g1|c23159_g1|c23194_g1|c23991_g1|c26255_g1|c27810_g1|c30804_g1|c30804_g2|c31685_g1|c32267_g1|c33368_g1|c33522_g1|c34444_g1|c34831_g2|c35072_g1|c35453_g1|c36009_g1|c36034_g1|c36925_g1|c37159_g1|c37222_g1|c37262_g1|c37398_g1|c37645_g1|c37838_g1|c38013_g1|c38250_g1|c38463_g1|c38906_g2|c39143_g1|c39433_g1|c39496_g1|c39588_g1|c39716_g1|c39716_g2|c40437_g1|c40460_g1|c40465_g1|c40592_g1|c41218_g1…	2285	3.2e-13	2.59109e-10
GO:0048507	meristem development	43	c17117_g1|c31855_g1|c33424_g1|c36626_g1|c37340_g1|c38431_g1|c39365_g1|c40625_g1|c41964_g1|c41964_g2|c42064_g1|c42201_g1|c42802_g2|c43018_g1|c43464_g1|c43561_g1|c44035_g2|c44549_g4|c44710_g4|c45022_g1|c45541_g1|c45654_g3|c46584_g1|c47817_g1|c49289_g1|c50018_g2|c50067_g4|c50308_g1|c50459_g2|c50499_g1|c50722_g1|c50796_g4|c50796_g6|c51015_g3|c51243_g1|c51872_g2|c51975_g1|c52014_g2|c52079_g3|c52197_g1…	273	3.7e-13	2.79621e-10
GO:0010035	response to inorganic substance	123	c1308_g1|c16523_g2|c20316_g1|c27810_g1|c30478_g1|c30518_g1|c32938_g1|c33368_g1|c33522_g1|c35072_g1|c35479_g1|c36034_g1|c37262_g1|c37490_g1|c37879_g2|c38250_g1|c38463_g1|c39461_g1|c39489_g1|c39496_g1|c39632_g1|c39716_g1|c39716_g2|c39765_g1|c40029_g1|c40498_g1|c40750_g1|c41061_g3|c41297_g1|c41297_g2|c41804_g1|c41804_g2|c42063_g2|c42201_g1|c42251_g3|c42547_g1|c42875_g2|c42915_g1|c43005_g2|c43152_g1|…	1415	4.1e-13	2.90485e-10
GO:0006970	response to osmotic stress	79	c16523_g2|c18971_g1|c23194_g1|c27810_g1|c30478_g1|c34444_g1|c34884_g1|c35072_g1|c35521_g1|c35521_g2|c35635_g2|c36034_g1|c37262_g1|c39588_g1|c39716_g1|c39716_g2|c40067_g1|c40220_g1|c40220_g2|c40286_g1|c41297_g1|c41297_g2|c41804_g1|c41804_g2|c42048_g1|c42063_g2|c42201_g1|c42547_g1|c42671_g1|c42875_g2|c42915_g1|c43152_g1|c43152_g2|c43230_g1|c43243_g1|c43243_g2|c43460_g1|c43555_g1|c43677_g1|c44313_g1…	749	7.1e-13	4.73445e-10
GO:0022622	root system development	53	c17117_g1|c23991_g1|c30804_g1|c30804_g2|c35072_g1|c36034_g1|c37041_g1|c39716_g1|c39716_g2|c39872_g1|c39959_g1|c41876_g2|c41964_g2|c42251_g3|c42697_g1|c43959_g1|c44263_g2|c44710_g4|c44787_g1|c45022_g1|c45351_g7|c45389_g2|c45541_g1|c46005_g1|c46492_g1|c47032_g1|c47245_g1|c47513_g2|c47650_g1|c47650_g3|c48118_g1|c48118_g2|c48118_g3|c48378_g1|c48760_g1|c49072_g2|c49601_g4|c49607_g2|c49728_g3|c50129_g4…	402	1.1e-12	6.92756e-10
GO:0010260	animal organ senescence	28	c34444_g1|c36034_g1|c36359_g1|c39716_g1|c39716_g2|c40752_g2|c40990_g1|c41804_g1|c41804_g2|c43165_g2|c43243_g1|c43243_g2|c43460_g1|c43809_g3|c44138_g2|c45040_g1|c46279_g1|c46540_g2|c46540_g3|c47522_g1|c48444_g2|c49315_g1|c49315_g2|c50262_g1|c50680_g2|c52592_g3|c55446_g1|c64005_g1	132	3.3e-12	1.96888e-09
GO:0009415	response to water	47	c27810_g1|c30478_g1|c35072_g1|c37879_g2|c39496_g1|c39765_g1|c40029_g1|c41297_g1|c41297_g2|c41804_g1|c41804_g2|c42063_g2|c42201_g1|c42915_g1|c43005_g2|c43352_g2|c43460_g1|c43600_g1|c43820_g2|c44313_g1|c44313_g2|c44313_g3|c45168_g1|c45191_g1|c45615_g1|c45660_g1|c45828_g1|c46053_g2|c46053_g3|c46526_g1|c47280_g1|c47707_g1|c47855_g2|c48072_g2|c48759_g1|c48805_g2|c48917_g1|c49046_g3|c49440_g1|c49584_g1…	348	8.9e-12	5.04452e-09
GO:0009414	response to water deprivation	45	c27810_g1|c30478_g1|c35072_g1|c37879_g2|c39496_g1|c39765_g1|c40029_g1|c41297_g1|c41297_g2|c41804_g1|c41804_g2|c42063_g2|c42201_g1|c42915_g1|c43005_g2|c43352_g2|c43460_g1|c43820_g2|c44313_g1|c44313_g2|c44313_g3|c45168_g1|c45191_g1|c45615_g1|c45660_g1|c45828_g1|c46053_g2|c46053_g3|c46526_g1|c47280_g1|c47707_g1|c47855_g2|c48072_g2|c48759_g1|c48805_g2|c48917_g1|c49046_g3|c49440_g1|c49584_g1|c50056_g3…	336	3.2e-11	1.72739e-08
GO:0048827	phyllome development	54	c17117_g1|c23991_g1|c31685_g1|c34444_g1|c36034_g1|c36359_g1|c39365_g1|c39716_g1|c39716_g2|c39721_g1|c40067_g1|c40752_g2|c40825_g1|c40990_g1|c41218_g1|c41682_g1|c41804_g1|c41804_g2|c42251_g3|c43018_g1|c43165_g2|c43243_g1|c43243_g2|c43460_g1|c43809_g3|c44138_g2|c44263_g2|c45040_g1|c45503_g1|c46279_g1|c46540_g2|c46540_g3|c47522_g1|c47927_g1|c48444_g2|c49044_g2|c49315_g1|c49315_g2|c49441_g1|c49441_g2…	456	4.5e-11	2.31873e-08
GO:0048364	root development	48	c17117_g1|c23991_g1|c30804_g1|c30804_g2|c35072_g1|c36034_g1|c37041_g1|c39716_g1|c39716_g2|c39872_g1|c39959_g1|c41876_g2|c41964_g2|c42251_g3|c43959_g1|c44263_g2|c44710_g4|c44787_g1|c45022_g1|c45351_g7|c45389_g2|c45541_g1|c46005_g1|c46492_g1|c47032_g1|c47513_g2|c48118_g1|c48118_g2|c48118_g3|c48378_g1|c48760_g1|c49072_g2|c49601_g4|c49607_g2|c49728_g3|c50129_g4|c50308_g1|c50502_g5|c51127_g2|c51243_g1…	395	2.2e-10	1.08431e-07
GO:0010051	xylem and phloem pattern formation	19	c19690_g1|c20307_g1|c31961_g1|c39588_g1|c41148_g1|c41148_g2|c42697_g1|c43561_g1|c44121_g1|c47245_g1|c47650_g1|c47650_g3|c48760_g1|c49289_g1|c49838_g1|c50944_g1|c51243_g1|c51628_g1|c51975_g1	74	3.1e-10	1.46423e-07
GO:0019748	secondary metabolic process	43	c29023_g2|c30478_g1|c32213_g1|c32213_g2|c35072_g1|c35654_g1|c38463_g1|c39027_g1|c39087_g1|c39087_g2|c39087_g3|c40029_g1|c40220_g1|c40220_g2|c40277_g2|c42343_g1|c42466_g1|c43243_g1|c43243_g2|c43677_g1|c45033_g1|c45500_g1|c45828_g1|c46053_g2|c46053_g3|c46072_g1|c46151_g4|c46279_g1|c46528_g5|c46620_g1|c46713_g2|c46737_g1|c47160_g2|c47445_g1|c47635_g1|c47945_g1|c48557_g1|c50896_g1|c50969_g1|c51002_g1…	339	5e-10	2.2236e-07
GO:0071495	cellular response to endogenous stimulus	113	c17117_g1|c23991_g1|c26255_g1|c27810_g1|c31685_g1|c32267_g1|c33522_g1|c34444_g1|c34831_g2|c35453_g1|c36009_g1|c36034_g1|c36925_g1|c37159_g1|c37222_g1|c37398_g1|c37645_g1|c37838_g1|c38250_g1|c38906_g2|c39433_g1|c39496_g1|c39588_g1|c39716_g1|c39716_g2|c40460_g1|c40592_g1|c41218_g1|c41297_g1|c41297_g2|c41562_g1|c41804_g1|c41804_g2|c41832_g2|c41934_g1|c41934_g2|c41993_g1|c42009_g1|c42063_g2|c42201_g1…	1409	5.1e-10	2.2236e-07
GO:0009314	response to radiation	87	c19641_g1|c22578_g1|c23991_g1|c28590_g1|c29209_g1|c30518_g1|c31685_g1|c32938_g1|c33008_g1|c35072_g1|c36155_g1|c36162_g1|c36222_g1|c36353_g1|c36868_g1|c37490_g1|c37740_g1|c39001_g1|c39022_g1|c39375_g2|c39721_g1|c40029_g1|c40072_g1|c40144_g1|c40437_g1|c40752_g2|c40990_g1|c41017_g1|c41281_g1|c41755_g3|c41969_g1|c42503_g1|c42503_g2|c42915_g1|c43152_g1|c43152_g2|c44138_g2|c44627_g1|c44710_g4|c44769_g1…	984	5.5e-10	2.22671e-07
GO:0009416	response to light stimulus	79	c19641_g1|c22578_g1|c23991_g1|c28590_g1|c29209_g1|c30518_g1|c31685_g1|c32938_g1|c33008_g1|c35072_g1|c36155_g1|c36162_g1|c36222_g1|c36868_g1|c37490_g1|c39001_g1|c39022_g1|c39721_g1|c40029_g1|c40072_g1|c40144_g1|c40437_g1|c40752_g2|c40990_g1|c41017_g1|c41755_g3|c41969_g1|c42503_g1|c42503_g2|c42915_g1|c43152_g1|c43152_g2|c44138_g2|c44627_g1|c44710_g4|c44769_g1|c44808_g1|c44870_g1|c45040_g1|c45217_g1…	858	5.5e-10	2.22671e-07
GO:0048366	leaf development	42	c17117_g1|c23991_g1|c34444_g1|c36034_g1|c36359_g1|c39365_g1|c39716_g1|c39716_g2|c40067_g1|c40752_g2|c40990_g1|c41218_g1|c41804_g1|c41804_g2|c43165_g2|c43243_g1|c43243_g2|c43460_g1|c43809_g3|c44138_g2|c44263_g2|c45040_g1|c46279_g1|c46540_g2|c46540_g3|c47522_g1|c47927_g1|c48444_g2|c49044_g2|c49315_g1|c49315_g2|c49441_g1|c49441_g2|c50262_g1|c50308_g1|c50680_g2|c51286_g2|c52592_g3|c52623_g1|c55446_g1…	333	9.5e-10	3.71352e-07
GO:0061458	reproductive system development	109	c17117_g1|c29834_g1|c30707_g1|c31547_g1|c31656_g1|c31685_g1|c31961_g1|c33424_g1|c35697_g2|c36626_g1|c37340_g1|c37368_g1|c38031_g1|c38116_g1|c38279_g1|c38431_g1|c38463_g1|c38799_g2|c39424_g1|c39721_g1|c39764_g1|c40072_g1|c40625_g1|c40817_g1|c40825_g1|c41017_g1|c41218_g1|c41682_g1|c41964_g2|c42009_g1|c42201_g1|c42251_g3|c42294_g2|c42802_g2|c42880_g2|c42977_g1|c43018_g1|c43521_g1|c43549_g1|c43561_g1…	1369	1.6e-09	5.668e-07
GO:0048608	reproductive structure development	109	c17117_g1|c29834_g1|c30707_g1|c31547_g1|c31656_g1|c31685_g1|c31961_g1|c33424_g1|c35697_g2|c36626_g1|c37340_g1|c37368_g1|c38031_g1|c38116_g1|c38279_g1|c38431_g1|c38463_g1|c38799_g2|c39424_g1|c39721_g1|c39764_g1|c40072_g1|c40625_g1|c40817_g1|c40825_g1|c41017_g1|c41218_g1|c41682_g1|c41964_g2|c42009_g1|c42201_g1|c42251_g3|c42294_g2|c42802_g2|c42880_g2|c42977_g1|c43018_g1|c43521_g1|c43549_g1|c43561_g1…	1369	1.6e-09	5.668e-07
GO:0048229	gametophyte development	37	c16523_g2|c22565_g1|c27866_g1|c29834_g1|c36212_g1|c37108_g3|c38122_g1|c39365_g1|c40029_g1|c40072_g1|c40737_g1|c40825_g1|c42251_g3|c45351_g7|c45828_g1|c46053_g2|c46053_g3|c46302_g2|c46380_g2|c46737_g1|c48272_g1|c48879_g1|c48919_g1|c48919_g2|c48919_g4|c49251_g1|c50018_g2|c50459_g2|c50722_g1|c50934_g4|c51134_g1|c52043_g2|c52117_g1|c52193_g1|c52718_g1|c52836_g1|c74495_g1	275	1.6e-09	5.668e-07
GO:0042221	response to chemical	302	c1308_g1|c16523_g2|c17117_g1|c20316_g1|c23159_g1|c23194_g1|c23483_g1|c23991_g1|c26255_g1|c27810_g1|c29023_g2|c30478_g1|c30518_g1|c30804_g1|c30804_g2|c31685_g1|c32213_g1|c32213_g2|c32267_g1|c32938_g1|c33368_g1|c33522_g1|c34444_g1|c34831_g2|c35072_g1|c35453_g1|c35479_g1|c35727_g1|c36009_g1|c36034_g1|c36804_g1|c36925_g1|c37159_g1|c37222_g1|c37262_g1|c37398_g1|c37490_g1|c37645_g1|c37662_g2|c37838_g1|…	5006	2.5e-09	8.58788e-07
GO:0010015	root morphogenesis	28	c17117_g1|c23991_g1|c30804_g1|c30804_g2|c36034_g1|c37041_g1|c39716_g1|c39716_g2|c43959_g1|c44263_g2|c44710_g4|c44787_g1|c45022_g1|c45389_g2|c45541_g1|c46492_g1|c48118_g1|c48118_g2|c48118_g3|c48378_g1|c49072_g2|c49601_g4|c49607_g2|c50308_g1|c50502_g5|c51127_g2|c51243_g1|c75359_g1	177	4.1e-09	1.36699e-06
GO:0009908	flower development	51	c30707_g1|c31685_g1|c35697_g2|c36626_g1|c37368_g1|c38431_g1|c38463_g1|c38799_g2|c39424_g1|c39721_g1|c40072_g1|c40825_g1|c41682_g1|c41964_g2|c42009_g1|c42201_g1|c42251_g3|c42294_g2|c42802_g2|c43018_g1|c43521_g1|c43549_g1|c44013_g1|c44870_g1|c45503_g1|c46070_g1|c47319_g1|c47775_g1|c47927_g1|c49044_g2|c49649_g1|c50018_g2|c50067_g4|c50459_g2|c50722_g1|c51011_g1|c51015_g3|c51142_g2|c51243_g1|c51286_g2…	477	5.4e-09	1.74898e-06
GO:0048316	seed development	48	c17117_g1|c29834_g1|c31547_g1|c31656_g1|c31961_g1|c33424_g1|c37340_g1|c38031_g1|c38116_g1|c38279_g1|c39764_g1|c40625_g1|c40817_g1|c41218_g1|c41964_g2|c43018_g1|c43561_g1|c44035_g2|c44549_g4|c44717_g3|c45500_g1|c46000_g3|c47157_g5|c47635_g1|c48247_g1|c48658_g1|c48658_g2|c48982_g2|c49734_g4|c49753_g2|c49934_g1|c50226_g2|c50308_g1|c50796_g4|c50796_g6|c50873_g2|c50873_g3|c51333_g1|c51975_g1|c52014_g2…	436	5.9e-09	1.85784e-06
GO:0009620	response to fungus	38	c24994_g1|c31702_g1|c35929_g1|c36034_g1|c36868_g1|c37208_g1|c37755_g1|c38463_g1|c38906_g2|c39489_g1|c39716_g1|c39716_g2|c40986_g1|c41143_g1|c41242_g1|c41297_g1|c41297_g2|c42063_g2|c42671_g1|c43165_g2|c44276_g2|c45370_g2|c45675_g1|c46048_g2|c46070_g1|c46424_g1|c47536_g1|c48874_g1|c49649_g1|c50262_g1|c51044_g1|c51114_g1|c51134_g1|c51213_g3|c52006_g1|c52117_g1|c52389_g1|c52718_g1	303	6.9e-09	2.11401e-06
GO:0071229	cellular response to acid chemical	53	c26255_g1|c31685_g1|c34444_g1|c36034_g1|c36804_g1|c37222_g1|c37645_g1|c37662_g2|c38906_g2|c39496_g1|c39716_g1|c39716_g2|c40592_g1|c41297_g1|c41297_g2|c41804_g1|c41804_g2|c42009_g1|c42063_g2|c42201_g1|c42251_g3|c43005_g2|c43152_g1|c43152_g2|c43165_g2|c43460_g1|c43490_g1|c43561_g1|c44022_g2|c44276_g2|c44590_g2|c45191_g1|c46000_g3|c46070_g1|c46563_g2|c46584_g1|c47536_g1|c47707_g1|c48444_g2|c48805_g2…	514	9.5e-09	2.834e-06
GO:0050832	defense response to fungus	33	c24994_g1|c31702_g1|c35929_g1|c36034_g1|c36868_g1|c37208_g1|c37755_g1|c38463_g1|c38906_g2|c39489_g1|c39716_g1|c39716_g2|c40986_g1|c41143_g1|c41242_g1|c41297_g1|c41297_g2|c42063_g2|c42671_g1|c43165_g2|c44276_g2|c45675_g1|c46070_g1|c46424_g1|c47536_g1|c48874_g1|c49649_g1|c50262_g1|c51044_g1|c51114_g1|c51213_g3|c52006_g1|c52389_g1	249	1.7e-08	4.94133e-06
GO:0090567	reproductive shoot system development	51	c30707_g1|c31685_g1|c35697_g2|c36626_g1|c37368_g1|c38431_g1|c38463_g1|c38799_g2|c39424_g1|c39721_g1|c40072_g1|c40825_g1|c41682_g1|c41964_g2|c42009_g1|c42201_g1|c42251_g3|c42294_g2|c42802_g2|c43018_g1|c43521_g1|c43549_g1|c44013_g1|c44870_g1|c45503_g1|c46070_g1|c47319_g1|c47775_g1|c47927_g1|c49044_g2|c49649_g1|c50018_g2|c50067_g4|c50459_g2|c50722_g1|c51011_g1|c51015_g3|c51142_g2|c51243_g1|c51286_g2…	495	1.8e-08	5.1012e-06
GO:0009266	response to temperature stimulus	71	c30518_g1|c34831_g2|c34946_g2|c35359_g1|c35719_g1|c36034_g1|c37490_g1|c37788_g1|c38122_g1|c38380_g1|c38463_g1|c39027_g1|c39496_g1|c39716_g1|c39716_g2|c39765_g1|c39765_g2|c39959_g1|c40286_g1|c40443_g2|c40454_g1|c40538_g1|c41804_g1|c41804_g2|c42201_g1|c42287_g2|c42444_g1|c42546_g1|c42802_g2|c42875_g2|c42915_g1|c43230_g1|c43460_g1|c44276_g2|c44736_g1|c44808_g1|c44870_g1|c45191_g1|c45659_g1|c45660_g1…	801	1.9e-08	5.25327e-06
GO:0010154	fruit development	50	c17117_g1|c29834_g1|c31547_g1|c31656_g1|c31961_g1|c33424_g1|c37340_g1|c38031_g1|c38116_g1|c38279_g1|c39764_g1|c40625_g1|c40817_g1|c41218_g1|c41964_g2|c43018_g1|c43561_g1|c44035_g2|c44549_g4|c44717_g3|c45500_g1|c46000_g3|c47157_g5|c47270_g1|c47635_g1|c48020_g1|c48247_g1|c48658_g1|c48658_g2|c48982_g2|c49734_g4|c49753_g2|c49934_g1|c50226_g2|c50308_g1|c50796_g4|c50796_g6|c50873_g2|c50873_g3|c51333_g1…	483	2.2e-08	5.9379e-06
GO:0009933	meristem structural organization	19	c17117_g1|c31855_g1|c39365_g1|c41964_g1|c41964_g2|c42064_g1|c43018_g1|c43464_g1|c44035_g2|c44549_g4|c49289_g1|c50018_g2|c50308_g1|c50459_g2|c50722_g1|c50796_g4|c50796_g6|c52014_g2|c52079_g3	95	2.7e-08	7.11795e-06
GO:0003006	developmental process involved in reproduction	125	c17117_g1|c22355_g1|c29246_g1|c29834_g1|c30707_g1|c30821_g1|c31547_g1|c31656_g1|c31685_g1|c31961_g1|c33424_g1|c35697_g2|c36626_g1|c37041_g1|c37340_g1|c37368_g1|c38031_g1|c38116_g1|c38132_g1|c38279_g1|c38431_g1|c38463_g1|c38799_g2|c39424_g1|c39721_g1|c39764_g1|c40072_g1|c40625_g1|c40817_g1|c40825_g1|c40894_g1|c41017_g1|c41218_g1|c41682_g1|c41964_g2|c42009_g1|c42201_g1|c42251_g3|c42294_g2|c42393_g1…	1729	3e-08	7.72909e-06
GO:0009737	response to abscisic acid	54	c23194_g1|c26255_g1|c34444_g1|c36034_g1|c37222_g1|c37262_g1|c39496_g1|c39716_g1|c39716_g2|c40592_g1|c41297_g1|c41297_g2|c41804_g1|c41804_g2|c42063_g2|c42201_g1|c42875_g2|c42915_g1|c43460_g1|c43555_g1|c43561_g1|c43820_g2|c44022_g2|c44590_g2|c44787_g1|c44870_g1|c45168_g1|c45191_g1|c45500_g1|c46000_g3|c46151_g4|c47168_g1|c47280_g1|c47635_g1|c47855_g2|c48759_g1|c48864_g1|c48867_g1|c48974_g1|c48982_g2…	553	4.4e-08	1.10841e-05
GO:0009639	response to red or far red light	30	c19641_g1|c22578_g1|c28590_g1|c31685_g1|c35072_g1|c36162_g1|c39721_g1|c40752_g2|c40990_g1|c41755_g3|c42503_g1|c42503_g2|c44138_g2|c44627_g1|c44870_g1|c45040_g1|c46070_g1|c46540_g2|c46540_g3|c47157_g5|c48072_g2|c48348_g3|c49315_g1|c49315_g2|c50680_g2|c51243_g1|c52117_g1|c52718_g1|c55446_g1|c64005_g1	225	6.6e-08	1.62647e-05
GO:0010033	response to organic substance	199	c17117_g1|c23159_g1|c23194_g1|c23991_g1|c26255_g1|c27810_g1|c30804_g1|c30804_g2|c31685_g1|c32267_g1|c33368_g1|c33522_g1|c34444_g1|c34831_g2|c35072_g1|c35453_g1|c36009_g1|c36034_g1|c36804_g1|c36925_g1|c37159_g1|c37222_g1|c37262_g1|c37398_g1|c37645_g1|c37662_g2|c37838_g1|c38013_g1|c38250_g1|c38463_g1|c38906_g2|c39143_g1|c39433_g1|c39496_g1|c39588_g1|c39716_g1|c39716_g2|c40144_g1|c40437_g1|c40460_g1…	3138	7e-08	1.68834e-05
GO:0048532	anatomical structure arrangement	19	c17117_g1|c31855_g1|c39365_g1|c41964_g1|c41964_g2|c42064_g1|c43018_g1|c43464_g1|c44035_g2|c44549_g4|c49289_g1|c50018_g2|c50308_g1|c50459_g2|c50722_g1|c50796_g4|c50796_g6|c52014_g2|c52079_g3	101	7.5e-08	1.77125e-05
GO:0071554	cell wall organization or biogenesis	56	c13970_g1|c16523_g2|c18971_g1|c20307_g1|c23187_g1|c29078_g2|c31961_g1|c34257_g1|c34921_g1|c35907_g1|c35907_g2|c36034_g1|c37710_g1|c37710_g2|c37755_g1|c37781_g1|c38463_g1|c39716_g1|c39716_g2|c40141_g1|c40277_g2|c40308_g1|c40575_g1|c40825_g1|c41242_g1|c42323_g1|c42804_g1|c43061_g2|c43789_g1|c44313_g1|c44313_g2|c44313_g3|c44678_g1|c44972_g1|c44977_g1|c45141_g1|c45324_g1|c45383_g4|c45873_g3|c45873_g4…	597	9.6e-08	2.22093e-05
GO:0009640	photomorphogenesis	18	c19641_g1|c28590_g1|c35072_g1|c36162_g1|c39721_g1|c40752_g2|c40990_g1|c44138_g2|c44627_g1|c45040_g1|c46540_g2|c46540_g3|c49315_g1|c49315_g2|c50680_g2|c51243_g1|c55446_g1|c64005_g1	93	1e-07	2.2672e-05
GO:0010014	meristem initiation	14	c17117_g1|c31855_g1|c41964_g1|c41964_g2|c42064_g1|c43018_g1|c44035_g2|c44549_g4|c49289_g1|c50308_g1|c50796_g4|c50796_g6|c52014_g2|c52079_g3	59	1.9e-07	4.22322e-05
GO:0009793	embryo development ending in seed dormancy	34	c17117_g1|c29834_g1|c31547_g1|c31656_g1|c31961_g1|c33424_g1|c37340_g1|c38279_g1|c40625_g1|c40817_g1|c41218_g1|c41964_g2|c43018_g1|c43561_g1|c44035_g2|c44549_g4|c44717_g3|c47157_g5|c48247_g1|c48658_g1|c48658_g2|c49734_g4|c49934_g1|c50226_g2|c50308_g1|c50796_g4|c50796_g6|c51975_g1|c52014_g2|c52043_g2|c52079_g3|c52198_g1|c52623_g1|c52954_g2	292	2.5e-07	5.45e-05
GO:1902410	mitotic cytokinetic process	12	c13970_g1|c31961_g1|c34257_g1|c36212_g1|c36701_g2|c38432_g1|c45208_g1|c48272_g1|c49251_g1|c52482_g1|c52836_g1|c52963_g2	44	2.8e-07	5.77105e-05
GO:0044550	secondary metabolite biosynthetic process	27	c38463_g1|c39087_g1|c39087_g2|c39087_g3|c40029_g1|c40220_g1|c40220_g2|c40277_g2|c42343_g1|c42466_g1|c43243_g1|c43243_g2|c43677_g1|c45500_g1|c45828_g1|c46053_g2|c46053_g3|c46072_g1|c46151_g4|c47445_g1|c47635_g1|c47945_g1|c48557_g1|c50896_g1|c51002_g1|c51771_g1|c52306_g2	202	2.8e-07	5.77105e-05
GO:0000911	cytokinesis by cell plate formation	12	c13970_g1|c31961_g1|c34257_g1|c36212_g1|c36701_g2|c38432_g1|c45208_g1|c48272_g1|c49251_g1|c52482_g1|c52836_g1|c52963_g2	44	2.8e-07	5.77105e-05
GO:0009832	plant-type cell wall biogenesis	17	c13970_g1|c18971_g1|c20307_g1|c31961_g1|c34257_g1|c37781_g1|c40575_g1|c42804_g1|c44678_g1|c45324_g1|c47970_g1|c50311_g3|c51002_g1|c51771_g1|c52389_g1|c52679_g3|c52963_g2	91	4e-07	7.95509e-05
GO:0010233	phloem transport	8	c42697_g1|c43761_g2|c47245_g1|c47650_g1|c47650_g3|c49838_g1|c51628_g1|c7524_g1	18	4e-07	7.95509e-05
GO:0061640	cytoskeleton-dependent cytokinesis	27	c13970_g1|c18971_g1|c20307_g1|c31961_g1|c34257_g1|c36006_g1|c36212_g1|c36701_g2|c37781_g1|c38432_g1|c40575_g1|c42804_g1|c44678_g1|c45208_g1|c45324_g1|c47970_g1|c48272_g1|c49251_g1|c50311_g3|c51002_g1|c51134_g1|c51771_g1|c52389_g1|c52482_g1|c52679_g3|c52836_g1|c52963_g2	207	4.6e-07	8.99062e-05
GO:0010232	vascular transport	8	c42697_g1|c43761_g2|c47245_g1|c47650_g1|c47650_g3|c49838_g1|c51628_g1|c7524_g1	19	6.6e-07	0.000126809
GO:0051273	beta-glucan metabolic process	21	c34574_g3|c35991_g1|c36546_g1|c37710_g1|c37710_g2|c37781_g1|c39956_g2|c40737_g1|c41197_g1|c41769_g3|c44313_g1|c44313_g2|c44313_g3|c44678_g1|c45511_g2|c45511_g3|c49607_g2|c52389_g1|c52548_g2|c52679_g3|c52837_g1	140	8.6e-07	0.000162483
GO:0010053	root epidermal cell differentiation	18	c30804_g1|c30804_g2|c36034_g1|c37041_g1|c39716_g1|c39716_g2|c43959_g1|c44710_g4|c45022_g1|c45389_g2|c45541_g1|c46492_g1|c49072_g2|c49601_g4|c49607_g2|c50502_g5|c51127_g2|c75359_g1	107	9.3e-07	0.000172828
GO:0009642	response to light intensity	21	c29209_g1|c30518_g1|c36868_g1|c37490_g1|c40144_g1|c41969_g1|c42915_g1|c43152_g1|c43152_g2|c46870_g1|c47157_g5|c47280_g1|c49246_g2|c49246_g3|c49280_g1|c51044_g1|c51068_g2|c51439_g1|c51772_g3|c51865_g3|c52594_g1	141	9.7e-07	0.000177354
GO:0009698	phenylpropanoid metabolic process	23	c35654_g1|c40029_g1|c40220_g1|c40220_g2|c42343_g1|c42466_g1|c43677_g1|c45500_g1|c45828_g1|c46053_g2|c46053_g3|c46072_g1|c46151_g4|c46528_g5|c46737_g1|c47445_g1|c47635_g1|c47945_g1|c48557_g1|c50896_g1|c50969_g1|c51002_g1|c51771_g1	165	9.9e-07	0.000178137
GO:0071669	plant-type cell wall organization or biogenesis	22	c13970_g1|c18971_g1|c20307_g1|c31961_g1|c34257_g1|c37781_g1|c40575_g1|c40825_g1|c42804_g1|c44678_g1|c45324_g1|c45873_g3|c45873_g4|c47970_g1|c49607_g2|c50311_g3|c51002_g1|c51771_g1|c52109_g1|c52389_g1|c52679_g3|c52963_g2	154	1.1e-06	0.000194838
GO:0006351	transcription, DNA-templated	307	c23991_g1|c26439_g1|c27015_g2|c27810_g1|c28425_g2|c29209_g1|c31037_g1|c31466_g1|c31513_g1|c31529_g1|c31547_g1|c31685_g1|c31828_g1|c32267_g1|c33008_g1|c33357_g1|c33368_g1|c33522_g1|c33742_g1|c34028_g1|c34831_g2|c35045_g1|c35112_g1|c35348_g1|c35453_g1|c35719_g1|c36009_g1|c36093_g1|c36353_g1|c36953_g1|c37071_g1|c37071_g2|c37071_g3|c37159_g1|c37296_g1|c37343_g1|c37361_g2|c37368_g1|c37398_g1|c37464_g1…	5445	1.2e-06	0.000206109
GO:0009723	response to ethylene	38	c23991_g1|c27810_g1|c32267_g1|c33368_g1|c33522_g1|c34831_g2|c35453_g1|c36034_g1|c37398_g1|c38250_g1|c39716_g1|c39716_g2|c40460_g1|c41297_g1|c41297_g2|c41934_g1|c41934_g2|c42063_g2|c42671_g1|c43555_g1|c43887_g1|c44263_g2|c45283_g1|c45406_g1|c46000_g2|c48688_g2|c48867_g1|c49441_g1|c49441_g2|c49491_g4|c49584_g1|c49584_g3|c50603_g3|c51944_g2|c52001_g4|c52259_g2|c52326_g3|c52746_g2	370	1.2e-06	0.000206109
GO:0032774	RNA biosynthetic process	310	c23991_g1|c26439_g1|c27015_g2|c27810_g1|c28425_g2|c29209_g1|c30713_g1|c31037_g1|c31466_g1|c31513_g1|c31529_g1|c31547_g1|c31685_g1|c31828_g1|c32267_g1|c33008_g1|c33357_g1|c33368_g1|c33522_g1|c33742_g1|c34028_g1|c34831_g2|c35044_g1|c35045_g1|c35112_g1|c35348_g1|c35453_g1|c35719_g1|c36009_g1|c36093_g1|c36353_g1|c36953_g1|c37071_g1|c37071_g2|c37071_g3|c37159_g1|c37296_g1|c37343_g1|c37361_g2|c37368_g1…	5528	1.7e-06	0.0002834
GO:0010072	primary shoot apical meristem specification	10	c17117_g1|c41964_g2|c43018_g1|c44035_g2|c44549_g4|c50308_g1|c50796_g4|c50796_g6|c52014_g2|c52079_g3	35	1.7e-06	0.0002834
GO:0048508	embryonic meristem development	15	c17117_g1|c33424_g1|c37340_g1|c40625_g1|c41964_g2|c43018_g1|c43561_g1|c44035_g2|c44549_g4|c50308_g1|c50796_g4|c50796_g6|c52014_g2|c52079_g3|c52954_g2	80	1.8e-06	0.000295722
GO:0006979	response to oxidative stress	67	c1308_g1|c20406_g1|c30478_g1|c30518_g1|c34377_g1|c36868_g1|c37262_g1|c37443_g1|c37490_g1|c38250_g1|c38283_g1|c38463_g1|c39461_g1|c39489_g1|c40029_g1|c40498_g1|c42546_g1|c42700_g1|c42915_g1|c43152_g1|c43152_g2|c43274_g1|c43490_g1|c43953_g1|c44292_g1|c44715_g1|c44814_g1|c44945_g1|c45037_g1|c45059_g1|c45059_g2|c45077_g1|c45615_g1|c45631_g1|c45690_g1|c45828_g1|c46053_g2|c46053_g3|c46714_g1|c47052_g1|…	837	1.9e-06	0.000303358
GO:0006950	response to stress	338	c11531_g1|c1308_g1|c16523_g2|c18971_g1|c20406_g1|c2120_g1|c23159_g1|c23194_g1|c24994_g1|c26893_g1|c27810_g1|c28807_g1|c30478_g1|c30518_g1|c31513_g1|c31702_g1|c32938_g1|c33008_g1|c33522_g1|c34364_g1|c34377_g1|c34444_g1|c34831_g2|c34884_g1|c34946_g2|c35072_g1|c35112_g1|c35228_g1|c35359_g1|c35453_g1|c35521_g1|c35521_g2|c35635_g2|c35719_g1|c35905_g1|c35907_g1|c35907_g2|c35929_g1|c36034_g1|c36353_g1|c…	6115	1.9e-06	0.000303358
GO:0090421	embryonic meristem initiation	11	c17117_g1|c31855_g1|c41964_g2|c43018_g1|c44035_g2|c44549_g4|c50308_g1|c50796_g4|c50796_g6|c52014_g2|c52079_g3	44	2.3e-06	0.000357162
GO:0050896	response to stimulus	573	c11531_g1|c11944_g1|c1308_g1|c16523_g2|c17117_g1|c18971_g1|c19641_g1|c20316_g1|c20406_g1|c2120_g1|c22578_g1|c23159_g1|c23194_g1|c23483_g1|c23991_g1|c24994_g1|c26255_g1|c26893_g1|c27015_g2|c27810_g1|c28590_g1|c28807_g1|c29022_g1|c29023_g2|c29209_g1|c29246_g1|c29834_g1|c30478_g1|c30518_g1|c30804_g1|c30804_g2|c31513_g1|c31685_g1|c31702_g1|c32213_g1|c32213_g2|c32267_g1|c32938_g1|c33008_g1|c33368_g1|c…	11155	2.3e-06	0.000357162
GO:0010087	phloem or xylem histogenesis	13	c33424_g1|c37340_g1|c39162_g1|c40625_g1|c42201_g1|c42697_g1|c47245_g1|c47650_g1|c47650_g3|c50796_g4|c50796_g6|c51628_g1|c52954_g2	62	2.4e-06	0.000367654
GO:0007275	multicellular organism development	295	c16523_g2|c17117_g1|c19641_g1|c19690_g1|c20307_g1|c22355_g1|c22565_g1|c22578_g1|c23991_g1|c24994_g1|c27866_g1|c28590_g1|c29016_g1|c29834_g1|c30654_g1|c30707_g1|c30804_g1|c30804_g2|c31203_g1|c31547_g1|c31656_g1|c31685_g1|c31855_g1|c31944_g1|c31961_g1|c32655_g1|c33357_g1|c33424_g1|c33742_g1|c34039_g1|c34444_g1|c34986_g1|c35045_g1|c35072_g1|c35697_g2|c36034_g1|c36162_g1|c36212_g1|c36359_g1|c36626_g1…	5247	2.7e-06	0.000408096
GO:0009699	phenylpropanoid biosynthetic process	19	c40029_g1|c40220_g1|c40220_g2|c42343_g1|c42466_g1|c43677_g1|c45500_g1|c45828_g1|c46053_g2|c46053_g3|c46072_g1|c46151_g4|c47445_g1|c47635_g1|c47945_g1|c48557_g1|c50896_g1|c51002_g1|c51771_g1	127	2.9e-06	0.000432558
GO:0009867	jasmonic acid mediated signaling pathway	14	c31685_g1|c38906_g2|c41297_g1|c41297_g2|c42063_g2|c43005_g2|c43165_g2|c44276_g2|c46070_g1|c47536_g1|c48444_g2|c51134_g1|c52001_g4|c74495_g1	74	3.6e-06	0.000529995
GO:1901701	cellular response to oxygen-containing compound	82	c1308_g1|c26255_g1|c31685_g1|c33522_g1|c34444_g1|c36034_g1|c36804_g1|c37222_g1|c37645_g1|c37662_g2|c38250_g1|c38906_g2|c39461_g1|c39496_g1|c39588_g1|c39716_g1|c39716_g2|c40498_g1|c40573_g2|c40592_g1|c41297_g1|c41297_g2|c41804_g1|c41804_g2|c42009_g1|c42063_g2|c42201_g1|c42251_g3|c43005_g2|c43152_g1|c43152_g2|c43165_g2|c43274_g1|c43460_g1|c43490_g1|c43561_g1|c44022_g2|c44276_g2|c44590_g2|c44715_g1|…	1117	4.3e-06	0.00062348
GO:0009607	response to biotic stimulus	93	c24994_g1|c29022_g1|c30478_g1|c31702_g1|c32938_g1|c33522_g1|c34000_g1|c35112_g1|c35905_g1|c35929_g1|c36006_g1|c36034_g1|c36701_g2|c36804_g1|c36868_g1|c37208_g1|c37398_g1|c37540_g2|c37662_g2|c37755_g1|c38463_g1|c38731_g1|c38906_g2|c39143_g1|c39489_g1|c39716_g1|c39716_g2|c39721_g1|c40277_g2|c40986_g1|c41143_g1|c41242_g1|c41297_g1|c41297_g2|c41969_g1|c42063_g2|c42251_g3|c42467_g3|c42671_g1|c42880_g1…	1314	4.4e-06	0.00062348
GO:0097305	response to alcohol	61	c23194_g1|c26255_g1|c34444_g1|c36034_g1|c37222_g1|c37262_g1|c39496_g1|c39588_g1|c39716_g1|c39716_g2|c40437_g1|c40592_g1|c41297_g1|c41297_g2|c41804_g1|c41804_g2|c42063_g2|c42201_g1|c42875_g2|c42915_g1|c43460_g1|c43555_g1|c43561_g1|c43820_g2|c44022_g2|c44590_g2|c44787_g1|c44870_g1|c45168_g1|c45191_g1|c45500_g1|c46000_g3|c46151_g4|c46653_g2|c47168_g1|c47280_g1|c47635_g1|c47855_g2|c48759_g1|c48864_g1…	757	4.4e-06	0.00062348
GO:0071395	cellular response to jasmonic acid stimulus	14	c31685_g1|c38906_g2|c41297_g1|c41297_g2|c42063_g2|c43005_g2|c43165_g2|c44276_g2|c46070_g1|c47536_g1|c48444_g2|c51134_g1|c52001_g4|c74495_g1	76	5e-06	0.000699753
GO:0009555	pollen development	25	c16523_g2|c27866_g1|c29834_g1|c37108_g3|c38122_g1|c39365_g1|c40029_g1|c40072_g1|c40737_g1|c40825_g1|c42251_g3|c45351_g7|c45828_g1|c46053_g2|c46053_g3|c46302_g2|c46380_g2|c46737_g1|c48272_g1|c49251_g1|c50934_g4|c51134_g1|c52043_g2|c52193_g1|c74495_g1	208	5.4e-06	0.000746517
GO:0044702	single organism reproductive process	120	c17117_g1|c22355_g1|c24994_g1|c29246_g1|c29834_g1|c30707_g1|c30821_g1|c31547_g1|c31656_g1|c31685_g1|c31961_g1|c33424_g1|c35697_g2|c36626_g1|c37041_g1|c37340_g1|c37368_g1|c38031_g1|c38116_g1|c38132_g1|c38279_g1|c38431_g1|c38463_g1|c38799_g2|c39424_g1|c39721_g1|c39764_g1|c40072_g1|c40625_g1|c40817_g1|c40825_g1|c40894_g1|c41218_g1|c41682_g1|c41964_g2|c42009_g1|c42201_g1|c42251_g3|c42294_g2|c42393_g1…	1823	6.3e-06	0.000860443
GO:0000302	response to reactive oxygen species	40	c1308_g1|c30518_g1|c37490_g1|c38250_g1|c38463_g1|c39461_g1|c40498_g1|c42546_g1|c42915_g1|c43152_g1|c43152_g2|c43274_g1|c43490_g1|c44715_g1|c44945_g1|c45037_g1|c45059_g1|c45059_g2|c45077_g1|c45615_g1|c45690_g1|c46714_g1|c47117_g1|c47850_g1|c47880_g1|c48398_g1|c49044_g2|c49246_g2|c49246_g3|c49280_g1|c49375_g1|c49440_g1|c51044_g1|c51439_g1|c51800_g3|c52259_g2|c52385_g1|c52385_g3|c52594_g1|c52744_g2	427	6.4e-06	0.000863695
GO:0098542	defense response to other organism	58	c24994_g1|c30478_g1|c31702_g1|c32938_g1|c33522_g1|c35112_g1|c35929_g1|c36034_g1|c36804_g1|c36868_g1|c37208_g1|c37662_g2|c37755_g1|c38463_g1|c38906_g2|c39143_g1|c39489_g1|c39716_g1|c39716_g2|c40277_g2|c40986_g1|c41143_g1|c41242_g1|c41297_g1|c41297_g2|c42063_g2|c42671_g1|c43165_g2|c43178_g1|c43230_g1|c44276_g2|c45217_g1|c45313_g1|c45313_g3|c45615_g1|c45675_g1|c46070_g1|c46424_g1|c46713_g2|c47536_g1…	717	6.7e-06	0.000893544
GO:0042542	response to hydrogen peroxide	31	c1308_g1|c30518_g1|c37490_g1|c39461_g1|c40498_g1|c42915_g1|c43274_g1|c44715_g1|c44945_g1|c45037_g1|c45059_g1|c45059_g2|c45077_g1|c45615_g1|c46714_g1|c47117_g1|c47850_g1|c47880_g1|c48398_g1|c49246_g2|c49246_g3|c49280_g1|c49375_g1|c49440_g1|c51044_g1|c51439_g1|c51800_g3|c52385_g1|c52385_g3|c52594_g1|c52744_g2	295	7.2e-06	0.00094906
GO:0001708	cell fate specification	12	c19690_g1|c31855_g1|c33742_g1|c37159_g1|c41148_g1|c41148_g2|c45389_g2|c47966_g1|c47966_g2|c48020_g1|c49145_g1|c50094_g1	59	8e-06	0.00104239
GO:0009753	response to jasmonic acid	25	c31685_g1|c33368_g1|c34831_g2|c38463_g1|c38906_g2|c41297_g1|c41297_g2|c42063_g2|c42287_g2|c43005_g2|c43165_g2|c43555_g1|c44276_g2|c44787_g1|c45389_g2|c46070_g1|c46528_g5|c47536_g1|c48444_g2|c48593_g2|c48867_g1|c51134_g1|c51944_g2|c52001_g4|c74495_g1	213	8.2e-06	0.00105631
GO:0051274	beta-glucan biosynthetic process	15	c34574_g3|c36546_g1|c37781_g1|c39956_g2|c40737_g1|c41197_g1|c44313_g1|c44313_g2|c44313_g3|c44678_g1|c45511_g2|c45511_g3|c52389_g1|c52679_g3|c52837_g1	93	1.3e-05	0.00163742
GO:0051707	response to other organism	86	c24994_g1|c29022_g1|c30478_g1|c31702_g1|c32938_g1|c33522_g1|c34000_g1|c35112_g1|c35929_g1|c36006_g1|c36034_g1|c36701_g2|c36804_g1|c36868_g1|c37208_g1|c37662_g2|c37755_g1|c38463_g1|c38731_g1|c38906_g2|c39143_g1|c39489_g1|c39716_g1|c39716_g2|c39721_g1|c40277_g2|c40986_g1|c41143_g1|c41242_g1|c41297_g1|c41297_g2|c41969_g1|c42063_g2|c42251_g3|c42467_g3|c42671_g1|c42880_g1|c43165_g2|c43178_g1|c43230_g1…	1224	1.3e-05	0.00163742
GO:0043207	response to external biotic stimulus	86	c24994_g1|c29022_g1|c30478_g1|c31702_g1|c32938_g1|c33522_g1|c34000_g1|c35112_g1|c35929_g1|c36006_g1|c36034_g1|c36701_g2|c36804_g1|c36868_g1|c37208_g1|c37662_g2|c37755_g1|c38463_g1|c38731_g1|c38906_g2|c39143_g1|c39489_g1|c39716_g1|c39716_g2|c39721_g1|c40277_g2|c40986_g1|c41143_g1|c41242_g1|c41297_g1|c41297_g2|c41969_g1|c42063_g2|c42251_g3|c42467_g3|c42671_g1|c42880_g1|c43165_g2|c43178_g1|c43230_g1…	1226	1.4e-05	0.001744
GO:0048527	lateral root development	14	c23991_g1|c35072_g1|c41964_g2|c42251_g3|c44263_g2|c44787_g1|c46005_g1|c48118_g1|c48118_g2|c48118_g3|c48378_g1|c51883_g2|c52079_g3|c52893_g2	84	1.6e-05	0.00197148
GO:0009913	epidermal cell differentiation	30	c30654_g1|c30804_g1|c30804_g2|c31961_g1|c33742_g1|c36034_g1|c37041_g1|c39365_g1|c39716_g1|c39716_g2|c43959_g1|c44519_g1|c44710_g4|c45022_g1|c45389_g2|c45541_g1|c46492_g1|c46584_g1|c46669_g3|c49046_g3|c49072_g2|c49145_g1|c49601_g4|c49607_g2|c50502_g5|c51127_g2|c51872_g2|c51917_g2|c52319_g2|c75359_g1	296	2e-05	0.00243785
GO:0009644	response to high light intensity	14	c29209_g1|c30518_g1|c37490_g1|c42915_g1|c46870_g1|c47280_g1|c49246_g2|c49246_g3|c49280_g1|c51044_g1|c51068_g2|c51439_g1|c51865_g3|c52594_g1	86	2.2e-05	0.00265311
GO:0044767	single-organism developmental process	328	c16523_g2|c17117_g1|c19641_g1|c19690_g1|c20307_g1|c20316_g1|c22355_g1|c22565_g1|c22578_g1|c23991_g1|c24994_g1|c27015_g2|c27866_g1|c28590_g1|c29016_g1|c29246_g1|c29834_g1|c30654_g1|c30707_g1|c30804_g1|c30804_g2|c30821_g1|c31203_g1|c31547_g1|c31656_g1|c31685_g1|c31855_g1|c31944_g1|c31961_g1|c32655_g1|c33357_g1|c33424_g1|c33742_g1|c34039_g1|c34444_g1|c34574_g3|c34986_g1|c35045_g1|c35072_g1|c35697_g2…	6083	2.4e-05	0.002834
GO:0003002	regionalization	35	c19690_g1|c20307_g1|c31961_g1|c33742_g1|c35045_g1|c37197_g1|c39588_g1|c41148_g1|c41148_g2|c41260_g1|c41443_g1|c41964_g1|c41964_g2|c42697_g1|c43018_g1|c43549_g1|c43561_g1|c44121_g1|c45773_g1|c47100_g1|c47245_g1|c47650_g1|c47650_g3|c47927_g1|c48760_g1|c49046_g3|c49289_g1|c49838_g1|c50067_g4|c50094_g1|c50944_g1|c51243_g1|c51282_g1|c51628_g1|c51975_g1	374	2.4e-05	0.002834
GO:0009408	response to heat	36	c30518_g1|c34831_g2|c34946_g2|c35359_g1|c36034_g1|c37490_g1|c37788_g1|c38122_g1|c38380_g1|c38463_g1|c39716_g1|c39716_g2|c40443_g2|c40538_g1|c42444_g1|c42546_g1|c42915_g1|c43230_g1|c44276_g2|c44736_g1|c45659_g1|c46985_g2|c47949_g1|c48072_g2|c48111_g3|c48907_g4|c49246_g2|c49246_g3|c49280_g1|c49440_g1|c50654_g1|c50801_g2|c51044_g1|c51114_g1|c51439_g1|c52594_g1	390	2.5e-05	0.00289184
GO:0009409	response to cold	38	c34831_g2|c35719_g1|c39027_g1|c39496_g1|c39765_g1|c39765_g2|c39959_g1|c40286_g1|c40454_g1|c41804_g1|c41804_g2|c42201_g1|c42287_g2|c42802_g2|c42875_g2|c42915_g1|c43230_g1|c43460_g1|c44808_g1|c44870_g1|c45191_g1|c45660_g1|c46025_g1|c46526_g1|c46713_g2|c47280_g1|c47648_g1|c47850_g1|c48072_g2|c48864_g1|c49584_g1|c50407_g1|c51134_g1|c51755_g2|c51755_g3|c51772_g3|c52420_g1|c52441_g1	421	2.5e-05	0.00289184
GO:0006952	defense response	102	c20406_g1|c23159_g1|c24994_g1|c30478_g1|c31702_g1|c32938_g1|c33522_g1|c35112_g1|c35453_g1|c35905_g1|c35907_g1|c35907_g2|c35929_g1|c36034_g1|c36804_g1|c36868_g1|c37208_g1|c37343_g1|c37540_g2|c37662_g2|c37755_g1|c38417_g1|c38463_g1|c38526_g1|c38906_g2|c39143_g1|c39489_g1|c39621_g1|c39716_g1|c39716_g2|c40277_g2|c40621_g1|c40986_g1|c41143_g1|c41242_g1|c41297_g1|c41297_g2|c42063_g2|c42251_g3|c42671_g1…	1543	2.7e-05	0.00306072
GO:0071310	cellular response to organic substance	126	c17117_g1|c23991_g1|c26255_g1|c27810_g1|c31685_g1|c32267_g1|c33522_g1|c34444_g1|c34831_g2|c35453_g1|c36009_g1|c36034_g1|c36804_g1|c36925_g1|c37159_g1|c37222_g1|c37398_g1|c37645_g1|c37662_g2|c37838_g1|c38250_g1|c38906_g2|c39433_g1|c39496_g1|c39588_g1|c39716_g1|c39716_g2|c40460_g1|c40573_g2|c40592_g1|c40894_g1|c41218_g1|c41297_g1|c41297_g2|c41562_g1|c41804_g1|c41804_g2|c41832_g2|c41934_g1|c41934_g2…	1998	2.7e-05	0.00306072
GO:0032502	developmental process	331	c16523_g2|c17117_g1|c19641_g1|c19690_g1|c20307_g1|c20316_g1|c22355_g1|c22565_g1|c22578_g1|c23991_g1|c24994_g1|c27015_g2|c27866_g1|c28590_g1|c29016_g1|c29246_g1|c29834_g1|c30654_g1|c30707_g1|c30804_g1|c30804_g2|c30821_g1|c31203_g1|c31547_g1|c31656_g1|c31685_g1|c31855_g1|c31944_g1|c31961_g1|c32655_g1|c33357_g1|c33424_g1|c33742_g1|c34039_g1|c34444_g1|c34574_g3|c34986_g1|c35045_g1|c35072_g1|c35697_g2…	6158	2.8e-05	0.00311184
GO:0022414	reproductive process	133	c17117_g1|c22355_g1|c24994_g1|c29246_g1|c29834_g1|c30707_g1|c30821_g1|c31547_g1|c31656_g1|c31685_g1|c31961_g1|c33424_g1|c35697_g2|c36626_g1|c37041_g1|c37340_g1|c37368_g1|c38031_g1|c38116_g1|c38132_g1|c38279_g1|c38431_g1|c38463_g1|c38799_g2|c39424_g1|c39721_g1|c39764_g1|c40072_g1|c40517_g1|c40625_g1|c40817_g1|c40825_g1|c40894_g1|c41017_g1|c41143_g1|c41218_g1|c41682_g1|c41964_g2|c42009_g1|c42201_g1…	2133	2.8e-05	0.00311184
GO:0009751	response to salicylic acid	22	c33368_g1|c34444_g1|c34831_g2|c36804_g1|c37662_g2|c41297_g1|c41297_g2|c41642_g1|c42063_g2|c42203_g1|c43165_g2|c43555_g1|c44276_g2|c45018_g2|c45389_g2|c46151_g4|c46528_g5|c47657_g4|c47850_g1|c48867_g1|c49844_g4|c51134_g1	188	2.9e-05	0.00319169
GO:0010016	shoot system morphogenesis	22	c17117_g1|c29016_g1|c33424_g1|c37340_g1|c40625_g1|c41964_g2|c42064_g1|c43018_g1|c44035_g2|c44549_g4|c46669_g3|c47384_g1|c47927_g1|c49607_g2|c50067_g4|c50308_g1|c50796_g4|c50796_g6|c52014_g2|c52079_g3|c52212_g2|c52954_g2	191	3.7e-05	0.004033
GO:0007389	pattern specification process	39	c19690_g1|c20307_g1|c31855_g1|c31961_g1|c33742_g1|c35045_g1|c37197_g1|c39588_g1|c41148_g1|c41148_g2|c41260_g1|c41443_g1|c41964_g1|c41964_g2|c42697_g1|c43018_g1|c43549_g1|c43561_g1|c44121_g1|c44710_g4|c45773_g1|c47100_g1|c47245_g1|c47513_g2|c47650_g1|c47650_g3|c47927_g1|c48760_g1|c49046_g3|c49289_g1|c49734_g4|c49838_g1|c50067_g4|c50094_g1|c50944_g1|c51243_g1|c51282_g1|c51628_g1|c51975_g1	446	4e-05	0.00431848
GO:0008544	epidermis development	35	c30654_g1|c30804_g1|c30804_g2|c31961_g1|c32655_g1|c33742_g1|c36034_g1|c37041_g1|c39365_g1|c39716_g1|c39716_g2|c43959_g1|c44519_g1|c44710_g4|c45022_g1|c45389_g2|c45541_g1|c46492_g1|c46584_g1|c46669_g3|c48118_g1|c48118_g2|c48118_g3|c49046_g3|c49072_g2|c49145_g1|c49601_g4|c49607_g2|c50502_g5|c51127_g2|c51872_g2|c51917_g2|c52212_g2|c52319_g2|c75359_g1	385	4.4e-05	0.00470551
GO:0048731	system development	227	c17117_g1|c22355_g1|c23991_g1|c29016_g1|c29834_g1|c30654_g1|c30707_g1|c30804_g1|c30804_g2|c31203_g1|c31547_g1|c31656_g1|c31685_g1|c31855_g1|c31961_g1|c32655_g1|c33424_g1|c33742_g1|c34444_g1|c35045_g1|c35072_g1|c35697_g2|c36034_g1|c36359_g1|c36626_g1|c37041_g1|c37340_g1|c37368_g1|c38031_g1|c38116_g1|c38132_g1|c38152_g1|c38279_g1|c38431_g1|c38463_g1|c38799_g2|c39365_g1|c39424_g1|c39716_g1|c39716_g2…	4041	5.1e-05	0.00540314
GO:0071215	cellular response to abscisic acid stimulus	26	c26255_g1|c34444_g1|c36034_g1|c37222_g1|c39496_g1|c39716_g1|c39716_g2|c40592_g1|c41297_g1|c41297_g2|c41804_g1|c41804_g2|c42063_g2|c42201_g1|c43460_g1|c43561_g1|c44022_g2|c44590_g2|c45191_g1|c46000_g3|c48864_g1|c48974_g1|c50146_g1|c51595_g1|c52721_g1|c52893_g2	253	5.6e-05	0.00587793
GO:0010088	phloem development	6	c39162_g1|c42697_g1|c47245_g1|c47650_g1|c47650_g3|c51628_g1	17	5.8e-05	0.006032
GO:0048764	trichoblast maturation	13	c36034_g1|c37041_g1|c39716_g1|c39716_g2|c43959_g1|c44710_g4|c45022_g1|c45541_g1|c46492_g1|c49072_g2|c49601_g4|c49607_g2|c51127_g2	83	6.4e-05	0.00653607
GO:0048765	root hair cell differentiation	13	c36034_g1|c37041_g1|c39716_g1|c39716_g2|c43959_g1|c44710_g4|c45022_g1|c45541_g1|c46492_g1|c49072_g2|c49601_g4|c49607_g2|c51127_g2	83	6.4e-05	0.00653607
GO:0033993	response to lipid	71	c23194_g1|c26255_g1|c31685_g1|c33368_g1|c34444_g1|c36034_g1|c37222_g1|c37262_g1|c37645_g1|c39496_g1|c39588_g1|c39716_g1|c39716_g2|c40437_g1|c40592_g1|c41297_g1|c41297_g2|c41804_g1|c41804_g2|c42009_g1|c42063_g2|c42201_g1|c42875_g2|c42915_g1|c43460_g1|c43490_g1|c43555_g1|c43561_g1|c43820_g2|c44022_g2|c44590_g2|c44787_g1|c44870_g1|c45168_g1|c45191_g1|c45500_g1|c46000_g3|c46151_g4|c46584_g1|c46653_g2…	1007	6.6e-05	0.00668014
GO:2000605	positive regulation of secondary growth	3	c40547_g1|c41575_g1|c52331_g1	3	8.4e-05	0.00835284
GO:2000603	regulation of secondary growth	3	c40547_g1|c41575_g1|c52331_g1	3	8.4e-05	0.00835284
GO:0010054	trichoblast differentiation	14	c36034_g1|c37041_g1|c39716_g1|c39716_g2|c43959_g1|c44710_g4|c45022_g1|c45389_g2|c45541_g1|c46492_g1|c49072_g2|c49601_g4|c49607_g2|c51127_g2	97	8.5e-05	0.00837878
GO:0048569	post-embryonic animal organ development	33	c23991_g1|c30707_g1|c31685_g1|c35072_g1|c35697_g2|c39721_g1|c40825_g1|c41682_g1|c41964_g2|c42251_g3|c43018_g1|c43549_g1|c44263_g2|c44519_g1|c44787_g1|c45503_g1|c46005_g1|c47927_g1|c48118_g1|c48118_g2|c48118_g3|c48378_g1|c50018_g2|c50067_g4|c50459_g2|c50722_g1|c51883_g2|c51917_g2|c52079_g3|c52656_g1|c52746_g2|c52893_g2|c71452_g1	368	9.3e-05	0.00908834
GO:0010345	suberin biosynthetic process	7	c40220_g1|c40220_g2|c43677_g1|c47445_g1|c47945_g1|c51002_g1|c51771_g1	26	9.7e-05	0.00939822
GO:0097306	cellular response to alcohol	31	c26255_g1|c34444_g1|c36034_g1|c37222_g1|c39496_g1|c39588_g1|c39716_g1|c39716_g2|c40592_g1|c41297_g1|c41297_g2|c41804_g1|c41804_g2|c42063_g2|c42201_g1|c43460_g1|c43561_g1|c44022_g2|c44590_g2|c45191_g1|c46000_g3|c46653_g2|c48864_g1|c48974_g1|c49432_g2|c49838_g1|c50146_g1|c50944_g1|c51595_g1|c52721_g1|c52893_g2	338	0.0001	0.00952605
GO:0071555	cell wall organization	25	c16523_g2|c18971_g1|c34921_g1|c36034_g1|c37710_g1|c37710_g2|c37755_g1|c38463_g1|c39716_g1|c39716_g2|c40277_g2|c40308_g1|c40825_g1|c41242_g1|c43789_g1|c45873_g3|c45873_g4|c47348_g1|c47657_g4|c49607_g2|c51002_g1|c51049_g1|c51771_g1|c52109_g1|c52306_g2	248	0.0001	0.00952605
GO:0071369	cellular response to ethylene stimulus	27	c27810_g1|c32267_g1|c33522_g1|c34831_g2|c35453_g1|c36034_g1|c37398_g1|c38250_g1|c39716_g1|c39716_g2|c40460_g1|c41934_g1|c41934_g2|c43887_g1|c45283_g1|c45406_g1|c46000_g2|c49441_g1|c49441_g2|c49491_g4|c49584_g1|c49584_g3|c50603_g3|c52001_g4|c52259_g2|c52326_g3|c52746_g2	279	0.00011	0.0103913
GO:0048528	post-embryonic root development	15	c23991_g1|c35072_g1|c41964_g2|c42251_g3|c44263_g2|c44787_g1|c46005_g1|c48118_g1|c48118_g2|c48118_g3|c48378_g1|c51883_g2|c52079_g3|c52746_g2|c52893_g2	112	0.00012	0.0112423
GO:0010588	cotyledon vascular tissue pattern formation	7	c42697_g1|c43561_g1|c47245_g1|c47650_g1|c47650_g3|c48760_g1|c51628_g1	27	0.00013	0.0120793
GO:0043588	skin development	35	c30654_g1|c30804_g1|c30804_g2|c31961_g1|c32655_g1|c33742_g1|c36034_g1|c37041_g1|c39365_g1|c39716_g1|c39716_g2|c43959_g1|c44519_g1|c44710_g4|c45022_g1|c45389_g2|c45541_g1|c46492_g1|c46584_g1|c46669_g3|c48118_g1|c48118_g2|c48118_g3|c49046_g3|c49072_g2|c49145_g1|c49601_g4|c49607_g2|c50502_g5|c51127_g2|c51872_g2|c51917_g2|c52212_g2|c52319_g2|c75359_g1	408	0.00014	0.0126963
GO:0042742	defense response to bacterium	34	c30478_g1|c33522_g1|c35112_g1|c36034_g1|c37208_g1|c37662_g2|c38463_g1|c39716_g1|c39716_g2|c40277_g2|c41297_g1|c41297_g2|c42063_g2|c42671_g1|c43165_g2|c43178_g1|c43230_g1|c44276_g2|c45313_g1|c45313_g3|c45615_g1|c46424_g1|c46713_g2|c47536_g1|c47769_g1|c48874_g1|c50757_g2|c50961_g2|c52001_g4|c52152_g1|c52306_g2|c52389_g1|c52904_g1|c74495_g1	392	0.00014	0.0126963
GO:0000281	mitotic cytokinesis	12	c13970_g1|c31961_g1|c34257_g1|c36212_g1|c36701_g2|c38432_g1|c45208_g1|c48272_g1|c49251_g1|c52482_g1|c52836_g1|c52963_g2	78	0.00014	0.0126963
GO:0070887	cellular response to chemical stimulus	149	c1308_g1|c17117_g1|c23991_g1|c26255_g1|c27810_g1|c31685_g1|c32267_g1|c33522_g1|c34444_g1|c34831_g2|c35453_g1|c36009_g1|c36034_g1|c36804_g1|c36925_g1|c37159_g1|c37222_g1|c37398_g1|c37645_g1|c37662_g2|c37838_g1|c38250_g1|c38906_g2|c39433_g1|c39461_g1|c39496_g1|c39588_g1|c39716_g1|c39716_g2|c40460_g1|c40498_g1|c40573_g2|c40592_g1|c40894_g1|c41218_g1|c41297_g1|c41297_g2|c41562_g1|c41804_g1|c41804_g2|…	2531	0.00015	0.0134952
GO:0009873	ethylene-activated signaling pathway	25	c27810_g1|c32267_g1|c33522_g1|c34831_g2|c35453_g1|c36034_g1|c37398_g1|c39716_g1|c39716_g2|c40460_g1|c41934_g1|c41934_g2|c43887_g1|c45283_g1|c45406_g1|c46000_g2|c49441_g1|c49441_g2|c49491_g4|c49584_g1|c49584_g3|c50603_g3|c52001_g4|c52326_g3|c52746_g2	256	0.00017	0.0151742
GO:0042545	cell wall modification	19	c16523_g2|c34921_g1|c36034_g1|c37710_g1|c37710_g2|c37755_g1|c38463_g1|c39716_g1|c39716_g2|c40277_g2|c40308_g1|c40825_g1|c41242_g1|c43789_g1|c47348_g1|c47657_g4|c51049_g1|c52109_g1|c52306_g2	170	0.00018	0.0159413
GO:0005976	polysaccharide metabolic process	59	c23187_g1|c29078_g2|c29658_g1|c30993_g1|c34574_g3|c34921_g1|c35599_g1|c35991_g1|c36546_g1|c37710_g1|c37710_g2|c37755_g1|c37781_g1|c38485_g2|c39726_g3|c39956_g2|c40141_g1|c40575_g1|c40737_g1|c40825_g1|c41197_g1|c41242_g1|c41263_g1|c41769_g3|c42323_g1|c42804_g1|c43061_g2|c43352_g2|c43789_g1|c44313_g1|c44313_g2|c44313_g3|c44678_g1|c44972_g1|c45141_g1|c45511_g2|c45511_g3|c46880_g1|c47348_g1|c47530_g2…	826	0.00019	0.0166964
GO:0080117	secondary growth	4	c40547_g1|c41575_g1|c42201_g1|c52331_g1	8	0.00022	0.0188933
GO:0046244	salicylic acid catabolic process	4	c40029_g1|c45828_g1|c46053_g2|c46053_g3	8	0.00022	0.0188933
GO:0080190	lateral growth	4	c40547_g1|c41575_g1|c42201_g1|c52331_g1	8	0.00022	0.0188933
GO:0031086	nuclear-transcribed mRNA catabolic process, deadenylation-independent decay	5	c17117_g1|c31802_g1|c50308_g1|c50553_g1|c60617_g1	14	0.00023	0.0194573
GO:0031087	deadenylation-independent decapping of nuclear-transcribed mRNA	5	c17117_g1|c31802_g1|c50308_g1|c50553_g1|c60617_g1	14	0.00023	0.0194573
GO:0000910	cytokinesis	34	c13970_g1|c18971_g1|c20307_g1|c31961_g1|c34257_g1|c36006_g1|c36212_g1|c36334_g1|c36701_g2|c37781_g1|c38432_g1|c40575_g1|c42804_g1|c44678_g1|c45186_g2|c45208_g1|c45324_g1|c46937_g1|c47176_g1|c47176_g2|c47184_g7|c47970_g1|c48272_g1|c48912_g2|c49251_g1|c50311_g3|c51002_g1|c51134_g1|c51771_g1|c52389_g1|c52482_g1|c52679_g3|c52836_g1|c52963_g2	404	0.00025	0.0209926
GO:0030243	cellulose metabolic process	14	c35991_g1|c37710_g1|c37710_g2|c37781_g1|c39956_g2|c41769_g3|c44313_g1|c44313_g2|c44313_g3|c44678_g1|c49607_g2|c52389_g1|c52548_g2|c52679_g3	108	0.00027	0.0225053
GO:0048580	regulation of post-embryonic development	27	c28590_g1|c40072_g1|c41682_g1|c42201_g1|c43316_g1|c43521_g1|c43549_g1|c44627_g1|c44870_g1|c46070_g1|c47775_g1|c48118_g1|c48118_g2|c48118_g3|c48982_g2|c49046_g3|c49649_g1|c51015_g3|c51243_g1|c51755_g2|c51755_g3|c52590_g2|c52656_g1|c52746_g2|c52893_g2|c52936_g2|c71452_g1	295	0.00028	0.0231685
GO:0009814	defense response, incompatible interaction	19	c32938_g1|c36034_g1|c36804_g1|c37208_g1|c38463_g1|c39143_g1|c39716_g1|c39716_g2|c40277_g2|c42671_g1|c43165_g2|c43178_g1|c44276_g2|c45217_g1|c45615_g1|c46424_g1|c48874_g1|c50961_g2|c51134_g1	176	0.00029	0.023822
GO:0040020	regulation of meiotic nuclear division	8	c36353_g1|c37740_g1|c39375_g2|c46833_g1|c47817_g1|c50499_g1|c52197_g1|c52197_g3	40	0.0003	0.0244662
GO:0006074	(1->3)-beta-D-glucan metabolic process	7	c34574_g3|c36546_g1|c40737_g1|c41197_g1|c45511_g2|c45511_g3|c52837_g1	31	0.00032	0.0257271
GO:0006075	(1->3)-beta-D-glucan biosynthetic process	7	c34574_g3|c36546_g1|c40737_g1|c41197_g1|c45511_g2|c45511_g3|c52837_g1	31	0.00032	0.0257271
GO:0015700	arsenite transport	5	c40621_g1|c52306_g2|c52555_g1|c52555_g2|c52555_g4	15	0.00034	0.0269527
GO:0045491	xylan metabolic process	9	c23187_g1|c29078_g2|c40575_g1|c42323_g1|c42804_g1|c43061_g2|c46880_g1|c47970_g1|c50311_g3	51	0.00034	0.0269527
GO:0048856	anatomical structure development	283	c16523_g2|c17117_g1|c22355_g1|c22565_g1|c23991_g1|c27866_g1|c29016_g1|c29246_g1|c29834_g1|c30654_g1|c30707_g1|c30804_g1|c30804_g2|c30821_g1|c31203_g1|c31547_g1|c31656_g1|c31685_g1|c31855_g1|c31944_g1|c31961_g1|c32655_g1|c33424_g1|c33742_g1|c34444_g1|c34574_g3|c35045_g1|c35072_g1|c35697_g2|c36034_g1|c36212_g1|c36359_g1|c36546_g1|c36626_g1|c36701_g2|c37041_g1|c37108_g3|c37340_g1|c37368_g1|c38031_g1…	5349	0.00035	0.0275528
GO:0044707	single-multicellular organism process	305	c16523_g2|c17117_g1|c19641_g1|c19690_g1|c20307_g1|c22355_g1|c22565_g1|c22578_g1|c23991_g1|c24994_g1|c27866_g1|c28590_g1|c29016_g1|c29834_g1|c30654_g1|c30707_g1|c30804_g1|c30804_g2|c31203_g1|c31547_g1|c31656_g1|c31685_g1|c31855_g1|c31944_g1|c31961_g1|c32655_g1|c33357_g1|c33424_g1|c33742_g1|c34039_g1|c34444_g1|c34986_g1|c35045_g1|c35072_g1|c35697_g2|c36034_g1|c36084_g1|c36162_g1|c36212_g1|c36359_g1…	5831	0.00043	0.0336171
GO:0019757	glycosinolate metabolic process	10	c38463_g1|c39087_g1|c39087_g2|c39087_g3|c40277_g2|c46620_g1|c46713_g2|c47160_g2|c51545_g1|c52306_g2	64	0.00045	0.0344676
GO:0019760	glucosinolate metabolic process	10	c38463_g1|c39087_g1|c39087_g2|c39087_g3|c40277_g2|c46620_g1|c46713_g2|c47160_g2|c51545_g1|c52306_g2	64	0.00045	0.0344676
GO:0016143	S-glycoside metabolic process	10	c38463_g1|c39087_g1|c39087_g2|c39087_g3|c40277_g2|c46620_g1|c46713_g2|c47160_g2|c51545_g1|c52306_g2	64	0.00045	0.0344676
GO:0000160	phosphorelay signal transduction system	26	c27810_g1|c32267_g1|c33522_g1|c34831_g2|c35453_g1|c36034_g1|c37398_g1|c39716_g1|c39716_g2|c40460_g1|c41934_g1|c41934_g2|c43887_g1|c45283_g1|c45406_g1|c46000_g2|c48348_g3|c49441_g1|c49441_g2|c49491_g4|c49584_g1|c49584_g3|c50603_g3|c52001_g4|c52326_g3|c52746_g2	289	0.00047	0.0352842
GO:0009800	cinnamic acid biosynthetic process	5	c40029_g1|c45828_g1|c46053_g2|c46053_g3|c46151_g4	16	0.00047	0.0352842
GO:0009803	cinnamic acid metabolic process	5	c40029_g1|c45828_g1|c46053_g2|c46053_g3|c46151_g4	16	0.00047	0.0352842
GO:0010073	meristem maintenance	13	c36626_g1|c38431_g1|c44710_g4|c45022_g1|c45541_g1|c45654_g3|c50018_g2|c50067_g4|c50459_g2|c50722_g1|c51015_g3|c51243_g1|c51872_g2	101	0.00048	0.0355639
GO:0033275	actin-myosin filament sliding	6	c47176_g1|c47176_g2|c47184_g7|c51282_g1|c51946_g2|c52680_g1	24	0.00048	0.0355639
GO:0032501	multicellular organismal process	313	c16523_g2|c17117_g1|c19641_g1|c19690_g1|c20307_g1|c22355_g1|c22565_g1|c22578_g1|c23991_g1|c24994_g1|c27866_g1|c28590_g1|c29016_g1|c29246_g1|c29834_g1|c30654_g1|c30707_g1|c30804_g1|c30804_g2|c30821_g1|c31203_g1|c31547_g1|c31656_g1|c31685_g1|c31855_g1|c31944_g1|c31961_g1|c32655_g1|c33357_g1|c33424_g1|c33742_g1|c34039_g1|c34444_g1|c34986_g1|c35045_g1|c35072_g1|c35697_g2|c36034_g1|c36084_g1|c36162_g1…	6017	0.00051	0.0375413
GO:0010224	response to UV-B	11	c32938_g1|c33008_g1|c40029_g1|c43152_g1|c43152_g2|c45217_g1|c45828_g1|c46053_g2|c46053_g3|c46528_g5|c49440_g1	77	0.00052	0.0380305
GO:0045229	external encapsulating structure organization	28	c16523_g2|c18971_g1|c34921_g1|c36034_g1|c37710_g1|c37710_g2|c37755_g1|c38463_g1|c39716_g1|c39716_g2|c40277_g2|c40308_g1|c40825_g1|c41242_g1|c43789_g1|c45873_g3|c45873_g4|c46302_g2|c47348_g1|c47657_g4|c49607_g2|c51002_g1|c51049_g1|c51771_g1|c52043_g2|c52109_g1|c52193_g1|c52306_g2	324	0.00055	0.0397121
GO:0007018	microtubule-based movement	28	c34884_g1|c38432_g1|c40902_g1|c42723_g1|c43856_g1|c44422_g1|c44551_g2|c45208_g1|c45821_g1|c47417_g1|c48272_g1|c49251_g1|c49755_g1|c50594_g1|c50674_g1|c50674_g2|c51184_g1|c51276_g1|c51690_g3|c51690_g6|c51690_g7|c51866_g1|c52454_g2|c52467_g1|c52500_g1|c52528_g1|c52552_g2|c52673_g1	324	0.00055	0.0397121
GO:0009738	abscisic acid-activated signaling pathway	22	c26255_g1|c36034_g1|c37222_g1|c39496_g1|c39716_g1|c39716_g2|c40592_g1|c41297_g1|c41297_g2|c41804_g1|c41804_g2|c42063_g2|c43460_g1|c43561_g1|c44022_g2|c44590_g2|c45191_g1|c48974_g1|c50146_g1|c51595_g1|c52721_g1|c52893_g2	231	0.00058	0.0413514
GO:0010214	seed coat development	8	c38031_g1|c38116_g1|c39764_g1|c50873_g2|c50873_g3|c51333_g1|c52109_g1|c52370_g4	44	0.00058	0.0413514
GO:0010311	lateral root formation	7	c23991_g1|c44263_g2|c44787_g1|c48118_g1|c48118_g2|c48118_g3|c48378_g1	34	0.00059	0.0418015
GO:0080167	response to karrikin	15	c35072_g1|c40029_g1|c41969_g1|c42459_g1|c43761_g2|c44736_g1|c44769_g1|c45828_g1|c46053_g2|c46053_g3|c46737_g1|c48933_g1|c49838_g1|c52396_g2|c7524_g1	130	0.0006	0.0421644
GO:0010417	glucuronoxylan biosynthetic process	6	c23187_g1|c40575_g1|c42804_g1|c43061_g2|c47970_g1|c50311_g3	25	0.00061	0.0421644
GO:0010413	glucuronoxylan metabolic process	6	c23187_g1|c40575_g1|c42804_g1|c43061_g2|c47970_g1|c50311_g3	25	0.00061	0.0421644
GO:0009250	glucan biosynthetic process	19	c34574_g3|c36546_g1|c37781_g1|c39956_g2|c40737_g1|c41197_g1|c44313_g1|c44313_g2|c44313_g3|c44678_g1|c45511_g2|c45511_g3|c48919_g1|c48919_g2|c48919_g4|c52324_g2|c52389_g1|c52679_g3|c52837_g1	187	0.00061	0.0421644
GO:0009819	drought recovery	4	c40029_g1|c45828_g1|c46053_g2|c46053_g3	10	0.00063	0.0432829
GO:0010286	heat acclimation	10	c35359_g1|c37490_g1|c37788_g1|c38122_g1|c38380_g1|c40443_g2|c42444_g1|c48907_g4|c49440_g1|c50801_g2	67	0.00065	0.044388
GO:0070592	cell wall polysaccharide biosynthetic process	8	c23187_g1|c40575_g1|c42804_g1|c43061_g2|c47970_g1|c50311_g3|c51002_g1|c51771_g1	45	0.00068	0.0458838
GO:0051445	regulation of meiotic cell cycle	8	c36353_g1|c37740_g1|c39375_g2|c46833_g1|c47817_g1|c50499_g1|c52197_g1|c52197_g3	45	0.00068	0.0458838
GO:0009404	toxin metabolic process	11	c29023_g2|c30478_g1|c32213_g1|c32213_g2|c35072_g1|c38463_g1|c39027_g1|c40277_g2|c43243_g1|c43243_g2|c45033_g1	80	0.00073	0.0489662
GO:0055044	symplast	109	c13970_g1|c24994_g1|c25250_g1|c28255_g1|c30478_g1|c31016_g1|c31961_g1|c32216_g1|c32216_g2|c32534_g1|c33472_g1|c33819_g2|c34000_g1|c34026_g2|c34257_g1|c34574_g3|c35359_g1|c36359_g1|c37788_g1|c37838_g1|c37888_g1|c38008_g1|c38041_g1|c38380_g1|c38417_g1|c39489_g1|c39570_g1|c39721_g1|c39959_g1|c40150_g2|c40150_g3|c40154_g1|c40443_g2|c40498_g1|c40523_g1|c40804_g1|c40804_g2|c40986_g1|c41782_g2|c42444_g1…	916	3.4e-19	2.5313e-16
GO:0009506	plasmodesma	109	c13970_g1|c24994_g1|c25250_g1|c28255_g1|c30478_g1|c31016_g1|c31961_g1|c32216_g1|c32216_g2|c32534_g1|c33472_g1|c33819_g2|c34000_g1|c34026_g2|c34257_g1|c34574_g3|c35359_g1|c36359_g1|c37788_g1|c37838_g1|c37888_g1|c38008_g1|c38041_g1|c38380_g1|c38417_g1|c39489_g1|c39570_g1|c39721_g1|c39959_g1|c40150_g2|c40150_g3|c40154_g1|c40443_g2|c40498_g1|c40523_g1|c40804_g1|c40804_g2|c40986_g1|c41782_g2|c42444_g1…	916	3.4e-19	2.5313e-16
GO:0005911	cell-cell junction	110	c13970_g1|c24994_g1|c25250_g1|c28255_g1|c30478_g1|c31016_g1|c31961_g1|c32216_g1|c32216_g2|c32534_g1|c33472_g1|c33819_g2|c34000_g1|c34026_g2|c34257_g1|c34574_g3|c35359_g1|c36359_g1|c37788_g1|c37838_g1|c37888_g1|c38008_g1|c38041_g1|c38380_g1|c38417_g1|c39489_g1|c39570_g1|c39721_g1|c39959_g1|c40150_g2|c40150_g3|c40154_g1|c40443_g2|c40498_g1|c40523_g1|c40804_g1|c40804_g2|c40986_g1|c41782_g2|c42444_g1…	1096	4.1e-14	2.03497e-11
GO:0005618	cell wall	97	c1308_g1|c18971_g1|c24994_g1|c25250_g1|c30478_g1|c30993_g1|c31110_g1|c31671_g1|c32938_g1|c34921_g1|c35599_g1|c36359_g1|c37262_g1|c37755_g1|c38008_g1|c38031_g1|c38116_g1|c38417_g1|c39143_g1|c39249_g1|c39351_g1|c39455_g1|c39764_g1|c39959_g1|c40150_g2|c40150_g3|c40207_g2|c40308_g1|c40498_g1|c40523_g1|c40547_g1|c40825_g1|c41242_g1|c41382_g1|c41575_g1|c42320_g1|c42320_g2|c42766_g1|c42875_g2|c43595_g1|…	973	2e-12	7.445e-10
GO:0031225	anchored component of membrane	44	c18971_g1|c31638_g1|c33797_g1|c35907_g1|c35907_g2|c36509_g1|c36868_g1|c36925_g1|c37208_g1|c39249_g1|c40804_g1|c40804_g2|c41517_g1|c41829_g1|c42041_g2|c43065_g2|c43366_g2|c43663_g1|c43742_g1|c43953_g1|c44060_g3|c44546_g1|c44576_g1|c44697_g1|c45277_g1|c45324_g1|c45631_g1|c45769_g3|c45877_g1|c45877_g2|c46149_g1|c47426_g2|c48129_g1|c48442_g1|c48814_g2|c48874_g1|c48875_g1|c49607_g2|c49691_g1|c50175_g2…	283	2.5e-12	7.445e-10
GO:0009505	plant-type cell wall	34	c18971_g1|c38031_g1|c38116_g1|c39249_g1|c39764_g1|c40150_g2|c40150_g3|c40308_g1|c40498_g1|c40523_g1|c43953_g1|c44485_g1|c45037_g1|c45631_g1|c45873_g3|c45873_g4|c46737_g1|c47426_g2|c48129_g1|c48193_g1|c48438_g1|c49262_g5|c49375_g1|c49607_g2|c50873_g2|c50873_g3|c51260_g1|c51260_g2|c51333_g1|c51768_g1|c52336_g1|c52623_g1|c52809_g1|c52809_g2	220	8.9e-10	2.20868e-07
GO:0046658	anchored component of plasma membrane	29	c18971_g1|c31638_g1|c33797_g1|c35907_g1|c35907_g2|c36868_g1|c37208_g1|c39249_g1|c40804_g1|c40804_g2|c41829_g1|c42041_g2|c43366_g2|c43663_g1|c43742_g1|c44060_g3|c44576_g1|c44697_g1|c45277_g1|c45769_g3|c46149_g1|c48129_g1|c48874_g1|c49607_g2|c49691_g1|c50175_g2|c50210_g1|c50427_g1|c52623_g1	173	2.2e-09	4.67971e-07
GO:0030054	cell junction	112	c13970_g1|c24994_g1|c25250_g1|c28255_g1|c30478_g1|c31016_g1|c31961_g1|c32216_g1|c32216_g2|c32534_g1|c33472_g1|c33819_g2|c34000_g1|c34026_g2|c34257_g1|c34574_g3|c35359_g1|c36359_g1|c37788_g1|c37838_g1|c37888_g1|c38008_g1|c38041_g1|c38380_g1|c38417_g1|c39489_g1|c39570_g1|c39721_g1|c39959_g1|c40150_g2|c40150_g3|c40154_g1|c40443_g2|c40498_g1|c40523_g1|c40804_g1|c40804_g2|c40986_g1|c41782_g2|c42444_g1…	1357	4e-09	7.445e-07
GO:0048046	apoplast	53	c30993_g1|c32938_g1|c35479_g1|c35599_g1|c35654_g1|c35820_g1|c36804_g1|c38029_g1|c38031_g1|c38116_g1|c39143_g1|c39351_g1|c39489_g1|c39500_g1|c39764_g1|c39959_g1|c40286_g1|c40986_g1|c41061_g3|c41382_g1|c41382_g2|c41782_g2|c42064_g1|c42547_g1|c42875_g2|c43152_g1|c43152_g2|c43953_g1|c44571_g1|c44688_g1|c44715_g1|c44736_g1|c45077_g1|c45217_g1|c45503_g1|c45631_g1|c45675_g1|c46114_g1|c46209_g1|c46713_g2…	511	5.9e-08	9.76122e-06
GO:0009524	phragmoplast	18	c20307_g1|c29246_g1|c31961_g1|c34257_g1|c36212_g1|c36701_g2|c38432_g1|c45208_g1|c45821_g1|c47323_g1|c48272_g1|c49251_g1|c50040_g1|c50674_g1|c50674_g2|c50934_g4|c52836_g1|c52963_g2	94	3.1e-07	4.6159e-05
GO:0030312	external encapsulating structure	98	c1308_g1|c18971_g1|c24994_g1|c25250_g1|c30478_g1|c30993_g1|c31110_g1|c31671_g1|c32938_g1|c34921_g1|c35599_g1|c36359_g1|c37262_g1|c37755_g1|c38008_g1|c38031_g1|c38116_g1|c38417_g1|c39143_g1|c39249_g1|c39351_g1|c39455_g1|c39764_g1|c39959_g1|c40150_g2|c40150_g3|c40207_g2|c40308_g1|c40498_g1|c40523_g1|c40547_g1|c40825_g1|c41242_g1|c41382_g1|c41575_g1|c42320_g1|c42320_g2|c42766_g1|c42875_g2|c43595_g1|…	1309	3.1e-06	0.000419627
GO:0005576	extracellular region	166	c1308_g1|c22565_g1|c30707_g1|c30993_g1|c31638_g1|c31671_g1|c31702_g1|c32938_g1|c34520_g2|c34740_g1|c34921_g1|c35479_g1|c35599_g1|c35654_g1|c35697_g2|c35699_g1|c35820_g1|c35929_g1|c35991_g1|c36006_g1|c36084_g1|c36804_g1|c37039_g1|c37151_g1|c37277_g1|c37645_g1|c37710_g1|c37710_g2|c37755_g1|c38029_g1|c38031_g1|c38116_g1|c38417_g1|c39143_g1|c39249_g1|c39351_g1|c39455_g1|c39461_g1|c39489_g1|c39500_g1|…	2529	5e-06	0.000620417
GO:0005773	vacuole	113	c10966_g1|c30478_g1|c31016_g1|c31110_g1|c31434_g1|c31746_g1|c31961_g1|c32534_g1|c32938_g1|c33472_g1|c35476_g1|c35635_g2|c36868_g1|c37197_g1|c37262_g1|c37755_g1|c38250_g1|c38417_g1|c38526_g1|c38731_g1|c39407_g1|c39621_g1|c40067_g1|c40201_g1|c40440_g1|c40498_g1|c40573_g2|c40986_g1|c41242_g1|c41250_g2|c41487_g2|c41545_g1|c41782_g2|c41969_g1|c42000_g1|c42218_g1|c42287_g2|c42547_g1|c42807_g1|c42942_g1…	1611	1.1e-05	0.00125992
GO:0005634	nucleus	578	c11531_g1|c17117_g1|c19690_g1|c22578_g1|c23991_g1|c25202_g2|c25250_g1|c26255_g1|c26439_g1|c27810_g1|c27866_g1|c28227_g1|c28425_g2|c28590_g1|c29209_g1|c29246_g1|c29727_g1|c30497_g1|c31037_g1|c31203_g1|c31231_g1|c31466_g1|c31513_g1|c31529_g1|c31547_g1|c31685_g1|c31828_g1|c31855_g1|c32267_g1|c32655_g1|c33008_g1|c33191_g1|c33357_g1|c33368_g1|c33384_g1|c33522_g1|c33742_g1|c33885_g1|c34028_g1|c34039_g1…	10844	5.9e-05	0.00627507
GO:0009536	plastid	156	c20316_g1|c21657_g1|c23843_g1|c26060_g1|c27866_g1|c28807_g1|c30497_g1|c31110_g1|c31521_g1|c31961_g1|c3200_g1|c33819_g2|c34364_g1|c34377_g1|c34778_g1|c35072_g1|c35278_g1|c35479_g1|c35818_g1|c36100_g1|c37197_g1|c37262_g1|c37343_g1|c37443_g1|c37710_g1|c37710_g2|c37976_g1|c38008_g1|c38283_g1|c38302_g2|c38432_g1|c38463_g1|c38731_g1|c39540_g2|c39561_g1|c39561_g2|c40234_g1|c40286_g1|c40326_g1|c40510_g1|…	2519	0.00018	0.017868
GO:0009507	chloroplast	148	c20316_g1|c21657_g1|c23843_g1|c26060_g1|c27866_g1|c28807_g1|c30497_g1|c31110_g1|c31521_g1|c31961_g1|c3200_g1|c33819_g2|c34364_g1|c34377_g1|c34778_g1|c35072_g1|c35278_g1|c35479_g1|c35818_g1|c36100_g1|c37197_g1|c37262_g1|c37343_g1|c37443_g1|c37710_g1|c37710_g2|c37976_g1|c38008_g1|c38283_g1|c38302_g2|c38432_g1|c38463_g1|c38731_g1|c39540_g2|c39561_g1|c39561_g2|c40234_g1|c40286_g1|c40326_g1|c40510_g1|…	2411	0.00039	0.0362944
GO:0000148	1,3-beta-D-glucan synthase complex	7	c34574_g3|c36546_g1|c40737_g1|c41197_g1|c45511_g2|c45511_g3|c52837_g1	31	0.00047	0.0411665
GO:0003700	transcription factor activity, sequence-specific DNA binding	216	c17122_g1|c19690_g1|c23991_g1|c27810_g1|c28425_g2|c28590_g1|c29209_g1|c31037_g1|c31466_g1|c32267_g1|c33368_g1|c33522_g1|c34028_g1|c34831_g2|c35112_g1|c35453_g1|c36009_g1|c36162_g1|c36353_g1|c36558_g1|c36953_g1|c37159_g1|c37296_g1|c37343_g1|c37361_g2|c37368_g1|c37398_g1|c37464_g1|c37576_g1|c37662_g2|c37740_g1|c37838_g1|c37879_g2|c38038_g1|c38122_g1|c38128_g1|c38431_g1|c38521_g4|c38531_g2|c38829_g1…	2530	1.8e-21	3.9482e-18
GO:0001071	nucleic acid binding transcription factor activity	216	c17122_g1|c19690_g1|c23991_g1|c27810_g1|c28425_g2|c28590_g1|c29209_g1|c31037_g1|c31466_g1|c32267_g1|c33368_g1|c33522_g1|c34028_g1|c34831_g2|c35112_g1|c35453_g1|c36009_g1|c36162_g1|c36353_g1|c36558_g1|c36953_g1|c37159_g1|c37296_g1|c37343_g1|c37361_g2|c37368_g1|c37398_g1|c37464_g1|c37576_g1|c37662_g2|c37740_g1|c37838_g1|c37879_g2|c38038_g1|c38122_g1|c38128_g1|c38431_g1|c38521_g4|c38531_g2|c38829_g1…	2531	1.9e-21	3.9482e-18
GO:0004674	protein serine/threonine kinase activity	130	c17620_g1|c20406_g1|c23194_g1|c23706_g1|c24994_g1|c28255_g1|c31042_g1|c31713_g1|c33130_g1|c33424_g1|c34022_g1|c34026_g2|c35738_g1|c35820_g1|c36212_g1|c36334_g1|c36517_g1|c36517_g2|c36728_g1|c37340_g1|c37343_g1|c37783_g1|c37888_g1|c38644_g2|c38659_g1|c38659_g2|c38898_g1|c39397_g2|c39750_g1|c40154_g1|c40460_g1|c40547_g1|c40625_g1|c41017_g1|c41218_g1|c41575_g1|c41642_g1|c42048_g1|c42183_g1|c42994_g1…	1461	1.8e-14	2.4936e-11
GO:0016773	phosphotransferase activity, alcohol group as acceptor	167	c17620_g1|c20406_g1|c23194_g1|c23706_g1|c24994_g1|c27015_g2|c28255_g1|c31016_g1|c31042_g1|c31713_g1|c33130_g1|c33424_g1|c34022_g1|c34026_g2|c35228_g1|c35738_g1|c35820_g1|c36124_g1|c36212_g1|c36334_g1|c36517_g1|c36517_g2|c36728_g1|c37041_g1|c37340_g1|c37343_g1|c37783_g1|c37888_g1|c37914_g1|c38356_g1|c38644_g2|c38659_g1|c38659_g2|c38898_g1|c39397_g2|c39750_g1|c40154_g1|c40210_g1|c40413_g1|c40460_g1…	2240	1.3e-11	1.2468e-08
GO:0004672	protein kinase activity	145	c17620_g1|c20406_g1|c23194_g1|c23706_g1|c24994_g1|c27015_g2|c28255_g1|c31016_g1|c31042_g1|c31713_g1|c33130_g1|c33424_g1|c34022_g1|c34026_g2|c35738_g1|c35820_g1|c36212_g1|c36334_g1|c36517_g1|c36517_g2|c36728_g1|c37340_g1|c37343_g1|c37783_g1|c37888_g1|c38644_g2|c38659_g1|c38659_g2|c38898_g1|c39397_g2|c39750_g1|c40154_g1|c40413_g1|c40460_g1|c40547_g1|c40625_g1|c41017_g1|c41218_g1|c41575_g1|c41642_g1…	1861	1.5e-11	1.2468e-08
GO:0003677	DNA binding	308	c19690_g1|c23991_g1|c27810_g1|c28425_g2|c29209_g1|c31466_g1|c31513_g1|c31547_g1|c31685_g1|c32267_g1|c33357_g1|c33368_g1|c33522_g1|c33742_g1|c34028_g1|c34831_g2|c35027_g1|c35045_g1|c35112_g1|c35453_g1|c35719_g1|c35961_g1|c36009_g1|c36093_g1|c36353_g1|c36440_g2|c36558_g1|c36953_g1|c36961_g1|c37159_g1|c37296_g1|c37343_g1|c37361_g2|c37368_g1|c37398_g1|c37464_g1|c37576_g1|c37662_g2|c37740_g1|c37838_g1…	5069	1e-09	6.53086e-07
GO:0016301	kinase activity	171	c17620_g1|c20406_g1|c23194_g1|c23706_g1|c24994_g1|c27015_g2|c28255_g1|c31016_g1|c31042_g1|c31713_g1|c3200_g1|c33130_g1|c33424_g1|c34022_g1|c34026_g2|c35228_g1|c35738_g1|c35820_g1|c36124_g1|c36212_g1|c36334_g1|c36517_g1|c36517_g2|c36728_g1|c37041_g1|c37340_g1|c37343_g1|c37783_g1|c37888_g1|c38356_g1|c38644_g2|c38659_g1|c38659_g2|c38827_g1|c38898_g1|c39397_g2|c39750_g1|c40154_g1|c40210_g1|c40413_g1|…	2447	1.1e-09	6.53086e-07
GO:0004553	hydrolase activity, hydrolyzing O-glycosyl compounds	60	c29078_g2|c30993_g1|c35599_g1|c35991_g1|c37710_g1|c37710_g2|c38526_g1|c39249_g1|c39351_g1|c40141_g1|c40825_g1|c41382_g1|c41382_g2|c41543_g1|c41769_g3|c41911_g2|c42323_g1|c42466_g1|c42766_g1|c43065_g2|c43352_g2|c43742_g1|c44571_g1|c44972_g1|c45141_g1|c46114_g1|c46576_g1|c46576_g2|c46880_g1|c47270_g1|c47530_g2|c48094_g2|c48129_g1|c48438_g1|c49262_g3|c49262_g5|c49586_g1|c49812_g1|c50359_g1|c50755_g1…	602	4e-09	2.078e-06
GO:0016798	hydrolase activity, acting on glycosyl bonds	66	c29078_g2|c30993_g1|c35599_g1|c35991_g1|c37710_g1|c37710_g2|c37755_g1|c38526_g1|c38631_g2|c39249_g1|c39351_g1|c40141_g1|c40825_g1|c41242_g1|c41382_g1|c41382_g2|c41543_g1|c41769_g3|c41911_g2|c42323_g1|c42466_g1|c42766_g1|c43065_g2|c43352_g2|c43600_g1|c43742_g1|c44571_g1|c44972_g1|c45141_g1|c46114_g1|c46576_g1|c46576_g2|c46880_g1|c46904_g1|c47059_g1|c47270_g1|c47530_g2|c48094_g2|c48129_g1|c48438_g1…	701	6.6e-09	3.04773e-06
GO:0003680	AT DNA binding	11	c40752_g2|c40990_g1|c44138_g2|c45040_g1|c46540_g2|c46540_g3|c49315_g1|c49315_g2|c50680_g2|c55446_g1|c64005_g1	31	4.3e-08	1.78708e-05
GO:0003777	microtubule motor activity	23	c38432_g1|c40902_g1|c42723_g1|c43856_g1|c44422_g1|c44551_g2|c45208_g1|c45821_g1|c47417_g1|c48272_g1|c49251_g1|c50594_g1|c50674_g1|c50674_g2|c51184_g1|c51276_g1|c51866_g1|c52454_g2|c52467_g1|c52500_g1|c52528_g1|c52552_g2|c52673_g1	143	7.4e-08	2.79585e-05
GO:0016772	transferase activity, transferring phosphorus-containing groups	216	c16523_g2|c17620_g1|c20406_g1|c23194_g1|c23706_g1|c24994_g1|c27015_g2|c28255_g1|c28537_g2|c28807_g1|c31016_g1|c31042_g1|c31232_g1|c31713_g1|c3200_g1|c33130_g1|c33424_g1|c33885_g1|c34022_g1|c34026_g2|c34422_g2|c35228_g1|c35738_g1|c35820_g1|c36124_g1|c36212_g1|c36334_g1|c36517_g1|c36517_g2|c36728_g1|c37041_g1|c37340_g1|c37343_g1|c37783_g1|c37888_g1|c37914_g1|c38356_g1|c38644_g2|c38659_g1|c38659_g2|…	3552	5.2e-07	0.000180093
GO:0045543	gibberellin 2-beta-dioxygenase activity	5	c39690_g1|c40823_g1|c40823_g2|c45507_g1|c46838_g1	7	3.2e-06	0.00102302
GO:0052635	C-20 gibberellin 2-beta-dioxygenase activity	4	c39690_g1|c40823_g1|c40823_g2|c46838_g1	4	3.7e-06	0.00109837
GO:0003774	motor activity	28	c38432_g1|c40902_g1|c42723_g1|c43856_g1|c44422_g1|c44551_g2|c45208_g1|c45821_g1|c47176_g1|c47176_g2|c47184_g7|c47417_g1|c48272_g1|c49251_g1|c50594_g1|c50674_g1|c50674_g2|c51184_g1|c51276_g1|c51866_g1|c51946_g2|c52454_g2|c52467_g1|c52500_g1|c52528_g1|c52552_g2|c52673_g1|c52680_g1	266	2e-05	0.00554133
GO:0016174	NAD(P)H oxidase activity	6	c30804_g1|c30804_g2|c50502_g5|c51114_g1|c51400_g3|c75359_g1	15	2.5e-05	0.00649375
GO:0043565	sequence-specific DNA binding	68	c19690_g1|c28425_g2|c37343_g1|c37361_g2|c37464_g1|c37576_g1|c37662_g2|c38128_g1|c38906_g2|c39443_g1|c40752_g2|c40990_g1|c41148_g1|c41148_g2|c42134_g1|c42268_g1|c42286_g1|c42459_g1|c42921_g1|c43018_g1|c43165_g2|c43642_g1|c43998_g1|c44035_g2|c44138_g2|c44825_g1|c45040_g1|c45654_g3|c45806_g1|c46027_g1|c46540_g2|c46540_g3|c46935_g1|c47225_g1|c47246_g1|c47280_g1|c47536_g1|c47545_g1|c47575_g3|c47949_g1…	931	3.5e-05	0.00855647
GO:0004566	beta-glucuronidase activity	4	c49262_g3|c49262_g5|c50755_g1|c51768_g1	6	5.2e-05	0.0113743
GO:0008569	ATP-dependent microtubule motor activity, minus-end-directed	4	c45821_g1|c50674_g1|c50674_g2|c51184_g1	6	5.2e-05	0.0113743
GO:0003682	chromatin binding	52	c31685_g1|c33357_g1|c33368_g1|c33742_g1|c34479_g1|c35027_g1|c35961_g1|c36093_g1|c36558_g1|c37464_g1|c39162_g1|c41297_g1|c41297_g2|c41507_g1|c41507_g2|c41939_g1|c42063_g2|c42203_g1|c42730_g1|c43555_g1|c43968_g1|c43998_g1|c44051_g1|c44055_g1|c44610_g1|c44654_g1|c45389_g2|c45713_g2|c46151_g4|c46151_g5|c46383_g1|c46383_g5|c46528_g5|c46598_g1|c48220_g2|c48548_g3|c48633_g2|c48867_g1|c49009_g3|c49046_g3…	669	6e-05	0.012468
GO:0004565	beta-galactosidase activity	10	c41382_g1|c41382_g2|c41543_g1|c41911_g2|c44571_g1|c48438_g1|c52109_g1|c52809_g1|c52809_g2|c52947_g1	52	7.7e-05	0.0152387
GO:0015925	galactosidase activity	12	c41382_g1|c41382_g2|c41543_g1|c41911_g2|c44571_g1|c48438_g1|c51246_g1|c52109_g1|c52396_g2|c52809_g1|c52809_g2|c52947_g1	76	0.00011	0.02078
GO:0071991	phytochelatin transporter activity	4	c52306_g2|c52555_g1|c52555_g2|c52555_g4	7	0.00012	0.02078
GO:0071992	phytochelatin transmembrane transporter activity	4	c52306_g2|c52555_g1|c52555_g2|c52555_g4	7	0.00012	0.02078
GO:0008559	xenobiotic-transporting ATPase activity	7	c35635_g2|c41782_g2|c44432_g1|c49072_g2|c52555_g1|c52555_g2|c52555_g4	27	0.00013	0.0216112

## Sheet: L3-L1
GO_ID	Term	DGs number	DGs	Annotated genes	P value	FDR
GO:0009755	hormone-mediated signaling pathway	86	c26255_g1|c27217_g1|c27810_g1|c31703_g1|c32760_g3|c33679_g2|c35748_g1|c37222_g1|c37410_g1|c37525_g1|c37918_g1|c38906_g2|c39094_g1|c39433_g1|c39838_g1|c40363_g1|c40460_g1|c41265_g1|c41950_g1|c42009_g1|c42160_g1|c42177_g1|c42294_g2|c42428_g1|c42504_g2|c43165_g2|c43460_g1|c44124_g1|c44174_g1|c44263_g2|c44332_g1|c44332_g2|c44799_g1|c45055_g1|c45177_g1|c45225_g1|c45681_g1|c45818_g1|c45895_g1|c46167_g1…	922	4.1e-21	4.64776e-17
GO:1901700	response to oxygen-containing compound	148	c23159_g1|c23416_g1|c25259_g2|c26255_g1|c27810_g1|c30518_g1|c31703_g1|c33679_g2|c34444_g1|c34498_g1|c34634_g1|c34881_g1|c35072_g1|c35072_g2|c35631_g1|c35720_g1|c35748_g1|c35850_g2|c36542_g1|c36890_g3|c37073_g1|c37119_g1|c37222_g1|c37490_g1|c37879_g1|c37879_g3|c38153_g1|c38153_g2|c38306_g1|c38489_g1|c38819_g1|c38906_g2|c39245_g1|c39692_g1|c39765_g1|c39838_g1|c40122_g1|c40144_g1|c40244_g1|c40363_g1…	2279	6.2e-20	3.51416e-16
GO:0001101	response to acid chemical	101	c23416_g1|c26255_g1|c27810_g1|c31703_g1|c33679_g2|c34444_g1|c34634_g1|c34881_g1|c35072_g1|c35072_g2|c35850_g2|c36542_g1|c36890_g3|c37119_g1|c37222_g1|c37879_g1|c37879_g3|c38306_g1|c38489_g1|c38819_g1|c38906_g2|c39245_g1|c39765_g1|c39838_g1|c40244_g1|c40363_g1|c40389_g2|c41642_g1|c41771_g1|c41942_g1|c41950_g1|c42009_g1|c42177_g1|c42203_g1|c42427_g1|c42427_g2|c42427_g3|c42428_g1|c42469_g2|c42875_g2…	1284	3e-19	1.1336e-15
GO:0009725	response to hormone	127	c23416_g1|c26255_g1|c27217_g1|c27810_g1|c31703_g1|c32760_g3|c33679_g2|c34444_g1|c34634_g1|c34881_g1|c35072_g1|c35072_g2|c35748_g1|c35850_g2|c36542_g1|c36890_g3|c37222_g1|c37410_g1|c37525_g1|c37918_g1|c38306_g1|c38489_g1|c38819_g1|c38906_g2|c39094_g1|c39433_g1|c39838_g1|c40363_g1|c40389_g2|c40460_g1|c41265_g1|c41771_g1|c41942_g1|c41950_g1|c42009_g1|c42160_g1|c42177_g1|c42294_g2|c42427_g1|c42427_g2…	1881	1.8e-18	5.1012e-15
GO:0098542	defense response to other organism	66	c23416_g1|c24994_g1|c32938_g1|c35336_g1|c35421_g1|c35850_g2|c36868_g1|c37172_g1|c38020_g1|c38906_g2|c39489_g1|c39838_g1|c40049_g2|c40075_g2|c40277_g1|c40277_g2|c40491_g1|c40491_g2|c40986_g1|c41451_g1|c41685_g1|c42193_g1|c42277_g1|c42378_g1|c43165_g2|c43359_g1|c43365_g1|c43365_g2|c44191_g1|c44191_g2|c44336_g1|c44782_g1|c45225_g1|c45313_g1|c45313_g3|c45522_g1|c45675_g1|c46575_g1|c46883_g1|c47028_g1…	717	3.6e-16	8.16192e-13
GO:0032870	cellular response to hormone stimulus	88	c26255_g1|c27217_g1|c27810_g1|c31703_g1|c32760_g3|c33679_g2|c34444_g1|c35748_g1|c37222_g1|c37410_g1|c37525_g1|c37918_g1|c38906_g2|c39094_g1|c39433_g1|c39838_g1|c40363_g1|c40460_g1|c41265_g1|c41950_g1|c42009_g1|c42160_g1|c42177_g1|c42294_g2|c42428_g1|c42504_g2|c43048_g1|c43165_g2|c43460_g1|c44124_g1|c44174_g1|c44263_g2|c44332_g1|c44332_g2|c44799_g1|c45055_g1|c45177_g1|c45225_g1|c45681_g1|c45818_g1…	1184	2e-15	3.77867e-12
GO:0006950	response to stress	277	c15702_g1|c16523_g1|c16523_g2|c19633_g1|c23159_g1|c23416_g1|c24994_g1|c25259_g2|c27045_g2|c27810_g1|c30518_g1|c31703_g1|c31896_g1|c32201_g1|c32931_g1|c32938_g1|c34364_g1|c34377_g1|c34401_g1|c34444_g1|c34498_g1|c34634_g1|c34881_g1|c34884_g1|c34946_g2|c35072_g1|c35072_g2|c35236_g1|c35336_g1|c35421_g1|c35621_g1|c35631_g1|c35720_g1|c35761_g1|c35850_g2|c36353_g1|c36593_g1|c36868_g1|c36890_g3|c37073_g1…	6115	1.2e-14	1.94331e-11
GO:0009266	response to temperature stimulus	67	c30518_g1|c31703_g1|c32931_g1|c34881_g1|c34946_g2|c35631_g1|c36890_g3|c37490_g1|c37788_g1|c38122_g1|c38153_g1|c38153_g2|c38306_g1|c38819_g1|c39019_g1|c39765_g1|c39765_g2|c40443_g1|c40443_g2|c40538_g1|c41019_g1|c41950_g1|c42277_g1|c42346_g1|c42546_g1|c42719_g1|c42875_g2|c42915_g1|c43359_g1|c43460_g1|c43508_g2|c44124_g1|c44516_g1|c44736_g1|c44808_g1|c44870_g1|c44870_g2|c45475_g2|c45601_g1|c46104_g2…	801	2.3e-14	3.2591e-11
GO:0010035	response to inorganic substance	96	c16523_g1|c16523_g2|c25259_g2|c27810_g1|c30518_g1|c31703_g1|c32938_g1|c34498_g1|c34881_g1|c35072_g1|c35072_g2|c35214_g2|c35631_g1|c36890_g3|c37119_g1|c37172_g1|c37490_g1|c37689_g1|c37879_g1|c37879_g3|c37883_g1|c38153_g1|c38153_g2|c39154_g1|c39245_g1|c39489_g1|c39765_g1|c39936_g1|c39936_g2|c40122_g1|c40491_g1|c40491_g2|c40750_g1|c41212_g1|c41950_g1|c42277_g1|c42346_g1|c42875_g2|c42915_g1|c43048_g1…	1415	2.8e-14	3.52676e-11
GO:0051707	response to other organism	87	c23416_g1|c24994_g1|c29022_g1|c32938_g1|c34000_g1|c35336_g1|c35421_g1|c35850_g2|c36542_g1|c36868_g1|c37073_g1|c37172_g1|c38020_g1|c38906_g2|c39489_g1|c39686_g1|c39838_g1|c40049_g2|c40075_g2|c40277_g1|c40277_g2|c40491_g1|c40491_g2|c40986_g1|c41451_g1|c41685_g1|c41942_g1|c41969_g1|c42011_g1|c42119_g1|c42193_g1|c42277_g1|c42378_g1|c42989_g1|c43165_g2|c43359_g1|c43360_g1|c43365_g1|c43365_g2|c44191_g1…	1224	3.8e-14	4.30768e-11
GO:0043207	response to external biotic stimulus	87	c23416_g1|c24994_g1|c29022_g1|c32938_g1|c34000_g1|c35336_g1|c35421_g1|c35850_g2|c36542_g1|c36868_g1|c37073_g1|c37172_g1|c38020_g1|c38906_g2|c39489_g1|c39686_g1|c39838_g1|c40049_g2|c40075_g2|c40277_g1|c40277_g2|c40491_g1|c40491_g2|c40986_g1|c41451_g1|c41685_g1|c41942_g1|c41969_g1|c42011_g1|c42119_g1|c42193_g1|c42277_g1|c42378_g1|c42989_g1|c43165_g2|c43359_g1|c43360_g1|c43365_g1|c43365_g2|c44191_g1…	1226	4.2e-14	4.32829e-11
GO:0006952	defense response	101	c15702_g1|c19633_g1|c23159_g1|c23416_g1|c24994_g1|c32201_g1|c32938_g1|c34401_g1|c35236_g1|c35336_g1|c35421_g1|c35621_g1|c35850_g2|c36868_g1|c37172_g1|c38020_g1|c38306_g1|c38489_g1|c38906_g2|c39245_g1|c39489_g1|c39838_g1|c40049_g2|c40075_g2|c40277_g1|c40277_g2|c40491_g1|c40491_g2|c40986_g1|c41451_g1|c41685_g1|c41771_g1|c41942_g1|c42193_g1|c42277_g1|c42378_g1|c42427_g1|c42427_g2|c42427_g3|c42875_g2…	1543	5.4e-14	5.1012e-11
GO:0009719	response to endogenous stimulus	132	c23159_g1|c23416_g1|c26255_g1|c27217_g1|c27810_g1|c31703_g1|c32760_g3|c33679_g2|c34444_g1|c34634_g1|c34881_g1|c35072_g1|c35072_g2|c35720_g1|c35748_g1|c35850_g2|c36542_g1|c36890_g3|c37222_g1|c37410_g1|c37525_g1|c37918_g1|c38306_g1|c38489_g1|c38819_g1|c38906_g2|c39094_g1|c39433_g1|c39692_g1|c39838_g1|c40363_g1|c40389_g2|c40460_g1|c41265_g1|c41771_g1|c41942_g1|c41950_g1|c42009_g1|c42160_g1|c42177_g1…	2285	7.1e-14	6.1912e-11
GO:0009607	response to biotic stimulus	90	c23416_g1|c24994_g1|c29022_g1|c32938_g1|c34000_g1|c35336_g1|c35421_g1|c35850_g2|c36542_g1|c36868_g1|c37073_g1|c37172_g1|c38020_g1|c38906_g2|c39489_g1|c39686_g1|c39838_g1|c40049_g2|c40075_g2|c40277_g1|c40277_g2|c40491_g1|c40491_g2|c40986_g1|c41451_g1|c41685_g1|c41942_g1|c41969_g1|c42011_g1|c42119_g1|c42193_g1|c42277_g1|c42378_g1|c42989_g1|c43165_g2|c43359_g1|c43360_g1|c43365_g1|c43365_g2|c43819_g1…	1314	1.1e-13	8.90686e-11
GO:0009620	response to fungus	36	c24994_g1|c35421_g1|c36868_g1|c37172_g1|c38906_g2|c39489_g1|c39686_g1|c40491_g1|c40491_g2|c40986_g1|c41451_g1|c41942_g1|c42193_g1|c42277_g1|c43165_g2|c43359_g1|c44191_g1|c44191_g2|c45370_g2|c45675_g1|c46048_g1|c46048_g2|c46575_g1|c46883_g1|c47536_g1|c47743_g1|c48213_g1|c49059_g2|c50081_g1|c50262_g1|c50510_g2|c50598_g1|c51044_g1|c51746_g1|c52006_g1|c52249_g1	303	1.5e-12	1.1336e-09
GO:0042542	response to hydrogen peroxide	35	c25259_g2|c30518_g1|c34498_g1|c35631_g1|c37490_g1|c38153_g1|c38153_g2|c40122_g1|c40491_g1|c40491_g2|c41212_g1|c42277_g1|c42346_g1|c42915_g1|c43274_g1|c43359_g1|c44183_g3|c45059_g1|c45059_g2|c45601_g1|c46080_g1|c46714_g1|c46883_g1|c47850_g1|c48058_g1|c48398_g1|c49280_g1|c49440_g1|c49550_g2|c49776_g2|c50081_g1|c51044_g1|c51439_g1|c52505_g3|c52954_g1	295	3.1e-12	2.19635e-09
GO:0042221	response to chemical	227	c16523_g1|c16523_g2|c23159_g1|c23416_g1|c25259_g2|c25519_g1|c26255_g1|c27217_g1|c27810_g1|c29023_g1|c30518_g1|c31703_g1|c32760_g3|c32938_g1|c33679_g2|c34444_g1|c34498_g1|c34634_g1|c34881_g1|c35072_g1|c35072_g2|c35214_g2|c35631_g1|c35720_g1|c35727_g1|c35748_g1|c35850_g2|c36542_g1|c36890_g3|c37073_g1|c37119_g1|c37172_g1|c37222_g1|c37410_g1|c37490_g1|c37525_g1|c37689_g1|c37879_g1|c37879_g3|c37883_g1…	5006	7e-12	4.66776e-09
GO:0071495	cellular response to endogenous stimulus	89	c26255_g1|c27217_g1|c27810_g1|c31703_g1|c32760_g3|c33679_g2|c34444_g1|c35720_g1|c35748_g1|c37222_g1|c37410_g1|c37525_g1|c37918_g1|c38906_g2|c39094_g1|c39433_g1|c39838_g1|c40363_g1|c40460_g1|c41265_g1|c41950_g1|c42009_g1|c42160_g1|c42177_g1|c42294_g2|c42428_g1|c42504_g2|c43048_g1|c43165_g2|c43460_g1|c44124_g1|c44174_g1|c44263_g2|c44332_g1|c44332_g2|c44799_g1|c45055_g1|c45177_g1|c45225_g1|c45681_g1…	1409	1.3e-11	7.75621e-09
GO:0009628	response to abiotic stimulus	139	c16523_g1|c16523_g2|c27217_g1|c27810_g1|c30518_g1|c31703_g1|c31896_g1|c32931_g1|c32938_g1|c34444_g1|c34551_g1|c34881_g1|c34884_g1|c34946_g2|c35072_g1|c35072_g2|c35631_g1|c36353_g1|c36542_g1|c36868_g1|c36890_g3|c37073_g1|c37119_g1|c37130_g1|c37490_g1|c37689_g1|c37788_g1|c37879_g1|c37879_g3|c38122_g1|c38153_g1|c38153_g2|c38306_g1|c38819_g1|c39019_g1|c39600_g1|c39765_g1|c39765_g2|c39936_g1|c39936_g2…	2638	1.3e-11	7.75621e-09
GO:0000302	response to reactive oxygen species	41	c25259_g2|c30518_g1|c34498_g1|c35631_g1|c37490_g1|c38153_g1|c38153_g2|c39245_g1|c40122_g1|c40491_g1|c40491_g2|c41212_g1|c42277_g1|c42346_g1|c42546_g1|c42915_g1|c43048_g1|c43274_g1|c43359_g1|c44183_g3|c44669_g1|c45059_g1|c45059_g2|c45601_g1|c45654_g1|c46080_g1|c46714_g1|c46883_g1|c47192_g1|c47850_g1|c48058_g1|c48398_g1|c49280_g1|c49440_g1|c49550_g2|c49776_g2|c50081_g1|c51044_g1|c51439_g1|c52505_g3…	427	4.2e-11	2.38056e-08
GO:0050832	defense response to fungus	30	c24994_g1|c35421_g1|c36868_g1|c37172_g1|c38906_g2|c39489_g1|c40491_g1|c40491_g2|c40986_g1|c41451_g1|c42193_g1|c42277_g1|c43165_g2|c43359_g1|c44191_g1|c44191_g2|c45675_g1|c46575_g1|c46883_g1|c47536_g1|c47743_g1|c48213_g1|c49059_g2|c50081_g1|c50262_g1|c50510_g2|c50598_g1|c51044_g1|c51746_g1|c52006_g1	249	7.5e-11	4.04857e-08
GO:0009753	response to jasmonic acid	27	c34634_g1|c35850_g2|c38489_g1|c38819_g1|c38906_g2|c39838_g1|c41942_g1|c42427_g1|c42427_g2|c42427_g3|c42469_g2|c43042_g1|c43042_g2|c43165_g2|c45225_g1|c45389_g2|c46167_g1|c46528_g2|c46575_g1|c47192_g1|c47290_g2|c47536_g1|c48444_g2|c51988_g1|c52001_g4|c52954_g1|c74495_g1	213	2.1e-10	1.08207e-07
GO:0006979	response to oxidative stress	60	c25259_g2|c30518_g1|c34377_g1|c34498_g1|c35631_g1|c35761_g1|c36868_g1|c36890_g3|c37172_g1|c37490_g1|c38153_g1|c38153_g2|c39245_g1|c39489_g1|c40122_g1|c40491_g1|c40491_g2|c41212_g1|c42277_g1|c42346_g1|c42546_g1|c42915_g1|c43048_g1|c43274_g1|c43359_g1|c43517_g1|c43953_g1|c44183_g3|c44279_g1|c44292_g1|c44669_g1|c44814_g1|c45059_g1|c45059_g2|c45601_g1|c45654_g1|c45828_g2|c46080_g1|c46714_g1|c46883_g1…	837	2.9e-10	1.42932e-07
GO:0009408	response to heat	37	c30518_g1|c32931_g1|c34946_g2|c35631_g1|c37490_g1|c37788_g1|c38122_g1|c38153_g1|c38153_g2|c40443_g1|c40443_g2|c40538_g1|c42277_g1|c42546_g1|c42719_g1|c42915_g1|c43359_g1|c44124_g1|c44516_g1|c44736_g1|c45475_g2|c45601_g1|c46167_g1|c46968_g2|c47323_g2|c48058_g1|c48072_g2|c48111_g3|c49280_g1|c49405_g3|c49440_g1|c50513_g1|c50801_g2|c51044_g1|c51439_g1|c51939_g1|c52505_g3	390	5.2e-10	2.45613e-07
GO:0009737	response to abscisic acid	45	c26255_g1|c31703_g1|c33679_g2|c34444_g1|c34881_g1|c36542_g1|c36890_g3|c37222_g1|c38306_g1|c40363_g1|c41771_g1|c41950_g1|c42428_g1|c42875_g2|c42915_g1|c43460_g1|c43820_g1|c44124_g1|c44174_g1|c44870_g1|c44870_g2|c45177_g1|c45895_g1|c46167_g1|c46292_g1|c46575_g1|c46742_g1|c46760_g3|c47280_g1|c47290_g2|c47893_g1|c48385_g1|c48982_g2|c49059_g2|c50146_g1|c50423_g4|c50725_g1|c50914_g1|c51595_g1|c51730_g1…	553	1.1e-09	4.98784e-07
GO:0071229	cellular response to acid chemical	42	c26255_g1|c31703_g1|c33679_g2|c34444_g1|c37222_g1|c38906_g2|c39838_g1|c40244_g1|c40363_g1|c41950_g1|c42009_g1|c42177_g1|c42428_g1|c43165_g2|c43460_g1|c44124_g1|c44174_g1|c45177_g1|c45225_g1|c45895_g1|c46292_g1|c46528_g2|c46575_g1|c46742_g1|c46760_g3|c47290_g2|c47536_g1|c47893_g1|c48124_g1|c48385_g1|c48444_g2|c49046_g3|c49059_g2|c49556_g1|c50146_g1|c50914_g1|c51595_g1|c52001_g4|c52063_g2|c52351_g3…	514	3.4e-09	1.4824e-06
GO:0050896	response to stimulus	414	c15702_g1|c16523_g1|c16523_g2|c19633_g1|c22377_g1|c23159_g1|c23416_g1|c24994_g1|c25259_g2|c25519_g1|c26255_g1|c26743_g2|c27045_g2|c27217_g1|c27810_g1|c29022_g1|c29023_g1|c30518_g1|c31703_g1|c31896_g1|c32201_g1|c32760_g3|c32931_g1|c32938_g1|c33095_g1|c33679_g2|c34000_g1|c34364_g1|c34377_g1|c34401_g1|c34444_g1|c34498_g1|c34551_g1|c34634_g1|c34881_g1|c34884_g1|c34946_g2|c35072_g1|c35072_g2|c35214_g2…	11155	5.9e-09	2.47713e-06
GO:0042742	defense response to bacterium	35	c23416_g1|c35336_g1|c38020_g1|c39838_g1|c40075_g2|c40277_g1|c40277_g2|c40491_g1|c40491_g2|c41685_g1|c42193_g1|c42378_g1|c43165_g2|c43365_g1|c43365_g2|c44782_g1|c45313_g1|c45313_g3|c45522_g1|c47536_g1|c47769_g1|c47916_g1|c48213_g1|c48697_g1|c49313_g5|c49593_g2|c50527_g1|c51746_g1|c52001_g4|c52152_g1|c52685_g1|c52709_g1|c52734_g2|c52904_g1|c74495_g1	392	7.4e-09	2.99594e-06
GO:0009734	auxin-activated signaling pathway	28	c27217_g1|c32760_g3|c37525_g1|c37918_g1|c39094_g1|c39433_g1|c42294_g2|c42504_g2|c44263_g2|c44332_g1|c44332_g2|c45055_g1|c45177_g1|c45681_g1|c45818_g1|c46274_g6|c46876_g1|c47513_g2|c47616_g3|c47966_g1|c47966_g2|c50053_g1|c50387_g1|c50508_g1|c51685_g2|c51825_g1|c52079_g3|c52869_g1	277	1.7e-08	6.64524e-06
GO:0009644	response to high light intensity	15	c30518_g1|c35631_g1|c37130_g1|c37490_g1|c38153_g1|c38153_g2|c42277_g1|c42719_g1|c42915_g1|c45601_g1|c47280_g1|c49280_g1|c49638_g1|c51044_g1|c51439_g1	86	3e-08	1.1336e-05
GO:0009642	response to light intensity	19	c30518_g1|c35631_g1|c36868_g1|c37130_g1|c37490_g1|c38153_g1|c38153_g2|c40144_g1|c41969_g1|c42277_g1|c42719_g1|c42915_g1|c45601_g1|c46742_g1|c47280_g1|c49280_g1|c49638_g1|c51044_g1|c51439_g1	141	3.6e-08	1.31644e-05
GO:0071365	cellular response to auxin stimulus	28	c27217_g1|c32760_g3|c37525_g1|c37918_g1|c39094_g1|c39433_g1|c42294_g2|c42504_g2|c44263_g2|c44332_g1|c44332_g2|c45055_g1|c45177_g1|c45681_g1|c45818_g1|c46274_g6|c46876_g1|c47513_g2|c47616_g3|c47966_g1|c47966_g2|c50053_g1|c50387_g1|c50508_g1|c51685_g2|c51825_g1|c52079_g3|c52869_g1	290	4.5e-08	1.59412e-05
GO:0010033	response to organic substance	143	c23159_g1|c23416_g1|c26255_g1|c27217_g1|c27810_g1|c31703_g1|c32760_g3|c33679_g2|c34444_g1|c34634_g1|c34881_g1|c35072_g1|c35072_g2|c35720_g1|c35748_g1|c35850_g2|c36542_g1|c36890_g3|c37073_g1|c37222_g1|c37410_g1|c37525_g1|c37918_g1|c38306_g1|c38489_g1|c38819_g1|c38906_g2|c39094_g1|c39433_g1|c39692_g1|c39838_g1|c40144_g1|c40244_g1|c40363_g1|c40389_g2|c40460_g1|c40894_g1|c41265_g1|c41642_g1|c41771_g1…	3138	8.9e-08	3.05728e-05
GO:0009738	abscisic acid-activated signaling pathway	24	c26255_g1|c31703_g1|c33679_g2|c37222_g1|c40363_g1|c41950_g1|c42428_g1|c43460_g1|c44124_g1|c44174_g1|c45177_g1|c45895_g1|c46292_g1|c46742_g1|c46760_g3|c47893_g1|c48385_g1|c49059_g2|c50146_g1|c50914_g1|c51595_g1|c52063_g2|c52351_g3|c52954_g1	231	1e-07	3.33412e-05
GO:0010031	circumnutation	6	c44870_g1|c44870_g2|c47371_g1|c47836_g1|c50599_g1|c50662_g4	10	1.2e-07	3.88663e-05
GO:0071215	cellular response to abscisic acid stimulus	25	c26255_g1|c31703_g1|c33679_g2|c34444_g1|c37222_g1|c40363_g1|c41950_g1|c42428_g1|c43460_g1|c44124_g1|c44174_g1|c45177_g1|c45895_g1|c46292_g1|c46742_g1|c46760_g3|c47893_g1|c48385_g1|c49059_g2|c50146_g1|c50914_g1|c51595_g1|c52063_g2|c52351_g3|c52954_g1	253	1.5e-07	4.72333e-05
GO:0009733	response to auxin	33	c27217_g1|c32760_g3|c37525_g1|c37918_g1|c39094_g1|c39433_g1|c42294_g2|c42504_g2|c44263_g2|c44332_g1|c44332_g2|c44769_g1|c44870_g1|c44870_g2|c45055_g1|c45177_g1|c45681_g1|c45818_g1|c46274_g6|c46876_g1|c47513_g2|c47616_g3|c47850_g1|c47966_g1|c47966_g2|c50053_g1|c50387_g1|c50508_g1|c51685_g2|c51825_g1|c51988_g1|c52079_g3|c52869_g1	417	3.3e-07	0.000101105
GO:0052545	callose localization	10	c16523_g1|c16523_g2|c40075_g2|c40277_g1|c40277_g2|c42378_g1|c43366_g1|c44174_g1|c48697_g1|c49593_g2	43	3.7e-07	0.000110377
GO:0009409	response to cold	33	c31703_g1|c34881_g1|c36890_g3|c38306_g1|c38819_g1|c39019_g1|c39765_g1|c39765_g2|c41019_g1|c41950_g1|c42346_g1|c42875_g2|c42915_g1|c43460_g1|c43508_g2|c44808_g1|c44870_g1|c44870_g2|c45475_g2|c46104_g2|c46167_g1|c46406_g1|c46526_g1|c47280_g1|c47850_g1|c48072_g2|c48405_g1|c49550_g2|c49584_g1|c50725_g1|c51419_g1|c51755_g3|c51988_g1	421	4.1e-07	0.000119173
GO:0097305	response to alcohol	48	c26255_g1|c31703_g1|c33679_g2|c34444_g1|c34881_g1|c35720_g1|c35748_g1|c36542_g1|c36890_g3|c37222_g1|c38306_g1|c40363_g1|c41265_g1|c41771_g1|c41950_g1|c42428_g1|c42875_g2|c42915_g1|c43460_g1|c43820_g1|c44124_g1|c44174_g1|c44870_g1|c44870_g2|c45177_g1|c45895_g1|c46167_g1|c46292_g1|c46575_g1|c46742_g1|c46760_g3|c47280_g1|c47290_g2|c47893_g1|c48385_g1|c48982_g2|c49059_g2|c50146_g1|c50423_g4|c50725_g1…	757	6.7e-07	0.000189878
GO:1901701	cellular response to oxygen-containing compound	63	c26255_g1|c31703_g1|c33679_g2|c34444_g1|c34498_g1|c35720_g1|c35748_g1|c37073_g1|c37222_g1|c38906_g2|c39838_g1|c40122_g1|c40244_g1|c40363_g1|c40491_g1|c40491_g2|c41212_g1|c41265_g1|c41950_g1|c42009_g1|c42177_g1|c42428_g1|c43048_g1|c43165_g2|c43274_g1|c43460_g1|c44124_g1|c44174_g1|c44183_g3|c44669_g1|c45177_g1|c45225_g1|c45895_g1|c46080_g1|c46292_g1|c46528_g2|c46575_g1|c46714_g1|c46742_g1|c46760_g3…	1117	7.7e-07	0.000212896
GO:0009416	response to light stimulus	52	c27217_g1|c30518_g1|c32938_g1|c34551_g1|c35072_g1|c35072_g2|c35631_g1|c36868_g1|c37130_g1|c37490_g1|c38153_g1|c38153_g2|c40144_g1|c40491_g1|c40491_g2|c40867_g1|c41969_g1|c42277_g1|c42346_g1|c42378_g1|c42503_g1|c42504_g2|c42719_g1|c42915_g1|c44138_g2|c44769_g1|c44808_g1|c44870_g1|c44870_g2|c45601_g1|c45828_g2|c46086_g2|c46312_g3|c46406_g1|c46528_g2|c46742_g1|c47280_g1|c47290_g2|c48072_g2|c48075_g1…	858	9e-07	0.000242914
GO:0052543	callose deposition in cell wall	9	c16523_g1|c16523_g2|c40075_g2|c40277_g1|c40277_g2|c42378_g1|c43366_g1|c48697_g1|c49593_g2	37	9.4e-07	0.00024781
GO:0097306	cellular response to alcohol	28	c26255_g1|c31703_g1|c33679_g2|c34444_g1|c35720_g1|c35748_g1|c37222_g1|c40363_g1|c41265_g1|c41950_g1|c42428_g1|c43460_g1|c44124_g1|c44174_g1|c45177_g1|c45895_g1|c46292_g1|c46742_g1|c46760_g3|c47893_g1|c48385_g1|c49059_g2|c50146_g1|c50914_g1|c51595_g1|c52063_g2|c52351_g3|c52954_g1	338	1e-06	0.000249392
GO:0052305	positive regulation by organism of innate immune response in other organism involved in symbiotic interaction	5	c40491_g1|c40491_g2|c44191_g1|c44191_g2|c50510_g2	8	1.1e-06	0.000249392
GO:0052308	pathogen-associated molecular pattern dependent modulation by organism of innate immune response in other organism involved in symbiotic interaction	5	c40491_g1|c40491_g2|c44191_g1|c44191_g2|c50510_g2	8	1.1e-06	0.000249392
GO:0052169	pathogen-associated molecular pattern dependent modulation by symbiont of host innate immune response	5	c40491_g1|c40491_g2|c44191_g1|c44191_g2|c50510_g2	8	1.1e-06	0.000249392
GO:0052033	pathogen-associated molecular pattern dependent induction by symbiont of host innate immune response	5	c40491_g1|c40491_g2|c44191_g1|c44191_g2|c50510_g2	8	1.1e-06	0.000249392
GO:0052257	pathogen-associated molecular pattern dependent induction by organism of innate immune response of other organism involved in symbiotic interaction	5	c40491_g1|c40491_g2|c44191_g1|c44191_g2|c50510_g2	8	1.1e-06	0.000249392
GO:0052166	positive regulation by symbiont of host innate immune response	5	c40491_g1|c40491_g2|c44191_g1|c44191_g2|c50510_g2	8	1.1e-06	0.000249392
GO:0052386	cell wall thickening	9	c16523_g1|c16523_g2|c40075_g2|c40277_g1|c40277_g2|c42378_g1|c43366_g1|c48697_g1|c49593_g2	38	1.2e-06	0.000266729
GO:0033037	polysaccharide localization	10	c16523_g1|c16523_g2|c40075_g2|c40277_g1|c40277_g2|c42378_g1|c43366_g1|c44174_g1|c48697_g1|c49593_g2	49	1.3e-06	0.0002834
GO:0048367	shoot system development	52	c31703_g1|c31896_g1|c32396_g1|c33906_g1|c34444_g1|c36626_g1|c37073_g1|c37410_g1|c37919_g1|c39094_g1|c39838_g1|c40263_g1|c41771_g1|c41876_g2|c42009_g1|c42294_g2|c42346_g1|c43165_g2|c43460_g1|c44138_g2|c44263_g2|c44870_g1|c44870_g2|c45177_g1|c45859_g3|c46086_g2|c46104_g2|c46175_g1|c46279_g1|c46528_g2|c46583_g1|c47522_g1|c48075_g1|c48082_g1|c48441_g2|c48444_g2|c49402_g3|c49441_g2|c49556_g1|c49807_g1…	880	1.9e-06	0.000406385
GO:0010286	heat acclimation	11	c32931_g1|c37490_g1|c37788_g1|c38122_g1|c40443_g1|c40443_g2|c43359_g1|c44124_g1|c46968_g2|c49440_g1|c50801_g2	67	3.8e-06	0.000797719
GO:0052306	modulation by organism of innate immune response in other organism involved in symbiotic interaction	5	c40491_g1|c40491_g2|c44191_g1|c44191_g2|c50510_g2	10	4.8e-06	0.000954611
GO:0033993	response to lipid	56	c23416_g1|c26255_g1|c31703_g1|c33679_g2|c34444_g1|c34881_g1|c35720_g1|c35748_g1|c36542_g1|c36890_g3|c37222_g1|c38306_g1|c40363_g1|c40389_g2|c41265_g1|c41771_g1|c41950_g1|c42009_g1|c42177_g1|c42428_g1|c42469_g2|c42875_g2|c42915_g1|c43460_g1|c43820_g1|c44124_g1|c44174_g1|c44870_g1|c44870_g2|c45177_g1|c45895_g1|c46104_g2|c46167_g1|c46292_g1|c46528_g2|c46575_g1|c46742_g1|c46760_g3|c47280_g1|c47290_g2…	1007	4.8e-06	0.000954611
GO:0052167	modulation by symbiont of host innate immune response	5	c40491_g1|c40491_g2|c44191_g1|c44191_g2|c50510_g2	10	4.8e-06	0.000954611
GO:0009314	response to radiation	55	c27217_g1|c30518_g1|c32938_g1|c34551_g1|c35072_g1|c35072_g2|c35631_g1|c36353_g1|c36868_g1|c37130_g1|c37490_g1|c38153_g1|c38153_g2|c40144_g1|c40491_g1|c40491_g2|c40867_g1|c41969_g1|c42277_g1|c42346_g1|c42378_g1|c42503_g1|c42504_g2|c42719_g1|c42915_g1|c44138_g2|c44769_g1|c44808_g1|c44870_g1|c44870_g2|c45601_g1|c45828_g2|c46086_g2|c46312_g3|c46406_g1|c46528_g2|c46742_g1|c46833_g1|c47280_g1|c47290_g2…	984	5e-06	0.000977241
GO:0009415	response to water	27	c27810_g1|c31703_g1|c34881_g1|c35072_g1|c35072_g2|c36890_g3|c37119_g1|c37879_g1|c37879_g3|c39765_g1|c41950_g1|c42915_g1|c43460_g1|c43820_g1|c45828_g2|c46167_g1|c46526_g1|c47280_g1|c48072_g2|c49046_g3|c49313_g5|c49440_g1|c49584_g1|c50977_g2|c51595_g1|c51788_g2|c52820_g1	348	5.5e-06	0.00105675
GO:0009791	post-embryonic development	78	c19633_g1|c24994_g1|c32396_g1|c33699_g1|c33906_g1|c34881_g1|c35072_g1|c35072_g2|c36626_g1|c37073_g1|c37918_g1|c37919_g1|c38031_g1|c39764_g1|c39838_g1|c40263_g1|c41019_g1|c41265_g1|c41300_g4|c41771_g1|c41950_g1|c42009_g1|c42277_g1|c42294_g2|c42346_g1|c43250_g1|c43316_g1|c44138_g2|c44263_g2|c44870_g1|c44870_g2|c45177_g1|c46086_g2|c46104_g2|c46175_g1|c46213_g1|c46312_g3|c46528_g2|c47290_g2|c47412_g1…	1587	7.3e-06	0.00137921
GO:0010260	animal organ senescence	15	c30767_g1|c31703_g1|c31896_g1|c34444_g1|c43165_g2|c43460_g1|c44138_g2|c45859_g3|c46279_g1|c47522_g1|c48444_g2|c49402_g3|c50262_g1|c51746_g1|c52592_g3	132	8.3e-06	0.00154244
GO:0009414	response to water deprivation	26	c27810_g1|c31703_g1|c34881_g1|c35072_g1|c35072_g2|c36890_g3|c37119_g1|c37879_g1|c37879_g3|c39765_g1|c41950_g1|c42915_g1|c43460_g1|c43820_g1|c45828_g2|c46167_g1|c46526_g1|c47280_g1|c48072_g2|c49046_g3|c49313_g5|c49440_g1|c49584_g1|c50977_g2|c51595_g1|c52820_g1	336	8.5e-06	0.00154745
GO:0071310	cellular response to organic substance	93	c26255_g1|c27217_g1|c27810_g1|c31703_g1|c32760_g3|c33679_g2|c34444_g1|c35720_g1|c35748_g1|c37073_g1|c37222_g1|c37410_g1|c37525_g1|c37918_g1|c38906_g2|c39094_g1|c39433_g1|c39838_g1|c40244_g1|c40363_g1|c40460_g1|c40894_g1|c41265_g1|c41950_g1|c42009_g1|c42160_g1|c42177_g1|c42294_g2|c42428_g1|c42504_g2|c43048_g1|c43165_g2|c43460_g1|c44124_g1|c44174_g1|c44263_g2|c44332_g1|c44332_g2|c44799_g1|c45055_g1…	1998	8.6e-06	0.00154745
GO:0071396	cellular response to lipid	33	c26255_g1|c31703_g1|c33679_g2|c34444_g1|c35720_g1|c35748_g1|c37222_g1|c40363_g1|c41265_g1|c41950_g1|c42009_g1|c42177_g1|c42428_g1|c43460_g1|c44124_g1|c44174_g1|c45177_g1|c45895_g1|c46292_g1|c46528_g2|c46742_g1|c46760_g3|c47290_g2|c47893_g1|c48385_g1|c49059_g2|c49556_g1|c50146_g1|c50914_g1|c51595_g1|c52063_g2|c52351_g3|c52954_g1	485	8.8e-06	0.0015587
GO:0070887	cellular response to chemical stimulus	112	c26255_g1|c27217_g1|c27810_g1|c31703_g1|c32760_g3|c33679_g2|c34444_g1|c34498_g1|c35720_g1|c35748_g1|c37073_g1|c37222_g1|c37410_g1|c37525_g1|c37918_g1|c38906_g2|c39094_g1|c39433_g1|c39838_g1|c40122_g1|c40244_g1|c40363_g1|c40460_g1|c40491_g1|c40491_g2|c40894_g1|c41212_g1|c41265_g1|c41950_g1|c42009_g1|c42160_g1|c42177_g1|c42294_g2|c42428_g1|c42504_g2|c43048_g1|c43165_g2|c43274_g1|c43460_g1|c43517_g1…	2531	9.8e-06	0.00170912
GO:0009867	jasmonic acid mediated signaling pathway	11	c38906_g2|c39838_g1|c43165_g2|c45225_g1|c46528_g2|c46575_g1|c47290_g2|c47536_g1|c48444_g2|c52001_g4|c74495_g1	74	1e-05	0.00171758
GO:0010150	leaf senescence	14	c31703_g1|c31896_g1|c34444_g1|c43165_g2|c43460_g1|c44138_g2|c45859_g3|c46279_g1|c47522_g1|c48444_g2|c49402_g3|c50262_g1|c51746_g1|c52592_g3	119	1.1e-05	0.00186113
GO:0050879	multicellular organismal movement	6	c44870_g1|c44870_g2|c47371_g1|c47836_g1|c50599_g1|c50662_g4	19	1.2e-05	0.00200047
GO:0071395	cellular response to jasmonic acid stimulus	11	c38906_g2|c39838_g1|c43165_g2|c45225_g1|c46528_g2|c46575_g1|c47290_g2|c47536_g1|c48444_g2|c52001_g4|c74495_g1	76	1.3e-05	0.00213577
GO:0005976	polysaccharide metabolic process	47	c19633_g1|c23187_g1|c29658_g1|c32041_g1|c32933_g1|c33714_g1|c33714_g2|c34528_g1|c35599_g1|c36546_g1|c38485_g2|c39956_g1|c39956_g2|c40141_g1|c40244_g1|c40737_g1|c40999_g1|c41263_g1|c41263_g2|c41300_g4|c42428_g1|c42865_g1|c43081_g1|c43225_g1|c45141_g2|c46174_g1|c46412_g1|c46800_g1|c47146_g1|c47412_g1|c47530_g2|c47548_g1|c48124_g1|c48845_g1|c49519_g1|c49836_g1|c50866_g1|c51002_g1|c51049_g1|c51064_g1…	826	1.5e-05	0.00242914
GO:0009617	response to bacterium	39	c23416_g1|c35336_g1|c37073_g1|c38020_g1|c39838_g1|c40075_g2|c40277_g1|c40277_g2|c40491_g1|c40491_g2|c41685_g1|c42193_g1|c42378_g1|c43165_g2|c43360_g1|c43365_g1|c43365_g2|c44782_g1|c45313_g1|c45313_g3|c45522_g1|c47192_g1|c47536_g1|c47769_g1|c47916_g1|c48213_g1|c48697_g1|c49313_g5|c49593_g2|c50527_g1|c51746_g1|c51878_g1|c52001_g4|c52152_g1|c52685_g1|c52709_g1|c52734_g2|c52904_g1|c74495_g1	636	1.6e-05	0.00255459
GO:0019760	glucosinolate metabolic process	10	c29650_g2|c35850_g2|c40075_g2|c40277_g1|c40277_g2|c42378_g1|c46620_g1|c47883_g1|c49593_g2|c50228_g1	64	1.7e-05	0.00260422
GO:0016143	S-glycoside metabolic process	10	c29650_g2|c35850_g2|c40075_g2|c40277_g1|c40277_g2|c42378_g1|c46620_g1|c47883_g1|c49593_g2|c50228_g1	64	1.7e-05	0.00260422
GO:0019757	glycosinolate metabolic process	10	c29650_g2|c35850_g2|c40075_g2|c40277_g1|c40277_g2|c42378_g1|c46620_g1|c47883_g1|c49593_g2|c50228_g1	64	1.7e-05	0.00260422
GO:0019761	glucosinolate biosynthetic process	8	c29650_g2|c35850_g2|c40075_g2|c40277_g1|c40277_g2|c42378_g1|c47883_g1|c50228_g1	40	1.8e-05	0.00264997
GO:0016144	S-glycoside biosynthetic process	8	c29650_g2|c35850_g2|c40075_g2|c40277_g1|c40277_g2|c42378_g1|c47883_g1|c50228_g1	40	1.8e-05	0.00264997
GO:0019758	glycosinolate biosynthetic process	8	c29650_g2|c35850_g2|c40075_g2|c40277_g1|c40277_g2|c42378_g1|c47883_g1|c50228_g1	40	1.8e-05	0.00264997
GO:0009850	auxin metabolic process	9	c37918_g1|c40277_g1|c40277_g2|c40750_g1|c42378_g1|c47966_g1|c47966_g2|c48697_g1|c49293_g1	53	2.2e-05	0.00319733
GO:0052510	positive regulation by organism of defense response of other organism involved in symbiotic interaction	5	c40491_g1|c40491_g2|c44191_g1|c44191_g2|c50510_g2	13	2.3e-05	0.0032591
GO:0052509	positive regulation by symbiont of host defense response	5	c40491_g1|c40491_g2|c44191_g1|c44191_g2|c50510_g2	13	2.3e-05	0.0032591
GO:0009651	response to salt stress	37	c16523_g1|c16523_g2|c27810_g1|c31703_g1|c31896_g1|c34884_g1|c35072_g1|c35072_g2|c36890_g3|c37073_g1|c37689_g1|c38819_g1|c39600_g1|c41950_g1|c42428_g1|c42875_g2|c42915_g1|c43460_g1|c46048_g1|c46048_g2|c46167_g1|c46192_g1|c46526_g1|c47280_g1|c47290_g2|c47731_g1|c47769_g1|c48058_g1|c48072_g2|c50423_g4|c50966_g2|c50977_g2|c51930_g2|c51988_g1|c52076_g1|c52505_g3|c52917_g1	603	2.5e-05	0.00349877
GO:0019748	secondary metabolic process	25	c29023_g1|c29650_g2|c31896_g1|c33949_g1|c35072_g1|c35072_g2|c35850_g2|c40075_g2|c40277_g1|c40277_g2|c41814_g1|c42378_g1|c45828_g2|c46279_g1|c46620_g1|c46737_g1|c47883_g1|c48697_g1|c49593_g2|c50228_g1|c50513_g1|c50527_g1|c50915_g1|c51002_g1|c51419_g1	339	2.8e-05	0.00387083
GO:0052542	defense response by callose deposition	7	c40075_g2|c40277_g1|c40277_g2|c42378_g1|c44174_g1|c48697_g1|c49593_g2	32	3.3e-05	0.00450708
GO:0009684	indoleacetic acid biosynthetic process	5	c40277_g1|c40277_g2|c40750_g1|c42378_g1|c48697_g1	14	3.5e-05	0.00461349
GO:0052555	positive regulation by organism of immune response of other organism involved in symbiotic interaction	5	c40491_g1|c40491_g2|c44191_g1|c44191_g2|c50510_g2	14	3.5e-05	0.00461349
GO:0052556	positive regulation by symbiont of host immune response	5	c40491_g1|c40491_g2|c44191_g1|c44191_g2|c50510_g2	14	3.5e-05	0.00461349
GO:0009605	response to external stimulus	108	c15702_g1|c23416_g1|c24994_g1|c29022_g1|c32938_g1|c34000_g1|c35336_g1|c35421_g1|c35720_g1|c35850_g2|c36542_g1|c36868_g1|c37073_g1|c37172_g1|c38020_g1|c38906_g2|c39178_g1|c39489_g1|c39686_g1|c39838_g1|c40049_g2|c40075_g2|c40144_g1|c40277_g1|c40277_g2|c40491_g1|c40491_g2|c40986_g1|c41451_g1|c41525_g2|c41685_g1|c41942_g1|c41969_g1|c42011_g1|c42119_g1|c42193_g1|c42277_g1|c42346_g1|c42378_g1|c42989_g1…	2513	4.7e-05	0.00612405
GO:0071555	cell wall organization	20	c16523_g1|c16523_g2|c34528_g1|c36165_g1|c39670_g1|c39874_g1|c40075_g2|c40277_g1|c40277_g2|c40999_g1|c42378_g1|c43366_g1|c45613_g1|c47396_g1|c47548_g1|c48697_g1|c49593_g2|c51002_g1|c51049_g1|c51903_g1	248	5.1e-05	0.00649591
GO:0009683	indoleacetic acid metabolic process	5	c40277_g1|c40277_g2|c40750_g1|c42378_g1|c48697_g1	15	5.1e-05	0.00649591
GO:0009682	induced systemic resistance	6	c40277_g1|c40277_g2|c42378_g1|c43165_g2|c48697_g1|c52001_g4	24	5.4e-05	0.0068016
GO:0061458	reproductive system development	66	c19633_g1|c21190_g1|c32396_g1|c33906_g1|c36626_g1|c37073_g1|c37919_g1|c38031_g1|c39764_g1|c39838_g1|c40263_g1|c40606_g1|c40730_g2|c41300_g4|c41525_g2|c41771_g1|c41950_g1|c42009_g1|c42011_g1|c42277_g1|c42294_g2|c42346_g1|c44483_g1|c44870_g1|c44870_g2|c45177_g1|c46086_g2|c46104_g2|c46175_g1|c46213_g1|c46312_g3|c46528_g2|c47176_g2|c47290_g2|c47412_g1|c47700_g1|c48020_g1|c48058_g1|c48075_g1|c48082_g1…	1369	6.5e-05	0.00800913
GO:0048608	reproductive structure development	66	c19633_g1|c21190_g1|c32396_g1|c33906_g1|c36626_g1|c37073_g1|c37919_g1|c38031_g1|c39764_g1|c39838_g1|c40263_g1|c40606_g1|c40730_g2|c41300_g4|c41525_g2|c41771_g1|c41950_g1|c42009_g1|c42011_g1|c42277_g1|c42294_g2|c42346_g1|c44483_g1|c44870_g1|c44870_g2|c45177_g1|c46086_g2|c46104_g2|c46175_g1|c46213_g1|c46312_g3|c46528_g2|c47176_g2|c47290_g2|c47412_g1|c47700_g1|c48020_g1|c48058_g1|c48075_g1|c48082_g1…	1369	6.5e-05	0.00800913
GO:0048507	meristem development	21	c31855_g1|c33906_g1|c36626_g1|c41950_g1|c43984_g1|c45123_g1|c45541_g1|c46104_g2|c47807_g2|c48071_g1|c48071_g2|c48128_g3|c48704_g4|c50095_g1|c50701_g2|c51015_g3|c52079_g3|c52249_g1|c52351_g3|c52364_g1|c52709_g1	273	6.6e-05	0.0080449
GO:0010112	regulation of systemic acquired resistance	5	c40277_g1|c40277_g2|c41685_g1|c45225_g1|c47028_g1	16	7.2e-05	0.00868289
GO:0009873	ethylene-activated signaling pathway	20	c27810_g1|c40460_g1|c42160_g1|c44174_g1|c44799_g1|c46167_g1|c46175_g1|c46492_g2|c48211_g3|c48704_g4|c49059_g2|c49441_g2|c49584_g1|c49584_g5|c49816_g3|c50701_g1|c51520_g2|c51789_g2|c52001_g4|c52249_g1	256	7.9e-05	0.00942678
GO:0071369	cellular response to ethylene stimulus	21	c27810_g1|c40460_g1|c42160_g1|c43048_g1|c44174_g1|c44799_g1|c46167_g1|c46175_g1|c46492_g2|c48211_g3|c48704_g4|c49059_g2|c49441_g2|c49584_g1|c49584_g5|c49816_g3|c50701_g1|c51520_g2|c51789_g2|c52001_g4|c52249_g1	279	9e-05	0.0106275
GO:0045229	external encapsulating structure organization	23	c16523_g1|c16523_g2|c34528_g1|c36165_g1|c39670_g1|c39874_g1|c40075_g2|c40277_g1|c40277_g2|c40999_g1|c42378_g1|c43366_g1|c45613_g1|c46302_g2|c47396_g1|c47412_g1|c47548_g1|c48697_g1|c49593_g2|c51002_g1|c51049_g1|c51903_g1|c51959_g1	324	0.0001	0.0115673
GO:0071554	cell wall organization or biogenesis	35	c16523_g1|c16523_g2|c19633_g1|c23187_g1|c32933_g1|c34257_g1|c34528_g1|c36165_g1|c37919_g1|c39670_g1|c39874_g1|c40075_g2|c40141_g1|c40244_g1|c40277_g1|c40277_g2|c40999_g1|c42378_g1|c43081_g1|c43366_g1|c45141_g2|c45383_g2|c45613_g1|c47396_g1|c47530_g2|c47548_g1|c48124_g1|c48697_g1|c49593_g2|c51002_g1|c51049_g1|c51830_g1|c51903_g1|c52647_g1|c52963_g2	597	0.0001	0.0115673
GO:0006073	cellular glucan metabolic process	24	c35599_g1|c36546_g1|c39956_g1|c39956_g2|c40244_g1|c40737_g1|c40999_g1|c41263_g1|c41263_g2|c41300_g4|c42428_g1|c42865_g1|c43081_g1|c43225_g1|c46174_g1|c46412_g1|c47146_g1|c48124_g1|c49836_g1|c50866_g1|c51830_g1|c52171_g1|c52956_g1|c54009_g1	348	0.00011	0.0123461
GO:0044042	glucan metabolic process	24	c35599_g1|c36546_g1|c39956_g1|c39956_g2|c40244_g1|c40737_g1|c40999_g1|c41263_g1|c41263_g2|c41300_g4|c42428_g1|c42865_g1|c43081_g1|c43225_g1|c46174_g1|c46412_g1|c47146_g1|c48124_g1|c49836_g1|c50866_g1|c51830_g1|c52171_g1|c52956_g1|c54009_g1	348	0.00011	0.0123461
GO:0044550	secondary metabolite biosynthetic process	17	c29650_g2|c31896_g1|c33949_g1|c35850_g2|c40075_g2|c40277_g1|c40277_g2|c42378_g1|c45828_g2|c47883_g1|c48697_g1|c49593_g2|c50228_g1|c50513_g1|c50915_g1|c51002_g1|c51419_g1	202	0.00011	0.0123461
GO:0006970	response to osmotic stress	41	c16523_g1|c16523_g2|c27810_g1|c31703_g1|c31896_g1|c34444_g1|c34884_g1|c35072_g1|c35072_g2|c36890_g3|c37073_g1|c37689_g1|c38819_g1|c39600_g1|c41019_g1|c41950_g1|c42428_g1|c42875_g2|c42915_g1|c43460_g1|c44174_g1|c46048_g1|c46048_g2|c46167_g1|c46192_g1|c46526_g1|c47280_g1|c47290_g2|c47731_g1|c47769_g1|c48058_g1|c48072_g2|c49059_g2|c50423_g4|c50966_g2|c50977_g2|c51930_g2|c51988_g1|c52076_g1|c52505_g3…	749	0.00012	0.013207
GO:0045088	regulation of innate immune response	16	c40049_g2|c40277_g1|c40277_g2|c40491_g1|c40491_g2|c41685_g1|c43165_g2|c43360_g1|c44191_g1|c44191_g2|c45225_g1|c46575_g1|c47028_g1|c50510_g2|c51878_g1|c52001_g4	184	0.00012	0.013207
GO:0005975	carbohydrate metabolic process	118	c19633_g1|c23187_g1|c25647_g1|c26489_g1|c28328_g1|c29658_g1|c31896_g1|c32041_g1|c32933_g1|c33714_g1|c33714_g2|c34528_g1|c35599_g1|c35661_g1|c36546_g1|c36890_g3|c38485_g2|c39956_g1|c39956_g2|c40141_g1|c40244_g1|c40730_g2|c40737_g1|c40999_g1|c41263_g1|c41263_g2|c41300_g4|c41382_g1|c41382_g2|c42009_g1|c42045_g1|c42261_g2|c42428_g1|c42448_g1|c42649_g1|c42732_g1|c42865_g1|c42889_g1|c42915_g1|c43081_g1…	2880	0.00015	0.01635
GO:0052482	defense response by cell wall thickening	6	c40075_g2|c40277_g1|c40277_g2|c42378_g1|c48697_g1|c49593_g2	29	0.00017	0.0181804
GO:0052544	defense response by callose deposition in cell wall	6	c40075_g2|c40277_g1|c40277_g2|c42378_g1|c48697_g1|c49593_g2	29	0.00017	0.0181804
GO:0045489	pectin biosynthetic process	8	c29658_g1|c33714_g1|c33714_g2|c48845_g1|c49519_g1|c51002_g1|c51064_g1|c52532_g1	55	0.00019	0.019943
GO:0010073	meristem maintenance	11	c36626_g1|c45541_g1|c46104_g2|c47807_g2|c48071_g1|c48071_g2|c48128_g3|c50701_g2|c51015_g3|c52249_g1|c52709_g1	101	0.00019	0.019943
GO:0010158	abaxial cell fate specification	4	c37918_g1|c47966_g1|c47966_g2|c48020_g1	11	0.00021	0.02184
GO:0031347	regulation of defense response	24	c15702_g1|c40049_g2|c40277_g1|c40277_g2|c40491_g1|c40491_g2|c41685_g1|c41771_g1|c43165_g2|c43360_g1|c44191_g1|c44191_g2|c44336_g1|c45225_g1|c45475_g2|c46575_g1|c47028_g1|c48213_g1|c48378_g1|c50510_g2|c51878_g1|c52001_g4|c52709_g1|c52734_g2	363	0.00022	0.022672
GO:0048827	phyllome development	28	c31703_g1|c31896_g1|c34444_g1|c37073_g1|c37919_g1|c39094_g1|c43165_g2|c43460_g1|c44138_g2|c44263_g2|c45177_g1|c45859_g3|c46175_g1|c46279_g1|c46528_g2|c46583_g1|c47522_g1|c48075_g1|c48082_g1|c48444_g2|c49402_g3|c49441_g2|c50262_g1|c50701_g2|c51599_g2|c51746_g1|c52592_g3|c52656_g1	456	0.00023	0.023489
GO:0048511	rhythmic process	16	c37130_g1|c40737_g1|c42009_g1|c42346_g1|c43250_g1|c44870_g1|c44870_g2|c46312_g3|c46883_g1|c47836_g1|c49015_g2|c50081_g1|c50662_g4|c51988_g1|c52695_g1|c52761_g1	198	0.00027	0.0273279
GO:0005982	starch metabolic process	9	c41263_g1|c41263_g2|c42428_g1|c46174_g1|c46412_g1|c47146_g1|c49836_g1|c52171_g1|c54009_g1	73	0.00028	0.0280892
GO:0009723	response to ethylene	24	c27810_g1|c40460_g1|c42160_g1|c43048_g1|c44174_g1|c44263_g2|c44799_g1|c46167_g1|c46175_g1|c46492_g2|c47290_g2|c48211_g3|c48704_g4|c49059_g2|c49441_g2|c49584_g1|c49584_g5|c49816_g3|c50701_g1|c51520_g2|c51789_g2|c51988_g1|c52001_g4|c52249_g1	370	0.00029	0.0288372
GO:0007623	circadian rhythm	12	c37130_g1|c40737_g1|c42346_g1|c43250_g1|c44870_g1|c44870_g2|c46312_g3|c47836_g1|c50662_g4|c51988_g1|c52695_g1|c52761_g1	125	0.00033	0.0325294
GO:0003006	developmental process involved in reproduction	76	c19633_g1|c21190_g1|c22355_g1|c25309_g1|c32396_g1|c33095_g1|c33906_g1|c35696_g2|c36392_g1|c36626_g1|c37073_g1|c37919_g1|c38031_g1|c39764_g1|c39838_g1|c39874_g1|c40263_g1|c40606_g1|c40730_g2|c40894_g1|c41086_g2|c41300_g4|c41525_g2|c41771_g1|c41950_g1|c42009_g1|c42011_g1|c42277_g1|c42294_g2|c42346_g1|c42504_g2|c44483_g1|c44870_g1|c44870_g2|c45177_g1|c46086_g2|c46104_g2|c46175_g1|c46213_g1|c46312_g3…	1729	0.00034	0.0332262
GO:0042744	hydrogen peroxide catabolic process	14	c34498_g1|c40122_g1|c40491_g1|c40491_g2|c41212_g1|c43274_g1|c44183_g3|c46080_g1|c46714_g1|c46883_g1|c48058_g1|c48398_g1|c49550_g2|c50081_g1	163	0.00035	0.0339111
GO:0052553	modulation by symbiont of host immune response	5	c40491_g1|c40491_g2|c44191_g1|c44191_g2|c50510_g2	22	0.00038	0.036199
GO:0052552	modulation by organism of immune response of other organism involved in symbiotic interaction	5	c40491_g1|c40491_g2|c44191_g1|c44191_g2|c50510_g2	22	0.00038	0.036199
GO:0000160	phosphorelay signal transduction system	20	c27810_g1|c40460_g1|c42160_g1|c44174_g1|c44799_g1|c46167_g1|c46175_g1|c46492_g2|c48211_g3|c48704_g4|c49059_g2|c49441_g2|c49584_g1|c49584_g5|c49816_g3|c50701_g1|c51520_g2|c51789_g2|c52001_g4|c52249_g1	289	0.00039	0.0365375
GO:0048366	leaf development	22	c31703_g1|c31896_g1|c34444_g1|c39094_g1|c43165_g2|c43460_g1|c44138_g2|c44263_g2|c45177_g1|c45859_g3|c46175_g1|c46279_g1|c46583_g1|c47522_g1|c48075_g1|c48444_g2|c49402_g3|c49441_g2|c50262_g1|c51599_g2|c51746_g1|c52592_g3	333	0.00039	0.0365375
GO:0006351	transcription, DNA-templated	200	c17926_g1|c22377_g1|c23416_g1|c26743_g2|c27217_g1|c27810_g1|c28666_g1|c31466_g1|c31529_g1|c31828_g1|c31896_g1|c32189_g2|c32201_g1|c32776_g1|c35236_g1|c35336_g1|c35720_g1|c36093_g1|c36353_g1|c36947_g2|c37071_g1|c37071_g3|c37073_g1|c37119_g1|c37410_g1|c37464_g1|c37879_g1|c37879_g3|c37918_g1|c37919_g1|c38038_g1|c38122_g1|c38489_g1|c38906_g2|c39094_g1|c39162_g1|c39692_g1|c39765_g1|c39765_g2|c39838_g1…	5445	0.0004	0.0371672
GO:0042743	hydrogen peroxide metabolic process	15	c34498_g1|c40122_g1|c40491_g1|c40491_g2|c41212_g1|c43274_g1|c44174_g1|c44183_g3|c46080_g1|c46714_g1|c46883_g1|c48058_g1|c48398_g1|c49550_g2|c50081_g1	186	0.00042	0.0387083
GO:0010120	camalexin biosynthetic process	4	c31896_g1|c40277_g1|c40277_g2|c48697_g1	13	0.00043	0.0389958
GO:0052317	camalexin metabolic process	4	c31896_g1|c40277_g1|c40277_g2|c48697_g1	13	0.00043	0.0389958
GO:0009751	response to salicylic acid	15	c34444_g1|c40244_g1|c41642_g1|c42203_g1|c42469_g2|c43165_g2|c45018_g2|c45389_g2|c45475_g2|c46167_g1|c46575_g1|c47290_g2|c47850_g1|c48124_g1|c51988_g1	188	0.00047	0.0422851
GO:0003700	transcription factor activity, sequence-specific DNA binding	145	c23416_g1|c27217_g1|c27810_g1|c31466_g1|c31896_g1|c32189_g2|c32776_g1|c35336_g1|c36353_g1|c36558_g1|c36947_g2|c37073_g1|c37119_g1|c37410_g1|c37464_g1|c37879_g1|c37879_g3|c37918_g1|c37919_g1|c38038_g1|c38122_g1|c38906_g2|c39162_g1|c39654_g1|c39692_g1|c39765_g1|c39765_g2|c40338_g2|c40389_g2|c40698_g1|c40880_g1|c41405_g2|c41771_g1|c41877_g1|c42011_g1|c42160_g1|c42203_g1|c42294_g2|c42308_g1|c42469_g1…	2530	1.5e-14	3.117e-11
GO:0001071	nucleic acid binding transcription factor activity	145	c23416_g1|c27217_g1|c27810_g1|c31466_g1|c31896_g1|c32189_g2|c32776_g1|c35336_g1|c36353_g1|c36558_g1|c36947_g2|c37073_g1|c37119_g1|c37410_g1|c37464_g1|c37879_g1|c37879_g3|c37918_g1|c37919_g1|c38038_g1|c38122_g1|c38906_g2|c39162_g1|c39654_g1|c39692_g1|c39765_g1|c39765_g2|c40338_g2|c40389_g2|c40698_g1|c40880_g1|c41405_g2|c41771_g1|c41877_g1|c42011_g1|c42160_g1|c42203_g1|c42294_g2|c42308_g1|c42469_g1…	2531	1.5e-14	3.117e-11
GO:0004674	protein serine/threonine kinase activity	91	c24994_g1|c25259_g2|c31713_g1|c32218_g1|c34022_g1|c34026_g2|c35626_g1|c35738_g1|c37783_g1|c37888_g1|c38659_g1|c38659_g2|c39102_g2|c39102_g3|c39600_g1|c40154_g1|c40460_g1|c41265_g1|c41435_g2|c41642_g1|c41655_g1|c41950_g1|c42321_g1|c43303_g1|c43360_g1|c43427_g2|c43734_g2|c43748_g1|c43893_g1|c44191_g1|c44191_g2|c44700_g1|c44764_g2|c45059_g1|c45059_g2|c45313_g1|c45313_g3|c45370_g2|c45532_g1|c45654_g1…	1461	2.7e-11	3.7404e-08
GO:0030246	carbohydrate binding	37	c25647_g1|c30767_g2|c32933_g1|c34401_g1|c38051_g1|c38051_g2|c38568_g1|c39118_g1|c41263_g1|c41263_g2|c41435_g2|c41642_g1|c42865_g1|c42905_g1|c43366_g1|c43366_g2|c44699_g2|c44769_g1|c45180_g3|c45370_g2|c45418_g1|c45588_g1|c46800_g1|c48510_g1|c48817_g1|c50359_g1|c50593_g5|c51497_g7|c52146_g2|c52307_g2|c52647_g1|c52743_g1|c52809_g1|c52809_g2|c52947_g1|c6469_g1|c6469_g2	441	1.9e-08	1.9741e-05
GO:0004553	hydrolase activity, hydrolyzing O-glycosyl compounds	44	c19633_g1|c32933_g1|c35599_g1|c37611_g1|c40141_g1|c40730_g2|c40999_g1|c41382_g1|c41382_g2|c42045_g1|c42448_g1|c42865_g1|c43081_g1|c43225_g1|c44571_g1|c45141_g2|c45432_g1|c45433_g3|c45588_g1|c45746_g2|c46114_g1|c47146_g1|c47396_g1|c47530_g2|c48094_g2|c48269_g1|c48691_g1|c49812_g1|c50359_g1|c50755_g1|c50866_g1|c50873_g2|c51087_g3|c51260_g1|c51260_g2|c51317_g1|c51858_g1|c51868_g1|c51876_g2|c52307_g2…	602	5.3e-08	4.40536e-05
GO:0004672	protein kinase activity	95	c24994_g1|c25259_g2|c31713_g1|c32218_g1|c34022_g1|c34026_g2|c35626_g1|c35738_g1|c37783_g1|c37888_g1|c38659_g1|c38659_g2|c39102_g2|c39102_g3|c39600_g1|c40154_g1|c40460_g1|c41265_g1|c41435_g2|c41642_g1|c41655_g1|c41950_g1|c42321_g1|c43303_g1|c43360_g1|c43427_g2|c43734_g2|c43748_g1|c43893_g1|c44191_g1|c44191_g2|c44700_g1|c44764_g2|c44957_g1|c45059_g1|c45059_g2|c45313_g1|c45313_g3|c45370_g2|c45532_g1…	1861	2.1e-07	0.00012468
GO:0016301	kinase activity	117	c24994_g1|c25259_g2|c25647_g1|c31713_g1|c3200_g1|c32218_g1|c34022_g1|c34026_g2|c35626_g1|c35738_g1|c37783_g1|c37888_g1|c38051_g1|c38051_g2|c38659_g1|c38659_g2|c39102_g2|c39102_g3|c39600_g1|c39874_g1|c40154_g1|c40460_g1|c41263_g1|c41263_g2|c41265_g1|c41425_g1|c41435_g2|c41642_g1|c41655_g1|c41950_g1|c42321_g1|c42649_g1|c42732_g1|c43303_g1|c43360_g1|c43427_g2|c43734_g2|c43748_g1|c43893_g1|c44191_g1|…	2447	2.3e-07	0.00012468
GO:0016798	hydrolase activity, acting on glycosyl bonds	47	c19633_g1|c32933_g1|c35599_g1|c37611_g1|c40141_g1|c40730_g2|c40999_g1|c41382_g1|c41382_g2|c42045_g1|c42448_g1|c42865_g1|c43081_g1|c43225_g1|c44571_g1|c45141_g2|c45330_g1|c45432_g1|c45433_g3|c45505_g1|c45588_g1|c45746_g2|c46114_g1|c47146_g1|c47396_g1|c47530_g2|c48094_g2|c48269_g1|c48691_g1|c48849_g1|c49812_g1|c50359_g1|c50755_g1|c50866_g1|c50873_g2|c51087_g3|c51260_g1|c51260_g2|c51317_g1|c51858_g1…	701	2.4e-07	0.00012468
GO:0016773	phosphotransferase activity, alcohol group as acceptor	109	c24994_g1|c25259_g2|c25647_g1|c31713_g1|c32218_g1|c34022_g1|c34026_g2|c35626_g1|c35738_g1|c37783_g1|c37888_g1|c38659_g1|c38659_g2|c39102_g2|c39102_g3|c39600_g1|c39874_g1|c40154_g1|c40460_g1|c41265_g1|c41425_g1|c41435_g2|c41642_g1|c41655_g1|c41950_g1|c42321_g1|c42649_g1|c42732_g1|c43303_g1|c43360_g1|c43427_g2|c43734_g2|c43748_g1|c43893_g1|c44191_g1|c44191_g2|c44700_g1|c44764_g2|c44957_g1|c45059_g1…	2240	2.7e-07	0.00012468
GO:0001871	pattern binding	11	c25647_g1|c32933_g1|c38568_g1|c41263_g1|c41263_g2|c41435_g2|c43366_g1|c43366_g2|c45180_g3|c45370_g2|c48817_g1	62	1.9e-06	0.000717855
GO:0030247	polysaccharide binding	11	c25647_g1|c32933_g1|c38568_g1|c41263_g1|c41263_g2|c41435_g2|c43366_g1|c43366_g2|c45180_g3|c45370_g2|c48817_g1	62	1.9e-06	0.000717855
GO:0004565	beta-galactosidase activity	9	c41382_g1|c41382_g2|c44571_g1|c45432_g1|c45588_g1|c52307_g2|c52809_g1|c52809_g2|c52947_g1	52	2e-05	0.00692667
GO:0010427	abscisic acid binding	5	c26255_g1|c40363_g1|c45895_g1|c46760_g3|c50146_g1	16	7.6e-05	0.0242966
GO:0055044	symplast	66	c24994_g1|c32534_g1|c32931_g1|c34000_g1|c34026_g2|c34257_g1|c34634_g1|c34881_g1|c35761_g1|c37172_g1|c37689_g1|c37788_g1|c37888_g1|c38020_g1|c38819_g1|c39489_g1|c39570_g1|c40154_g1|c40443_g1|c40443_g2|c40740_g2|c40986_g1|c41265_g1|c41655_g1|c41782_g2|c42277_g1|c42875_g2|c43359_g1|c43360_g1|c43366_g1|c43366_g2|c43953_g1|c44736_g1|c44752_g1|c44764_g2|c45654_g1|c45675_g1|c45794_g1|c46177_g1|c46575_g1…	916	3.2e-10	2.3824e-07
GO:0009506	plasmodesma	66	c24994_g1|c32534_g1|c32931_g1|c34000_g1|c34026_g2|c34257_g1|c34634_g1|c34881_g1|c35761_g1|c37172_g1|c37689_g1|c37788_g1|c37888_g1|c38020_g1|c38819_g1|c39489_g1|c39570_g1|c40154_g1|c40443_g1|c40443_g2|c40740_g2|c40986_g1|c41265_g1|c41655_g1|c41782_g2|c42277_g1|c42875_g2|c43359_g1|c43360_g1|c43366_g1|c43366_g2|c43953_g1|c44736_g1|c44752_g1|c44764_g2|c45654_g1|c45675_g1|c45794_g1|c46177_g1|c46575_g1…	916	3.2e-10	2.3824e-07
GO:0048046	apoplast	45	c19633_g1|c32938_g1|c33906_g1|c35599_g1|c35761_g1|c37172_g1|c37611_g1|c37689_g1|c37883_g1|c38031_g1|c39489_g1|c39764_g1|c40491_g1|c40491_g2|c40986_g1|c40999_g1|c41382_g1|c41382_g2|c41782_g2|c42875_g2|c43081_g1|c43225_g1|c43508_g2|c43953_g1|c44571_g1|c44736_g1|c45432_g1|c45588_g1|c45675_g1|c46114_g1|c46883_g1|c47426_g2|c49550_g2|c49836_g1|c50081_g1|c50527_g1|c50873_g2|c51033_g1|c51930_g2|c52006_g1…	511	5.2e-10	2.58093e-07
GO:0005911	cell-cell junction	66	c24994_g1|c32534_g1|c32931_g1|c34000_g1|c34026_g2|c34257_g1|c34634_g1|c34881_g1|c35761_g1|c37172_g1|c37689_g1|c37788_g1|c37888_g1|c38020_g1|c38819_g1|c39489_g1|c39570_g1|c40154_g1|c40443_g1|c40443_g2|c40740_g2|c40986_g1|c41265_g1|c41655_g1|c41782_g2|c42277_g1|c42875_g2|c43359_g1|c43360_g1|c43366_g1|c43366_g2|c43953_g1|c44736_g1|c44752_g1|c44764_g2|c45654_g1|c45675_g1|c45794_g1|c46177_g1|c46575_g1…	1096	3.1e-07	0.000115398
GO:0009505	plant-type cell wall	23	c19633_g1|c34498_g1|c35761_g1|c37611_g1|c38031_g1|c39764_g1|c40122_g1|c40491_g1|c40491_g2|c40999_g1|c43366_g1|c43953_g1|c44485_g1|c46737_g1|c47426_g2|c48691_g1|c50873_g2|c51260_g1|c51260_g2|c52336_g1|c52521_g2|c52809_g1|c52809_g2	220	4.6e-07	0.000136988
GO:0009536	plastid	117	c27866_g1|c31708_g1|c3200_g1|c34364_g1|c34377_g1|c34849_g1|c35072_g1|c35072_g2|c35214_g2|c35631_g1|c36436_g1|c36542_g1|c36593_g1|c37689_g1|c37976_g1|c38306_g1|c38819_g1|c39561_g1|c39686_g1|c40234_g1|c40660_g1|c40867_g1|c40986_g1|c41013_g1|c41263_g1|c41263_g2|c41652_g1|c41876_g2|c41942_g1|c41969_g1|c42875_g2|c43270_g2|c43359_g1|c43508_g2|c43519_g1|c43784_g1|c43784_g2|c43880_g1|c44224_g1|c44563_g1|…	2519	9.4e-06	0.00233277
GO:0009507	chloroplast	111	c27866_g1|c31708_g1|c3200_g1|c34364_g1|c34377_g1|c34849_g1|c35072_g1|c35072_g2|c35214_g2|c35631_g1|c36436_g1|c36542_g1|c36593_g1|c37689_g1|c37976_g1|c38306_g1|c38819_g1|c39561_g1|c39686_g1|c40234_g1|c40660_g1|c40867_g1|c40986_g1|c41013_g1|c41263_g1|c41263_g2|c41652_g1|c41876_g2|c41942_g1|c41969_g1|c42875_g2|c43270_g2|c43359_g1|c43508_g2|c43519_g1|c43784_g1|c43784_g2|c43880_g1|c44224_g1|c44563_g1|…	2411	2.4e-05	0.00510514
GO:0005618	cell wall	54	c19633_g1|c24994_g1|c32938_g1|c34498_g1|c34528_g1|c35599_g1|c35761_g1|c36165_g1|c37611_g1|c38031_g1|c38984_g1|c39670_g1|c39764_g1|c40122_g1|c40491_g1|c40491_g2|c40730_g2|c40999_g1|c41382_g1|c42045_g1|c42875_g2|c43081_g1|c43225_g1|c43359_g1|c43366_g1|c43953_g1|c44485_g1|c44736_g1|c45588_g1|c45613_g1|c46737_g1|c46883_g1|c47406_g1|c47426_g2|c47530_g2|c48058_g1|c48691_g1|c48773_g1|c49405_g3|c49550_g2…	973	3.6e-05	0.00661778
GO:0043231	intracellular membrane-bounded organelle	681	c12193_g1|c13550_g1|c15156_g1|c15439_g1|c15450_g1|c15702_g1|c16994_g1|c17926_g1|c18831_g1|c20519_g1|c21190_g1|c22222_g1|c22377_g1|c23187_g1|c23416_g1|c23724_g1|c25232_g1|c25309_g1|c26255_g1|c26489_g1|c26743_g2|c26747_g1|c27217_g1|c27810_g1|c27866_g1|c28666_g1|c29537_g1|c29658_g1|c30078_g1|c30161_g1|c30459_g1|c30518_g1|c31371_g1|c31381_g1|c31434_g1|c31466_g1|c31529_g1|c31708_g1|c31828_g1|c31855_g1…	19827	4e-05	0.00661778
GO:0043227	membrane-bounded organelle	681	c12193_g1|c13550_g1|c15156_g1|c15439_g1|c15450_g1|c15702_g1|c16994_g1|c17926_g1|c18831_g1|c20519_g1|c21190_g1|c22222_g1|c22377_g1|c23187_g1|c23416_g1|c23724_g1|c25232_g1|c25309_g1|c26255_g1|c26489_g1|c26743_g2|c26747_g1|c27217_g1|c27810_g1|c27866_g1|c28666_g1|c29537_g1|c29658_g1|c30078_g1|c30161_g1|c30459_g1|c30518_g1|c31371_g1|c31381_g1|c31434_g1|c31466_g1|c31529_g1|c31708_g1|c31828_g1|c31855_g1…	19869	5.6e-05	0.0083384
GO:0005576	extracellular region	113	c19633_g1|c22565_g1|c26189_g1|c32938_g1|c33906_g1|c33949_g1|c34498_g1|c34520_g2|c34528_g1|c35421_g1|c35599_g1|c35699_g1|c35761_g1|c36165_g1|c36815_g1|c37172_g1|c37611_g1|c37689_g1|c37883_g1|c38020_g1|c38031_g1|c38568_g1|c38984_g1|c39349_g1|c39489_g1|c39501_g1|c39670_g1|c39764_g1|c40491_g1|c40491_g2|c40505_g1|c40730_g2|c40986_g1|c40999_g1|c41062_g1|c41093_g1|c41212_g1|c41382_g1|c41382_g2|c41387_g2…	2529	6.9e-05	0.00934009
GO:0005802	trans-Golgi network	23	c37008_g1|c39069_g1|c39255_g1|c40244_g1|c41098_g1|c41545_g1|c43759_g1|c46575_g1|c46875_g1|c47344_g1|c47960_g1|c48124_g1|c48441_g2|c48556_g2|c48643_g2|c48648_g5|c50148_g1|c50533_g2|c51196_g2|c51261_g1|c51830_g1|c51848_g1|c52584_g1	307	0.00011	0.0136492
GO:0030054	cell junction	66	c24994_g1|c32534_g1|c32931_g1|c34000_g1|c34026_g2|c34257_g1|c34634_g1|c34881_g1|c35761_g1|c37172_g1|c37689_g1|c37788_g1|c37888_g1|c38020_g1|c38819_g1|c39489_g1|c39570_g1|c40154_g1|c40443_g1|c40443_g2|c40740_g2|c40986_g1|c41265_g1|c41655_g1|c41782_g2|c42277_g1|c42875_g2|c43359_g1|c43360_g1|c43366_g1|c43366_g2|c43953_g1|c44736_g1|c44752_g1|c44764_g2|c45654_g1|c45675_g1|c45794_g1|c46177_g1|c46575_g1…	1357	0.00026	0.02978
GO:0005773	vacuole	75	c23724_g1|c26489_g1|c31434_g1|c32534_g1|c32938_g1|c34634_g1|c35476_g1|c35476_g3|c35621_g1|c35748_g1|c35761_g1|c36868_g1|c37689_g1|c38819_g1|c40122_g1|c40348_g2|c40491_g1|c40491_g2|c40740_g2|c40986_g1|c41545_g1|c41782_g2|c41969_g1|c42000_g1|c42000_g2|c42448_g1|c42807_g1|c43359_g1|c43508_g2|c43880_g1|c43953_g1|c44183_g3|c44485_g1|c44736_g1|c44752_g1|c45433_g3|c45675_g1|c45794_g1|c46048_g1|c46048_g2…	1611	0.00037	0.0393521
