# Supplementary material for: Understanding the response in Pugionium cornutum (L.) Gaertn. seedling leaves under drought stress using transcriptome and proteome integrated analysis
Source: PeerJ. 2023 Apr 3;11:e15165. doi: 10.7717/peerj.15165 (PMC10078451; doi:10.7717/peerj.15165)
Supplement: Supplemental Information 11 [file peerj-11-15165-s011.xlsx]

## Sheet: L2-L1
GO_ID	Term	DPs number	DPs	Annotated proteins	P value	FDR
GO:0009408	response to heat	27	V4LR78, A0A0D3B7Y7, V4KQ28, A0A078C054, R0I6C7, A0A078HNN8, A0A078I437, A0A078DVT2, A0A078GNK2, E4MYB4, D7M4F3, V4MA11, R0GSV2, M4E415, V4LMW1, A0A087GPG1, E4MXN5, R0I205, A0A078DCM0, R0HRD5, D7KLE0, D7KIH9, Q9S9N1, O22809, D7MIF8, D7MDS7, V4KKY6	132	1.6848e-10	3.20617e-07
GO:0000302	response to reactive oxygen species	21	A0A087FY81, V4LR78, D7LF25, A0A078DXE8, A0A078FPP2, A0A0D3CQN5, R0I6C7, A0A078HNN8, D7KLE0, U5IB74, A0A078GNK2, A9Q115, A0A178URS6, A0A078G8S3, D7M4F3, R0GSV2, D7MIF8, A0A087GPG1, A0A0D3AEV6, D7MDS7, R0FGI7	86	6.33595e-10	6.02865e-07
GO:0042542	response to hydrogen peroxide	11	D7M4F3, V4LR78, R0GSV2, A0A087GPG1, D7MDS7, A0A0D3CQN5, R0I6C7, A0A078HNN8, D7KLE0, A0A078GNK2, R0FGI7	28	3.77742e-08	2.39614e-05
GO:0009266	response to temperature stimulus	35	V4LR78, Q9SIN5, A0A0D3B7Y7, V4KQ28, A0A078C054, R0I6C7, A0A078HNN8, A0A078I437, A0A078DVT2, A0A078GNK2, E4MYB4, D7M4F3, V4MA11, R0GSV2, M4E415, V4LMW1, A0A087GPG1, E4MXN5, R0I205, R0FGI7, A0A078DCM0, V4MXR1, R0HRD5, D7KLE0, A0A178VRQ2, D7KIH9, A0A078F758, Q9S9N1, O22809, D7MIF8, V4L1B6, A0A078HQA4, D7MDS7, V4KKY6, V4LGL0	262	5.34534e-08	2.54305e-05
GO:0006880	intracellular sequestering of iron ion	5	A0A087FY81, D7LF25, A0A078FPP2, R0FGI7, A0A178UV43	5	2.90738e-07	6.14749e-05
GO:0004322	ferroxidase activity	5	A0A087FY81, V4KQ77, D7LF25, A0A078FPP2, R0FGI7	5	2.90738e-07	6.14749e-05
GO:0008199	ferric iron binding	5	A0A087FY81, V4KQ77, D7LF25, A0A078FPP2, R0FGI7	5	2.90738e-07	6.14749e-05
GO:0097577	sequestering of iron ion	5	A0A087FY81, D7LF25, A0A078FPP2, R0FGI7, A0A178UV43	5	2.90738e-07	6.14749e-05
GO:0016724	oxidoreductase activity, oxidizing metal ions, oxygen as acceptor	5	A0A087FY81, V4KQ77, D7LF25, A0A078FPP2, R0FGI7	5	2.90738e-07	6.14749e-05
GO:0006879	cellular iron ion homeostasis	6	A0A087FY81, D7LF25, V4KQ77, A0A078FPP2, R0FGI7, A0A178UV43	8	3.65136e-07	6.94854e-05
GO:0006950	response to stress	84	A0A087GRU5, D7LF25, Q9SIN5, A0A078DXE8, A0A0D3B7Y7, A0A078FPP2, V4KQ28, A0A078C054, R0I6C7, A0A078HNN8, V4NYR7, R0G9G5, A0A078I437, A9Q115, V4KJE9, V4MA11, A0A0D3D7X1, R0GSV2, M4E415, R0I5Y8, A0A178WAU5, A0A087GEX4, E4MXN5, R0FGI7, R0INE7, A0A087GEH8, R0I5H3, R0HRD5, A0A0D3CQN5, D7KLE0, A0A087GS72, U5IB74, A0A078F758, O22809, M4F776, V4L1B6, R0FDJ8, D7MDS7, A0A178VQH8, V4KKY6, M4DWQ5, R0HVT6, V4K…	1018	5.63595e-07	9.75019e-05
GO:0006826	iron ion transport	5	A0A087FY81, V4KQ77, D7LF25, A0A078FPP2, R0FGI7	6	1.67342e-06	0.000265377
GO:0006979	response to oxidative stress	29	A0A087GRU5, D7LF25, V4LR78, A0A078DXE8, A0A078FPP2, R0I6C7, A0A078HNN8, A0A078I437, A0A078GNK2, A9Q115, D7M4F3, R0GSV2, A0A0D3AEV6, A0A087GPG1, R0I5Y8, R0FGI7, R0I205, A0A087FY81, D7MV45, A0A0D3CQN5, D7KLE0, U5IB74, A0A178URS6, A0A078G8S3, D7MIF8, V4L1B6, D7MDS7, P00433, V4K9A3	227	2.02964e-06	0.000297109
GO:1901700	response to oxygen-containing compound	42	D7LF25, V4LR78, Q9SIN5, A0A078DXE8, A0A078FPP2, V4NYR7, R0I6C7, A0A078HNN8, A0A078I437, A0A078GNK2, A9Q115, V4KJE9, V4MA11, D7M4F3, R0GSV2, A0A0D3AEV6, A0A087GPG1, Q9ZNZ7, A0A087GGA8, A0A087GEX4, A0A078IRE8, R0FGI7, A0A087FY81, R0INE7, V4MXR1, A0A078JT05, A0A087HIQ4, A0A0D3CQN5, D7KLE0, U5IB74, A0A178URS6, A0A075M3M5, A0A078G8S3, O22809, M4F776, D7MIF8, V4L1B6, A0A078HQA4, D7MDS7, M4DWQ5, A0A087G…	402	2.44807e-06	0.000332763
GO:0055072	iron ion homeostasis	6	A0A087FY81, D7LF25, V4KQ77, A0A078FPP2, R0FGI7, A0A178UV43	11	5.30299e-06	0.000668291
GO:0051238	sequestering of metal ion	5	A0A087FY81, D7LF25, A0A078FPP2, R0FGI7, A0A178UV43	7	5.61884e-06	0.000668291
GO:0010039	response to iron ion	7	A0A087FY81, D7LF25, A0A078FPP2, A0A178URS6, A0A178UV43, R0FGI7, A9Q115	18	1.36715e-05	0.0015304
GO:0009628	response to abiotic stimulus	59	Q9SIN5, O64730, A0A0D3B7Y7, V4KQ28, A0A078C054, R0I6C7, A0A078HNN8, A0A078I437, A9Q115, V4KJE9, V4MA11, R0GSV2, M4E415, A0A178WAU5, A0A087GEX4, E4MXN5, R0FGI7, R0INE7, D7M3Z4, R0HRD5, D7KLE0, A0A087GS72, Q8LCQ4, A0A078F758, O22809, V4L1B6, D7MDS7, A0A178VQH8, V4KKY6, M4DWQ5, B9DGT7, A0A087GZ16, V4LR78, A0A078GNK2, A0A078DVT2, D7KLH0, E4MYB4, D7M4F3, A0A087H5C5, V4LMW1, A0A087GPG1, F4JHS0, Q9ZNZ7,…	699	2.15308e-05	0.00227628
GO:0006875	cellular metal ion homeostasis	8	A0A087FY81, D7LF25, V4KQ77, A0A078FPP2, A0A078I437, A0A178VRQ2, R0FGI7, A0A178UV43	28	4.34706e-05	0.00417669
GO:0046916	cellular transition metal ion homeostasis	7	A0A087FY81, D7LF25, V4KQ77, A0A078FPP2, A0A178VRQ2, R0FGI7, A0A178UV43	21	4.38959e-05	0.00417669
GO:0004738	pyruvate dehydrogenase activity	4	A0A078J089, V4MBI2, A0A087HK48, V4LAE1	6	8.21822e-05	0.00744727
GO:0055076	transition metal ion homeostasis	7	A0A087FY81, D7LF25, V4KQ77, A0A078FPP2, A0A178VRQ2, R0FGI7, A0A178UV43	25	0.000152796	0.0132168
GO:0016722	oxidoreductase activity, oxidizing metal ions	5	A0A087FY81, V4KQ77, D7LF25, A0A078FPP2, R0FGI7	12	0.000172315	0.0142572
GO:0006086	acetyl-CoA biosynthetic process from pyruvate	4	A0A078J089, D7L694, A0A087HK48, V4LAE1	7	0.000184267	0.0146108
GO:0051651	maintenance of location in cell	5	A0A087FY81, D7LF25, A0A078FPP2, R0FGI7, A0A178UV43	14	0.000401121	0.0305333
GO:0055065	metal ion homeostasis	8	A0A087FY81, D7LF25, V4KQ77, A0A078FPP2, A0A078I437, A0A178VRQ2, R0FGI7, A0A178UV43	38	0.000442931	0.0324191
GO:0006085	acetyl-CoA biosynthetic process	5	A0A078J089, D7L694, A0A087HK48, V4LAE1, D7KLH0	15	0.000577439	0.0406988
GO:0009644	response to high light intensity	9	D7M4F3, V4LR78, R0GSV2, D7MDS7, R0I6C7, A0A078HNN8, D7KLE0, A0A078I437, A0A078GNK2	50	0.00066846	0.0454314
GO:0051235	maintenance of location	5	A0A087FY81, D7LF25, A0A078FPP2, R0FGI7, A0A178UV43	16	0.000806111	0.0528975
GO:0010035	response to inorganic substance	39	A0A078J089, D7LF25, V4LR78, A0A078DXE8, A0A078FPP2, R0I6C7, A0A078HNN8, A0A078I437, A0A078DVT2, A0A078GNK2, A9Q115, V4KJE9, V4MA11, D7M4F3, R0GSV2, A0A087H5C5, M4D7S0, A0A087GPG1, R0I5Y8, A0A087GGA8, A0A087GEX4, R0FGI7, A0A087FY81, R0INE7, A0A178VP87, D7MV68, A0A0D3CQN5, D7KLE0, A0A087GS72, U5IB74, A0A178URS6, A0A178UV43, A0A075M3M5, A0A078G8S3, O22809, D7MDS7, A0A178VQH8, B9DGT7, V4K9A3	471	0.00092084	0.058412
GO:0004739	pyruvate dehydrogenase (acetyl-transferring) activity	3	A0A078J089, A0A087HK48, V4LAE1	5	0.00112047	0.0649062
GO:0035383	thioester metabolic process	6	A0A078J089, D7L694, V4MBI2, A0A087HK48, V4LAE1, D7KLH0	25	0.00112554	0.0649062
GO:0006637	acyl-CoA metabolic process	6	A0A078J089, D7L694, V4MBI2, A0A087HK48, V4LAE1, D7KLH0	25	0.00112554	0.0649062
GO:0042221	response to chemical	68	A0A087GRU5, A0A078J089, D7LF25, A0A078DXE8, Q9SIN5, D7L598, A0A078FPP2, R0I6C7, A0A078HNN8, V4NYR7, A0A078I437, A9Q115, V4KJE9, V4MA11, A0A0D3D7X1, R0GSV2, M4D7S0, R0I5Y8, A0A087GEX4, E4MXN5, R0FGI7, R0INE7, V4KQ77, F4HXZ3, D7MV68, A0A0D3CQN5, A0A087HIQ4, D7KLE0, A0A087GS72, U5IB74, A0A178UV43, O22809, M4F776, V4L1B6, R0FDJ8, D7MDS7, A0A178VQH8, M4DWQ5, B9DGT7, V4K9A3, A0A087GZ16, D7LTD9, V4LR78,…	971	0.00143619	0.0803846
GO:0044550	secondary metabolite biosynthetic process	11	V4MA11, V4L9M5, D7LJX7, O22809, V4L1B6, D7MV68, F4JHS0, V4MBI2, R0HVT6, Q8LFU3, Q9LQ26	80	0.00182218	0.0976048
GO:0006084	acetyl-CoA metabolic process	5	A0A078J089, D7L694, A0A087HK48, V4LAE1, D7KLH0	19	0.00189773	0.0976048
GO:0000041	transition metal ion transport	5	A0A087FY81, V4KQ77, D7LF25, A0A078FPP2, R0FGI7	19	0.00189773	0.0976048
GO:0050896	response to stimulus	106	A0A078J089, D7LF25, Q9SIN5, D7L598, A0A0D3B7Y7, V4KQ28, A0A078C054, V4NYR7, A0A078I437, A9Q115, V4KJE9, R0GSV2, E4MXN5, A0A087GEX4, R0FGI7, R0INE7, A0A087GEH8, D7M3Z4, D7MV68, U5IB74, Q8LCQ4, M4F776, V4L1B6, R0FDJ8, D7MDS7, V4KKY6, B9DGT7, A0A087GZ16, V4LR78, A0A178VMR4, A0A078DVT2, A0A078GNK2, E4MYB4, D7M4F3, A0A178VY01, V4LMW1, A0A087GPG1, A0A0D3AEV6, R0I205, A0A078IRE8, A0A078DCM0, V4MXR1, A0A…	1677	0.00212717	0.0992226
GO:0051275	beta-glucan catabolic process	3	A0A078H9S8, V4JQT7, A0A178URS6	6	0.00215875	0.0992226
GO:0030245	cellulose catabolic process	3	A0A078H9S8, V4JQT7, A0A178URS6	6	0.00215875	0.0992226
GO:0030003	cellular cation homeostasis	8	A0A087FY81, D7LF25, V4KQ77, A0A078FPP2, A0A078I437, A0A178VRQ2, R0FGI7, A0A178UV43	48	0.00221893	0.0992226
GO:0035384	thioester biosynthetic process	5	A0A078J089, D7L694, A0A087HK48, V4LAE1, D7KLH0	20	0.00242898	0.0992226
GO:0071616	acyl-CoA biosynthetic process	5	A0A078J089, D7L694, A0A087HK48, V4LAE1, D7KLH0	20	0.00242898	0.0992226
GO:0016621	cinnamoyl-CoA reductase activity	2	V4MA11, O22809	2	0.00245058	0.0992226
GO:0005950	anthranilate synthase complex	2	R0FDJ8, A0A178WJZ1	2	0.00245058	0.0992226
GO:0009374	biotin binding	2	V4KUK0, G4WXD8	2	0.00245058	0.0992226
GO:0004049	anthranilate synthase activity	2	R0FDJ8, A0A178WJZ1	2	0.00245058	0.0992226
GO:0006873	cellular ion homeostasis	8	A0A087FY81, D7LF25, V4KQ77, A0A078FPP2, A0A078I437, A0A178VRQ2, R0FGI7, A0A178UV43	50	0.00289667	0.114841
GO:0055082	cellular chemical homeostasis	9	A0A087FY81, D7LF25, V4KQ77, A0A078FPP2, A0A078I437, A0A178VRQ2, A0A087GGA8, R0FGI7, A0A178UV43	66	0.00492398	0.191231
GO:0000272	polysaccharide catabolic process	9	V4LT85, O22256, A0A178V6J6, A0A078GRZ7, V4LKQ8, A0A078H9S8, R0EVU0, V4JQT7, A0A178URS6	67	0.00544706	0.205337
GO:0003959	NADPH dehydrogenase activity	3	A0A087GEH8, A0A0D3D7X1, A0A078DXE8	8	0.0056109	0.205337
GO:0016624	oxidoreductase activity, acting on the aldehyde or oxo group of donors, disulfide as acceptor	3	A0A078J089, A0A087HK48, V4LAE1	8	0.0056109	0.205337
GO:0009642	response to light intensity	10	D7M4F3, V4LR78, R0GSV2, D7MDS7, R0I6C7, A0A078HNN8, D7KLE0, A0A078I437, A0A078GNK2, A9Q115	80	0.00583865	0.20964
GO:0016491	response to light intensity	60	A0A087GRU5, A0A078J089, D7LF25, A0A078CGS5, A0A078DXE8, D7L598, A0A078FPP2, V4NYR7, V4JR39, Q8LFU3, A9Q115, V4KJE9, V4L9M5, A0A0D3D7X1, V4MA11, A0A0D2ZX28, R0I5Y8, V4LAE1, M4EEC8, R0FGI7, R0INE7, A0A087GEH8, Q3ZVC8, V4KQ77, F4HXZ3, U5IB74, A0A087HK48, R0GFS8, O22809, A0A0D3AG00, V4MBI2, A0A078CZL5, V4K9A3, A0A087GZ16, A0A087G4X8, D7LKW5, R0F4J2, A0A0D3C6F4, A0A178VYZ1, D7L694, A0A087GFX9, A0A078I…	886	0.00612588	0.215881
GO:0055080	cation homeostasis	8	A0A087FY81, D7LF25, V4KQ77, A0A078FPP2, A0A078I437, A0A178VRQ2, R0FGI7, A0A178UV43	57	0.00660269	0.228453
GO:0016833	oxo-acid-lyase activity	3	D7MNW6, R0FDJ8, A0A178WJZ1	9	0.00811001	0.266886
GO:0046685	response to arsenic-containing substance	3	R0F4J2, D7L694, E4MXN5	9	0.00811001	0.266886
GO:0015994	chlorophyll metabolic process	8	A0A087GKB9, V4L870, A0A087G4X8, D7LYF5, V4JR39, V4LP72, A0A0D3BFD9, D7KLH0	59	0.00813422	0.266886
GO:0016903	oxidoreductase activity, acting on the aldehyde or oxo group of donors	9	R0INE7, V4KJE9, A0A078J089, V4MA11, O22809, V4MBI2, A0A087HK48, V4LAE1, A0A087GZ16	73	0.00954373	0.307826
GO:0019748	secondary metabolic process	14	D7LJX7, V4P9U3, D7MV68, R0ETD5, Q8LFU3, Q9LQ26, V4L9M5, V4MA11, O22809, V4L1B6, F4JHS0, V4LGL0, R0HVT6, V4MBI2	141	0.0098256	0.309411
GO:0098771	inorganic ion homeostasis	8	A0A087FY81, D7LF25, V4KQ77, A0A078FPP2, A0A078I437, A0A178VRQ2, R0FGI7, A0A178UV43	61	0.00991805	0.309411
GO:0015995	chlorophyll biosynthetic process	6	V4L870, D7LYF5, V4JR39, V4LP72, A0A0D3BFD9, D7KLH0	38	0.0102053	0.313237
GO:0071241	cellular response to inorganic substance	3	A0A178URS6, A0A178UV43, A9Q115	10	0.0111651	0.331988
GO:0071248	cellular response to metal ion	3	A0A178URS6, A0A178UV43, A9Q115	10	0.0111651	0.331988
GO:0046885	regulation of hormone biosynthetic process	2	R0FDJ8, A0A178WJZ1	4	0.0137551	0.368676
GO:0009539	photosystem II reaction center	2	A0A175DDT6, A4QJL4	4	0.0137551	0.368676
GO:0010600	regulation of auxin biosynthetic process	2	R0FDJ8, A0A178WJZ1	4	0.0137551	0.368676
GO:0090354	regulation of auxin metabolic process	2	R0FDJ8, A0A178WJZ1	4	0.0137551	0.368676
GO:0032350	regulation of hormone metabolic process	2	R0FDJ8, A0A178WJZ1	4	0.0137551	0.368676
GO:0030026	cellular manganese ion homeostasis	2	A0A178VRQ2, A0A178UV43	4	0.0137551	0.368676
GO:0055071	manganese ion homeostasis	2	A0A178VRQ2, A0A178UV43	4	0.0137551	0.368676
GO:0009753	response to jasmonic acid	6	A0A078HQA4, A0A078JT05, V4NYR7, M4DWQ5, A0A078IRE8, A0A087HRE3	41	0.0146834	0.38809
GO:0050801	ion homeostasis	8	A0A087FY81, D7LF25, V4KQ77, A0A078FPP2, A0A078I437, A0A178VRQ2, R0FGI7, A0A178UV43	66	0.0156338	0.391601
GO:0006778	porphyrin-containing compound metabolic process	8	A0A087GKB9, V4L870, A0A087G4X8, D7LYF5, V4JR39, V4LP72, A0A0D3BFD9, D7KLH0	66	0.0156338	0.391601
GO:0019725	cellular homeostasis	15	A0A087FY81, D7LF25, V4KQ77, R0F4J2, D7L598, A0A078FPP2, D7L694, A0A078I437, A0A178VRQ2, A0A178UV43, A0A078FU68, A0A087GFX9, A0A087GPG1, A0A087GGA8, R0FGI7	164	0.015654	0.391601
GO:0030312	external encapsulating structure	31	O22256, O24335, A0A087HKF2, R0G9G5, V4L5K5, E4MYB4, A0A178VY01, A0A078G2D0, D7M3J2, A0A087GPG1, E4MXN5, A0A087GEX4, A0A078CI95, V4LT85, A0A078GRZ7, V4LKQ8, D7M3Z4, R0HB45, A0A087HIQ4, A0A087GS72, D7M9X2, A0A075M3M5, A0A0D3BRZ5, Q9S9N1, R0EVU0, D7LZC0, P00433, M4DWQ5, R0G8R2, B9DGT7, A0A087HRE3	420	0.0158451	0.391601
GO:0005618	cell wall	31	O22256, O24335, A0A087HKF2, R0G9G5, V4L5K5, E4MYB4, A0A078G2D0, A0A178VY01, D7M3J2, A0A087GPG1, E4MXN5, A0A087GEX4, A0A078CI95, V4LT85, A0A078GRZ7, V4LKQ8, D7M3Z4, R0HB45, A0A087HIQ4, A0A087GS72, D7M9X2, A0A075M3M5, A0A0D3BRZ5, Q9S9N1, R0EVU0, P00433, D7LZC0, M4DWQ5, R0G8R2, B9DGT7, A0A087HRE3	420	0.0158451	0.391601
GO:0052689	carboxylic ester hydrolase activity	9	V4LT85, O22256, D7KJB1, A0A078GRZ7, A0A087H5E9, A0A087G8N1, D7LQI9, D7M346, A0A178VCR4	80	0.0168689	0.411558
GO:0033013	tetrapyrrole metabolic process	8	A0A087GKB9, V4L870, A0A087G4X8, D7LYF5, V4JR39, V4LP72, A0A0D3BFD9, D7KLH0	68	0.0184821	0.43327
GO:0009314	response to radiation	19	R0IG50, V4LR78, O64730, R0I6C7, A0A078HNN8, D7KLE0, A0A078I437, A0A078GNK2, D7KLH0, A9Q115, Q8LCQ4, A0A078F758, A0A078G8S3, D7M4F3, R0GSV2, V4L1B6, P00433, D7MDS7, Q9ZNZ7	229	0.0185473	0.43327
GO:0009416	response to light stimulus	19	R0IG50, V4LR78, O64730, R0I6C7, A0A078HNN8, D7KLE0, A0A078I437, A0A078GNK2, D7KLH0, A9Q115, Q8LCQ4, A0A078F758, A0A078G8S3, D7M4F3, R0GSV2, V4L1B6, D7MDS7, P00433, Q9ZNZ7	229	0.0185473	0.43327
GO:0001101	response to acid chemical	23	R0INE7, A0A078DXE8, Q9SIN5, V4MXR1, A0A078JT05, A0A087HIQ4, V4NYR7, A0A078I437, A9Q115, V4KJE9, A0A075M3M5, A0A078G8S3, V4MA11, O22809, M4F776, V4L1B6, A0A078HQA4, M4DWQ5, A0A087GGA8, A0A087GEX4, A0A078IRE8, A0A087HRE3, A0A087GZ16	293	0.0186696	0.43327
GO:0006779	porphyrin-containing compound biosynthetic process	6	V4L870, D7LYF5, V4JR39, V4LP72, A0A0D3BFD9, D7KLH0	44	0.0203726	0.436779
GO:0030001	metal ion transport	7	A0A087FY81, A0A078DLK4, V4KQ77, D7LF25, A0A078FPP2, A0A178VRQ2, R0FGI7	57	0.0216386	0.436779
GO:0009699	phenylpropanoid biosynthetic process	5	V4MA11, O22809, F4JHS0, V4MBI2, R0HVT6	34	0.0247422	0.436779
GO:0005976	polysaccharide metabolic process	13	V4LT85, O22256, A0A178V6J6, A0A078GRZ7, V4LKQ8, V4JQT7, A0A078HL16, D7KLH0, A0A178URS6, A0A078H9S8, R0EVU0, R0HVT6, A0A087GEX4	144	0.0258895	0.436779
GO:0033014	tetrapyrrole biosynthetic process	6	V4L870, D7LYF5, V4JR39, V4LP72, A0A0D3BFD9, D7KLH0	47	0.0273988	0.436779
GO:0009611	response to wounding	7	A0A078G8S3, V4L1B6, A0A078HQA4, R0FDJ8, A0A078JT05, V4NYR7, A0A078IRE8	60	0.0278879	0.436779
GO:0030243	cellulose metabolic process	4	A0A078H9S8, V4JQT7, R0HVT6, A0A178URS6	24	0.0287142	0.436779
GO:0010224	response to UV-B	3	A0A078G8S3, V4L1B6, A9Q115	14	0.0292399	0.436779
GO:0051707	response to other organism	22	V4LT85, A0A087GEH8, Q9SIN5, A0A078DXE8, A0A078JT05, Q42335, D7M9X2, A9Q115, A0A0D3BRZ5, A0A087GKB9, E4MYB4, A0A0D3D7X1, Q9S9N1, A0A178VY01, V4L1B6, R0FDJ8, A0A087GPG1, P00433, A0A178WJZ1, V4LGL0, E4MXN5, R0FGI7	290	0.0297963	0.436779
GO:0009607	response to biotic stimulus	23	A0A087HQR6, V4LT85, A0A087GEH8, Q9SIN5, A0A078DXE8, Q42335, A0A078JT05, D7M9X2, A9Q115, A0A0D3BRZ5, A0A087GKB9, E4MYB4, A0A0D3D7X1, Q9S9N1, A0A178VY01, V4L1B6, R0FDJ8, A0A087GPG1, P00433, A0A178WJZ1, V4LGL0, E4MXN5, R0FGI7	307	0.0302643	0.436779
GO:0005506	iron ion binding	9	A0A087FY81, A0A175DDT6, V4L9M5, V4KQ77, D7LF25, R0G495, A0A0D3C6F4, A0A078FPP2, R0FGI7	89	0.031458	0.436779
GO:0043207	response to external biotic stimulus	22	V4LT85, A0A087GEH8, Q9SIN5, A0A078DXE8, Q42335, A0A078JT05, D7M9X2, A9Q115, A0A0D3BRZ5, A0A087GKB9, E4MYB4, A0A0D3D7X1, Q9S9N1, A0A178VY01, V4L1B6, R0FDJ8, A0A087GPG1, P00433, A0A178WJZ1, V4LGL0, E4MXN5, R0FGI7	292	0.0318585	0.436779
GO:0008810	cellulase activity	2	A0A078H9S8, V4JQT7	6	0.0321879	0.436779
GO:0003861	3-isopropylmalate dehydratase activity	2	D7LJX7, D7MV68	6	0.0321879	0.436779
GO:0009809	lignin biosynthetic process	4	V4MA11, O22809, F4JHS0, R0HVT6	25	0.0328901	0.436779
GO:0015979	photosynthesis	21	A0A087FY81, A0A087GEH8, A0A175DDT6, Q3ZVC8, M4EHZ1, R0IG50, V4L870, D7LF25, A0A078FPP2, V4JR39, Q8LCQ4, A0A075M3M5, R0GFS8, A0A087H5C5, A0A087GI99, A0A0D3A7X4, A4QJL4, A0A178VQH8, V4LP72, V4NDH1, R0FGI7	277	0.0335059	0.436779
GO:0009251	glucan catabolic process	4	A0A178V6J6, A0A078H9S8, V4JQT7, A0A178URS6	26	0.0374022	0.436779
GO:0044247	cellular polysaccharide catabolic process	4	A0A178V6J6, A0A078H9S8, V4JQT7, A0A178URS6	26	0.0374022	0.436779
GO:0009073	aromatic amino acid family biosynthetic process	5	A0A087GEG9, D7MNW6, R0FDJ8, A0A178WJZ1, A0A078FM14	38	0.0380432	0.436779
GO:0016627	oxidoreductase activity, acting on the CH-CH group of donors	7	A0A087GKB9, A0A078IPM7, A0A0D2ZX28, A0A078DXE8, D7LYF5, V4JR39, V4MBI2	65	0.0408346	0.436779
GO:0048584	positive regulation of response to stimulus	5	V4L1B6, A0A178VMR4, A0A078JT05, P00433, A0A078I437	39	0.0419361	0.436779
GO:0034614	cellular response to reactive oxygen species	4	A0A0D3CQN5, U5IB74, A9Q115, A0A178URS6	27	0.0422521	0.436779
GO:0009411	response to UV	4	A0A078G8S3, V4L1B6, D7KLH0, A9Q115	27	0.0422521	0.436779
GO:0080134	regulation of response to stress	6	A0A087GKB9, V4L1B6, A0A078JT05, P00433, V4LGL0, A0A078I437	52	0.0423526	0.436779
GO:0047484	regulation of response to osmotic stress	2	V4L1B6, A0A078I437	7	0.0436073	0.436779
GO:0030613	oxidoreductase activity, acting on phosphorus or arsenic in donors	2	A0A078FU68, D7L598	7	0.0436073	0.436779
GO:0030614	oxidoreductase activity, acting on phosphorus or arsenic in donors, disulfide as acceptor	2	A0A078FU68, D7L598	7	0.0436073	0.436779
GO:0004148	dihydrolipoyl dehydrogenase activity	2	R0F4J2, D7L694	7	0.0436073	0.436779
GO:0009317	acetyl-CoA carboxylase complex	2	V4KUK0, G4WXD8	7	0.0436073	0.436779
GO:0008794	arsenate reductase (glutaredoxin) activity	2	A0A078FU68, D7L598	7	0.0436073	0.436779
GO:0071281	cellular response to iron ion	2	A0A178URS6, A0A178UV43	7	0.0436073	0.436779
GO:0004802	transketolase activity	2	A0A087H5C5, A0A178VQH8	7	0.0436073	0.436779
GO:0055083	monovalent inorganic anion homeostasis	2	A0A078I437, A0A178VRQ2	7	0.0436073	0.436779
GO:0015298	solute:cation antiporter activity	2	A0A078DLK4, A0A178VRQ2	7	0.0436073	0.436779
GO:0015299	solute:proton antiporter activity	2	A0A078DLK4, A0A178VRQ2	7	0.0436073	0.436779
GO:0009808	lignin metabolic process	4	V4MA11, O22809, F4JHS0, R0HVT6	28	0.04744	0.436779
GO:0016628	oxidoreductase activity, acting on the CH-CH group of donors, NAD or NADP as acceptor	4	A0A078IPM7, A0A078DXE8, D7LYF5, V4JR39	28	0.04744	0.436779
GO:0005528	FK506 binding	3	R0GFS8, A0A178UA59, V4NDH1	17	0.0489766	0.436779
GO:0008187	poly-pyrimidine tract binding	3	A0A087GEH8, A0A0D3D7X1, D7LTD9	17	0.0489766	0.436779
GO:0005527	macrolide binding	3	R0GFS8, A0A178UA59, V4NDH1	17	0.0489766	0.436779
GO:0008266	poly(U) RNA binding	3	A0A087GEH8, A0A0D3D7X1, D7LTD9	17	0.0489766	0.436779
GO:0010193	response to ozone	3	A0A078G8S3, A0A078DXE8, A9Q115	17	0.0489766	0.436779
GO:0043335	protein unfolding	1	R0I6C7	1	0.0495766	0.436779
GO:0005720	nuclear heterochromatin	1	A0A178VMR4	1	0.0495766	0.436779
GO:0051139	metal ion:proton antiporter activity	1	A0A178VRQ2	1	0.0495766	0.436779
GO:0046510	UDP-sulfoquinovose:DAG sulfoquinovosyltransferase activity	1	A0A178UMQ8	1	0.0495766	0.436779
GO:1904963	regulation of phytol biosynthetic process	1	V4L870	1	0.0495766	0.436779
GO:0034602	oxoglutarate dehydrogenase (NAD+) activity	1	V4MBI2	1	0.0495766	0.436779
GO:0046423	allene-oxide cyclase activity	1	R0IJD7	1	0.0495766	0.436779
GO:0090308	regulation of methylation-dependent chromatin silencing	1	A0A178VMR4	1	0.0495766	0.436779
GO:0000347	THO complex	1	R0HNM9	1	0.0495766	0.436779
GO:0000346	transcription export complex	1	R0HNM9	1	0.0495766	0.436779
GO:0018475	trans-2-methyl-5-isopropylhexa-2,5-dienal dehydrogenase activity	1	V4MBI2	1	0.0495766	0.436779
GO:0033520	phytol biosynthetic process	1	V4L870	1	0.0495766	0.436779
GO:0001078	transcriptional repressor activity, RNA polymerase II core promoter proximal region sequence-specific binding	1	M4CP65	1	0.0495766	0.436779
GO:2000468	regulation of peroxidase activity	1	A0A178VMR4	1	0.0495766	0.436779
GO:0000987	core promoter proximal region sequence-specific DNA binding	1	M4CP65	1	0.0495766	0.436779
GO:0072349	modified amino acid transmembrane transporter activity	1	D7M8K0	1	0.0495766	0.436779
GO:0043473	pigmentation	1	D7KLH0	1	0.0495766	0.436779
GO:0034832	geranial dehydrogenase activity	1	V4MBI2	1	0.0495766	0.436779
GO:0043745	N2-acetyl-L-aminoadipate semialdehyde dehydrogenase activity	1	V4MBI2	1	0.0495766	0.436779
GO:1902932	positive regulation of alcohol biosynthetic process	1	V4L870	1	0.0495766	0.436779
GO:0008716	D-alanine-D-alanine ligase activity	1	A0A178VHR6	1	0.0495766	0.436779
GO:0030371	translation repressor activity	1	M4CP65	1	0.0495766	0.436779
GO:0035336	long-chain fatty-acyl-CoA metabolic process	1	V4MBI2	1	0.0495766	0.436779
GO:0001227	transcriptional repressor activity, RNA polymerase II transcription regulatory region sequence-specific binding	1	M4CP65	1	0.0495766	0.436779
GO:0018473	cis-2-methyl-5-isopropylhexa-2,5-dienal dehydrogenase activity	1	V4MBI2	1	0.0495766	0.436779
GO:0047810	D-alanine:2-oxoglutarate aminotransferase activity	1	D7MNW6	1	0.0495766	0.436779
GO:0035337	fatty-acyl-CoA metabolic process	1	V4MBI2	1	0.0495766	0.436779
GO:0051365	cellular response to potassium ion starvation	1	M4F776	1	0.0495766	0.436779
GO:0031221	arabinan metabolic process	1	R0EVU0	1	0.0495766	0.436779
GO:0015368	calcium:cation antiporter activity	1	A0A178VRQ2	1	0.0495766	0.436779
GO:0034525	1-naphthaldehyde dehydrogenase activity	1	V4MBI2	1	0.0495766	0.436779
GO:0034530	4-hydroxymethylsalicyaldehyde dehydrogenase activity	1	V4MBI2	1	0.0495766	0.436779
GO:0005381	iron ion transmembrane transporter activity	1	A0A178UV43	1	0.0495766	0.436779
GO:0018474	2-carboxybenzaldehyde dehydrogenase activity	1	V4MBI2	1	0.0495766	0.436779
GO:0043878	glyceraldehyde-3-phosphate dehydrogenase (NAD+) (non-phosphorylating) activity	1	V4MBI2	1	0.0495766	0.436779
GO:0034309	primary alcohol biosynthetic process	1	V4L870	1	0.0495766	0.436779
GO:1903175	fatty alcohol biosynthetic process	1	V4L870	1	0.0495766	0.436779
GO:0034603	pyruvate dehydrogenase [NAD(P)+] activity	1	V4MBI2	1	0.0495766	0.436779
GO:0000978	RNA polymerase II core promoter proximal region sequence-specific DNA binding	1	M4CP65	1	0.0495766	0.436779
GO:0050486	intramolecular transferase activity, transferring hydroxy groups	1	D7MV68	1	0.0495766	0.436779
GO:0000095	S-adenosyl-L-methionine transmembrane transporter activity	1	D7M8K0	1	0.0495766	0.436779
GO:0001159	core promoter proximal region DNA binding	1	M4CP65	1	0.0495766	0.436779
GO:0031935	regulation of chromatin silencing	1	A0A178VMR4	1	0.0495766	0.436779
GO:0008696	4-amino-4-deoxychorismate lyase activity	1	D7MNW6	1	0.0495766	0.436779
GO:0034604	pyruvate dehydrogenase (NAD+) activity	1	V4MBI2	1	0.0495766	0.436779
GO:0046564	oxalate decarboxylase activity	1	A0A087HKF2	1	0.0495766	0.436779
GO:1902551	regulation of catalase activity	1	A0A178VMR4	1	0.0495766	0.436779
GO:0043478	pigment accumulation in response to UV light	1	D7KLH0	1	0.0495766	0.436779
GO:1902275	regulation of chromatin organization	1	A0A178VMR4	1	0.0495766	0.436779
GO:2000470	positive regulation of peroxidase activity	1	A0A178VMR4	1	0.0495766	0.436779
GO:0080123	jasmonate-amino synthetase activity	1	A0A078JT05	1	0.0495766	0.436779
GO:0051182	coenzyme transport	1	D7M8K0	1	0.0495766	0.436779
GO:0045793	positive regulation of cell size	1	D7KLH0	1	0.0495766	0.436779
GO:0045182	translation regulator activity	1	M4CP65	1	0.0495766	0.436779
GO:0043796	glyceraldehyde dehydrogenase (NADP) activity	1	V4MBI2	1	0.0495766	0.436779
GO:1902553	positive regulation of catalase activity	1	A0A178VMR4	1	0.0495766	0.436779
GO:0000982	transcription factor activity, RNA polymerase II core promoter proximal region sequence-specific binding	1	M4CP65	1	0.0495766	0.436779
GO:0052722	fatty acid in-chain hydroxylase activity	1	V4L9M5	1	0.0495766	0.436779
GO:0034601	oxoglutarate dehydrogenase [NAD(P)+] activity	1	V4MBI2	1	0.0495766	0.436779
GO:0010216	maintenance of DNA methylation	1	A0A178VMR4	1	0.0495766	0.436779
GO:0015369	calcium:proton antiporter activity	1	A0A178VRQ2	1	0.0495766	0.436779
GO:0000445	THO complex part of transcription export complex	1	R0HNM9	1	0.0495766	0.436779
GO:0000169	activation of MAPK activity involved in osmosensory signaling pathway	1	V4L1B6	1	0.0495766	0.436779
GO:0043870	N-acetyl-gamma-aminoadipyl-phosphate reductase activity	1	V4MBI2	1	0.0495766	0.436779
GO:0034822	citronellal dehydrogenase activity	1	V4MBI2	1	0.0495766	0.436779
GO:0052814	medium-chain-aldehyde dehydrogenase activity	1	V4MBI2	1	0.0495766	0.436779
GO:0018472	1-hydroxy-2-naphthaldehyde dehydrogenase activity	1	V4MBI2	1	0.0495766	0.436779
GO:0034425	etioplast envelope	1	A0A078HQA4	1	0.0495766	0.436779
GO:0044104	2,5-dioxovalerate dehydrogenase (NAD+) activity	1	V4MBI2	1	0.0495766	0.436779
GO:0080019	fatty-acyl-CoA reductase (alcohol-forming) activity	1	V4MBI2	1	0.0495766	0.436779
GO:0046136	positive regulation of vitamin metabolic process	1	V4L870	1	0.0495766	0.436779
GO:0043480	pigment accumulation in tissues	1	D7KLH0	1	0.0495766	0.436779
GO:0019115	benzaldehyde dehydrogenase activity	1	V4MBI2	1	0.0495766	0.436779
GO:0004640	phosphoribosylanthranilate isomerase activity	1	A0A078FM14	1	0.0495766	0.436779
GO:0031222	arabinan catabolic process	1	R0EVU0	1	0.0495766	0.436779
GO:0034520	2-naphthaldehyde dehydrogenase activity	1	V4MBI2	1	0.0495766	0.436779
GO:1904965	regulation of vitamin E biosynthetic process	1	V4L870	1	0.0495766	0.436779
GO:0002215	defense response to nematode	1	D7M9X2	1	0.0495766	0.436779
GO:0034538	3-methylsalicylaldehyde dehydrogenase activity	1	V4MBI2	1	0.0495766	0.436779
GO:0043481	anthocyanin accumulation in tissues in response to UV light	1	D7KLH0	1	0.0495766	0.436779
GO:0003333	amino acid transmembrane transport	1	A0A078HQA4	1	0.0495766	0.436779
GO:0034426	etioplast membrane	1	A0A078HQA4	1	0.0495766	0.436779
GO:0033728	divinyl chlorophyllide a 8-vinyl-reductase activity	1	D7LYF5	1	0.0495766	0.436779
GO:0043476	pigment accumulation	1	D7KLH0	1	0.0495766	0.436779
GO:1904964	positive regulation of phytol biosynthetic process	1	V4L870	1	0.0495766	0.436779
GO:0051744	3,8-divinyl protochlorophyllide a 8-vinyl reductase activity	1	D7LYF5	1	0.0495766	0.436779
GO:0050515	4-(cytidine 5'-diphospho)-2-C-methyl-D-erythritol kinase activity	1	D7LFE3	1	0.0495766	0.436779
GO:0043479	pigment accumulation in tissues in response to UV light	1	D7KLH0	1	0.0495766	0.436779
GO:0033044	regulation of chromosome organization	1	A0A178VMR4	1	0.0495766	0.436779
GO:0051185	coenzyme transporter activity	1	D7M8K0	1	0.0495766	0.436779
GO:0015805	S-adenosyl-L-methionine transport	1	D7M8K0	1	0.0495766	0.436779
GO:1904966	positive regulation of vitamin E biosynthetic process	1	V4L870	1	0.0495766	0.436779
GO:0048878	chemical homeostasis	9	A0A087FY81, D7LF25, V4KQ77, A0A078FPP2, A0A078I437, A0A178VRQ2, A0A087GGA8, R0FGI7, A0A178UV43	97	0.0503332	0.441401
GO:0051273	beta-glucan metabolic process	4	A0A078H9S8, V4JQT7, R0HVT6, A0A178URS6	29	0.0529647	0.457438
GO:0070001	aspartic-type peptidase activity	4	A0A078K0T5, A0A078G2D0, D6PRM6, E4MY49	29	0.0529647	0.457438
GO:0004190	aspartic-type endopeptidase activity	4	A0A078K0T5, A0A078G2D0, D6PRM6, E4MY49	29	0.0529647	0.457438
GO:0009620	response to fungus	9	A0A0D3BRZ5, A0A0D3D7X1, A0A178VY01, Q9SIN5, A0A078DXE8, A0A087GPG1, P00433, V4LGL0, D7M9X2	98	0.0531234	0.457438
GO:0016052	carbohydrate catabolic process	13	A0A078J089, V4LT85, O22256, A0A178V6J6, A0A078GRZ7, V4LKQ8, V4JQT7, A0A087GS72, A0A087HK48, A0A178URS6, A0A078H9S8, R0EVU0, V4LAE1	160	0.0535515	0.459048
GO:0009725	response to hormone	30	D7LTD9, Q9SIN5, D7L598, V4NYR7, A0A078I437, V4KJE9, A0A0D3D7X1, V4MA11, A0A087GPG1, A0A078IRE8, R0FGI7, R0INE7, F4HXZ3, V4MXR1, A0A078JT05, A0A087HIQ4, A0A087GS72, A0A178URS6, A0A075M3M5, O22809, M4F776, V4L1B6, A0A078HQA4, R0FDJ8, P00433, A0A178WJZ1, M4DWQ5, V4LGL0, A0A087HRE3, A0A087GZ16	448	0.0545328	0.462961
GO:0030611	arsenate reductase activity	2	A0A078FU68, D7L598	8	0.0562727	0.462961
GO:0010025	wax biosynthetic process	2	V4MBI2, D7KLH0	8	0.0562727	0.462961
GO:0010166	wax metabolic process	2	V4MBI2, D7KLH0	8	0.0562727	0.462961
GO:0010168	ER body	2	V4LGL0, A0A178UV43	8	0.0562727	0.462961
GO:0010189	vitamin E biosynthetic process	2	V4L870, V4JR39	8	0.0562727	0.462961
GO:0017057	6-phosphogluconolactonase activity	2	D7M346, A0A178VCR4	8	0.0562727	0.462961
GO:0042360	vitamin E metabolic process	2	V4L870, V4JR39	8	0.0562727	0.462961
GO:0000162	tryptophan biosynthetic process	3	R0FDJ8, A0A178WJZ1, A0A078FM14	18	0.0566841	0.462961
GO:0046219	indolalkylamine biosynthetic process	3	R0FDJ8, A0A178WJZ1, A0A078FM14	18	0.0566841	0.462961
GO:0045330	aspartyl esterase activity	3	V4LT85, O22256, A0A078GRZ7	18	0.0566841	0.462961
GO:0048366	leaf development	7	A0A087FY81, O24335, D7LF25, Q9SIN5, A0A078FPP2, R0FGI7, D7KLH0	70	0.0571761	0.464961
GO:0009908	flower development	6	A0A087FY81, D7LF25, V4L1B6, A0A078FPP2, D7KLH0, R0FGI7	56	0.0574177	0.464961
GO:0009698	phenylpropanoid metabolic process	5	V4MA11, O22809, F4JHS0, V4MBI2, R0HVT6	43	0.0598366	0.481204
GO:0009719	response to endogenous stimulus	30	D7LTD9, Q9SIN5, D7L598, V4NYR7, A0A078I437, V4KJE9, A0A0D3D7X1, V4MA11, A0A087GPG1, A0A078IRE8, R0FGI7, R0INE7, F4HXZ3, V4MXR1, A0A078JT05, A0A087HIQ4, A0A087GS72, A0A178URS6, A0A075M3M5, O22809, M4F776, V4L1B6, A0A078HQA4, R0FDJ8, P00433, A0A178WJZ1, M4DWQ5, V4LGL0, A0A087HRE3, A0A087GZ16	452	0.0599292	0.481204
GO:0042592	homeostatic process	15	A0A087FY81, D7LF25, V4KQ77, R0F4J2, D7L598, A0A078FPP2, D7L694, A0A078I437, A0A178VRQ2, A0A178UV43, A0A078FU68, A0A087GFX9, A0A087GPG1, A0A087GGA8, R0FGI7	196	0.0616063	0.492592
GO:0050832	defense response to fungus	7	A0A0D3BRZ5, A0A0D3D7X1, A0A178VY01, Q9SIN5, A0A087GPG1, P00433, D7M9X2	72	0.0647024	0.506385
GO:0032270	positive regulation of cellular protein metabolic process	3	D7LTD9, V4L1B6, R0I6C7	19	0.064928	0.506385
GO:0009098	leucine biosynthetic process	3	D7LJX7, D7MNW6, D7MV68	19	0.064928	0.506385
GO:0010286	heat acclimation	3	V4LR78, A0A087GPG1, A0A078I437	19	0.064928	0.506385
GO:0004028	3-chloroallyl aldehyde dehydrogenase activity	3	R0INE7, V4KJE9, V4MBI2	19	0.064928	0.506385
GO:0009694	jasmonic acid metabolic process	3	R0IJD7, A0A078DXE8, A0A078JT05	19	0.064928	0.506385
GO:0000977	RNA polymerase II regulatory region sequence-specific DNA binding	2	M4CP65, R0HVT6	9	0.0700335	0.524288
GO:0015250	water channel activity	2	A0A078I000, A0A087GGA8	9	0.0700335	0.524288
GO:0042362	fat-soluble vitamin biosynthetic process	2	V4L870, V4JR39	9	0.0700335	0.524288
GO:0004084	branched-chain-amino-acid transaminase activity	2	D7MNW6, M4DTX0	9	0.0700335	0.524288
GO:1990837	sequence-specific double-stranded DNA binding	2	M4CP65, R0HVT6	9	0.0700335	0.524288
GO:0000976	transcription regulatory region sequence-specific DNA binding	2	M4CP65, R0HVT6	9	0.0700335	0.524288
GO:0005372	water transmembrane transporter activity	2	A0A078I000, A0A087GGA8	9	0.0700335	0.524288
GO:0006775	fat-soluble vitamin metabolic process	2	V4L870, V4JR39	9	0.0700335	0.524288
GO:0001012	RNA polymerase II regulatory region DNA binding	2	M4CP65, R0HVT6	9	0.0700335	0.524288
GO:0003989	acetyl-CoA carboxylase activity	2	V4KUK0, G4WXD8	9	0.0700335	0.524288
GO:0042435	indole-containing compound biosynthetic process	4	V4L1B6, R0FDJ8, A0A178WJZ1, A0A078FM14	32	0.0715298	0.524288
GO:0016667	oxidoreductase activity, acting on a sulfur group of donors	7	A0A078FU68, A0A087GFX9, R0F4J2, D7L598, A0A087GPG1, D7MV45, D7L694	74	0.0728023	0.524288
GO:0050776	regulation of immune response	3	A0A087GKB9, A0A078JT05, P00433	20	0.073688	0.524288
GO:0004029	aldehyde dehydrogenase (NAD) activity	3	R0INE7, V4KJE9, V4MBI2	20	0.073688	0.524288
GO:0002682	regulation of immune system process	3	A0A087GKB9, A0A078JT05, P00433	20	0.073688	0.524288
GO:0008144	drug binding	3	R0GFS8, A0A178UA59, V4NDH1	20	0.073688	0.524288
GO:0045088	regulation of innate immune response	3	A0A087GKB9, P00433, A0A078JT05	20	0.073688	0.524288
GO:0051247	positive regulation of protein metabolic process	3	D7LTD9, V4L1B6, R0I6C7	20	0.073688	0.524288
GO:0016620	oxidoreductase activity, acting on the aldehyde or oxo group of donors, NAD or NADP as acceptor	6	R0INE7, V4KJE9, V4MA11, O22809, V4MBI2, A0A087GZ16	60	0.075324	0.524288
GO:0006970	response to osmotic stress	18	R0INE7, D7LJX7, A0A087GS72, A0A178VRQ2, D7M9X2, A0A078I437, A9Q115, V4KJE9, D7M4F3, A0A087H5C5, V4L1B6, A0A178WJZ1, A0A178VQH8, F4JHS0, M4DWQ5, V4LGL0, B9DGT7, A0A087GZ16	253	0.0767346	0.524288
GO:0050790	regulation of catalytic activity	8	V4L5K5, V4LT85, O22256, A0A078GRZ7, V4L1B6, A0A178VMR4, Q9ZNZ7, R0FCA2	90	0.0768556	0.524288
GO:0016485	protein processing	4	M4E415, A0A0D3BYG4, R0HRD5, A0A078C054	33	0.078366	0.524288
GO:0009605	response to external stimulus	25	Q9SIN5, A0A078DXE8, Q42335, D7KLH0, A9Q115, A0A178UMQ8, E4MYB4, A0A0D3D7X1, A0A178VY01, A0A087GPG1, E4MXN5, R0FGI7, V4LT85, A0A087GEH8, A0A078JT05, D7M9X2, A0A0D3BRZ5, A0A087GKB9, Q9S9N1, M4F776, V4L1B6, R0FDJ8, P00433, A0A178WJZ1, V4LGL0	376	0.0798915	0.524288
GO:0090567	reproductive shoot system development	6	A0A087FY81, D7LF25, V4L1B6, A0A078FPP2, D7KLH0, R0FGI7	61	0.0802447	0.524288
GO:0048827	phyllome development	8	A0A087FY81, O24335, D7LF25, Q9SIN5, V4L1B6, A0A078FPP2, R0FGI7, D7KLH0	91	0.0808301	0.524288
GO:0097305	response to alcohol	12	R0INE7, Q9SIN5, V4MXR1, A0A087HIQ4, A0A075M3M5, V4KJE9, V4MA11, O22809, M4F776, V4L1B6, M4DWQ5, A0A087GZ16	155	0.0826189	0.524288
GO:0009737	response to abscisic acid	12	A0A075M3M5, R0INE7, V4KJE9, V4MA11, O22809, M4F776, V4L1B6, Q9SIN5, V4MXR1, A0A087HIQ4, M4DWQ5, A0A087GZ16	155	0.0826189	0.524288
GO:0030599	pectinesterase activity	3	V4LT85, O22256, A0A078GRZ7	21	0.0829417	0.524288
GO:0005975	carbohydrate metabolic process	36	A0A078J089, O22256, A0A178V6J6, A0A078HHR9, V4JQT7, A0A078DNP2, A0A078HL16, V4MRK7, D7KLH0, D7M346, A0A078H9S8, A0A087H5C5, F4JHS0, A0A087GEX4, V4LAE1, A0A178VCR4, A0A078GWC7, V4LT85, A0A0D3AEY2, M4EHZ1, R0IG50, A0A078GRZ7, V4LKQ8, A0A078DDG3, A0A087GS72, D7M9X2, A0A087HK48, A0A178URS6, A0A075M3M5, R0EVU0, W8Q789, A0A178VQH8, A0A0D3DPA9, M4DWQ5, V4LGL0, R0HVT6	576	0.0844029	0.524288
GO:0046556	alpha-L-arabinofuranosidase activity	2	V4LKQ8, R0EVU0	10	0.0847506	0.524288
GO:0033293	monocarboxylic acid binding	2	V4KUK0, G4WXD8	10	0.0847506	0.524288
GO:0044093	positive regulation of molecular function	4	V4L1B6, A0A178VMR4, Q9ZNZ7, R0FCA2	34	0.0855159	0.524288
GO:0044275	cellular carbohydrate catabolic process	4	A0A178V6J6, A0A078H9S8, V4JQT7, A0A178URS6	34	0.0855159	0.524288
GO:0043085	positive regulation of catalytic activity	4	V4L1B6, A0A178VMR4, Q9ZNZ7, R0FCA2	34	0.0855159	0.524288
GO:0042430	indole-containing compound metabolic process	5	V4L1B6, R0FDJ8, A0A178WJZ1, A0A078FM14, V4LGL0	48	0.0874397	0.524288
GO:0065009	regulation of molecular function	8	V4L5K5, V4LT85, O22256, A0A078GRZ7, V4L1B6, A0A178VMR4, Q9ZNZ7, R0FCA2	93	0.0891391	0.524288
GO:0048518	positive regulation of biological process	9	V4L870, D7LTD9, V4L1B6, A0A178VMR4, A0A078JT05, P00433, R0I6C7, A0A078I437, D7KLH0	109	0.0905069	0.524288
GO:0006972	hyperosmotic response	3	D7M4F3, A0A078I437, A0A087GZ16	22	0.0926656	0.524288
GO:0006586	indolalkylamine metabolic process	3	R0FDJ8, A0A178WJZ1, A0A078FM14	22	0.0926656	0.524288
GO:0019825	oxygen binding	3	V4L9M5, R0G495, Q9LQ26	22	0.0926656	0.524288
GO:0006568	tryptophan metabolic process	3	R0FDJ8, A0A178WJZ1, A0A078FM14	22	0.0926656	0.524288
GO:0051604	protein maturation	4	M4E415, A0A0D3BYG4, R0HRD5, A0A078C054	35	0.0929717	0.524288
GO:0034256	chlorophyll(ide) b reductase activity	1	A0A087G4X8	2	0.0967026	0.524288
GO:0005534	galactose binding	1	Q9SIN5	2	0.0967026	0.524288
GO:0008446	GDP-mannose 4,6-dehydratase activity	1	A0A078CAC6	2	0.0967026	0.524288
GO:0016717	oxidoreductase activity, acting on paired donors, with oxidation of a pair of donors resulting in the reduction of molecular oxygen to two molecules of water	1	A0A0D3AG00	2	0.0967026	0.524288
GO:0052317	camalexin metabolic process	1	V4L1B6	2	0.0967026	0.524288
GO:0000792	heterochromatin	1	A0A178VMR4	2	0.0967026	0.524288
GO:0006883	cellular sodium ion homeostasis	1	A0A078I437	2	0.0967026	0.524288
GO:1902418	(+)-abscisic acid D-glucopyranosyl ester transmembrane transport	1	R0HHY6	2	0.0967026	0.524288
GO:0045550	geranylgeranyl reductase activity	1	V4JR39	2	0.0967026	0.524288
GO:0050505	hydroquinone glucosyltransferase activity	1	F4JHS0	2	0.0967026	0.524288
GO:0030656	regulation of vitamin metabolic process	1	V4L870	2	0.0967026	0.524288
GO:0016629	12-oxophytodienoate reductase activity	1	A0A078DXE8	2	0.0967026	0.524288
GO:0051879	Hsp90 protein binding	1	A0A178W7K7	2	0.0967026	0.524288
GO:0000481	maturation of 5S rRNA	1	V4MXR1	2	0.0967026	0.524288
GO:0080136	priming of cellular response to stress	1	V4L1B6	2	0.0967026	0.524288
GO:1902326	positive regulation of chlorophyll biosynthetic process	1	V4L870	2	0.0967026	0.524288
GO:0035970	peptidyl-threonine dephosphorylation	1	O64730	2	0.0967026	0.524288
GO:0008200	ion channel inhibitor activity	1	R0FZH3	2	0.0967026	0.524288
GO:1902417	(+)-abscisic acid D-glucopyranosyl ester transmembrane transporter activity	1	R0HHY6	2	0.0967026	0.524288
GO:0016248	channel inhibitor activity	1	R0FZH3	2	0.0967026	0.524288
GO:0010345	suberin biosynthetic process	1	V4MBI2	2	0.0967026	0.524288
GO:0004452	isopentenyl-diphosphate delta-isomerase activity	1	V4LP72	2	0.0967026	0.524288
GO:0099106	ion channel regulator activity	1	R0FZH3	2	0.0967026	0.524288
GO:0035885	exochitinase activity	1	M4DWQ5	2	0.0967026	0.524288
GO:0046505	sulfolipid metabolic process	1	A0A178UMQ8	2	0.0967026	0.524288
GO:0010120	camalexin biosynthetic process	1	V4L1B6	2	0.0967026	0.524288
GO:0051194	positive regulation of cofactor metabolic process	1	V4L870	2	0.0967026	0.524288
GO:0051341	regulation of oxidoreductase activity	1	A0A178VMR4	2	0.0967026	0.524288
GO:0046506	sulfolipid biosynthetic process	1	A0A178UMQ8	2	0.0967026	0.524288
GO:0004753	saccharopine dehydrogenase activity	1	A0A078CGS5	2	0.0967026	0.524288
GO:0008153	para-aminobenzoic acid biosynthetic process	1	D7MNW6	2	0.0967026	0.524288
GO:0004604	phosphoadenylyl-sulfate reductase (thioredoxin) activity	1	A0A087GFX9	2	0.0967026	0.524288
GO:0051181	cofactor transport	1	D7M8K0	2	0.0967026	0.524288
GO:0045300	acyl-[acyl-carrier-protein] desaturase activity	1	A0A0D3AG00	2	0.0967026	0.524288
GO:1901465	positive regulation of tetrapyrrole biosynthetic process	1	V4L870	2	0.0967026	0.524288
GO:0019156	isoamylase activity	1	A0A178V6J6	2	0.0967026	0.524288
GO:0055064	chloride ion homeostasis	1	A0A078I437	2	0.0967026	0.524288
GO:2000280	regulation of root development	1	A0A087HKF2	2	0.0967026	0.524288
GO:0009973	adenylyl-sulfate reductase activity	1	A0A087GFX9	2	0.0967026	0.524288
GO:0042178	xenobiotic catabolic process	1	F4JHS0	2	0.0967026	0.524288
GO:0030644	cellular chloride ion homeostasis	1	A0A078I437	2	0.0967026	0.524288
GO:0030089	phycobilisome	1	D7LZC0	2	0.0967026	0.524288
GO:0016636	oxidoreductase activity, acting on the CH-CH group of donors, iron-sulfur protein as acceptor	1	A0A087GKB9	2	0.0967026	0.524288
GO:1901656	glycoside transport	1	R0HHY6	2	0.0967026	0.524288
GO:0042947	glucoside transmembrane transporter activity	1	R0HHY6	2	0.0967026	0.524288
GO:0071280	cellular response to copper ion	1	A9Q115	2	0.0967026	0.524288
GO:0010497	plasmodesmata-mediated intercellular transport	1	A0A087HKF2	2	0.0967026	0.524288
GO:0019211	phosphatase activator activity	1	R0FCA2	2	0.0967026	0.524288
GO:0047130	saccharopine dehydrogenase (NADP+, L-lysine-forming) activity	1	A0A078CGS5	2	0.0967026	0.524288
GO:0009573	chloroplast ribulose bisphosphate carboxylase complex	1	R0IG50	2	0.0967026	0.524288
GO:0009513	etioplast	1	A0A078HQA4	2	0.0967026	0.524288
GO:0051353	positive regulation of oxidoreductase activity	1	A0A178VMR4	2	0.0967026	0.524288
GO:0004358	glutamate N-acetyltransferase activity	1	A0A0D3C4T3	2	0.0967026	0.524288
GO:0051743	red chlorophyll catabolite reductase activity	1	A0A087GKB9	2	0.0967026	0.524288
GO:0042946	glucoside transport	1	R0HHY6	2	0.0967026	0.524288
GO:0006610	ribosomal protein import into nucleus	1	D7LZC0	2	0.0967026	0.524288
GO:0008843	endochitinase activity	1	M4DWQ5	2	0.0967026	0.524288
GO:1901002	positive regulation of response to salt stress	1	A0A078I437	2	0.0967026	0.524288
GO:0016102	diterpenoid biosynthetic process	1	V4L870	2	0.0967026	0.524288
GO:0071258	cellular response to gravity	1	B9DGT7	2	0.0967026	0.524288
GO:0048492	ribulose bisphosphate carboxylase complex	1	R0IG50	2	0.0967026	0.524288
GO:0006346	methylation-dependent chromatin silencing	1	A0A178VMR4	2	0.0967026	0.524288
GO:1901403	positive regulation of tetrapyrrole metabolic process	1	V4L870	2	0.0967026	0.524288
GO:1901682	sulfur compound transmembrane transporter activity	1	D7M8K0	2	0.0967026	0.524288
GO:0033741	adenylyl-sulfate reductase (glutathione) activity	1	A0A087GFX9	2	0.0967026	0.524288
GO:0055114	oxidation-reduction process	56	A0A087GRU5, A0A078J089, A0A078CGS5, D7LF25, A0A078DXE8, D7L598, A0A078FPP2, V4JR39, V4NYR7, Q8LFU3, A9Q115, V4KJE9, V4L9M5, A0A0D3D7X1, A0A0D2ZX28, R0I5Y8, M4EEC8, V4LAE1, R0FGI7, R0INE7, A0A087GEH8, Q3ZVC8, V4KQ77, F4HXZ3, A0A087HK48, U5IB74, A0A0D3AG00, V4MBI2, A0A078CZL5, V4K9A3, A0A087GZ16, A0A175DDT6, A0A087G4X8, D7LKW5, R0F4J2, A0A0D3C6F4, A0A178VYZ1, D7L694, A0A087GFX9, A0A078IPM7, A0A0D3A…	957	0.0987493	0.525794
GO:0009893	positive regulation of metabolic process	5	V4L870, D7LTD9, V4L1B6, A0A178VMR4, R0I6C7	50	0.100059	0.525794
GO:0016885	ligase activity, forming carbon-carbon bonds	2	V4KUK0, G4WXD8	11	0.100296	0.525794
GO:0006833	water transport	2	A0A078I000, A0A087GGA8	11	0.100296	0.525794
GO:0004784	superoxide dismutase activity	2	U5IB74, A9Q115	11	0.100296	0.525794
GO:0016421	CoA carboxylase activity	2	V4KUK0, G4WXD8	11	0.100296	0.525794
GO:0102483	scopolin beta-glucosidase activity	2	V4LGL0, A0A178URS6	11	0.100296	0.525794
GO:0016721	oxidoreductase activity, acting on superoxide radicals as acceptor	2	U5IB74, A9Q115	11	0.100296	0.525794
GO:0080135	regulation of cellular response to stress	2	A0A087GKB9, V4L1B6	11	0.100296	0.525794
GO:0051347	positive regulation of transferase activity	2	V4L1B6, Q9ZNZ7	11	0.100296	0.525794
GO:0042044	fluid transport	2	A0A078I000, A0A087GGA8	11	0.100296	0.525794
GO:0045735	nutrient reservoir activity	2	A0A087HKF2, A0A078I437	11	0.100296	0.525794
GO:0034599	cellular response to oxidative stress	6	A0A0D3AEV6, A0A087GPG1, A0A0D3CQN5, U5IB74, A9Q115, A0A178URS6	65	0.101674	0.531553
GO:0042401	cellular biogenic amine biosynthetic process	3	R0FDJ8, A0A178WJZ1, A0A078FM14	23	0.102835	0.533227
GO:0045490	pectin catabolic process	3	V4LT85, O22256, A0A078GRZ7	23	0.102835	0.533227
GO:0009309	amine biosynthetic process	3	R0FDJ8, A0A178WJZ1, A0A078FM14	23	0.102835	0.533227
GO:0010038	response to metal ion	22	A0A087FY81, A0A078J089, D7LF25, A0A078FPP2, A0A178VP87, D7MV68, A0A087GS72, A0A078DVT2, A0A178URS6, A0A178UV43, A9Q115, A0A075M3M5, V4MA11, O22809, A0A087H5C5, M4D7S0, A0A087GPG1, R0I5Y8, A0A178VQH8, B9DGT7, V4K9A3, R0FGI7	334	0.103595	0.535708
GO:0006073	cellular glucan metabolic process	8	A0A178V6J6, A0A078H9S8, V4JQT7, A0A078HL16, R0HVT6, A0A087GEX4, A0A178URS6, D7KLH0	97	0.107186	0.551285
GO:0044042	glucan metabolic process	8	A0A178V6J6, A0A078H9S8, V4JQT7, A0A078HL16, R0HVT6, A0A087GEX4, A0A178URS6, D7KLH0	97	0.107186	0.551285
GO:0099402	plant organ development	12	A0A087FY81, O24335, D7LF25, A0A087HKF2, Q9SIN5, D7M3Z4, A0A078FPP2, D7KLH0, V4L1B6, R0FDJ8, A0A178WJZ1, R0FGI7	163	0.109538	0.561861
GO:0003727	single-stranded RNA binding	3	A0A087GEH8, A0A0D3D7X1, D7LTD9	24	0.113423	0.579258
GO:0009072	aromatic amino acid family metabolic process	5	A0A087GEG9, D7MNW6, R0FDJ8, A0A178WJZ1, A0A078FM14	52	0.113538	0.579258
GO:0044272	sulfur compound biosynthetic process	10	A0A178UMQ8, A0A078J089, A0A087GFX9, D7LJX7, V4L1B6, D7MV68, D7L694, A0A087HK48, V4LAE1, D7KLH0	131	0.114447	0.582333
GO:0045727	positive regulation of translation	2	D7LTD9, R0I6C7	12	0.116552	0.583291
GO:0004489	methylenetetrahydrofolate reductase (NAD(P)H) activity	2	D7LKW5, A0A178VYZ1	12	0.116552	0.583291
GO:0016844	strictosidine synthase activity	2	V4KKH0, A0A178WA54	12	0.116552	0.583291
GO:0034250	positive regulation of cellular amide metabolic process	2	D7LTD9, R0I6C7	12	0.116552	0.583291
GO:0055081	anion homeostasis	2	A0A078I437, A0A178VRQ2	12	0.116552	0.583291
GO:0008361	regulation of cell size	2	A0A087GGA8, D7KLH0	12	0.116552	0.583291
GO:0043086	negative regulation of catalytic activity	4	V4L5K5, V4LT85, O22256, A0A078GRZ7	38	0.117087	0.583291
GO:0031347	regulation of defense response	4	A0A087GKB9, A0A078JT05, P00433, V4LGL0	38	0.117087	0.583291
GO:0016646	oxidoreductase activity, acting on the CH-NH group of donors, NAD or NADP as acceptor	3	A0A078CGS5, D7LKW5, A0A178VYZ1	25	0.124405	0.590509
GO:0009744	response to sucrose	3	A0A078HQA4, Q9ZNZ7, A9Q115	25	0.124405	0.590509
GO:0034285	response to disaccharide	3	A0A078HQA4, Q9ZNZ7, A9Q115	25	0.124405	0.590509
GO:0009651	response to salt stress	16	R0INE7, D7LJX7, A0A078I437, A0A087GS72, A0A178VRQ2, D7M9X2, A9Q115, V4KJE9, A0A087H5C5, A0A178WJZ1, A0A178VQH8, F4JHS0, M4DWQ5, V4LGL0, B9DGT7, A0A087GZ16	237	0.128258	0.590509
GO:0051188	cofactor biosynthetic process	11	A0A078J089, V4L870, D7MNW6, D7LYF5, D7L694, V4JR39, V4LP72, A0A087HK48, V4LAE1, D7KLH0, A0A0D3BFD9	151	0.128498	0.590509
GO:0004497	monooxygenase activity	8	A0A075M3M5, V4L9M5, M4EHZ1, R0IG50, R0G495, A0A0D3C6F4, Q9LQ26, Q8LFU3	102	0.132358	0.590509
GO:0042440	pigment metabolic process	8	A0A087GKB9, V4L870, A0A087G4X8, D7LYF5, V4JR39, V4LP72, D7KLH0, A0A0D3BFD9	102	0.132358	0.590509
GO:0051338	regulation of transferase activity	2	V4L1B6, Q9ZNZ7	13	0.133411	0.590509
GO:0043621	protein self-association	2	R0I5H3, R0I205	13	0.133411	0.590509
GO:0045089	positive regulation of innate immune response	2	P00433, A0A078JT05	13	0.133411	0.590509
GO:0008080	N-acetyltransferase activity	2	A0A0D3C4T3, V4LD01	13	0.133411	0.590509
GO:0050778	positive regulation of immune response	2	P00433, A0A078JT05	13	0.133411	0.590509
GO:0016881	acid-amino acid ligase activity	2	A0A178VHR6, A0A078JT05	13	0.133411	0.590509
GO:0002684	positive regulation of immune system process	2	P00433, A0A078JT05	13	0.133411	0.590509
GO:0010033	response to organic substance	32	D7LTD9, Q9SIN5, D7L598, V4NYR7, A0A078I437, A9Q115, V4KJE9, V4MA11, A0A0D3D7X1, A0A087GPG1, Q9ZNZ7, A0A078IRE8, R0FGI7, R0INE7, F4HXZ3, V4MXR1, A0A078JT05, A0A087HIQ4, A0A087GS72, A0A178URS6, A0A075M3M5, O22809, M4F776, V4L1B6, A0A078HQA4, R0FDJ8, P00433, A0A178WJZ1, M4DWQ5, V4LGL0, A0A087GZ16, A0A087HRE3	528	0.133752	0.590509
GO:0044092	negative regulation of molecular function	4	V4L5K5, V4LT85, O22256, A0A078GRZ7	40	0.134522	0.590509
GO:0008422	beta-glucosidase activity	3	V4LGL0, D7M9X2, A0A178URS6	26	0.135753	0.590509
GO:0006551	leucine metabolic process	3	D7LJX7, D7MNW6, D7MV68	26	0.135753	0.590509
GO:0044264	cellular polysaccharide metabolic process	8	A0A178V6J6, A0A078H9S8, V4JQT7, A0A078HL16, R0HVT6, A0A087GEX4, A0A178URS6, D7KLH0	103	0.137729	0.590509
GO:0009507	chloroplast	113	Q93ZN4, D7KNV0, D7LF25, A0A087GEG9, A0A178VHR6, Q9SIN5, D7L598, A0A0D3B7Y7, V4KQ28, A0A078C054, A0A078J003, V4KUK0, A0A078I437, R0GSV2, R0FGI7, A0A087GEH8, A0A078D5C6, V4L870, D7MNW6, D7MV68, A0A178W0Q2, A0A078CTT3, Q8LCQ4, R0GFS8, D7MUT9, D7M8K0, R0FDJ8, A4QJL4, D7MDS7, V4KKY6, V4LP72, V4L0Y4, B9DGT7, A0A087GZ16, A0A175DDT6, A0A087G4X8, A0A078GNK2, G4WXD8, D7LFE3, A0A0D3BFD9, D7M346, A0A087HIW3,…	2091	0.14007	0.590509
GO:0048367	shoot system development	10	A0A087FY81, O24335, D7LF25, V4KQ77, Q9SIN5, V4L1B6, A0A078FPP2, A0A178W7K7, D7KLH0, R0FGI7	137	0.141364	0.590509
GO:0043405	regulation of MAP kinase activity	1	V4L1B6	3	0.141499	0.590509
GO:0000981	RNA polymerase II transcription factor activity, sequence-specific DNA binding	1	M4CP65	3	0.141499	0.590509
GO:0019477	L-lysine catabolic process	1	A0A078CGS5	3	0.141499	0.590509
GO:0052655	L-valine transaminase activity	1	M4DTX0	3	0.141499	0.590509
GO:2000037	regulation of stomatal complex patterning	1	V4L1B6	3	0.141499	0.590509
GO:0030320	cellular monovalent inorganic anion homeostasis	1	A0A078I437	3	0.141499	0.590509
GO:0008559	xenobiotic-transporting ATPase activity	1	R0HHY6	3	0.141499	0.590509
GO:0016869	intramolecular transferase activity, transferring amino groups	1	A0A0D3BFD9	3	0.141499	0.590509
GO:0043406	positive regulation of MAP kinase activity	1	V4L1B6	3	0.141499	0.590509
GO:0000187	activation of MAPK activity	1	V4L1B6	3	0.141499	0.590509
GO:0019419	sulfate reduction	1	A0A087GFX9	3	0.141499	0.590509
GO:0006805	xenobiotic metabolic process	1	F4JHS0	3	0.141499	0.590509
GO:0009911	positive regulation of flower development	1	D7KLH0	3	0.141499	0.590509
GO:0046440	L-lysine metabolic process	1	A0A078CGS5	3	0.141499	0.590509
GO:0043495	protein anchor	1	V4L870	3	0.141499	0.590509
GO:0046482	para-aminobenzoic acid metabolic process	1	D7MNW6	3	0.141499	0.590509
GO:0043410	positive regulation of MAPK cascade	1	V4L1B6	3	0.141499	0.590509
GO:0045157	electron transporter, transferring electrons within the noncyclic electron transport pathway of photosynthesis activity	1	A0A087GEH8	3	0.141499	0.590509
GO:0010200	response to chitin	1	V4L1B6	3	0.141499	0.590509
GO:0071324	cellular response to disaccharide stimulus	1	A9Q115	3	0.141499	0.590509
GO:1903173	fatty alcohol metabolic process	1	V4L870	3	0.141499	0.590509
GO:0098572	stromal side of plastid thylakoid membrane	1	V4L0Y4	3	0.141499	0.590509
GO:0052656	L-isoleucine transaminase activity	1	M4DTX0	3	0.141499	0.590509
GO:0055078	sodium ion homeostasis	1	A0A078I437	3	0.141499	0.590509
GO:0006554	lysine catabolic process	1	A0A078CGS5	3	0.141499	0.590509
GO:0032147	activation of protein kinase activity	1	V4L1B6	3	0.141499	0.590509
GO:0005384	manganese ion transmembrane transporter activity	1	A0A178UV43	3	0.141499	0.590509
GO:1902533	positive regulation of intracellular signal transduction	1	V4L1B6	3	0.141499	0.590509
GO:0016247	channel regulator activity	1	R0FZH3	3	0.141499	0.590509
GO:0052654	L-leucine transaminase activity	1	M4DTX0	3	0.141499	0.590509
GO:1901562	response to paraquat	1	A0A078I437	3	0.141499	0.590509
GO:0009702	L-arabinokinase activity	1	V4MRK7	3	0.141499	0.590509
GO:0000060	protein import into nucleus, translocation	1	D7LZC0	3	0.141499	0.590509
GO:0033306	phytol metabolic process	1	V4L870	3	0.141499	0.590509
GO:0043408	regulation of MAPK cascade	1	V4L1B6	3	0.141499	0.590509
GO:0042910	xenobiotic transporter activity	1	R0HHY6	3	0.141499	0.590509
GO:0071256	translocon complex	1	A0A078CTT3	3	0.141499	0.590509
GO:0005784	Sec61 translocon complex	1	A0A078CTT3	3	0.141499	0.590509
GO:0071466	cellular response to xenobiotic stimulus	1	F4JHS0	3	0.141499	0.590509
GO:0034337	RNA folding	1	V4MXR1	3	0.141499	0.590509
GO:0010496	intercellular transport	1	A0A087HKF2	3	0.141499	0.590509
GO:0071329	cellular response to sucrose stimulus	1	A9Q115	3	0.141499	0.590509
GO:0030867	rough endoplasmic reticulum membrane	1	A0A078CTT3	3	0.141499	0.590509
GO:0031305	integral component of mitochondrial inner membrane	1	A0A078HQA4	3	0.141499	0.590509
GO:1901000	regulation of response to salt stress	1	A0A078I437	3	0.141499	0.590509
GO:0004370	glycerol kinase activity	1	A0A078DDG3	3	0.141499	0.590509
GO:0051184	cofactor transporter activity	1	D7M8K0	3	0.141499	0.590509
GO:0004042	acetyl-CoA:L-glutamate N-acetyltransferase activity	1	A0A0D3C4T3	3	0.141499	0.590509
GO:0009410	response to xenobiotic stimulus	1	F4JHS0	3	0.141499	0.590509
GO:0042286	glutamate-1-semialdehyde 2,1-aminomutase activity	1	A0A0D3BFD9	3	0.141499	0.590509
GO:0009864	induced systemic resistance, jasmonic acid mediated signaling pathway	1	A0A078JT05	3	0.141499	0.590509
GO:0005791	rough endoplasmic reticulum	1	A0A078CTT3	3	0.141499	0.590509
GO:0060968	regulation of gene silencing	1	A0A178VMR4	3	0.141499	0.590509
GO:0008652	cellular amino acid biosynthetic process	15	O24335, A0A087GEG9, D7LJX7, D7MNW6, D7MV68, A0A078FM14, A0A087H276, A0A078EGE6, A0A087GFX9, A0A0D3C4T3, R0FDJ8, A0A178WJZ1, Q9ZNZ7, A0A078CZL5, A0A087GZ16	224	0.144288	0.600832
GO:0016769	transferase activity, transferring nitrogenous groups	6	D7MNW6, A0A178VP87, A0A178WAU5, M4DYT6, M4DTX0, A0A0D3BFD9	72	0.145561	0.603492
GO:0008483	transaminase activity	6	D7MNW6, A0A178VP87, A0A178WAU5, M4DYT6, M4DTX0, A0A0D3BFD9	72	0.145561	0.603492
GO:0016645	oxidoreductase activity, acting on the CH-NH group of donors	3	A0A078CGS5, D7LKW5, A0A178VYZ1	27	0.147441	0.606596
GO:0009526	plastid envelope	34	A0A087GRU5, D7LTD9, D7LF25, R0F4J2, Q9SIN5, A0A078FPP2, D7L694, R0I6C7, A0A078J003, V4JR39, V4KUK0, A0A078I437, A0A078GNK2, G4WXD8, A0A178UMQ8, A0A087H5C5, D7LYF5, Q9ZNZ7, V4LAE1, A0A087FY81, A0A087GEH8, R0IG50, F4HXZ3, A0A078DWY1, A0A087HK48, Q8LCQ4, A0A075M3M5, A0A087GKB9, D7M8K0, A0A078HQA4, A4QJL4, A0A178VQH8, V4L0Y4, R0IKM7	571	0.147612	0.606596
GO:0009941	chloroplast envelope	33	A0A087GRU5, D7LTD9, D7LF25, R0F4J2, Q9SIN5, A0A078FPP2, D7L694, V4JR39, R0I6C7, A0A078J003, A0A078I437, V4KUK0, A0A078GNK2, G4WXD8, A0A178UMQ8, A0A087H5C5, D7LYF5, Q9ZNZ7, V4LAE1, A0A087FY81, A0A087GEH8, R0IG50, F4HXZ3, A0A078DWY1, A0A087HK48, Q8LCQ4, A0A075M3M5, A0A087GKB9, D7M8K0, A0A078HQA4, A0A178VQH8, V4L0Y4, R0IKM7	553	0.149096	0.606596
GO:0031349	positive regulation of defense response	2	P00433, A0A078JT05	14	0.150772	0.606596
GO:0016843	amine-lyase activity	2	V4KKH0, A0A178WA54	14	0.150772	0.606596
GO:0016410	N-acyltransferase activity	2	A0A0D3C4T3, V4LD01	14	0.150772	0.606596
GO:0010311	lateral root formation	2	R0FDJ8, A0A178WJZ1	14	0.150772	0.606596
GO:0044212	transcription regulatory region DNA binding	2	M4CP65, R0HVT6	14	0.150772	0.606596
GO:0009269	response to desiccation	2	R0INE7, V4KJE9	14	0.150772	0.606596
GO:0000975	regulatory region DNA binding	2	M4CP65, R0HVT6	14	0.150772	0.606596
GO:0080130	L-phenylalanine:2-oxoglutarate aminotransferase activity	2	A0A178VP87, M4DYT6	14	0.150772	0.606596
GO:0001067	regulatory region nucleic acid binding	2	M4CP65, R0HVT6	14	0.150772	0.606596
GO:0010410	hemicellulose metabolic process	2	R0EVU0, A0A087GEX4	14	0.150772	0.606596
GO:0070546	L-phenylalanine aminotransferase activity	2	A0A178VP87, M4DYT6	14	0.150772	0.606596
GO:0009570	chloroplast stroma	45	A0A087GRU5, D7KNV0, A0A178V6J6, D7LTD9, D7LF25, A0A087GEG9, R0F4J2, O64730, Q9SIN5, D7L598, A0A078FPP2, A0A078C054, D7L694, R0I6C7, R0G9G5, V4KUK0, G4WXD8, D7LFE3, A0A0D3D7X1, A0A087H5C5, M4E415, A0A087GPG1, Q9ZNZ7, V4LAE1, R0FGI7, A0A087FY81, A0A087GEH8, R0IG50, D7LJX7, F4HXZ3, D7MNW6, V4MXR1, D7MV68, A0A0D3CQN5, A0A078DWY1, A0A087HK48, Q8LCQ4, A0A075M3M5, A0A087GKB9, Q6DBN2, R0FDJ8, A0A178VQH8,…	780	0.152707	0.613084
GO:0033993	response to lipid	12	R0INE7, Q9SIN5, V4MXR1, A0A087HIQ4, A0A075M3M5, V4KJE9, V4MA11, O22809, M4F776, V4L1B6, M4DWQ5, A0A087GZ16	174	0.153997	0.616961
GO:0044711	single-organism biosynthetic process	49	A0A078J089, A0A087GEG9, A0A078DXE8, A0A078FM14, A0A078HL16, V4JR39, V4KUK0, Q8LFU3, A0A078EGE6, V4L9M5, V4MA11, V4LAE1, V4L870, D7MNW6, A0A087GN96, D7MV68, A0A087HK48, A0A087H276, A0A078F758, O22809, V4L1B6, R0FDJ8, A0A178VQH8, V4LP72, R0HVT6, V4MBI2, A0A078CZL5, A0A087GZ16, O24335, R0IJD7, D7L694, A0A0D3BFD9, D7KLH0, D7LFE3, G4WXD8, A0A178UMQ8, A0A087GFX9, A0A087H5C5, F4JHS0, D7LYF5, Q9ZNZ7, M4E…	858	0.156964	0.627528
GO:0005576	extracellular region	38	O22256, D7LTD9, A0A087HKF2, V4P9U3, A0A078CW80, V4NYR7, A0A078I437, A9Q115, V4L5K5, R0HGQ5, A0A0D3D7X1, A0A078G2D0, M4F884, A0A087GPG1, Q9ZNZ7, A0A087GEX4, A0A078IRE8, A0A078CI95, A0A087GEH8, V4LT85, R0IG50, V4LKQ8, D7M3Z4, R0HB45, A0A087GS72, D7M9X2, R0FZH3, D7LBB4, A0A075M3M5, R0GFS8, A0A078FU68, D7KJB1, R0EVU0, P00433, M4DWQ5, R0G8R2, A0A087HRE3, V4NDH1	650	0.157355	0.627713
GO:0009521	photosystem	7	Q8LCQ4, A0A087HIW3, A0A175DDT6, A0A078G8S3, A0A087GI99, A0A0D3A7X4, A4QJL4	90	0.15767	0.627713
GO:0051173	positive regulation of nitrogen compound metabolic process	3	V4L870, D7LTD9, R0I6C7	28	0.159441	0.629567
GO:0003824	catalytic activity	184	Q93ZN4, A0A078J089, D7KNV0, A0A087H0S8, A0A087GEG9, D7LF25, A0A078CGS5, A0A178VHR6, V4P9U3, D7L598, A0A078C054, V4NYR7, A0A0D3E0J8, M4DTX0, V4KUK0, V4LGD7, A0A078F7S0, A9Q115, A0A078EGE6, V4KJE9, D7KQK4, A0A087H5E9, A0A087G8N1, A0A087GEX4, R0FCA2, R0FGI7, R0INE7, A0A087GEH8, A0A0D3AEY2, A0A078D5C6, R0H6Q5, A0A087GJJ7, V4KKH0, D7MNW6, A0A087GN96, D7MV68, U5IB74, A0A087H276, D7LBB4, R0GFS8, M4F776,…	3528	0.162036	0.629567
GO:0044436	thylakoid part	25	A0A087GRU5, A0A175DDT6, A0A087G4X8, V4JR39, A0A087HIW3, A0A0D3D7X1, A0A087GI99, A0A087H5C5, R0FGI7, A0A087GEH8, Q3ZVC8, V4L870, Q8LCQ4, R0GFS8, A0A075M3M5, A0A078G8S3, Q6DBN2, A0A0D3A7X4, A4QJL4, D7LZC0, A0A178VQH8, V4L0Y4, R0IKM7, A0A178UA59, V4NDH1	410	0.162687	0.629567
GO:0004553	hydrolase activity, hydrolyzing O-glycosyl compounds	12	A0A0D3AEY2, A0A178V6J6, V4LKQ8, A0A078H9S8, R0EVU0, V4JQT7, A0A0D3DPA9, M4DWQ5, V4LGL0, D7M9X2, A0A087GEX4, A0A178URS6	176	0.162968	0.629567
GO:0048583	regulation of response to stimulus	7	A0A087GKB9, V4L1B6, A0A178VMR4, A0A078JT05, P00433, V4LGL0, A0A078I437	91	0.164074	0.629567
GO:0008299	isoprenoid biosynthetic process	5	V4L870, A0A087GN96, V4LP72, D7KLH0, D7LFE3	59	0.166889	0.629567
GO:0015996	chlorophyll catabolic process	2	A0A087GKB9, A0A087G4X8	15	0.168546	0.629567
GO:0042255	ribosome assembly	2	Q9FJZ2, A0A078DWY1	15	0.168546	0.629567
GO:0004069	L-aspartate:2-oxoglutarate aminotransferase activity	2	A0A178VP87, M4DYT6	15	0.168546	0.629567
GO:0010102	lateral root morphogenesis	2	R0FDJ8, A0A178WJZ1	15	0.168546	0.629567
GO:0010101	post-embryonic root morphogenesis	2	R0FDJ8, A0A178WJZ1	15	0.168546	0.629567
GO:0009631	cold acclimation	2	Q9SIN5, A0A178VRQ2	15	0.168546	0.629567
GO:0009579	thylakoid	33	A0A087GRU5, A0A175DDT6, A0A087G4X8, D7LTD9, V4JR39, A0A087HIW3, A0A0D3D7X1, A0A087GI99, A0A087H5C5, D7LYF5, R0FGI7, A0A087GEH8, Q3ZVC8, V4L870, R0IG50, V4KQ77, F4HXZ3, A0A178W0Q2, A0A178VXY5, Q8LCQ4, R0GFS8, A0A075M3M5, A0A087GSJ9, A0A078G8S3, Q6DBN2, A0A0D3A7X4, A4QJL4, D7LZC0, A0A178VQH8, V4L0Y4, R0IKM7, A0A178UA59, V4NDH1	561	0.169311	0.629567
GO:0009532	plastid stroma	45	A0A087GRU5, D7KNV0, A0A178V6J6, D7LF25, A0A087GEG9, D7LTD9, R0F4J2, O64730, Q9SIN5, D7L598, A0A078FPP2, A0A078C054, D7L694, R0I6C7, R0G9G5, V4KUK0, G4WXD8, D7LFE3, A0A0D3D7X1, A0A087H5C5, M4E415, A0A087GPG1, Q9ZNZ7, V4LAE1, R0FGI7, A0A087FY81, A0A087GEH8, R0IG50, D7LJX7, F4HXZ3, D7MNW6, V4MXR1, D7MV68, A0A0D3CQN5, A0A078DWY1, A0A087HK48, Q8LCQ4, A0A087GKB9, A0A075M3M5, Q6DBN2, R0FDJ8, A0A178VQH8,…	788	0.17013	0.629567
GO:0031325	positive regulation of cellular metabolic process	4	V4L870, D7LTD9, V4L1B6, R0I6C7	44	0.17225	0.629567
GO:0042651	thylakoid membrane	23	A0A087GRU5, A0A175DDT6, A0A087GEH8, Q3ZVC8, V4L870, A0A087G4X8, V4JR39, Q8LCQ4, A0A087HIW3, A0A075M3M5, A0A078G8S3, A0A0D3D7X1, A0A087H5C5, Q6DBN2, A0A087GI99, A0A0D3A7X4, A4QJL4, D7LZC0, A0A178VQH8, V4L0Y4, R0IKM7, R0FGI7, A0A178UA59	377	0.174443	0.629567
GO:0009536	plastid	113	Q93ZN4, D7KNV0, D7LF25, A0A087GEG9, A0A178VHR6, Q9SIN5, D7L598, A0A0D3B7Y7, V4KQ28, A0A078C054, A0A078J003, A0A078I437, V4KUK0, R0GSV2, R0FGI7, A0A087GEH8, A0A078D5C6, V4L870, D7MNW6, D7MV68, A0A178W0Q2, A0A078CTT3, Q8LCQ4, R0GFS8, D7MUT9, D7M8K0, R0FDJ8, A4QJL4, D7MDS7, V4KKY6, V4LP72, V4L0Y4, B9DGT7, A0A087GZ16, A0A175DDT6, A0A087G4X8, A0A078GNK2, G4WXD8, D7LFE3, A0A0D3BFD9, D7M346, A0A087HIW3,…	2115	0.175287	0.629567
GO:0008194	UDP-glycosyltransferase activity	6	A0A178UMQ8, W8Q789, A0A078DNP2, F4JHS0, A0A078HL16, R0HVT6	77	0.181368	0.629567
GO:0004857	enzyme inhibitor activity	4	V4L5K5, V4LT85, O22256, A0A078GRZ7	45	0.182207	0.629567
GO:0019685	photosynthesis, dark reaction	5	A0A075M3M5, M4EHZ1, R0IG50, A0A087H5C5, A0A178VQH8	61	0.183693	0.629567
GO:0019253	reductive pentose-phosphate cycle	5	A0A075M3M5, M4EHZ1, R0IG50, A0A087H5C5, A0A178VQH8	61	0.183693	0.629567
GO:0009523	photosystem II	5	A0A087HIW3, A0A175DDT6, A0A078G8S3, A0A0D3A7X4, A4QJL4	61	0.183693	0.629567
GO:0045834	positive regulation of lipid metabolic process	1	V4L870	4	0.18408	0.629567
GO:0046217	indole phytoalexin metabolic process	1	V4L1B6	4	0.18408	0.629567
GO:0080114	positive regulation of glycine hydroxymethyltransferase activity	1	Q9ZNZ7	4	0.18408	0.629567
GO:0052510	positive regulation by organism of defense response of other organism involved in symbiotic interaction	1	P00433	4	0.18408	0.629567
GO:0052200	response to host defenses	1	P00433	4	0.18408	0.629567
GO:0043024	ribosomal small subunit binding	1	Q9FJZ2	4	0.18408	0.629567
GO:0052305	positive regulation by organism of innate immune response in other organism involved in symbiotic interaction	1	P00433	4	0.18408	0.629567
GO:0052555	positive regulation by organism of immune response of other organism involved in symbiotic interaction	1	P00433	4	0.18408	0.629567
GO:0006433	prolyl-tRNA aminoacylation	1	A0A0D3EAC9	4	0.18408	0.629567
GO:0009403	toxin biosynthetic process	1	V4L1B6	4	0.18408	0.629567
GO:0071457	cellular response to ozone	1	A9Q115	4	0.18408	0.629567
GO:0009700	indole phytoalexin biosynthetic process	1	V4L1B6	4	0.18408	0.629567
GO:0031907	microbody lumen	1	D7MIF8	4	0.18408	0.629567
GO:0052556	positive regulation by symbiont of host immune response	1	P00433	4	0.18408	0.629567
GO:0052572	response to host immune response	1	P00433	4	0.18408	0.629567
GO:0033609	oxalate metabolic process	1	A0A087HKF2	4	0.18408	0.629567
GO:0052306	modulation by organism of innate immune response in other organism involved in symbiotic interaction	1	P00433	4	0.18408	0.629567
GO:0052553	modulation by symbiont of host immune response	1	P00433	4	0.18408	0.629567
GO:0052552	modulation by organism of immune response of other organism involved in symbiotic interaction	1	P00433	4	0.18408	0.629567
GO:0042023	DNA endoreduplication	1	M4CP65	4	0.18408	0.629567
GO:1902170	cellular response to reactive nitrogen species	1	A0A178URS6	4	0.18408	0.629567
GO:0075136	response to host	1	P00433	4	0.18408	0.629567
GO:0044786	cell cycle DNA replication	1	M4CP65	4	0.18408	0.629567
GO:2000243	positive regulation of reproductive process	1	D7KLH0	4	0.18408	0.629567
GO:0052509	positive regulation by symbiont of host defense response	1	P00433	4	0.18408	0.629567
GO:0045828	positive regulation of isoprenoid metabolic process	1	V4L870	4	0.18408	0.629567
GO:0016101	diterpenoid metabolic process	1	V4L870	4	0.18408	0.629567
GO:0052314	phytoalexin metabolic process	1	V4L1B6	4	0.18408	0.629567
GO:0003856	3-dehydroquinate synthase activity	1	A0A087GEG9	4	0.18408	0.629567
GO:0052033	pathogen-associated molecular pattern dependent induction by symbiont of host innate immune response	1	P00433	4	0.18408	0.629567
GO:0046889	positive regulation of lipid biosynthetic process	1	V4L870	4	0.18408	0.629567
GO:0052257	pathogen-associated molecular pattern dependent induction by organism of innate immune response of other organism involved in symbiotic interaction	1	P00433	4	0.18408	0.629567
GO:0052166	positive regulation by symbiont of host innate immune response	1	P00433	4	0.18408	0.629567
GO:0009834	plant-type secondary cell wall biogenesis	1	R0HVT6	4	0.18408	0.629567
GO:0052169	pathogen-associated molecular pattern dependent modulation by symbiont of host innate immune response	1	P00433	4	0.18408	0.629567
GO:0005782	peroxisomal matrix	1	D7MIF8	4	0.18408	0.629567
GO:0052031	modulation by symbiont of host defense response	1	P00433	4	0.18408	0.629567
GO:0030002	cellular anion homeostasis	1	A0A078I437	4	0.18408	0.629567
GO:0019673	GDP-mannose metabolic process	1	A0A078CAC6	4	0.18408	0.629567
GO:0052173	response to defenses of other organism involved in symbiotic interaction	1	P00433	4	0.18408	0.629567
GO:0052167	modulation by symbiont of host innate immune response	1	P00433	4	0.18408	0.629567
GO:1902884	positive regulation of response to oxidative stress	1	A0A078I437	4	0.18408	0.629567
GO:0052308	pathogen-associated molecular pattern dependent modulation by organism of innate immune response in other organism involved in symbiotic interaction	1	P00433	4	0.18408	0.629567
GO:0052315	phytoalexin biosynthetic process	1	V4L1B6	4	0.18408	0.629567
GO:1902882	regulation of response to oxidative stress	1	A0A078I437	4	0.18408	0.629567
GO:0010375	stomatal complex patterning	1	V4L1B6	4	0.18408	0.629567
GO:0070084	protein initiator methionine removal	1	A0A087HN90	4	0.18408	0.629567
GO:0010188	response to microbial phytotoxin	1	A0A087GPG1	4	0.18408	0.629567
GO:0052564	response to immune response of other organism involved in symbiotic interaction	1	P00433	4	0.18408	0.629567
GO:0004827	proline-tRNA ligase activity	1	A0A0D3EAC9	4	0.18408	0.629567
GO:0052255	modulation by organism of defense response of other organism involved in symbiotic interaction	1	P00433	4	0.18408	0.629567
GO:0071732	cellular response to nitric oxide	1	A0A178URS6	4	0.18408	0.629567
GO:0043650	dicarboxylic acid biosynthetic process	3	A0A087GEG9, D7MNW6, Q9ZNZ7	30	0.184272	0.629567
GO:0016671	oxidoreductase activity, acting on a sulfur group of donors, disulfide as acceptor	3	A0A087GFX9, D7MV45, A0A087GPG1	30	0.184272	0.629567
GO:0006576	cellular biogenic amine metabolic process	3	R0FDJ8, A0A178WJZ1, A0A078FM14	30	0.184272	0.629567
GO:0010393	galacturonan metabolic process	3	V4LT85, O22256, A0A078GRZ7	30	0.184272	0.629567
GO:0045488	pectin metabolic process	3	V4LT85, O22256, A0A078GRZ7	30	0.184272	0.629567
GO:0006787	porphyrin-containing compound catabolic process	2	A0A087GKB9, A0A087G4X8	16	0.18665	0.630896
GO:0045037	protein import into chloroplast stroma	2	A0A078HQA4, A0A078J003	16	0.18665	0.630896
GO:0051187	cofactor catabolic process	2	A0A087GKB9, A0A087G4X8	16	0.18665	0.630896
GO:0033015	tetrapyrrole catabolic process	2	A0A087GKB9, A0A087G4X8	16	0.18665	0.630896
GO:0003690	double-stranded DNA binding	2	M4CP65, R0HVT6	16	0.18665	0.630896
GO:0004185	serine-type carboxypeptidase activity	2	V4P9U3, M4EM22	16	0.18665	0.630896
GO:0034357	photosynthetic membrane	23	A0A087GRU5, A0A175DDT6, A0A087GEH8, Q3ZVC8, V4L870, A0A087G4X8, V4JR39, Q8LCQ4, A0A087HIW3, A0A075M3M5, A0A078G8S3, A0A0D3D7X1, A0A087GI99, A0A087H5C5, Q6DBN2, A0A0D3A7X4, A4QJL4, D7LZC0, A0A178VQH8, V4L0Y4, R0IKM7, R0FGI7, A0A178UA59	381	0.187626	0.63307
GO:0009617	response to bacterium	11	V4LT85, A0A087GEH8, A0A0D3D7X1, V4L1B6, R0FDJ8, P00433, A0A078JT05, A0A178WJZ1, E4MXN5, A9Q115, R0FGI7	164	0.189798	0.639266
GO:0016705	oxidoreductase activity, acting on paired donors, with incorporation or reduction of molecular oxygen	5	V4L9M5, R0G495, A0A0D3C6F4, A0A0D3AG00, Q9LQ26	62	0.19232	0.645575
GO:0046658	anchored component of plasma membrane	4	A0A078CI95, V4L2R1, A0A087GPI0, A0A178V3V0	46	0.192349	0.645575
GO:0015926	glucosidase activity	3	V4LGL0, D7M9X2, A0A178URS6	31	0.197049	0.657868
GO:0031328	positive regulation of cellular biosynthetic process	3	V4L870, D7LTD9, R0I6C7	31	0.197049	0.657868
GO:0044106	cellular amine metabolic process	3	R0FDJ8, A0A178WJZ1, A0A078FM14	31	0.197049	0.657868
GO:0020037	heme binding	8	A0A175DDT6, V4L9M5, R0I486, R0G495, A0A0D3C6F4, V4KN29, A0A0D3AEV6, P00433	114	0.203532	0.6615
GO:0050660	flavin adenine dinucleotide binding	6	R0F4J2, D7L694, V4JR39, V4NYR7, Q8LFU3, A0A078IRE8	80	0.204384	0.6615
GO:0046490	isopentenyl diphosphate metabolic process	2	V4LP72, D7LFE3	17	0.205006	0.6615
GO:0009240	isopentenyl diphosphate biosynthetic process	2	V4LP72, D7LFE3	17	0.205006	0.6615
GO:0000303	response to superoxide	2	U5IB74, A9Q115	17	0.205006	0.6615
GO:0046149	pigment catabolic process	2	A0A087GKB9, A0A087G4X8	17	0.205006	0.6615
GO:0016744	transferase activity, transferring aldehyde or ketonic groups	2	A0A087H5C5, A0A178VQH8	17	0.205006	0.6615
GO:0010218	response to far red light	2	Q8LCQ4, R0IG50	17	0.205006	0.6615
GO:0071450	cellular response to oxygen radical	2	U5IB74, A9Q115	17	0.205006	0.6615
GO:0019430	removal of superoxide radicals	2	U5IB74, A9Q115	17	0.205006	0.6615
GO:0071451	cellular response to superoxide	2	U5IB74, A9Q115	17	0.205006	0.6615
GO:0044434	chloroplast part	67	A0A087GRU5, D7KNV0, A0A178V6J6, D7LF25, A0A087GEG9, O64730, Q9SIN5, D7L598, A0A078FPP2, A0A078C054, R0I6C7, R0G9G5, V4JR39, A0A078J003, V4KUK0, A0A078I437, A0A0D3D7X1, M4E415, V4LAE1, R0FGI7, A0A087GEH8, Q3ZVC8, V4L870, V4KQ77, F4HXZ3, D7MNW6, D7MV68, A0A178W0Q2, A0A0D3CQN5, A0A087HK48, Q8LCQ4, R0GFS8, D7M8K0, R0FDJ8, A4QJL4, A0A178VQH8, V4L0Y4, B9DGT7, A0A175DDT6, A0A087G4X8, D7LTD9, R0F4J2, D7L…	1230	0.208891	0.6615
GO:0009723	response to ethylene	3	R0FDJ8, A0A178WJZ1, A0A178URS6	32	0.210034	0.6615
GO:0016668	oxidoreductase activity, acting on a sulfur group of donors, NAD(P) as acceptor	3	R0F4J2, A0A087GPG1, D7L694	32	0.210034	0.6615
GO:0009505	plant-type cell wall	12	A0A078CI95, V4LT85, O22256, A0A078G2D0, D7M3J2, V4LKQ8, D7M3Z4, R0EVU0, P00433, R0HB45, A0A087HIQ4, A0A087HRE3	186	0.211557	0.6615
GO:0019682	glyceraldehyde-3-phosphate metabolic process	4	A0A087GS72, D7LFE3, D7M346, A0A178VCR4	48	0.213139	0.6615
GO:0051539	4 iron, 4 sulfur cluster binding	4	A0A078EGE6, A0A087GFX9, D7MV68, A0A087H276	48	0.213139	0.6615
GO:0016798	hydrolase activity, acting on glycosyl bonds	12	A0A0D3AEY2, A0A178V6J6, V4LKQ8, V4JQT7, D7M9X2, A0A178URS6, A0A078H9S8, R0EVU0, A0A0D3DPA9, M4DWQ5, V4LGL0, A0A087GEX4	187	0.216735	0.6615
GO:0051186	cofactor metabolic process	19	A0A078J089, V4L870, A0A087G4X8, D7LKW5, D7MNW6, A0A178VYZ1, D7L694, V4JR39, A0A087GS72, A0A087HK48, A0A0D3BFD9, D7KLH0, D7M346, A0A087GKB9, D7LYF5, V4LP72, V4MBI2, V4LAE1, A0A178VCR4	315	0.21693	0.6615
GO:0044435	plastid part	67	A0A087GRU5, A0A178V6J6, D7KNV0, D7LF25, A0A087GEG9, Q9SIN5, O64730, D7L598, A0A078FPP2, A0A078C054, V4JR39, R0I6C7, A0A078J003, R0G9G5, A0A078I437, V4KUK0, A0A0D3D7X1, M4E415, V4LAE1, R0FGI7, A0A087GEH8, Q3ZVC8, V4L870, V4KQ77, F4HXZ3, D7MNW6, D7MV68, A0A178W0Q2, A0A0D3CQN5, A0A087HK48, Q8LCQ4, R0GFS8, D7M8K0, R0FDJ8, A4QJL4, A0A178VQH8, V4L0Y4, B9DGT7, A0A175DDT6, A0A087G4X8, D7LTD9, R0F4J2, D7L…	1234	0.217407	0.6615
GO:0031976	plastid thylakoid	27	A0A087GRU5, A0A175DDT6, A0A087G4X8, D7LTD9, V4JR39, A0A087HIW3, A0A0D3D7X1, A0A087H5C5, A0A087GI99, D7LYF5, R0FGI7, A0A087GEH8, Q3ZVC8, V4L870, A0A178W0Q2, Q8LCQ4, R0GFS8, A0A075M3M5, A0A087GSJ9, A0A078G8S3, Q6DBN2, A4QJL4, A0A178VQH8, V4L0Y4, R0IKM7, A0A178UA59, V4NDH1	466	0.222105	0.6615
GO:0009534	chloroplast thylakoid	27	A0A087GRU5, A0A175DDT6, A0A087G4X8, D7LTD9, V4JR39, A0A087HIW3, A0A0D3D7X1, A0A087H5C5, A0A087GI99, D7LYF5, R0FGI7, A0A087GEH8, Q3ZVC8, V4L870, A0A178W0Q2, Q8LCQ4, A0A075M3M5, R0GFS8, A0A078G8S3, A0A087GSJ9, Q6DBN2, A4QJL4, A0A178VQH8, V4L0Y4, R0IKM7, A0A178UA59, V4NDH1	466	0.222105	0.6615
GO:0009891	positive regulation of biosynthetic process	3	V4L870, D7LTD9, R0I6C7	33	0.223201	0.6615
GO:0046653	tetrahydrofolate metabolic process	3	D7LKW5, D7MNW6, A0A178VYZ1	33	0.223201	0.6615
GO:0009637	response to blue light	2	Q8LCQ4, R0IG50	18	0.223546	0.6615
GO:0019842	vitamin binding	2	V4KUK0, G4WXD8	18	0.223546	0.6615
GO:0000305	response to oxygen radical	2	U5IB74, A9Q115	18	0.223546	0.6615
GO:0090697	post-embryonic plant organ morphogenesis	2	R0FDJ8, A0A178WJZ1	18	0.223546	0.6615
GO:0009695	jasmonic acid biosynthetic process	2	R0IJD7, A0A078DXE8	18	0.223546	0.6615
GO:1905393	plant organ formation	2	R0FDJ8, A0A178WJZ1	18	0.223546	0.6615
GO:0042538	hyperosmotic salinity response	2	A0A078I437, A0A087GZ16	18	0.223546	0.6615
GO:0000413	protein peptidyl-prolyl isomerization	4	R0GFS8, R0FCA2, A0A178UA59, V4NDH1	49	0.223762	0.6615
GO:0009081	branched-chain amino acid metabolic process	4	D7LJX7, D7MNW6, D7MV68, M4DTX0	49	0.223762	0.6615
GO:0016053	organic acid biosynthetic process	21	O24335, A0A087GEG9, D7LJX7, R0IJD7, D7MNW6, A0A078DXE8, D7MV68, A0A078FM14, V4KUK0, A0A087H276, G4WXD8, D7KLH0, A0A078EGE6, A0A078F758, A0A087GFX9, A0A0D3C4T3, R0FDJ8, A0A178WJZ1, Q9ZNZ7, A0A078CZL5, A0A087GZ16	354	0.224152	0.6615
GO:0046394	carboxylic acid biosynthetic process	21	O24335, A0A087GEG9, D7LJX7, R0IJD7, D7MNW6, A0A078DXE8, D7MV68, A0A078FM14, V4KUK0, A0A087H276, G4WXD8, D7KLH0, A0A078EGE6, A0A078F758, A0A087GFX9, A0A0D3C4T3, R0FDJ8, A0A178WJZ1, Q9ZNZ7, A0A078CZL5, A0A087GZ16	354	0.224152	0.6615
GO:0071902	positive regulation of protein serine/threonine kinase activity	1	V4L1B6	5	0.224556	0.6615
GO:0050993	dimethylallyl diphosphate metabolic process	1	V4LP72	5	0.224556	0.6615
GO:0071731	response to nitric oxide	1	A0A178URS6	5	0.224556	0.6615
GO:0050992	dimethylallyl diphosphate biosynthetic process	1	V4LP72	5	0.224556	0.6615
GO:0050829	defense response to Gram-negative bacterium	1	V4LT85	5	0.224556	0.6615
GO:0045995	regulation of embryonic development	1	D7KLH0	5	0.224556	0.6615
GO:0080119	ER body organization	1	V4LGL0	5	0.224556	0.6615
GO:0015491	cation:cation antiporter activity	1	A0A178VRQ2	5	0.224556	0.6615
GO:0006954	inflammatory response	1	Q42335	5	0.224556	0.6615
GO:0009682	induced systemic resistance	1	A0A078JT05	5	0.224556	0.6615
GO:0045860	positive regulation of protein kinase activity	1	V4L1B6	5	0.224556	0.6615
GO:0010143	cutin biosynthetic process	1	V4L9M5	5	0.224556	0.6615
GO:0071900	regulation of protein serine/threonine kinase activity	1	V4L1B6	5	0.224556	0.6615
GO:0004556	alpha-amylase activity	1	A0A178V6J6	5	0.224556	0.6615
GO:0006874	cellular calcium ion homeostasis	1	A0A178VRQ2	5	0.224556	0.6615
GO:0097054	L-glutamate biosynthetic process	1	Q9ZNZ7	5	0.224556	0.6615
GO:0005578	proteinaceous extracellular matrix	1	R0EVU0	5	0.224556	0.6615
GO:0009068	aspartate family amino acid catabolic process	1	A0A078CGS5	5	0.224556	0.6615
GO:0001934	positive regulation of protein phosphorylation	1	V4L1B6	5	0.224556	0.6615
GO:0003825	alpha,alpha-trehalose-phosphate synthase (UDP-forming) activity	1	W8Q789	5	0.224556	0.6615
GO:0043023	ribosomal large subunit binding	1	D7KNV0	5	0.224556	0.6615
GO:0016643	oxidoreductase activity, acting on the CH-NH2 group of donors, iron-sulfur protein as acceptor	1	Q9ZNZ7	5	0.224556	0.6615
GO:0072348	sulfur compound transport	1	D7M8K0	5	0.224556	0.6615
GO:0036524	protein deglycase activity	1	A0A0D3CQN5	5	0.224556	0.6615
GO:0071493	cellular response to UV-B	1	A9Q115	5	0.224556	0.6615
GO:0036525	protein deglycation	1	A0A0D3CQN5	5	0.224556	0.6615
GO:0006882	cellular zinc ion homeostasis	1	A0A178VRQ2	5	0.224556	0.6615
GO:0072505	divalent inorganic anion homeostasis	1	A0A178VRQ2	5	0.224556	0.6615
GO:0016630	protochlorophyllide reductase activity	1	A0A078IPM7	5	0.224556	0.6615
GO:0045493	xylan catabolic process	1	R0EVU0	5	0.224556	0.6615
GO:0051131	chaperone-mediated protein complex assembly	1	A0A078DVT2	5	0.224556	0.6615
GO:0016041	glutamate synthase (ferredoxin) activity	1	Q9ZNZ7	5	0.224556	0.6615
GO:0045491	xylan metabolic process	1	R0EVU0	5	0.224556	0.6615
GO:0070413	trehalose metabolism in response to stress	1	W8Q789	5	0.224556	0.6615
GO:0015238	drug transmembrane transporter activity	1	R0HHY6	5	0.224556	0.6615
GO:0055062	phosphate ion homeostasis	1	A0A178VRQ2	5	0.224556	0.6615
GO:0010363	regulation of plant-type hypersensitive response	1	A0A087GKB9	5	0.224556	0.6615
GO:0072506	trivalent inorganic anion homeostasis	1	A0A178VRQ2	5	0.224556	0.6615
GO:0004805	trehalose-phosphatase activity	1	W8Q789	5	0.224556	0.6615
GO:0042344	indole glucosinolate catabolic process	1	V4LGL0	5	0.224556	0.6615
GO:0050826	response to freezing	1	A0A078I437	5	0.224556	0.6615
GO:0035251	UDP-glucosyltransferase activity	5	W8Q789, A0A078DNP2, F4JHS0, A0A078HL16, R0HVT6	66	0.228159	0.670718
GO:0046148	pigment biosynthetic process	6	V4L870, D7LYF5, V4JR39, V4LP72, D7KLH0, A0A0D3BFD9	83	0.22839	0.670718
GO:0042170	plastid membrane	8	A0A178UMQ8, R0IG50, D7M8K0, A0A078HQA4, A4QJL4, V4JR39, A0A078I437, A0A078GNK2	118	0.230147	0.674838
GO:0098772	molecular function regulator	7	V4L5K5, O22256, V4LT85, A0A078GRZ7, A0A178VP87, R0FCA2, R0FZH3	101	0.233879	0.684726
GO:0006839	mitochondrial transport	3	D7M8K0, A0A078HQA4, A0A078DVT2	34	0.236525	0.690991
GO:0006457	protein folding	13	Q9SIL3, V4KZY2, R0G9G5, A0A078DVT2, R0GFS8, E4MYB4, Q9S9N1, D7M4F3, D7MIF8, A0A087GPG1, E4MXN5, A0A178UA59, V4NDH1	209	0.236745	0.690991
GO:0046527	glucosyltransferase activity	5	W8Q789, A0A078DNP2, F4JHS0, A0A078HL16, R0HVT6	67	0.237413	0.691878
GO:0044262	cellular carbohydrate metabolic process	11	A0A178V6J6, A0A078H9S8, V4JQT7, W8Q789, A0A078DNP2, A0A078HL16, R0HVT6, V4MRK7, A0A087GEX4, A0A178URS6, D7KLH0	173	0.238773	0.694779
GO:0016651	oxidoreductase activity, acting on NAD(P)H	7	A0A087GEH8, Q3ZVC8, A0A0D3D7X1, R0F4J2, A0A078DXE8, A0A087GPG1, D7L694	102	0.24136	0.700487
GO:0016829	lyase activity	19	M4EHZ1, R0IG50, A0A087GEG9, D7LJX7, V4KKH0, A0A087HKF2, D7MNW6, D7MV68, A0A0D3CQN5, A0A087GS72, A0A087H276, D7KLH0, A0A078EGE6, A0A075M3M5, A0A078CAC6, R0FDJ8, A0A178WA54, A0A178WJZ1, D7LZC0	321	0.241572	0.700487
GO:0004180	carboxypeptidase activity	2	V4P9U3, M4EM22	19	0.242207	0.700487
GO:0030076	light-harvesting complex	2	Q8LCQ4, D7LZC0	19	0.242207	0.700487
GO:0018208	peptidyl-proline modification	4	R0GFS8, R0FCA2, A0A178UA59, V4NDH1	51	0.245397	0.708635
GO:0009543	chloroplast thylakoid lumen	5	A0A087HIW3, R0GFS8, A0A078G8S3, A0A178UA59, V4NDH1	68	0.246769	0.71017
GO:0031978	plastid thylakoid lumen	5	A0A087HIW3, R0GFS8, A0A078G8S3, A0A178UA59, V4NDH1	68	0.246769	0.71017
GO:0098542	defense response to other organism	13	V4LT85, A0A087GEH8, Q9SIN5, A0A078JT05, D7M9X2, A9Q115, A0A087GKB9, A0A0D3BRZ5, A0A0D3D7X1, A0A178VY01, A0A087GPG1, P00433, E4MXN5	211	0.247138	0.71017
GO:0009535	chloroplast thylakoid membrane	21	A0A087GRU5, A0A087GEH8, A0A175DDT6, Q3ZVC8, V4L870, A0A087G4X8, V4JR39, Q8LCQ4, A0A087HIW3, A0A075M3M5, A0A078G8S3, A0A0D3D7X1, A0A087H5C5, Q6DBN2, A0A087GI99, A4QJL4, A0A178VQH8, V4L0Y4, R0IKM7, R0FGI7, A0A178UA59	360	0.247794	0.71017
GO:0055035	plastid thylakoid membrane	21	A0A087GRU5, A0A087GEH8, A0A175DDT6, Q3ZVC8, V4L870, A0A087G4X8, V4JR39, Q8LCQ4, A0A087HIW3, A0A075M3M5, A0A078G8S3, A0A0D3D7X1, A0A087H5C5, Q6DBN2, A0A087GI99, A4QJL4, A0A178VQH8, V4L0Y4, R0IKM7, R0FGI7, A0A178UA59	360	0.247794	0.71017
GO:0009082	branched-chain amino acid biosynthetic process	3	D7LJX7, D7MNW6, D7MV68	35	0.249983	0.712012
GO:0010604	positive regulation of macromolecule metabolic process	3	D7LTD9, V4L1B6, R0I6C7	35	0.249983	0.712012
GO:0006098	pentose-phosphate shunt	3	A0A087GS72, D7M346, A0A178VCR4	35	0.249983	0.712012
GO:0051156	glucose 6-phosphate metabolic process	3	A0A087GS72, D7M346, A0A178VCR4	35	0.249983	0.712012
GO:0044710	single-organism metabolic process	112	A0A078J089, A0A078CGS5, D7LF25, A0A087GEG9, V4P9U3, D7L598, V4NYR7, V4KUK0, A0A078I437, M4DTX0, A9Q115, A0A078EGE6, V4KJE9, R0FGI7, R0INE7, A0A087GEH8, V4L870, D7MNW6, A0A087GN96, D7MV68, U5IB74, A0A087H276, V4L1B6, R0FDJ8, V4LP72, V4MBI2, A0A087GZ16, A0A175DDT6, A0A087G4X8, D7LKW5, A0A178VMR4, A0A178VYZ1, D7LFE3, D7M346, G4WXD8, A0A0D3BFD9, A0A0D3AEV6, A0A087GPG1, A0A078IRE8, M4EHZ1, A0A178VP87,…	2142	0.258233	0.712012
GO:0065008	regulation of biological quality	19	A0A087FY81, D7LF25, V4KQ77, R0F4J2, D7L598, A0A078FPP2, D7L694, A0A178VRQ2, A0A078I437, A0A178UV43, D7KLH0, A0A078FU68, A0A087GFX9, R0FDJ8, A0A087GPG1, A0A178WJZ1, P00433, A0A087GGA8, R0FGI7	325	0.258629	0.712012
GO:0070008	serine-type exopeptidase activity	2	V4P9U3, M4EM22	20	0.260932	0.712012
GO:0004707	MAP kinase activity	1	V4L1B6	6	0.263029	0.712012
GO:0006072	glycerol-3-phosphate metabolic process	1	A0A078DDG3	6	0.263029	0.712012
GO:1902930	regulation of alcohol biosynthetic process	1	V4L870	6	0.263029	0.712012
GO:0005853	eukaryotic translation elongation factor 1 complex	1	A0A087G6I6	6	0.263029	0.712012
GO:0009833	plant-type primary cell wall biogenesis	1	R0HVT6	6	0.263029	0.712012
GO:0004133	glycogen debranching enzyme activity	1	A0A178V6J6	6	0.263029	0.712012
GO:0006524	alanine catabolic process	1	A0A178WAU5	6	0.263029	0.712012
GO:0042853	L-alanine catabolic process	1	A0A178WAU5	6	0.263029	0.712012
GO:0009080	pyruvate family amino acid catabolic process	1	A0A178WAU5	6	0.263029	0.712012
GO:0055069	zinc ion homeostasis	1	A0A178VRQ2	6	0.263029	0.712012
GO:0031012	extracellular matrix	1	R0EVU0	6	0.263029	0.712012
GO:0019208	phosphatase regulator activity	1	R0FCA2	6	0.263029	0.712012
GO:0045298	tubulin complex	1	B9DGT7	6	0.263029	0.712012
GO:0046373	L-arabinose metabolic process	1	V4LKQ8	6	0.263029	0.712012
GO:0055129	L-proline biosynthetic process	1	A0A087GZ16	6	0.263029	0.712012
GO:0034644	cellular response to UV	1	A9Q115	6	0.263029	0.712012
GO:0008113	peptide-methionine (S)-S-oxide reductase activity	1	D7MV45	6	0.263029	0.712012
GO:0042851	L-alanine metabolic process	1	A0A178WAU5	6	0.263029	0.712012
GO:0042644	chloroplast nucleoid	1	V4L0Y4	6	0.263029	0.712012
GO:0006532	aspartate biosynthetic process	1	D7MNW6	6	0.263029	0.712012
GO:0015171	amino acid transmembrane transporter activity	1	A0A078HQA4	6	0.263029	0.712012
GO:0071484	cellular response to light intensity	1	A9Q115	6	0.263029	0.712012
GO:0009346	citrate lyase complex	1	D7KLH0	6	0.263029	0.712012
GO:0070301	cellular response to hydrogen peroxide	1	A0A0D3CQN5	6	0.263029	0.712012
GO:0090484	drug transporter activity	1	R0HHY6	6	0.263029	0.712012
GO:0006522	alanine metabolic process	1	A0A178WAU5	6	0.263029	0.712012
GO:0009078	pyruvate family amino acid metabolic process	1	A0A178WAU5	6	0.263029	0.712012
GO:0052646	alditol phosphate metabolic process	1	A0A078DDG3	6	0.263029	0.712012
GO:0034308	primary alcohol metabolic process	1	V4L870	6	0.263029	0.712012
GO:0030150	protein import into mitochondrial matrix	1	A0A078HQA4	6	0.263029	0.712012
GO:0006531	aspartate metabolic process	1	D7MNW6	6	0.263029	0.712012
GO:0003878	ATP citrate synthase activity	1	D7KLH0	6	0.263029	0.712012
GO:0015035	protein disulfide oxidoreductase activity	3	A0A078FU68, D7L598, A0A087GPG1	36	0.263552	0.712415
GO:0009055	electron carrier activity	7	A0A087GEH8, A0A175DDT6, A0A078FU68, D7L598, A0A178V3V0, V4NYR7, A0A078IRE8	105	0.264241	0.713263
GO:0016758	transferase activity, transferring hexosyl groups	8	A0A178UMQ8, W8Q789, A0A078DNP2, A0A0D3B5A4, F4JHS0, A0A078HL16, R0HVT6, A0A087GEX4	123	0.265024	0.714365
GO:0031984	organelle subcompartment	31	A0A087GRU5, A0A175DDT6, A0A087G4X8, D7LTD9, A0A087GEG9, V4JR39, A0A087HIW3, A0A0D3D7X1, D7M3J2, A0A087H5C5, A0A087GI99, V4K8F1, D7LYF5, R0FGI7, A0A087GEH8, Q3ZVC8, V4L870, A0A178W0Q2, Q8LCQ4, R0GFS8, A0A075M3M5, A0A087GSJ9, A0A078G8S3, Q6DBN2, A4QJL4, A0A178VQH8, V4L0Y4, R0HVT6, R0IKM7, A0A178UA59, V4NDH1	555	0.265562	0.714801
GO:0003755	peptidyl-prolyl cis-trans isomerase activity	4	R0GFS8, R0FCA2, A0A178UA59, V4NDH1	53	0.267471	0.718922
GO:0009108	coenzyme biosynthetic process	6	A0A078J089, D7MNW6, D7L694, A0A087HK48, V4LAE1, D7KLH0	88	0.270217	0.72528
GO:0006739	NADP metabolic process	3	A0A087GS72, D7M346, A0A178VCR4	37	0.27721	0.72629
GO:0042545	cell wall modification	3	V4LT85, O22256, A0A078GRZ7	37	0.27721	0.72629
GO:0009851	auxin biosynthetic process	2	R0FDJ8, A0A178WJZ1	21	0.279668	0.72629
GO:0006801	superoxide metabolic process	2	U5IB74, A9Q115	21	0.279668	0.72629
GO:0010383	cell wall polysaccharide metabolic process	2	R0EVU0, A0A087GEX4	21	0.279668	0.72629
GO:0009705	plant-type vacuole membrane	2	A0A087HBX3, A0A178VRQ2	21	0.279668	0.72629
GO:0048527	lateral root development	2	R0FDJ8, A0A178WJZ1	21	0.279668	0.72629
GO:0015297	antiporter activity	2	A0A078DLK4, A0A178VRQ2	21	0.279668	0.72629
GO:0010114	response to red light	2	Q8LCQ4, R0IG50	21	0.279668	0.72629
GO:0016840	carbon-nitrogen lyase activity	2	V4KKH0, A0A178WA54	21	0.279668	0.72629
GO:0010207	photosystem II assembly	2	R0GFS8, V4NDH1	21	0.279668	0.72629
GO:0070925	organelle assembly	2	Q9FJZ2, A0A078DWY1	21	0.279668	0.72629
GO:0016757	transferase activity, transferring glycosyl groups	10	A0A178UMQ8, A0A087GJJ7, W8Q789, A0A0D3B5A4, A0A078DNP2, F4JHS0, A0A078HL16, R0HVT6, A0A087GEX4, D7MH74	162	0.282498	0.72629
GO:0016853	isomerase activity	12	A0A078GWC7, R0GFS8, A0A078HHR9, R0IJD7, D7MV68, A0A078FM14, V4LP72, R0FCA2, A0A0D3BFD9, A0A178UA59, V4NDH1, A0A178VCR4	199	0.282635	0.72629
GO:0006720	isoprenoid metabolic process	5	V4L870, A0A087GN96, V4LP72, D7KLH0, D7LFE3	72	0.28506	0.72629
GO:0009414	response to water deprivation	7	R0INE7, V4KJE9, V4MA11, O22809, A0A078I437, A0A087GGA8, A0A087GEX4	108	0.287698	0.72629
GO:0006790	sulfur compound metabolic process	15	A0A078J089, D7LKW5, D7LJX7, A0A178VYZ1, D7MV68, D7L694, R0ETD5, A0A087HK48, D7KLH0, A0A178UMQ8, A0A087GFX9, V4L1B6, V4LGL0, V4MBI2, V4LAE1	257	0.292752	0.72629
GO:0006952	defense response	18	A0A087HQR6, V4LT85, A0A087GEH8, Q9SIN5, Q42335, A0A078JT05, D7M9X2, A9Q115, R0FZH3, A0A087GKB9, A0A0D3BRZ5, A0A0D3D7X1, A0A178VY01, A0A087GPG1, P00433, V4LGL0, R0HVT6, E4MXN5	314	0.294065	0.72629
GO:0030234	enzyme regulator activity	6	V4L5K5, O22256, V4LT85, A0A078GRZ7, A0A178VP87, R0FCA2	91	0.29617	0.72629
GO:0031977	thylakoid lumen	6	A0A087HIW3, R0GFS8, A0A078G8S3, A0A087GEH8, A0A178UA59, V4NDH1	91	0.29617	0.72629
GO:0043021	ribonucleoprotein complex binding	2	D7KNV0, Q9FJZ2	22	0.298368	0.72629
GO:1990542	mitochondrial transmembrane transport	2	A0A078HQA4, A0A078DVT2	22	0.298368	0.72629
GO:0016709	oxidoreductase activity, acting on paired donors, with incorporation or reduction of molecular oxygen, NAD(P)H as one donor, and incorporation of one atom of oxygen	2	V4L9M5, Q9LQ26	22	0.298368	0.72629
GO:0010150	leaf senescence	2	O24335, Q9SIN5	22	0.298368	0.72629
GO:0090693	plant organ senescence	2	O24335, Q9SIN5	22	0.298368	0.72629
GO:0004034	aldose 1-epimerase activity	1	A0A078HHR9	7	0.299599	0.72629
GO:0048831	regulation of shoot system development	1	D7KLH0	7	0.299599	0.72629
GO:0016760	cellulose synthase (UDP-forming) activity	1	R0HVT6	7	0.299599	0.72629
GO:0009556	microsporogenesis	1	V4MBI2	7	0.299599	0.72629
GO:0042436	indole-containing compound catabolic process	1	V4LGL0	7	0.299599	0.72629
GO:0031304	intrinsic component of mitochondrial inner membrane	1	A0A078HQA4	7	0.299599	0.72629
GO:0006342	chromatin silencing	1	A0A178VMR4	7	0.299599	0.72629
GO:1902531	regulation of intracellular signal transduction	1	V4L1B6	7	0.299599	0.72629
GO:0008139	nuclear localization sequence binding	1	D7LZC0	7	0.299599	0.72629
GO:0050918	positive chemotaxis	1	V4L1B6	7	0.299599	0.72629
GO:0004427	inorganic diphosphatase activity	1	M4EIL0	7	0.299599	0.72629
GO:0046688	response to copper ion	1	A9Q115	7	0.299599	0.72629
GO:0031401	positive regulation of protein modification process	1	V4L1B6	7	0.299599	0.72629
GO:0003713	transcription coactivator activity	1	A0A0D3CQN5	7	0.299599	0.72629
GO:0004350	glutamate-5-semialdehyde dehydrogenase activity	1	A0A087GZ16	7	0.299599	0.72629
GO:0004021	L-alanine:2-oxoglutarate aminotransferase activity	1	A0A178WAU5	7	0.299599	0.72629
GO:0070006	metalloaminopeptidase activity	1	A0A087HN90	7	0.299599	0.72629
GO:0009247	glycolipid biosynthetic process	1	A0A178UMQ8	7	0.299599	0.72629
GO:0009975	cyclase activity	1	R0IJD7	7	0.299599	0.72629
GO:0042973	glucan endo-1,3-beta-D-glucosidase activity	1	D7M9X2	7	0.299599	0.72629
GO:0015266	protein channel activity	1	A0A078HQA4	7	0.299599	0.72629
GO:0044003	modification by symbiont of host morphology or physiology	1	P00433	7	0.299599	0.72629
GO:0019566	arabinose metabolic process	1	V4LKQ8	7	0.299599	0.72629
GO:0042327	positive regulation of phosphorylation	1	V4L1B6	7	0.299599	0.72629
GO:0006607	NLS-bearing protein import into nucleus	1	D7LZC0	7	0.299599	0.72629
GO:0010562	positive regulation of phosphorus metabolic process	1	V4L1B6	7	0.299599	0.72629
GO:0004349	glutamate 5-kinase activity	1	A0A087GZ16	7	0.299599	0.72629
GO:0033674	positive regulation of kinase activity	1	V4L1B6	7	0.299599	0.72629
GO:0042330	taxis	1	V4L1B6	7	0.299599	0.72629
GO:0045937	positive regulation of phosphate metabolic process	1	V4L1B6	7	0.299599	0.72629
GO:0010380	regulation of chlorophyll biosynthetic process	1	V4L870	7	0.299599	0.72629
GO:0008146	sulfotransferase activity	1	A0A0D3CX35	7	0.299599	0.72629
GO:0006935	chemotaxis	1	V4L1B6	7	0.299599	0.72629
GO:0006865	amino acid transport	1	A0A078HQA4	7	0.299599	0.72629
GO:0031365	N-terminal protein amino acid modification	1	A0A087HN90	7	0.299599	0.72629
GO:0004324	ferredoxin-NADP+ reductase activity	1	A0A087GEH8	7	0.299599	0.72629
GO:0016731	oxidoreductase activity, acting on iron-sulfur proteins as donors, NAD or NADP as acceptor	1	A0A087GEH8	7	0.299599	0.72629
GO:0000028	ribosomal small subunit assembly	1	Q9FJZ2	7	0.299599	0.72629
GO:0009399	nitrogen fixation	1	O24335	7	0.299599	0.72629
GO:0046910	pectinesterase inhibitor activity	1	V4LT85	7	0.299599	0.72629
GO:0010183	pollen tube guidance	1	V4L1B6	7	0.299599	0.72629
GO:0055074	calcium ion homeostasis	1	A0A178VRQ2	7	0.299599	0.72629
GO:0000165	MAPK cascade	1	V4L1B6	7	0.299599	0.72629
GO:0045041	protein import into mitochondrial intermembrane space	1	A0A078DVT2	7	0.299599	0.72629
GO:1901463	regulation of tetrapyrrole biosynthetic process	1	V4L870	7	0.299599	0.72629
GO:0009044	xylan 1,4-beta-xylosidase activity	1	R0EVU0	7	0.299599	0.72629
GO:0019172	glyoxalase III activity	1	A0A0D3CQN5	7	0.299599	0.72629
GO:0047635	alanine-oxo-acid transaminase activity	1	A0A178WAU5	7	0.299599	0.72629
GO:0009909	regulation of flower development	1	D7KLH0	7	0.299599	0.72629
GO:0000027	ribosomal large subunit assembly	1	A0A078DWY1	7	0.299599	0.72629
GO:0045814	negative regulation of gene expression, epigenetic	1	A0A178VMR4	7	0.299599	0.72629
GO:1901607	alpha-amino acid biosynthetic process	12	O24335, D7LJX7, D7MNW6, D7MV68, A0A078FM14, A0A087GFX9, A0A0D3C4T3, R0FDJ8, A0A178WJZ1, Q9ZNZ7, A0A078CZL5, A0A087GZ16	202	0.300032	0.726414
GO:0016859	cis-trans isomerase activity	4	R0GFS8, R0FCA2, A0A178UA59, V4NDH1	56	0.30119	0.727366
GO:0009084	glutamine family amino acid biosynthetic process	4	O24335, A0A0D3C4T3, Q9ZNZ7, A0A087GZ16	56	0.30119	0.727366
GO:0010558	negative regulation of macromolecule biosynthetic process	3	M4CP65, A0A178VMR4, A9Q115	39	0.304706	0.731218
GO:0022803	passive transmembrane transporter activity	3	A0A078I000, A0A078HQA4, A0A087GGA8	39	0.304706	0.731218
GO:0015267	channel activity	3	A0A078I000, A0A078HQA4, A0A087GGA8	39	0.304706	0.731218
GO:0006760	folic acid-containing compound metabolic process	3	D7LKW5, D7MNW6, A0A178VYZ1	39	0.304706	0.731218
GO:2000113	negative regulation of cellular macromolecule biosynthetic process	3	M4CP65, A0A178VMR4, A9Q115	39	0.304706	0.731218
GO:0009415	response to water	7	R0INE7, V4KJE9, V4MA11, O22809, A0A078I437, A0A087GGA8, A0A087GEX4	111	0.311624	0.746878
GO:0009817	defense response to fungus, incompatible interaction	2	A0A0D3D7X1, D7M9X2	23	0.31699	0.749353
GO:0009615	response to virus	2	E4MYB4, Q9S9N1	23	0.31699	0.749353
GO:0048646	anatomical structure formation involved in morphogenesis	2	R0FDJ8, A0A178WJZ1	23	0.31699	0.749353
GO:0007568	aging	3	O24335, Q9SIN5, D7KLH0	40	0.318505	0.749353
GO:0048522	positive regulation of cellular process	5	V4L870, D7LTD9, V4L1B6, A0A178VMR4, R0I6C7	76	0.324371	0.749353
GO:0009409	response to cold	9	A0A078F758, Q9SIN5, V4L1B6, A0A078HQA4, V4MXR1, V4LGL0, A0A178VRQ2, A0A078I437, R0FGI7	150	0.326302	0.749353
GO:0009636	response to toxic substance	7	A0A087GRU5, A0A0D3AEV6, A0A087GPG1, P00433, F4JHS0, U5IB74, A9Q115	113	0.327781	0.749353
GO:0042558	pteridine-containing compound metabolic process	3	D7LKW5, D7MNW6, A0A178VYZ1	41	0.332312	0.749353
GO:0000325	plant-type vacuole	3	A0A087HBX3, R0HHY6, A0A178VRQ2	41	0.332312	0.749353
GO:0009308	amine metabolic process	3	R0FDJ8, A0A178WJZ1, A0A078FM14	41	0.332312	0.749353
GO:1990748	cellular detoxification	5	A0A087GRU5, A0A0D3AEV6, P00433, U5IB74, A9Q115	77	0.334302	0.749353
GO:0005759	mitochondrial matrix	5	A0A078J089, A0A178VP87, A0A078DWY1, Q9ZNZ7, A0A078DVT2	77	0.334302	0.749353
GO:0098869	cellular oxidant detoxification	5	A0A087GRU5, A0A0D3AEV6, P00433, U5IB74, A9Q115	77	0.334302	0.749353
GO:0015928	fucosidase activity	1	V4LGL0	8	0.33436	0.749353
GO:0048236	plant-type sporogenesis	1	V4MBI2	8	0.33436	0.749353
GO:0000038	very long-chain fatty acid metabolic process	1	A0A078F758	8	0.33436	0.749353
GO:0009992	cellular water homeostasis	1	A0A087GGA8	8	0.33436	0.749353
GO:0010014	meristem initiation	1	A0A178W7K7	8	0.33436	0.749353
GO:0046654	tetrahydrofolate biosynthetic process	1	D7MNW6	8	0.33436	0.749353
GO:0015166	polyol transmembrane transporter activity	1	A0A087GGA8	8	0.33436	0.749353
GO:0015665	alcohol transmembrane transporter activity	1	A0A087GGA8	8	0.33436	0.749353
GO:0015254	glycerol channel activity	1	A0A087GGA8	8	0.33436	0.749353
GO:0010243	response to organonitrogen compound	1	V4L1B6	8	0.33436	0.749353
GO:0046417	chorismate metabolic process	1	A0A087GEG9	8	0.33436	0.749353
GO:1905039	carboxylic acid transmembrane transport	1	A0A078HQA4	8	0.33436	0.749353
GO:0016863	intramolecular oxidoreductase activity, transposing C=C bonds	1	V4LP72	8	0.33436	0.749353
GO:0015930	glutamate synthase activity	1	Q9ZNZ7	8	0.33436	0.749353
GO:0040011	locomotion	1	V4L1B6	8	0.33436	0.749353
GO:0045859	regulation of protein kinase activity	1	V4L1B6	8	0.33436	0.749353
GO:0048508	embryonic meristem development	1	A0A178W7K7	8	0.33436	0.749353
GO:0010072	primary shoot apical meristem specification	1	A0A178W7K7	8	0.33436	0.749353
GO:2000038	regulation of stomatal complex development	1	V4L1B6	8	0.33436	0.749353
GO:0000059	protein import into nucleus, docking	1	D7LZC0	8	0.33436	0.749353
GO:0009569	chloroplast starch grain	1	A0A178V6J6	8	0.33436	0.749353
GO:0097599	xylanase activity	1	R0EVU0	8	0.33436	0.749353
GO:0043036	starch grain	1	A0A178V6J6	8	0.33436	0.749353
GO:0006537	glutamate biosynthetic process	1	Q9ZNZ7	8	0.33436	0.749353
GO:0090421	embryonic meristem initiation	1	A0A178W7K7	8	0.33436	0.749353
GO:0016759	cellulose synthase activity	1	R0HVT6	8	0.33436	0.749353
GO:0032544	plastid translation	1	D7LTD9	8	0.33436	0.749353
GO:0009423	chorismate biosynthetic process	1	A0A087GEG9	8	0.33436	0.749353
GO:0034293	sexual sporulation	1	V4MBI2	8	0.33436	0.749353
GO:0019137	thioglucosidase activity	1	V4LGL0	8	0.33436	0.749353
GO:0051701	interaction with host	1	P00433	8	0.33436	0.749353
GO:0015168	glycerol transmembrane transporter activity	1	A0A087GGA8	8	0.33436	0.749353
GO:1903825	organic acid transmembrane transport	1	A0A078HQA4	8	0.33436	0.749353
GO:0090056	regulation of chlorophyll metabolic process	1	V4L870	8	0.33436	0.749353
GO:0051817	modification of morphology or physiology of other organism involved in symbiotic interaction	1	P00433	8	0.33436	0.749353
GO:0043934	sporulation	1	V4MBI2	8	0.33436	0.749353
GO:0006884	cell volume homeostasis	1	A0A087GGA8	8	0.33436	0.749353
GO:1903507	negative regulation of nucleic acid-templated transcription	2	M4CP65, A0A178VMR4	24	0.335496	0.749353
GO:0044421	extracellular region part	2	R0EVU0, D7M9X2	24	0.335496	0.749353
GO:0051248	negative regulation of protein metabolic process	2	V4L5K5, A9Q115	24	0.335496	0.749353
GO:0032269	negative regulation of cellular protein metabolic process	2	V4L5K5, A9Q115	24	0.335496	0.749353
GO:0010557	positive regulation of macromolecule biosynthetic process	2	D7LTD9, R0I6C7	24	0.335496	0.749353
GO:0045892	negative regulation of transcription, DNA-templated	2	M4CP65, A0A178VMR4	24	0.335496	0.749353
GO:0098552	side of membrane	2	V4L0Y4, A0A078I437	24	0.335496	0.749353
GO:1902679	negative regulation of RNA biosynthetic process	2	M4CP65, A0A178VMR4	24	0.335496	0.749353
GO:0031225	anchored component of membrane	4	A0A078CI95, V4L2R1, A0A087GPI0, A0A178V3V0	60	0.3468	0.770005
GO:0031969	chloroplast membrane	7	A0A178UMQ8, R0IG50, D7M8K0, A0A078HQA4, V4JR39, A0A078I437, A0A078GNK2	116	0.352247	0.770005
GO:0070585	protein localization to mitochondrion	2	A0A078HQA4, A0A078DVT2	25	0.353852	0.770005
GO:0035999	tetrahydrofolate interconversion	2	D7LKW5, A0A178VYZ1	25	0.353852	0.770005
GO:0016407	acetyltransferase activity	2	A0A0D3C4T3, V4LD01	25	0.353852	0.770005
GO:0006626	protein targeting to mitochondrion	2	A0A078HQA4, A0A078DVT2	25	0.353852	0.770005
GO:0043565	sequence-specific DNA binding	2	M4CP65, R0HVT6	25	0.353852	0.770005
GO:0051253	negative regulation of RNA metabolic process	2	M4CP65, A0A178VMR4	25	0.353852	0.770005
GO:0072655	establishment of protein localization to mitochondrion	2	A0A078HQA4, A0A078DVT2	25	0.353852	0.770005
GO:0090698	post-embryonic plant morphogenesis	2	R0FDJ8, A0A178WJZ1	25	0.353852	0.770005
GO:0044283	small molecule biosynthetic process	23	O24335, V4L870, A0A087GEG9, D7LJX7, R0IJD7, D7MNW6, A0A078DXE8, D7MV68, A0A078FM14, V4JR39, V4KUK0, A0A087H276, G4WXD8, D7KLH0, A0A078EGE6, A0A078F758, A0A087GFX9, A0A0D3C4T3, R0FDJ8, A0A178WJZ1, Q9ZNZ7, A0A078CZL5, A0A087GZ16	424	0.356109	0.770005
GO:0045454	cell redox homeostasis	6	A0A078FU68, A0A087GFX9, R0F4J2, D7L598, A0A087GPG1, D7L694	98	0.358287	0.770005
GO:2000026	regulation of multicellular organismal development	3	A0A087HKF2, V4L1B6, D7KLH0	43	0.359881	0.770005
GO:0016114	terpenoid biosynthetic process	3	V4L870, D7KLH0, D7LFE3	43	0.359881	0.770005
GO:0046906	tetrapyrrole binding	9	Q8LCQ4, A0A175DDT6, V4L9M5, R0I486, R0G495, A0A0D3C6F4, V4KN29, A0A0D3AEV6, P00433	155	0.361693	0.770005
GO:0098754	detoxification	5	A0A087GRU5, A0A0D3AEV6, P00433, U5IB74, A9Q115	80	0.364227	0.770005
GO:0016836	hydro-lyase activity	6	A0A078EGE6, A0A078CAC6, D7LJX7, D7MV68, A0A0D3CQN5, A0A087H276	99	0.367263	0.770005
GO:0051240	positive regulation of multicellular organismal process	1	D7KLH0	9	0.367401	0.770005
GO:0010466	negative regulation of peptidase activity	1	V4L5K5	9	0.367401	0.770005
GO:0010229	inflorescence development	1	V4L1B6	9	0.367401	0.770005
GO:0016838	carbon-oxygen lyase activity, acting on phosphates	1	A0A087GEG9	9	0.367401	0.770005
GO:1901401	regulation of tetrapyrrole metabolic process	1	V4L870	9	0.367401	0.770005
GO:0005762	mitochondrial large ribosomal subunit	1	A0A078DWY1	9	0.367401	0.770005
GO:0032392	DNA geometric change	1	V4MXR1	9	0.367401	0.770005
GO:0004866	endopeptidase inhibitor activity	1	V4L5K5	9	0.367401	0.770005
GO:0032508	DNA duplex unwinding	1	V4MXR1	9	0.367401	0.770005
GO:0048582	positive regulation of post-embryonic development	1	D7KLH0	9	0.367401	0.770005
GO:0002253	activation of immune response	1	A0A078JT05	9	0.367401	0.770005
GO:0035195	gene silencing by miRNA	1	A9Q115	9	0.367401	0.770005
GO:0071395	cellular response to jasmonic acid stimulus	1	A0A078JT05	9	0.367401	0.770005
GO:0061135	endopeptidase regulator activity	1	V4L5K5	9	0.367401	0.770005
GO:0030104	water homeostasis	1	A0A087GGA8	9	0.367401	0.770005
GO:0009769	photosynthesis, light harvesting in photosystem II	1	A0A175DDT6	9	0.367401	0.770005
GO:0016762	xyloglucan:xyloglucosyl transferase activity	1	A0A087GEX4	9	0.367401	0.770005
GO:1901264	carbohydrate derivative transport	1	R0HHY6	9	0.367401	0.770005
GO:0010951	negative regulation of endopeptidase activity	1	V4L5K5	9	0.367401	0.770005
GO:0004617	phosphoglycerate dehydrogenase activity	1	A0A078CZL5	9	0.367401	0.770005
GO:0004702	signal transducer, downstream of receptor, with serine/threonine kinase activity	1	V4L1B6	9	0.367401	0.770005
GO:0009867	jasmonic acid mediated signaling pathway	1	A0A078JT05	9	0.367401	0.770005
GO:0034399	nuclear periphery	1	D7LZC0	9	0.367401	0.770005
GO:0051193	regulation of cofactor metabolic process	1	V4L870	9	0.367401	0.770005
GO:0008171	O-methyltransferase activity	1	A0A078F7S0	9	0.367401	0.770005
GO:1901618	organic hydroxy compound transmembrane transporter activity	1	A0A087GGA8	9	0.367401	0.770005
GO:0002218	activation of innate immune response	1	A0A078JT05	9	0.367401	0.770005
GO:0072503	cellular divalent inorganic cation homeostasis	1	A0A178VRQ2	9	0.367401	0.770005
GO:0010304	PSII associated light-harvesting complex II catabolic process	1	A0A087G4X8	9	0.367401	0.770005
GO:0046915	transition metal ion transmembrane transporter activity	1	A0A178UV43	9	0.367401	0.770005
GO:0004712	protein serine/threonine/tyrosine kinase activity	1	V4NCN6	9	0.367401	0.770005
GO:0052548	regulation of endopeptidase activity	1	V4L5K5	9	0.367401	0.770005
GO:0051052	regulation of DNA metabolic process	1	A0A178VMR4	9	0.367401	0.770005
GO:0005057	signal transducer activity, downstream of receptor	1	V4L1B6	9	0.367401	0.770005
GO:0043549	regulation of kinase activity	1	V4L1B6	9	0.367401	0.770005
GO:0042343	indole glucosinolate metabolic process	1	V4LGL0	9	0.367401	0.770005
GO:0030127	COPII vesicle coat	1	A0A078BVL6	9	0.367401	0.770005
GO:0071949	FAD binding	1	Q8LFU3	9	0.367401	0.770005
GO:0052547	regulation of peptidase activity	1	V4L5K5	9	0.367401	0.770005
GO:0016830	carbon-carbon lyase activity	8	A0A075M3M5, M4EHZ1, R0IG50, A0A087HKF2, D7MNW6, R0FDJ8, A0A178WJZ1, A0A087GS72	137	0.369071	0.772654
GO:0019758	glycosinolate biosynthetic process	2	D7LJX7, D7MV68	26	0.372027	0.775429
GO:0042446	hormone biosynthetic process	2	R0FDJ8, A0A178WJZ1	26	0.372027	0.775429
GO:0019761	glucosinolate biosynthetic process	2	D7LJX7, D7MV68	26	0.372027	0.775429
GO:0016144	S-glycoside biosynthetic process	2	D7LJX7, D7MV68	26	0.372027	0.775429
GO:0010015	root morphogenesis	3	D7M3Z4, R0FDJ8, A0A178WJZ1	44	0.37361	0.77618
GO:0051172	negative regulation of nitrogen compound metabolic process	3	M4CP65, A0A178VMR4, A9Q115	44	0.37361	0.77618
GO:0006541	glutamine metabolic process	3	O24335, A0A178WJZ1, Q9ZNZ7	44	0.37361	0.77618
GO:0015977	carbon fixation	5	A0A075M3M5, M4EHZ1, R0IG50, A0A087H5C5, A0A178VQH8	81	0.374223	0.776605
GO:0048046	apoplast	18	A0A078CI95, A0A087GEH8, R0IG50, D7LTD9, A0A087HKF2, A0A087GS72, D7M9X2, A0A075M3M5, V4L5K5, A0A078FU68, A0A0D3D7X1, A0A078G2D0, R0EVU0, A0A087GPG1, P00433, Q9ZNZ7, R0G8R2, A0A087GEX4	333	0.386153	0.800215
GO:0016984	ribulose-bisphosphate carboxylase activity	3	A0A075M3M5, M4EHZ1, R0IG50	45	0.387282	0.800215
GO:0044743	protein transmembrane import into intracellular organelle	3	A0A078HQA4, A0A078J003, A0A078DVT2	45	0.387282	0.800215
GO:0031327	negative regulation of cellular biosynthetic process	3	M4CP65, A0A178VMR4, A9Q115	45	0.387282	0.800215
GO:0048528	post-embryonic root development	2	R0FDJ8, A0A178WJZ1	27	0.389993	0.802332
GO:0009850	auxin metabolic process	2	R0FDJ8, A0A178WJZ1	27	0.389993	0.802332
GO:0010628	positive regulation of gene expression	2	D7LTD9, R0I6C7	27	0.389993	0.802332
GO:0019252	starch biosynthetic process	2	A0A078HL16, D7KLH0	27	0.389993	0.802332
GO:0032787	monocarboxylic acid metabolic process	19	A0A078J089, D7L9G8, R0IJD7, D7MNW6, A0A078DXE8, A0A078JT05, D7L694, A0A0D3CQN5, V4KUK0, A0A087GS72, A0A087HK48, G4WXD8, D7KLH0, D7LFE3, A0A078F758, V4L9M5, A0A0D3AG00, F4JHS0, V4LAE1	354	0.393252	0.804803
GO:0016051	carbohydrate biosynthetic process	9	A0A075M3M5, M4EHZ1, R0IG50, A0A087H5C5, W8Q789, A0A178VQH8, A0A078HL16, R0HVT6, D7KLH0	160	0.397506	0.804803
GO:0019747	regulation of isoprenoid metabolic process	1	V4L870	10	0.398807	0.804803
GO:0051346	negative regulation of hydrolase activity	1	V4L5K5	10	0.398807	0.804803
GO:0042335	cuticle development	1	A0A078F758	10	0.398807	0.804803
GO:0032040	small-subunit processome	1	V4MXR1	10	0.398807	0.804803
GO:0046501	protoporphyrinogen IX metabolic process	1	A0A0D3BFD9	10	0.398807	0.804803
GO:0006782	protoporphyrinogen IX biosynthetic process	1	A0A0D3BFD9	10	0.398807	0.804803
GO:0010214	seed coat development	1	R0EVU0	10	0.398807	0.804803
GO:0005992	trehalose biosynthetic process	1	W8Q789	10	0.398807	0.804803
GO:0031965	nuclear membrane	1	D7LZC0	10	0.398807	0.804803
GO:0000790	nuclear chromatin	1	A0A178VMR4	10	0.398807	0.804803
GO:0030162	regulation of proteolysis	1	V4L5K5	10	0.398807	0.804803
GO:0042273	ribosomal large subunit biogenesis	1	A0A078DWY1	10	0.398807	0.804803
GO:0045861	negative regulation of proteolysis	1	V4L5K5	10	0.398807	0.804803
GO:0006261	DNA-dependent DNA replication	1	M4CP65	10	0.398807	0.804803
GO:0001932	regulation of protein phosphorylation	1	V4L1B6	10	0.398807	0.804803
GO:0004030	aldehyde dehydrogenase [NAD(P)+] activity	1	V4MBI2	10	0.398807	0.804803
GO:0065002	intracellular protein transmembrane transport	3	A0A078HQA4, A0A078J003, A0A078DVT2	46	0.400882	0.808134
GO:0019684	photosynthesis, light reaction	7	Q8LCQ4, R0GFS8, A0A087GEH8, A0A175DDT6, Q3ZVC8, V4L870, V4NDH1	122	0.401621	0.808706
GO:0009735	response to cytokinin	10	A0A0D3D7X1, D7LTD9, F4HXZ3, D7L598, A0A087GPG1, P00433, V4LGL0, A0A087GS72, A0A078I437, R0FGI7	180	0.402016	0.808706
GO:0031226	intrinsic component of plasma membrane	5	A0A078CI95, V4L2R1, A0A087GPI0, A0A178V3V0, A0A087GGA8	84	0.404184	0.812209
GO:0006090	pyruvate metabolic process	6	A0A078J089, D7L694, A0A087GS72, A0A087HK48, V4LAE1, D7LFE3	104	0.412202	0.827448
GO:0051239	regulation of multicellular organismal process	3	A0A087HKF2, V4L1B6, D7KLH0	47	0.414397	0.830102
GO:0009250	glucan biosynthetic process	3	A0A078HL16, R0HVT6, D7KLH0	47	0.414397	0.830102
GO:0019843	rRNA binding	4	A0A075M3M5, D7LTD9, Q9FJZ2, A0A078DWY1	66	0.415245	0.830927
GO:0044723	single-organism carbohydrate metabolic process	18	A0A078J089, M4EHZ1, R0IG50, A0A078HHR9, V4LKQ8, A0A078DNP2, A0A078HL16, A0A087GS72, A0A087HK48, D7KLH0, A0A075M3M5, A0A087H5C5, R0EVU0, W8Q789, A0A178VQH8, F4JHS0, R0HVT6, V4LAE1	339	0.416177	0.831916
GO:0009064	glutamine family amino acid metabolic process	5	O24335, A0A0D3C4T3, A0A178WJZ1, Q9ZNZ7, A0A087GZ16	86	0.424073	0.836652
GO:0004722	protein serine/threonine phosphatase activity	2	R0HGQ5, O64730	29	0.42521	0.836652
GO:0045934	negative regulation of nucleobase-containing compound metabolic process	2	M4CP65, A0A178VMR4	29	0.42521	0.836652
GO:0040029	regulation of gene expression, epigenetic	2	A0A178VMR4, A9Q115	29	0.42521	0.836652
GO:1901698	response to nitrogen compound	2	V4L1B6, A0A178URS6	29	0.42521	0.836652
GO:0071478	cellular response to radiation	2	O64730, A9Q115	29	0.42521	0.836652
GO:0071482	cellular response to light stimulus	2	O64730, A9Q115	29	0.42521	0.836652
GO:0090696	post-embryonic plant organ development	2	R0FDJ8, A0A178WJZ1	29	0.42521	0.836652
GO:0072330	monocarboxylic acid biosynthetic process	7	A0A078F758, R0IJD7, A0A078DXE8, D7MNW6, V4KUK0, G4WXD8, D7KLH0	125	0.42633	0.836652
GO:0005991	trehalose metabolic process	1	W8Q789	11	0.428658	0.836652
GO:0051094	positive regulation of developmental process	1	D7KLH0	11	0.428658	0.836652
GO:0015288	porin activity	1	A0A078HQA4	11	0.428658	0.836652
GO:0030414	peptidase inhibitor activity	1	V4L5K5	11	0.428658	0.836652
GO:0022829	wide pore channel activity	1	A0A078HQA4	11	0.428658	0.836652
GO:0046467	membrane lipid biosynthetic process	1	A0A178UMQ8	11	0.428658	0.836652
GO:0019676	ammonia assimilation cycle	1	Q9ZNZ7	11	0.428658	0.836652
GO:0009739	response to gibberellin	1	A0A087HIQ4	11	0.428658	0.836652
GO:0044454	nuclear chromosome part	1	A0A178VMR4	11	0.428658	0.836652
GO:0004033	aldo-keto reductase (NADP) activity	1	R0IKM7	11	0.428658	0.836652
GO:0045156	electron transporter, transferring electrons within the cyclic electron transport pathway of photosynthesis activity	1	A0A087GEH8	11	0.428658	0.836652
GO:0006664	glycolipid metabolic process	1	A0A178UMQ8	11	0.428658	0.836652
GO:0000103	sulfate assimilation	1	A0A087GFX9	11	0.428658	0.836652
GO:0009099	valine biosynthetic process	1	D7MNW6	11	0.428658	0.836652
GO:1901605	alpha-amino acid metabolic process	16	O24335, D7LKW5, A0A078CGS5, D7LJX7, D7MNW6, A0A178VYZ1, D7MV68, A0A078FM14, A0A087GFX9, A0A0D3C4T3, R0FDJ8, A0A178WJZ1, A0A178WAU5, Q9ZNZ7, A0A078CZL5, A0A087GZ16	303	0.434081	0.846368
GO:0016835	carbon-oxygen lyase activity	7	A0A078EGE6, A0A078CAC6, D7LJX7, A0A087GEG9, D7MV68, A0A0D3CQN5, A0A087H276	126	0.434545	0.846407
GO:0006520	cellular amino acid metabolic process	23	O24335, A0A087GEG9, A0A078CGS5, D7LJX7, D7LKW5, D7MNW6, A0A178VP87, D7MV68, A0A178VYZ1, A0A078FM14, M4DTX0, A0A087H276, A0A078EGE6, A0A087GFX9, A0A0D3C4T3, A0A0D3EAC9, R0FDJ8, A0A178WJZ1, A0A178WAU5, Q9ZNZ7, M4DYT6, A0A078CZL5, A0A087GZ16	442	0.435574	0.847544
GO:0016746	transferase activity, transferring acyl groups	6	A0A078F758, A0A0D3C4T3, V4LD01, V4P9U3, A0A0D2ZXS4, D7KLH0	107	0.439048	0.849346
GO:0005507	copper ion binding	9	O24335, F4HXZ3, A0A178V3V0, A0A178VP87, A0A178WAU5, V4LGL0, A0A087GS72, A0A078DVT2, A9Q115	166	0.440605	0.849346
GO:0071806	protein transmembrane transport	3	A0A078HQA4, A0A078J003, A0A078DVT2	49	0.441122	0.849346
GO:0019757	glycosinolate metabolic process	3	D7LJX7, D7MV68, V4LGL0	49	0.441122	0.849346
GO:0016143	S-glycoside metabolic process	3	D7LJX7, D7MV68, V4LGL0	49	0.441122	0.849346
GO:0019760	glucosinolate metabolic process	3	D7LJX7, D7MV68, V4LGL0	49	0.441122	0.849346
GO:0009890	negative regulation of biosynthetic process	3	M4CP65, A0A178VMR4, A9Q115	49	0.441122	0.849346
GO:0044036	cell wall macromolecule metabolic process	2	R0EVU0, A0A087GEX4	30	0.44242	0.849346
GO:0016866	intramolecular transferase activity	2	D7MV68, A0A0D3BFD9	30	0.44242	0.849346
GO:0009654	photosystem II oxygen evolving complex	2	A0A175DDT6, A0A0D3A7X4	30	0.44242	0.849346
GO:0006633	fatty acid biosynthetic process	5	A0A078F758, A0A078DXE8, V4KUK0, G4WXD8, D7KLH0	88	0.443839	0.849346
GO:0009814	defense response, incompatible interaction	3	A0A087GKB9, A0A0D3D7X1, D7M9X2	50	0.454309	0.849346
GO:0071214	cellular response to abiotic stimulus	3	O64730, B9DGT7, A9Q115	50	0.454309	0.849346
GO:1901072	glucosamine-containing compound catabolic process	1	M4DWQ5	12	0.457031	0.849346
GO:0043022	ribosome binding	1	D7KNV0	12	0.457031	0.849346
GO:0046348	amino sugar catabolic process	1	M4DWQ5	12	0.457031	0.849346
GO:0032592	integral component of mitochondrial membrane	1	A0A078HQA4	12	0.457031	0.849346
GO:0006564	L-serine biosynthetic process	1	A0A078CZL5	12	0.457031	0.849346
GO:0072507	divalent inorganic cation homeostasis	1	A0A178VRQ2	12	0.457031	0.849346
GO:0006783	heme biosynthetic process	1	A0A0D3BFD9	12	0.457031	0.849346
GO:0000228	nuclear chromosome	1	A0A178VMR4	12	0.457031	0.849346
GO:0006022	aminoglycan metabolic process	1	M4DWQ5	12	0.457031	0.849346
GO:0061659	ubiquitin-like protein ligase activity	1	A0A178VMR4	12	0.457031	0.849346
GO:0009501	amyloplast	1	A0A078HL16	12	0.457031	0.849346
GO:0006030	chitin metabolic process	1	M4DWQ5	12	0.457031	0.849346
GO:0016160	amylase activity	1	A0A178V6J6	12	0.457031	0.849346
GO:0019288	isopentenyl diphosphate biosynthetic process, methylerythritol 4-phosphate pathway	1	D7LFE3	12	0.457031	0.849346
GO:0005761	mitochondrial ribosome	1	A0A078DWY1	12	0.457031	0.849346
GO:0012507	ER to Golgi transport vesicle membrane	1	A0A078BVL6	12	0.457031	0.849346
GO:0030684	preribosome	1	V4MXR1	12	0.457031	0.849346
GO:0004373	glycogen (starch) synthase activity	1	A0A078HL16	12	0.457031	0.849346
GO:0002252	immune effector process	1	A0A078JT05	12	0.457031	0.849346
GO:0010411	xyloglucan metabolic process	1	A0A087GEX4	12	0.457031	0.849346
GO:0046930	pore complex	1	A0A078HQA4	12	0.457031	0.849346
GO:0061630	ubiquitin protein ligase activity	1	A0A178VMR4	12	0.457031	0.849346
GO:0009933	meristem structural organization	1	A0A178W7K7	12	0.457031	0.849346
GO:0004602	glutathione peroxidase activity	1	A0A087GRU5	12	0.457031	0.849346
GO:0006032	chitin catabolic process	1	M4DWQ5	12	0.457031	0.849346
GO:0023014	signal transduction by protein phosphorylation	1	V4L1B6	12	0.457031	0.849346
GO:0009508	plastid chromosome	1	V4L0Y4	12	0.457031	0.849346
GO:1901071	glucosamine-containing compound metabolic process	1	M4DWQ5	12	0.457031	0.849346
GO:0030134	ER to Golgi transport vesicle	1	A0A078BVL6	12	0.457031	0.849346
GO:0005744	mitochondrial inner membrane presequence translocase complex	1	A0A078HQA4	12	0.457031	0.849346
GO:0006026	aminoglycan catabolic process	1	M4DWQ5	12	0.457031	0.849346
GO:0061134	peptidase regulator activity	1	V4L5K5	12	0.457031	0.849346
GO:0051538	3 iron, 4 sulfur cluster binding	1	Q9ZNZ7	12	0.457031	0.849346
GO:0005874	microtubule	2	A0A178VTR1, B9DGT7	31	0.459342	0.849492
GO:0046873	metal ion transmembrane transporter activity	2	A0A178VRQ2, A0A178UV43	31	0.459342	0.849492
GO:0090066	regulation of anatomical structure size	2	A0A087GGA8, D7KLH0	31	0.459342	0.849492
GO:0032535	regulation of cellular component size	2	A0A087GGA8, D7KLH0	31	0.459342	0.849492
GO:0009404	toxin metabolic process	2	V4L1B6, R0ETD5	31	0.459342	0.849492
GO:0010605	negative regulation of macromolecule metabolic process	4	V4L5K5, M4CP65, A0A178VMR4, A9Q115	70	0.460046	0.849969
GO:0008610	lipid biosynthetic process	10	A0A178UMQ8, A0A078F758, V4L870, A0A078DXE8, A0A087GN96, V4LP72, V4KUK0, D7KLH0, G4WXD8, D7LFE3	189	0.463067	0.85472
GO:0033218	amide binding	3	D7LZC0, V4KUK0, G4WXD8	51	0.467366	0.858492
GO:0009743	response to carbohydrate	3	A0A078HQA4, Q9ZNZ7, A9Q115	51	0.467366	0.858492
GO:0015036	disulfide oxidoreductase activity	3	A0A078FU68, D7L598, A0A087GPG1	51	0.467366	0.858492
GO:0016860	intramolecular oxidoreductase activity	3	R0IJD7, A0A078FM14, V4LP72	51	0.467366	0.858492
GO:0005982	starch metabolic process	3	A0A178V6J6, A0A078HL16, D7KLH0	51	0.467366	0.858492
GO:0010287	plastoglobule	5	Q8LCQ4, A0A075M3M5, D7LTD9, Q6DBN2, R0IKM7	91	0.473164	0.862407
GO:0006081	cellular aldehyde metabolic process	5	A0A0D3CQN5, A0A087GS72, D7LFE3, D7M346, A0A178VCR4	91	0.473164	0.862407
GO:0016458	gene silencing	2	A0A178VMR4, A9Q115	32	0.475962	0.862407
GO:0072596	establishment of protein localization to chloroplast	2	A0A078HQA4, A0A078J003	32	0.475962	0.862407
GO:0045036	protein targeting to chloroplast	2	A0A078HQA4, A0A078J003	32	0.475962	0.862407
GO:0034470	ncRNA processing	3	D7LTD9, V4MXR1, V4JR39	52	0.480283	0.862407
GO:0046686	response to cadmium ion	15	A0A078J089, A0A178VP87, D7MV68, A0A087GS72, A0A078DVT2, A0A075M3M5, V4MA11, O22809, A0A087H5C5, M4D7S0, A0A087GPG1, R0I5Y8, A0A178VQH8, B9DGT7, V4K9A3	292	0.482241	0.862407
GO:0042254	ribosome biogenesis	5	D7LTD9, Q9FJZ2, V4MXR1, A0A078DWY1, A0A078D332	92	0.482832	0.862407
GO:0006732	coenzyme metabolic process	12	A0A078J089, D7LKW5, D7MNW6, A0A178VYZ1, D7L694, A0A087GS72, A0A087HK48, D7M346, D7KLH0, V4MBI2, V4LAE1, A0A178VCR4	232	0.482905	0.862407
GO:0004568	chitinase activity	1	M4DWQ5	13	0.483999	0.862407
GO:0016157	sucrose synthase activity	1	A0A078DNP2	13	0.483999	0.862407
GO:0000229	cytoplasmic chromosome	1	V4L0Y4	13	0.483999	0.862407
GO:0042168	heme metabolic process	1	A0A0D3BFD9	13	0.483999	0.862407
GO:1903509	liposaccharide metabolic process	1	A0A178UMQ8	13	0.483999	0.862407
GO:0009608	response to symbiont	1	V4LGL0	13	0.483999	0.862407
GO:0010431	seed maturation	1	A0A078I437	13	0.483999	0.862407
GO:0016688	L-ascorbate peroxidase activity	1	A0A0D3AEV6	13	0.483999	0.862407
GO:0070417	cellular response to cold	1	V4LGL0	13	0.483999	0.862407
GO:0009610	response to symbiotic fungus	1	V4LGL0	13	0.483999	0.862407
GO:0005096	GTPase activator activity	1	A0A178VP87	13	0.483999	0.862407
GO:0015085	calcium ion transmembrane transporter activity	1	A0A178VRQ2	13	0.483999	0.862407
GO:0034249	negative regulation of cellular amide metabolic process	1	A9Q115	13	0.483999	0.862407
GO:0046943	carboxylic acid transmembrane transporter activity	1	A0A078HQA4	13	0.483999	0.862407
GO:0004130	cytochrome-c peroxidase activity	1	A0A0D3AEV6	13	0.483999	0.862407
GO:0043255	regulation of carbohydrate biosynthetic process	1	R0HVT6	13	0.483999	0.862407
GO:0000226	microtubule cytoskeleton organization	1	B9DGT7	13	0.483999	0.862407
GO:0009396	folic acid-containing compound biosynthetic process	1	D7MNW6	13	0.483999	0.862407
GO:0071472	cellular response to salt stress	1	A9Q115	13	0.483999	0.862407
GO:0017148	negative regulation of translation	1	A9Q115	13	0.483999	0.862407
GO:0019740	nitrogen utilization	1	Q9ZNZ7	13	0.483999	0.862407
GO:0016730	oxidoreductase activity, acting on iron-sulfur proteins as donors	1	A0A087GEH8	13	0.483999	0.862407
GO:0005342	organic acid transmembrane transporter activity	1	A0A078HQA4	13	0.483999	0.862407
GO:0042742	defense response to bacterium	7	V4LT85, A0A087GEH8, A0A0D3D7X1, A0A078JT05, P00433, E4MXN5, A9Q115	133	0.491433	0.871431
GO:0046496	nicotinamide nucleotide metabolic process	6	A0A078J089, A0A087GS72, A0A087HK48, V4LAE1, D7M346, A0A178VCR4	113	0.491944	0.871431
GO:0019362	pyridine nucleotide metabolic process	6	A0A078J089, A0A087GS72, A0A087HK48, V4LAE1, D7M346, A0A178VCR4	113	0.491944	0.871431
GO:0009267	cellular response to starvation	2	A0A178UMQ8, M4F776	33	0.492269	0.871431
GO:0072598	protein localization to chloroplast	2	A0A078HQA4, A0A078J003	33	0.492269	0.871431
GO:0022838	substrate-specific channel activity	2	A0A078I000, A0A087GGA8	33	0.492269	0.871431
GO:0008047	enzyme activator activity	2	A0A178VP87, R0FCA2	33	0.492269	0.871431
GO:0033692	cellular polysaccharide biosynthetic process	3	A0A078HL16, R0HVT6, D7KLH0	53	0.493052	0.872006
GO:0010629	negative regulation of gene expression	3	M4CP65, A0A178VMR4, A9Q115	54	0.505665	0.88569
GO:0043177	organic acid binding	3	V4KUK0, A0A078CZL5, G4WXD8	54	0.505665	0.88569
GO:0031406	carboxylic acid binding	3	V4KUK0, A0A078CZL5, G4WXD8	54	0.505665	0.88569
GO:0006364	rRNA processing	2	D7LTD9, V4MXR1	34	0.508253	0.88569
GO:0030091	protein repair	2	D7MV45, A0A0D3CQN5	34	0.508253	0.88569
GO:0042445	hormone metabolic process	2	R0FDJ8, A0A178WJZ1	34	0.508253	0.88569
GO:0048580	regulation of post-embryonic development	2	V4L1B6, D7KLH0	34	0.508253	0.88569
GO:0071470	cellular response to osmotic stress	1	A9Q115	14	0.509632	0.88569
GO:0070588	calcium ion transmembrane transport	1	A0A178VRQ2	14	0.509632	0.88569
GO:0048029	monosaccharide binding	1	Q9SIN5	14	0.509632	0.88569
GO:0001666	response to hypoxia	1	A0A178WAU5	14	0.509632	0.88569
GO:0003712	transcription cofactor activity	1	A0A0D3CQN5	14	0.509632	0.88569
GO:0009749	response to glucose	1	A0A078HQA4	14	0.509632	0.88569
GO:0006813	potassium ion transport	1	A0A078DLK4	14	0.509632	0.88569
GO:0035821	modification of morphology or physiology of other organism	1	P00433	14	0.509632	0.88569
GO:0002020	protease binding	1	V4LGL0	14	0.509632	0.88569
GO:1901699	cellular response to nitrogen compound	1	A0A178URS6	14	0.509632	0.88569
GO:0006561	proline biosynthetic process	1	A0A087GZ16	14	0.509632	0.88569
GO:0046890	regulation of lipid biosynthetic process	1	V4L870	14	0.509632	0.88569
GO:0019438	aromatic compound biosynthetic process	23	V4L870, A0A087GEG9, D7LTD9, D7MNW6, A0A178VMR4, A0A078FM14, A0A0D3CQN5, V4JR39, A0A0D3BFD9, D7KLH0, M4CP65, V4MA11, O22809, V4MK94, V4L1B6, R0FDJ8, A0A178WJZ1, F4JHS0, D7LYF5, A0A178W7K7, V4LP72, R0HVT6, V4MBI2	459	0.51122	0.887236
GO:0045087	innate immune response	5	A0A087GKB9, A0A0D3D7X1, A0A078JT05, P00433, D7M9X2	95	0.511455	0.887236
GO:0031324	negative regulation of cellular metabolic process	4	V4L5K5, M4CP65, A0A178VMR4, A9Q115	75	0.514279	0.891323
GO:0022402	cell cycle process	3	M4CP65, R0HVT6, V4MBI2	55	0.518113	0.896336
GO:0009765	photosynthesis, light harvesting	3	Q8LCQ4, A0A175DDT6, V4L870	55	0.518113	0.896336
GO:0006631	fatty acid metabolic process	8	A0A078F758, V4L9M5, D7L9G8, A0A078DXE8, A0A0D3AG00, V4KUK0, G4WXD8, D7KLH0	157	0.52061	0.899006
GO:0051082	unfolded protein binding	5	D7M4F3, Q9SIL3, R0G9G5, E4MXN5, A0A078DVT2	96	0.520854	0.899006
GO:0050662	coenzyme binding	11	V4MA11, V4LNM2, D7LTD9, O22809, R0F4J2, D7L694, V4JR39, V4NYR7, A0A078CZL5, Q8LFU3, A0A078IRE8	218	0.521074	0.899006
GO:0042594	response to starvation	2	A0A178UMQ8, M4F776	35	0.523906	0.899044
GO:0016072	rRNA metabolic process	2	D7LTD9, V4MXR1	35	0.523906	0.899044
GO:0009066	aspartate family amino acid metabolic process	4	A0A078CGS5, D7LKW5, D7MNW6, A0A178VYZ1	76	0.524829	0.899044
GO:0009057	macromolecule catabolic process	12	V4LT85, O22256, A0A178V6J6, A0A087G4X8, A0A078GRZ7, V4LKQ8, V4P9U3, V4JQT7, A0A178URS6, A0A078H9S8, R0EVU0, M4DWQ5	239	0.525293	0.899044
GO:0044459	plasma membrane part	6	A0A078CI95, V4L2R1, A0A087GPI0, A0A178V3V0, A0A087GGA8, A0A078I437	117	0.526298	0.899044
GO:0000271	polysaccharide biosynthetic process	3	A0A078HL16, R0HVT6, D7KLH0	56	0.530392	0.899044
GO:0006721	terpenoid metabolic process	3	V4L870, D7KLH0, D7LFE3	56	0.530392	0.899044
GO:0006560	proline metabolic process	1	A0A087GZ16	15	0.533996	0.899044
GO:0008061	chitin binding	1	M4DWQ5	15	0.533996	0.899044
GO:1903046	meiotic cell cycle process	1	V4MBI2	15	0.533996	0.899044
GO:0006542	glutamine biosynthetic process	1	O24335	15	0.533996	0.899044
GO:0006012	galactose metabolic process	1	A0A078HHR9	15	0.533996	0.899044
GO:0030244	cellulose biosynthetic process	1	R0HVT6	15	0.533996	0.899044
GO:0010374	stomatal complex development	1	V4L1B6	15	0.533996	0.899044
GO:1902680	positive regulation of RNA biosynthetic process	1	D7LTD9	15	0.533996	0.899044
GO:0019202	amino acid kinase activity	1	A0A087GZ16	15	0.533996	0.899044
GO:0009898	cytoplasmic side of plasma membrane	1	A0A078I437	15	0.533996	0.899044
GO:0030145	manganese ion binding	1	A0A087HKF2	15	0.533996	0.899044
GO:0045893	positive regulation of transcription, DNA-templated	1	D7LTD9	15	0.533996	0.899044
GO:0004332	fructose-bisphosphate aldolase activity	1	A0A087GS72	15	0.533996	0.899044
GO:0042537	benzene-containing compound metabolic process	1	D7MNW6	15	0.533996	0.899044
GO:0000315	organellar large ribosomal subunit	1	A0A078DWY1	15	0.533996	0.899044
GO:1903508	positive regulation of nucleic acid-templated transcription	1	D7LTD9	15	0.533996	0.899044
GO:0099516	ion antiporter activity	1	A0A178VRQ2	15	0.533996	0.899044
GO:0042325	regulation of phosphorylation	1	V4L1B6	15	0.533996	0.899044
GO:0004356	glutamate-ammonia ligase activity	1	O24335	15	0.533996	0.899044
GO:0042559	pteridine-containing compound biosynthetic process	1	D7MNW6	15	0.533996	0.899044
GO:0016747	transferase activity, transferring acyl groups other than amino-acyl groups	4	A0A078F758, A0A0D3C4T3, V4LD01, V4P9U3	77	0.535269	0.899044
GO:0005802	trans-Golgi network	4	A0A087GEG9, D7M3J2, V4K8F1, R0HVT6	77	0.535269	0.899044
GO:0017038	protein import	4	A0A078HQA4, D7LZC0, A0A078J003, A0A078DVT2	77	0.535269	0.899044
GO:0099080	supramolecular complex	2	A0A178VTR1, B9DGT7	36	0.539221	0.90124
GO:0099513	polymeric cytoskeletal fiber	2	A0A178VTR1, B9DGT7	36	0.539221	0.90124
GO:0099081	supramolecular polymer	2	A0A178VTR1, B9DGT7	36	0.539221	0.90124
GO:0099512	supramolecular fiber	2	A0A178VTR1, B9DGT7	36	0.539221	0.90124
GO:0071555	cell wall organization	5	V4LT85, O22256, A0A078GRZ7, R0HVT6, A0A087GEX4	98	0.539418	0.90124
GO:0009658	chloroplast organization	5	D7LJX7, D7M8K0, M4E415, A0A078C054, A0A078J003	98	0.539418	0.90124
GO:0006733	oxidoreduction coenzyme metabolic process	6	A0A078J089, A0A087GS72, A0A087HK48, V4LAE1, D7M346, A0A178VCR4	119	0.543124	0.905886
GO:0033554	cellular response to stress	12	A0A0D3CQN5, U5IB74, A9Q115, A0A178URS6, A0A178UMQ8, A0A087GKB9, M4F776, V4L1B6, W8Q789, A0A0D3AEV6, A0A087GPG1, V4LGL0	242	0.543151	0.905886
GO:0034637	cellular carbohydrate biosynthetic process	4	W8Q789, A0A078HL16, R0HVT6, D7KLH0	78	0.545594	0.907867
GO:0009853	photorespiration	4	A0A075M3M5, M4EHZ1, R0IG50, Q9ZNZ7	78	0.545594	0.907867
GO:0072524	pyridine-containing compound metabolic process	6	A0A078J089, A0A087GS72, A0A087HK48, V4LAE1, D7M346, A0A178VCR4	120	0.551439	0.911016
GO:0016209	antioxidant activity	6	A0A087GRU5, A0A0D3AEV6, A0A087GPG1, P00433, U5IB74, A9Q115	120	0.551439	0.911016
GO:0008654	phospholipid biosynthetic process	2	V4LP72, D7LFE3	37	0.554193	0.911016
GO:0009657	plastid organization	7	D7LJX7, D7LTD9, O64730, D7M8K0, M4E415, A0A078C054, A0A078J003	141	0.554193	0.911016
GO:0000988	transcription factor activity, protein binding	1	A0A0D3CQN5	16	0.557152	0.911016
GO:0005048	signal sequence binding	1	D7LZC0	16	0.557152	0.911016
GO:0044183	protein binding involved in protein folding	1	A0A078DVT2	16	0.557152	0.911016
GO:0016861	intramolecular oxidoreductase activity, interconverting aldoses and ketoses	1	A0A078FM14	16	0.557152	0.911016
GO:0006260	DNA replication	1	M4CP65	16	0.557152	0.911016
GO:0048532	anatomical structure arrangement	1	A0A178W7K7	16	0.557152	0.911016
GO:0031348	negative regulation of defense response	1	V4LGL0	16	0.557152	0.911016
GO:0006573	valine metabolic process	1	D7MNW6	16	0.557152	0.911016
GO:0031408	oxylipin biosynthetic process	1	A0A078DXE8	16	0.557152	0.911016
GO:0000989	transcription factor activity, transcription factor binding	1	A0A0D3CQN5	16	0.557152	0.911016
GO:0043067	regulation of programmed cell death	1	A0A087GKB9	16	0.557152	0.911016
GO:0042274	ribosomal small subunit biogenesis	1	Q9FJZ2	16	0.557152	0.911016
GO:0098573	intrinsic component of mitochondrial membrane	1	A0A078HQA4	16	0.557152	0.911016
GO:2000241	regulation of reproductive process	1	D7KLH0	16	0.557152	0.911016
GO:0006955	immune response	5	A0A087GKB9, A0A0D3D7X1, A0A078JT05, P00433, D7M9X2	100	0.557645	0.911016
GO:0031669	cellular response to nutrient levels	2	A0A178UMQ8, M4F776	38	0.568819	0.916163
GO:1901681	sulfur compound binding	2	V4KUK0, G4WXD8	38	0.568819	0.916163
GO:1905392	plant organ morphogenesis	3	D7M3Z4, R0FDJ8, A0A178WJZ1	60	0.577696	0.916163
GO:0009967	positive regulation of signal transduction	1	V4L1B6	17	0.579161	0.916163
GO:0019762	glucosinolate catabolic process	1	V4LGL0	17	0.579161	0.916163
GO:0044438	microbody part	1	D7MIF8	17	0.579161	0.916163
GO:0023056	positive regulation of signaling	1	V4L1B6	17	0.579161	0.916163
GO:0015849	organic acid transport	1	A0A078HQA4	17	0.579161	0.916163
GO:0035670	plant-type ovary development	1	V4L1B6	17	0.579161	0.916163
GO:0031072	heat shock protein binding	1	A0A178W7K7	17	0.579161	0.916163
GO:0048440	carpel development	1	V4L1B6	17	0.579161	0.916163
GO:0008235	metalloexopeptidase activity	1	A0A087HN90	17	0.579161	0.916163
GO:0072509	divalent inorganic cation transmembrane transporter activity	1	A0A178VRQ2	17	0.579161	0.916163
GO:0044439	peroxisomal part	1	D7MIF8	17	0.579161	0.916163
GO:0051321	meiotic cell cycle	1	V4MBI2	17	0.579161	0.916163
GO:0035194	posttranscriptional gene silencing by RNA	1	A9Q115	17	0.579161	0.916163
GO:0098562	cytoplasmic side of membrane	1	A0A078I437	17	0.579161	0.916163
GO:0005615	extracellular space	1	D7M9X2	17	0.579161	0.916163
GO:0019759	glycosinolate catabolic process	1	V4LGL0	17	0.579161	0.916163
GO:0048481	plant ovule development	1	V4L1B6	17	0.579161	0.916163
GO:0047134	protein-disulfide reductase activity	1	A0A087GPG1	17	0.579161	0.916163
GO:0061727	methylglyoxal catabolic process to lactate	1	A0A0D3CQN5	17	0.579161	0.916163
GO:0019243	methylglyoxal catabolic process to D-lactate via S-lactoyl-glutathione	1	A0A0D3CQN5	17	0.579161	0.916163
GO:0046942	carboxylic acid transport	1	A0A078HQA4	17	0.579161	0.916163
GO:0016145	S-glycoside catabolic process	1	V4LGL0	17	0.579161	0.916163
GO:0045935	positive regulation of nucleobase-containing compound metabolic process	1	D7LTD9	17	0.579161	0.916163
GO:0006040	amino sugar metabolic process	1	M4DWQ5	17	0.579161	0.916163
GO:0009768	photosynthesis, light harvesting in photosystem I	1	Q8LCQ4	17	0.579161	0.916163
GO:0010647	positive regulation of cell communication	1	V4L1B6	17	0.579161	0.916163
GO:0051254	positive regulation of RNA metabolic process	1	D7LTD9	17	0.579161	0.916163
GO:0006766	vitamin metabolic process	2	V4L870, V4JR39	39	0.583095	0.920091
GO:0009110	vitamin biosynthetic process	2	V4L870, V4JR39	39	0.583095	0.920091
GO:0004364	glutathione transferase activity	2	A0A078EUF2, R0ETD5	40	0.597021	0.927662
GO:0042546	cell wall biogenesis	2	R0HVT6, A0A087GEX4	40	0.597021	0.927662
GO:0031409	pigment binding	1	Q8LCQ4	18	0.60008	0.927662
GO:0071103	DNA conformation change	1	V4MXR1	18	0.60008	0.927662
GO:0071369	cellular response to ethylene stimulus	1	A0A178URS6	18	0.60008	0.927662
GO:0016880	acid-ammonia (or amide) ligase activity	1	O24335	18	0.60008	0.927662
GO:0080043	quercetin 3-O-glucosyltransferase activity	1	F4JHS0	18	0.60008	0.927662
GO:0046165	alcohol biosynthetic process	1	V4L870	18	0.60008	0.927662
GO:0016569	covalent chromatin modification	1	A0A178VMR4	18	0.60008	0.927662
GO:0006089	lactate metabolic process	1	A0A0D3CQN5	18	0.60008	0.927662
GO:0042126	nitrate metabolic process	1	O24335	18	0.60008	0.927662
GO:0080044	quercetin 7-O-glucosyltransferase activity	1	F4JHS0	18	0.60008	0.927662
GO:0036293	response to decreased oxygen levels	1	A0A178WAU5	18	0.60008	0.927662
GO:0030695	GTPase regulator activity	1	A0A178VP87	18	0.60008	0.927662
GO:0016211	ammonia ligase activity	1	O24335	18	0.60008	0.927662
GO:0046912	transferase activity, transferring acyl groups, acyl groups converted into alkyl on transfer	1	D7KLH0	18	0.60008	0.927662
GO:0016857	racemase and epimerase activity, acting on carbohydrates and derivatives	1	A0A078HHR9	18	0.60008	0.927662
GO:0010941	regulation of cell death	1	A0A087GKB9	18	0.60008	0.927662
GO:0005983	starch catabolic process	1	A0A178V6J6	18	0.60008	0.927662
GO:0042128	nitrate assimilation	1	O24335	18	0.60008	0.927662
GO:0070482	response to oxygen levels	1	A0A178WAU5	18	0.60008	0.927662
GO:0006816	calcium ion transport	1	A0A178VRQ2	18	0.60008	0.927662
GO:0019344	cysteine biosynthetic process	1	A0A087GFX9	19	0.619961	0.929698
GO:0019585	glucuronate metabolic process	1	F4JHS0	19	0.619961	0.929698
GO:0052695	cellular glucuronidation	1	F4JHS0	19	0.619961	0.929698
GO:0003002	regionalization	1	V4L1B6	19	0.619961	0.929698
GO:0051596	methylglyoxal catabolic process	1	A0A0D3CQN5	19	0.619961	0.929698
GO:0016782	transferase activity, transferring sulfur-containing groups	1	A0A0D3CX35	19	0.619961	0.929698
GO:0031399	regulation of protein modification process	1	V4L1B6	19	0.619961	0.929698
GO:0042182	ketone catabolic process	1	A0A0D3CQN5	19	0.619961	0.929698
GO:0019216	regulation of lipid metabolic process	1	V4L870	19	0.619961	0.929698
GO:0052696	flavonoid glucuronidation	1	F4JHS0	19	0.619961	0.929698
GO:0009629	response to gravity	1	B9DGT7	19	0.619961	0.929698
GO:0006458	'de novo' protein folding	1	A0A078DVT2	19	0.619961	0.929698
GO:0009438	methylglyoxal metabolic process	1	A0A0D3CQN5	19	0.619961	0.929698
GO:0006063	uronic acid metabolic process	1	F4JHS0	19	0.619961	0.929698
GO:0031407	oxylipin metabolic process	1	A0A078DXE8	19	0.619961	0.929698
GO:0006536	glutamate metabolic process	1	Q9ZNZ7	19	0.619961	0.929698
GO:0042646	plastid nucleoid	1	V4L0Y4	19	0.619961	0.929698
GO:2001057	reactive nitrogen species metabolic process	1	O24335	19	0.619961	0.929698
GO:0010181	FMN binding	1	A0A078DXE8	20	0.638858	0.939526
GO:0009741	response to brassinosteroid	1	A0A087HIQ4	20	0.638858	0.939526
GO:0006526	arginine biosynthetic process	1	A0A0D3C4T3	20	0.638858	0.939526
GO:0019321	pentose metabolic process	1	V4LKQ8	20	0.638858	0.939526
GO:0008033	tRNA processing	1	V4JR39	20	0.638858	0.939526
GO:1901505	carbohydrate derivative transporter activity	1	R0HHY6	20	0.638858	0.939526
GO:0006109	regulation of carbohydrate metabolic process	1	R0HVT6	20	0.638858	0.939526
GO:0016774	phosphotransferase activity, carboxyl group as acceptor	1	A0A087GZ16	20	0.638858	0.939526
GO:0030095	chloroplast photosystem II	1	A0A078G8S3	20	0.638858	0.939526
GO:0048467	gynoecium development	1	V4L1B6	20	0.638858	0.939526
GO:0019953	sexual reproduction	1	V4MBI2	20	0.638858	0.939526
GO:0051274	beta-glucan biosynthetic process	1	R0HVT6	20	0.638858	0.939526
GO:0006508	proteolysis	18	A0A078K0T5, R0H6Q5, V4P9U3, R0HRD5, R0HB45, A0A078C054, M4EM22, A0A078GNK2, D7LBB4, A0A087HN90, V4L5K5, A0A078G2D0, D6PRM6, A0A078H717, M4E415, A0A0D3BYG4, R0G8R2, E4MY49	365	0.54577	0.907867
GO:0009889	regulation of biosynthetic process	12	V4L870, D7LTD9, A0A178VMR4, A0A0D3CQN5, R0I6C7, A9Q115, M4CP65, V4MK94, R0FDJ8, A0A178WJZ1, A0A178W7K7, R0HVT6	244	0.55493	0.911016
GO:0006629	lipid metabolic process	17	V4L870, D7L9G8, A0A078DXE8, A0A087GN96, V4KUK0, A0A078I437, G4WXD8, D7KLH0, D7LFE3, A0A178UMQ8, A0A078F758, D7KJB1, V4L9M5, A0A0D2ZX28, A0A0D3AG00, V4LP72, V4MBI2	347	0.557716	0.911016
GO:0048037	cofactor binding	18	Q3ZVC8, V4LNM2, D7LTD9, R0F4J2, D7MNW6, A0A078DXE8, A0A178VP87, D7L694, V4JR39, V4NYR7, Q8LFU3, A0A0D3BFD9, V4MA11, O22809, A0A178WAU5, M4DYT6, A0A078CZL5, A0A078IRE8	369	0.565092	0.916163
GO:0045229	external encapsulating structure organization	5	V4LT85, O22256, A0A078GRZ7, R0HVT6, A0A087GEX4	101	0.566624	0.916163
GO:0044724	single-organism carbohydrate catabolic process	5	A0A078J089, R0EVU0, A0A087GS72, A0A087HK48, V4LAE1	101	0.566624	0.916163
GO:0019752	carboxylic acid metabolic process	42	A0A078J089, O24335, A0A087GEG9, A0A078CGS5, D7LKW5, D7L9G8, R0IJD7, A0A087HKF2, A0A078DXE8, A0A178VYZ1, A0A078FM14, D7L694, M4DTX0, V4KUK0, G4WXD8, D7KLH0, D7LFE3, A0A078EGE6, V4L9M5, A0A087GFX9, A0A178WAU5, F4JHS0, Q9ZNZ7, M4DYT6, V4LAE1, D7LJX7, D7MNW6, A0A178VP87, D7MV68, A0A078JT05, A0A0D3CQN5, A0A087GS72, A0A087HK48, A0A087H276, A0A078F758, A0A0D3C4T3, A0A0D3EAC9, R0FDJ8, A0A178WJZ1, A0A0D3A…	860	0.568854	0.916163
GO:0051540	metal cluster binding	5	A0A078EGE6, A0A087GFX9, D7MV68, Q9ZNZ7, A0A087H276	102	0.57551	0.916163
GO:0051536	iron-sulfur cluster binding	5	A0A078EGE6, A0A087GFX9, D7MV68, Q9ZNZ7, A0A087H276	102	0.57551	0.916163
GO:0006757	ATP generation from ADP	4	A0A078J089, A0A087GS72, A0A087HK48, V4LAE1	81	0.575839	0.916163
GO:0006096	glycolytic process	4	A0A078J089, A0A087GS72, A0A087HK48, V4LAE1	81	0.575839	0.916163
GO:0048731	system development	19	A0A087FY81, O24335, V4KQ77, D7LF25, A0A087GKF4, A0A087HKF2, Q9SIN5, D7M3Z4, A0A078FPP2, A0A078I437, D7KLH0, V4L1B6, R0FDJ8, R0EVU0, A0A178WJZ1, D7LZC0, A0A178W7K7, R0FGI7, A0A087GZ16	393	0.581376	0.918902
GO:0043436	oxoacid metabolic process	44	A0A078J089, O24335, A0A078CGS5, A0A087GEG9, D7LKW5, D7L9G8, R0IJD7, A0A087HKF2, A0A078DXE8, A0A178VYZ1, D7L694, A0A078FM14, M4DTX0, V4KUK0, D7LFE3, G4WXD8, D7KLH0, A0A178UMQ8, A0A078EGE6, V4L9M5, A0A087GFX9, A0A178WAU5, F4JHS0, M4DYT6, Q9ZNZ7, V4LAE1, D7LJX7, D7MNW6, A0A178VP87, D7MV68, A0A078JT05, A0A0D3CQN5, A0A087GS72, A0A087HK48, A0A087H276, A0A078F758, A0A0D3C4T3, A0A0D3EAC9, R0FDJ8, A0A178W…	906	0.585748	0.923511
GO:0006082	organic acid metabolic process	44	A0A078J089, O24335, A0A078CGS5, A0A087GEG9, D7LKW5, D7L9G8, R0IJD7, A0A087HKF2, A0A078DXE8, A0A178VYZ1, D7L694, A0A078FM14, M4DTX0, V4KUK0, D7LFE3, G4WXD8, D7KLH0, A0A178UMQ8, A0A078EGE6, V4L9M5, A0A087GFX9, A0A178WAU5, F4JHS0, M4DYT6, Q9ZNZ7, V4LAE1, D7LJX7, D7MNW6, A0A178VP87, D7MV68, A0A078JT05, A0A0D3CQN5, A0A087GS72, A0A087HK48, A0A087H276, A0A078F758, A0A0D3C4T3, A0A0D3EAC9, R0FDJ8, A0A178W…	908	0.592085	0.927662
GO:0006355	regulation of transcription, DNA-templated	6	M4CP65, D7LTD9, V4MK94, A0A178VMR4, A0A0D3CQN5, A0A178W7K7	126	0.599811	0.927662
GO:0008236	serine-type peptidase activity	4	V4P9U3, R0HB45, R0G8R2, M4EM22	84	0.604918	0.929698
GO:0017171	serine hydrolase activity	4	V4P9U3, R0HB45, R0G8R2, M4EM22	84	0.604918	0.929698
GO:0006165	nucleoside diphosphate phosphorylation	4	A0A078J089, A0A087GS72, A0A087HK48, V4LAE1	84	0.604918	0.929698
GO:1902582	single-organism intracellular transport	4	A0A078HQA4, D7LZC0, A0A078J003, A0A078DVT2	84	0.604918	0.929698
GO:1902580	single-organism cellular localization	4	A0A078HQA4, D7LZC0, A0A078J003, A0A078DVT2	84	0.604918	0.929698
GO:0031326	regulation of cellular biosynthetic process	11	M4CP65, V4L870, D7LTD9, V4MK94, R0FDJ8, A0A178VMR4, A0A178WJZ1, A0A0D3CQN5, R0I6C7, A0A178W7K7, A9Q115	232	0.605867	0.929698
GO:0071554	cell wall organization or biogenesis	6	V4LT85, O22256, A0A078GRZ7, R0EVU0, R0HVT6, A0A087GEX4	127	0.607599	0.929698
GO:0008233	peptidase activity	14	A0A078K0T5, R0H6Q5, V4P9U3, R0HB45, A0A0D3E0J8, M4EM22, A0A078GNK2, D7LBB4, A0A087HN90, A0A078G2D0, D6PRM6, A0A078H717, R0G8R2, E4MY49	295	0.608009	0.929698
GO:0032268	regulation of cellular protein metabolic process	5	V4L5K5, D7LTD9, V4L1B6, R0I6C7, A9Q115	106	0.610072	0.929698
GO:0009070	serine family amino acid biosynthetic process	2	A0A087GFX9, A0A078CZL5	41	0.610596	0.929698
GO:0005984	disaccharide metabolic process	2	W8Q789, A0A078DNP2	41	0.610596	0.929698
GO:0050793	regulation of developmental process	3	A0A087HKF2, V4L1B6, D7KLH0	63	0.611154	0.929698
GO:0009555	pollen development	3	V4L1B6, V4MBI2, A0A087GZ16	63	0.611154	0.929698
GO:0009185	ribonucleoside diphosphate metabolic process	4	A0A078J089, A0A087GS72, A0A087HK48, V4LAE1	85	0.614339	0.929698
GO:0009135	purine nucleoside diphosphate metabolic process	4	A0A078J089, A0A087GS72, A0A087HK48, V4LAE1	85	0.614339	0.929698
GO:0072593	reactive oxygen species metabolic process	4	A0A0D3AEV6, P00433, U5IB74, A9Q115	85	0.614339	0.929698
GO:0018193	peptidyl-amino acid modification	4	R0GFS8, R0FCA2, A0A178UA59, V4NDH1	85	0.614339	0.929698
GO:0009179	purine ribonucleoside diphosphate metabolic process	4	A0A078J089, A0A087GS72, A0A087HK48, V4LAE1	85	0.614339	0.929698
GO:0046031	ADP metabolic process	4	A0A078J089, A0A087GS72, A0A087HK48, V4LAE1	85	0.614339	0.929698
GO:1901362	organic cyclic compound biosynthetic process	24	A0A087GEG9, D7LTD9, A0A178VMR4, A0A078FM14, V4JR39, A0A0D3BFD9, D7KLH0, M4CP65, V4MA11, V4MK94, F4JHS0, D7LYF5, A0A178W7K7, V4L870, D7MNW6, A0A0D3CQN5, O22809, V4L1B6, R0FDJ8, A0A178WJZ1, V4LP72, R0HVT6, V4MBI2, A0A087GZ16	505	0.61918	0.929698
GO:0004721	phosphoprotein phosphatase activity	2	R0HGQ5, O64730	42	0.62382	0.933278
GO:0009522	photosystem I	2	Q8LCQ4, A0A087GI99	42	0.62382	0.933278
GO:0031667	response to nutrient levels	2	A0A178UMQ8, M4F776	42	0.62382	0.933278
GO:0030170	pyridoxal phosphate binding	5	D7MNW6, A0A178VP87, A0A178WAU5, M4DYT6, A0A0D3BFD9	108	0.626732	0.936162
GO:0002376	immune system process	5	A0A087GKB9, A0A0D3D7X1, A0A078JT05, P00433, D7M9X2	108	0.626732	0.936162
GO:2001141	regulation of RNA biosynthetic process	6	M4CP65, D7LTD9, V4MK94, A0A178VMR4, A0A0D3CQN5, A0A178W7K7	130	0.630459	0.939526
GO:1903506	regulation of nucleic acid-templated transcription	6	M4CP65, D7LTD9, V4MK94, A0A178VMR4, A0A0D3CQN5, A0A178W7K7	130	0.630459	0.939526
GO:0022622	root system development	4	A0A087HKF2, D7M3Z4, R0FDJ8, A0A178WJZ1	87	0.63276	0.939526
GO:0048364	root development	4	A0A087HKF2, D7M3Z4, R0FDJ8, A0A178WJZ1	87	0.63276	0.939526
GO:0016788	hydrolase activity, acting on ester bonds	13	V4LT85, O22256, A0A078GRZ7, O64730, D7M346, D7KQK4, R0HGQ5, D7KJB1, A0A087H5E9, A0A087G8N1, W8Q789, D7LQI9, A0A178VCR4	279	0.633563	0.939526
GO:0051246	regulation of protein metabolic process	5	V4L5K5, D7LTD9, V4L1B6, R0I6C7, A9Q115	109	0.634901	0.939526
GO:0042744	hydrogen peroxide catabolic process	2	A0A0D3AEV6, P00433	43	0.636695	0.939526
GO:0015291	secondary active transmembrane transporter activity	2	A0A078DLK4, A0A178VRQ2	43	0.636695	0.939526
GO:0043648	dicarboxylic acid metabolic process	4	A0A087GEG9, A0A087HKF2, D7MNW6, Q9ZNZ7	88	0.641756	0.94088
GO:0048229	gametophyte development	4	D7LJX7, V4L1B6, V4MBI2, A0A087GZ16	88	0.641756	0.94088
GO:0098791	Golgi subcompartment	4	A0A087GEG9, D7M3J2, V4K8F1, R0HVT6	88	0.641756	0.94088
GO:0009132	nucleoside diphosphate metabolic process	4	A0A078J089, A0A087GS72, A0A087HK48, V4LAE1	88	0.641756	0.94088
GO:0008238	exopeptidase activity	3	A0A087HN90, V4P9U3, M4EM22	66	0.642798	0.941638
GO:0005783	endoplasmic reticulum	15	A0A078I000, A0A0D3B7Y7, V4KQ28, A0A078D332, A0A078I437, A0A078CTT3, Q9LQ26, A0A178UV43, R0IP21, D7KIH9, M4F776, A0A087HBX3, V4KKY6, V4LGL0, V4MBI2	323	0.643263	0.941638
GO:1901701	cellular response to oxygen-containing compound	6	V4L1B6, A0A078JT05, A0A0D3CQN5, U5IB74, A9Q115, A0A178URS6	132	0.645263	0.94384
GO:0006555	methionine metabolic process	2	D7LKW5, A0A178VYZ1	44	0.649223	0.948174
GO:0009767	photosynthetic electron transport chain	2	A0A087GEH8, A0A175DDT6	44	0.649223	0.948174
GO:0031047	gene silencing by RNA	1	A9Q115	21	0.656817	0.951235
GO:0015144	carbohydrate transmembrane transporter activity	1	A0A087GGA8	21	0.656817	0.951235
GO:0046185	aldehyde catabolic process	1	A0A0D3CQN5	21	0.656817	0.951235
GO:0042026	protein refolding	1	A0A078DVT2	21	0.656817	0.951235
GO:0048038	quinone binding	1	Q3ZVC8	21	0.656817	0.951235
GO:0051259	protein oligomerization	1	A0A087GPG1	21	0.656817	0.951235
GO:0098656	anion transmembrane transport	1	A0A078HQA4	21	0.656817	0.951235
GO:0000313	organellar ribosome	1	A0A078DWY1	21	0.656817	0.951235
GO:0071322	cellular response to carbohydrate stimulus	1	A9Q115	21	0.656817	0.951235
GO:0006643	membrane lipid metabolic process	1	A0A178UMQ8	21	0.656817	0.951235
GO:0006357	regulation of transcription from RNA polymerase II promoter	1	A0A0D3CQN5	21	0.656817	0.951235
GO:0044255	cellular lipid metabolic process	13	V4L870, D7L9G8, A0A078DXE8, A0A087GN96, V4KUK0, G4WXD8, D7KLH0, D7LFE3, A0A178UMQ8, A0A078F758, V4L9M5, A0A0D3AG00, V4LP72	284	0.659044	0.953734
GO:1901136	carbohydrate derivative catabolic process	2	V4LGL0, M4DWQ5	45	0.661406	0.955699
GO:0004871	signal transducer activity	2	V4L1B6, V4NCN6	45	0.661406	0.955699
GO:0005694	chromosome	2	A0A178VMR4, V4L0Y4	46	0.673248	0.962045
GO:0009311	oligosaccharide metabolic process	2	W8Q789, A0A078DNP2	46	0.673248	0.962045
GO:0046914	transition metal ion binding	24	A0A175DDT6, O24335, D7LF25, A0A087HKF2, A0A0D3C6F4, A0A178VMR4, A0A078GK07, A0A078FPP2, A0A078DVT2, A9Q115, V4L9M5, Q9FK90, A0A178WAU5, A0A078BVL6, R0FGI7, A0A087FY81, V4KQ77, F4HXZ3, A0A178VP87, A0A087GS72, R0G495, A0A178V3V0, V4LGL0, R0HVT6	519	0.673291	0.962045
GO:0051252	regulation of RNA metabolic process	6	M4CP65, D7LTD9, V4MK94, A0A178VMR4, A0A0D3CQN5, A0A178W7K7	136	0.673783	0.962045
GO:0006351	transcription, DNA-templated	6	M4CP65, D7LTD9, V4MK94, A0A178VMR4, A0A0D3CQN5, A0A178W7K7	136	0.673783	0.962045
GO:0034284	response to monosaccharide	1	A0A078HQA4	22	0.673886	0.962045
GO:0019203	carbohydrate phosphatase activity	1	W8Q789	22	0.673886	0.962045
GO:0003993	acid phosphatase activity	1	R0HGQ5	22	0.673886	0.962045
GO:0009746	response to hexose	1	A0A078HQA4	22	0.673886	0.962045
GO:0042398	cellular modified amino acid biosynthetic process	1	D7MNW6	22	0.673886	0.962045
GO:1901476	carbohydrate transporter activity	1	A0A087GGA8	22	0.673886	0.962045
GO:0010043	response to zinc ion	1	R0FGI7	22	0.673886	0.962045
GO:0070838	divalent metal ion transport	1	A0A178VRQ2	22	0.673886	0.962045
GO:0072511	divalent inorganic cation transport	1	A0A178VRQ2	22	0.673886	0.962045
GO:0004791	thioredoxin-disulfide reductase activity	1	A0A087GPG1	22	0.673886	0.962045
GO:0016441	posttranscriptional gene silencing	1	A9Q115	22	0.673886	0.962045
GO:0046939	nucleotide phosphorylation	4	A0A078J089, A0A087GS72, A0A087HK48, V4LAE1	92	0.676283	0.96402
GO:0009892	negative regulation of metabolic process	4	V4L5K5, M4CP65, A0A178VMR4, A9Q115	92	0.676283	0.96402
GO:0016740	transferase activity	44	A0A087H0S8, V4P9U3, A0A178VMR4, A0A078DNP2, A0A078HL16, R0ETD5, M4DTX0, A0A0D2ZXS4, V4LGD7, V4MRK7, A0A078F7S0, A0A0D3BFD9, D7KLH0, D7LFE3, A0A087H5W2, A0A178UMQ8, V4LD01, V4K8F1, A0A087H5C5, M4D7S0, A0A178WAU5, A0A0D3B5A4, F4JHS0, R0I0Q4, M4DYT6, A0A087GEX4, D7MH74, A0A087GJJ7, D7MNW6, A0A087GN96, A0A178VP87, A0A078DDG3, E4MW50, A0A0D3CX35, A0A078F758, A0A0D3C4T3, V4L1B6, W8Q789, A0A078EUF2, V4N…	937	0.679706	0.968174
GO:0000096	sulfur amino acid metabolic process	3	A0A087GFX9, D7LKW5, A0A178VYZ1	70	0.682107	0.970867
GO:1901617	organic hydroxy compound biosynthetic process	2	V4L870, V4JR39	47	0.684753	0.973177
GO:0044877	macromolecular complex binding	2	D7KNV0, Q9FJZ2	47	0.684753	0.973177
GO:0009832	plant-type cell wall biogenesis	1	R0HVT6	23	0.690109	0.977141
GO:0048507	meristem development	1	A0A178W7K7	23	0.690109	0.977141
GO:0007389	pattern specification process	1	V4L1B6	23	0.690109	0.977141
GO:0030658	transport vesicle membrane	1	A0A078BVL6	23	0.690109	0.977141
GO:0006366	transcription from RNA polymerase II promoter	1	A0A0D3CQN5	23	0.690109	0.977141
GO:0070887	cellular response to chemical stimulus	10	V4L1B6, A0A0D3AEV6, A0A087GPG1, A0A078JT05, A0A0D3CQN5, F4JHS0, U5IB74, A9Q115, A0A178URS6, A0A178UV43	226	0.691186	0.977539
GO:0046700	heterocycle catabolic process	3	A0A087GKB9, A0A087G4X8, V4LGL0	71	0.691417	0.977539
GO:0006575	cellular modified amino acid metabolic process	4	D7LKW5, D7MNW6, A0A178VYZ1, R0ETD5	94	0.692659	0.978568
GO:1901565	organonitrogen compound catabolic process	6	A0A087GKB9, A0A087G4X8, A0A078CGS5, A0A178WAU5, V4LGL0, M4DWQ5	139	0.69419	0.980003
GO:0031323	regulation of cellular metabolic process	14	V4L870, D7LTD9, A0A178VMR4, A0A0D3CQN5, R0I6C7, A9Q115, V4L5K5, M4CP65, V4MK94, V4L1B6, R0FDJ8, A0A178WJZ1, Q9ZNZ7, A0A178W7K7	313	0.695683	0.980269
GO:0006730	one-carbon metabolic process	2	D7LKW5, A0A178VYZ1	48	0.695924	0.980269
GO:0004252	serine-type endopeptidase activity	2	R0HB45, R0G8R2	48	0.695924	0.980269
GO:0004601	peroxidase activity	3	A0A087GRU5, A0A0D3AEV6, P00433	72	0.700522	0.982882
GO:0097659	nucleic acid-templated transcription	6	M4CP65, D7LTD9, V4MK94, A0A178VMR4, A0A0D3CQN5, A0A178W7K7	140	0.700803	0.982882
GO:0009056	catabolic process	29	A0A078J089, O22256, A0A178V6J6, A0A087G4X8, A0A078CGS5, V4P9U3, V4JQT7, R0ETD5, A0A087H5E9, A0A078H9S8, A0A087G8N1, A0A0D3AEV6, A0A178WAU5, F4JHS0, V4LAE1, V4LT85, A0A078GRZ7, V4LKQ8, A0A0D3CQN5, A0A087GS72, A0A087HK48, A0A178URS6, A0A087GKB9, D7KJB1, R0EVU0, P00433, M4DWQ5, V4LGL0, D7LQI9	632	0.701812	0.982882
GO:0046351	disaccharide biosynthetic process	1	W8Q789	24	0.705527	0.982882
GO:0007623	circadian rhythm	1	V4L0Y4	24	0.705527	0.982882
GO:0005985	sucrose metabolic process	1	A0A078DNP2	24	0.705527	0.982882
GO:0016109	tetraterpenoid biosynthetic process	1	D7KLH0	24	0.705527	0.982882
GO:0090305	nucleic acid phosphodiester bond hydrolysis	1	D7KQK4	24	0.705527	0.982882
GO:0016117	carotenoid biosynthetic process	1	D7KLH0	24	0.705527	0.982882
GO:0048438	floral whorl development	1	V4L1B6	24	0.705527	0.982882
GO:0000785	chromatin	1	A0A178VMR4	24	0.705527	0.982882
GO:0005200	structural constituent of cytoskeleton	1	B9DGT7	24	0.705527	0.982882
GO:0006553	lysine metabolic process	1	A0A078CGS5	24	0.705527	0.982882
GO:0048585	negative regulation of response to stimulus	1	V4LGL0	24	0.705527	0.982882
GO:0030004	cellular monovalent inorganic cation homeostasis	1	A0A078I437	24	0.705527	0.982882
GO:0015630	microtubule cytoskeleton	2	A0A178VTR1, B9DGT7	49	0.706766	0.983889
GO:0032774	RNA biosynthetic process	6	M4CP65, D7LTD9, V4MK94, A0A178VMR4, A0A0D3CQN5, A0A178W7K7	142	0.713738	0.987394
GO:0042743	hydrogen peroxide metabolic process	2	A0A0D3AEV6, P00433	50	0.717286	0.987394
GO:0044270	cellular nitrogen compound catabolic process	3	A0A087GKB9, A0A087G4X8, V4LGL0	74	0.718117	0.987394
GO:0031967	organelle envelope	36	A0A087GRU5, D7LTD9, D7LF25, R0F4J2, Q9SIN5, A0A078FPP2, D7L694, V4JR39, R0I6C7, A0A078J003, A0A078I437, V4KUK0, A0A078GNK2, G4WXD8, A0A178UMQ8, A0A087H5C5, D7LYF5, Q9ZNZ7, V4LAE1, A0A087FY81, A0A087GEH8, R0IG50, F4HXZ3, A0A078DWY1, A0A087GS72, A0A087HK48, Q8LCQ4, A0A075M3M5, A0A087GKB9, D7M8K0, A0A078HQA4, A4QJL4, D7LZC0, A0A178VQH8, V4L0Y4, R0IKM7	784	0.718275	0.987394
GO:0031975	envelope	36	A0A087GRU5, D7LTD9, D7LF25, R0F4J2, Q9SIN5, A0A078FPP2, D7L694, V4JR39, R0I6C7, A0A078J003, A0A078I437, V4KUK0, A0A078GNK2, G4WXD8, A0A178UMQ8, A0A087H5C5, D7LYF5, Q9ZNZ7, V4LAE1, A0A087FY81, A0A087GEH8, R0IG50, F4HXZ3, A0A078DWY1, A0A087GS72, A0A087HK48, Q8LCQ4, A0A075M3M5, A0A087GKB9, D7M8K0, A0A078HQA4, A4QJL4, D7LZC0, A0A178VQH8, V4L0Y4, R0IKM7	784	0.718275	0.987394
GO:0048608	reproductive structure development	12	A0A087FY81, D7LF25, A0A087GKF4, A0A078FPP2, A0A078I437, D7KLH0, V4L1B6, R0EVU0, D7LZC0, A0A178W7K7, A0A087GZ16, R0FGI7	275	0.719129	0.987394
GO:0061458	reproductive system development	12	A0A087FY81, D7LF25, A0A087GKF4, A0A078FPP2, A0A078I437, D7KLH0, V4L1B6, R0EVU0, D7LZC0, A0A178W7K7, A0A087GZ16, R0FGI7	275	0.719129	0.987394
GO:0019219	regulation of nucleobase-containing compound metabolic process	6	M4CP65, D7LTD9, V4MK94, A0A178VMR4, A0A0D3CQN5, A0A178W7K7	143	0.720061	0.987394
GO:0006525	arginine metabolic process	1	A0A0D3C4T3	25	0.72018	0.987394
GO:0051336	regulation of hydrolase activity	1	V4L5K5	25	0.72018	0.987394
GO:0009295	nucleoid	1	V4L0Y4	25	0.72018	0.987394
GO:0031301	integral component of organelle membrane	1	A0A078HQA4	25	0.72018	0.987394
GO:0009312	oligosaccharide biosynthetic process	1	W8Q789	25	0.72018	0.987394
GO:0010256	endomembrane system organization	1	A0A087HBX3	25	0.72018	0.987394
GO:0015711	organic anion transport	1	A0A078HQA4	25	0.72018	0.987394
GO:0051174	regulation of phosphorus metabolic process	1	V4L1B6	25	0.72018	0.987394
GO:0046835	carbohydrate phosphorylation	1	V4MRK7	25	0.72018	0.987394
GO:0048511	rhythmic process	1	V4L0Y4	25	0.72018	0.987394
GO:0044403	symbiosis, encompassing mutualism through parasitism	1	P00433	25	0.72018	0.987394
GO:0019220	regulation of phosphate metabolic process	1	V4L1B6	25	0.72018	0.987394
GO:0048609	multicellular organismal reproductive process	1	A0A078I437	25	0.72018	0.987394
GO:0080090	regulation of primary metabolic process	12	V4L870, D7LTD9, A0A178VMR4, A0A0D3CQN5, R0I6C7, A9Q115, V4L5K5, M4CP65, V4MK94, V4L1B6, A0A178W7K7, R0HVT6	276	0.723733	0.989379
GO:0031974	membrane-enclosed lumen	14	A0A078J089, A0A178VP87, V4MXR1, A0A178VMR4, D7L694, A0A078DWY1, A0A078D332, A0A087GS72, A0A078DVT2, D7MIF8, D7LZC0, Q9ZNZ7, V4LGL0, B9DGT7	320	0.726468	0.989379
GO:0043233	organelle lumen	14	A0A078J089, A0A178VP87, V4MXR1, A0A178VMR4, D7L694, A0A078DWY1, A0A078D332, A0A087GS72, A0A078DVT2, D7MIF8, D7LZC0, Q9ZNZ7, V4LGL0, B9DGT7	320	0.726468	0.989379
GO:0070013	intracellular organelle lumen	14	A0A078J089, A0A178VP87, V4MXR1, A0A178VMR4, D7L694, A0A078DWY1, A0A078D332, A0A087GS72, A0A078DVT2, D7MIF8, D7LZC0, Q9ZNZ7, V4LGL0, B9DGT7	320	0.726468	0.989379
GO:0008168	methyltransferase activity	3	V4K8F1, V4LGD7, A0A078F7S0	75	0.72661	0.989379
GO:0007049	cell cycle	3	M4CP65, R0HVT6, V4MBI2	75	0.72661	0.989379
GO:0019439	aromatic compound catabolic process	3	A0A087GKB9, A0A087G4X8, V4LGL0	75	0.72661	0.989379
GO:0031668	cellular response to extracellular stimulus	2	A0A178UMQ8, M4F776	51	0.727486	0.989379
GO:0071496	cellular response to external stimulus	2	A0A178UMQ8, M4F776	51	0.727486	0.989379
GO:0009639	response to red or far red light	2	Q8LCQ4, R0IG50	51	0.727486	0.989379
GO:0006396	RNA processing	6	M4CP65, A0A087GU96, R0HNM9, D7LTD9, V4MXR1, V4JR39	145	0.732416	0.989379
GO:0009707	chloroplast outer membrane	1	A0A078HQA4	26	0.734106	0.989379
GO:0009626	plant-type hypersensitive response	1	A0A087GKB9	26	0.734106	0.989379
GO:0008137	NADH dehydrogenase (ubiquinone) activity	1	Q3ZVC8	26	0.734106	0.989379
GO:0008514	organic anion transmembrane transporter activity	1	A0A078HQA4	26	0.734106	0.989379
GO:0044427	chromosomal part	1	A0A178VMR4	26	0.734106	0.989379
GO:0030133	transport vesicle	1	A0A078BVL6	26	0.734106	0.989379
GO:0009527	plastid outer membrane	1	A0A078HQA4	26	0.734106	0.989379
GO:0044419	interspecies interaction between organisms	1	P00433	26	0.734106	0.989379
GO:0000281	mitotic cytokinesis	1	R0HVT6	26	0.734106	0.989379
GO:0048437	floral organ development	1	V4L1B6	26	0.734106	0.989379
GO:0061640	cytoskeleton-dependent cytokinesis	1	R0HVT6	26	0.734106	0.989379
GO:0055067	monovalent inorganic cation homeostasis	1	A0A078I437	26	0.734106	0.989379
GO:0060589	nucleoside-triphosphatase regulator activity	1	A0A178VP87	26	0.734106	0.989379
GO:0019222	regulation of metabolic process	15	V4L870, D7LTD9, A0A178VMR4, A0A0D3CQN5, R0I6C7, A9Q115, V4L5K5, M4CP65, V4MK94, V4L1B6, R0FDJ8, A0A178WJZ1, Q9ZNZ7, A0A178W7K7, R0HVT6	344	0.736255	0.991573
GO:0007005	mitochondrion organization	2	A0A078HQA4, A0A078DVT2	52	0.737374	0.992379
GO:0071229	cellular response to acid chemical	3	V4L1B6, A0A078JT05, A9Q115	77	0.742996	0.998532
GO:0016684	oxidoreductase activity, acting on peroxide as acceptor	3	A0A087GRU5, A0A0D3AEV6, P00433	77	0.742996	0.998532
GO:0090487	secondary metabolite catabolic process	1	R0ETD5	27	0.747341	0.998729
GO:0061077	chaperone-mediated protein folding	1	A0A078DVT2	27	0.747341	0.998729
GO:0016036	cellular response to phosphate starvation	1	A0A178UMQ8	27	0.747341	0.998729
GO:0016854	racemase and epimerase activity	1	A0A078HHR9	27	0.747341	0.998729
GO:0016832	aldehyde-lyase activity	1	A0A087GS72	27	0.747341	0.998729
GO:0009407	toxin catabolic process	1	R0ETD5	27	0.747341	0.998729
GO:0015450	P-P-bond-hydrolysis-driven protein transmembrane transporter activity	1	A0A078HQA4	27	0.747341	0.998729
GO:0032504	multicellular organism reproduction	1	A0A078I437	27	0.747341	0.998729
GO:0032259	methylation	3	V4K8F1, V4LGD7, A0A078F7S0	78	0.750892	0.999995
GO:0016879	ligase activity, forming carbon-nitrogen bonds	3	O24335, A0A178VHR6, A0A078JT05	78	0.750892	0.999995
GO:0006397	mRNA processing	3	M4CP65, A0A087GU96, R0HNM9	78	0.750892	0.999995
GO:0006812	cation transport	7	A0A087FY81, A0A078DLK4, V4KQ77, D7LF25, A0A078FPP2, A0A178VRQ2, R0FGI7	171	0.751707	0.999995
GO:0044702	single organism reproductive process	13	A0A087FY81, D7LF25, A0A087GKF4, A0A078FPP2, A0A078I437, D7KLH0, V4L1B6, R0EVU0, D7LZC0, A0A178W7K7, V4MBI2, A0A087GZ16, R0FGI7	305	0.75477	0.999995
GO:0006417	regulation of translation	3	D7LTD9, R0I6C7, A9Q115	79	0.758593	0.999995
GO:0034248	regulation of cellular amide metabolic process	3	D7LTD9, R0I6C7, A9Q115	79	0.758593	0.999995
GO:0030246	carbohydrate binding	4	A0A078GWC7, A0A078HHR9, A0A078H9S8, Q9SIN5	103	0.759011	0.999995
GO:0043094	cellular metabolic compound salvage	4	A0A075M3M5, M4EHZ1, R0IG50, Q9ZNZ7	103	0.759011	0.999995
GO:0016831	carboxy-lyase activity	4	A0A075M3M5, M4EHZ1, R0IG50, A0A087HKF2	103	0.759011	0.999995
GO:0050136	NADH dehydrogenase (quinone) activity	1	Q3ZVC8	28	0.759919	0.999995
GO:0034050	host programmed cell death induced by symbiont	1	A0A087GKB9	28	0.759919	0.999995
GO:1901658	glycosyl compound catabolic process	1	V4LGL0	28	0.759919	0.999995
GO:0016638	oxidoreductase activity, acting on the CH-NH2 group of donors	1	Q9ZNZ7	28	0.759919	0.999995
GO:0004177	aminopeptidase activity	1	A0A087HN90	28	0.759919	0.999995
GO:0010817	regulation of hormone levels	2	R0FDJ8, A0A178WJZ1	55	0.765222	0.999995
GO:0009991	response to extracellular stimulus	2	A0A178UMQ8, M4F776	55	0.765222	0.999995
GO:0051171	regulation of nitrogen compound metabolic process	9	M4CP65, V4L870, D7LTD9, V4MK94, A0A178VMR4, A0A0D3CQN5, R0I6C7, A0A178W7K7, A9Q115	220	0.7709	0.999995
GO:0008320	protein transmembrane transporter activity	1	A0A078HQA4	29	0.771873	0.999995
GO:0006869	lipid transport	1	D7LBB4	29	0.771873	0.999995
GO:1902593	single-organism nuclear import	1	D7LZC0	29	0.771873	0.999995
GO:0044744	protein targeting to nucleus	1	D7LZC0	29	0.771873	0.999995
GO:0019787	ubiquitin-like protein transferase activity	1	A0A178VMR4	29	0.771873	0.999995
GO:0051170	nuclear import	1	D7LZC0	29	0.771873	0.999995
GO:0004842	ubiquitin-protein transferase activity	1	A0A178VMR4	29	0.771873	0.999995
GO:0006606	protein import into nucleus	1	D7LZC0	29	0.771873	0.999995
GO:0033043	regulation of organelle organization	1	A0A178VMR4	29	0.771873	0.999995
GO:0031300	intrinsic component of organelle membrane	1	A0A078HQA4	29	0.771873	0.999995
GO:0022884	macromolecule transmembrane transporter activity	1	A0A078HQA4	29	0.771873	0.999995
GO:0000910	cytokinesis	1	R0HVT6	29	0.771873	0.999995
GO:0043623	cellular protein complex assembly	4	R0GFS8, D7LZC0, A0A078DVT2, V4NDH1	105	0.77215	0.999995
GO:1901361	organic cyclic compound catabolic process	3	A0A087GKB9, A0A087G4X8, V4LGL0	81	0.773419	0.999995
GO:0022618	ribonucleoprotein complex assembly	2	Q9FJZ2, A0A078DWY1	56	0.773919	0.999995
GO:0051276	chromosome organization	2	A0A178VMR4, V4MXR1	56	0.773919	0.999995
GO:0044430	cytoskeletal part	2	A0A178VTR1, B9DGT7	56	0.773919	0.999995
GO:0071941	nitrogen cycle metabolic process	1	O24335	30	0.783234	0.999995
GO:0003700	transcription factor activity, sequence-specific DNA binding	1	M4CP65	30	0.783234	0.999995
GO:0034504	protein localization to nucleus	1	D7LZC0	30	0.783234	0.999995
GO:0005768	endosome	4	A0A087GEG9, D7M3J2, V4K8F1, R0HVT6	107	0.784721	0.999995
GO:0016787	hydrolase activity	55	A0A078IJ26, Q93ZN4, O22256, A0A178V6J6, D7KNV0, O64730, V4P9U3, A0A078C054, A0A0D3E0J8, R0I6C7, M4EM22, D7KQK4, A0A087H5E9, A0A087G8N1, Q9FJZ2, M4E415, A0A087GEX4, A0A078G2Y1, A0A0D3AEY2, R0H6Q5, V4LKQ8, R0I5H3, R0HHY6, R0HB45, D7LBB4, M4F776, R0EVU0, A0A0D3DPA9, M4DWQ5, V4LP72, B9DGT7, A0A078K0T5, V4JQT7, A0A078DGF1, A0A078GNK2, D7M346, R0HGQ5, A0A078G2D0, D6PRM6, A0A078H9S8, A0A178VCR4, V4LT85,…	1209	0.786295	0.999995
GO:0008565	protein transporter activity	3	A0A078HQA4, D7LZC0, A0A078CTT3	83	0.787494	0.999995
GO:0071826	ribonucleoprotein complex subunit organization	2	Q9FJZ2, A0A078DWY1	58	0.790475	0.999995
GO:0003006	developmental process involved in reproduction	13	A0A087FY81, D7LF25, A0A087GKF4, A0A078FPP2, A0A078I437, D7KLH0, V4L1B6, R0EVU0, D7LZC0, A0A178W7K7, V4MBI2, A0A087GZ16, R0FGI7	315	0.793454	0.999995
GO:0016567	protein ubiquitination	1	A0A178VMR4	31	0.79403	0.999995
GO:0006888	ER to Golgi vesicle-mediated transport	1	A0A078BVL6	31	0.79403	0.999995
GO:0016116	carotenoid metabolic process	1	D7KLH0	31	0.79403	0.999995
GO:0016108	tetraterpenoid metabolic process	1	D7KLH0	31	0.79403	0.999995
GO:0007017	microtubule-based process	1	B9DGT7	31	0.79403	0.999995
GO:0010876	lipid localization	1	D7LBB4	31	0.79403	0.999995
GO:0001071	nucleic acid binding transcription factor activity	1	M4CP65	31	0.79403	0.999995
GO:1902578	single-organism localization	15	A0A087FY81, D7LF25, A0A078I000, R0HHY6, A0A078FPP2, A0A078J003, A0A078DVT2, A0A178UV43, D7LBB4, A0A078DLK4, D7M8K0, A0A078HQA4, D7LZC0, A0A087GGA8, R0FGI7	360	0.795786	0.999995
GO:0022613	ribonucleoprotein complex biogenesis	5	D7LTD9, Q9FJZ2, V4MXR1, A0A078DWY1, A0A078D332	133	0.796557	0.999995
GO:2000112	regulation of cellular macromolecule biosynthetic process	8	M4CP65, D7LTD9, V4MK94, A0A178VMR4, A0A0D3CQN5, R0I6C7, A0A178W7K7, A9Q115	203	0.796619	0.999995
GO:0048523	negative regulation of cellular process	4	V4L5K5, M4CP65, A0A178VMR4, A9Q115	109	0.796737	0.999995
GO:0072594	establishment of protein localization to organelle	4	A0A078HQA4, D7LZC0, A0A078J003, A0A078DVT2	109	0.796737	0.999995
GO:0006461	protein complex assembly	5	R0GFS8, A0A087GPG1, D7LZC0, A0A078DVT2, V4NDH1	134	0.801861	0.999995
GO:0004175	endopeptidase activity	6	A0A078K0T5, A0A078G2D0, D6PRM6, R0HB45, R0G8R2, E4MY49	158	0.803342	0.999995
GO:0098807	chloroplast thylakoid membrane protein complex	1	A0A078G8S3	32	0.80429	0.999995
GO:0009225	nucleotide-sugar metabolic process	1	A0A078CAC6	32	0.80429	0.999995
GO:0006534	cysteine metabolic process	1	A0A087GFX9	32	0.80429	0.999995
GO:0006644	phospholipid metabolic process	2	V4LP72, D7LFE3	60	0.805954	0.999995
GO:0070011	peptidase activity, acting on L-amino acid peptides	11	A0A087HN90, A0A078K0T5, A0A078G2D0, D6PRM6, A0A078H717, V4P9U3, R0HB45, R0G8R2, M4EM22, A0A078GNK2, E4MY49	275	0.811215	0.999995
GO:0006811	ion transport	9	A0A087FY81, A0A078DLK4, V4KQ77, D7LF25, A0A078HQA4, A0A078FPP2, A0A178VRQ2, A0A087GGA8, R0FGI7	230	0.813443	0.999995
GO:0009668	plastid membrane organization	1	O64730	33	0.814041	0.999995
GO:0010027	thylakoid membrane organization	1	O64730	33	0.814041	0.999995
GO:0005788	endoplasmic reticulum lumen	1	V4LGL0	33	0.814041	0.999995
GO:0019200	carbohydrate kinase activity	1	V4MRK7	33	0.814041	0.999995
GO:0003954	NADH dehydrogenase activity	1	Q3ZVC8	33	0.814041	0.999995
GO:0044273	sulfur compound catabolic process	1	V4LGL0	33	0.814041	0.999995
GO:0010646	regulation of cell communication	1	V4L1B6	33	0.814041	0.999995
GO:0023051	regulation of signaling	1	V4L1B6	33	0.814041	0.999995
GO:0009966	regulation of signal transduction	1	V4L1B6	33	0.814041	0.999995
GO:0042773	ATP synthesis coupled electron transport	1	Q3ZVC8	33	0.814041	0.999995
GO:0010556	regulation of macromolecule biosynthetic process	8	M4CP65, D7LTD9, V4MK94, A0A178VMR4, A0A0D3CQN5, R0I6C7, A0A178W7K7, A9Q115	208	0.817786	0.999995
GO:0009063	cellular amino acid catabolic process	2	A0A078CGS5, A0A178WAU5	62	0.820411	0.999995
GO:0006259	DNA metabolic process	2	M4CP65, A0A178VMR4	62	0.820411	0.999995
GO:0022625	cytosolic large ribosomal subunit	2	A0A078DWY1, A0A078D332	62	0.820411	0.999995
GO:1901606	alpha-amino acid catabolic process	2	A0A078CGS5, A0A178WAU5	62	0.820411	0.999995
GO:0016614	oxidoreductase activity, acting on CH-OH group of donors	6	A0A087G4X8, V4LNM2, V4NYR7, R0IKM7, A0A078CZL5, A0A078IRE8	162	0.821983	0.999995
GO:0070271	protein complex biogenesis	5	R0GFS8, A0A087GPG1, D7LZC0, A0A078DVT2, V4NDH1	138	0.821996	0.999995
GO:0071669	plant-type cell wall organization or biogenesis	1	R0HVT6	34	0.823307	0.999995
GO:0006119	oxidative phosphorylation	1	Q3ZVC8	34	0.823307	0.999995
GO:0060255	regulation of macromolecule metabolic process	10	V4L5K5, M4CP65, D7LTD9, V4MK94, V4L1B6, A0A178VMR4, A0A0D3CQN5, R0I6C7, A0A178W7K7, A9Q115	256	0.824925	0.999995
GO:0065007	biological regulation	43	O22256, D7LTD9, D7LF25, A0A087HKF2, R0F4J2, D7L598, A0A178VMR4, A0A078FPP2, D7L694, R0I6C7, A0A078I437, D7KLH0, A9Q115, V4L5K5, M4CP65, A0A178VY01, A0A087GFX9, V4MK94, A0A087GPG1, Q9ZNZ7, A0A178W7K7, A0A087GGA8, R0FCA2, R0FGI7, A0A087FY81, V4LT85, V4L870, A0A078GRZ7, V4KQ77, A0A078JT05, A0A0D3CQN5, A0A178VRQ2, A0A178UV43, A0A087GKB9, A0A0D3BRZ5, A0A078FU68, V4L1B6, R0FDJ8, V4NCN6, A0A178WJZ1, P00…	976	0.826409	0.999995
GO:0006325	chromatin organization	1	A0A178VMR4	35	0.832113	0.999995
GO:0032446	protein modification by small protein conjugation	1	A0A178VMR4	35	0.832113	0.999995
GO:0009813	flavonoid biosynthetic process	1	F4JHS0	35	0.832113	0.999995
GO:0007275	multicellular organism development	22	A0A087FY81, O24335, V4KQ77, D7LF25, D7LJX7, A0A087GKF4, A0A087HKF2, Q9SIN5, D7M3Z4, A0A078FPP2, A0A078I437, D7KLH0, A0A078F758, V4L1B6, R0EVU0, R0FDJ8, D7LZC0, A0A178WJZ1, A0A178W7K7, V4MBI2, A0A087GZ16, R0FGI7	528	0.835943	0.999995
GO:0008152	metabolic process	184	A0A078J089, A0A078CGS5, D7LF25, A0A087GEG9, V4P9U3, D7L598, A0A078C054, V4NYR7, V4LGD7, V4KUK0, A0A078I437, M4DTX0, A9Q115, A0A078F7S0, A0A078EGE6, D7KQK4, V4KJE9, A0A087H5E9, A0A078G0J6, V4MK94, A0A087G8N1, A0A087GEX4, R0FCA2, R0FGI7, R0INE7, A0A0D3AEY2, A0A087GEH8, V4L870, R0H6Q5, V4KKH0, D7MNW6, A0A087GN96, D7MV68, U5IB74, D7LBB4, A0A087H276, Q8LCQ4, R0GFS8, V4L1B6, R0FDJ8, A4QJL4, V4LP72, V4M…	3872	0.837876	0.999995
GO:0009791	post-embryonic development	14	A0A087FY81, D7LF25, A0A087GKF4, A0A078FPP2, A0A078I437, D7KLH0, V4L1B6, R0FDJ8, R0EVU0, A0A178WJZ1, D7LZC0, A0A178W7K7, R0FGI7, A0A087GZ16	351	0.838176	0.999995
GO:0006605	protein targeting	4	A0A078HQA4, D7LZC0, A0A078J003, A0A078DVT2	117	0.839494	0.999995
GO:0003677	DNA binding	5	D7KQK4, M4CP65, A0A178VP87, R0HVT6, A0A078J7C1	142	0.840455	0.999995
GO:0006563	L-serine metabolic process	1	A0A078CZL5	36	0.840482	0.999995
GO:0006470	protein dephosphorylation	1	O64730	36	0.840482	0.999995
GO:0009738	abscisic acid-activated signaling pathway	1	V4L1B6	36	0.840482	0.999995
GO:0010016	shoot system morphogenesis	1	A0A178W7K7	36	0.840482	0.999995
GO:0010468	regulation of gene expression	8	M4CP65, D7LTD9, V4MK94, A0A178VMR4, A0A0D3CQN5, R0I6C7, A0A178W7K7, A9Q115	215	0.844537	0.999995
GO:0044703	multi-organism reproductive process	2	V4L1B6, V4MBI2	66	0.846463	0.999995
GO:0018130	heterocycle biosynthetic process	18	V4L870, D7LTD9, D7MNW6, A0A178VMR4, A0A078FM14, A0A0D3CQN5, V4JR39, A0A0D3BFD9, D7KLH0, M4CP65, V4MK94, V4L1B6, R0FDJ8, A0A178WJZ1, D7LYF5, A0A178W7K7, V4LP72, A0A087GZ16	444	0.847261	0.999995
GO:0016791	phosphatase activity	3	R0HGQ5, O64730, W8Q789	93	0.847384	0.999995
GO:0016741	transferase activity, transferring one-carbon groups	3	V4K8F1, V4LGD7, A0A078F7S0	93	0.847384	0.999995
GO:0016597	amino acid binding	1	A0A078CZL5	37	0.848434	0.999995
GO:0008234	cysteine-type peptidase activity	1	A0A078H717	37	0.848434	0.999995
GO:0021700	developmental maturation	1	A0A078I437	37	0.848434	0.999995
GO:0010608	posttranscriptional regulation of gene expression	3	D7LTD9, R0I6C7, A9Q115	94	0.852485	0.999995
GO:0033365	protein localization to organelle	4	A0A078HQA4, D7LZC0, A0A078J003, A0A078DVT2	120	0.853467	0.999995
GO:0022414	reproductive process	13	A0A087FY81, D7LF25, A0A087GKF4, A0A078FPP2, A0A078I437, D7KLH0, V4L1B6, R0EVU0, D7LZC0, A0A178W7K7, V4MBI2, R0FGI7, A0A087GZ16	334	0.854604	0.999995
GO:0009812	flavonoid metabolic process	1	F4JHS0	38	0.855991	0.999995
GO:0004518	nuclease activity	1	D7KQK4	38	0.855991	0.999995
GO:0005516	calmodulin binding	1	R0HHY6	38	0.855991	0.999995
GO:0065003	macromolecular complex assembly	7	R0GFS8, Q9FJZ2, A0A087GPG1, D7LZC0, A0A078DWY1, A0A078DVT2, V4NDH1	196	0.861512	0.999995
GO:0034622	cellular macromolecular complex assembly	6	R0GFS8, Q9FJZ2, D7LZC0, A0A078DWY1, A0A078DVT2, V4NDH1	172	0.862495	0.999995
GO:0000003	reproduction	13	A0A087FY81, D7LF25, A0A087GKF4, A0A078FPP2, A0A078I437, D7KLH0, V4L1B6, R0EVU0, D7LZC0, A0A178W7K7, V4MBI2, R0FGI7, A0A087GZ16	337	0.86284	0.999995
GO:0019395	fatty acid oxidation	1	V4L9M5	39	0.863173	0.999995
GO:0022900	electron transport chain	3	A0A087GEH8, A0A175DDT6, Q3ZVC8	97	0.866907	0.999995
GO:0016071	mRNA metabolic process	3	M4CP65, A0A087GU96, R0HNM9	97	0.866907	0.999995
GO:0005887	integral component of plasma membrane	1	A0A087GGA8	40	0.869997	0.999995
GO:0006066	alcohol metabolic process	1	V4L870	40	0.869997	0.999995
GO:0016168	chlorophyll binding	1	Q8LCQ4	40	0.869997	0.999995
GO:0031981	nuclear lumen	7	V4MXR1, A0A178VMR4, D7LZC0, D7L694, A0A078D332, A0A087GS72, B9DGT7	200	0.874754	0.999995
GO:0006996	organelle organization	15	D7LJX7, D7LTD9, O64730, V4MXR1, A0A178VMR4, A0A078C054, A0A078DWY1, A0A078J003, A0A078DVT2, D7M8K0, A0A078HQA4, M4E415, Q9FJZ2, V4LGL0, B9DGT7	388	0.875937	0.999995
GO:0018298	protein-chromophore linkage	1	Q8LCQ4	41	0.876482	0.999995
GO:0003746	translation elongation factor activity	1	A0A087G6I6	41	0.876482	0.999995
GO:1903047	mitotic cell cycle process	1	R0HVT6	41	0.876482	0.999995
GO:0044707	single-multicellular organism process	22	A0A087FY81, O24335, V4KQ77, D7LF25, D7LJX7, A0A087GKF4, A0A087HKF2, Q9SIN5, D7M3Z4, A0A078FPP2, A0A078I437, D7KLH0, A0A078F758, V4L1B6, R0EVU0, R0FDJ8, D7LZC0, A0A178WJZ1, A0A178W7K7, V4MBI2, A0A087GZ16, R0FGI7	547	0.878429	0.999995
GO:0048519	negative regulation of biological process	5	V4L5K5, M4CP65, A0A178VMR4, V4LGL0, A9Q115	152	0.879813	0.999995
GO:0016655	oxidoreductase activity, acting on NAD(P)H, quinone or similar compound as acceptor	1	Q3ZVC8	42	0.882645	0.999995
GO:0030120	vesicle coat	1	A0A078BVL6	42	0.882645	0.999995
GO:0008237	metallopeptidase activity	2	A0A087HN90, A0A078GNK2	73	0.883934	0.999995
GO:0051704	multi-organism process	3	V4L1B6, P00433, V4MBI2	101	0.884202	0.999995
GO:0000278	mitotic cell cycle	1	R0HVT6	43	0.888501	0.999995
GO:0080167	response to karrikin	1	D7M3Z4	43	0.888501	0.999995
GO:0034440	lipid oxidation	1	V4L9M5	43	0.888501	0.999995
GO:0055085	transmembrane transport	10	A0A078DLK4, V4L870, D7M8K0, A0A078HQA4, R0HHY6, A0A078J003, A0A078DGF1, A0A178VRQ2, A0A087GGA8, A0A078DVT2	277	0.888733	0.999995
GO:1901575	organic substance catabolic process	22	A0A078J089, V4LT85, O22256, A0A178V6J6, A0A087G4X8, A0A078CGS5, A0A078GRZ7, V4LKQ8, V4P9U3, V4JQT7, A0A0D3CQN5, A0A087GS72, A0A087HK48, A0A178URS6, A0A087GKB9, D7KJB1, A0A078H9S8, R0EVU0, A0A178WAU5, M4DWQ5, V4LGL0, V4LAE1	554	0.89175	0.999995
GO:0005730	nucleolus	5	V4MXR1, D7L694, A0A078D332, A0A087GS72, B9DGT7	156	0.893076	0.999995
GO:0022857	transmembrane transporter activity	10	A0A078DLK4, V4L870, A0A078I000, D7M8K0, R0HHY6, A0A078HQA4, A0A078DGF1, A0A087GGA8, A0A178VRQ2, A0A178UV43	279	0.89367	0.999995
GO:0005635	nuclear envelope	1	D7LZC0	44	0.894065	0.999995
GO:0048868	pollen tube development	1	V4L1B6	44	0.894065	0.999995
GO:0097306	cellular response to alcohol	1	V4L1B6	44	0.894065	0.999995
GO:0071215	cellular response to abscisic acid stimulus	1	V4L1B6	44	0.894065	0.999995
GO:0034660	ncRNA metabolic process	4	D7LTD9, A0A0D3EAC9, V4MXR1, V4JR39	131	0.8962	0.999995
GO:0016616	oxidoreductase activity, acting on the CH-OH group of donors, NAD or NADP as acceptor	4	A0A087G4X8, V4LNM2, R0IKM7, A0A078CZL5	131	0.8962	0.999995
GO:0044712	single-organism catabolic process	13	A0A078J089, A0A087G4X8, A0A078CGS5, A0A0D3CQN5, R0ETD5, A0A087GS72, A0A087HK48, A0A087GKB9, D7KJB1, R0EVU0, A0A178WAU5, V4LGL0, V4LAE1	351	0.896556	0.999995
GO:0000398	mRNA splicing, via spliceosome	1	M4CP65	45	0.899353	0.999995
GO:0031224	intrinsic component of membrane	47	A0A175DDT6, A0A087GPI0, A0A078HHR9, V4KN29, V4JQT7, A0A078DGF1, A0A078GNK2, A0A178UMQ8, Q9FMV3, D7KQK4, V4L9M5, D7M3J2, V4K8F1, A0A0D2ZX28, A0A087GI99, A0A078G1F7, R0GW95, Q9ZNZ7, A0A087GGA8, A0A087GEX4, A0A078CI95, V4LT85, Q3ZVC8, V4L2R1, V4LLI0, A0A078I000, R0HHY6, O65513, A0A178W0Q2, V4MKD3, A0A178VRQ2, A0A078CTT3, A0A178UV43, Q8LCQ4, A0A078DLK4, A0A087GSJ9, D7KJB1, R0G495, M4F776, D7M8K0, A0A…	1107	0.900549	0.999995
GO:0005739	mitochondrion	35	A0A078J089, D7LF25, D7L9G8, R0F4J2, A0A078FPP2, D7L694, R0G9G5, A0A078HNN8, A0A078I437, A0A078DVT2, A0A078GNK2, Q8LFU3, D7M3J2, A0A087GPG1, A0A178WAU5, D7LYF5, Q9ZNZ7, V4LAE1, R0FGI7, A0A087FY81, D7LJX7, A0A178VP87, A0A078DWY1, A0A0D3CQN5, A0A087GS72, A0A087HK48, A0A178VXY5, A0A087HN90, A0A087GKB9, D7M7I2, D7M8K0, A0A078HQA4, W8Q789, A0A178WJZ1, A0A087GZ16	848	0.902025	0.999995
GO:0012501	programmed cell death	1	A0A087GKB9	46	0.904377	0.999995
GO:0008509	anion transmembrane transporter activity	1	A0A078HQA4	46	0.904377	0.999995
GO:0022904	respiratory electron transport chain	1	Q3ZVC8	46	0.904377	0.999995
GO:1901615	organic hydroxy compound metabolic process	3	V4L870, A0A0D3CQN5, V4JR39	107	0.906404	0.999995
GO:0009653	anatomical structure morphogenesis	5	D7M3Z4, R0FDJ8, P00433, A0A178WJZ1, A0A178W7K7	161	0.90787	0.999995
GO:0009069	serine family amino acid metabolic process	2	A0A087GFX9, A0A078CZL5	79	0.909133	0.999995
GO:0019898	extrinsic component of membrane	1	A0A0D3A7X4	47	0.909152	0.999995
GO:0000377	RNA splicing, via transesterification reactions with bulged adenosine as nucleophile	1	M4CP65	47	0.909152	0.999995
GO:0000375	RNA splicing, via transesterification reactions	1	M4CP65	47	0.909152	0.999995
GO:0016765	transferase activity, transferring alkyl or aryl (other than methyl) groups	2	A0A078EUF2, R0ETD5	80	0.9128	0.999995
GO:0071822	protein complex subunit organization	5	R0GFS8, A0A087GPG1, D7LZC0, A0A078DVT2, V4NDH1	163	0.91327	0.999995
GO:0006749	glutathione metabolic process	1	R0ETD5	48	0.913689	0.999995
GO:0042277	peptide binding	1	D7LZC0	48	0.913689	0.999995
GO:0010008	endosome membrane	1	D7M3J2	48	0.913689	0.999995
GO:0005774	vacuolar membrane	13	R0HHY6, A0A078D332, A0A178VRQ2, A0A087GS72, A0A078I437, D7M9X2, A0A078DVT2, R0I486, D7M3J2, A0A087HBX3, P00433, B9DGT7, A0A178VCR4	360	0.914438	0.999995
GO:0022626	cytosolic ribosome	5	A0A075M3M5, O24335, A0A078DWY1, A0A078D332, A0A078DVT2	164	0.915864	0.999995
GO:0005996	monosaccharide metabolic process	3	A0A078HHR9, V4LKQ8, F4JHS0	110	0.915999	0.999995
GO:0000139	Golgi membrane	2	D7M3J2, V4K8F1	81	0.916329	0.999995
GO:0008289	lipid binding	2	Q9SIN5, D7LBB4	81	0.916329	0.999995
GO:0014070	response to organic cyclic compound	1	A0A087HIQ4	49	0.918	0.999995
GO:0044437	vacuolar part	13	R0HHY6, A0A078D332, A0A178VRQ2, A0A087GS72, A0A078I437, D7M9X2, A0A078DVT2, R0I486, D7M3J2, A0A087HBX3, P00433, B9DGT7, A0A178VCR4	362	0.918044	0.999995
GO:0071944	cell periphery	52	O22256, A0A087H0S8, A0A087GPI0, R0G9G5, A0A0D2ZXS4, A0A078I437, D7M3J2, R0GW95, R0I5Y8, E4MXN5, A0A087GEX4, A0A078CI95, V4LKQ8, R0I5H3, D7M3Z4, R0HB45, A0A087HIQ4, A0A087GS72, A0A078CTT3, M4F776, A0A178V3V0, R0EVU0, M4DWQ5, R0HVT6, B9DGT7, V4K9A3, O24335, R0IJD7, A0A087HKF2, A0A178UMQ8, V4L5K5, E4MYB4, A0A178VY01, A0A078G2D0, A0A087GPG1, R0I0Q4, A0A087GGA8, V4LT85, V4L2R1, A0A078GRZ7, V4MKD3, D7M…	1230	0.918762	0.999995
GO:0032870	cellular response to hormone stimulus	3	V4L1B6, A0A078JT05, A0A178URS6	111	0.918993	0.999995
GO:0032501	multicellular organismal process	22	A0A087FY81, O24335, V4KQ77, D7LF25, D7LJX7, A0A087GKF4, A0A087HKF2, Q9SIN5, D7M3Z4, A0A078FPP2, A0A078I437, D7KLH0, A0A078F758, V4L1B6, R0EVU0, R0FDJ8, D7LZC0, A0A178WJZ1, A0A178W7K7, V4MBI2, A0A087GZ16, R0FGI7	571	0.919339	0.999995
GO:0005777	peroxisome	4	D7MIF8, A0A078DXE8, V4P9U3, V4LGL0	139	0.920012	0.999995
GO:0042579	microbody	4	D7MIF8, A0A078DXE8, V4P9U3, V4LGL0	139	0.920012	0.999995
GO:0022891	substrate-specific transmembrane transporter activity	8	A0A078DLK4, V4L870, A0A078I000, R0HHY6, A0A078HQA4, A0A087GGA8, A0A178VRQ2, A0A178UV43	243	0.921888	0.999995
GO:0000097	sulfur amino acid biosynthetic process	1	A0A087GFX9	50	0.922096	0.999995
GO:0090558	plant epidermis development	1	V4L1B6	50	0.922096	0.999995
GO:0006820	anion transport	1	A0A078HQA4	50	0.922096	0.999995
GO:0015934	large ribosomal subunit	2	A0A078DWY1, A0A078D332	83	0.922988	0.999995
GO:0051716	cellular response to stimulus	20	O64730, A0A078JT05, A0A0D3CQN5, U5IB74, A9Q115, A0A178URS6, A0A178UV43, A0A178UMQ8, A0A087GKB9, A0A0D3BRZ5, A0A178VY01, M4F776, V4L1B6, W8Q789, V4NCN6, A0A0D3AEV6, A0A087GPG1, F4JHS0, V4LGL0, B9DGT7	529	0.924529	0.999995
GO:0071495	cellular response to endogenous stimulus	3	V4L1B6, A0A078JT05, A0A178URS6	113	0.924692	0.999995
GO:0048316	seed development	6	A0A087GKF4, R0EVU0, D7LZC0, A0A178W7K7, A0A078I437, A0A087GZ16	194	0.925325	0.999995
GO:0030662	coated vesicle membrane	1	A0A078BVL6	51	0.925988	0.999995
GO:0044440	endosomal part	1	D7M3J2	51	0.925988	0.999995
GO:0070647	protein modification by small protein conjugation or removal	1	A0A178VMR4	51	0.925988	0.999995
GO:0016021	integral component of membrane	44	A0A175DDT6, A0A078HHR9, V4KN29, V4JQT7, A0A078DGF1, A0A078GNK2, A0A178UMQ8, Q9FMV3, D7KQK4, V4L9M5, D7M3J2, V4K8F1, A0A0D2ZX28, A0A087GI99, A0A078G1F7, R0GW95, Q9ZNZ7, A0A087GGA8, A0A087GEX4, V4LT85, Q3ZVC8, V4LLI0, A0A078I000, R0HHY6, O65513, A0A178W0Q2, V4MKD3, A0A178VRQ2, A0A078CTT3, A0A178UV43, Q8LCQ4, A0A078DLK4, A0A087GSJ9, D7KJB1, R0G495, M4F776, D7M8K0, A0A078HQA4, A0A087HBX3, A0A178V3V0,…	1064	0.926023	0.999995
GO:0051287	NAD binding	2	V4LNM2, A0A078CZL5	84	0.926128	0.999995
GO:0016887	ATPase activity	7	D7KNV0, M4F776, R0HHY6, M4E415, A0A078C054, A0A078DGF1, R0I6C7	220	0.926195	0.999995
GO:0005215	transporter activity	14	V4L870, A0A078I000, R0HHY6, A0A078DGF1, A0A178VRQ2, A0A078I437, A0A078CTT3, A0A178UV43, A0A078DLK4, D7M8K0, A0A078HQA4, R0GW95, D7LZC0, A0A087GGA8	391	0.926926	0.999995
GO:0097708	intracellular vesicle	5	A0A087GEG9, D7M3J2, V4K8F1, A0A078BVL6, R0HVT6	169	0.92784	0.999995
GO:0031410	cytoplasmic vesicle	5	A0A087GEG9, D7M3J2, V4K8F1, A0A078BVL6, R0HVT6	169	0.92784	0.999995
GO:0009888	tissue development	2	V4L1B6, A0A178W7K7	85	0.929147	0.999995
GO:0012506	vesicle membrane	1	A0A078BVL6	52	0.929686	0.999995
GO:0030659	cytoplasmic vesicle membrane	1	A0A078BVL6	52	0.929686	0.999995
GO:0009856	pollination	1	V4L1B6	52	0.929686	0.999995
GO:0044706	multi-multicellular organism process	1	V4L1B6	52	0.929686	0.999995
GO:0031982	vesicle	5	A0A087GEG9, D7M3J2, V4K8F1, A0A078BVL6, R0HVT6	170	0.930045	0.999995
GO:0006913	nucleocytoplasmic transport	1	D7LZC0	53	0.9332	0.999995
GO:0051169	nuclear transport	1	D7LZC0	53	0.9332	0.999995
GO:0003924	GTPase activity	2	Q9FJZ2, B9DGT7	87	0.934839	0.999995
GO:0044767	single-organism developmental process	23	A0A087FY81, O24335, V4KQ77, D7LF25, D7LJX7, A0A087GKF4, A0A087HKF2, Q9SIN5, D7M3Z4, A0A078FPP2, A0A078I437, D7KLH0, A0A078F758, V4L1B6, R0EVU0, R0FDJ8, D7LZC0, A0A178WJZ1, P00433, A0A178W7K7, V4MBI2, A0A087GZ16, R0FGI7	606	0.935285	0.999995
GO:0048856	anatomical structure development	23	A0A087FY81, O24335, V4KQ77, D7LF25, D7LJX7, A0A087GKF4, A0A087HKF2, Q9SIN5, D7M3Z4, A0A078FPP2, A0A078I437, D7KLH0, A0A078F758, V4L1B6, R0EVU0, R0FDJ8, D7LZC0, A0A178WJZ1, P00433, A0A178W7K7, V4MBI2, A0A087GZ16, R0FGI7	606	0.935285	0.999995
GO:0009790	embryo development	5	A0A087GKF4, D7LZC0, A0A178W7K7, A0A087GZ16, D7KLH0	173	0.936307	0.999995
GO:0007010	cytoskeleton organization	1	B9DGT7	54	0.936539	0.999995
GO:0030258	lipid modification	1	V4L9M5	54	0.936539	0.999995
GO:1901135	carbohydrate derivative metabolic process	16	Q3ZVC8, A0A078J089, D7LJX7, A0A078DDG3, D7MV68, A0A087GS72, A0A087HK48, D7LFE3, D7M346, A0A178URS6, A0A178UMQ8, A0A078CAC6, V4LGL0, M4DWQ5, V4LAE1, A0A178VCR4	446	0.938005	0.999995
GO:0010154	fruit development	6	A0A087GKF4, R0EVU0, D7LZC0, A0A178W7K7, A0A078I437, A0A087GZ16	201	0.939187	0.999995
GO:0048475	coated membrane	1	A0A078BVL6	55	0.939712	0.999995
GO:0051128	regulation of cellular component organization	1	A0A178VMR4	55	0.939712	0.999995
GO:0030117	membrane coat	1	A0A078BVL6	55	0.939712	0.999995
GO:0042803	protein homodimerization activity	1	V4LGL0	55	0.939712	0.999995
GO:0019899	enzyme binding	2	V4L870, V4LGL0	89	0.940098	0.999995
GO:0005856	cytoskeleton	2	A0A178VTR1, B9DGT7	89	0.940098	0.999995
GO:0043933	macromolecular complex subunit organization	7	R0GFS8, Q9FJZ2, A0A087GPG1, D7LZC0, A0A078DWY1, A0A078DVT2, V4NDH1	228	0.940949	0.999995
GO:0016311	dephosphorylation	2	R0HGQ5, O64730	90	0.942574	0.999995
GO:0008219	cell death	1	A0A087GKB9	56	0.942726	0.999995
GO:0042180	cellular ketone metabolic process	1	A0A0D3CQN5	56	0.942726	0.999995
GO:0044431	Golgi apparatus part	4	A0A087GEG9, D7M3J2, V4K8F1, R0HVT6	149	0.942851	0.999995
GO:0071310	cellular response to organic substance	4	V4L1B6, A0A078JT05, A9Q115, A0A178URS6	150	0.944774	0.999995
GO:0051301	cell division	1	R0HVT6	57	0.94559	0.999995
GO:0003743	translation initiation factor activity	1	Q6DT66	57	0.94559	0.999995
GO:0022892	substrate-specific transporter activity	10	A0A078DLK4, V4L870, A0A078I000, R0HHY6, A0A078HQA4, D7LZC0, A0A087GGA8, A0A178VRQ2, A0A078CTT3, A0A178UV43	307	0.945758	0.999995
GO:0016043	cellular component organization	28	O22256, D7LTD9, O64730, A0A178VMR4, A0A078C054, A0A078J003, A0A078DVT2, D7KLH0, M4E415, Q9FJZ2, A0A087GPG1, A0A087GGA8, A0A087GEX4, V4LT85, A0A078GRZ7, D7LJX7, V4MXR1, A0A078DWY1, R0GFS8, D7M8K0, A0A087HBX3, A0A078HQA4, P00433, D7LZC0, V4LGL0, R0HVT6, B9DGT7, V4NDH1	731	0.947116	0.999995
GO:0042802	identical protein binding	2	A0A178VP87, V4LGL0	92	0.947237	0.999995
GO:0042578	phosphoric ester hydrolase activity	3	R0HGQ5, O64730, W8Q789	123	0.948058	0.999995
GO:0009067	aspartate family amino acid biosynthetic process	1	D7MNW6	58	0.948312	0.999995
GO:0006091	generation of precursor metabolites and energy	11	Q8LCQ4, R0GFS8, Q3ZVC8, A0A087GEH8, A0A175DDT6, A0A078J089, V4L870, A0A087GS72, A0A087HK48, V4LAE1, V4NDH1	335	0.949945	0.999995
GO:0009058	biosynthetic process	69	A0A078J089, A0A087GEG9, Q6DT66, A0A078DXE8, A0A078FM14, A0A078HL16, V4JR39, R0I6C7, V4KUK0, Q8LFU3, A9Q115, A0A078EGE6, M4CP65, V4L9M5, V4MA11, A0A078G0J6, V4MK94, A0A178WAU5, V4LAE1, V4L870, V4KKH0, D7MNW6, A0A087GN96, D7MV68, A0A0D3CQN5, A0A078D332, A0A087HK48, A0A087H276, A0A078F758, O22809, V4L1B6, R0FDJ8, A0A178WA54, A0A178VQH8, V4LP72, R0HVT6, V4MBI2, A0A078CZL5, A0A087GZ16, O24335, D7LTD9,…	1632	0.950893	0.999995
GO:0071705	nitrogen compound transport	1	A0A078HQA4	59	0.950897	0.999995
GO:0008380	RNA splicing	1	M4CP65	59	0.950897	0.999995
GO:0051641	cellular localization	11	A0A087FY81, D7LF25, A0A078HQA4, A0A078FPP2, D7LZC0, A0A078BVL6, A0A078J003, A0A078CTT3, A0A078DVT2, R0FGI7, A0A178UV43	336	0.951166	0.999995
GO:0009755	hormone-mediated signaling pathway	2	V4L1B6, A0A078JT05	94	0.951539	0.999995
GO:0046983	protein dimerization activity	2	V4LGL0, A0A078F7S0	94	0.951539	0.999995
GO:0016874	ligase activity	7	O24335, A0A0D3EAC9, D7L9G8, A0A178VHR6, A0A078JT05, V4KUK0, G4WXD8	235	0.951661	0.999995
GO:0034220	ion transmembrane transport	4	A0A078DLK4, A0A078HQA4, A0A178VRQ2, A0A087GGA8	154	0.951889	0.999995
GO:0006725	cellular aromatic compound metabolic process	41	A0A078J089, A0A087G4X8, R0HNM9, D7LTD9, A0A087GEG9, D7LKW5, A0A178VMR4, A0A178VYZ1, A0A078FM14, V4JR39, A0A0D3BFD9, D7KLH0, D7M346, D7KQK4, A0A078CAC6, M4CP65, V4MA11, V4MK94, F4JHS0, D7LYF5, A0A178W7K7, V4LAE1, A0A178VCR4, Q3ZVC8, A0A087GU96, V4L870, D7MNW6, V4MXR1, A0A0D3CQN5, A0A087GS72, A0A087HK48, A0A087GKB9, O22809, A0A0D3EAC9, V4L1B6, R0FDJ8, A0A178WJZ1, V4LP72, V4LGL0, R0HVT6, V4MBI2	1028	0.952497	0.999995
GO:0044085	cellular component biogenesis	12	D7LTD9, V4MXR1, A0A078DWY1, A0A078D332, A0A078DVT2, R0GFS8, Q9FJZ2, A0A087GPG1, D7LZC0, R0HVT6, A0A087GEX4, V4NDH1	362	0.952757	0.999995
GO:0044428	nuclear part	8	R0HNM9, V4MXR1, A0A178VMR4, D7LZC0, D7L694, A0A078D332, A0A087GS72, B9DGT7	262	0.953133	0.999995
GO:0048193	Golgi vesicle transport	1	A0A078BVL6	60	0.953354	0.999995
GO:0022804	active transmembrane transporter activity	5	A0A078DLK4, R0HHY6, A0A078HQA4, A0A078DGF1, A0A178VRQ2	184	0.955196	0.999995
GO:0006399	tRNA metabolic process	2	A0A0D3EAC9, V4JR39	96	0.955506	0.999995
GO:0032502	developmental process	23	A0A087FY81, O24335, V4KQ77, D7LF25, D7LJX7, A0A087GKF4, A0A087HKF2, Q9SIN5, D7M3Z4, A0A078FPP2, A0A078I437, D7KLH0, A0A078F758, V4L1B6, R0EVU0, R0FDJ8, D7LZC0, A0A178WJZ1, P00433, A0A178W7K7, V4MBI2, A0A087GZ16, R0FGI7	628	0.95724	0.999995
GO:0005789	endoplasmic reticulum membrane	2	A0A078CTT3, A0A178UV43	97	0.957371	0.999995
GO:0042175	nuclear outer membrane-endoplasmic reticulum membrane network	2	A0A078CTT3, A0A178UV43	97	0.957371	0.999995
GO:0044699	single-organism process	134	A0A078J089, A0A078CGS5, D7LF25, A0A087GEG9, Q9SIN5, V4P9U3, D7L598, V4NYR7, A0A078J003, V4KUK0, A0A078I437, M4DTX0, A9Q115, A0A078EGE6, V4KJE9, R0FGI7, R0INE7, A0A087GEH8, V4L870, D7MNW6, D7M3Z4, A0A087GN96, D7MV68, U5IB74, D7LBB4, A0A087H276, V4L1B6, D7M8K0, R0FDJ8, V4LP72, V4MBI2, A0A087GZ16, A0A175DDT6, A0A087G4X8, D7LKW5, A0A178VMR4, A0A178VYZ1, A0A078DVT2, D7LFE3, D7M346, G4WXD8, A0A0D3BFD9,…	2995	0.957415	0.999995
GO:0031968	organelle outer membrane	1	A0A078HQA4	62	0.957906	0.999995
GO:0046034	ATP metabolic process	5	Q3ZVC8, A0A078J089, A0A087GS72, A0A087HK48, V4LAE1	186	0.958026	0.999995
GO:0044445	cytosolic part	5	A0A075M3M5, O24335, A0A078DWY1, A0A078D332, A0A078DVT2	186	0.958026	0.999995
GO:0044432	endoplasmic reticulum part	3	V4LGL0, A0A078CTT3, A0A178UV43	129	0.958642	0.999995
GO:0044429	mitochondrial part	8	A0A078J089, D7M8K0, A0A078HQA4, A0A178VP87, A0A078DWY1, Q9ZNZ7, A0A087GS72, A0A078DVT2	267	0.959247	0.999995
GO:0030135	coated vesicle	1	A0A078BVL6	63	0.960013	0.999995
GO:0006413	translational initiation	1	Q6DT66	63	0.960013	0.999995
GO:0044433	cytoplasmic vesicle part	2	D7M3J2, A0A078BVL6	99	0.96088	0.999995
GO:0019867	outer membrane	1	A0A078HQA4	64	0.962015	0.999995
GO:0019318	hexose metabolic process	1	A0A078HHR9	64	0.962015	0.999995
GO:0009826	unidimensional cell growth	1	P00433	64	0.962015	0.999995
GO:0071396	cellular response to lipid	1	V4L1B6	64	0.962015	0.999995
GO:0006414	translational elongation	1	A0A087G6I6	64	0.962015	0.999995
GO:0050789	regulation of biological process	31	D7LTD9, A0A087HKF2, R0F4J2, D7L598, A0A178VMR4, D7L694, R0I6C7, A0A078I437, D7KLH0, A9Q115, V4L5K5, M4CP65, A0A178VY01, A0A087GFX9, V4MK94, A0A087GPG1, Q9ZNZ7, A0A178W7K7, V4L870, A0A078JT05, A0A0D3CQN5, A0A087GKB9, A0A0D3BRZ5, A0A078FU68, V4L1B6, R0FDJ8, V4NCN6, A0A178WJZ1, P00433, V4LGL0, R0HVT6	818	0.962208	0.999995
GO:0008135	translation factor activity, RNA binding	2	A0A087G6I6, Q6DT66	100	0.962529	0.999995
GO:0016773	phosphotransferase activity, alcohol group as acceptor	6	V4L1B6, V4NCN6, A0A078DDG3, R0I0Q4, V4MRK7, D7LFE3	217	0.962648	0.999995
GO:0022890	inorganic cation transmembrane transporter activity	3	A0A078DLK4, A0A178VRQ2, A0A178UV43	132	0.963144	0.999995
GO:0003729	mRNA binding	4	D7LTD9, V4MXR1, A0A078D332, B9DGT7	162	0.963662	0.999995
GO:0009144	purine nucleoside triphosphate metabolic process	5	Q3ZVC8, A0A078J089, A0A087GS72, A0A087HK48, V4LAE1	191	0.964402	0.999995
GO:0009205	purine ribonucleoside triphosphate metabolic process	5	Q3ZVC8, A0A078J089, A0A087GS72, A0A087HK48, V4LAE1	191	0.964402	0.999995
GO:0036211	protein modification process	13	O64730, A0A178VMR4, D7MV45, A0A0D3CQN5, A0A087HN90, Q8LCQ4, R0GFS8, V4L1B6, V4NCN6, R0I0Q4, R0FCA2, A0A178UA59, V4NDH1	399	0.964993	0.999995
GO:0006464	cellular protein modification process	13	O64730, A0A178VMR4, D7MV45, A0A0D3CQN5, A0A087HN90, Q8LCQ4, R0GFS8, V4L1B6, V4NCN6, R0I0Q4, R0FCA2, A0A178UA59, V4NDH1	399	0.964993	0.999995
GO:1901657	glycosyl compound metabolic process	9	Q3ZVC8, A0A078J089, D7LJX7, D7MV68, V4LGL0, A0A087GS72, A0A087HK48, V4LAE1, A0A178URS6	299	0.965658	0.999995
GO:0044281	small molecule metabolic process	51	A0A078J089, A0A078CGS5, A0A087GEG9, A0A078HHR9, A0A078DXE8, A0A078FM14, V4JR39, M4DTX0, V4KUK0, A0A078EGE6, V4L9M5, A0A178WAU5, V4LAE1, Q3ZVC8, V4L870, V4LKQ8, D7MNW6, D7MV68, A0A0D3CQN5, A0A087GS72, A0A087HK48, A0A087H276, A0A078F758, R0FDJ8, A0A0D3AG00, A0A078CZL5, A0A087GZ16, O24335, D7LKW5, D7L9G8, R0IJD7, A0A087HKF2, A0A178VYZ1, D7L694, D7LFE3, D7M346, G4WXD8, D7KLH0, A0A178UMQ8, A0A087GFX9,…	1270	0.966311	0.999995
GO:1901360	organic cyclic compound metabolic process	42	A0A078J089, A0A087G4X8, R0HNM9, D7LTD9, A0A087GEG9, D7LKW5, A0A178VMR4, A0A178VYZ1, A0A078FM14, V4JR39, A0A0D3BFD9, D7KLH0, D7M346, D7KQK4, A0A078CAC6, M4CP65, V4MA11, V4MK94, F4JHS0, D7LYF5, A0A178W7K7, V4LAE1, A0A178VCR4, Q3ZVC8, A0A087GU96, V4L870, D7MNW6, V4MXR1, A0A0D3CQN5, A0A087GS72, A0A087HK48, A0A087GKB9, O22809, A0A0D3EAC9, V4L1B6, R0FDJ8, A0A178WJZ1, V4LP72, V4LGL0, R0HVT6, V4MBI2, A0A…	1072	0.966548	0.999995
GO:0016310	phosphorylation	12	Q3ZVC8, A0A078J089, V4L1B6, V4NCN6, A0A078DDG3, R0I0Q4, A0A087GS72, V4MRK7, A0A087HK48, V4LAE1, A0A087GZ16, D7LFE3	377	0.967361	0.999995
GO:0044238	primary metabolic process	127	A0A078J089, A0A078CGS5, A0A087GEG9, V4P9U3, A0A078C054, V4KUK0, A0A078I437, M4DTX0, A9Q115, A0A078EGE6, D7KQK4, A0A078G0J6, V4MK94, R0FCA2, A0A087GEX4, A0A0D3AEY2, R0H6Q5, V4L870, D7MNW6, A0A087GN96, D7MV68, A0A087H276, D7LBB4, Q8LCQ4, R0GFS8, V4L1B6, R0FDJ8, V4LP72, V4MBI2, A0A087GZ16, A0A078K0T5, A0A087G4X8, D7LKW5, V4JQT7, A0A178VMR4, A0A178VYZ1, A0A078GNK2, D7LFE3, D7M346, G4WXD8, A0A078G2D0,…	2875	0.967917	0.999995
GO:0009793	embryo development ending in seed dormancy	4	A0A087GKF4, D7LZC0, A0A178W7K7, A0A087GZ16	166	0.968491	0.999995
GO:0005911	cell-cell junction	16	O24335, A0A087HKF2, D7M3Z4, A0A078D332, A0A087GS72, A0A078I437, V4MRK7, M4F776, V4NCN6, A0A087GPG1, V4LGL0, A0A087GGA8, R0HVT6, B9DGT7, A0A087GZ16, A0A087HRE3	477	0.968615	0.999995
GO:0030054	cell junction	16	O24335, A0A087HKF2, D7M3Z4, A0A078D332, A0A087GS72, A0A078I437, V4MRK7, M4F776, V4NCN6, A0A087GPG1, V4LGL0, A0A087GGA8, R0HVT6, B9DGT7, A0A087GZ16, A0A087HRE3	477	0.968615	0.999995
GO:0009506	plasmodesma	16	O24335, A0A087HKF2, D7M3Z4, A0A078D332, A0A087GS72, A0A078I437, V4MRK7, M4F776, V4NCN6, A0A087GPG1, V4LGL0, A0A087GGA8, R0HVT6, B9DGT7, A0A087GZ16, A0A087HRE3	477	0.968615	0.999995
GO:0055044	symplast	16	O24335, A0A087HKF2, D7M3Z4, A0A078D332, A0A087GS72, A0A078I437, V4MRK7, M4F776, V4NCN6, A0A087GPG1, V4LGL0, A0A087GGA8, R0HVT6, B9DGT7, A0A087GZ16, A0A087HRE3	477	0.968615	0.999995
GO:0022607	cellular component assembly	7	R0GFS8, Q9FJZ2, A0A087GPG1, D7LZC0, A0A078DWY1, A0A078DVT2, V4NDH1	250	0.968982	0.999995
GO:0004672	protein kinase activity	3	V4L1B6, V4NCN6, R0I0Q4	137	0.96964	0.999995
GO:0015935	small ribosomal subunit	1	A0A075M3M5	69	0.970621	0.999995
GO:0009199	ribonucleoside triphosphate metabolic process	5	Q3ZVC8, A0A078J089, A0A087GS72, A0A087HK48, V4LAE1	197	0.970877	0.999995
GO:0009141	nucleoside triphosphate metabolic process	5	Q3ZVC8, A0A078J089, A0A087GS72, A0A087HK48, V4LAE1	197	0.970877	0.999995
GO:0015078	hydrogen ion transmembrane transporter activity	2	A0A078DLK4, A0A178VRQ2	106	0.971109	0.999995
GO:0043170	macromolecule metabolic process	67	O22256, A0A178V6J6, R0HNM9, Q6DT66, O64730, V4P9U3, A0A078C054, A0A078HL16, R0I6C7, V4JR39, M4EM22, A9Q115, D7KQK4, M4CP65, V4L9M5, A0A078G0J6, V4MK94, M4E415, A0A087GEX4, R0FCA2, R0H6Q5, V4LKQ8, R0HRD5, R0HB45, A0A0D3CQN5, A0A078D332, D7LBB4, Q8LCQ4, R0GFS8, V4L1B6, R0EVU0, M4DWQ5, R0HVT6, A0A078K0T5, A0A087G4X8, D7LTD9, V4JQT7, A0A178VMR4, D7LJI7, A0A078GNK2, D7KLH0, V4L5K5, A0A078G2D0, D6PRM6,…	1628	0.971417	0.999995
GO:0015399	primary active transmembrane transporter activity	3	R0HHY6, A0A078HQA4, A0A078DGF1	139	0.971923	0.999995
GO:0015405	P-P-bond-hydrolysis-driven transmembrane transporter activity	3	R0HHY6, A0A078HQA4, A0A078DGF1	139	0.971923	0.999995
GO:0016042	lipid catabolic process	1	D7KJB1	70	0.972093	0.999995
GO:0016054	organic acid catabolic process	2	A0A078CGS5, A0A178WAU5	107	0.972341	0.999995
GO:0046395	carboxylic acid catabolic process	2	A0A078CGS5, A0A178WAU5	107	0.972341	0.999995
GO:0016818	hydrolase activity, acting on acid anhydrides, in phosphorus-containing anhydrides	10	D7KNV0, M4F776, R0HHY6, M4E415, Q9FJZ2, A0A078C054, A0A078DGF1, R0I6C7, M4EIL0, B9DGT7	333	0.972601	0.999995
GO:0016462	pyrophosphatase activity	10	D7KNV0, M4F776, R0HHY6, M4E415, Q9FJZ2, A0A078C054, A0A078DGF1, R0I6C7, M4EIL0, B9DGT7	333	0.972601	0.999995
GO:0060560	developmental growth involved in morphogenesis	1	P00433	72	0.97482	0.999995
GO:0006468	protein phosphorylation	3	V4L1B6, V4NCN6, R0I0Q4	142	0.975045	0.999995
GO:0016301	kinase activity	8	A0A087H0S8, V4L1B6, V4NCN6, A0A078DDG3, R0I0Q4, V4MRK7, A0A087GZ16, D7LFE3	284	0.975052	0.999995
GO:0044248	cellular catabolic process	15	A0A178V6J6, A0A087G4X8, A0A078CGS5, V4P9U3, V4JQT7, A0A0D3CQN5, R0ETD5, A0A178URS6, A0A087GKB9, A0A078H9S8, A0A0D3AEV6, P00433, A0A178WAU5, F4JHS0, V4LGL0	463	0.975456	0.999995
GO:1990204	oxidoreductase complex	2	A0A175DDT6, A0A0D3A7X4	110	0.975742	0.999995
GO:0016817	hydrolase activity, acting on acid anhydrides	10	D7KNV0, M4F776, R0HHY6, M4E415, Q9FJZ2, A0A078C054, A0A078DGF1, R0I6C7, M4EIL0, B9DGT7	338	0.976114	0.999995
GO:0015077	monovalent inorganic cation transmembrane transporter activity	2	A0A078DLK4, A0A178VRQ2	111	0.976784	0.999995
GO:1901576	organic substance biosynthetic process	62	A0A078J089, A0A087GEG9, Q6DT66, A0A078DXE8, A0A078FM14, A0A078HL16, V4JR39, R0I6C7, V4KUK0, A9Q115, A0A078EGE6, M4CP65, V4L9M5, V4MA11, A0A078G0J6, V4MK94, V4LAE1, V4L870, D7MNW6, A0A087GN96, D7MV68, A0A0D3CQN5, A0A078D332, A0A087HK48, A0A087H276, A0A078F758, O22809, V4L1B6, R0FDJ8, A0A178VQH8, V4LP72, R0HVT6, V4MBI2, A0A078CZL5, A0A087GZ16, O24335, D7LTD9, R0IJD7, A0A178VMR4, D7L694, A0A0D3BFD9,…	1534	0.976825	0.999995
GO:0019693	ribose phosphate metabolic process	7	Q3ZVC8, A0A078J089, A0A087GS72, A0A087HK48, V4LAE1, D7M346, A0A178VCR4	261	0.977865	0.999995
GO:0046872	metal ion binding	46	A0A175DDT6, O24335, D7LF25, A0A087GEG9, A0A087HKF2, A0A178VHR6, A0A0D3C6F4, O64730, V4KN29, A0A178VMR4, A0A078GK07, A0A078FPP2, A0A078DVT2, A9Q115, R0HGQ5, V4L9M5, A0A087GFX9, A0A087H5C5, Q9FK90, A0A0D3AEV6, A0A178WAU5, A0A078BVL6, Q9ZNZ7, R0FGI7, A0A087FY81, V4KQ77, F4HXZ3, V4LIG0, A0A178VP87, D7MV68, M4EIL0, A0A087GS72, Q9LQ26, U5IB74, Q8LCQ4, A0A087HN90, A0A075M3M5, R0G495, A0A0D3A7X4, A0A178V…	1188	0.978711	0.999995
GO:0044425	membrane part	55	A0A087GPI0, A0A078HHR9, A0A078I437, D7KQK4, V4L9M5, D7M3J2, V4K8F1, A0A0D2ZX28, R0GW95, A0A078BVL6, A0A087GEX4, A0A078CI95, Q3ZVC8, V4L870, R0HHY6, A0A178W0Q2, A0A078CTT3, A0A178UV43, Q8LCQ4, M4F776, D7M8K0, A0A178V3V0, A0A087HBX3, A4QJL4, V4L0Y4, R0HVT6, A0A175DDT6, V4KN29, V4JQT7, A0A078DGF1, A0A078GNK2, A0A087HIW3, A0A178UMQ8, Q9FMV3, A0A087GI99, A0A078G1F7, Q9ZNZ7, A0A087GGA8, V4LT85, V4L2R1,…	1388	0.979137	0.999995
GO:0098796	membrane protein complex	11	Q8LCQ4, A0A087HIW3, A0A175DDT6, A0A078G8S3, A0A087GI99, A0A0D3A7X4, A0A078HQA4, A4QJL4, D7LZC0, A0A078BVL6, A0A078CTT3	369	0.979274	0.999995
GO:0044802	single-organism membrane organization	1	O64730	76	0.979503	0.999995
GO:0042626	ATPase activity, coupled to transmembrane movement of substances	2	R0HHY6, A0A078DGF1	114	0.979655	0.999995
GO:0071840	cellular component organization or biogenesis	29	O22256, D7LTD9, O64730, A0A178VMR4, A0A078C054, A0A078J003, A0A078DVT2, D7KLH0, M4E415, Q9FJZ2, A0A087GPG1, A0A087GGA8, A0A087GEX4, V4LT85, A0A078GRZ7, D7LJX7, V4MXR1, A0A078DWY1, A0A078D332, R0GFS8, D7M8K0, A0A087HBX3, A0A078HQA4, P00433, D7LZC0, V4LGL0, R0HVT6, B9DGT7, V4NDH1	806	0.98004	0.999995
GO:0050794	regulation of cellular process	25	D7LTD9, R0F4J2, D7L598, A0A178VMR4, D7L694, R0I6C7, A9Q115, V4L5K5, M4CP65, A0A178VY01, A0A087GFX9, V4MK94, A0A087GPG1, Q9ZNZ7, A0A178W7K7, V4L870, A0A078JT05, A0A0D3CQN5, A0A087GKB9, A0A0D3BRZ5, A0A078FU68, V4L1B6, R0FDJ8, V4NCN6, A0A178WJZ1	713	0.980227	0.999995
GO:0008324	cation transmembrane transporter activity	3	A0A078DLK4, A0A178VRQ2, A0A178UV43	148	0.98033	0.999995
GO:0044763	single-organism cellular process	85	A0A078J089, A0A078CGS5, A0A087GEG9, D7LF25, A0A078DXE8, O64730, D7L598, A0A078FPP2, A0A078HL16, A0A078FM14, V4JR39, V4KUK0, A0A078I437, M4DTX0, A9Q115, A0A078EGE6, M4CP65, V4L9M5, V4MA11, R0GW95, A0A178WAU5, V4LAE1, R0FGI7, A0A087GEH8, Q3ZVC8, V4L870, V4KQ77, D7MNW6, A0A087GN96, D7MV68, A0A0D3CQN5, A0A087GS72, A0A087HK48, A0A087H276, A0A178UV43, A0A078F758, O22809, V4L1B6, R0FDJ8, A0A0D3AG00, V4L…	2038	0.980375	0.999995
GO:0017111	nucleoside-triphosphatase activity	9	D7KNV0, M4F776, R0HHY6, M4E415, Q9FJZ2, A0A078C054, A0A078DGF1, R0I6C7, B9DGT7	319	0.980519	0.999995
GO:0043492	ATPase activity, coupled to movement of substances	2	R0HHY6, A0A078DGF1	115	0.980533	0.999995
GO:0009167	purine ribonucleoside monophosphate metabolic process	5	Q3ZVC8, A0A078J089, A0A087GS72, A0A087HK48, V4LAE1	209	0.980688	0.999995
GO:0009126	purine nucleoside monophosphate metabolic process	5	Q3ZVC8, A0A078J089, A0A087GS72, A0A087HK48, V4LAE1	209	0.980688	0.999995
GO:0006886	intracellular protein transport	6	A0A078HQA4, D7LZC0, A0A078J003, A0A078BVL6, A0A078DVT2, A0A078CTT3	238	0.980968	0.999995
GO:0016820	hydrolase activity, acting on acid anhydrides, catalyzing transmembrane movement of substances	2	R0HHY6, A0A078DGF1	116	0.981375	0.999995
GO:0046128	purine ribonucleoside metabolic process	5	Q3ZVC8, A0A078J089, A0A087GS72, A0A087HK48, V4LAE1	211	0.981986	0.999995
GO:0008270	zinc ion binding	6	Q9FK90, A0A178VMR4, A0A078GK07, A0A078BVL6, R0HVT6, A9Q115	240	0.982185	0.999995
GO:0044765	single-organism transport	10	A0A078DLK4, A0A078I000, D7M8K0, A0A078HQA4, R0HHY6, D7LZC0, A0A078J003, A0A087GGA8, A0A078DVT2, D7LBB4	349	0.982448	0.999995
GO:0012505	endomembrane system	28	A0A087GEG9, A0A0D3B7Y7, V4KQ28, A0A078I437, A0A078DVT2, D7M3J2, V4K8F1, A0A087GPG1, A0A078BVL6, A0A0D3B7A5, A0A078I000, A0A178VP87, A0A078D332, A0A078CTT3, Q9LQ26, A0A178UV43, R0IP21, A0A087G6I6, D7KIH9, A0A078FU68, M4F776, A0A087HBX3, D7LZC0, P00433, V4KKY6, V4LGL0, V4MBI2, R0HVT6	790	0.982759	0.999995
GO:0042278	purine nucleoside metabolic process	5	Q3ZVC8, A0A078J089, A0A087GS72, A0A087HK48, V4LAE1	213	0.983203	0.999995
GO:0044391	ribosomal subunit	3	A0A075M3M5, A0A078DWY1, A0A078D332	152	0.983242	0.999995
GO:0044282	small molecule catabolic process	3	A0A078CGS5, A0A178WAU5, A0A0D3CQN5	152	0.983242	0.999995
GO:0004812	aminoacyl-tRNA ligase activity	1	A0A0D3EAC9	80	0.983318	0.999995
GO:0006418	tRNA aminoacylation for protein translation	1	A0A0D3EAC9	80	0.983318	0.999995
GO:0016876	ligase activity, forming aminoacyl-tRNA and related compounds	1	A0A0D3EAC9	81	0.984155	0.999995
GO:0048589	developmental growth	1	P00433	81	0.984155	0.999995
GO:0016875	ligase activity, forming carbon-oxygen bonds	1	A0A0D3EAC9	81	0.984155	0.999995
GO:0043169	cation binding	46	A0A175DDT6, O24335, A0A087GEG9, D7LF25, A0A087HKF2, A0A178VHR6, O64730, A0A0D3C6F4, V4KN29, A0A178VMR4, A0A078GK07, A0A078FPP2, A0A078DVT2, A9Q115, R0HGQ5, V4L9M5, A0A087GFX9, A0A087H5C5, Q9FK90, A0A0D3AEV6, A0A178WAU5, Q9ZNZ7, A0A078BVL6, R0FGI7, A0A087FY81, V4KQ77, V4LIG0, F4HXZ3, A0A178VP87, D7MV68, M4EIL0, A0A087GS72, Q9LQ26, U5IB74, Q8LCQ4, A0A087HN90, A0A075M3M5, R0G495, A0A0D3A7X4, R0FDJ8,…	1207	0.984686	0.999995
GO:0043039	tRNA aminoacylation	1	A0A0D3EAC9	82	0.984951	0.999995
GO:0043038	amino acid activation	1	A0A0D3EAC9	82	0.984951	0.999995
GO:0035556	intracellular signal transduction	2	V4L1B6, V4NCN6	121	0.985082	0.999995
GO:1901659	glycosyl compound biosynthetic process	2	D7LJX7, D7MV68	121	0.985082	0.999995
GO:0046483	heterocycle metabolic process	36	A0A078J089, A0A087G4X8, R0HNM9, D7LTD9, D7LKW5, A0A178VMR4, A0A178VYZ1, A0A078FM14, V4JR39, A0A0D3BFD9, D7KLH0, D7M346, D7KQK4, A0A078CAC6, M4CP65, V4MK94, D7LYF5, A0A178W7K7, V4LAE1, A0A178VCR4, Q3ZVC8, A0A087GU96, V4L870, D7MNW6, V4MXR1, A0A0D3CQN5, A0A087GS72, A0A087HK48, A0A087GKB9, A0A0D3EAC9, V4L1B6, R0FDJ8, A0A178WJZ1, V4LP72, V4LGL0, A0A087GZ16	984	0.985575	0.999995
GO:0098662	inorganic cation transmembrane transport	2	A0A078DLK4, A0A178VRQ2	122	0.985732	0.999995
GO:0005525	GTP binding	3	D7KNV0, Q9FJZ2, B9DGT7	156	0.98574	0.999995
GO:0019001	guanyl nucleotide binding	3	D7KNV0, Q9FJZ2, B9DGT7	156	0.98574	0.999995
GO:0032561	guanyl ribonucleotide binding	3	D7KNV0, Q9FJZ2, B9DGT7	156	0.98574	0.999995
GO:0005524	ATP binding	29	D7KNV0, O24335, A0A178VHR6, A0A078C054, D7LJI7, R0I6C7, R0G9G5, A0A078DGF1, A0A078DVT2, V4MRK7, D7KLH0, D7LFE3, E4MYB4, M4E415, A0A0D3CAN6, A0A178WAU5, R0I0Q4, E4MXN5, A0A078JR63, R0HHY6, A0A078IKL8, R0HRD5, Q9S9N1, A0A0D3EAC9, M4F776, V4L1B6, V4NCN6, V4M9A1, A0A087GZ16	823	0.985845	0.999995
GO:0044257	cellular protein catabolic process	2	A0A087G4X8, V4P9U3	123	0.986355	0.999995
GO:0098588	bounding membrane of organelle	17	R0HHY6, A0A078D332, A0A178VRQ2, A0A087GS72, A0A078I437, D7M9X2, A0A078CTT3, A0A078DVT2, R0I486, D7M3J2, V4K8F1, A0A078HQA4, A0A087HBX3, P00433, A0A078BVL6, B9DGT7, A0A178VCR4	537	0.986495	0.999995
GO:0043412	macromolecule modification	13	O64730, A0A178VMR4, D7MV45, A0A0D3CQN5, A0A087HN90, Q8LCQ4, R0GFS8, V4L1B6, V4NCN6, R0I0Q4, R0FCA2, A0A178UA59, V4NDH1	437	0.986758	0.999995
GO:0044464	cell part	225	A0A087GEG9, A0A078CGS5, V4P9U3, D7L598, V4KQ28, A0A078C054, A0A078J003, A0A178VTR1, V4KUK0, A9Q115, V4KJE9, A0A087H5E9, A0A078G0J6, A0A087G8N1, A0A087GEX4, R0FCA2, R0FGI7, A0A0D3B7A5, A0A087GEH8, D7MNW6, D7MV68, R0GFS8, D7M7I2, D7MUT9, V4L1B6, D7M8K0, A4QJL4, D7MDS7, V4KKY6, A0A087GZ16, A0A087G4X8, D7LKW5, A0A178VMR4, A0A178VYZ1, D7M346, D7M4F3, V4LMW1, A0A078IRE8, A0A087GU96, V4L2R1, A0A078GRZ7,…	4873	0.9868	0.999995
GO:0009150	purine ribonucleotide metabolic process	5	Q3ZVC8, A0A078J089, A0A087GS72, A0A087HK48, V4LAE1	220	0.986881	0.999995
GO:0098660	inorganic ion transmembrane transport	2	A0A078DLK4, A0A178VRQ2	124	0.986951	0.999995
GO:0098655	cation transmembrane transport	2	A0A078DLK4, A0A178VRQ2	124	0.986951	0.999995
GO:0016070	RNA metabolic process	11	M4CP65, A0A087GU96, R0HNM9, D7LTD9, A0A0D3EAC9, V4MK94, A0A178VMR4, V4MXR1, A0A0D3CQN5, A0A178W7K7, V4JR39	386	0.987061	0.999995
GO:0005829	cytosol	55	A0A078J089, A0A078CGS5, Q6DT66, R0I6C7, A0A078I437, A0A0D2ZXS4, V4MRK7, A9Q115, V4KJE9, A0A0D3D7X1, M4D7S0, R0HQS0, A0A087G8N1, R0GW95, A0A178WAU5, A0A078BVL6, E4MXN5, V4LAE1, R0INE7, A0A0D3CQN5, A0A078D332, A0A087GS72, A0A087HK48, A0A178VQH8, V4LP72, B9DGT7, A0A087GZ16, O24335, D7LKW5, R0F4J2, A0A178VMR4, A0A178VYZ1, D7L694, A0A078DVT2, D7KLH0, D7M346, E4MYB4, D7M4F3, A0A087H5C5, Q9FK90, A0A0D3A…	1419	0.987561	0.999995
GO:0016049	cell growth	1	P00433	86	0.987754	0.999995
GO:0032559	adenyl ribonucleotide binding	29	D7KNV0, O24335, A0A178VHR6, A0A078C054, D7LJI7, R0I6C7, R0G9G5, A0A078DGF1, A0A078DVT2, V4MRK7, D7KLH0, D7LFE3, E4MYB4, M4E415, A0A0D3CAN6, A0A178WAU5, R0I0Q4, E4MXN5, A0A078JR63, R0HHY6, A0A078IKL8, R0HRD5, Q9S9N1, A0A0D3EAC9, M4F776, V4L1B6, V4NCN6, V4M9A1, A0A087GZ16	830	0.987759	0.999995
GO:0005840	ribosome	8	A0A075M3M5, O24335, A0A078G0J6, V4MXR1, A0A078DWY1, A0A078D332, A0A078D9Z2, A0A078DVT2	308	0.987983	0.999995
GO:0098800	inner mitochondrial membrane protein complex	1	A0A078HQA4	87	0.988369	0.999995
GO:0015075	ion transmembrane transporter activity	4	A0A078DLK4, A0A078HQA4, A0A178VRQ2, A0A178UV43	193	0.988384	0.999995
GO:0034613	cellular protein localization	6	A0A078HQA4, D7LZC0, A0A078BVL6, A0A078J003, A0A078CTT3, A0A078DVT2	253	0.988491	0.999995
GO:0005773	vacuole	20	V4P9U3, R0HHY6, A0A078D332, A0A178VRQ2, A0A087GS72, A0A078I437, D7M9X2, A0A078DVT2, A0A078FU68, R0I486, D7M3J2, A0A087HBX3, A0A078HQA4, A0A087GPG1, P00433, V4LGL0, A0A087GGA8, B9DGT7, A0A178VCR4, D7MH74	618	0.988626	0.999995
GO:0009161	ribonucleoside monophosphate metabolic process	5	Q3ZVC8, A0A078J089, A0A087GS72, A0A087HK48, V4LAE1	224	0.988628	0.999995
GO:0006163	purine nucleotide metabolic process	5	Q3ZVC8, A0A078J089, A0A087GS72, A0A087HK48, V4LAE1	225	0.989029	0.999995
GO:0030554	adenyl nucleotide binding	29	D7KNV0, O24335, A0A178VHR6, A0A078C054, D7LJI7, R0I6C7, R0G9G5, A0A078DGF1, A0A078DVT2, V4MRK7, D7KLH0, D7LFE3, E4MYB4, M4E415, A0A0D3CAN6, A0A178WAU5, R0I0Q4, E4MXN5, A0A078JR63, R0HHY6, A0A078IKL8, R0HRD5, Q9S9N1, A0A0D3EAC9, M4F776, V4L1B6, V4NCN6, V4M9A1, A0A087GZ16	836	0.989211	0.999995
GO:0009123	nucleoside monophosphate metabolic process	5	Q3ZVC8, A0A078J089, A0A087GS72, A0A087HK48, V4LAE1	226	0.989417	0.999995
GO:0009119	ribonucleoside metabolic process	5	Q3ZVC8, A0A078J089, A0A087GS72, A0A087HK48, V4LAE1	226	0.989417	0.999995
GO:0005623	cell	225	A0A087GEG9, A0A078CGS5, V4P9U3, D7L598, V4KQ28, A0A078C054, A0A078J003, A0A178VTR1, V4KUK0, A9Q115, V4KJE9, A0A087H5E9, A0A078G0J6, A0A087G8N1, A0A087GEX4, R0FCA2, R0FGI7, A0A0D3B7A5, A0A087GEH8, D7MNW6, D7MV68, R0GFS8, D7M7I2, D7MUT9, V4L1B6, D7M8K0, A4QJL4, D7MDS7, V4KKY6, A0A087GZ16, A0A087G4X8, D7LKW5, A0A178VMR4, A0A178VYZ1, D7M346, D7M4F3, V4LMW1, A0A078IRE8, A0A087GU96, V4L2R1, A0A078GRZ7,…	4888	0.989862	0.999995
GO:0000287	magnesium ion binding	2	A0A075M3M5, M4EIL0	130	0.990032	0.999995
GO:0044249	cellular biosynthetic process	57	A0A078J089, A0A087GEG9, Q6DT66, A0A078DXE8, A0A078FM14, A0A078HL16, V4JR39, R0I6C7, V4KUK0, A9Q115, A0A078EGE6, M4CP65, V4MA11, A0A078G0J6, V4MK94, V4LAE1, V4L870, D7MNW6, A0A087GN96, D7MV68, A0A0D3CQN5, A0A078D332, A0A087HK48, A0A087H276, A0A078F758, O22809, V4L1B6, R0FDJ8, V4LP72, R0HVT6, V4MBI2, A0A078CZL5, A0A087GZ16, O24335, D7LTD9, R0IJD7, A0A178VMR4, D7L694, A0A0D3BFD9, D7KLH0, D7LFE3, G4W…	1476	0.990041	0.999995
GO:0098805	whole membrane	15	R0HHY6, A0A078D332, A0A178VRQ2, A0A087GS72, A0A078I437, D7M9X2, A0A078DVT2, R0I486, D7M3J2, A0A078HQA4, A0A087HBX3, P00433, A0A078BVL6, B9DGT7, A0A178VCR4	499	0.990093	0.999995
GO:0061024	membrane organization	1	O64730	91	0.990537	0.999995
GO:1901566	organonitrogen compound biosynthetic process	33	O24335, Q6DT66, A0A087GEG9, D7LTD9, A0A078FM14, R0I6C7, V4JR39, A0A0D3BFD9, A9Q115, D7KLH0, A0A078EGE6, A0A087GFX9, A0A078G0J6, D7LYF5, Q9ZNZ7, V4L870, D7LJX7, D7MNW6, D7MV68, A0A078DWY1, A0A078D332, A0A078D9Z2, A0A087H276, A0A087G6I6, A0A075M3M5, A0A0D3C4T3, A0A0D3EAC9, V4L1B6, R0FDJ8, A0A178WJZ1, V4LP72, A0A078CZL5, A0A087GZ16	937	0.990747	0.999995
GO:0000902	cell morphogenesis	1	P00433	92	0.991013	0.999995
GO:1901564	organonitrogen compound metabolic process	52	A0A078J089, A0A078CGS5, Q6DT66, A0A087GEG9, A0A078FM14, V4JR39, R0I6C7, M4DTX0, A9Q115, A0A078EGE6, A0A078G0J6, A0A178WAU5, V4LAE1, Q3ZVC8, V4L870, D7MNW6, D7MV68, A0A078D332, A0A087GS72, A0A087HK48, A0A087H276, V4L1B6, R0FDJ8, V4LP72, M4DWQ5, A0A078CZL5, A0A087GZ16, A0A087G4X8, O24335, D7LTD9, D7LKW5, A0A178VYZ1, R0ETD5, A0A0D3BFD9, D7KLH0, D7M346, A0A087GFX9, D7LYF5, M4DYT6, Q9ZNZ7, A0A178VCR4,…	1371	0.991043	0.999995
GO:0071704	organic substance metabolic process	137	A0A078J089, A0A078CGS5, A0A087GEG9, V4P9U3, A0A078C054, V4KUK0, A0A078I437, M4DTX0, A9Q115, A0A078EGE6, D7KQK4, A0A078G0J6, V4MK94, A0A087GEX4, R0FCA2, A0A0D3AEY2, V4L870, R0H6Q5, D7MNW6, A0A087GN96, D7MV68, D7LBB4, A0A087H276, Q8LCQ4, R0GFS8, V4L1B6, R0FDJ8, V4LP72, V4MBI2, A0A087GZ16, A0A078K0T5, A0A087G4X8, D7LKW5, V4JQT7, A0A178VMR4, A0A178VYZ1, A0A078GNK2, D7LFE3, D7M346, G4WXD8, A0A0D3BFD9,…	3171	0.991166	0.999995
GO:0009117	nucleotide metabolic process	7	Q3ZVC8, A0A078J089, A0A087GS72, A0A087HK48, V4LAE1, D7M346, A0A178VCR4	291	0.991582	0.999995
GO:0006753	nucleoside phosphate metabolic process	7	Q3ZVC8, A0A078J089, A0A087GS72, A0A087HK48, V4LAE1, D7M346, A0A178VCR4	292	0.991857	0.999995
GO:0032989	cellular component morphogenesis	1	P00433	94	0.991894	0.999995
GO:0010467	gene expression	24	R0HNM9, Q6DT66, D7LTD9, A0A178VMR4, A0A078C054, R0I6C7, V4JR39, A9Q115, M4CP65, V4MK94, A0A078G0J6, M4E415, A0A178W7K7, A0A087GU96, V4MXR1, R0HRD5, A0A0D3CQN5, A0A078DWY1, A0A078D332, A0A078D9Z2, A0A087G6I6, A0A075M3M5, A0A0D3EAC9, A0A0D3BYG4	731	0.992125	0.999995
GO:0019637	organophosphate metabolic process	10	Q3ZVC8, A0A078J089, A0A078DDG3, V4LP72, A0A087GS72, A0A087HK48, V4LAE1, D7LFE3, D7M346, A0A178VCR4	377	0.992279	0.999995
GO:0098798	mitochondrial protein complex	1	A0A078HQA4	95	0.992302	0.999995
GO:1902494	catalytic complex	7	A0A175DDT6, R0IG50, A0A0D3A7X4, R0FDJ8, A0A178WJZ1, V4KUK0, G4WXD8	294	0.992384	0.999995
GO:0030163	protein catabolic process	2	A0A087G4X8, V4P9U3	137	0.992737	0.999995
GO:0090304	nucleic acid metabolic process	12	A0A087GU96, R0HNM9, D7LTD9, A0A178VMR4, V4MXR1, A0A0D3CQN5, V4JR39, D7KQK4, M4CP65, A0A0D3EAC9, V4MK94, A0A178W7K7	433	0.992823	0.999995
GO:0009259	ribonucleotide metabolic process	5	Q3ZVC8, A0A078J089, A0A087GS72, A0A087HK48, V4LAE1	237	0.992908	0.999995
GO:0003735	structural constituent of ribosome	5	A0A075M3M5, A0A078G0J6, A0A078DWY1, A0A078D332, A0A078D9Z2	238	0.993164	0.999995
GO:0019538	protein metabolic process	44	A0A078K0T5, A0A087G4X8, Q6DT66, D7LTD9, O64730, V4P9U3, A0A178VMR4, A0A078C054, D7LJI7, R0I6C7, M4EM22, A0A078GNK2, A9Q115, V4L5K5, A0A078G2D0, D6PRM6, A0A078G0J6, M4E415, R0I0Q4, R0FCA2, R0H6Q5, D7MV45, R0HB45, R0HRD5, A0A0D3CQN5, A0A078DWY1, A0A078D332, A0A078D9Z2, D7LBB4, A0A087HN90, A0A087G6I6, Q8LCQ4, R0GFS8, A0A075M3M5, A0A0D3EAC9, A0A078H717, V4L1B6, A0A0D3BYG4, V4NCN6, V4M9A1, R0G8R2, E4M…	1206	0.993266	0.999995
GO:0004674	protein serine/threonine kinase activity	1	V4L1B6	98	0.993406	0.999995
GO:0009116	nucleoside metabolic process	5	Q3ZVC8, A0A078J089, A0A087GS72, A0A087HK48, V4LAE1	239	0.993412	0.999995
GO:1902600	hydrogen ion transmembrane transport	1	A0A078DLK4	99	0.993738	0.999995
GO:0070727	cellular macromolecule localization	6	A0A078HQA4, D7LZC0, A0A078BVL6, A0A078J003, A0A078CTT3, A0A078DVT2	271	0.993839	0.999995
GO:0005743	mitochondrial inner membrane	2	D7M8K0, A0A078HQA4	141	0.993945	0.999995
GO:0016772	transferase activity, transferring phosphorus-containing groups	8	A0A087H0S8, V4L1B6, V4NCN6, A0A078DDG3, R0I0Q4, V4MRK7, A0A087GZ16, D7LFE3	331	0.994252	0.999995
GO:0016020	membrane	106	A0A087H0S8, A0A078J003, A0A078I437, D7KQK4, D7M3J2, A0A078BVL6, E4MXN5, A0A087GEX4, R0FGI7, A0A087GEH8, V4L870, A0A178W0Q2, A0A078CTT3, Q8LCQ4, R0GFS8, M4F776, D7M8K0, A0A087HBX3, A4QJL4, V4L0Y4, B9DGT7, A0A175DDT6, A0A087G4X8, V4KN29, V4JQT7, A0A078DGF1, A0A078GNK2, A0A078DVT2, A0A087HIW3, E4MYB4, A0A078G2D0, A0A087GI99, A0A087GPG1, V4L2R1, A0A078I000, D7M9X2, R0G495, Q6DBN2, V4NCN6, D7LZC0, P00…	2560	0.994276	0.999995
GO:0005794	Golgi apparatus	14	A0A087GEG9, A0A178VP87, A0A078D332, A0A078I437, A0A078DVT2, A0A078CTT3, A0A087G6I6, A0A078FU68, D7M3J2, M4F776, V4K8F1, A0A087GPG1, P00433, R0HVT6	498	0.994955	0.999995
GO:0072521	purine-containing compound metabolic process	5	Q3ZVC8, A0A078J089, A0A087GS72, A0A087HK48, V4LAE1	248	0.995286	0.999995
GO:0048869	cellular developmental process	2	P00433, V4MBI2	147	0.995398	0.999995
GO:0031090	organelle membrane	24	V4JR39, A0A078I437, A0A078GNK2, A0A078DVT2, A0A178UMQ8, R0I486, D7M3J2, V4K8F1, A0A078BVL6, A0A178VCR4, R0IG50, R0HHY6, A0A078D332, A0A178VRQ2, A0A087GS72, D7M9X2, A0A078CTT3, D7M8K0, A0A078HQA4, A0A087HBX3, A4QJL4, D7LZC0, P00433, B9DGT7	755	0.995539	0.999995
GO:0044446	intracellular organelle part	91	A0A087GRU5, A0A078J089, A0A178V6J6, D7KNV0, R0HNM9, D7LF25, A0A087GEG9, O64730, Q9SIN5, D7L598, A0A078FPP2, A0A078C054, R0I6C7, R0G9G5, V4JR39, A0A078J003, A0A178VTR1, V4KUK0, A0A078I437, A0A0D3D7X1, D7M3J2, V4K8F1, M4E415, A0A078BVL6, V4LAE1, R0FGI7, A0A087GEH8, Q3ZVC8, V4L870, V4KQ77, F4HXZ3, D7MNW6, R0HHY6, D7MV68, A0A178W0Q2, A0A0D3CQN5, A0A078D332, A0A087GS72, A0A087HK48, A0A078CTT3, A0A178U…	2260	0.995625	0.999995
GO:0006818	hydrogen transport	1	A0A078DLK4	106	0.995639	0.999995
GO:0015992	proton transport	1	A0A078DLK4	106	0.995639	0.999995
GO:0046907	intracellular transport	6	A0A078HQA4, D7LZC0, A0A078BVL6, A0A078J003, A0A078CTT3, A0A078DVT2	281	0.995685	0.999995
GO:0043167	ion binding	86	D7KNV0, A0A087GEG9, D7LF25, A0A178VHR6, O64730, A0A078DXE8, A0A078FPP2, A0A078C054, R0I6C7, R0G9G5, V4JR39, V4NYR7, V4KUK0, V4MRK7, Q8LFU3, A9Q115, V4L9M5, M4E415, Q9FJZ2, A0A178WAU5, A0A0D3CAN6, A0A078BVL6, E4MXN5, R0FGI7, A0A078JR63, V4KQ77, F4HXZ3, D7MNW6, R0HHY6, A0A078IKL8, D7MV68, R0HRD5, A0A087GS72, U5IB74, Q8LCQ4, M4F776, V4L1B6, R0FDJ8, A0A178V3V0, A0A178VQH8, V4LP72, R0HVT6, A0A078CZL5,…	2155	0.995744	0.999995
GO:0044422	organelle part	91	A0A087GRU5, A0A078J089, A0A178V6J6, D7KNV0, R0HNM9, D7LF25, A0A087GEG9, O64730, Q9SIN5, D7L598, A0A078FPP2, A0A078C054, R0I6C7, R0G9G5, V4JR39, A0A078J003, A0A178VTR1, V4KUK0, A0A078I437, A0A0D3D7X1, D7M3J2, V4K8F1, M4E415, A0A078BVL6, V4LAE1, R0FGI7, A0A087GEH8, Q3ZVC8, V4L870, V4KQ77, F4HXZ3, D7MNW6, R0HHY6, D7MV68, A0A178W0Q2, A0A0D3CQN5, A0A078D332, A0A087GS72, A0A087HK48, A0A078CTT3, A0A178U…	2263	0.995845	0.999995
GO:0044455	mitochondrial membrane part	1	A0A078HQA4	110	0.996454	0.999995
GO:0006810	transport	26	D7LF25, A0A087HKF2, A0A078FPP2, A0A078DGF1, A0A078J003, A0A078I437, A0A078DVT2, R0GW95, A0A078BVL6, A0A087GGA8, A0A0D3B7A5, R0FGI7, A0A087FY81, Q3ZVC8, V4L870, V4KQ77, A0A078I000, R0HHY6, A0A178VP87, A0A178VRQ2, A0A078CTT3, D7LBB4, A0A078DLK4, D7M8K0, A0A078HQA4, D7LZC0	815	0.996591	0.999995
GO:0045333	cellular respiration	1	Q3ZVC8	111	0.996633	0.999995
GO:0044265	cellular macromolecule catabolic process	2	A0A087G4X8, V4P9U3	154	0.996666	0.999995
GO:0043168	anion binding	45	D7KNV0, O24335, A0A178VHR6, R0F4J2, A0A078DXE8, A0A078C054, D7LJI7, D7L694, R0I6C7, R0G9G5, A0A078DGF1, V4JR39, V4NYR7, V4KUK0, A0A078DVT2, V4MRK7, Q8LFU3, A0A0D3BFD9, D7KLH0, D7LFE3, G4WXD8, E4MYB4, M4E415, Q9FJZ2, A0A178WAU5, A0A0D3CAN6, R0I0Q4, M4DYT6, E4MXN5, A0A078IRE8, A0A078JR63, D7MNW6, R0HHY6, A0A178VP87, A0A078IKL8, R0HRD5, Q9S9N1, A0A0D3EAC9, M4F776, V4L1B6, V4NCN6, V4M9A1, B9DGT7, A0A…	1264	0.99668	0.999995
GO:0005634	nucleus	36	A0A078J089, R0HNM9, D7LKW5, M4CRD7, A0A178VMR4, A0A178VYZ1, D7L694, R0I6C7, A0A0D2ZXS4, A0A178VTR1, A9Q115, M4CP65, A0A087H5E9, Q9FK90, A0A087G8N1, R0GW95, F4JHS0, A0A178W7K7, A0A078J7C1, A0A0D3B7A5, A0A087GU96, A0A087GEF5, V4NSS7, A0A087GKF4, V4MXR1, A0A178VP87, A0A0D3CQN5, A0A078D332, A0A087GS72, A0A078D9Z2, A0A178UV43, V4L1B6, D7LZC0, V4LGL0, D7LQI9, B9DGT7	1056	0.996735	0.999995
GO:0005198	structural molecule activity	7	A0A075M3M5, A0A078G0J6, Q6DBN2, A0A078DWY1, A0A078D332, A0A078D9Z2, B9DGT7	322	0.99709	0.999995
GO:0034654	nucleobase-containing compound biosynthetic process	6	M4CP65, D7LTD9, V4MK94, A0A178VMR4, A0A0D3CQN5, A0A178W7K7	292	0.997105	0.999995
GO:0051649	establishment of localization in cell	6	A0A078HQA4, D7LZC0, A0A078BVL6, A0A078J003, A0A078CTT3, A0A078DVT2	292	0.997105	0.999995
GO:0051603	proteolysis involved in cellular protein catabolic process	1	V4P9U3	114	0.997117	0.999995
GO:0051234	establishment of localization	26	D7LF25, A0A087HKF2, A0A078FPP2, A0A078DGF1, A0A078J003, A0A078I437, A0A078DVT2, R0GW95, A0A078BVL6, A0A087GGA8, A0A0D3B7A5, R0FGI7, A0A087FY81, Q3ZVC8, V4L870, V4KQ77, A0A078I000, R0HHY6, A0A178VP87, A0A178VRQ2, A0A078CTT3, D7LBB4, A0A078DLK4, D7M8K0, A0A078HQA4, D7LZC0	824	0.997261	0.999995
GO:0055086	nucleobase-containing small molecule metabolic process	7	Q3ZVC8, A0A078J089, A0A087GS72, A0A087HK48, V4LAE1, D7M346, A0A178VCR4	325	0.997382	0.999995
GO:0003723	RNA binding	12	A0A087G6I6, A0A075M3M5, A0A087GEH8, A0A087GU96, A0A0D3D7X1, Q6DT66, D7LTD9, Q9FJZ2, V4MXR1, A0A078DWY1, A0A078D332, B9DGT7	467	0.99739	0.999995
GO:0005740	mitochondrial envelope	3	D7M8K0, A0A078HQA4, A0A087GS72	197	0.99743	0.999995
GO:0016192	vesicle-mediated transport	3	A0A178VP87, A0A078BVL6, A0A0D3B7A5	197	0.99743	0.999995
GO:0005509	calcium ion binding	1	A0A0D3A7X4	117	0.997532	0.999995
GO:1901137	carbohydrate derivative biosynthetic process	3	A0A178UMQ8, D7LJX7, D7MV68	198	0.997538	0.999995
GO:0051179	localization	27	D7LF25, A0A087HKF2, A0A078FPP2, A0A078J003, A0A078DGF1, A0A078I437, A0A078DVT2, R0GW95, A0A078BVL6, A0A087GGA8, A0A0D3B7A5, R0FGI7, A0A087FY81, Q3ZVC8, V4L870, V4KQ77, A0A078I000, R0HHY6, A0A178VP87, A0A178VRQ2, A0A078CTT3, A0A178UV43, D7LBB4, A0A078DLK4, D7M8K0, A0A078HQA4, D7LZC0	856	0.997723	0.999995
GO:0009059	macromolecule biosynthetic process	20	Q6DT66, D7LTD9, A0A178VMR4, A0A078HL16, A0A0D3CQN5, A0A078DWY1, R0I6C7, A0A078D332, A0A078D9Z2, A9Q115, D7KLH0, A0A087G6I6, A0A075M3M5, M4CP65, V4L9M5, A0A0D3EAC9, V4MK94, A0A078G0J6, A0A178W7K7, R0HVT6	686	0.997974	0.999995
GO:0040007	growth	1	P00433	121	0.997994	0.999995
GO:0007154	cell communication	7	A0A178UMQ8, A0A0D3BRZ5, A0A178VY01, M4F776, V4L1B6, V4NCN6, A0A078JT05	334	0.9981	0.999995
GO:0015672	monovalent inorganic cation transport	1	A0A078DLK4	123	0.998192	0.999995
GO:0006793	phosphorus metabolic process	21	Q3ZVC8, A0A078J089, O64730, A0A078DDG3, D7L694, A0A087GS72, M4EIL0, A0A087HK48, V4MRK7, D7KLH0, D7M346, D7LFE3, R0HGQ5, V4L1B6, V4NCN6, R0I0Q4, V4LP72, V4MBI2, V4LAE1, A0A178VCR4, A0A087GZ16	718	0.998302	0.999995
GO:0042623	ATPase activity, coupled	2	R0HHY6, A0A078DGF1	169	0.998339	0.999995
GO:0007165	signal transduction	5	A0A0D3BRZ5, A0A178VY01, V4L1B6, V4NCN6, A0A078JT05	276	0.998386	0.999995
GO:0043231	intracellular membrane-bounded organelle	164	Q93ZN4, A0A078J089, D7KNV0, D7LF25, A0A087GEG9, A0A178VHR6, Q9SIN5, V4P9U3, D7L598, A0A0D3B7Y7, V4KQ28, A0A078C054, A0A078J003, A0A078I437, V4KUK0, A0A178VTR1, A9Q115, A0A087H5E9, D7M3J2, R0GSV2, A0A087G8N1, R0FGI7, A0A0D3B7A5, A0A087GEH8, A0A078D5C6, V4L870, D7MNW6, D7MV68, A0A178W0Q2, A0A078CTT3, Q8LCQ4, R0GFS8, D7M7I2, D7MUT9, M4F776, V4L1B6, D7M8K0, R0FDJ8, A0A087HBX3, A4QJL4, D7MDS7, V4KKY6,…	3814	0.998424	0.999995
GO:0097367	carbohydrate derivative binding	33	D7KNV0, O24335, A0A178VHR6, A0A078DXE8, A0A078C054, D7LJI7, R0I6C7, R0G9G5, A0A078DGF1, A0A078DVT2, V4MRK7, D7KLH0, D7LFE3, E4MYB4, M4E415, Q9FJZ2, A0A0D3CAN6, A0A178WAU5, R0I0Q4, E4MXN5, A0A078JR63, R0HHY6, A0A078IKL8, R0HRD5, Q9S9N1, A0A0D3EAC9, M4F776, V4L1B6, V4NCN6, V4M9A1, M4DWQ5, B9DGT7, A0A087GZ16	1017	0.998441	0.999995
GO:0023052	signaling	5	A0A0D3BRZ5, A0A178VY01, V4L1B6, V4NCN6, A0A078JT05	277	0.998448	0.999995
GO:0044700	single organism signaling	5	A0A0D3BRZ5, A0A178VY01, V4L1B6, V4NCN6, A0A078JT05	277	0.998448	0.999995
GO:0006412	translation	11	A0A087G6I6, A0A075M3M5, Q6DT66, D7LTD9, A0A0D3EAC9, A0A078G0J6, A0A078DWY1, R0I6C7, A0A078D332, A0A078D9Z2, A9Q115	457	0.998503	0.999995
GO:0043227	membrane-bounded organelle	165	Q93ZN4, A0A078J089, D7KNV0, D7LF25, A0A087GEG9, A0A178VHR6, Q9SIN5, V4P9U3, D7L598, A0A0D3B7Y7, V4KQ28, A0A078C054, A0A078J003, A0A078I437, V4KUK0, A0A178VTR1, A9Q115, A0A087H5E9, D7M3J2, R0GSV2, A0A087G8N1, A0A078BVL6, R0FGI7, A0A0D3B7A5, A0A087GEH8, A0A078D5C6, V4L870, D7MNW6, D7MV68, A0A178W0Q2, A0A078CTT3, Q8LCQ4, R0GFS8, D7M7I2, D7MUT9, M4F776, V4L1B6, D7M8K0, R0FDJ8, A0A087HBX3, A4QJL4, D7M…	3837	0.998518	0.999995
GO:0035639	purine ribonucleoside triphosphate binding	31	D7KNV0, O24335, A0A178VHR6, A0A078C054, D7LJI7, R0I6C7, R0G9G5, A0A078DGF1, A0A078DVT2, V4MRK7, D7KLH0, D7LFE3, E4MYB4, M4E415, Q9FJZ2, A0A0D3CAN6, A0A178WAU5, R0I0Q4, E4MXN5, A0A078JR63, R0HHY6, A0A078IKL8, R0HRD5, Q9S9N1, A0A0D3EAC9, M4F776, V4L1B6, V4NCN6, V4M9A1, B9DGT7, A0A087GZ16	971	0.998522	0.999995
GO:0032553	ribonucleotide binding	32	D7KNV0, O24335, A0A178VHR6, A0A078DXE8, A0A078C054, D7LJI7, R0I6C7, R0G9G5, A0A078DGF1, A0A078DVT2, V4MRK7, D7KLH0, D7LFE3, E4MYB4, M4E415, Q9FJZ2, A0A0D3CAN6, A0A178WAU5, R0I0Q4, E4MXN5, A0A078JR63, R0HHY6, A0A078IKL8, R0HRD5, Q9S9N1, A0A0D3EAC9, M4F776, V4L1B6, V4NCN6, V4M9A1, B9DGT7, A0A087GZ16	996	0.998551	0.999995
GO:0034645	cellular macromolecule biosynthetic process	19	Q6DT66, D7LTD9, A0A178VMR4, A0A078HL16, A0A0D3CQN5, A0A078DWY1, R0I6C7, A0A078D332, A0A078D9Z2, A9Q115, D7KLH0, A0A087G6I6, A0A075M3M5, M4CP65, A0A0D3EAC9, V4MK94, A0A078G0J6, A0A178W7K7, R0HVT6	673	0.998569	0.999995
GO:0005886	plasma membrane	30	O24335, A0A087H0S8, A0A087GPI0, R0IJD7, A0A078I437, A0A0D2ZXS4, A0A178UMQ8, E4MYB4, R0GW95, A0A087GPG1, R0I5Y8, R0I0Q4, A0A087GGA8, E4MXN5, A0A078CI95, V4L2R1, R0I5H3, V4MKD3, A0A087GS72, A0A078CTT3, A0A087G6I6, A0A078FU68, Q9S9N1, M4F776, A0A178V3V0, V4NCN6, R0HVT6, B9DGT7, V4K9A3, A0A087HRE3	950	0.998635	0.999995
GO:0015980	energy derivation by oxidation of organic compounds	1	Q3ZVC8	130	0.998742	0.999995
GO:0001883	purine nucleoside binding	31	D7KNV0, O24335, A0A178VHR6, A0A078C054, D7LJI7, R0I6C7, R0G9G5, A0A078DGF1, A0A078DVT2, V4MRK7, D7KLH0, D7LFE3, E4MYB4, M4E415, Q9FJZ2, A0A0D3CAN6, A0A178WAU5, R0I0Q4, E4MXN5, A0A078JR63, R0HHY6, A0A078IKL8, R0HRD5, Q9S9N1, A0A0D3EAC9, M4F776, V4L1B6, V4NCN6, V4M9A1, B9DGT7, A0A087GZ16	978	0.998754	0.999995
GO:0032555	purine ribonucleotide binding	31	D7KNV0, O24335, A0A178VHR6, A0A078C054, D7LJI7, R0I6C7, R0G9G5, A0A078DGF1, A0A078DVT2, V4MRK7, D7KLH0, D7LFE3, E4MYB4, M4E415, Q9FJZ2, A0A0D3CAN6, A0A178WAU5, R0I0Q4, E4MXN5, A0A078JR63, R0HHY6, A0A078IKL8, R0HRD5, Q9S9N1, A0A0D3EAC9, M4F776, V4L1B6, V4NCN6, V4M9A1, B9DGT7, A0A087GZ16	978	0.998754	0.999995
GO:0032550	purine ribonucleoside binding	31	D7KNV0, O24335, A0A178VHR6, A0A078C054, D7LJI7, R0I6C7, R0G9G5, A0A078DGF1, A0A078DVT2, V4MRK7, D7KLH0, D7LFE3, E4MYB4, M4E415, Q9FJZ2, A0A0D3CAN6, A0A178WAU5, R0I0Q4, E4MXN5, A0A078JR63, R0HHY6, A0A078IKL8, R0HRD5, Q9S9N1, A0A0D3EAC9, M4F776, V4L1B6, V4NCN6, V4M9A1, B9DGT7, A0A087GZ16	978	0.998754	0.999995
GO:0032549	ribonucleoside binding	31	D7KNV0, O24335, A0A178VHR6, A0A078C054, D7LJI7, R0I6C7, R0G9G5, A0A078DGF1, A0A078DVT2, V4MRK7, D7KLH0, D7LFE3, E4MYB4, M4E415, Q9FJZ2, A0A0D3CAN6, A0A178WAU5, R0I0Q4, E4MXN5, A0A078JR63, R0HHY6, A0A078IKL8, R0HRD5, Q9S9N1, A0A0D3EAC9, M4F776, V4L1B6, V4NCN6, V4M9A1, B9DGT7, A0A087GZ16	980	0.998814	0.999995
GO:0001882	nucleoside binding	31	D7KNV0, O24335, A0A178VHR6, A0A078C054, D7LJI7, R0I6C7, R0G9G5, A0A078DGF1, A0A078DVT2, V4MRK7, D7KLH0, D7LFE3, E4MYB4, M4E415, Q9FJZ2, A0A0D3CAN6, A0A178WAU5, R0I0Q4, E4MXN5, A0A078JR63, R0HHY6, A0A078IKL8, R0HRD5, Q9S9N1, A0A0D3EAC9, M4F776, V4L1B6, V4NCN6, V4M9A1, B9DGT7, A0A087GZ16	980	0.998814	0.999995
GO:0043604	amide biosynthetic process	12	Q6DT66, D7LTD9, D7MNW6, A0A078DWY1, R0I6C7, A0A078D332, A0A078D9Z2, A9Q115, A0A087G6I6, A0A075M3M5, A0A0D3EAC9, A0A078G0J6	493	0.998844	0.999995
GO:0043043	peptide biosynthetic process	11	A0A087G6I6, A0A075M3M5, Q6DT66, D7LTD9, A0A0D3EAC9, A0A078G0J6, A0A078DWY1, R0I6C7, A0A078D332, A0A078D9Z2, A9Q115	465	0.998846	0.999995
GO:0044271	cellular nitrogen compound biosynthetic process	27	Q6DT66, D7LTD9, A0A178VMR4, A0A078FM14, R0I6C7, V4JR39, A0A0D3BFD9, A9Q115, D7KLH0, M4CP65, V4MK94, A0A078G0J6, D7LYF5, A0A178W7K7, V4L870, D7MNW6, A0A0D3CQN5, A0A078DWY1, A0A078D332, A0A078D9Z2, A0A087G6I6, A0A075M3M5, A0A0D3EAC9, V4L1B6, R0FDJ8, A0A178WJZ1, V4LP72	884	0.998874	0.999995
GO:0003676	nucleic acid binding	18	A0A087GU96, A0A087GEH8, Q6DT66, D7LTD9, V4MXR1, A0A178VP87, A0A078DWY1, A0A078D332, A0A087G6I6, A0A075M3M5, D7KQK4, M4CP65, A0A0D3D7X1, Q9FJZ2, V5UUE5, R0HVT6, B9DGT7, A0A078J7C1	656	0.998892	0.999995
GO:0017076	purine nucleotide binding	31	D7KNV0, O24335, A0A178VHR6, A0A078C054, D7LJI7, R0I6C7, R0G9G5, A0A078DGF1, A0A078DVT2, V4MRK7, D7KLH0, D7LFE3, E4MYB4, M4E415, Q9FJZ2, A0A0D3CAN6, A0A178WAU5, R0I0Q4, E4MXN5, A0A078JR63, R0HHY6, A0A078IKL8, R0HRD5, Q9S9N1, A0A0D3EAC9, M4F776, V4L1B6, V4NCN6, V4M9A1, B9DGT7, A0A087GZ16	984	0.998926	0.999995
GO:0043228	non-membrane-bounded organelle	14	O24335, V4MXR1, A0A178VMR4, A0A078DWY1, D7L694, A0A078D332, A0A178VTR1, A0A078D9Z2, A0A087GS72, A0A078DVT2, A0A075M3M5, A0A078G0J6, V4L0Y4, B9DGT7	551	0.998946	0.999995
GO:0043232	intracellular non-membrane-bounded organelle	14	O24335, V4MXR1, A0A178VMR4, A0A078DWY1, D7L694, A0A078D332, A0A178VTR1, A0A078D9Z2, A0A087GS72, A0A078DVT2, A0A075M3M5, A0A078G0J6, V4L0Y4, B9DGT7	551	0.998946	0.999995
GO:0031966	mitochondrial membrane	2	D7M8K0, A0A078HQA4	182	0.999098	0.999995
GO:0090407	organophosphate biosynthetic process	2	V4LP72, D7LFE3	182	0.999098	0.999995
GO:0071702	organic substance transport	9	D7M8K0, A0A078HQA4, R0HHY6, D7LZC0, A0A078BVL6, A0A078J003, A0A078CTT3, A0A078DVT2, D7LBB4	419	0.999225	0.999995
GO:0005737	cytoplasm	187	Q93ZN4, A0A078J089, D7KNV0, D7LF25, A0A087GEG9, A0A078CGS5, A0A178VHR6, Q9SIN5, V4P9U3, D7L598, A0A0D3B7Y7, V4KQ28, A0A078C054, A0A078J003, V4NYR7, A0A078I437, V4KUK0, A0A178VTR1, A9Q115, V4KJE9, D7KQK4, D7M3J2, R0GSV2, A0A078G0J6, A0A087G8N1, A0A078BVL6, E4MXN5, R0FCA2, R0FGI7, R0INE7, A0A087GEH8, A0A078D5C6, V4L870, D7MNW6, D7MV68, A0A178W0Q2, A0A078CTT3, Q8LCQ4, R0GFS8, D7M7I2, D7MUT9, M4F776,…	4299	0.999243	0.999995
GO:0043603	cellular amide metabolic process	15	Q6DT66, D7LTD9, D7LKW5, D7MNW6, A0A178VYZ1, A0A078DWY1, R0I6C7, R0ETD5, A0A078D332, A0A078D9Z2, A9Q115, A0A087G6I6, A0A075M3M5, A0A0D3EAC9, A0A078G0J6	591	0.99929	0.999995
GO:0006807	nitrogen compound metabolic process	62	A0A078J089, R0HNM9, A0A078CGS5, Q6DT66, A0A087GEG9, A0A078FM14, R0I6C7, V4JR39, M4DTX0, A9Q115, A0A078EGE6, D7KQK4, A0A078CAC6, M4CP65, A0A078G0J6, V4MK94, A0A178WAU5, V4LAE1, Q3ZVC8, V4L870, D7MNW6, D7MV68, A0A0D3CQN5, A0A078D332, A0A087GS72, A0A087HK48, A0A087H276, V4L1B6, R0FDJ8, V4LP72, M4DWQ5, A0A078CZL5, A0A087GZ16, A0A087G4X8, O24335, D7LTD9, D7LKW5, A0A178VMR4, A0A178VYZ1, R0ETD5, D7M346,…	1727	0.999348	0.999995
GO:0006796	phosphate-containing compound metabolic process	18	Q3ZVC8, A0A078J089, O64730, A0A078DDG3, A0A087GS72, M4EIL0, V4MRK7, A0A087HK48, D7M346, D7LFE3, R0HGQ5, V4L1B6, V4NCN6, R0I0Q4, V4LP72, V4LAE1, A0A178VCR4, A0A087GZ16	675	0.999363	0.999995
GO:0015031	protein transport	6	A0A078HQA4, D7LZC0, A0A078BVL6, A0A078J003, A0A078CTT3, A0A078DVT2	334	0.999406	0.999995
GO:0005515	protein binding	30	O24335, A0A087G4X8, D7LTD9, V4LR78, Q9SIL3, A0A178VMR4, R0G9G5, R0I6C7, V4JR39, A0A078DVT2, A0A078F7S0, A9Q115, D7M4F3, A0A178W7K7, Q9ZNZ7, E4MXN5, R0I205, V4L870, R0I5H3, R0HHY6, A0A178VP87, A0A178VRQ2, A0A178UV43, A0A087GKB9, V4L1B6, A0A078HQA4, V4LGL0, V4L0Y4, R0HVT6, B9DGT7	983	0.999408	0.999995
GO:0045184	establishment of protein localization	6	A0A078HQA4, D7LZC0, A0A078BVL6, A0A078J003, A0A078CTT3, A0A078DVT2	336	0.999451	0.999995
GO:0036094	small molecule binding	45	D7KNV0, O24335, R0F4J2, A0A178VHR6, A0A078DXE8, Q9SIN5, D7L694, A0A078C054, D7LJI7, V4JR39, V4NYR7, R0I6C7, R0G9G5, A0A078DGF1, V4KUK0, Q8LFU3, A0A078DVT2, V4MRK7, D7KLH0, D7LFE3, G4WXD8, E4MYB4, M4E415, Q9FJZ2, A0A0D3CAN6, A0A178WAU5, R0I0Q4, E4MXN5, A0A078IRE8, A0A078JR63, V4LNM2, R0HHY6, A0A078IKL8, R0HRD5, Q9S9N1, A0A0D3EAC9, M4F776, A0A078BU48, V4L1B6, V4NCN6, V4M9A1, A0A078CZL5, Q9LUF6, B9D…	1346	0.999457	0.999995
GO:0043234	protein complex	15	A0A175DDT6, R0HNM9, A0A078CTT3, D7KLH0, Q8LCQ4, A0A087HIW3, A0A087G6I6, A0A078G8S3, A0A087GI99, A0A0D3A7X4, A0A078HQA4, A4QJL4, D7LZC0, A0A078BVL6, B9DGT7	601	0.99948	0.999995
GO:1901363	heterocyclic compound binding	75	D7KNV0, Q6DT66, A0A178VHR6, A0A078DXE8, A0A078C054, V4JR39, V4NYR7, R0I6C7, R0G9G5, V4KUK0, Q8LFU3, V4MRK7, D7KQK4, M4CP65, V4L9M5, A0A0D3D7X1, Q9FJZ2, M4E415, A0A178WAU5, A0A0D3CAN6, V5UUE5, A0A078J7C1, E4MXN5, A0A078JR63, A0A087GEH8, D7MNW6, R0HHY6, A0A078IKL8, R0HRD5, A0A078D332, Q8LCQ4, R0GFS8, M4F776, A0A078BU48, V4L1B6, R0HVT6, A0A078CZL5, B9DGT7, A0A087GZ16, A0A175DDT6, O24335, D7LTD9, R0F…	2031	0.99953	0.999995
GO:0019866	organelle inner membrane	2	D7M8K0, A0A078HQA4	197	0.999558	0.999995
GO:0097159	organic cyclic compound binding	75	D7KNV0, Q6DT66, A0A178VHR6, A0A078DXE8, A0A078C054, V4JR39, V4NYR7, R0I6C7, R0G9G5, V4KUK0, Q8LFU3, V4MRK7, D7KQK4, M4CP65, V4L9M5, A0A0D3D7X1, Q9FJZ2, M4E415, A0A178WAU5, A0A0D3CAN6, V5UUE5, A0A078J7C1, E4MXN5, A0A078JR63, A0A087GEH8, D7MNW6, R0HHY6, A0A078IKL8, R0HRD5, A0A078D332, Q8LCQ4, R0GFS8, M4F776, A0A078BU48, V4L1B6, R0HVT6, A0A078CZL5, B9DGT7, A0A087GZ16, A0A175DDT6, O24335, D7LTD9, R0F…	2038	0.999595	0.999995
GO:0030529	intracellular ribonucleoprotein complex	8	A0A075M3M5, O24335, A0A078G0J6, V4MXR1, A0A078DWY1, A0A078D332, A0A078D9Z2, A0A078DVT2	407	0.999596	0.999995
GO:1990904	ribonucleoprotein complex	8	A0A075M3M5, O24335, A0A078G0J6, V4MXR1, A0A078DWY1, A0A078D332, A0A078D9Z2, A0A078DVT2	407	0.999596	0.999995
GO:0006518	peptide metabolic process	12	Q6DT66, D7LTD9, A0A078DWY1, R0I6C7, A0A078D332, R0ETD5, A0A078D9Z2, A9Q115, A0A087G6I6, A0A075M3M5, A0A0D3EAC9, A0A078G0J6	527	0.999621	0.999995
GO:0008104	protein localization	6	A0A078HQA4, D7LZC0, A0A078BVL6, A0A078J003, A0A078CTT3, A0A078DVT2	346	0.999629	0.999995
GO:1901265	nucleoside phosphate binding	42	D7KNV0, O24335, A0A178VHR6, R0F4J2, A0A078DXE8, A0A078C054, D7LJI7, D7L694, R0I6C7, R0G9G5, A0A078DGF1, V4JR39, V4NYR7, A0A078DVT2, V4MRK7, Q8LFU3, D7KLH0, D7LFE3, E4MYB4, M4E415, Q9FJZ2, A0A0D3CAN6, A0A178WAU5, R0I0Q4, E4MXN5, A0A078IRE8, A0A078JR63, V4LNM2, R0HHY6, A0A078IKL8, R0HRD5, Q9S9N1, A0A0D3EAC9, M4F776, A0A078BU48, V4L1B6, V4NCN6, V4M9A1, A0A078CZL5, Q9LUF6, B9DGT7, A0A087GZ16	1302	0.999715	0.999995
GO:0000166	nucleotide binding	42	D7KNV0, O24335, A0A178VHR6, R0F4J2, A0A078DXE8, A0A078C054, D7LJI7, D7L694, R0I6C7, R0G9G5, A0A078DGF1, V4JR39, V4NYR7, A0A078DVT2, V4MRK7, Q8LFU3, D7KLH0, D7LFE3, E4MYB4, M4E415, Q9FJZ2, A0A0D3CAN6, A0A178WAU5, R0I0Q4, E4MXN5, A0A078IRE8, A0A078JR63, V4LNM2, R0HHY6, A0A078IKL8, R0HRD5, Q9S9N1, A0A0D3EAC9, M4F776, A0A078BU48, V4L1B6, V4NCN6, V4M9A1, A0A078CZL5, B9DGT7, Q9LUF6, A0A087GZ16	1302	0.999715	0.999995
GO:0044237	cellular metabolic process	121	A0A078J089, D7LF25, A0A078CGS5, A0A087GEG9, V4P9U3, V4KUK0, M4DTX0, A9Q115, A0A078EGE6, D7KQK4, A0A078G0J6, V4MK94, A0A087GEX4, R0FCA2, R0FGI7, A0A087GEH8, V4L870, D7MNW6, A0A087GN96, D7MV68, U5IB74, A0A087H276, Q8LCQ4, R0GFS8, V4L1B6, R0FDJ8, A4QJL4, V4LP72, V4MBI2, A0A087GZ16, A0A175DDT6, A0A087G4X8, D7LKW5, V4JQT7, A0A178VMR4, A0A178VYZ1, D7LFE3, D7M346, G4WXD8, A0A0D3BFD9, A0A087GI99, A0A0D3A…	3036	0.99973	0.999995
GO:0044424	intracellular part	201	A0A087GEG9, A0A078CGS5, V4P9U3, D7L598, V4KQ28, A0A078C054, A0A078J003, A0A178VTR1, V4KUK0, A9Q115, V4KJE9, A0A087H5E9, A0A078G0J6, A0A087G8N1, R0FCA2, R0FGI7, A0A0D3B7A5, A0A087GEH8, D7MNW6, D7MV68, R0GFS8, D7M7I2, D7MUT9, V4L1B6, D7M8K0, A4QJL4, D7MDS7, V4KKY6, A0A087GZ16, A0A087G4X8, D7LKW5, A0A178VMR4, A0A178VYZ1, D7M346, D7M4F3, V4LMW1, A0A078IRE8, A0A087GU96, A0A078I000, A0A087GKF4, A0A178V…	4618	0.999774	0.999995
GO:0034641	cellular nitrogen compound metabolic process	45	A0A078J089, A0A087G4X8, R0HNM9, D7LTD9, Q6DT66, D7LKW5, A0A178VMR4, A0A178VYZ1, A0A078FM14, R0ETD5, V4JR39, R0I6C7, A0A0D3BFD9, D7KLH0, D7M346, A9Q115, D7KQK4, A0A078CAC6, M4CP65, A0A078G0J6, V4MK94, D7LYF5, A0A178W7K7, V4LAE1, A0A178VCR4, Q3ZVC8, A0A087GU96, V4L870, D7MNW6, V4MXR1, A0A0D3CQN5, A0A078DWY1, A0A078D332, A0A078D9Z2, A0A087GS72, A0A087HK48, A0A087G6I6, A0A087GKB9, A0A075M3M5, A0A0D3E…	1390	0.999813	0.999995
GO:0033036	macromolecule localization	7	A0A078HQA4, D7LZC0, A0A078BVL6, A0A078J003, A0A078CTT3, A0A078DVT2, D7LBB4	401	0.999846	0.999995
GO:0043229	intracellular organelle	167	Q93ZN4, A0A078J089, D7KNV0, D7LF25, A0A087GEG9, A0A178VHR6, Q9SIN5, V4P9U3, D7L598, A0A0D3B7Y7, V4KQ28, A0A078C054, A0A078J003, A0A178VTR1, A0A078I437, V4KUK0, A9Q115, A0A087H5E9, D7M3J2, R0GSV2, A0A078G0J6, A0A087G8N1, A0A078BVL6, R0FGI7, A0A0D3B7A5, A0A087GEH8, A0A078D5C6, V4L870, D7MNW6, D7MV68, A0A178W0Q2, A0A078CTT3, Q8LCQ4, R0GFS8, D7M7I2, D7MUT9, M4F776, V4L1B6, D7M8K0, R0FDJ8, A0A087HBX3,…	3986	0.99985	0.999995
GO:0043226	organelle	167	Q93ZN4, A0A078J089, D7KNV0, D7LF25, A0A087GEG9, A0A178VHR6, Q9SIN5, V4P9U3, D7L598, A0A0D3B7Y7, V4KQ28, A0A078C054, A0A078J003, A0A178VTR1, A0A078I437, V4KUK0, A9Q115, A0A087H5E9, D7M3J2, R0GSV2, A0A078G0J6, A0A087G8N1, A0A078BVL6, R0FGI7, A0A0D3B7A5, A0A087GEH8, A0A078D5C6, V4L870, D7MNW6, D7MV68, A0A178W0Q2, A0A078CTT3, Q8LCQ4, R0GFS8, D7M7I2, D7MUT9, M4F776, V4L1B6, D7M8K0, R0FDJ8, A0A087HBX3,…	3986	0.99985	0.999995
GO:0006139	nucleobase-containing compound metabolic process	20	Q3ZVC8, A0A087GU96, A0A078J089, R0HNM9, D7LTD9, A0A178VMR4, V4MXR1, A0A0D3CQN5, V4JR39, A0A087GS72, A0A087HK48, D7M346, D7KQK4, A0A078CAC6, M4CP65, A0A0D3EAC9, V4MK94, A0A178W7K7, V4LAE1, A0A178VCR4	780	0.999867	0.999995
GO:0044260	cellular macromolecule metabolic process	43	A0A178V6J6, A0A087G4X8, R0HNM9, D7LTD9, Q6DT66, O64730, V4P9U3, V4JQT7, A0A178VMR4, A0A078HL16, R0I6C7, V4JR39, D7KLH0, A9Q115, V4L5K5, M4CP65, A0A078G0J6, V4MK94, A0A078H9S8, R0I0Q4, A0A178W7K7, A0A087GEX4, R0FCA2, A0A087GU96, D7MV45, V4MXR1, A0A0D3CQN5, A0A078DWY1, A0A078D332, A0A078D9Z2, A0A178URS6, A0A087G6I6, Q8LCQ4, A0A087HN90, R0GFS8, A0A075M3M5, A0A0D3EAC9, V4L1B6, R0EVU0, V4NCN6, R0HVT6,…	1357	0.99987	0.999995
GO:0009987	cellular process	156	A0A078J089, D7LF25, A0A078CGS5, A0A087GEG9, V4P9U3, D7L598, A0A078C054, A0A078J003, V4KUK0, A0A078I437, M4DTX0, A9Q115, A0A078EGE6, D7KQK4, A0A078G0J6, V4MK94, A0A087GEX4, E4MXN5, R0FCA2, R0FGI7, A0A087GEH8, V4L870, D7MNW6, A0A087GN96, D7MV68, U5IB74, A0A087H276, Q8LCQ4, R0GFS8, M4F776, V4L1B6, D7M8K0, A0A087HBX3, R0FDJ8, A4QJL4, V4LP72, V4MBI2, B9DGT7, A0A087GZ16, A0A175DDT6, A0A087G4X8, D7LKW5,…	3779	0.999877	0.999995
GO:0005622	intracellular	202	A0A087GEG9, A0A078CGS5, V4P9U3, D7L598, V4KQ28, A0A078C054, A0A078J003, A0A178VTR1, V4KUK0, A9Q115, V4KJE9, A0A087H5E9, A0A078G0J6, A0A087G8N1, R0FCA2, R0FGI7, A0A0D3B7A5, A0A087GEH8, D7MNW6, D7MV68, R0GFS8, D7M7I2, D7MUT9, V4L1B6, D7M8K0, A4QJL4, D7MDS7, V4KKY6, A0A087GZ16, A0A087G4X8, D7LKW5, A0A178VMR4, A0A178VYZ1, D7M346, D7M4F3, V4LMW1, A0A078IRE8, A0A087GU96, A0A078I000, A0A087GKF4, A0A178V…	4672	0.999907	0.999995
GO:0044267	cellular protein metabolic process	27	A0A087G4X8, Q6DT66, D7LTD9, O64730, V4P9U3, A0A178VMR4, R0I6C7, A9Q115, V4L5K5, A0A078G0J6, R0I0Q4, R0FCA2, D7MV45, A0A0D3CQN5, A0A078DWY1, A0A078D332, A0A078D9Z2, A0A087HN90, A0A087G6I6, Q8LCQ4, R0GFS8, A0A075M3M5, A0A0D3EAC9, V4L1B6, V4NCN6, A0A178UA59, V4NDH1	976	0.99991	0.999995
GO:0044444	cytoplasmic part	162	Q93ZN4, A0A078J089, D7KNV0, D7LF25, A0A087GEG9, A0A078CGS5, A0A178VHR6, Q9SIN5, V4P9U3, D7L598, A0A0D3B7Y7, V4KQ28, A0A078C054, A0A078J003, A0A078I437, V4KUK0, A9Q115, V4KJE9, D7M3J2, R0GSV2, A0A078G0J6, A0A087G8N1, A0A078BVL6, E4MXN5, R0FGI7, R0INE7, A0A087GEH8, A0A078D5C6, V4L870, D7MNW6, D7MV68, A0A178W0Q2, A0A078CTT3, Q8LCQ4, R0GFS8, D7M7I2, D7MUT9, M4F776, D7M8K0, R0FDJ8, A0A087HBX3, A4QJL4,…	3939	0.999954	0.999995
GO:0005488	binding	133	D7KNV0, A0A087GEG9, D7LF25, A0A178VHR6, Q9SIN5, D7L598, A0A078C054, V4NYR7, V4KUK0, A9Q115, A0A078F7S0, A0A078EGE6, D7KQK4, A0A078BVL6, E4MXN5, R0FGI7, A0A087GEH8, V4L870, D7MNW6, D7MV68, U5IB74, A0A087H276, D7LBB4, Q8LCQ4, R0GFS8, M4F776, V4L1B6, R0FDJ8, V4LP72, V4L0Y4, B9DGT7, A0A087GZ16, A0A175DDT6, A0A087G4X8, V4LR78, V4KN29, A0A178VMR4, A0A078DGF1, A0A078DVT2, A0A0D3BFD9, G4WXD8, D7LFE3, E4M…	3379	0.99997	0.999995
GO:0032991	macromolecular complex	28	A0A175DDT6, O24335, R0HNM9, V4KUK0, A0A078DVT2, G4WXD8, D7KLH0, A0A087HIW3, A0A087GI99, A0A078G0J6, A0A078BVL6, R0IG50, V4MXR1, A0A078DWY1, A0A078D332, A0A078D9Z2, A0A078CTT3, Q8LCQ4, A0A087G6I6, A0A075M3M5, A0A078G8S3, A0A0D3A7X4, A0A078HQA4, R0FDJ8, A4QJL4, A0A178WJZ1, D7LZC0, B9DGT7	1098	0.999995	0.999995

## Sheet: L3-L1
GO_ID	Term	DPs number	DPs	Annotated proteins	P value	FDR
GO:0009408	response to heat	43	D7KG37, D7MM37, V4LR78, A0A068CIP5, B0ZX82, E4MX40, A0A0D3B7Y7, V4KQ28, A0A078C054, R0I6C7, A0A078HNN8, A0A078I437, Q8H6F3, A0A078DVT2, A0A078GNK2, E4MYB4, D7M4F3, V4MA11, A0A078C438, A0A078DQF1, V4LAQ5, M4E415, V4LMW1, E4MXN5, R0I205, A0A078DCM0, A0A087GW30, M4CB77, A0A178VNU6, V4KMF0, R0HRD5, D7KLE0, A0A087G5W0, V4NCV6, D7KIH9, A0A078GRJ1, Q9S9N1, A0A087GD00, O22809, D7MIF8, A0A087HLV2, R0GP63,…	132	6.21551e-11	1.75837e-07
GO:0006950	response to stress	162	D7LF25, A0A0D3B7Y7, V4KQ28, A0A078C054, A0A087GLU5, R0HB18, V4NYR7, A0A078I437, V4MSQ9, A9Q115, V4KJE9, A0A087HPB5, R0GPX2, D7MCA9, D7MPK7, V4LAQ5, D7LAQ2, E4MXN5, R0FGI7, A0A087GW30, R0INE7, D7LZA7, D7L0W7, A0A078I2G0, F4K0E8, M4F776, R0FFN4, V4L1B6, R0GP63, R0FDJ8, V4KKY6, B9DGT7, A0A087GZ16, V4LR78, A0A068CIP5, A0A078CXB7, Q8H6J9, A0A078DVT2, A0A078GNK2, D7M9P5, A0A078CT22, E4MYB4, D7M4F3, A0A…	1018	2.14009e-06	0.00231099
GO:0009628	response to abiotic stimulus	119	Q8L847, A0A0D3B7Y7, V4KQ28, A0A078C054, R0HB18, A0A078I437, A9Q115, V4KJE9, R0GPX2, D7MCA9, V4LAQ5, R0G1S4, E4MXN5, R0FGI7, A0A087GW30, R0INE7, Q09GN7, D7LZA7, D7L0W7, E4MVR1, R0GM91, Q8LCQ4, R0FFN4, V4L1B6, R0GP63, A0A087H3J5, A0A087GAY4, V4KKY6, B9DGT7, A0A087GZ16, P00294, V4LR78, A0A087HBY0, A0A068CIP5, A0A078CXB7, M4CFM2, A0A078DVT2, A0A078GNK2, D7M9P5, A0A078CT22, E4MYB4, D7M4F3, A0A087GIZ8,…	699	2.45068e-06	0.00231099
GO:0016798	hydrolase activity, acting on glycosyl bonds	43	M4C903, D7M4B8, D7M2Y3, V4JQT7, R0GD66, V4KIC1, A0A087H361, M4CF23, D7L7Z4, A0A078FY74, A0A087GIK0, A0A078HPN4, O82772, V4N7G3, V4LAQ5, A0A078H9S8, D7MPK7, A0A087GYK9, V4MAN4, A0A0D3ACP6, D7M4H7, C3S7U7, A0A087G5Q3, V4LKQ8, A0A078HWY0, A0A078FK28, A0A078JUU3, D7M9X2, V4LX24, A0A178URS6, V4LQK9, A0A078I2G0, A0A078GY33, A0A078D876, R0GXB3, A0A087G8C1, D7L6J2, A0A078JFX0, R0EVU0, A0A087GYR5, D7LYI5,…	187	4.62666e-06	0.00327221
GO:0009266	response to temperature stimulus	54	D7KG37, B0ZX82, A0A0D3B7Y7, V4KQ28, A0A078C054, R0I6C7, A0A078HNN8, A0A078I437, D7LHB8, V4MA11, V4LAQ5, M4E415, A0A087G8R5, E4MXN5, R0FGI7, A0A087GW30, A0A078H0Z9, R0HRD5, D7KLE0, A0A078F758, O22809, R0GP63, V4L1B6, V4KKY6, D7MM37, V4LR78, D7LJQ1, A0A068CIP5, E4MX40, Q8H6F3, A0A078DVT2, A0A078GNK2, D7M9P5, E4MYB4, D7M4F3, A0A078C438, A0A078DQF1, V4LMW1, R0I205, A0A078DCM0, M4CB77, A0A178VNU6, V4K…	262	9.7177e-06	0.00460741
GO:0008194	UDP-glycosyltransferase activity	23	A0A178UZN6, A0A078GAK2, A0A087HBY0, D7L0W7, A0A087HLD0, A0A078DNP2, R0HNB6, A0A078CJJ1, A0A0D3DYT6, Q9LFJ9, A0A178UMQ8, D7KID6, A0A087GIZ8, V4KQF7, W8Q789, A0A078JZK8, M4CNQ7, Q0GPY3, R0FMI3, R0HVT6, A0A087HLA4, D7MVE3, V4LDL5	77	9.77182e-06	0.00460741
GO:0004553	hydrolase activity, hydrolyzing O-glycosyl compounds	40	M4C903, D7M4B8, D7M2Y3, V4JQT7, R0GD66, V4KIC1, M4CF23, A0A087H361, D7L7Z4, A0A087GIK0, A0A078FY74, A0A078HPN4, O82772, V4N7G3, A0A078H9S8, D7MPK7, V4LAQ5, V4MAN4, A0A0D3ACP6, D7M4H7, C3S7U7, A0A087G5Q3, V4LKQ8, A0A078HWY0, A0A078FK28, A0A078JUU3, D7M9X2, V4LX24, A0A178URS6, V4LQK9, A0A078I2G0, A0A078GY33, A0A078D876, R0GXB3, D7L6J2, A0A078JFX0, R0EVU0, A0A087GYR5, A0A0D3DPA9, A0A0D3E0X4	176	1.34081e-05	0.00504626
GO:0016630	protochlorophyllide reductase activity	5	A0A078IPM7, A0A078DKU7, A0A087GAY4, M4CFM2, R0GM91	5	1.9753e-05	0.00504626
GO:0016724	oxidoreductase activity, oxidizing metal ions, oxygen as acceptor	5	A0A087FY81, V4KQ77, D7LF25, A0A078FPP2, R0FGI7	5	1.9753e-05	0.00504626
GO:0008199	ferric iron binding	5	A0A087FY81, V4KQ77, D7LF25, A0A078FPP2, R0FGI7	5	1.9753e-05	0.00504626
GO:0004322	ferroxidase activity	5	A0A087FY81, V4KQ77, D7LF25, A0A078FPP2, R0FGI7	5	1.9753e-05	0.00504626
GO:0000302	response to reactive oxygen species	24	A0A087FY81, V4LR78, D7LF25, A0A078DXE8, M4CB77, A0A078FPP2, R0I6C7, A0A078HNN8, D7KLE0, Q8H6F3, A0A078GNK2, A9Q115, V4MLG8, A0A178URS6, O78310, A0A087HPB5, D7M4F3, D7MIF8, A0A087HLV2, A0A0D3AEV6, V4NC17, D7L3B5, A0A087HLA4, R0FGI7	86	2.24722e-05	0.00504626
GO:0009611	response to wounding	19	R0I4D1, B0ZX82, D7M6N1, V4NYR7, V4L4Q7, A0A087H5Y3, R0GPX2, A0A087HPB5, V4KD85, R0HP78, A0A087G8C1, A0A078BX32, V4L1B6, A0A078HQA4, R0FDJ8, A0A087HAZ7, C3S7U7, A0A078IRE8, R0GZW2	60	2.31889e-05	0.00504626
GO:0016758	transferase activity, transferring hexosyl groups	30	A0A178UZN6, A0A078GAK2, A0A087HBY0, A0A087HLD0, A0A087H361, A0A078DNP2, A0A0D3DYT6, Q9LFJ9, A0A178UMQ8, A0A087GIZ8, M4CM04, A0A078D6M3, V4KVI9, M4CNQ7, A0A0D3B5A4, Q0GPY3, R0FMI3, D7MVE3, D7LZA7, D7L0W7, R0HNB6, A0A078CJJ1, D7KID6, R0GXB3, V4KQF7, W8Q789, A0A078JZK8, R0HVT6, A0A087HLA4, V4LDL5	123	3.97178e-05	0.00796329
GO:0015995	chlorophyll biosynthetic process	14	V4L870, A0A0D3DFZ4, A0A078EKR3, V4NHK7, A0A078DKU7, V4JR39, M4CFM2, D7KLH0, R0GM91, A0A087GF69, Q9M591, D7LYF5, A0A087GAY4, V4LP72	38	4.22232e-05	0.00796329
GO:0006879	cellular iron ion homeostasis	6	A0A087FY81, R0EVP1, D7LF25, V4KQ77, A0A078FPP2, R0FGI7	8	5.14187e-05	0.00909147
GO:0010039	response to iron ion	9	A0A087FY81, O78310, R0EVP1, D7LF25, B0ZX82, A0A078FPP2, A0A178URS6, R0FGI7, A9Q115	18	6.16364e-05	0.00983975
GO:0006779	porphyrin-containing compound biosynthetic process	15	V4L870, A0A0D3DFZ4, A0A078EKR3, V4NHK7, A0A078DKU7, V4JR39, M4CFM2, D7KLH0, R0GM91, A0A087GF69, M4F785, Q9M591, D7LYF5, A0A087GAY4, V4LP72	44	6.45017e-05	0.00983975
GO:0015994	chlorophyll metabolic process	18	A0A087G4X8, V4L870, A0A0D3DFZ4, A0A078EKR3, V4NHK7, A0A078DKU7, A0A078E894, V4JR39, M4CFM2, D7KLH0, R0GM91, D7M9P5, A0A087GKB9, A0A087GF69, Q9M591, D7LYF5, A0A087GAY4, V4LP72	59	6.60853e-05	0.00983975
GO:0035251	UDP-glucosyltransferase activity	19	A0A178UZN6, A0A078GAK2, A0A087HBY0, D7L0W7, A0A087HLD0, A0A078DNP2, A0A0D3DYT6, Q9LFJ9, D7KID6, A0A087GIZ8, V4KQF7, W8Q789, A0A078JZK8, M4CNQ7, Q0GPY3, R0HVT6, A0A087HLA4, D7MVE3, V4LDL5	66	0.000100489	0.0135372
GO:0006778	porphyrin-containing compound metabolic process	19	A0A087G4X8, V4L870, A0A0D3DFZ4, A0A078EKR3, V4NHK7, A0A078DKU7, A0A078E894, V4JR39, M4CFM2, D7KLH0, R0GM91, D7M9P5, A0A087GKB9, A0A087GF69, M4F785, Q9M591, D7LYF5, A0A087GAY4, V4LP72	66	0.000100489	0.0135372
GO:0006826	iron ion transport	5	A0A087FY81, V4KQ77, D7LF25, A0A078FPP2, R0FGI7	6	0.000107242	0.0137903
GO:0046527	glucosyltransferase activity	19	A0A178UZN6, A0A078GAK2, A0A087HBY0, D7L0W7, A0A087HLD0, A0A078DNP2, A0A0D3DYT6, Q9LFJ9, D7KID6, A0A087GIZ8, V4KQF7, W8Q789, A0A078JZK8, M4CNQ7, Q0GPY3, R0HVT6, A0A087HLA4, D7MVE3, V4LDL5	67	0.000125481	0.0154342
GO:0016757	transferase activity, transferring glycosyl groups	35	A0A178UZN6, A0A078GAK2, A0A087HBY0, A0A087HLD0, A0A078DNP2, A0A087H361, A0A0D3DYT6, Q9LFJ9, A0A178UMQ8, A0A087H2E6, A0A087GIZ8, M4CM04, A0A078D6M3, A0A087G8R5, V4KVI9, M4CNQ7, A0A0D3B5A4, Q0GPY3, R0FMI3, D7MVE3, D7MH74, D7LZA7, D7L0W7, A0A087GJJ7, R0HNB6, A0A078CJJ1, D7KID6, R0GXB3, V4KQF7, W8Q789, A0A078JZK8, R0HVT6, A0A087HLA4, V4LDL5, V4MEI2	162	0.00013774	0.0162361
GO:0016628	oxidoreductase activity, acting on the CH-CH group of donors, NAD or NADP as acceptor	11	D7LA42, A0A078IPM7, A0A087GZ98, A0A078DXE8, A0A078EVL1, A0A078DKU7, D7LYF5, A0A087GAY4, V4JR39, M4CFM2, R0GM91	28	0.000144615	0.0163232
GO:0033014	tetrapyrrole biosynthetic process	15	V4L870, A0A0D3DFZ4, A0A078EKR3, V4NHK7, A0A078DKU7, V4JR39, M4CFM2, D7KLH0, R0GM91, A0A087GF69, M4F785, Q9M591, D7LYF5, A0A087GAY4, V4LP72	47	0.000151468	0.0163232
GO:0033013	tetrapyrrole metabolic process	19	A0A087G4X8, V4L870, A0A0D3DFZ4, A0A078EKR3, V4NHK7, A0A078DKU7, A0A078E894, V4JR39, M4CFM2, D7KLH0, R0GM91, D7M9P5, A0A087GKB9, A0A087GF69, M4F785, Q9M591, D7LYF5, A0A087GAY4, V4LP72	68	0.000155789	0.0163232
GO:0031984	organelle subcompartment	91	A0A087GEG9, D7MSA9, D7KS71, V4LNN4, R0FME5, V4JR39, V4P6G2, A0A078F1W9, A0A078CQS6, R0GPX2, R0IMT8, R0GXG8, A0A078IAV5, D7M3J2, V4K8F1, A0A178UZD4, V4M240, R0FWY6, R0FGI7, A0A087GW30, V4L9A6, V4L870, A0A078CM95, E4MVR1, A0A178W0Q2, A0A087HL65, V4MDD9, R0GM91, Q8LCQ4, D7L7P4, R0GFS8, M4E7B9, V4NCP4, Q8H118, D7M1Z0, Q93ZQ0, A0A178VQH8, A0A087GAY4, R0GQQ8, R0HVT6, B6EUA5, A0A175DDT6, P00294, A0A087G…	555	0.000182677	0.0177954
GO:0071554	cell wall organization or biogenesis	29	R0GVN4, D7LUW2, B0ZX82, A0A087H361, M4CF23, R0GTD1, D7LA42, A0A087GIZ8, V4LAQ5, M4CNQ7, D7KVC4, Q0GPY3, R0FMI3, C3S7U7, V4LT85, A0A087G5Q3, A0A078GRZ7, R0HNB6, A0A078CJJ1, V4LX24, A0A078I2G0, A0A078GY33, R0GXB3, A0A078JFX0, A0A078JZ04, R0EVU0, A0A078I3C9, R0HVT6, Q93VW5	127	0.000187085	0.0177954
GO:0009642	response to light intensity	21	A0A087GW30, Q09GN7, V4LR78, Q8L847, M4CB77, R0I6C7, A0A078HNN8, D7KLE0, A0A078I437, M4CFM2, A0A078GNK2, R0GM91, A9Q115, D7M9P5, O78310, D7M4F3, R0FFN4, Q39096, A0A087GAY4, D8L1V9, A0A0D3E1R0	80	0.000188711	0.0177954
GO:0008168	methyltransferase activity	20	A0A178V0E9, D7KN61, A0A087HPU9, A0A0D3DFZ4, V4L2K1, V4MLJ7, A0A078CBH7, V4LGD7, A0A0D3BKF7, A0A078F7S0, Q9FFE0, A0A078D820, V4L9K1, R0IMT8, R0GXG8, M4DGN9, V4K8F1, Q8H118, A0A078II86, Q2PQS3	75	0.000211896	0.0191133
GO:0071555	cell wall organization	24	R0GVN4, V4LT85, D7LUW2, A0A078GRZ7, A0A087G5Q3, B0ZX82, M4CF23, A0A087H361, R0GTD1, R0HNB6, A0A078CJJ1, V4LX24, R0GXB3, A0A087GIZ8, V4LAQ5, A0A078JZ04, A0A078JFX0, M4CNQ7, A0A078I3C9, D7KVC4, Q0GPY3, Q93VW5, R0HVT6, R0FMI3	98	0.000216198	0.0191133
GO:0005802	trans-Golgi network	20	A0A178V0E9, A0A087GEG9, V4M069, D7KS71, R0HNB6, A0A078CJJ1, R0I0Y7, R0IMT8, M4E7B9, R0GXG8, A0A087GIZ8, D7M3J2, A0A0D3E2R7, V4K8F1, Q8H118, A0A0D3CVE8, A0A178UZD4, A0A178VKB9, R0GQQ8, R0HVT6	77	0.000310876	0.0266506
GO:0009644	response to high light intensity	15	A0A087GW30, Q09GN7, V4LR78, M4CB77, R0I6C7, A0A078HNN8, D7KLE0, A0A078I437, A0A078GNK2, D7M9P5, O78310, D7M4F3, Q39096, D8L1V9, A0A0D3E1R0	50	0.000326016	0.0266976
GO:0042973	glucan endo-1,3-beta-D-glucosidase activity	5	D7MPK7, A0A078FK28, M4CF23, A0A087GIK0, D7M9X2	7	0.000339736	0.0266976
GO:0051238	sequestering of metal ion	5	A0A087FY81, D7LF25, A0A078FPP2, R0HB18, R0FGI7	7	0.000339736	0.0266976
GO:0045229	external encapsulating structure organization	24	R0GVN4, D7LUW2, B0ZX82, M4CF23, A0A087H361, R0GTD1, A0A087GIZ8, V4LAQ5, M4CNQ7, D7KVC4, Q0GPY3, R0FMI3, V4LT85, A0A087G5Q3, A0A078GRZ7, R0HNB6, A0A078CJJ1, V4LX24, R0GXB3, A0A078JFX0, A0A078JZ04, A0A078I3C9, R0HVT6, Q93VW5	101	0.000351907	0.0269066
GO:0032259	methylation	20	A0A178V0E9, D7KN61, A0A0D3DFZ4, A0A087HPU9, V4L2K1, V4MLJ7, A0A078CBH7, V4LGD7, A0A0D3BKF7, A0A078F7S0, Q9FFE0, A0A078D820, V4L9K1, R0IMT8, R0GXG8, M4DGN9, V4K8F1, Q8H118, A0A078II86, Q2PQS3	78	0.00037402	0.0278448
GO:0015926	glucosidase activity	11	M4C903, O82772, D7MPK7, R0GD66, A0A078FK28, M4CF23, D7L7Z4, A0A0D3ACP6, A0A087GIK0, D7M9X2, A0A178URS6	31	0.000412326	0.0299095
GO:0006979	response to oxidative stress	43	D7KVA3, V4LR78, D7LF25, A0A078DXE8, A0A078FPP2, V4LX97, R0GTD1, R0I6C7, A0A078HNN8, A0A078I437, Q8H6F3, V4MSQ9, A0A078GNK2, D7LAE7, A9Q115, V4MLG8, D7M9P5, A0A078CT22, A0A087HPB5, O78310, D7L8U7, D7M4F3, A0A078EJG4, A0A087G8R5, A0A0D3AEV6, V4KC14, R0FGI7, R0I205, A0A087FY81, A0A087GW30, K7ZW05, A0A078CM95, M4CB77, D7MV45, D7KLE0, A0A178URS6, D7MIF8, A0A087HLV2, V4L1B6, V4NC17, V4LZG5, D7L3B5, A0A…	227	0.000556094	0.0393298
GO:0009739	response to gibberellin	6	V4LNV9, R0GXB3, B0ZX82, A0A087HIQ4, V4KCR9, D7LBP2	11	0.000624468	0.0420624
GO:0055072	iron ion homeostasis	6	A0A087FY81, R0EVP1, D7LF25, V4KQ77, A0A078FPP2, R0FGI7	11	0.000624468	0.0420624
GO:0005618	cell wall	70	V4LED1, V4LX97, V4KIC1, R0I9M8, M4CF23, R0GTD1, D7L7Z4, R0G9G5, A0A087GIK0, A0A087GP42, D7M3J2, V4LAQ5, A0A178WBW6, A0A0D3ACP6, D7M4H7, E4MXN5, A0A078CI95, A0A087G5Q3, V4LKQ8, R0HB45, A0A087HIQ4, A0A078JUU3, V4LX24, A0A087GS72, R0GXB3, A0A087G8C1, D7L6J2, A0A087GF69, R0EVU0, A0A078JZK8, A0A078D3D0, B9DGT7, R0GVN4, D7M4B8, A0A068CIP5, A0A087H361, V4LVP2, Q8H6F3, D7M1H6, V4L5K5, E4MYB4, A0A078G2D0,…	420	0.000659675	0.0424141
GO:0030312	external encapsulating structure	70	V4LED1, V4LX97, V4KIC1, R0I9M8, M4CF23, R0GTD1, D7L7Z4, R0G9G5, A0A087GIK0, A0A087GP42, D7M3J2, V4LAQ5, A0A178WBW6, A0A0D3ACP6, D7M4H7, E4MXN5, A0A078CI95, A0A087G5Q3, V4LKQ8, R0HB45, A0A087HIQ4, A0A078JUU3, V4LX24, A0A087GS72, R0GXB3, A0A087G8C1, D7L6J2, A0A087GF69, R0EVU0, A0A078JZK8, A0A078D3D0, B9DGT7, R0GVN4, D7M4B8, A0A068CIP5, A0A087H361, V4LVP2, Q8H6F3, D7M1H6, V4L5K5, E4MYB4, A0A078G2D0,…	420	0.000659675	0.0424141
GO:0042542	response to hydrogen peroxide	10	A0A087HPB5, D7M4F3, V4LR78, M4CB77, R0I6C7, A0A078HNN8, D7KLE0, A0A087HLA4, A0A078GNK2, R0FGI7	28	0.000711249	0.0447138
GO:0009073	aromatic amino acid family biosynthetic process	12	D7LUW2, A0A087GEG9, A0A078BX32, A0A0D3E2R7, D7MNW6, R0FDJ8, A0A178WJZ1, A0A078FM14, Q8W1M5, Q93VW5, A0A178VZJ5, A0A0D3D1J6	38	0.000766427	0.046265
GO:0006880	intracellular sequestering of iron ion	4	A0A087FY81, D7LF25, A0A078FPP2, R0FGI7	5	0.000784983	0.046265
GO:0097577	sequestering of iron ion	4	A0A087FY81, D7LF25, A0A078FPP2, R0FGI7	5	0.000784983	0.046265
GO:0044421	extracellular region part	9	A0A078I2G0, D7M2Y3, E4MWB2, R0EVU0, E4MW96, A0A178WBW6, R0HAU6, D7MQ24, D7M9X2	24	0.000875377	0.050129
GO:0046148	pigment biosynthetic process	20	V4L870, A0A0D3DFZ4, A0A078EKR3, A0A087HBY0, V4NHK7, A0A087HLD0, A0A078DKU7, V4JR39, A0A0D3DYT6, M4CFM2, D7KLH0, R0GM91, A0A087GF69, M4F785, Q9M591, D7LYF5, A0A087GAY4, D7KVC4, V4LP72, V4MEI2	83	0.000885984	0.050129
GO:0042440	pigment metabolic process	23	A0A087G4X8, V4L870, A0A0D3DFZ4, A0A078EKR3, A0A087HBY0, V4NHK7, A0A087HLD0, A0A078DKU7, A0A078E894, V4JR39, A0A0D3DYT6, M4CFM2, D7KLH0, R0GM91, A0A087GKB9, A0A087GF69, M4F785, Q9M591, D7LYF5, A0A087GAY4, D7KVC4, V4LP72, V4MEI2	102	0.00101417	0.0562566
GO:0050896	response to stimulus	228	Q8L847, D7L598, V4KQ28, A0A087GLU5, A0A078C054, V4MSQ9, A9Q115, V4KJE9, R0GPX2, D7MCA9, D7MPK7, V4LAQ5, D7LAQ2, R0FGI7, D7LZA7, M4D1I9, E4MVR1, D7MV68, A0A078I2G0, F4K0E8, R0I0R2, V4L1B6, R0GP63, V4KKY6, A0A087GZ16, A0A068CIP5, A0A078CXB7, A0A178VMR4, Q8H6J9, D7M9P5, D7M4F3, Q39096, V4LMW1, R0F3T4, A0A087GZ28, A0A078IRE8, A0A078FYL7, K7ZW05, A0A078DKU7, A0A178VP87, A0A178VNU6, A0A078GRJ1, F4K2G3,…	1677	0.00111105	0.0602208
GO:0016722	oxidoreductase activity, oxidizing metal ions	6	A0A087FY81, V4KQ77, D7LF25, Q8L847, A0A078FPP2, R0FGI7	12	0.00112821	0.0602208
GO:0055076	transition metal ion homeostasis	9	A0A087FY81, R0EVP1, P00294, D7LF25, V4KQ77, A0A078FPP2, R0HB18, A0A178VRQ2, R0FGI7	25	0.00123034	0.0636942
GO:0009416	response to light stimulus	42	P00294, V4LR78, Q8L847, O64730, V4LKH6, R0I6C7, A0A078HNN8, A0A078I437, A0A078GNK2, M4CFM2, D7KLH0, A9Q115, D7M9P5, O78310, R0GPX2, D7LA42, D7M4F3, Q39096, A0A126X281, A0A087GW30, V4MEL6, Q09GN7, R0I4D1, M4CB77, E4MVR1, D7KLE0, A0A0A0N2Z4, R0GM91, Q8LCQ4, D7L7P4, V4NCV6, A0A078F758, Q570B4, R0FFN4, V4L1B6, A0A087HAZ7, A0A087H3J5, A0A087GAY4, V4NC17, D8L1V9, A0A0D3E1R0, Q93VW5	229	0.00126082	0.0636942
GO:0009314	response to radiation	42	P00294, V4LR78, Q8L847, O64730, V4LKH6, R0I6C7, A0A078HNN8, A0A078I437, A0A078GNK2, M4CFM2, D7KLH0, A9Q115, D7M9P5, R0GPX2, D7LA42, O78310, D7M4F3, Q39096, A0A126X281, A0A087GW30, V4MEL6, Q09GN7, R0I4D1, M4CB77, E4MVR1, D7KLE0, A0A0A0N2Z4, R0GM91, Q8LCQ4, V4NCV6, A0A078F758, D7L7P4, Q570B4, R0FFN4, V4L1B6, A0A087HAZ7, A0A087H3J5, A0A087GAY4, V4NC17, D8L1V9, A0A0D3E1R0, Q93VW5	229	0.00126082	0.0636942
GO:0046916	cellular transition metal ion homeostasis	8	A0A087FY81, R0EVP1, D7LF25, V4KQ77, A0A078FPP2, R0HB18, A0A178VRQ2, R0FGI7	21	0.00150883	0.0736438
GO:0047262	polygalacturonate 4-alpha-galacturonosyltransferase activity	3	R0HNB6, A0A078CJJ1, R0FMI3	3	0.00150984	0.0736438
GO:0004084	branched-chain-amino-acid transaminase activity	5	R0I4D1, A0A078GH59, D7MNW6, A0A087HAZ7, M4DTX0	9	0.00167154	0.074831
GO:0006694	steroid biosynthetic process	5	D7LA42, A0A087HPU9, A0A078EVL1, M4ES88, A0A178V9E4	9	0.00167154	0.074831
GO:0016144	S-glycoside biosynthetic process	9	V5Q698, D7LJX7, V4KD85, R0I4D1, A0A087HAZ7, D7MV68, A0A087GZ28, Q93VW5, A0A0A0N2Z4	26	0.00169289	0.074831
GO:0019758	glycosinolate biosynthetic process	9	V5Q698, D7LJX7, V4KD85, R0I4D1, A0A087HAZ7, D7MV68, A0A087GZ28, Q93VW5, A0A0A0N2Z4	26	0.00169289	0.074831
GO:0008422	beta-glucosidase activity	9	O82772, D7MPK7, A0A078FK28, M4CF23, D7L7Z4, A0A0D3ACP6, A0A087GIK0, D7M9X2, A0A178URS6	26	0.00169289	0.074831
GO:0019761	glucosinolate biosynthetic process	9	V5Q698, D7LJX7, V4KD85, R0I4D1, A0A087HAZ7, D7MV68, A0A087GZ28, Q93VW5, A0A0A0N2Z4	26	0.00169289	0.074831
GO:0005615	extracellular space	7	A0A078I2G0, E4MWB2, E4MW96, A0A178WBW6, R0HAU6, D7MQ24, D7M9X2	17	0.00176559	0.0768437
GO:0010431	seed maturation	6	A0A087GW30, D7M1H6, A0A078GAK2, A0A078I437, V4LDL5, D7LBP2	13	0.00189319	0.0807228
GO:0098791	Golgi subcompartment	20	A0A178V0E9, A0A087GEG9, V4M069, D7KS71, R0HNB6, A0A078CJJ1, R0I0Y7, R0IMT8, M4E7B9, R0GXG8, A0A087GIZ8, D7M3J2, A0A0D3E2R7, V4K8F1, Q8H118, A0A0D3CVE8, A0A178UZD4, A0A178VKB9, R0GQQ8, R0HVT6	88	0.00191178	0.0807228
GO:0016627	oxidoreductase activity, acting on the CH-CH group of donors	16	A0A087GZ98, A0A078DXE8, A0A078DKU7, V4LNI4, V4JR39, M4CFM2, R0GM91, A0A087GKB9, D7LA42, A0A078IPM7, A0A178UNP1, A0A0D2ZX28, A0A078EVL1, D7LYF5, A0A087GAY4, V4MBI2	65	0.00223043	0.0927924
GO:0009723	response to ethylene	10	B0ZX82, R0FDJ8, A0A078DKU7, A0A178WJZ1, A0A087GAY4, V4MBZ6, M4CFM2, A0A178URS6, C3S7U7, R0GM91	32	0.00228184	0.0935556
GO:0019748	secondary metabolic process	28	D7KVA3, A0A087HBY0, V4P9U3, A0A087GLU5, V4L4Q7, D7LHB8, O82772, D7LA42, V5Q698, V4L9M5, V4MA11, M4ES88, A0A178UDK3, V4KC14, A0A087GZ28, D7LJX7, R0I4D1, Q3E6Y4, D7MV68, A0A0A0N2Z4, R0IN02, V4KD85, O22809, V4L1B6, A0A087HAZ7, V4MBI2, Q93VW5, R0HVT6	141	0.00243338	0.0983435
GO:0080043	quercetin 3-O-glucosyltransferase activity	7	A0A178UZN6, A0A087HBY0, A0A087HLD0, A0A087HLA4, A0A0D3DYT6, D7MVE3, Q9LFJ9	18	0.00260633	0.102407
GO:0080044	quercetin 7-O-glucosyltransferase activity	7	A0A178UZN6, A0A087HBY0, A0A087HLD0, A0A087HLA4, A0A0D3DYT6, D7MVE3, Q9LFJ9	18	0.00260633	0.102407
GO:0031977	thylakoid lumen	20	V4L9A6, A0A087GW30, B6EUA5, P00294, A0A078CM95, D7MSA9, R0FME5, A0A087HL65, Q9M2P7, A0A087HIW3, R0H0T1, A0A078CQS6, R0GFS8, A0A078IAV5, D7M1Z0, Q93ZQ0, V4M240, D7L3B5, A0A178UA59, V4NDH1	91	0.00291475	0.112535
GO:0016485	protein processing	10	A0A087GD00, E4MW12, D7L560, A0A087HCC7, M4E415, A0A0D3BYG4, Q0WW96, E4MX40, R0HRD5, A0A078C054	33	0.00294365	0.112535
GO:0006875	cellular metal ion homeostasis	9	A0A087FY81, R0EVP1, D7LF25, V4KQ77, A0A078FPP2, R0HB18, A0A178VRQ2, A0A078I437, R0FGI7	28	0.00303031	0.114303
GO:0005976	polysaccharide metabolic process	28	R0GVN4, A0A078GAK2, V4JQT7, A0A087H361, D7KLH0, A0A087GIZ8, A0A078H9S8, V4MAN4, V4KVI9, M4CNQ7, Q0GPY3, R0FMI3, C3S7U7, V4LT85, A0A078GRZ7, V4M069, V4LKQ8, A0A078HWY0, R0HNB6, A0A078CJJ1, A0A178URS6, D7KID6, A0A078I2G0, R0GXB3, V4KQF7, R0EVU0, R0HVT6, V4LDL5	144	0.00334357	0.12446
GO:0006063	uronic acid metabolic process	7	A0A178UZN6, A0A087HBY0, A0A087HLD0, A0A087HLA4, A0A0D3DYT6, D7MVE3, Q9LFJ9	19	0.00372356	0.130972
GO:0052696	flavonoid glucuronidation	7	A0A178UZN6, A0A087HBY0, A0A087HLD0, A0A087HLA4, A0A0D3DYT6, D7MVE3, Q9LFJ9	19	0.00372356	0.130972
GO:0052695	cellular glucuronidation	7	A0A178UZN6, A0A087HBY0, A0A087HLD0, A0A087HLA4, A0A0D3DYT6, D7MVE3, Q9LFJ9	19	0.00372356	0.130972
GO:0019585	glucuronate metabolic process	7	A0A178UZN6, A0A087HBY0, A0A087HLD0, A0A087HLA4, A0A0D3DYT6, D7MVE3, Q9LFJ9	19	0.00372356	0.130972
GO:0042445	hormone metabolic process	10	D7LA42, D7LUW2, O04907, A0A078EVL1, R0FDJ8, B0ZX82, A0A178WJZ1, Q93VW5, A0A087HLA4, A0A0D3DYC5	34	0.00374999	0.130972
GO:0016741	transferase activity, transferring one-carbon groups	20	A0A178V0E9, D7KN61, A0A087HPU9, A0A0D3DFZ4, V4L2K1, V4MLJ7, A0A078CBH7, V4LGD7, A0A0D3BKF7, Q9FFE0, A0A078F7S0, A0A078D820, V4L9K1, R0IMT8, R0GXG8, M4DGN9, V4K8F1, Q8H118, A0A078II86, Q2PQS3	93	0.00380307	0.131206
GO:0031976	plastid thylakoid	72	D7MSA9, R0FME5, V4LNN4, V4JR39, V4P6G2, A0A078F1W9, A0A078CQS6, R0GPX2, A0A078IAV5, V4M240, R0FWY6, R0FGI7, V4L9A6, A0A087GW30, V4L870, A0A078CM95, E4MVR1, A0A087HL65, A0A178W0Q2, V4MDD9, R0GM91, Q8LCQ4, R0GFS8, D7L7P4, V4NCP4, D7M1Z0, Q93ZQ0, A0A178VQH8, A0A087GAY4, B6EUA5, A0A175DDT6, P00294, A0A087G4X8, D7LTD9, Q9M2P7, M4CFM2, A0A087HIW3, R0H0T1, D7M9P5, A0A178WEF9, R0FG26, A0A087H5C5, A0A078D…	466	0.00439959	0.148172
GO:0009534	chloroplast thylakoid	72	D7MSA9, R0FME5, V4LNN4, V4JR39, V4P6G2, A0A078F1W9, A0A078CQS6, R0GPX2, A0A078IAV5, V4M240, R0FWY6, R0FGI7, V4L9A6, A0A087GW30, V4L870, A0A078CM95, E4MVR1, A0A087HL65, A0A178W0Q2, V4MDD9, R0GM91, Q8LCQ4, R0GFS8, D7L7P4, V4NCP4, D7M1Z0, Q93ZQ0, A0A178VQH8, A0A087GAY4, B6EUA5, A0A175DDT6, P00294, A0A087G4X8, D7LTD9, Q9M2P7, M4CFM2, A0A087HIW3, R0H0T1, D7M9P5, A0A178WEF9, R0FG26, A0A087H5C5, A0A078D…	466	0.00439959	0.148172
GO:0045489	pectin biosynthetic process	4	V4M069, R0HNB6, A0A078CJJ1, R0FMI3	7	0.00454144	0.149392
GO:0016760	cellulose synthase (UDP-forming) activity	4	A0A087GIZ8, M4CNQ7, Q0GPY3, R0HVT6	7	0.00454144	0.149392
GO:0051604	protein maturation	10	A0A087GD00, E4MW12, D7L560, A0A087HCC7, M4E415, A0A0D3BYG4, E4MX40, Q0WW96, R0HRD5, A0A078C054	35	0.00472169	0.153536
GO:0016740	transferase activity	132	V4P148, A0A078FGR2, A0A078GAK2, V4P9U3, V4L2K1, A0A087GLU5, M4DTX0, V4LGD7, A0A078F7S0, A0A078D820, R0IMT8, A0A087HPB5, R0GXG8, M4DGN9, A0A087G6B2, A0A0D3DFZ4, D7LZA7, A0A087GJJ7, D7L0W7, D7MNW6, A0A087GN96, A0A087HR60, A0A078CBH7, Q9FFE0, V4LCV3, A0A0D3ANS5, V4L1B6, Q8H118, A0A078JZK8, R0GTW4, Q8W1M5, A0A087GZ16, A0A178UZN6, A0A087HBY0, D7L7X0, A0A087HLD0, A0A178VMR4, V4LS18, A0A0D3BKF7, A0A0D3D…	937	0.00479823	0.154252
GO:0009072	aromatic amino acid family metabolic process	13	D7LUW2, A0A087GEG9, M4EUD3, D7MNW6, A0A078FM14, A0A0D3D1J6, A0A078BX32, A0A0D3E2R7, R0FDJ8, A0A178WJZ1, Q8W1M5, Q93VW5, A0A178VZJ5	52	0.00486869	0.154759
GO:0009579	thylakoid	84	A0A087HNR9, D7MSA9, V4LNN4, R0FME5, V4JR39, V4P6G2, A0A078F1W9, A0A078CQS6, D7LHB8, R0GPX2, A0A078IAV5, V4M240, R0FWY6, R0FGI7, A0A087GW30, V4L9A6, A0A078DDQ2, V4L870, A0A078CM95, V4KQ77, F4HXZ3, E4MVR1, A0A178W0Q2, A0A087HL65, V4MDD9, R0GM91, Q8LCQ4, D7L7P4, R0GFS8, V4NCP4, D7M1Z0, Q93ZQ0, A0A178VQH8, A0A087GAY4, R0GZW2, B6EUA5, A0A175DDT6, P00294, A0A087G4X8, D7LTD9, Q9M2P7, M4CFM2, R0H0T1, A0A…	561	0.00517422	0.162643
GO:1901700	response to oxygen-containing compound	63	V4LNV9, D7KVA3, D7LF25, A0A078DXE8, B0ZX82, A0A078FPP2, A0A0D3A1T8, V4LKH6, R0I6C7, A0A078HNN8, V4NYR7, A0A078I437, A0A087H5Y3, A9Q115, V4MLG8, V4KJE9, A0A087HPB5, V4MA11, D7MCA9, R0FGI7, A0A087GW30, R0INE7, D7L0W7, A0A087HIQ4, D7KLE0, R0GXB3, F4K0E8, R0HP78, O22809, A0A087G8C1, M4F776, V4L1B6, A0A087GZ16, V4LR78, A0A078CXB7, Q8H6F3, A0A078GNK2, D7LGB8, O78310, D7M4F3, Q39096, A0A087GSM6, R0F3T4,…	402	0.00547871	0.167944
GO:0008460	dTDP-glucose 4,6-dehydratase activity	3	A0A0D3CVE8, D7KVC4, A0A078HTC6	4	0.00552097	0.167944
GO:0004776	succinate-CoA ligase (GDP-forming) activity	3	V4LED1, D7M1P5, A0A078HSE9	4	0.00552097	0.167944
GO:0031225	anchored component of membrane	14	A0A078CI95, A0A078G391, V4L2R1, A0A078FK28, F4I378, V4LX97, M4CF23, A0A087GIK0, A0A178UPT8, V4LAQ5, D7MPK7, A0A178V3V0, M4EKF7, D7LAQ2	60	0.00685088	0.204943
GO:0042446	hormone biosynthetic process	8	D7LA42, D7LUW2, O04907, A0A078EVL1, R0FDJ8, A0A178WJZ1, Q93VW5, A0A0D3DYC5	26	0.00688216	0.204943
GO:0009646	response to absence of light	5	R0FFN4, Q8L847, A0A087GAY4, M4CFM2, R0GM91	12	0.00782106	0.230477
GO:0042435	indole-containing compound biosynthetic process	9	D7LUW2, O04907, V4L1B6, R0FDJ8, A0A178WJZ1, A0A078FM14, Q93VW5, A0A0D3DYC5, A0A178VZJ5	32	0.00808545	0.233406
GO:0009225	nucleotide-sugar metabolic process	9	D7M6Z2, A0A078CAC6, A0A087GWV7, A0A087HRZ5, R0HVR1, A0A0D3CVE8, D7KVC4, A0A078HTC6, V4LAG2	32	0.00808545	0.233406
GO:0016759	cellulose synthase activity	4	A0A087GIZ8, M4CNQ7, Q0GPY3, R0HVT6	8	0.00826262	0.236111
GO:0055065	metal ion homeostasis	10	A0A087FY81, R0EVP1, P00294, D7LF25, V4KQ77, A0A078FPP2, R0HB18, A0A178VRQ2, A0A078I437, R0FGI7	38	0.00885319	0.249266
GO:0031978	plastid thylakoid lumen	15	V4L9A6, B6EUA5, P00294, D7MSA9, R0FME5, A0A087HL65, A0A087HIW3, A0A078CQS6, R0GFS8, A0A078IAV5, D7M1Z0, Q93ZQ0, V4M240, A0A178UA59, V4NDH1	68	0.00898732	0.249266
GO:0009543	chloroplast thylakoid lumen	15	V4L9A6, B6EUA5, P00294, D7MSA9, R0FME5, A0A087HL65, A0A087HIW3, A0A078CQS6, R0GFS8, A0A078IAV5, D7M1Z0, Q93ZQ0, V4M240, A0A178UA59, V4NDH1	68	0.00898732	0.249266
GO:0005975	carbohydrate metabolic process	84	M4C903, A0A078GAK2, A0A078J089, D7M2Y3, V4KIC1, M4CF23, D7L7Z4, A0A087GIK0, V4MRK7, A0A078HPN4, D7MPK7, V4KVI9, V4MAN4, D7M4H7, R0FMI3, A0A0D3ACP6, V4LAE1, A0A087G5Q3, V4LKQ8, A0A078H0Z9, A0A078JUU3, A0A087GS72, V4LX24, A0A078I2G0, R0GXB3, V4LCV3, D7L6J2, A0A078JFX0, R0EVU0, A0A078JZK8, A0A178VQH8, A0A0D3DPA9, R0HVT6, V4LDL5, A0A0D3E0X4, R0I216, R0GVN4, A0A178UZN6, A0A087HBY0, D7M4B8, A0A087HLD0,…	576	0.010321	0.264373
GO:0071472	cellular response to salt stress	5	O78310, D7MCA9, R0HB18, A0A087HLA4, A9Q115	13	0.011526	0.264373
GO:0008017	microtubule binding	7	V4L088, V4MN80, A0A0D3B3D4, A0A0D3BI84, V4KY43, A0A0D3DX99, V4MBZ6	23	0.0120364	0.264373
GO:0000162	tryptophan biosynthetic process	6	D7LUW2, R0FDJ8, A0A178WJZ1, A0A078FM14, Q93VW5, A0A178VZJ5	18	0.0123851	0.264373
GO:0046219	indolalkylamine biosynthetic process	6	D7LUW2, R0FDJ8, A0A178WJZ1, A0A078FM14, Q93VW5, A0A178VZJ5	18	0.0123851	0.264373
GO:0044436	thylakoid part	62	D7MSA9, V4LNN4, R0FME5, V4JR39, V4P6G2, A0A078F1W9, A0A078CQS6, R0GPX2, A0A078IAV5, V4M240, R0FGI7, A0A087GW30, V4L9A6, V4L870, A0A078CM95, E4MVR1, A0A087HL65, V4MDD9, Q8LCQ4, D7L7P4, R0GFS8, V4NCP4, D7M1Z0, Q93ZQ0, A0A178VQH8, B6EUA5, A0A175DDT6, P00294, A0A087G4X8, Q9M2P7, R0H0T1, A0A087HIW3, A0A178WEF9, R0FG26, A0A087H5C5, A0A078DQF1, V4L7G4, Q9M591, A0A078GMA7, A0A087HNH6, V4MEL6, R0GYW8, A0A…	410	0.0126048	0.264373
GO:0009647	skotomorphogenesis	3	A0A087GAY4, M4CFM2, R0GM91	5	0.0126249	0.264373
GO:0004774	succinate-CoA ligase activity	3	V4LED1, D7M1P5, A0A078HSE9	5	0.0126249	0.264373
GO:0009861	jasmonic acid and ethylene-dependent systemic resistance	3	V4KD85, B0ZX82, C3S7U7	5	0.0126249	0.264373
GO:0046658	anchored component of plasma membrane	11	A0A078CI95, A0A178UPT8, A0A078G391, V4L2R1, V4LAQ5, D7MPK7, A0A078FK28, A0A178V3V0, M4CF23, A0A087GIK0, D7LAQ2	46	0.0130524	0.264373
GO:0051879	Hsp90 protein binding	2	A0A178W7K7, M4EUP7	2	0.0131766	0.264373
GO:0004049	anthranilate synthase activity	2	R0FDJ8, A0A178WJZ1	2	0.0131766	0.264373
GO:0046368	GDP-L-fucose metabolic process	2	A0A087GWV7, V4LAG2	2	0.0131766	0.264373
GO:0042350	GDP-L-fucose biosynthetic process	2	A0A087GWV7, V4LAG2	2	0.0131766	0.264373
GO:0022611	dormancy process	2	D7M1H6, D7LBP2	2	0.0131766	0.264373
GO:0005950	anthranilate synthase complex	2	R0FDJ8, A0A178WJZ1	2	0.0131766	0.264373
GO:0016131	brassinosteroid metabolic process	2	D7LA42, A0A078EVL1	2	0.0131766	0.264373
GO:0001671	ATPase activator activity	2	A0A0D3B2W2, F4J8L7	2	0.0131766	0.264373
GO:0008446	GDP-mannose 4,6-dehydratase activity	2	A0A078CAC6, A0A087GWV7	2	0.0131766	0.264373
GO:0080082	esculin beta-glucosidase activity	2	D7L7Z4, A0A0D3ACP6	2	0.0131766	0.264373
GO:0016128	phytosteroid metabolic process	2	D7LA42, A0A078EVL1	2	0.0131766	0.264373
GO:0015098	molybdate ion transmembrane transporter activity	2	D7KS71, A0A178UZD4	2	0.0131766	0.264373
GO:0047668	amygdalin beta-glucosidase activity	2	D7L7Z4, A0A0D3ACP6	2	0.0131766	0.264373
GO:0080081	4-methylumbelliferyl-beta-D-glucopyranoside beta-glucosidase activity	2	D7L7Z4, A0A0D3ACP6	2	0.0131766	0.264373
GO:0047130	saccharopine dehydrogenase (NADP+, L-lysine-forming) activity	2	A0A078CGS5, R0GXU4	2	0.0131766	0.264373
GO:0009871	jasmonic acid and ethylene-dependent systemic resistance, ethylene mediated signaling pathway	2	B0ZX82, C3S7U7	2	0.0131766	0.264373
GO:0046085	adenosine metabolic process	2	V4LCV3, A0A087G8C1	2	0.0131766	0.264373
GO:0080083	beta-gentiobiose beta-glucosidase activity	2	D7L7Z4, A0A0D3ACP6	2	0.0131766	0.264373
GO:0004655	porphobilinogen synthase activity	2	A0A078EKR3, M4F785	2	0.0131766	0.264373
GO:0042183	formate catabolic process	2	D7M6N1, R0GZW2	2	0.0131766	0.264373
GO:0016621	cinnamoyl-CoA reductase activity	2	V4MA11, O22809	2	0.0131766	0.264373
GO:0015942	formate metabolic process	2	D7M6N1, R0GZW2	2	0.0131766	0.264373
GO:0015689	molybdate ion transport	2	D7KS71, A0A178UZD4	2	0.0131766	0.264373
GO:0016132	brassinosteroid biosynthetic process	2	D7LA42, A0A078EVL1	2	0.0131766	0.264373
GO:0004753	saccharopine dehydrogenase activity	2	A0A078CGS5, R0GXU4	2	0.0131766	0.264373
GO:0008863	formate dehydrogenase (NAD+) activity	2	D7M6N1, R0GZW2	2	0.0131766	0.264373
GO:0010162	seed dormancy process	2	D7M1H6, D7LBP2	2	0.0131766	0.264373
GO:0009374	biotin binding	2	V4KUK0, G4WXD8	2	0.0131766	0.264373
GO:0016129	phytosteroid biosynthetic process	2	D7LA42, A0A078EVL1	2	0.0131766	0.264373
GO:0016833	oxo-acid-lyase activity	4	D7MNW6, R0FDJ8, A0A178WJZ1, Q9FFE0	9	0.0135355	0.267775
GO:0008171	O-methyltransferase activity	4	A0A0D3DFZ4, M4DGN9, V4MLJ7, A0A078F7S0	9	0.0135355	0.267775
GO:0016878	acid-thiol ligase activity	9	V4LED1, A0A078IEP9, D7M1P5, D7MH76, Q3E6Y4, V4L4Q7, A0A178VSW7, A0A078HSE9, V4L5N5	35	0.0148809	0.292348
GO:0030243	cellulose metabolic process	7	A0A087GIZ8, A0A078H9S8, V4JQT7, M4CNQ7, Q0GPY3, R0HVT6, A0A178URS6	24	0.0153505	0.299493
GO:0051651	maintenance of location in cell	5	A0A087FY81, D7LF25, A0A078FPP2, R0HB18, R0FGI7	14	0.0162657	0.308978
GO:0071470	cellular response to osmotic stress	5	O78310, D7MCA9, R0HB18, A0A087HLA4, A9Q115	14	0.0162657	0.308978
GO:0009098	leucine biosynthetic process	6	D7LJX7, R0I4D1, D7MNW6, A0A087HAZ7, D7MV68, A0A087GZ28	19	0.0163827	0.308978
GO:0000041	transition metal ion transport	6	A0A087FY81, R0EVP1, V4KQ77, D7LF25, A0A078FPP2, R0FGI7	19	0.0163827	0.308978
GO:0004028	3-chloroallyl aldehyde dehydrogenase activity	6	R0INE7, V4KJE9, A0A0D3C1Q3, R0F3T4, D7LHI8, V4MBI2	19	0.0163827	0.308978
GO:0009654	photosystem II oxygen evolving complex	8	A0A078CQS6, A0A175DDT6, A0A078IAV5, R0FME5, A0A0D3A7X4, A0A075C687, D7M1Z0, Q6DV58	30	0.0170604	0.319628
GO:0044550	secondary metabolite biosynthetic process	16	D7LJX7, R0I4D1, D7MV68, A0A0A0N2Z4, V5Q698, V4MA11, V4L9M5, V4KD85, O22809, V4L1B6, M4ES88, A0A087HAZ7, A0A087GZ28, Q93VW5, R0HVT6, V4MBI2	80	0.0180766	0.336438
GO:0005768	endosome	20	A0A178V0E9, A0A087GEG9, V4M069, D7KS71, R0HNB6, A0A078CJJ1, R0I0Y7, R0IMT8, M4E7B9, R0GXG8, A0A087GIZ8, D7M3J2, A0A0D3E2R7, V4K8F1, Q8H118, A0A0D3CVE8, A0A178UZD4, A0A178VKB9, R0GQQ8, R0HVT6	107	0.018302	0.338408
GO:0015631	tubulin binding	7	V4L088, V4MN80, A0A0D3B3D4, A0A0D3BI84, V4KY43, A0A0D3DX99, V4MBZ6	25	0.0192647	0.351611
GO:0048609	multicellular organismal reproductive process	7	A0A087GW30, D7M1H6, A0A078GAK2, A0A078GWX8, A0A078I437, V4LDL5, D7LBP2	25	0.0192647	0.351611
GO:0009505	plant-type cell wall	31	D7M4B8, V4LX97, V4KIC1, R0I9M8, M4CF23, R0GTD1, D7L7Z4, A0A087GIK0, A0A078G2D0, D7M3J2, V4LAQ5, A0A178WBW6, V4KCR9, A0A0D3ACP6, D7M4H7, A0A078CI95, V4LT85, A0A087G5Q3, V4LKQ8, A0A078FK28, E4MW96, R0HB45, A0A087HIQ4, A0A078GWX8, V4LX24, V4LQK9, R0GXB3, D7L6J2, R0EVU0, A0A078DDT2, A0A087HRE3	186	0.0202277	0.366822
GO:0016143	S-glycoside metabolic process	11	O82772, V5Q698, D7LJX7, V4KD85, R0I4D1, A0A178UDK3, A0A087HAZ7, D7MV68, A0A087GZ28, Q93VW5, A0A0A0N2Z4	49	0.0207554	0.36929
GO:0019757	glycosinolate metabolic process	11	O82772, V5Q698, D7LJX7, V4KD85, R0I4D1, A0A178UDK3, A0A087HAZ7, D7MV68, A0A087GZ28, Q93VW5, A0A0A0N2Z4	49	0.0207554	0.36929
GO:0019760	glucosinolate metabolic process	11	O82772, V5Q698, D7LJX7, V4KD85, R0I4D1, A0A178UDK3, A0A087HAZ7, D7MV68, A0A087GZ28, Q93VW5, A0A0A0N2Z4	49	0.0207554	0.36929
GO:0004029	aldehyde dehydrogenase (NAD) activity	6	R0INE7, V4KJE9, A0A0D3C1Q3, R0F3T4, D7LHI8, V4MBI2	20	0.0211881	0.374633
GO:0008113	peptide-methionine (S)-S-oxide reductase activity	3	A0A078CT22, D7MV45, D7LAE7	6	0.0231094	0.377899
GO:0051552	flavone metabolic process	3	A0A087HLD0, D7KVC4, A0A0D3DYT6	6	0.0231094	0.377899
GO:0051553	flavone biosynthetic process	3	A0A087HLD0, D7KVC4, A0A0D3DYT6	6	0.0231094	0.377899
GO:0051554	flavonol metabolic process	3	A0A087HLD0, D7KVC4, A0A0D3DYT6	6	0.0231094	0.377899
GO:0004738	pyruvate dehydrogenase activity	3	A0A078J089, V4MBI2, V4LAE1	6	0.0231094	0.377899
GO:0006531	aspartate metabolic process	3	R0I4D1, D7MNW6, A0A087HAZ7	6	0.0231094	0.377899
GO:0045298	tubulin complex	3	V4LX88, A0A087GP42, B9DGT7	6	0.0231094	0.377899
GO:0016126	sterol biosynthetic process	3	A0A087HPU9, A0A078EVL1, A0A178V9E4	6	0.0231094	0.377899
GO:0003861	3-isopropylmalate dehydratase activity	3	D7LJX7, D7MV68, A0A087GZ28	6	0.0231094	0.377899
GO:0051275	beta-glucan catabolic process	3	A0A078H9S8, V4JQT7, A0A178URS6	6	0.0231094	0.377899
GO:0006532	aspartate biosynthetic process	3	R0I4D1, D7MNW6, A0A087HAZ7	6	0.0231094	0.377899
GO:0030245	cellulose catabolic process	3	A0A078H9S8, V4JQT7, A0A178URS6	6	0.0231094	0.377899
GO:0051555	flavonol biosynthetic process	3	A0A087HLD0, D7KVC4, A0A0D3DYT6	6	0.0231094	0.377899
GO:0006551	leucine metabolic process	7	D7LJX7, R0I4D1, Q8L847, D7MNW6, A0A087HAZ7, D7MV68, A0A087GZ28	26	0.0238267	0.387105
GO:0071214	cellular response to abiotic stimulus	11	O78310, D7KVA3, D7MCA9, O64730, V4KC14, A0A087H3J5, A0A126X281, R0HB18, B9DGT7, A0A087HLA4, A9Q115	50	0.023946	0.387105
GO:0006643	membrane lipid metabolic process	6	A0A178UMQ8, A0A087G5Q3, A0A178VXV8, D7M4I1, V4LZG5, V4LX24	21	0.0268631	0.429354
GO:0009851	auxin biosynthetic process	6	D7LUW2, O04907, R0FDJ8, A0A178WJZ1, Q93VW5, A0A0D3DYC5	21	0.0268631	0.429354
GO:1901362	organic cyclic compound biosynthetic process	72	A0A087HRR4, A0A087GEG9, O04907, A0A087HRZ5, A0A078FM14, R0HB18, V4JR39, M4DS51, D7LA42, V4MA11, A0A078BX32, V4MK94, M4F785, A0A078DKD9, D7MDG3, A0A0D3DFZ4, V4L870, A0A178WJP3, D7MNW6, R0GM91, D7LLE8, V4LCV3, O22809, R0I0R2, A0A087GF69, V4L1B6, R0FDJ8, A0A078C2E1, A0A087GAY4, V4LP72, Q8W1M5, R0HVT6, A0A178V9E4, V4MBI2, A0A0D3DYC5, A0A087GZ16, A0A178VZJ5, D7LUW2, D7LTD9, A0A078I2R1, A0A178VMR4, D7L…	505	0.0273413	0.434542
GO:0009850	auxin metabolic process	7	D7LUW2, O04907, R0FDJ8, A0A178WJZ1, Q93VW5, A0A0D3DYC5, A0A087HLA4	27	0.0290797	0.443822
GO:0009411	response to UV	7	O78310, P00294, V4L1B6, V4NC17, A0A0A0N2Z4, A9Q115, D7KLH0	27	0.0290797	0.443822
GO:0032504	multicellular organism reproduction	7	A0A087GW30, D7M1H6, A0A078GAK2, A0A078GWX8, A0A078I437, V4LDL5, D7LBP2	27	0.0290797	0.443822
GO:0016405	CoA-ligase activity	5	V4LED1, D7M1P5, Q3E6Y4, V4L4Q7, A0A078HSE9	16	0.0292404	0.443822
GO:0051235	maintenance of location	5	A0A087FY81, D7LF25, A0A078FPP2, R0HB18, R0FGI7	16	0.0292404	0.443822
GO:0006664	glycolipid metabolic process	4	A0A178UMQ8, A0A087G5Q3, D7M4I1, V4LX24	11	0.0294014	0.443822
GO:0004197	cysteine-type endopeptidase activity	4	E4MW12, E4MWB2, R0HAU6, D7MQ24	11	0.0294014	0.443822
GO:0016998	cell wall macromolecule catabolic process	4	A0A078I2G0, A0A078GY33, A0A087H361, C3S7U7	11	0.0294014	0.443822
GO:2000113	negative regulation of cellular macromolecule biosynthetic process	9	D7M1H6, O78310, A0A087HPU9, P00294, R0I0R2, A0A178VMR4, A0A078E0U6, A0A078C2E1, A9Q115	39	0.029494	0.443822
GO:0010558	negative regulation of macromolecule biosynthetic process	9	D7M1H6, O78310, A0A087HPU9, P00294, R0I0R2, A0A178VMR4, A0A078E0U6, A0A078C2E1, A9Q115	39	0.029494	0.443822
GO:0009226	nucleotide-sugar biosynthetic process	6	A0A087GWV7, A0A087HRZ5, R0HVR1, A0A0D3CVE8, D7KVC4, V4LAG2	22	0.0334601	0.471631
GO:0006568	tryptophan metabolic process	6	D7LUW2, R0FDJ8, A0A178WJZ1, A0A078FM14, Q93VW5, A0A178VZJ5	22	0.0334601	0.471631
GO:0006586	indolalkylamine metabolic process	6	D7LUW2, R0FDJ8, A0A178WJZ1, A0A078FM14, Q93VW5, A0A178VZJ5	22	0.0334601	0.471631
GO:0042651	thylakoid membrane	55	V4LNN4, R0FME5, V4JR39, A0A078F1W9, A0A078CQS6, R0GPX2, A0A078IAV5, V4M240, R0FGI7, A0A087GW30, V4L870, A0A078CM95, E4MVR1, V4MDD9, Q8LCQ4, D7L7P4, V4NCP4, D7M1Z0, A0A178VQH8, B6EUA5, A0A175DDT6, P00294, A0A087G4X8, Q9M2P7, R0H0T1, A0A087HIW3, A0A178WEF9, R0FG26, A0A087H5C5, A0A078DQF1, V4L7G4, Q9M591, A0A078GMA7, A0A087HNH6, V4MEL6, R0GYW8, A0A087GLL4, A0A087H2R7, D7L560, V4M069, A0A087HCC7, A0A…	377	0.0341785	0.471631
GO:0071669	plant-type cell wall organization or biogenesis	8	D7LA42, R0GXB3, A0A087GIZ8, A0A078JZ04, R0GTD1, A0A078CJJ1, A0A078I3C9, R0HVT6	34	0.0351391	0.471631
GO:0030867	rough endoplasmic reticulum membrane	2	A0A078GLC2, D7LRR8	3	0.0365101	0.471631
GO:0010200	response to chitin	2	D7LGB8, V4L1B6	3	0.0365101	0.471631
GO:0046440	L-lysine metabolic process	2	A0A078CGS5, R0GXU4	3	0.0365101	0.471631
GO:0004777	succinate-semialdehyde dehydrogenase (NAD+) activity	2	A0A0D3C1Q3, D7LHI8	3	0.0365101	0.471631
GO:0003849	3-deoxy-7-phosphoheptulonate synthase activity	2	A0A078BX32, A0A0D3D1J6	3	0.0365101	0.471631
GO:0019477	L-lysine catabolic process	2	A0A078CGS5, R0GXU4	3	0.0365101	0.471631
GO:0006627	protein processing involved in protein targeting to mitochondrion	2	D7L560, A0A087HCC7	3	0.0365101	0.471631
GO:0004567	beta-mannosidase activity	2	D7L7Z4, A0A0D3ACP6	3	0.0365101	0.471631
GO:0009013	succinate-semialdehyde dehydrogenase [NAD(P)+] activity	2	A0A0D3C1Q3, D7LHI8	3	0.0365101	0.471631
GO:0071256	translocon complex	2	A0A078GLC2, D7LRR8	3	0.0365101	0.471631
GO:0006554	lysine catabolic process	2	A0A078CGS5, R0GXU4	3	0.0365101	0.471631
GO:0071324	cellular response to disaccharide stimulus	2	O78310, A9Q115	3	0.0365101	0.471631
GO:0009061	anaerobic respiration	2	D7L8U7, A0A078EJG4	3	0.0365101	0.471631
GO:0008477	purine nucleosidase activity	2	A0A087G8C1, D7LYI5	3	0.0365101	0.471631
GO:0005791	rough endoplasmic reticulum	2	A0A078GLC2, D7LRR8	3	0.0365101	0.471631
GO:0031305	integral component of mitochondrial inner membrane	2	Q8L847, A0A078HQA4	3	0.0365101	0.471631
GO:0051184	cofactor transporter activity	2	D7M8K0, A0A087H5Y3	3	0.0365101	0.471631
GO:0080079	cellobiose glucosidase activity	2	D7L7Z4, A0A0D3ACP6	3	0.0365101	0.471631
GO:0008886	glyceraldehyde-3-phosphate dehydrogenase (NADP+) (non-phosphorylating) activity	2	A0A0D3C1Q3, D7LHI8	3	0.0365101	0.471631
GO:0042720	mitochondrial inner membrane peptidase complex	2	D7L560, A0A087HCC7	3	0.0365101	0.471631
GO:0016673	oxidoreductase activity, acting on a sulfur group of donors, iron-sulfur protein as acceptor	2	V4NQW9, M4EZ85	3	0.0365101	0.471631
GO:1901562	response to paraquat	2	A0A087GW30, A0A078I437	3	0.0365101	0.471631
GO:0071329	cellular response to sucrose stimulus	2	O78310, A9Q115	3	0.0365101	0.471631
GO:0010326	methionine-oxo-acid transaminase activity	2	R0I4D1, A0A087HAZ7	3	0.0365101	0.471631
GO:0050311	sulfite reductase (ferredoxin) activity	2	V4NQW9, M4EZ85	3	0.0365101	0.471631
GO:0005784	Sec61 translocon complex	2	A0A078GLC2, D7LRR8	3	0.0365101	0.471631
GO:0047484	regulation of response to osmotic stress	3	D7LZA7, V4L1B6, A0A078I437	7	0.0370354	0.471951
GO:0031304	intrinsic component of mitochondrial inner membrane	3	Q8L847, A0A078HQA4, A0A0D3EGS7	7	0.0370354	0.471951
GO:0046688	response to copper ion	3	O78310, P00294, A9Q115	7	0.0370354	0.471951
GO:0006040	amino sugar metabolic process	5	A0A078I2G0, A0A078GY33, A0A087HRZ5, R0HVR1, C3S7U7	17	0.0376216	0.476961
GO:1901617	organic hydroxy compound biosynthetic process	10	D7M9P5, D7LA42, A0A087HPU9, V4L870, A0A078EVL1, A0A087HLD0, V4JR39, D7KVC4, A0A178V9E4, A0A0D3DYT6	47	0.0377657	0.476961
GO:0000272	polysaccharide catabolic process	13	R0GVN4, V4LT85, A0A078GRZ7, V4LKQ8, A0A078HWY0, V4JQT7, A0A178URS6, A0A078I2G0, A0A078H9S8, R0EVU0, V4MAN4, V4KVI9, C3S7U7	67	0.039027	0.4907
GO:0023014	signal transduction by protein phosphorylation	4	A0A087HPB5, V4L1B6, B0ZX82, A0A126X281	12	0.0401916	0.503107
GO:0034357	photosynthetic membrane	55	V4LNN4, R0FME5, V4JR39, A0A078F1W9, A0A078CQS6, R0GPX2, A0A078IAV5, V4M240, R0FGI7, A0A087GW30, V4L870, A0A078CM95, E4MVR1, V4MDD9, Q8LCQ4, D7L7P4, V4NCP4, D7M1Z0, A0A178VQH8, B6EUA5, A0A175DDT6, P00294, A0A087G4X8, Q9M2P7, R0H0T1, A0A087HIW3, A0A178WEF9, R0FG26, A0A087H5C5, A0A078DQF1, V4L7G4, Q9M591, A0A078GMA7, A0A087HNH6, V4MEL6, R0GYW8, A0A087GLL4, A0A087H2R7, D7L560, V4M069, A0A087HCC7, A0A…	381	0.0406981	0.506041
GO:0009309	amine biosynthetic process	6	D7LUW2, R0FDJ8, A0A178WJZ1, A0A078FM14, Q93VW5, A0A178VZJ5	23	0.0410214	0.506041
GO:0042401	cellular biogenic amine biosynthetic process	6	D7LUW2, R0FDJ8, A0A178WJZ1, A0A078FM14, Q93VW5, A0A178VZJ5	23	0.0410214	0.506041
GO:0009813	flavonoid biosynthetic process	8	A0A178UZN6, A0A087HBY0, A0A087HLD0, D7KVC4, A0A0D3DYT6, A0A087HLA4, D7MVE3, Q9LFJ9	35	0.0411416	0.506041
GO:0051273	beta-glucan metabolic process	7	A0A087GIZ8, A0A078H9S8, V4JQT7, M4CNQ7, Q0GPY3, R0HVT6, A0A178URS6	29	0.0418058	0.511985
GO:0042430	indole-containing compound metabolic process	10	D7LUW2, O04907, V4L1B6, R0FDJ8, A0A178WJZ1, A0A078FM14, Q93VW5, A0A087HLA4, A0A0D3DYC5, A0A178VZJ5	48	0.0429964	0.524297
GO:0031324	negative regulation of cellular metabolic process	14	A0A087GW30, Q09GN7, A0A087HPU9, P00294, A0A178VMR4, A0A078E0U6, A9Q115, V4NCV6, V4L5K5, D7M1H6, O78310, R0I0R2, A0A078C2E1, A0A078D3D0	75	0.044204	0.536708
GO:0044711	single-organism biosynthetic process	114	A0A078J089, A0A087GEG9, O04907, R0HB18, V4KUK0, A0A078D820, A0A078EGE6, M4DS51, Q9SE60, M4F785, Q09GN7, A0A0D3DFZ4, V4L870, A0A087GZ98, D7MNW6, A0A087GN96, D7MV68, A0A078CBH7, R0GM91, A0A087H276, V4LCV3, F4K0E8, V4L1B6, R0FDJ8, R0GTW4, A0A087GAY4, V4LP72, Q8W1M5, A0A178V9E4, V4MBI2, A0A087GZ16, A0A087HBY0, A0A087HLD0, D7L0J1, A0A0D3DYT6, M4CFM2, G4WXD8, D7LFE3, D7M9P5, O04130, A0A087GIZ8, M4ES88,…	858	0.0446674	0.540017
GO:0044434	chloroplast part	159	D7KNV0, D7LF25, A0A087GEG9, D7MSA9, R0FME5, D7L598, A0A078C054, A0A087GP42, V4KUK0, V4P6G2, A0A078I437, A0A078HPN4, A0A078F1W9, R0GPX2, A0A078HIH9, A0A078IAV5, D7MUM5, V4MAN4, R0FWY6, R0FGI7, A0A087GW30, V4L9A6, A0A078DDQ2, Q09GN7, V4L870, D7LZA0, M4D1I9, D7MNW6, E4MVR1, D7MV68, A0A178W0Q2, V4MDD9, R0GM91, Q8LCQ4, R0GFS8, V4KXJ0, F4K0E8, V4NCP4, D7M8K0, R0FDJ8, R0GTW4, A0A078IM40, A0A087GAY4, Q8W…	1230	0.0448856	0.540346
GO:0010817	regulation of hormone levels	11	D7LA42, D7LUW2, O04907, A0A078EVL1, R0FDJ8, B0ZX82, A0A178WJZ1, D7KVC4, Q93VW5, A0A087HLA4, A0A0D3DYC5	55	0.0453787	0.543967
GO:0010035	response to inorganic substance	66	A0A078J089, A0A078FGR2, D7KVA3, D7LF25, V4LED1, O04907, A0A078DXE8, B0ZX82, A0A078FPP2, R0I6C7, A0A078HNN8, A0A078I437, A0A087H5Y3, A9Q115, V4MLG8, V4KJE9, A0A087HPB5, V4MA11, R0FGI7, R0FYX9, A0A087GW30, R0INE7, A0A078H0Z9, M4D1I9, O80889, D7MV68, D7KLE0, A0A087GS72, V4L5N5, R0IN02, O22809, R0FFN4, R0GP63, A0A178VQH8, B9DGT7, R0GZW2, R0EVP1, P00294, V4LR78, A0A078CXB7, Q8H6F3, D7L0J1, A0A078GNK2,…	471	0.0462353	0.551897
GO:0052545	callose localization	5	D7LUW2, V4LAQ5, B0ZX82, A0A078JZK8, Q93VW5	18	0.047328	0.562566
GO:0009890	negative regulation of biosynthetic process	10	D7M1H6, V4NCV6, O78310, A0A087HPU9, P00294, R0I0R2, A0A178VMR4, A0A078E0U6, A0A078C2E1, A9Q115	49	0.0486992	0.572479
GO:0044036	cell wall macromolecule metabolic process	7	A0A078I2G0, A0A078GY33, R0GXB3, R0EVU0, A0A087H361, A0A078CJJ1, C3S7U7	30	0.049337	0.572479
GO:0010393	galacturonan metabolic process	7	R0GVN4, V4LT85, A0A078GRZ7, V4M069, R0HNB6, A0A078CJJ1, R0FMI3	30	0.049337	0.572479
GO:0045488	pectin metabolic process	7	R0GVN4, V4LT85, A0A078GRZ7, V4M069, R0HNB6, A0A078CJJ1, R0FMI3	30	0.049337	0.572479
GO:0043650	dicarboxylic acid biosynthetic process	7	A0A087GEG9, A0A078BX32, R0I4D1, D7MNW6, A0A087HAZ7, V4LKH6, Q8W1M5	30	0.049337	0.572479
GO:0044435	plastid part	159	D7KNV0, D7LF25, A0A087GEG9, D7MSA9, R0FME5, D7L598, A0A078C054, V4KUK0, A0A087GP42, V4P6G2, A0A078I437, A0A078F1W9, A0A078HPN4, R0GPX2, A0A078HIH9, A0A078IAV5, D7MUM5, V4MAN4, R0FWY6, R0FGI7, A0A087GW30, V4L9A6, Q09GN7, A0A078DDQ2, V4L870, D7LZA0, M4D1I9, D7MNW6, E4MVR1, D7MV68, A0A178W0Q2, V4MDD9, R0GM91, Q8LCQ4, R0GFS8, V4KXJ0, F4K0E8, V4NCP4, D7M8K0, R0FDJ8, A0A087GAY4, R0GTW4, A0A078IM40, Q8W…	1234	0.0494587	0.572479
GO:0006553	lysine metabolic process	6	A0A078EJW5, A0A078CGS5, A0A087GZ98, A0A078C9N3, R0GTW4, R0GXU4	24	0.0495784	0.572479
GO:0005576	extracellular region	88	V4LNV9, D7M2Y3, O04907, V4P9U3, V4LX97, V4LKH6, V4KIC1, R0I9M8, M4CF23, R0GTD1, D7L7Z4, V4NYR7, A0A087GP42, A0A078I437, A9Q115, A0A078IAV5, M4E2N4, V4MAN4, A0A178WBW6, A0A0D3ACP6, D7M4H7, A0A078CI95, A0A087GW30, A0A087G5Q3, A0A078H0Z9, V4LKQ8, V4L830, R0HB45, V4MDD9, A0A087HR60, A0A078JUU3, A0A087GS72, V4LX24, V4L5N5, R0GFS8, A0A078I2G0, M4E7B9, R0GXB3, A0A178VXV8, A0A087G8C1, A0A078JFX0, R0EVU0,…	650	0.0501056	0.576215
GO:0000271	polysaccharide biosynthetic process	11	D7KID6, A0A087GIZ8, V4M069, V4KQF7, M4CNQ7, R0HNB6, A0A078CJJ1, Q0GPY3, R0FMI3, R0HVT6, D7KLH0	56	0.0508686	0.582621
GO:0009698	phenylpropanoid metabolic process	9	D7LA42, V4MA11, A0A087HBY0, O22809, M4ES88, Q3E6Y4, V4L4Q7, R0HVT6, V4MBI2	43	0.0519972	0.588552
GO:0080167	response to karrikin	9	D7LHB8, A0A078CT22, Q570B4, A0A087HBY0, E4MVR1, A0A087G8R5, Q8VY88, R0GXU4, A0A087HLA4	43	0.0519972	0.588552
GO:0000226	microtubule cytoskeleton organization	4	V4L088, A0A0D3B3D4, V4KY43, B9DGT7	13	0.0529319	0.588552
GO:0016157	sucrose synthase activity	4	A0A078GAK2, A0A078JZK8, A0A078DNP2, V4LDL5	13	0.0529319	0.588552
GO:1903509	liposaccharide metabolic process	4	A0A178UMQ8, A0A087G5Q3, D7M4I1, V4LX24	13	0.0529319	0.588552
GO:0006457	protein folding	32	A0A078EDM1, D7MM37, A0A078FN30, A0A078JR72, Q9SIL3, V4KZY2, V4KII7, R0G9G5, A0A078DVT2, E4MYB4, V4LDY5, D7M4F3, V4MHV1, A0A078DQF1, A0A078GWE5, V4LJY9, E4MXN5, A0A0D3ALZ9, A0A0D3BD95, A0A078D6A4, M4CB77, A0A178VNU6, V4KMF0, V4JWS5, A0A087G5W0, R0GFS8, A0A078GRJ1, M4E7B9, Q9S9N1, D7MIF8, A0A178UA59, V4NDH1	209	0.0532881	0.588552
GO:0031226	intrinsic component of plasma membrane	15	A0A078CI95, A0A078G391, V4L2R1, A0A078FK28, M4CF23, A0A087GIK0, A0A178UPT8, R0I0Y7, V4LAQ5, D7MPK7, A0A178V3V0, A0A178VKB9, D7LAQ2, A0A087GGA8, R0FWY6	84	0.0535787	0.588552
GO:0060590	ATPase regulator activity	3	A0A0D3B2W2, F4J8L7, A0A078FN30	8	0.0542991	0.588552
GO:0009423	chorismate biosynthetic process	3	A0A087GEG9, A0A078BX32, Q8W1M5	8	0.0542991	0.588552
GO:0008172	S-methyltransferase activity	3	A0A078D820, V4L9K1, A0A078CBH7	8	0.0542991	0.588552
GO:0046417	chorismate metabolic process	3	A0A087GEG9, A0A078BX32, Q8W1M5	8	0.0542991	0.588552
GO:0010189	vitamin E biosynthetic process	3	D7M9P5, V4L870, V4JR39	8	0.0542991	0.588552
GO:0042360	vitamin E metabolic process	3	D7M9P5, V4L870, V4JR39	8	0.0542991	0.588552
GO:0019201	nucleotide kinase activity	3	R0GXD7, A0A087GLL4, F4JYC0	8	0.0542991	0.588552
GO:0042545	cell wall modification	8	R0GVN4, V4LT85, R0GXB3, D7LUW2, A0A078GRZ7, V4LAQ5, B0ZX82, Q93VW5	37	0.0550949	0.588645
GO:0021700	developmental maturation	8	A0A087GW30, D7M1H6, A0A078GAK2, A0A0D3DX99, A0A078I437, D8L1V9, V4LDL5, D7LBP2	37	0.0550949	0.588645
GO:0009719	response to endogenous stimulus	63	A0A087HNR9, V4LNV9, D7L598, B0ZX82, A0A0D3A1T8, R0I9M8, V4NYR7, A0A078I437, V4KJE9, A0A087HPB5, V4MA11, Q9SFU1, D7MCA9, R0FGI7, A0A087GW30, A0A078DDQ2, R0INE7, D7L0W7, F4HXZ3, A0A087HIQ4, A0A087GS72, V4L5N5, R0GM91, D7L7P4, R0GXB3, R0HP78, A0A087G8C1, O22809, M4F776, A0A087GF69, R0I0R2, V4L1B6, R0FDJ8, A0A087GAY4, A0A087GZ16, D7LUW2, D7LTD9, Q8H6F3, O04603, M4CFM2, V4MBZ6, D7LGB8, O82772, R0F3T4,…	452	0.0554438	0.588645
GO:0005874	microtubule	7	V4L088, V4LLN6, V4LX88, A0A0D3DX99, A0A087GP42, A0A178VTR1, B9DGT7	31	0.0576749	0.588645
GO:0007017	microtubule-based process	7	V4L088, A0A0D3B3D4, V4LLN6, V4KY43, V4LX88, A0A087GP42, B9DGT7	31	0.0576749	0.588645
GO:0009664	plant-type cell wall organization	5	R0GXB3, A0A078JZ04, R0GTD1, A0A078CJJ1, A0A078I3C9	19	0.0583798	0.588645
GO:0010286	heat acclimation	5	D7MM37, V4LR78, A0A068CIP5, V4KMF0, A0A078I437	19	0.0583798	0.588645
GO:0051172	negative regulation of nitrogen compound metabolic process	9	D7M1H6, O78310, A0A087HPU9, P00294, R0I0R2, A0A178VMR4, A0A078E0U6, A0A078C2E1, A9Q115	44	0.0590055	0.588645
GO:0009812	flavonoid metabolic process	8	A0A178UZN6, A0A087HBY0, A0A087HLD0, D7KVC4, A0A087HLA4, A0A0D3DYT6, D7MVE3, Q9LFJ9	38	0.0630775	0.588645
GO:0034599	cellular response to oxidative stress	12	A0A078CT22, O78310, A0A087HLV2, A0A0D3AEV6, V4NC17, V4LZG5, Q8H6F3, V4MSQ9, A0A087HLA4, A9Q115, V4MLG8, A0A178URS6	65	0.0639889	0.588645
GO:0009725	response to hormone	62	A0A087HNR9, V4LNV9, D7L598, B0ZX82, A0A0D3A1T8, R0I9M8, V4NYR7, A0A078I437, V4KJE9, A0A087HPB5, V4MA11, Q9SFU1, D7MCA9, R0FGI7, A0A087GW30, A0A078DDQ2, R0INE7, D7L0W7, F4HXZ3, A0A087HIQ4, A0A087GS72, V4L5N5, R0GM91, D7L7P4, R0GXB3, R0HP78, A0A087G8C1, O22809, M4F776, A0A087GF69, R0I0R2, V4L1B6, R0FDJ8, A0A087GAY4, A0A087GZ16, D7LUW2, D7LTD9, Q8H6F3, O04603, M4CFM2, V4MBZ6, O82772, R0F3T4, D7KVC4,…	448	0.0640785	0.588645
GO:0042221	response to chemical	126	A0A078J089, A0A078FGR2, D7LF25, O04907, D7L598, R0I9M8, V4NYR7, A0A078I437, V4MSQ9, A9Q115, V4KJE9, A0A087HPB5, D7MCA9, E4MXN5, R0FGI7, A0A087GW30, R0INE7, A0A078DDQ2, D7L0W7, M4D1I9, D7MV68, R0GM91, F4K0E8, M4F776, R0FFN4, R0I0R2, V4L1B6, R0GP63, R0FDJ8, A0A087GAY4, B9DGT7, A0A087GZ16, P00294, V4LR78, A0A078CXB7, D7L0J1, M4CFM2, A0A078GNK2, A0A078DVT2, A0A078CT22, D7M4F3, Q39096, A0A087GSM6, R0F…	971	0.0651535	0.588645
GO:0016877	ligase activity, forming carbon-sulfur bonds	9	V4LED1, A0A078IEP9, D7M1P5, D7MH76, Q3E6Y4, V4L4Q7, A0A178VSW7, A0A078HSE9, V4L5N5	45	0.0665925	0.588645
GO:0031327	negative regulation of cellular biosynthetic process	9	D7M1H6, O78310, A0A087HPU9, P00294, R0I0R2, A0A178VMR4, A0A078E0U6, A0A078C2E1, A9Q115	45	0.0665925	0.588645
GO:1901136	carbohydrate derivative catabolic process	9	O82772, A0A078I2G0, A0A078GY33, A0A087G5Q3, A0A087G8C1, A0A178UDK3, D7LYI5, V4LX24, C3S7U7	45	0.0665925	0.588645
GO:0006677	glycosylceramide metabolic process	2	A0A087G5Q3, V4LX24	4	0.0674993	0.588645
GO:0046477	glycosylceramide catabolic process	2	A0A087G5Q3, V4LX24	4	0.0674993	0.588645
GO:0009834	plant-type secondary cell wall biogenesis	2	D7LA42, R0HVT6	4	0.0674993	0.588645
GO:0046479	glycosphingolipid catabolic process	2	A0A087G5Q3, V4LX24	4	0.0674993	0.588645
GO:0006687	glycosphingolipid metabolic process	2	A0A087G5Q3, V4LX24	4	0.0674993	0.588645
GO:0019377	glycolipid catabolic process	2	A0A087G5Q3, V4LX24	4	0.0674993	0.588645
GO:0050284	sinapate 1-glucosyltransferase activity	2	A0A178UZN6, A0A087HBY0	4	0.0674993	0.588645
GO:0010600	regulation of auxin biosynthetic process	2	R0FDJ8, A0A178WJZ1	4	0.0674993	0.588645
GO:0019673	GDP-mannose metabolic process	2	A0A078CAC6, A0A087GWV7	4	0.0674993	0.588645
GO:0033108	mitochondrial respiratory chain complex assembly	2	D7L560, A0A087HCC7	4	0.0674993	0.588645
GO:0046349	amino sugar biosynthetic process	2	A0A087HRZ5, R0HVR1	4	0.0674993	0.588645
GO:0042732	D-xylose metabolic process	2	A0A0D3CVE8, E4MWW0	4	0.0674993	0.588645
GO:0004564	beta-fructofuranosidase activity	2	M4C903, R0GD66	4	0.0674993	0.588645
GO:0004642	phosphoribosylformylglycinamidine synthase activity	2	A0A178WJP3, M4DHE7	4	0.0674993	0.588645
GO:0071457	cellular response to ozone	2	O78310, A9Q115	4	0.0674993	0.588645
GO:0034982	mitochondrial protein processing	2	D7L560, A0A087HCC7	4	0.0674993	0.588645
GO:0006672	ceramide metabolic process	2	A0A087G5Q3, V4LX24	4	0.0674993	0.588645
GO:0006048	UDP-N-acetylglucosamine biosynthetic process	2	A0A087HRZ5, R0HVR1	4	0.0674993	0.588645
GO:0032350	regulation of hormone metabolic process	2	R0FDJ8, A0A178WJZ1	4	0.0674993	0.588645
GO:0003856	3-dehydroquinate synthase activity	2	A0A087GEG9, A0A0D3E2R7	4	0.0674993	0.588645
GO:0046885	regulation of hormone biosynthetic process	2	R0FDJ8, A0A178WJZ1	4	0.0674993	0.588645
GO:0006047	UDP-N-acetylglucosamine metabolic process	2	A0A087HRZ5, R0HVR1	4	0.0674993	0.588645
GO:0046514	ceramide catabolic process	2	A0A087G5Q3, V4LX24	4	0.0674993	0.588645
GO:0004335	galactokinase activity	2	R0I216, V4LAG2	4	0.0674993	0.588645
GO:0004575	sucrose alpha-glucosidase activity	2	M4C903, R0GD66	4	0.0674993	0.588645
GO:0090354	regulation of auxin metabolic process	2	R0FDJ8, A0A178WJZ1	4	0.0674993	0.588645
GO:0033840	NDP-glucose-starch glucosyltransferase activity	2	D7KID6, V4KQF7	4	0.0674993	0.588645
GO:0016903	oxidoreductase activity, acting on the aldehyde or oxo group of donors	13	R0INE7, A0A078J089, D7LHI8, D7M6N1, V4KJE9, V4MA11, A0A0D3C1Q3, O22809, R0F3T4, V4MBI2, V4LAE1, A0A087GZ16, R0GZW2	73	0.0703797	0.588645
GO:0019321	pentose metabolic process	5	V4LKQ8, A0A078FBS2, A0A0D3CVE8, E4MWW0, D7M4H7	20	0.0707771	0.588645
GO:0000323	lytic vacuole	5	E4MW12, E4MWB2, A0A078G6L3, R0HAU6, D7MQ24	20	0.0707771	0.588645
GO:0033037	polysaccharide localization	5	D7LUW2, V4LAQ5, B0ZX82, A0A078JZK8, Q93VW5	20	0.0707771	0.588645
GO:0008202	steroid metabolic process	5	D7LA42, A0A087HPU9, A0A078EVL1, M4ES88, A0A178V9E4	20	0.0707771	0.588645
GO:0019438	aromatic compound biosynthetic process	63	A0A087HRR4, A0A087GEG9, O04907, A0A087HRZ5, A0A078FM14, R0HB18, V4JR39, V4MA11, A0A078BX32, V4MK94, M4F785, A0A078DKD9, D7MDG3, A0A0D3DFZ4, V4L870, A0A178WJP3, D7MNW6, R0GM91, D7LLE8, V4LCV3, O22809, R0I0R2, A0A087GF69, V4L1B6, R0FDJ8, A0A078C2E1, A0A087GAY4, V4LP72, Q8W1M5, R0HVT6, V4MBI2, A0A0D3DYC5, A0A178VZJ5, D7LUW2, D7LTD9, A0A178VMR4, D7L0J1, M4CFM2, D7KLH0, D7M1H6, Q9M591, M4ES88, A0A0D3C…	459	0.0711757	0.588645
GO:0097708	intracellular vesicle	26	A0A178WJ22, A0A087GEG9, D7KS71, V4M8P3, R0I0Y7, R0IMT8, R0GXG8, A0A087GIZ8, D7M3J2, V4K8F1, A0A0D3CVE8, A0A178UZD4, A0A078E6H2, A0A078BVL6, A0A178V0E9, V4M069, R0HNB6, A0A078CJJ1, M4E7B9, A0A178VA82, A0A0D3E2R7, A0A078HC73, Q8H118, A0A178VKB9, R0GQQ8, R0HVT6	169	0.0723731	0.588645
GO:0031410	cytoplasmic vesicle	26	A0A178WJ22, A0A087GEG9, D7KS71, V4M8P3, R0I0Y7, R0IMT8, R0GXG8, A0A087GIZ8, D7M3J2, V4K8F1, A0A0D3CVE8, A0A178UZD4, A0A078E6H2, A0A078BVL6, A0A178V0E9, V4M069, R0HNB6, A0A078CJJ1, M4E7B9, A0A0D3E2R7, A0A078HC73, A0A178VA82, Q8H118, A0A178VKB9, R0GQQ8, R0HVT6	169	0.0723731	0.588645
GO:0015103	inorganic anion transmembrane transporter activity	3	R0EVP1, D7KS71, A0A178UZD4	9	0.0746808	0.588645
GO:0004617	phosphoglycerate dehydrogenase activity	3	O04130, D7M6N1, R0GZW2	9	0.0746808	0.588645
GO:0006775	fat-soluble vitamin metabolic process	3	D7M9P5, V4L870, V4JR39	9	0.0746808	0.588645
GO:0042362	fat-soluble vitamin biosynthetic process	3	D7M9P5, V4L870, V4JR39	9	0.0746808	0.588645
GO:0009311	oligosaccharide metabolic process	9	M4C903, A0A078GAK2, A0A087G5Q3, W8Q789, A0A078JZK8, V4KVI9, A0A078DNP2, V4LX24, V4LDL5	46	0.0747657	0.588645
GO:0005996	monosaccharide metabolic process	18	D7M6Z2, A0A178UZN6, A0A087HBY0, A0A078H0Z9, V4LKQ8, R0GQC1, A0A087HLD0, E4MWW0, A0A0D3DYT6, Q9LFJ9, A0A078FBS2, A0A0D3CVE8, D7MD47, V4KVI9, D7M4H7, A0A087HLA4, D7MVE3, R0I216	110	0.0759261	0.588645
GO:0031982	vesicle	26	A0A178WJ22, A0A087GEG9, D7KS71, V4M8P3, R0I0Y7, R0IMT8, R0GXG8, A0A087GIZ8, D7M3J2, V4K8F1, A0A0D3CVE8, A0A178UZD4, A0A078E6H2, A0A078BVL6, A0A178V0E9, V4M069, R0HNB6, A0A078CJJ1, M4E7B9, A0A178VA82, A0A0D3E2R7, A0A078HC73, Q8H118, R0GQQ8, A0A178VKB9, R0HVT6	170	0.0765676	0.588645
GO:0016620	oxidoreductase activity, acting on the aldehyde or oxo group of donors, NAD or NADP as acceptor	11	R0INE7, V4KJE9, V4MA11, A0A0D3C1Q3, O22809, R0F3T4, D7LHI8, D7M6N1, V4MBI2, A0A087GZ16, R0GZW2	60	0.077219	0.588645
GO:0044264	cellular polysaccharide metabolic process	17	A0A078GAK2, V4JQT7, A0A087H361, A0A078CJJ1, A0A178URS6, D7KLH0, D7KID6, R0GXB3, A0A087GIZ8, V4KQF7, A0A078H9S8, V4KVI9, V4MAN4, M4CNQ7, Q0GPY3, R0HVT6, V4LDL5	103	0.0777444	0.588645
GO:0034614	cellular response to reactive oxygen species	6	O78310, V4NC17, A0A087HLA4, A9Q115, V4MLG8, A0A178URS6	27	0.0813682	0.588645
GO:0008061	chitin binding	4	D7LGB8, A0A078I2G0, A0A078GY33, C3S7U7	15	0.0841277	0.588645
GO:0030244	cellulose biosynthetic process	4	A0A087GIZ8, M4CNQ7, Q0GPY3, R0HVT6	15	0.0841277	0.588645
GO:0042026	protein refolding	5	V4LDY5, A0A078D6A4, V4JWS5, V4LJY9, A0A078DVT2	21	0.0845002	0.588645
GO:0044431	Golgi apparatus part	23	A0A178V0E9, A0A087GEG9, V4M069, D7KS71, A0A0D3DW79, R0HNB6, A0A078CJJ1, V4M8P3, R0I0Y7, R0IMT8, M4E7B9, R0GXG8, A0A087GIZ8, D7M3J2, A0A0D3E2R7, V4K8F1, Q8H118, A0A0D3CVE8, A0A178UZD4, A0A178VKB9, R0GQQ8, R0HVT6, R0FMI3	149	0.0845659	0.588645
GO:0009523	photosystem II	11	A0A087HIW3, A0A078CQS6, D7L7P4, A0A175DDT6, A0A078IAV5, R0FME5, A0A0D3A7X4, A0A075C687, E4MVR1, D7M1Z0, Q6DV58	61	0.0849373	0.588645
GO:0009535	chloroplast thylakoid membrane	50	V4LNN4, V4JR39, A0A078F1W9, A0A078CQS6, R0GPX2, A0A078IAV5, V4M240, R0FGI7, A0A087GW30, V4L870, A0A078CM95, E4MVR1, V4MDD9, Q8LCQ4, D7L7P4, V4NCP4, D7M1Z0, A0A178VQH8, B6EUA5, A0A175DDT6, P00294, A0A087G4X8, Q9M2P7, R0H0T1, A0A087HIW3, A0A178WEF9, R0FG26, A0A087H5C5, A0A078DQF1, V4L7G4, Q9M591, A0A078GMA7, A0A087HNH6, R0GYW8, A0A087GLL4, A0A087H2R7, D7L560, V4M069, A0A087HCC7, A0A178VNU6, A0A078D…	360	0.0852515	0.588645
GO:0055035	plastid thylakoid membrane	50	V4LNN4, V4JR39, A0A078F1W9, A0A078CQS6, R0GPX2, A0A078IAV5, V4M240, R0FGI7, A0A087GW30, V4L870, A0A078CM95, E4MVR1, V4MDD9, Q8LCQ4, D7L7P4, V4NCP4, D7M1Z0, A0A178VQH8, B6EUA5, A0A175DDT6, P00294, A0A087G4X8, Q9M2P7, R0H0T1, A0A087HIW3, A0A178WEF9, R0FG26, A0A087H5C5, A0A078DQF1, V4L7G4, Q9M591, A0A078GMA7, A0A087HNH6, R0GYW8, A0A087GLL4, A0A087H2R7, D7L560, V4M069, A0A087HCC7, A0A178VNU6, A0A078D…	360	0.0852515	0.588645
GO:0006073	cellular glucan metabolic process	16	A0A078GAK2, V4JQT7, A0A087H361, A0A178URS6, D7KLH0, D7KID6, R0GXB3, A0A087GIZ8, V4KQF7, A0A078H9S8, V4KVI9, M4CNQ7, V4MAN4, Q0GPY3, R0HVT6, V4LDL5	97	0.0855565	0.588645
GO:0044042	glucan metabolic process	16	A0A078GAK2, V4JQT7, A0A087H361, A0A178URS6, D7KLH0, D7KID6, R0GXB3, A0A087GIZ8, V4KQF7, A0A078H9S8, V4KVI9, M4CNQ7, V4MAN4, Q0GPY3, R0HVT6, V4LDL5	97	0.0855565	0.588645
GO:0044262	cellular carbohydrate metabolic process	26	M4C903, A0A078GAK2, V4JQT7, A0A087H361, A0A078DNP2, V4MRK7, D7KLH0, A0A087GIZ8, A0A078H9S8, A0A078FBS2, V4MAN4, V4KVI9, M4CNQ7, Q0GPY3, A0A078CJJ1, A0A178URS6, D7KID6, V4LCV3, R0GXB3, V4KQF7, W8Q789, A0A078JZK8, D7MD47, R0HVT6, V4LDL5, R0I216	173	0.0901379	0.588645
GO:0030003	cellular cation homeostasis	9	A0A087FY81, R0EVP1, D7LF25, V4KQ77, A0A078FPP2, R0HB18, A0A178VRQ2, A0A078I437, R0FGI7	48	0.0928825	0.588645
GO:1901658	glycosyl compound catabolic process	6	O82772, A0A087G5Q3, A0A087G8C1, A0A178UDK3, D7LYI5, V4LX24	28	0.0939971	0.588645
GO:0008236	serine-type peptidase activity	14	D7L560, D7MDH0, A0A087HCC7, A0A068CIP5, V4P9U3, A0A0D3DHY5, R0HB45, A0A078GWX8, V4ME30, A0A078G6L3, B9DHR1, Q93ZQ0, R0G8R2, A0A178UZG3	84	0.0964684	0.588645
GO:0017171	serine hydrolase activity	14	D7L560, D7MDH0, A0A087HCC7, A0A0D3DHY5, A0A068CIP5, V4P9U3, R0HB45, A0A078GWX8, V4ME30, A0A078G6L3, B9DHR1, Q93ZQ0, R0G8R2, A0A178UZG3	84	0.0964684	0.588645
GO:0071248	cellular response to metal ion	3	B0ZX82, A0A178URS6, A9Q115	10	0.0978841	0.588645
GO:0010214	seed coat development	3	R0EVU0, A0A078GWX8, V4L5N5	10	0.0978841	0.588645
GO:0071241	cellular response to inorganic substance	3	B0ZX82, A0A178URS6, A9Q115	10	0.0978841	0.588645
GO:0046556	alpha-L-arabinofuranosidase activity	3	V4LKQ8, R0EVU0, D7M4H7	10	0.0978841	0.588645
GO:0009651	response to salt stress	34	B0ZX82, R0HB18, A0A078I437, Q8H6F3, A9Q115, D7LHB8, V4KJE9, O78310, O82772, A0A087GIZ8, D7MCA9, A0A087H5C5, A0A078CSM8, A0A087GZ28, R0INE7, R0FHH9, D7LZA7, D7LJX7, D7L0W7, R0H9Q7, A0A087GS72, A0A087G5W0, D7MQ24, A0A178VRQ2, D7M9X2, A0A087H0R4, R0FFN4, A0A087HLV2, A0A178WJZ1, A0A178VQH8, D8L1V9, A0A087HLA4, B9DGT7, A0A087GZ16	237	0.0987776	0.588645
GO:0016709	oxidoreductase activity, acting on paired donors, with incorporation or reduction of molecular oxygen, NAD(P)H as one donor, and incorporation of one atom of oxygen	5	V5Q698, V4L9M5, Q9M591, Q93VW5, A0A0A0N2Z4	22	0.099512	0.588645
GO:0006972	hyperosmotic response	5	D7M4F3, A0A087GIZ8, A0A078I437, A0A087HLA4, A0A087GZ16	22	0.099512	0.588645
GO:0006970	response to osmotic stress	36	B0ZX82, R0HB18, A0A078I437, Q8H6F3, A9Q115, D7LHB8, V4KJE9, O78310, O82772, D7M4F3, A0A087GIZ8, D7MCA9, A0A087H5C5, A0A078CSM8, A0A087GZ28, R0INE7, D7LZA7, R0FHH9, D7LJX7, D7L0W7, R0H9Q7, A0A087GS72, A0A087G5W0, D7MQ24, A0A178VRQ2, D7M9X2, A0A087H0R4, R0FFN4, V4L1B6, A0A087HLV2, A0A178WJZ1, A0A178VQH8, D8L1V9, A0A087HLA4, B9DGT7, A0A087GZ16	253	0.0999584	0.588645
GO:0010605	negative regulation of macromolecule metabolic process	12	A0A087HPU9, P00294, A0A178VMR4, A0A078E0U6, A9Q115, V4L5K5, D7M1H6, O78310, F4K2G3, R0I0R2, A0A078C2E1, A0A078D3D0	70	0.100313	0.588645
GO:0016042	lipid catabolic process	12	V4P148, D7MD83, D7KJB1, A0A087G5Q3, R0HP78, D7L0W7, V4KPT6, V4ME75, A0A178VA82, V4MN80, V4LNI4, V4LX24	70	0.100313	0.588645
GO:0009892	negative regulation of metabolic process	15	A0A087GW30, Q09GN7, A0A087HPU9, P00294, A0A178VMR4, A0A078E0U6, A9Q115, V4NCV6, V4L5K5, D7M1H6, O78310, F4K2G3, R0I0R2, A0A078C2E1, A0A078D3D0	92	0.101312	0.588645
GO:0001101	response to acid chemical	41	V4LNV9, D7KVA3, A0A078DXE8, A0A078CXB7, B0ZX82, A0A0D3A1T8, V4NYR7, A0A078I437, A0A087H5Y3, A9Q115, V4KJE9, O78310, A0A087HPB5, V4MA11, D7MCA9, Q39096, A0A087GSM6, R0F3T4, V4KC14, V4KCR9, A0A087GGA8, A0A078IRE8, A0A087GW30, R0INE7, R0G6N4, D7L0W7, A0A087HIQ4, R0GXB3, V4KD85, F4K0E8, R0HP78, O22809, M4F776, A0A087G8C1, V4L1B6, A0A078HQA4, D7L3B5, A0A087HLA4, D7LBP2, A0A087GZ16, A0A087HRE3	293	0.101758	0.588645
GO:0052386	cell wall thickening	4	D7LUW2, V4LAQ5, B0ZX82, Q93VW5	16	0.102423	0.588645
GO:0052543	callose deposition in cell wall	4	D7LUW2, V4LAQ5, B0ZX82, Q93VW5	16	0.102423	0.588645
GO:0009081	branched-chain amino acid metabolic process	9	D7LJX7, R0I4D1, D7MNW6, Q8L847, A0A078GH59, A0A087HAZ7, D7MV68, A0A087GZ28, M4DTX0	49	0.102824	0.588645
GO:0051002	ligase activity, forming nitrogen-metal bonds	2	A0A087GF69, C0Z3B5	5	0.104082	0.588645
GO:0008967	phosphoglycolate phosphatase activity	2	M4DLT6, V4N3Q6	5	0.104082	0.588645
GO:0016775	phosphotransferase activity, nitrogenous group as acceptor	2	B0ZX82, A0A126X281	5	0.104082	0.588645
GO:0009825	multidimensional cell growth	2	A0A087HPU9, A0A087GIZ8	5	0.104082	0.588645
GO:0004739	pyruvate dehydrogenase (acetyl-transferring) activity	2	A0A078J089, V4LAE1	5	0.104082	0.588645
GO:0090599	alpha-glucosidase activity	2	M4C903, R0GD66	5	0.104082	0.588645
GO:0009068	aspartate family amino acid catabolic process	2	A0A078CGS5, R0GXU4	5	0.104082	0.588645
GO:0070370	cellular heat acclimation	2	D7MM37, V4KMF0	5	0.104082	0.588645
GO:0009740	gibberellic acid mediated signaling pathway	2	V4LNV9, R0GXB3	5	0.104082	0.588645
GO:0016139	glycoside catabolic process	2	A0A087G5Q3, V4LX24	5	0.104082	0.588645
GO:0000155	phosphorelay sensor kinase activity	2	B0ZX82, A0A126X281	5	0.104082	0.588645
GO:0016851	magnesium chelatase activity	2	A0A087GF69, C0Z3B5	5	0.104082	0.588645
GO:0071493	cellular response to UV-B	2	O78310, A9Q115	5	0.104082	0.588645
GO:0006882	cellular zinc ion homeostasis	2	R0HB18, A0A178VRQ2	5	0.104082	0.588645
GO:0004556	alpha-amylase activity	2	V4MAN4, A0A078HPN4	5	0.104082	0.588645
GO:0005578	proteinaceous extracellular matrix	2	D7M2Y3, R0EVU0	5	0.104082	0.588645
GO:0004673	protein histidine kinase activity	2	B0ZX82, A0A126X281	5	0.104082	0.588645
GO:0051003	ligase activity, forming nitrogen-metal bonds, forming coordination complexes	2	A0A087GF69, C0Z3B5	5	0.104082	0.588645
GO:0016137	glycoside metabolic process	2	A0A087G5Q3, V4LX24	5	0.104082	0.588645
GO:0010033	response to organic substance	70	A0A087HNR9, V4LNV9, D7L598, B0ZX82, A0A0D3A1T8, V4LKH6, R0I9M8, V4NYR7, A0A078I437, A9Q115, V4KJE9, A0A087HPB5, V4MA11, Q9SFU1, D7MCA9, R0FGI7, A0A087GW30, A0A078DDQ2, R0INE7, D7L0W7, F4HXZ3, A0A087HIQ4, A0A087GS72, V4L5N5, R0GM91, D7L7P4, R0GXB3, F4K0E8, R0HP78, A0A087G8C1, O22809, M4F776, A0A087GF69, R0I0R2, V4L1B6, R0FDJ8, A0A087GAY4, A0A087GZ16, D7LUW2, D7LTD9, Q8H6F3, O04603, M4CFM2, V4MBZ6,…	528	0.105118	0.588645
GO:0045934	negative regulation of nucleobase-containing compound metabolic process	6	D7M1H6, A0A087HPU9, R0I0R2, A0A178VMR4, A0A078E0U6, A0A078C2E1	29	0.107612	0.588645
GO:0008652	cellular amino acid biosynthetic process	32	A0A078EJW5, D7LUW2, A0A087HRR4, A0A087GEG9, V4LKH6, A0A078FM14, O04130, A0A078D820, A0A078EGE6, A0A078BX32, Q9SE60, A0A078C9N3, A0A087GZ28, D7LJX7, R0I4D1, A0A087GZ98, D7MNW6, D7MV68, D7M6N1, A0A078CBH7, A0A0D3D1J6, A0A087H276, A0A0D3E2R7, R0FDJ8, A0A087HAZ7, A0A178WJZ1, R0GTW4, Q8W1M5, Q93VW5, A0A178VZJ5, R0GZW2, A0A087GZ16	224	0.111218	0.588645
GO:0044272	sulfur compound biosynthetic process	20	A0A078EJW5, A0A078J089, D7LJX7, M4C9N5, R0I4D1, D7MV68, A0A078CBH7, A0A0A0N2Z4, D7KLH0, A0A178UMQ8, A0A078HKE6, A0A078D820, V5Q698, V4KD85, Q9SE60, V4L1B6, A0A087HAZ7, A0A087GZ28, Q93VW5, V4LAE1	131	0.111401	0.588645
GO:0099080	supramolecular complex	7	V4L088, V4LLN6, V4LX88, A0A0D3DX99, A0A087GP42, A0A178VTR1, B9DGT7	36	0.111656	0.588645
GO:0099513	polymeric cytoskeletal fiber	7	V4L088, V4LLN6, V4LX88, A0A0D3DX99, A0A087GP42, A0A178VTR1, B9DGT7	36	0.111656	0.588645
GO:0099081	supramolecular polymer	7	V4L088, V4LLN6, V4LX88, A0A0D3DX99, A0A087GP42, A0A178VTR1, B9DGT7	36	0.111656	0.588645
GO:0099512	supramolecular fiber	7	V4L088, V4LLN6, V4LX88, A0A0D3DX99, A0A087GP42, A0A178VTR1, B9DGT7	36	0.111656	0.588645
GO:0055080	cation homeostasis	10	A0A087FY81, R0EVP1, P00294, V4KQ77, D7LF25, A0A078FPP2, R0HB18, A0A178VRQ2, A0A078I437, R0FGI7	57	0.112426	0.588645
GO:0006873	cellular ion homeostasis	9	A0A087FY81, R0EVP1, D7LF25, V4KQ77, A0A078FPP2, R0HB18, A0A178VRQ2, A0A078I437, R0FGI7	50	0.113346	0.588645
GO:0031116	positive regulation of microtubule polymerization	1	V4L088	1	0.114858	0.588645
GO:0047724	inosine nucleosidase activity	1	A0A087G8C1	1	0.114858	0.588645
GO:0033520	phytol biosynthetic process	1	V4L870	1	0.114858	0.588645
GO:0072328	alkene binding	1	B0ZX82	1	0.114858	0.588645
GO:0009915	phloem sucrose loading	1	D7M9P5	1	0.114858	0.588645
GO:0000156	phosphorelay response regulator activity	1	B0ZX82	1	0.114858	0.588645
GO:1904965	regulation of vitamin E biosynthetic process	1	V4L870	1	0.114858	0.588645
GO:0008508	bile acid:sodium symporter activity	1	R0FWY6	1	0.114858	0.588645
GO:0006148	inosine catabolic process	1	A0A087G8C1	1	0.114858	0.588645
GO:0044209	AMP salvage	1	V4LCV3	1	0.114858	0.588645
GO:0051182	coenzyme transport	1	D7M8K0	1	0.114858	0.588645
GO:0015125	bile acid transmembrane transporter activity	1	R0FWY6	1	0.114858	0.588645
GO:0000445	THO complex part of transcription export complex	1	R0HNM9	1	0.114858	0.588645
GO:0047622	adenosine nucleosidase activity	1	A0A087G8C1	1	0.114858	0.588645
GO:0048039	ubiquinone binding	1	Q8L847	1	0.114858	0.588645
GO:0004163	diphosphomevalonate decarboxylase activity	1	A0A178V9E4	1	0.114858	0.588645
GO:0046406	magnesium protoporphyrin IX methyltransferase activity	1	A0A0D3DFZ4	1	0.114858	0.588645
GO:0006624	vacuolar protein processing	1	E4MW12	1	0.114858	0.588645
GO:0043783	oxidoreductase activity, oxidizing metal ions with flavin as acceptor	1	Q8L847	1	0.114858	0.588645
GO:2000468	regulation of peroxidase activity	1	A0A178VMR4	1	0.114858	0.588645
GO:0018106	peptidyl-histidine phosphorylation	1	B0ZX82	1	0.114858	0.588645
GO:0034525	1-naphthaldehyde dehydrogenase activity	1	V4MBI2	1	0.114858	0.588645
GO:0003977	UDP-N-acetylglucosamine diphosphorylase activity	1	A0A087HRZ5	1	0.114858	0.588645
GO:0015790	UDP-xylose transport	1	R0GQQ8	1	0.114858	0.588645
GO:0002215	defense response to nematode	1	D7M9X2	1	0.114858	0.588645
GO:0050201	fucokinase activity	1	V4LAG2	1	0.114858	0.588645
GO:0010105	negative regulation of ethylene-activated signaling pathway	1	B0ZX82	1	0.114858	0.588645
GO:0052722	fatty acid in-chain hydroxylase activity	1	V4L9M5	1	0.114858	0.588645
GO:0000347	THO complex	1	R0HNM9	1	0.114858	0.588645
GO:0016107	sesquiterpenoid catabolic process	1	D7L0W7	1	0.114858	0.588645
GO:0080059	flavonol 3-O-arabinosyltransferase activity	1	Q9LFJ9	1	0.114858	0.588645
GO:0009727	detection of ethylene stimulus	1	B0ZX82	1	0.114858	0.588645
GO:0000095	S-adenosyl-L-methionine transmembrane transporter activity	1	D7M8K0	1	0.114858	0.588645
GO:0070298	negative regulation of phosphorelay signal transduction system	1	B0ZX82	1	0.114858	0.588645
GO:0006154	adenosine catabolic process	1	A0A087G8C1	1	0.114858	0.588645
GO:0004151	dihydroorotase activity	1	M4DS51	1	0.114858	0.588645
GO:2000470	positive regulation of peroxidase activity	1	A0A178VMR4	1	0.114858	0.588645
GO:0018202	peptidyl-histidine modification	1	B0ZX82	1	0.114858	0.588645
GO:0051185	coenzyme transporter activity	1	D7M8K0	1	0.114858	0.588645
GO:0072349	modified amino acid transmembrane transporter activity	1	D7M8K0	1	0.114858	0.588645
GO:0003917	DNA topoisomerase type I activity	1	O49571	1	0.114858	0.588645
GO:0035336	long-chain fatty-acyl-CoA metabolic process	1	V4MBI2	1	0.114858	0.588645
GO:0009943	adaxial/abaxial axis specification	1	D7M1H6	1	0.114858	0.588645
GO:0004640	phosphoribosylanthranilate isomerase activity	1	A0A078FM14	1	0.114858	0.588645
GO:0051139	metal ion:proton antiporter activity	1	A0A178VRQ2	1	0.114858	0.588645
GO:0043481	anthocyanin accumulation in tissues in response to UV light	1	D7KLH0	1	0.114858	0.588645
GO:0033721	aldehyde dehydrogenase (NADP+) activity	1	R0F3T4	1	0.114858	0.588645
GO:0015369	calcium:proton antiporter activity	1	A0A178VRQ2	1	0.114858	0.588645
GO:0042352	GDP-L-fucose salvage	1	V4LAG2	1	0.114858	0.588645
GO:0070403	NAD+ binding	1	A0A078EC23	1	0.114858	0.588645
GO:0065001	specification of axis polarity	1	D7M1H6	1	0.114858	0.588645
GO:0017040	ceramidase activity	1	A0A178VXV8	1	0.114858	0.588645
GO:0009918	sterol delta7 reductase activity	1	A0A078EVL1	1	0.114858	0.588645
GO:0043290	apocarotenoid catabolic process	1	D7L0W7	1	0.114858	0.588645
GO:0090308	regulation of methylation-dependent chromatin silencing	1	A0A178VMR4	1	0.114858	0.588645
GO:0006620	posttranslational protein targeting to membrane	1	D7LRR8	1	0.114858	0.588645
GO:0009940	amino-terminal vacuolar sorting propeptide binding	1	A0A178VKB9	1	0.114858	0.588645
GO:0000346	transcription export complex	1	R0HNM9	1	0.114858	0.588645
GO:0035337	fatty-acyl-CoA metabolic process	1	V4MBI2	1	0.114858	0.588645
GO:0018472	1-hydroxy-2-naphthaldehyde dehydrogenase activity	1	V4MBI2	1	0.114858	0.588645
GO:0031221	arabinan metabolic process	1	R0EVU0	1	0.114858	0.588645
GO:0003868	4-hydroxyphenylpyruvate dioxygenase activity	1	M4EUD3	1	0.114858	0.588645
GO:1902932	positive regulation of alcohol biosynthetic process	1	V4L870	1	0.114858	0.588645
GO:0047810	D-alanine:2-oxoglutarate aminotransferase activity	1	D7MNW6	1	0.114858	0.588645
GO:0031204	posttranslational protein targeting to membrane, translocation	1	D7LRR8	1	0.114858	0.588645
GO:0006169	adenosine salvage	1	V4LCV3	1	0.114858	0.588645
GO:0070568	guanylyltransferase activity	1	V4LAG2	1	0.114858	0.588645
GO:0046028	electron transporter, transferring electrons from cytochrome b6/f complex of photosystem II activity	1	P00294	1	0.114858	0.588645
GO:0006849	plasma membrane pyruvate transport	1	R0FWY6	1	0.114858	0.588645
GO:0080019	fatty-acyl-CoA reductase (alcohol-forming) activity	1	V4MBI2	1	0.114858	0.588645
GO:0018475	trans-2-methyl-5-isopropylhexa-2,5-dienal dehydrogenase activity	1	V4MBI2	1	0.114858	0.588645
GO:0043473	pigmentation	1	D7KLH0	1	0.114858	0.588645
GO:0043478	pigment accumulation in response to UV light	1	D7KLH0	1	0.114858	0.588645
GO:0034309	primary alcohol biosynthetic process	1	V4L870	1	0.114858	0.588645
GO:0034822	citronellal dehydrogenase activity	1	V4MBI2	1	0.114858	0.588645
GO:1902553	positive regulation of catalase activity	1	A0A178VMR4	1	0.114858	0.588645
GO:0034601	oxoglutarate dehydrogenase [NAD(P)+] activity	1	V4MBI2	1	0.114858	0.588645
GO:0010152	pollen maturation	1	A0A0D3DX99	1	0.114858	0.588645
GO:0015780	nucleotide-sugar transport	1	R0GQQ8	1	0.114858	0.588645
GO:0016649	oxidoreductase activity, acting on the CH-NH group of donors, quinone or similar compound as acceptor	1	Q8L847	1	0.114858	0.588645
GO:0015165	pyrimidine nucleotide-sugar transmembrane transporter activity	1	R0GQQ8	1	0.114858	0.588645
GO:0033728	divinyl chlorophyllide a 8-vinyl-reductase activity	1	D7LYF5	1	0.114858	0.588645
GO:0010216	maintenance of DNA methylation	1	A0A178VMR4	1	0.114858	0.588645
GO:0043796	glyceraldehyde dehydrogenase (NADP) activity	1	V4MBI2	1	0.114858	0.588645
GO:0043479	pigment accumulation in tissues in response to UV light	1	D7KLH0	1	0.114858	0.588645
GO:0019276	UDP-N-acetylgalactosamine metabolic process	1	A0A087HRZ5	1	0.114858	0.588645
GO:0038199	ethylene receptor activity	1	B0ZX82	1	0.114858	0.588645
GO:0031386	protein tag	1	D7LNM2	1	0.114858	0.588645
GO:0005720	nuclear heterochromatin	1	A0A178VMR4	1	0.114858	0.588645
GO:0034520	2-naphthaldehyde dehydrogenase activity	1	V4MBI2	1	0.114858	0.588645
GO:0034832	geranial dehydrogenase activity	1	V4MBI2	1	0.114858	0.588645
GO:0046345	abscisic acid catabolic process	1	D7L0W7	1	0.114858	0.588645
GO:0015368	calcium:cation antiporter activity	1	A0A178VRQ2	1	0.114858	0.588645
GO:0050614	delta24-sterol reductase activity	1	D7LA42	1	0.114858	0.588645
GO:1904966	positive regulation of vitamin E biosynthetic process	1	V4L870	1	0.114858	0.588645
GO:0035529	NADH pyrophosphatase activity	1	A0A178UUK6	1	0.114858	0.588645
GO:0000169	activation of MAPK activity involved in osmosensory signaling pathway	1	V4L1B6	1	0.114858	0.588645
GO:0043476	pigment accumulation	1	D7KLH0	1	0.114858	0.588645
GO:0019115	benzaldehyde dehydrogenase activity	1	V4MBI2	1	0.114858	0.588645
GO:0042351	'de novo' GDP-L-fucose biosynthetic process	1	A0A087GWV7	1	0.114858	0.588645
GO:0009759	indole glucosinolate biosynthetic process	1	Q93VW5	1	0.114858	0.588645
GO:0045793	positive regulation of cell size	1	D7KLH0	1	0.114858	0.588645
GO:1902532	negative regulation of intracellular signal transduction	1	B0ZX82	1	0.114858	0.588645
GO:0034538	3-methylsalicylaldehyde dehydrogenase activity	1	V4MBI2	1	0.114858	0.588645
GO:0051740	ethylene binding	1	B0ZX82	1	0.114858	0.588645
GO:0004609	phosphatidylserine decarboxylase activity	1	Q0WW96	1	0.114858	0.588645
GO:0034530	4-hydroxymethylsalicyaldehyde dehydrogenase activity	1	V4MBI2	1	0.114858	0.588645
GO:0043878	glyceraldehyde-3-phosphate dehydrogenase (NAD+) (non-phosphorylating) activity	1	V4MBI2	1	0.114858	0.588645
GO:0047746	chlorophyllase activity	1	A0A078E894	1	0.114858	0.588645
GO:0015805	S-adenosyl-L-methionine transport	1	D7M8K0	1	0.114858	0.588645
GO:0070297	regulation of phosphorelay signal transduction system	1	B0ZX82	1	0.114858	0.588645
GO:1902275	regulation of chromatin organization	1	A0A178VMR4	1	0.114858	0.588645
GO:0046086	adenosine biosynthetic process	1	V4LCV3	1	0.114858	0.588645
GO:0018316	peptide cross-linking via L-cystine	1	V4NCV6	1	0.114858	0.588645
GO:0034604	pyruvate dehydrogenase (NAD+) activity	1	V4MBI2	1	0.114858	0.588645
GO:0046136	positive regulation of vitamin metabolic process	1	V4L870	1	0.114858	0.588645
GO:0043745	N2-acetyl-L-aminoadipate semialdehyde dehydrogenase activity	1	V4MBI2	1	0.114858	0.588645
GO:0008696	4-amino-4-deoxychorismate lyase activity	1	D7MNW6	1	0.114858	0.588645
GO:0009976	tocopherol cyclase activity	1	D7M9P5	1	0.114858	0.588645
GO:0005464	UDP-xylose transmembrane transporter activity	1	R0GQQ8	1	0.114858	0.588645
GO:0034603	pyruvate dehydrogenase [NAD(P)+] activity	1	V4MBI2	1	0.114858	0.588645
GO:0003333	amino acid transmembrane transport	1	A0A078HQA4	1	0.114858	0.588645
GO:0046102	inosine metabolic process	1	A0A087G8C1	1	0.114858	0.588645
GO:0043335	protein unfolding	1	R0I6C7	1	0.114858	0.588645
GO:0051365	cellular response to potassium ion starvation	1	M4F776	1	0.114858	0.588645
GO:0047598	7-dehydrocholesterol reductase activity	1	A0A078EVL1	1	0.114858	0.588645
GO:0032260	response to jasmonic acid stimulus involved in jasmonic acid and ethylene-dependent systemic resistance	1	V4KD85	1	0.114858	0.588645
GO:1904964	positive regulation of phytol biosynthetic process	1	V4L870	1	0.114858	0.588645
GO:0031222	arabinan catabolic process	1	R0EVU0	1	0.114858	0.588645
GO:0018473	cis-2-methyl-5-isopropylhexa-2,5-dienal dehydrogenase activity	1	V4MBI2	1	0.114858	0.588645
GO:0090391	granum assembly	1	Q8VY88	1	0.114858	0.588645
GO:0008691	3-hydroxybutyryl-CoA dehydrogenase activity	1	A0A078EC23	1	0.114858	0.588645
GO:0071474	cellular hyperosmotic response	1	A0A087HLA4	1	0.114858	0.588645
GO:1903175	fatty alcohol biosynthetic process	1	V4L870	1	0.114858	0.588645
GO:0015781	pyrimidine nucleotide-sugar transport	1	R0GQQ8	1	0.114858	0.588645
GO:1902551	regulation of catalase activity	1	A0A178VMR4	1	0.114858	0.588645
GO:0046510	UDP-sulfoquinovose:DAG sulfoquinovosyltransferase activity	1	A0A178UMQ8	1	0.114858	0.588645
GO:0050515	4-(cytidine 5'-diphospho)-2-C-methyl-D-erythritol kinase activity	1	D7LFE3	1	0.114858	0.588645
GO:0034425	etioplast envelope	1	A0A078HQA4	1	0.114858	0.588645
GO:0044104	2,5-dioxovalerate dehydrogenase (NAD+) activity	1	V4MBI2	1	0.114858	0.588645
GO:0033044	regulation of chromosome organization	1	A0A178VMR4	1	0.114858	0.588645
GO:0034426	etioplast membrane	1	A0A078HQA4	1	0.114858	0.588645
GO:0018474	2-carboxybenzaldehyde dehydrogenase activity	1	V4MBI2	1	0.114858	0.588645
GO:0009045	xylose isomerase activity	1	E4MWW0	1	0.114858	0.588645
GO:0050486	intramolecular transferase activity, transferring hydroxy groups	1	D7MV68	1	0.114858	0.588645
GO:0052630	UDP-N-acetylgalactosamine diphosphorylase activity	1	A0A087HRZ5	1	0.114858	0.588645
GO:0052814	medium-chain-aldehyde dehydrogenase activity	1	V4MBI2	1	0.114858	0.588645
GO:0052638	indole-3-butyrate beta-glucosyltransferase activity	1	A0A087HLA4	1	0.114858	0.588645
GO:0047341	fucose-1-phosphate guanylyltransferase activity	1	V4LAG2	1	0.114858	0.588645
GO:0032781	positive regulation of ATPase activity	1	A0A0D3B2W2	1	0.114858	0.588645
GO:0071323	cellular response to chitin	1	D7LGB8	1	0.114858	0.588645
GO:0046322	negative regulation of fatty acid oxidation	1	A0A087GW30	1	0.114858	0.588645
GO:0051744	3,8-divinyl protochlorophyllide a 8-vinyl reductase activity	1	D7LYF5	1	0.114858	0.588645
GO:0015692	lead ion transport	1	R0EVP1	1	0.114858	0.588645
GO:0033744	L-methionine:thioredoxin-disulfide S-oxidoreductase activity	1	A0A078CT22	1	0.114858	0.588645
GO:0071475	cellular hyperosmotic salinity response	1	A0A087HLA4	1	0.114858	0.588645
GO:0030797	24-methylenesterol C-methyltransferase activity	1	A0A087HPU9	1	0.114858	0.588645
GO:1904963	regulation of phytol biosynthetic process	1	V4L870	1	0.114858	0.588645
GO:0031205	endoplasmic reticulum Sec complex	1	D7LRR8	1	0.114858	0.588645
GO:0010104	regulation of ethylene-activated signaling pathway	1	B0ZX82	1	0.114858	0.588645
GO:0047918	GDP-mannose 3,5-epimerase activity	1	D7M6Z2	1	0.114858	0.588645
GO:0052636	arabinosyltransferase activity	1	Q9LFJ9	1	0.114858	0.588645
GO:0006616	SRP-dependent cotranslational protein targeting to membrane, translocation	1	D7LRR8	1	0.114858	0.588645
GO:0009944	polarity specification of adaxial/abaxial axis	1	D7M1H6	1	0.114858	0.588645
GO:0010209	vacuolar sorting signal binding	1	A0A178VKB9	1	0.114858	0.588645
GO:0034602	oxoglutarate dehydrogenase (NAD+) activity	1	V4MBI2	1	0.114858	0.588645
GO:0018149	peptide cross-linking	1	V4NCV6	1	0.114858	0.588645
GO:0008716	D-alanine-D-alanine ligase activity	1	A0A178VHR6	1	0.114858	0.588645
GO:0043480	pigment accumulation in tissues	1	D7KLH0	1	0.114858	0.588645
GO:0043870	N-acetyl-gamma-aminoadipyl-phosphate reductase activity	1	V4MBI2	1	0.114858	0.588645
GO:0031935	regulation of chromatin silencing	1	A0A178VMR4	1	0.114858	0.588645
GO:0006999	nuclear pore organization	1	K4FQP4	1	0.114858	0.588645
GO:0004174	electron-transferring-flavoprotein dehydrogenase activity	1	Q8L847	1	0.114858	0.588645
GO:0009615	response to virus	5	E4MYB4, Q9S9N1, M4CB77, D7LAQ2, A0A087G5W0	23	0.115759	0.591125
GO:0008757	S-adenosylmethionine-dependent methyltransferase activity	5	V4L9K1, A0A178V0E9, A0A087HPU9, A0A0D3DFZ4, R0GXG8	23	0.115759	0.591125
GO:0003824	catalytic activity	421	A0A078GAK2, V4P9U3, V4KIC1, A0A078C054, A0A0D3E0J8, V4MSQ9, V4KJE9, V4LAQ5, V4MAN4, M4FD85, A0A0D3DFZ4, V4KKH0, D7MNW6, A0A078E461, A0A078IYT3, R0GFS8, M4E7B9, A0A078I2G0, V4LCV3, F4K0E8, A0A0D3ANS5, D7L6J2, A0A087G4X8, A0A087HLD0, V4JQT7, A0A0D3DX99, V4LS18, A0A0D3BKF7, A0A087H5W2, D7M9P5, V4ME30, A0A0D3C1Q3, M4ES88, R0F3T4, V4MD19, V4JYD6, A0A078IRE8, A0A0D3BD95, A0A078GH59, V4LNI4, R0HNB6, A0A…	3528	0.116175	0.592176
GO:0044459	plasma membrane part	18	A0A078CI95, A0A078G391, V4L2R1, A0A078FK28, M4CF23, V4M8P3, A0A087GIK0, A0A078I437, A0A178UPT8, R0I0Y7, V4LAQ5, D7MPK7, A0A178V3V0, A0A126X281, A0A178VKB9, D7LAQ2, A0A087GGA8, R0FWY6	117	0.119525	0.600628
GO:0006576	cellular biogenic amine metabolic process	6	D7LUW2, R0FDJ8, A0A178WJZ1, A0A078FM14, Q93VW5, A0A178VZJ5	30	0.122181	0.600628
GO:0010193	response to ozone	4	O78310, A0A078DXE8, D7L3B5, A9Q115	17	0.122363	0.600628
GO:0000303	response to superoxide	4	O78310, V4NC17, A9Q115, V4MLG8	17	0.122363	0.600628
GO:0009240	isopentenyl diphosphate biosynthetic process	4	F4K0E8, V4LP72, A0A178V9E4, D7LFE3	17	0.122363	0.600628
GO:0034754	cellular hormone metabolic process	4	O04907, B0ZX82, Q93VW5, A0A0D3DYC5	17	0.122363	0.600628
GO:0005527	macrolide binding	4	R0GFS8, D7MM37, A0A178UA59, V4NDH1	17	0.122363	0.600628
GO:0005528	FK506 binding	4	R0GFS8, D7MM37, A0A178UA59, V4NDH1	17	0.122363	0.600628
GO:0031072	heat shock protein binding	4	A0A078DQF1, A0A178VNU6, A0A178W7K7, M4EUP7	17	0.122363	0.600628
GO:0046490	isopentenyl diphosphate metabolic process	4	F4K0E8, V4LP72, A0A178V9E4, D7LFE3	17	0.122363	0.600628
GO:0019430	removal of superoxide radicals	4	O78310, V4NC17, A9Q115, V4MLG8	17	0.122363	0.600628
GO:0071450	cellular response to oxygen radical	4	O78310, V4NC17, A9Q115, V4MLG8	17	0.122363	0.600628
GO:0071451	cellular response to superoxide	4	O78310, V4NC17, A9Q115, V4MLG8	17	0.122363	0.600628
GO:0005764	lysosome	4	E4MWB2, A0A078G6L3, R0HAU6, D7MQ24	17	0.122363	0.600628
GO:0009067	aspartate family amino acid biosynthetic process	10	A0A078D820, A0A078EJW5, R0I4D1, A0A087GZ98, Q9SE60, D7MNW6, A0A087HAZ7, A0A078C9N3, R0GTW4, A0A078CBH7	58	0.122692	0.600628
GO:0009099	valine biosynthetic process	3	R0I4D1, D7MNW6, A0A087HAZ7	11	0.123565	0.600628
GO:0004784	superoxide dismutase activity	3	O78310, V4NC17, A9Q115	11	0.123565	0.600628
GO:0046467	membrane lipid biosynthetic process	3	A0A178UMQ8, D7M4I1, V4LZG5	11	0.123565	0.600628
GO:0071462	cellular response to water stimulus	3	D7KVA3, V4KC14, A0A087HLA4	11	0.123565	0.600628
GO:0052542	defense response by callose deposition	3	D7LUW2, B0ZX82, Q93VW5	11	0.123565	0.600628
GO:0016721	oxidoreductase activity, acting on superoxide radicals as acceptor	3	O78310, V4NC17, A9Q115	11	0.123565	0.600628
GO:0045735	nutrient reservoir activity	3	R0HB18, A0A078I437, P33524	11	0.123565	0.600628
GO:0006665	sphingolipid metabolic process	3	A0A087G5Q3, A0A178VXV8, V4LX24	11	0.123565	0.600628
GO:0052482	defense response by cell wall thickening	3	D7LUW2, B0ZX82, Q93VW5	11	0.123565	0.600628
GO:0051087	chaperone binding	3	A0A0D3B2W2, F4J8L7, A0A078FN30	11	0.123565	0.600628
GO:0042631	cellular response to water deprivation	3	D7KVA3, V4KC14, A0A087HLA4	11	0.123565	0.600628
GO:0052544	defense response by callose deposition in cell wall	3	D7LUW2, B0ZX82, Q93VW5	11	0.123565	0.600628
GO:0006629	lipid metabolic process	47	V4P148, A0A078DXE8, V4KUK0, A0A078I437, G4WXD8, D7KLH0, D7LFE3, A0A178UMQ8, D7M9P5, D7LA42, V4L9M5, V4ME75, A0A0D2ZX28, M4ES88, D7MH76, V4JYD6, A0A087GW30, Q09GN7, A0A087HPU9, V4L870, D7L0W7, A0A087G5Q3, V4KPT6, A0A078IEP9, A0A087GN96, V4LNI4, A0A178VSW7, V4LX24, A0A078F758, D7MD83, Q570B4, D7KJB1, F4K0E8, R0HP78, A0A178VXV8, A0A178VA82, D7M4I1, V4MN80, A0A078EVL1, Q0WW96, V4LZG5, A0A0D3AG00, A0A…	347	0.126204	0.612405
GO:0055082	cellular chemical homeostasis	11	A0A087FY81, R0EVP1, V4KQ77, D7LF25, D7MD47, A0A078FPP2, R0HB18, A0A178VRQ2, A0A078I437, A0A087GGA8, R0FGI7	66	0.130376	0.631566
GO:0044710	single-organism metabolic process	260	V4P148, A0A078GAK2, A0A087GEG9, A0A078CGS5, Q8L847, V4P9U3, D7L598, A0A087GLU5, V4MSQ9, V4KUK0, A9Q115, A0A078D820, V4KJE9, U5KK11, M4EZ85, R0FGI7, D7LZA7, A0A0D3DFZ4, D7MNW6, A0A087GN96, D7MV68, A0A078CBH7, V4LCV3, F4K0E8, V4MN80, V4L1B6, A0A087GZ16, A0A178UZN6, A0A087G4X8, A0A087HLD0, A0A178VMR4, E4MWW0, D7M9P5, A0A0D3C1Q3, M4ES88, R0F3T4, V4LNY4, V4MD19, A0A087GZ28, A0A078IRE8, V4JYD6, D7M6Z2,…	2142	0.132517	0.635334
GO:0005200	structural constituent of cytoskeleton	5	V4LLN6, V4LX88, D8L1V9, A0A087GP42, B9DGT7	24	0.133175	0.635334
GO:0032269	negative regulation of cellular protein metabolic process	5	V4L5K5, O78310, P00294, A0A078D3D0, A9Q115	24	0.133175	0.635334
GO:1903507	negative regulation of nucleic acid-templated transcription	5	D7M1H6, R0I0R2, A0A178VMR4, A0A078E0U6, A0A078C2E1	24	0.133175	0.635334
GO:1902679	negative regulation of RNA biosynthetic process	5	D7M1H6, R0I0R2, A0A178VMR4, A0A078E0U6, A0A078C2E1	24	0.133175	0.635334
GO:0045892	negative regulation of transcription, DNA-templated	5	D7M1H6, R0I0R2, A0A178VMR4, A0A078E0U6, A0A078C2E1	24	0.133175	0.635334
GO:0005985	sucrose metabolic process	5	M4C903, A0A078GAK2, A0A078JZK8, A0A078DNP2, V4LDL5	24	0.133175	0.635334
GO:0016884	carbon-nitrogen ligase activity, with glutamine as amido-N-donor	5	A0A087HRR4, A0A078I2R1, A0A178WJP3, M4DHE7, A0A0D3DYC5	24	0.133175	0.635334
GO:0051248	negative regulation of protein metabolic process	5	V4L5K5, O78310, P00294, A0A078D3D0, A9Q115	24	0.133175	0.635334
GO:0005506	iron ion binding	14	A0A087FY81, A0A175DDT6, V4KQ77, D7LF25, A0A078FPP2, A0A0A0N2Z4, R0FH68, V5Q698, V4L9M5, F4K0E8, R0G495, U5KK11, Q93VW5, R0FGI7	89	0.13733	0.65125
GO:0044106	cellular amine metabolic process	6	D7LUW2, R0FDJ8, A0A178WJZ1, A0A078FM14, Q93VW5, A0A178VZJ5	31	0.137663	0.65125
GO:0009404	toxin metabolic process	6	D7LHB8, R0IN02, D7KVA3, V4L1B6, V4KC14, A0A087GLU5	31	0.137663	0.65125
GO:0004871	signal transducer activity	8	D7LGB8, A0A087HPB5, V4L1B6, B0ZX82, A0A0D3A1T8, V4NCN6, A0A126X281, D7LAQ2	45	0.138025	0.65125
GO:0051188	cofactor biosynthetic process	22	A0A078J089, V4L870, A0A0D3DFZ4, A0A078EKR3, M4C9N5, V4NHK7, D7MNW6, A0A078DKU7, V4JR39, M4CFM2, D7KLH0, R0GM91, A0A078HKE6, A0A087GF69, M4F785, Q9M591, A0A0D3EGS7, D7LYF5, A0A087GAY4, V4LP72, Q9S7A3, V4LAE1	151	0.142177	0.65125
GO:0000305	response to oxygen radical	4	O78310, V4NC17, A9Q115, V4MLG8	18	0.143801	0.65125
GO:0071369	cellular response to ethylene stimulus	4	B0ZX82, V4MBZ6, C3S7U7, A0A178URS6	18	0.143801	0.65125
GO:0042538	hyperosmotic salinity response	4	A0A087GIZ8, A0A078I437, A0A087HLA4, A0A087GZ16	18	0.143801	0.65125
GO:0004088	carbamoyl-phosphate synthase (glutamine-hydrolyzing) activity	2	A0A087HRR4, A0A078I2R1	6	0.144569	0.65125
GO:0004650	polygalacturonase activity	2	A0A078JFX0, A0A087GYR5	6	0.144569	0.65125
GO:0030149	sphingolipid catabolic process	2	A0A087G5Q3, V4LX24	6	0.144569	0.65125
GO:0004072	aspartate kinase activity	2	A0A078EJW5, R0GTW4	6	0.144569	0.65125
GO:0052692	raffinose alpha-galactosidase activity	2	A0A087G5Q3, V4LX24	6	0.144569	0.65125
GO:0003871	5-methyltetrahydropteroyltriglutamate-homocysteine S-methyltransferase activity	2	A0A078D820, A0A078CBH7	6	0.144569	0.65125
GO:0051117	ATPase binding	2	V4MRV7, R0HB18	6	0.144569	0.65125
GO:0004675	transmembrane receptor protein serine/threonine kinase activity	2	D7LGB8, A0A0D3A1T8	6	0.144569	0.65125
GO:0009164	nucleoside catabolic process	2	A0A087G8C1, D7LYI5	6	0.144569	0.65125
GO:0004017	adenylate kinase activity	2	A0A087GLL4, F4JYC0	6	0.144569	0.65125
GO:0009011	starch synthase activity	2	D7KID6, V4KQF7	6	0.144569	0.65125
GO:0008810	cellulase activity	2	A0A078H9S8, V4JQT7	6	0.144569	0.65125
GO:0004707	MAP kinase activity	2	A0A087HPB5, V4L1B6	6	0.144569	0.65125
GO:0055069	zinc ion homeostasis	2	R0HB18, A0A178VRQ2	6	0.144569	0.65125
GO:0006152	purine nucleoside catabolic process	2	A0A087G8C1, D7LYI5	6	0.144569	0.65125
GO:0031012	extracellular matrix	2	D7M2Y3, R0EVU0	6	0.144569	0.65125
GO:0046352	disaccharide catabolic process	2	M4C903, V4KVI9	6	0.144569	0.65125
GO:0009833	plant-type primary cell wall biogenesis	2	A0A087GIZ8, R0HVT6	6	0.144569	0.65125
GO:0042085	5-methyltetrahydropteroyltri-L-glutamate-dependent methyltransferase activity	2	A0A078D820, A0A078CBH7	6	0.144569	0.65125
GO:0016799	hydrolase activity, hydrolyzing N-glycosyl compounds	2	A0A087G8C1, D7LYI5	6	0.144569	0.65125
GO:0004557	alpha-galactosidase activity	2	A0A087G5Q3, V4LX24	6	0.144569	0.65125
GO:0071484	cellular response to light intensity	2	O78310, A9Q115	6	0.144569	0.65125
GO:0009313	oligosaccharide catabolic process	2	M4C903, V4KVI9	6	0.144569	0.65125
GO:0034644	cellular response to UV	2	O78310, A9Q115	6	0.144569	0.65125
GO:0003988	acetyl-CoA C-acyltransferase activity	2	R0HP78, V4KPT6	6	0.144569	0.65125
GO:0046466	membrane lipid catabolic process	2	A0A087G5Q3, V4LX24	6	0.144569	0.65125
GO:0046373	L-arabinose metabolic process	2	V4LKQ8, D7M4H7	6	0.144569	0.65125
GO:0006032	chitin catabolic process	3	A0A078I2G0, A0A078GY33, C3S7U7	12	0.151356	0.663225
GO:1901072	glucosamine-containing compound catabolic process	3	A0A078I2G0, A0A078GY33, C3S7U7	12	0.151356	0.663225
GO:0006030	chitin metabolic process	3	A0A078I2G0, A0A078GY33, C3S7U7	12	0.151356	0.663225
GO:0046348	amino sugar catabolic process	3	A0A078I2G0, A0A078GY33, C3S7U7	12	0.151356	0.663225
GO:0006026	aminoglycan catabolic process	3	A0A078I2G0, A0A078GY33, C3S7U7	12	0.151356	0.663225
GO:0016844	strictosidine synthase activity	3	D7LVM4, V4KKH0, A0A178WA54	12	0.151356	0.663225
GO:0016160	amylase activity	3	A0A078HWY0, V4MAN4, A0A078HPN4	12	0.151356	0.663225
GO:0009684	indoleacetic acid biosynthetic process	3	O04907, Q93VW5, A0A0D3DYC5	12	0.151356	0.663225
GO:0006022	aminoglycan metabolic process	3	A0A078I2G0, A0A078GY33, C3S7U7	12	0.151356	0.663225
GO:0009683	indoleacetic acid metabolic process	3	O04907, Q93VW5, A0A0D3DYC5	12	0.151356	0.663225
GO:0009501	amyloplast	3	D7KID6, V4KQF7, V4KVI9	12	0.151356	0.663225
GO:1901071	glucosamine-containing compound metabolic process	3	A0A078I2G0, A0A078GY33, C3S7U7	12	0.151356	0.663225
GO:0006783	heme biosynthetic process	3	A0A078EKR3, V4NHK7, M4F785	12	0.151356	0.663225
GO:0009744	response to sucrose	5	V4NCV6, O78310, A0A078HQA4, V4LKH6, A9Q115	25	0.151681	0.663225
GO:0046835	carbohydrate phosphorylation	5	V4LCV3, A0A078FBS2, D7MD47, V4MRK7, R0I216	25	0.151681	0.663225
GO:0051253	negative regulation of RNA metabolic process	5	D7M1H6, R0I0R2, A0A178VMR4, A0A078E0U6, A0A078C2E1	25	0.151681	0.663225
GO:0006637	acyl-CoA metabolic process	5	A0A078J089, V4MBI2, A0A178V9E4, V4LAE1, D7KLH0	25	0.151681	0.663225
GO:0035383	thioester metabolic process	5	A0A078J089, V4MBI2, A0A178V9E4, V4LAE1, D7KLH0	25	0.151681	0.663225
GO:0034285	response to disaccharide	5	V4NCV6, O78310, A0A078HQA4, V4LKH6, A9Q115	25	0.151681	0.663225
GO:0019395	fatty acid oxidation	7	A0A087GW30, V4P148, V4L9M5, R0HP78, V4KPT6, V4MN80, V4LNI4	39	0.153472	0.670018
GO:0020037	heme binding	17	V4NQW9, K7ZW05, A0A175DDT6, R0GTD1, Q9SHG8, Q8H6F3, A0A0A0N2Z4, V5Q698, V4L9M5, R0I486, R0G495, A0A087HLV2, A0A0D3AEV6, A0A087H3J5, U5KK11, M4EZ85, Q93VW5	114	0.156055	0.680247
GO:0098771	inorganic ion homeostasis	10	A0A087FY81, R0EVP1, P00294, V4KQ77, D7LF25, A0A078FPP2, R0HB18, A0A178VRQ2, A0A078I437, R0FGI7	61	0.15642	0.680788
GO:0009066	aspartate family amino acid metabolic process	12	A0A078EJW5, A0A078CGS5, R0I4D1, A0A087GZ98, D7MNW6, A0A078CBH7, A0A078D820, Q9SE60, A0A087HAZ7, A0A078C9N3, R0GTW4, R0GXU4	76	0.157335	0.683718
GO:0018130	heterocycle biosynthetic process	58	A0A087HRR4, O04907, A0A087HRZ5, A0A078FM14, R0HB18, V4JR39, M4DS51, V4MK94, M4F785, A0A078DKD9, D7MDG3, A0A0D3DFZ4, V4L870, A0A178WJP3, D7MNW6, R0GM91, D7LLE8, V4LCV3, R0I0R2, A0A087GF69, V4L1B6, R0FDJ8, A0A078C2E1, A0A087GAY4, V4LP72, A0A0D3DYC5, A0A087GZ16, A0A178VZJ5, D7LUW2, D7LTD9, A0A078I2R1, A0A178VMR4, D7L0J1, M4CFM2, D7KLH0, D7M9P5, D7M1H6, Q9M591, A0A0D3CVE8, D7LYF5, A0A178W7K7, Q9S7A3,…	444	0.157887	0.684469
GO:0016053	organic acid biosynthetic process	47	A0A078EJW5, A0A087HRR4, D7LUW2, A0A087GEG9, O04907, A0A078DXE8, V4LKH6, A0A078FM14, V4L4Q7, V4KUK0, G4WXD8, D7KLH0, O04130, A0A078EGE6, A0A078D820, A0A078BX32, Q9SE60, D7MH76, A0A078C9N3, A0A087GZ28, D7M6Z2, Q09GN7, D7LJX7, R0I4D1, A0A087GZ98, D7MNW6, A0A078IEP9, D7MV68, D7M6N1, A0A078CBH7, A0A178VSW7, A0A087H276, A0A0D3D1J6, A0A078F758, Q570B4, R0HP78, A0A0D3E2R7, R0FDJ8, A0A087HAZ7, A0A178WJZ1,…	354	0.158234	0.684469
GO:0046394	carboxylic acid biosynthetic process	47	A0A078EJW5, A0A087HRR4, D7LUW2, A0A087GEG9, O04907, A0A078DXE8, V4LKH6, A0A078FM14, V4L4Q7, V4KUK0, G4WXD8, D7KLH0, O04130, A0A078EGE6, A0A078D820, A0A078BX32, Q9SE60, D7MH76, A0A078C9N3, A0A087GZ28, D7M6Z2, Q09GN7, D7LJX7, R0I4D1, A0A087GZ98, D7MNW6, A0A078IEP9, D7MV68, D7M6N1, A0A078CBH7, A0A178VSW7, A0A087H276, A0A0D3D1J6, A0A078F758, Q570B4, R0HP78, A0A0D3E2R7, R0FDJ8, A0A087HAZ7, A0A178WJZ1,…	354	0.158234	0.684469
GO:0016836	hydro-lyase activity	15	D7LUW2, A0A087GWV7, A0A078EKR3, D7LJX7, O04907, D7MV68, A0A087H276, A0A078EGE6, A0A078CAC6, V4MN80, M4F785, A0A0D3CVE8, D7KVC4, A0A087GZ28, A0A078HTC6	99	0.159474	0.688782
GO:0010629	negative regulation of gene expression	9	D7M1H6, O78310, P00294, F4K2G3, R0I0R2, A0A178VMR4, A0A078E0U6, A0A078C2E1, A9Q115	54	0.161013	0.689851
GO:0072329	monocarboxylic acid catabolic process	8	V4P148, R0HP78, D7L0W7, V4KPT6, V4MN80, V4LNI4, D7M6N1, R0GZW2	47	0.165253	0.689851
GO:0044242	cellular lipid catabolic process	8	V4P148, A0A087G5Q3, R0HP78, D7L0W7, V4KPT6, V4MN80, V4LNI4, V4LX24	47	0.165253	0.689851
GO:0004180	carboxypeptidase activity	4	V4ME30, A0A078G6L3, V4P9U3, B9DHR1	19	0.16658	0.689851
GO:0019205	nucleobase-containing compound kinase activity	4	R0GXD7, A0A087GLL4, V4LCV3, F4JYC0	19	0.16658	0.689851
GO:0006084	acetyl-CoA metabolic process	4	A0A078J089, A0A178V9E4, V4LAE1, D7KLH0	19	0.16658	0.689851
GO:0044092	negative regulation of molecular function	7	R0GVN4, V4L5K5, V4LT85, A0A078GRZ7, A0A126X281, A0A078D3D0, Q9FFE0	40	0.168823	0.689851
GO:0019200	carbohydrate kinase activity	6	V4LCV3, A0A078FBS2, D7MD47, V4MRK7, R0I216, V4LAG2	33	0.171162	0.689851
GO:0044247	cellular polysaccharide catabolic process	5	A0A078H9S8, V4JQT7, V4MAN4, V4KVI9, A0A178URS6	26	0.171189	0.689851
GO:0009251	glucan catabolic process	5	A0A078H9S8, V4JQT7, V4MAN4, V4KVI9, A0A178URS6	26	0.171189	0.689851
GO:0060589	nucleoside-triphosphatase regulator activity	5	A0A0D3B2W2, F4J8L7, A0A078FN30, R0H9Q7, A0A178VP87	26	0.171189	0.689851
GO:0009527	plastid outer membrane	5	V4KXJ0, D7LZA0, V4NCP4, A0A078HQA4, A0A078DKU7	26	0.171189	0.689851
GO:0009707	chloroplast outer membrane	5	V4KXJ0, D7LZA0, V4NCP4, A0A078HQA4, A0A078DKU7	26	0.171189	0.689851
GO:0051539	4 iron, 4 sulfur cluster binding	8	A0A078EGE6, V4NQW9, F4K0E8, A0A178UNP1, Q8L847, D7MV68, M4EZ85, A0A087H276	48	0.179727	0.689851
GO:0004252	serine-type endopeptidase activity	8	D7L560, D7MDH0, A0A087HCC7, A0A068CIP5, R0HB45, A0A078GWX8, R0G8R2, A0A178UZG3	48	0.179727	0.689851
GO:1900750	oligopeptide binding	3	D7LHB8, D7KVA3, V4KC14	13	0.180884	0.689851
GO:0019856	pyrimidine nucleobase biosynthetic process	3	M4DS51, R0GXD7, A0A078I2R1	13	0.180884	0.689851
GO:0004130	cytochrome-c peroxidase activity	3	A0A087HLV2, A0A0D3AEV6, Q8H6F3	13	0.180884	0.689851
GO:0017148	negative regulation of translation	3	O78310, P00294, A9Q115	13	0.180884	0.689851
GO:0016688	L-ascorbate peroxidase activity	3	A0A087HLV2, A0A0D3AEV6, Q8H6F3	13	0.180884	0.689851
GO:0034249	negative regulation of cellular amide metabolic process	3	O78310, P00294, A9Q115	13	0.180884	0.689851
GO:0042168	heme metabolic process	3	A0A078EKR3, V4NHK7, M4F785	13	0.180884	0.689851
GO:0043295	glutathione binding	3	D7LHB8, D7KVA3, V4KC14	13	0.180884	0.689851
GO:0004568	chitinase activity	3	A0A078I2G0, A0A078GY33, C3S7U7	13	0.180884	0.689851
GO:0048523	negative regulation of cellular process	16	A0A087GW30, Q09GN7, A0A078I0U0, A0A087HPU9, P00294, B0ZX82, A0A178VMR4, A0A078E0U6, A9Q115, V4NCV6, V4L5K5, D7M1H6, O78310, R0I0R2, A0A078C2E1, A0A078D3D0	109	0.181098	0.689851
GO:0010038	response to metal ion	44	R0EVP1, A0A078FGR2, A0A078J089, D7KVA3, P00294, D7LF25, V4LED1, O04907, B0ZX82, A0A078FPP2, Q8H6F3, D7L0J1, A0A078DVT2, A9Q115, O78310, V4MA11, A0A087H5C5, V4KC14, R0FGI7, C3S7U7, A0A087FY81, R0FYX9, D7KN61, A0A078H0Z9, M4D1I9, M4CB77, O80889, A0A178VP87, D7MV68, V4LX88, D7M6N1, A0A087GS72, A0A087G5W0, V4L5N5, A0A178URS6, R0IN02, O22809, R0FFN4, A0A087HLV2, R0GP63, A0A178VQH8, A0A078HSE9, B9DGT7,…	334	0.181604	0.689851
GO:0005984	disaccharide metabolic process	7	M4C903, A0A078GAK2, W8Q789, A0A078JZK8, V4KVI9, A0A078DNP2, V4LDL5	41	0.184817	0.689851
GO:0009753	response to jasmonic acid	7	A0A087HPB5, V4KD85, A0A087G8C1, A0A078HQA4, V4NYR7, A0A078IRE8, A0A087HRE3	41	0.184817	0.689851
GO:0009308	amine metabolic process	7	D7LUW2, R0FDJ8, B0ZX82, A0A178WJZ1, A0A078FM14, Q93VW5, A0A178VZJ5	41	0.184817	0.689851
GO:0009605	response to external stimulus	49	A0A087HRR4, D7KVA3, O04907, A0A078DXE8, B0ZX82, A0A087GLU5, R0HB18, A0A087H5Y3, A9Q115, D7LHB8, A0A078BX32, A0A126X281, R0G1S4, D7LAQ2, E4MXN5, R0FGI7, A0A0A0N2Z4, V4L5N5, F4K0E8, A0A178VA82, M4F776, V4L1B6, R0FDJ8, R0EVP1, D7LUW2, Q42335, Q8H6J9, D7KLH0, A0A178UMQ8, E4MYB4, A0A178VY01, Q39096, V4KC14, R0GQT4, C3S7U7, V4LT85, R0FHH9, M4CB77, A0A087G5W0, D7M9X2, A0A087GKB9, A0A0D3BRZ5, A0A078GRJ1,…	376	0.186788	0.689851
GO:0019566	arabinose metabolic process	2	V4LKQ8, D7M4H7	7	0.187582	0.689851
GO:0009317	acetyl-CoA carboxylase complex	2	V4KUK0, G4WXD8	7	0.187582	0.689851
GO:0010196	nonphotochemical quenching	2	V4MEL6, E4MVR1	7	0.187582	0.689851
GO:0071281	cellular response to iron ion	2	B0ZX82, A0A178URS6	7	0.187582	0.689851
GO:0071370	cellular response to gibberellin stimulus	2	V4LNV9, R0GXB3	7	0.187582	0.689851
GO:0017119	Golgi transport complex	2	R0I0Y7, A0A178VKB9	7	0.187582	0.689851
GO:0019199	transmembrane receptor protein kinase activity	2	D7LGB8, A0A0D3A1T8	7	0.187582	0.689851
GO:0048831	regulation of shoot system development	2	D7KLH0, D7LBP2	7	0.187582	0.689851
GO:0009044	xylan 1,4-beta-xylosidase activity	2	D7M2Y3, R0EVU0	7	0.187582	0.689851
GO:0009247	glycolipid biosynthetic process	2	A0A178UMQ8, D7M4I1	7	0.187582	0.689851
GO:0006086	acetyl-CoA biosynthetic process from pyruvate	2	A0A078J089, V4LAE1	7	0.187582	0.689851
GO:0016207	4-coumarate-CoA ligase activity	2	Q3E6Y4, V4L4Q7	7	0.187582	0.689851
GO:0045814	negative regulation of gene expression, epigenetic	2	A0A178VMR4, A0A078E0U6	7	0.187582	0.689851
GO:0055083	monovalent inorganic anion homeostasis	2	A0A078I437, A0A178VRQ2	7	0.187582	0.689851
GO:0050665	hydrogen peroxide biosynthetic process	2	D7M4I1, B0ZX82	7	0.187582	0.689851
GO:0000165	MAPK cascade	2	A0A087HPB5, V4L1B6	7	0.187582	0.689851
GO:1902531	regulation of intracellular signal transduction	2	V4L1B6, B0ZX82	7	0.187582	0.689851
GO:1990066	energy quenching	2	V4MEL6, E4MVR1	7	0.187582	0.689851
GO:0009909	regulation of flower development	2	D7KLH0, D7LBP2	7	0.187582	0.689851
GO:0010476	gibberellin mediated signaling pathway	2	V4LNV9, R0GXB3	7	0.187582	0.689851
GO:0006342	chromatin silencing	2	A0A178VMR4, A0A078E0U6	7	0.187582	0.689851
GO:0004802	transketolase activity	2	A0A087H5C5, A0A178VQH8	7	0.187582	0.689851
GO:0044275	cellular carbohydrate catabolic process	6	M4C903, A0A078H9S8, V4JQT7, V4MAN4, V4KVI9, A0A178URS6	34	0.189065	0.689851
GO:0030665	clathrin-coated vesicle membrane	4	R0I0Y7, A0A178WJ22, A0A178VKB9, V4M8P3	20	0.190531	0.689851
GO:0009741	response to brassinosteroid	4	R0GXB3, A0A0D3A1T8, A0A087HIQ4, V4KCR9	20	0.190531	0.689851
GO:0008144	drug binding	4	R0GFS8, D7MM37, A0A178UA59, V4NDH1	20	0.190531	0.689851
GO:0051274	beta-glucan biosynthetic process	4	A0A087GIZ8, M4CNQ7, Q0GPY3, R0HVT6	20	0.190531	0.689851
GO:0038023	signaling receptor activity	4	D7LGB8, B0ZX82, A0A0D3A1T8, A0A126X281	20	0.190531	0.689851
GO:0015925	galactosidase activity	4	A0A087G5Q3, V4KIC1, A0A078JUU3, V4LX24	20	0.190531	0.689851
GO:0009407	toxin catabolic process	5	D7LHB8, R0IN02, D7KVA3, V4KC14, A0A087GLU5	27	0.191603	0.689851
GO:0090487	secondary metabolite catabolic process	5	D7LHB8, R0IN02, D7KVA3, V4KC14, A0A087GLU5	27	0.191603	0.689851
GO:0031224	intrinsic component of membrane	136	Q2V606, D7KS71, Q8L847, A0A0D3CQQ6, V4L2K1, R0HB18, A0A078F1W9, V4L4G1, A0A087GRA1, R0IMT8, R0GXG8, D7M3J2, V4L6K8, D7MPK7, V4LAQ5, D7LAQ2, R0FWY6, M4FD85, Q09GN7, M4CXQ8, D7LZA7, E4MVR1, A0A178W0Q2, V4MDD9, D7LRR8, A0A087HR60, A0A078H0N6, Q8LCQ4, V4NCP4, M4F776, D7M8K0, Q8H118, A0A087HBX3, R0GQQ8, M4CWP3, R0GVN4, A0A175DDT6, D7L7X0, V4JQT7, V4KII7, A0A078DGF1, A0A0D3BKF7, A0A078GNK2, A0A087GIZ8,…	1107	0.193053	0.689851
GO:0015630	microtubule cytoskeleton	8	V4L088, R0H9Q7, V4LLN6, V4LX88, A0A0D3DX99, A0A087GP42, A0A178VTR1, B9DGT7	49	0.194732	0.689851
GO:0052689	carboxylic ester hydrolase activity	12	R0GVN4, D7MD83, V4LT85, D7KJB1, F4J9L0, A0A078GRZ7, A0A087H5E9, B2CXV5, A0A087G8N1, A0A078E894, A0A178VBF6, D7LQI9	80	0.202884	0.689851
GO:0009082	branched-chain amino acid biosynthetic process	6	D7LJX7, R0I4D1, D7MNW6, A0A087HAZ7, D7MV68, A0A087GZ28	35	0.20765	0.689851
GO:0051082	unfolded protein binding	14	A0A078EDM1, Q9SIL3, A0A178VNU6, V4KII7, R0G9G5, A0A087G5W0, A0A078DVT2, A0A078GRJ1, V4LDY5, D7M4F3, V4MHV1, A0A078DQF1, V4LJY9, E4MXN5	96	0.208086	0.689851
GO:0044723	single-organism carbohydrate metabolic process	44	M4C903, A0A178UZN6, A0A078GAK2, A0A078J089, A0A087HBY0, A0A087HLD0, A0A078DNP2, E4MWW0, A0A0D3DYT6, Q9LFJ9, D7KLH0, A0A087GIZ8, A0A087H5C5, A0A078FBS2, A0A0D3CVE8, V4KVI9, M4CNQ7, Q0GPY3, D7M4H7, R0FMI3, D7MVE3, V4LAE1, D7M6Z2, A0A087G5Q3, V4LKQ8, R0GQC1, V4M069, A0A078H0Z9, R0HNB6, A0A078CJJ1, A0A087GS72, V4LX24, D7KID6, V4NCV6, V4KQF7, R0EVU0, W8Q789, A0A078JZK8, D7MD47, A0A178VQH8, R0HVT6, A0A…	339	0.210161	0.689851
GO:0072341	modified amino acid binding	3	D7LHB8, D7KVA3, V4KC14	14	0.211779	0.689851
GO:0016125	sterol metabolic process	3	A0A087HPU9, A0A078EVL1, A0A178V9E4	14	0.211779	0.689851
GO:0010224	response to UV-B	3	O78310, V4L1B6, A9Q115	14	0.211779	0.689851
GO:0010410	hemicellulose metabolic process	3	R0GXB3, R0EVU0, A0A087H361	14	0.211779	0.689851
GO:0016843	amine-lyase activity	3	D7LVM4, V4KKH0, A0A178WA54	14	0.211779	0.689851
GO:0009269	response to desiccation	3	R0INE7, V4KJE9, A0A087GSM6	14	0.211779	0.689851
GO:0051707	response to other organism	38	R0EVP1, D7LUW2, O04907, A0A078DXE8, B0ZX82, Q42335, A0A087GLU5, Q8H6J9, A0A087H5Y3, A9Q115, D7LHB8, E4MYB4, A0A178VY01, A0A078BX32, Q39096, R0GQT4, D7LAQ2, E4MXN5, R0FGI7, C3S7U7, V4LT85, R0FHH9, M4CB77, A0A087G5W0, D7M9X2, A0A0A0N2Z4, V4L5N5, A0A087GKB9, A0A0D3BRZ5, A0A078GRJ1, Q9S9N1, V4KD85, F4K0E8, V4L1B6, R0FDJ8, A0A178WJZ1, Q93VW5, D7L3B5	290	0.212378	0.689851
GO:0009808	lignin metabolic process	5	D7LA42, V4MA11, O22809, M4ES88, R0HVT6	28	0.212822	0.689851
GO:0016811	hydrolase activity, acting on carbon-nitrogen (but not peptide) bonds, in linear amides	5	R0FH68, D7M1H6, A0A178VXV8, V4MD19, A0A0D3DYC5	28	0.212822	0.689851
GO:0000139	Golgi membrane	12	R0I0Y7, R0IMT8, D7M3J2, V4M069, V4K8F1, Q8H118, A0A0D3CVE8, R0HNB6, A0A078CJJ1, A0A178VKB9, R0GQQ8, R0FMI3	81	0.215104	0.689851
GO:0046451	diaminopimelate metabolic process	4	A0A078EJW5, A0A087GZ98, A0A078C9N3, R0GTW4	21	0.215479	0.689851
GO:0071322	cellular response to carbohydrate stimulus	4	O78310, B0ZX82, D7MD47, A9Q115	21	0.215479	0.689851
GO:0009085	lysine biosynthetic process	4	A0A078EJW5, A0A087GZ98, A0A078C9N3, R0GTW4	21	0.215479	0.689851
GO:0009089	lysine biosynthetic process via diaminopimelate	4	A0A078EJW5, A0A087GZ98, A0A078C9N3, R0GTW4	21	0.215479	0.689851
GO:0009705	plant-type vacuole membrane	4	A0A087HBX3, R0G1S4, R0HB18, A0A178VRQ2	21	0.215479	0.689851
GO:0006801	superoxide metabolic process	4	O78310, V4NC17, A9Q115, V4MLG8	21	0.215479	0.689851
GO:0010383	cell wall polysaccharide metabolic process	4	R0GXB3, R0EVU0, A0A087H361, A0A078CJJ1	21	0.215479	0.689851
GO:0010114	response to red light	4	Q8LCQ4, D7L7P4, D8L1V9, Q93VW5	21	0.215479	0.689851
GO:0009607	response to biotic stimulus	40	A0A087HQR6, R0EVP1, D7LUW2, O04907, A0A078DXE8, B0ZX82, Q42335, A0A087GLU5, Q8H6J9, A0A087H5Y3, A9Q115, D7LHB8, E4MYB4, A0A178VY01, A0A078BX32, Q39096, R0GQT4, D7LAQ2, E4MXN5, R0FGI7, C3S7U7, A0A078FYL7, V4LT85, R0FHH9, M4CB77, A0A087G5W0, D7M9X2, A0A0A0N2Z4, V4L5N5, A0A087GKB9, A0A0D3BRZ5, A0A078GRJ1, Q9S9N1, V4KD85, F4K0E8, V4L1B6, R0FDJ8, A0A178WJZ1, Q93VW5, D7L3B5	307	0.215968	0.689851
GO:0005688	U6 snRNP	1	A0A078FPL4	2	0.216539	0.689851
GO:0045786	negative regulation of cell cycle	1	A0A087HPU9	2	0.216539	0.689851
GO:1903960	negative regulation of anion transmembrane transport	1	A0A126X281	2	0.216539	0.689851
GO:0016453	C-acetyltransferase activity	1	V4KPT6	2	0.216539	0.689851
GO:0006346	methylation-dependent chromatin silencing	1	A0A178VMR4	2	0.216539	0.689851
GO:0010232	vascular transport	1	D7M9P5	2	0.216539	0.689851
GO:0035970	peptidyl-threonine dephosphorylation	1	O64730	2	0.216539	0.689851
GO:0031113	regulation of microtubule polymerization	1	V4L088	2	0.216539	0.689851
GO:0016102	diterpenoid biosynthetic process	1	V4L870	2	0.216539	0.689851
GO:0015770	sucrose transport	1	D7M9P5	2	0.216539	0.689851
GO:0004817	cysteine-tRNA ligase activity	1	A0A078FCY8	2	0.216539	0.689851
GO:0001872	(1->3)-beta-D-glucan binding	1	V4LAQ5	2	0.216539	0.689851
GO:0006610	ribosomal protein import into nucleus	1	D7LZC0	2	0.216539	0.689851
GO:0050313	sulfur dioxygenase activity	1	A0A087H0R4	2	0.216539	0.689851
GO:1901682	sulfur compound transmembrane transporter activity	1	D7M8K0	2	0.216539	0.689851
GO:0019305	dTDP-rhamnose biosynthetic process	1	A0A0D3CVE8	2	0.216539	0.689851
GO:0004352	glutamate dehydrogenase (NAD+) activity	1	R0FFN4	2	0.216539	0.689851
GO:0010359	regulation of anion channel activity	1	A0A126X281	2	0.216539	0.689851
GO:0010362	negative regulation of anion channel activity by blue light	1	A0A126X281	2	0.216539	0.689851
GO:0080136	priming of cellular response to stress	1	V4L1B6	2	0.216539	0.689851
GO:0070072	vacuolar proton-transporting V-type ATPase complex assembly	1	R0HB18	2	0.216539	0.689851
GO:0009641	shade avoidance	1	Q93VW5	2	0.216539	0.689851
GO:0051051	negative regulation of transport	1	A0A126X281	2	0.216539	0.689851
GO:0034766	negative regulation of ion transmembrane transport	1	A0A126X281	2	0.216539	0.689851
GO:0080028	nitrile biosynthetic process	1	A0A178UDK3	2	0.216539	0.689851
GO:0007020	microtubule nucleation	1	V4L088	2	0.216539	0.689851
GO:0071280	cellular response to copper ion	1	A9Q115	2	0.216539	0.689851
GO:0006883	cellular sodium ion homeostasis	1	A0A078I437	2	0.216539	0.689851
GO:0010360	negative regulation of anion channel activity	1	A0A126X281	2	0.216539	0.689851
GO:0030089	phycobilisome	1	D7LZC0	2	0.216539	0.689851
GO:0047951	glutathione thiolesterase activity	1	A0A087H0R4	2	0.216539	0.689851
GO:0010361	regulation of anion channel activity by blue light	1	A0A126X281	2	0.216539	0.689851
GO:0015766	disaccharide transport	1	D7M9P5	2	0.216539	0.689851
GO:0070071	proton-transporting two-sector ATPase complex assembly	1	R0HB18	2	0.216539	0.689851
GO:0051341	regulation of oxidoreductase activity	1	A0A178VMR4	2	0.216539	0.689851
GO:0010111	glyoxysome organization	1	R0HP78	2	0.216539	0.689851
GO:0032876	negative regulation of DNA endoreduplication	1	A0A087HPU9	2	0.216539	0.689851
GO:0006268	DNA unwinding involved in DNA replication	1	O49571	2	0.216539	0.689851
GO:1901465	positive regulation of tetrapyrrole biosynthetic process	1	V4L870	2	0.216539	0.689851
GO:0045851	pH reduction	1	R0HB18	2	0.216539	0.689851
GO:0008517	folic acid transporter activity	1	A0A087H5Y3	2	0.216539	0.689851
GO:0032875	regulation of DNA endoreduplication	1	A0A087HPU9	2	0.216539	0.689851
GO:0033926	glycopeptide alpha-N-acetylgalactosaminidase activity	1	M4C903	2	0.216539	0.689851
GO:1903792	negative regulation of anion transport	1	A0A126X281	2	0.216539	0.689851
GO:0010280	UDP-L-rhamnose synthase activity	1	D7KVC4	2	0.216539	0.689851
GO:0000792	heterochromatin	1	A0A178VMR4	2	0.216539	0.689851
GO:0044611	nuclear pore inner ring	1	K4FQP4	2	0.216539	0.689851
GO:1902652	secondary alcohol metabolic process	1	A0A078EVL1	2	0.216539	0.689851
GO:0032119	sequestering of zinc ion	1	R0HB18	2	0.216539	0.689851
GO:1901002	positive regulation of response to salt stress	1	A0A078I437	2	0.216539	0.689851
GO:0032261	purine nucleotide salvage	1	V4LCV3	2	0.216539	0.689851
GO:0005343	organic acid:sodium symporter activity	1	R0FWY6	2	0.216539	0.689851
GO:0009720	detection of hormone stimulus	1	B0ZX82	2	0.216539	0.689851
GO:0008922	long-chain fatty acid [acyl-carrier-protein] ligase activity	1	D7MH76	2	0.216539	0.689851
GO:0050898	nitrile metabolic process	1	A0A178UDK3	2	0.216539	0.689851
GO:0046505	sulfolipid metabolic process	1	A0A178UMQ8	2	0.216539	0.689851
GO:0008428	ribonuclease inhibitor activity	1	Q9FFE0	2	0.216539	0.689851
GO:0009529	plastid intermembrane space	1	R0FYX9	2	0.216539	0.689851
GO:0047443	4-hydroxy-4-methyl-2-oxoglutarate aldolase activity	1	Q9FFE0	2	0.216539	0.689851
GO:0045300	acyl-[acyl-carrier-protein] desaturase activity	1	A0A0D3AG00	2	0.216539	0.689851
GO:0051194	positive regulation of cofactor metabolic process	1	V4L870	2	0.216539	0.689851
GO:0030644	cellular chloride ion homeostasis	1	A0A078I437	2	0.216539	0.689851
GO:0015772	oligosaccharide transport	1	D7M9P5	2	0.216539	0.689851
GO:0009574	preprophase band	1	V4L088	2	0.216539	0.689851
GO:0042407	cristae formation	1	A0A078FCY8	2	0.216539	0.689851
GO:0072358	cardiovascular system development	1	B0ZX82	2	0.216539	0.689851
GO:0007155	cell adhesion	1	M4E2N4	2	0.216539	0.689851
GO:0034763	negative regulation of transmembrane transport	1	A0A126X281	2	0.216539	0.689851
GO:0005987	sucrose catabolic process	1	M4C903	2	0.216539	0.689851
GO:0071258	cellular response to gravity	1	B9DGT7	2	0.216539	0.689851
GO:0010948	negative regulation of cell cycle process	1	A0A087HPU9	2	0.216539	0.689851
GO:0019008	molybdopterin synthase complex	1	Q9S7A3	2	0.216539	0.689851
GO:0045550	geranylgeranyl reductase activity	1	V4JR39	2	0.216539	0.689851
GO:1902653	secondary alcohol biosynthetic process	1	A0A078EVL1	2	0.216539	0.689851
GO:0018708	thiol S-methyltransferase activity	1	V4L9K1	2	0.216539	0.689851
GO:0006423	cysteinyl-tRNA aminoacylation	1	A0A078FCY8	2	0.216539	0.689851
GO:0051452	intracellular pH reduction	1	R0HB18	2	0.216539	0.689851
GO:0043181	vacuolar sequestering	1	R0HB18	2	0.216539	0.689851
GO:0010289	homogalacturonan biosynthetic process	1	A0A078CJJ1	2	0.216539	0.689851
GO:0009726	detection of endogenous stimulus	1	B0ZX82	2	0.216539	0.689851
GO:0030366	molybdopterin synthase activity	1	Q9S7A3	2	0.216539	0.689851
GO:0016717	oxidoreductase activity, acting on paired donors, with oxidation of a pair of donors resulting in the reduction of molecular oxygen to two molecules of water	1	A0A0D3AG00	2	0.216539	0.689851
GO:0051353	positive regulation of oxidoreductase activity	1	A0A178VMR4	2	0.216539	0.689851
GO:0051743	red chlorophyll catabolite reductase activity	1	A0A087GKB9	2	0.216539	0.689851
GO:0010345	suberin biosynthetic process	1	V4MBI2	2	0.216539	0.689851
GO:0046506	sulfolipid biosynthetic process	1	A0A178UMQ8	2	0.216539	0.689851
GO:0001944	vasculature development	1	B0ZX82	2	0.216539	0.689851
GO:0052317	camalexin metabolic process	1	V4L1B6	2	0.216539	0.689851
GO:0008156	negative regulation of DNA replication	1	A0A087HPU9	2	0.216539	0.689851
GO:0032413	negative regulation of ion transmembrane transporter activity	1	A0A126X281	2	0.216539	0.689851
GO:0016636	oxidoreductase activity, acting on the CH-CH group of donors, iron-sulfur protein as acceptor	1	A0A087GKB9	2	0.216539	0.689851
GO:0015691	cadmium ion transport	1	R0EVP1	2	0.216539	0.689851
GO:0070070	proton-transporting V-type ATPase complex assembly	1	R0HB18	2	0.216539	0.689851
GO:0030656	regulation of vitamin metabolic process	1	V4L870	2	0.216539	0.689851
GO:0055064	chloride ion homeostasis	1	A0A078I437	2	0.216539	0.689851
GO:1901475	pyruvate transmembrane transport	1	R0FWY6	2	0.216539	0.689851
GO:0019646	aerobic electron transport chain	1	A0A0D3EGS7	2	0.216539	0.689851
GO:0050377	UDP-glucose 4,6-dehydratase activity	1	D7KVC4	2	0.216539	0.689851
GO:0004001	adenosine kinase activity	1	V4LCV3	2	0.216539	0.689851
GO:2000104	negative regulation of DNA-dependent DNA replication	1	A0A087HPU9	2	0.216539	0.689851
GO:0032050	clathrin heavy chain binding	1	V4M8P3	2	0.216539	0.689851
GO:0016629	12-oxophytodienoate reductase activity	1	A0A078DXE8	2	0.216539	0.689851
GO:0080165	callose deposition in phloem sieve plate	1	A0A078JZK8	2	0.216539	0.689851
GO:0032410	negative regulation of transporter activity	1	A0A126X281	2	0.216539	0.689851
GO:1901403	positive regulation of tetrapyrrole metabolic process	1	V4L870	2	0.216539	0.689851
GO:0102359	daphnetin 4-O-beta-glucosyltransferase activity	1	A0A178UZN6	2	0.216539	0.689851
GO:0034450	ubiquitin-ubiquitin ligase activity	1	A0A178UNX5	2	0.216539	0.689851
GO:0005851	eukaryotic translation initiation factor 2B complex	1	Q9S832	2	0.216539	0.689851
GO:0010233	phloem transport	1	D7M9P5	2	0.216539	0.689851
GO:0047218	hydroxycinnamate 4-beta-glucosyltransferase activity	1	A0A178UZN6	2	0.216539	0.689851
GO:0043462	regulation of ATPase activity	1	A0A0D3B2W2	2	0.216539	0.689851
GO:0022610	biological adhesion	1	M4E2N4	2	0.216539	0.689851
GO:0015370	solute:sodium symporter activity	1	R0FWY6	2	0.216539	0.689851
GO:0007035	vacuolar acidification	1	R0HB18	2	0.216539	0.689851
GO:0004127	cytidylate kinase activity	1	R0GXD7	2	0.216539	0.689851
GO:0006166	purine ribonucleoside salvage	1	V4LCV3	2	0.216539	0.689851
GO:0008153	para-aminobenzoic acid biosynthetic process	1	D7MNW6	2	0.216539	0.689851
GO:0045922	negative regulation of fatty acid metabolic process	1	A0A087GW30	2	0.216539	0.689851
GO:0048529	magnesium-protoporphyrin IX monomethyl ester (oxidative) cyclase activity	1	Q9M591	2	0.216539	0.689851
GO:0010120	camalexin biosynthetic process	1	V4L1B6	2	0.216539	0.689851
GO:0008203	cholesterol metabolic process	1	A0A078EVL1	2	0.216539	0.689851
GO:0043271	negative regulation of ion transport	1	A0A126X281	2	0.216539	0.689851
GO:0010394	homogalacturonan metabolic process	1	A0A078CJJ1	2	0.216539	0.689851
GO:0031972	chloroplast intermembrane space	1	R0FYX9	2	0.216539	0.689851
GO:0072359	circulatory system development	1	B0ZX82	2	0.216539	0.689851
GO:0102361	esculetin 4-O-beta-glucosyltransferase activity	1	A0A178UZN6	2	0.216539	0.689851
GO:0006695	cholesterol biosynthetic process	1	A0A078EVL1	2	0.216539	0.689851
GO:0046383	dTDP-rhamnose metabolic process	1	A0A0D3CVE8	2	0.216539	0.689851
GO:0003854	3-beta-hydroxy-delta5-steroid dehydrogenase activity	1	M4ES88	2	0.216539	0.689851
GO:0009041	uridylate kinase activity	1	R0GXD7	2	0.216539	0.689851
GO:0080001	mucilage extrusion from seed coat	1	A0A078GWX8	2	0.216539	0.689851
GO:0003985	acetyl-CoA C-acetyltransferase activity	1	V4KPT6	2	0.216539	0.689851
GO:1902326	positive regulation of chlorophyll biosynthetic process	1	V4L870	2	0.216539	0.689851
GO:0010155	regulation of proton transport	1	A0A126X281	2	0.216539	0.689851
GO:0009513	etioplast	1	A0A078HQA4	2	0.216539	0.689851
GO:0004452	isopentenyl-diphosphate delta-isomerase activity	1	V4LP72	2	0.216539	0.689851
GO:0016920	pyroglutamyl-peptidase activity	1	A0A078IYT3	2	0.216539	0.689851
GO:0034256	chlorophyll(ide) b reductase activity	1	A0A087G4X8	2	0.216539	0.689851
GO:0009828	plant-type cell wall loosening	1	R0GXB3	2	0.216539	0.689851
GO:0009801	cinnamic acid ester metabolic process	1	A0A087HBY0	2	0.216539	0.689851
GO:0031112	positive regulation of microtubule polymerization or depolymerization	1	V4L088	2	0.216539	0.689851
GO:0004353	glutamate dehydrogenase [NAD(P)+] activity	1	R0FFN4	2	0.216539	0.689851
GO:0051738	xanthophyll binding	1	E4MVR1	2	0.216539	0.689851
GO:0009960	endosperm development	1	A0A087H0R4	2	0.216539	0.689851
GO:0009575	chromoplast stroma	1	R0GPX2	2	0.216539	0.689851
GO:0052861	glucan endo-1,3-beta-glucanase activity, C-3 substituted reducing group	1	V4N7G3	2	0.216539	0.689851
GO:0051181	cofactor transport	1	D7M8K0	2	0.216539	0.689851
GO:0034440	lipid oxidation	7	A0A087GW30, V4P148, V4L9M5, R0HP78, V4KPT6, V4MN80, V4LNI4	43	0.218544	0.695458
GO:0033554	cellular response to stress	32	D7LUW2, A0A087HRR4, D7KVA3, D7MM37, B0ZX82, R0HB18, Q8H6F3, V4MSQ9, A9Q115, V4MLG8, A0A178UMQ8, A0A078CT22, O78310, D7MCA9, A0A0D3AEV6, V4KC14, C3S7U7, V4KMF0, A0A178URS6, A0A087GKB9, V4NCV6, F4K2G3, A0A178VA82, M4F776, V4L1B6, A0A087HLV2, W8Q789, A0A178UNX5, V4NC17, V4LZG5, Q93VW5, A0A087HLA4	242	0.220179	0.699873
GO:0050801	ion homeostasis	10	A0A087FY81, R0EVP1, P00294, V4KQ77, D7LF25, A0A078FPP2, R0HB18, A0A178VRQ2, A0A078I437, R0FGI7	66	0.221466	0.703172
GO:0070887	cellular response to chemical stimulus	30	V4LNV9, D7KVA3, B0ZX82, A0A0D3A1T8, Q8H6F3, V4MSQ9, V4MBZ6, A9Q115, V4MLG8, D7LGB8, A0A078CT22, O78310, D7MCA9, A0A0D3AEV6, V4KC14, Q9S7A3, D7KVC4, C3S7U7, A0A178URS6, V4NCV6, R0GXB3, F4K0E8, R0HP78, R0I0R2, V4L1B6, A0A087HLV2, D7MD47, V4LZG5, V4NC17, A0A087HLA4	226	0.222628	0.70607
GO:0043207	response to external biotic stimulus	38	R0EVP1, D7LUW2, O04907, A0A078DXE8, B0ZX82, Q42335, A0A087GLU5, Q8H6J9, A0A087H5Y3, A9Q115, D7LHB8, E4MYB4, A0A178VY01, A0A078BX32, Q39096, R0GQT4, D7LAQ2, E4MXN5, R0FGI7, C3S7U7, V4LT85, R0FHH9, M4CB77, A0A087G5W0, D7M9X2, A0A0A0N2Z4, V4L5N5, A0A087GKB9, A0A0D3BRZ5, A0A078GRJ1, Q9S9N1, V4KD85, F4K0E8, V4L1B6, R0FDJ8, A0A178WJZ1, Q93VW5, D7L3B5	292	0.225455	0.713388
GO:0009639	response to red or far red light	8	Q8LCQ4, D7L7P4, A0A087H3J5, A0A087GAY4, D8L1V9, Q93VW5, M4CFM2, R0GM91	51	0.226196	0.713388
GO:0071496	cellular response to external stimulus	8	A0A178UMQ8, D7KVA3, A0A087HRR4, M4F776, A0A178VA82, V4KC14, R0HB18, A0A087HLA4	51	0.226196	0.713388
GO:0033218	amide binding	8	D7LHB8, M4E7B9, D7KVA3, V4KC14, D7LZC0, A0A178VKB9, V4KUK0, G4WXD8	51	0.226196	0.713388
GO:0031668	cellular response to extracellular stimulus	8	A0A178UMQ8, D7KVA3, A0A087HRR4, M4F776, A0A178VA82, V4KC14, R0HB18, A0A087HLA4	51	0.226196	0.713388
GO:0009521	photosystem	13	A0A175DDT6, R0FME5, E4MVR1, Q6DV58, Q8LCQ4, A0A087HIW3, D7L7P4, A0A078CQS6, A0A078IAV5, A0A0D3A7X4, A0A078GMA7, A0A075C687, D7M1Z0	90	0.229526	0.720478
GO:0010166	wax metabolic process	2	V4MBI2, D7KLH0	8	0.23201	0.720478
GO:0043173	nucleotide salvage	2	V4LCV3, V4LAG2	8	0.23201	0.720478
GO:0010025	wax biosynthetic process	2	V4MBI2, D7KLH0	8	0.23201	0.720478
GO:1903825	organic acid transmembrane transport	2	A0A078HQA4, R0FWY6	8	0.23201	0.720478
GO:0043036	starch grain	2	D7KID6, V4KQF7	8	0.23201	0.720478
GO:0016624	oxidoreductase activity, acting on the aldehyde or oxo group of donors, disulfide as acceptor	2	A0A078J089, V4LAE1	8	0.23201	0.720478
GO:0009569	chloroplast starch grain	2	D7KID6, V4KQF7	8	0.23201	0.720478
GO:0000059	protein import into nucleus, docking	2	K4FQP4, D7LZC0	8	0.23201	0.720478
GO:0097599	xylanase activity	2	D7M2Y3, R0EVU0	8	0.23201	0.720478
GO:0000038	very long-chain fatty acid metabolic process	2	A0A078F758, Q570B4	8	0.23201	0.720478
GO:0005085	guanyl-nucleotide exchange factor activity	2	D7LRR8, Q9S832	8	0.23201	0.720478
GO:0010243	response to organonitrogen compound	2	D7LGB8, V4L1B6	8	0.23201	0.720478
GO:1905039	carboxylic acid transmembrane transport	2	A0A078HQA4, R0FWY6	8	0.23201	0.720478
GO:0000910	cytokinesis	5	V4L088, A0A087GIZ8, A0A0D3B3D4, V4KY43, R0HVT6	29	0.23474	0.725771
GO:0071482	cellular response to light stimulus	5	O78310, O64730, A0A087H3J5, A0A126X281, A9Q115	29	0.23474	0.725771
GO:0071478	cellular response to radiation	5	O78310, O64730, A0A087H3J5, A0A126X281, A9Q115	29	0.23474	0.725771
GO:0031300	intrinsic component of organelle membrane	5	A0A078FWU8, V4NCP4, Q8L847, A0A078HQA4, A0A0D3EGS7	29	0.23474	0.725771
GO:0009570	chloroplast stroma	96	A0A078EJW5, A0A087HNR9, A0A087HRR4, D7KVA3, D7KNV0, D7LF25, A0A087GEG9, A0A078JR72, V4LNN4, R0FME5, O64730, D7L598, A0A078FPP2, V4LKH6, A0A078C054, R0I6C7, R0G9G5, A0A087GP42, V4KUK0, A0A078HPN4, R0FH68, A0A078CQS6, D7LHB8, R0GPX2, A0A078HIH9, A0A078IAV5, D7MUM5, M4E415, V4MAN4, V4LAE1, R0FGI7, A0A078DDQ2, F4HXZ3, M4D1I9, A0A178WJP3, D7MNW6, D7MV68, V4L5N5, Q8LCQ4, D7L7P4, F4K0E8, V4K6K6, A0A087G…	780	0.237781	0.734369
GO:0046906	tetrapyrrole binding	21	V4NQW9, K7ZW05, A0A175DDT6, E4MVR1, R0GTD1, Q9SHG8, Q8H6F3, A0A0A0N2Z4, Q8LCQ4, D7L7P4, V5Q698, V4L9M5, R0I486, R0G495, A0A087HLV2, A0A078GMA7, A0A0D3AEV6, A0A087H3J5, U5KK11, M4EZ85, Q93VW5	155	0.240656	0.742095
GO:0019825	oxygen binding	4	V4L9M5, R0G495, Q93VW5, A0A0A0N2Z4	22	0.241249	0.742095
GO:0010287	plastoglobule	13	R0GYW8, D7LTD9, A0A087H2R7, V4LNN4, Q9M2P7, R0H0T1, Q8LCQ4, D7M9P5, D7L7P4, A0A0D3EGS7, A0A078IM40, D7L3B5, R0IKM7	91	0.241779	0.742095
GO:0007005	mitochondrion organization	8	V4LDY5, D7L560, A0A087HCC7, A0A078HQA4, A0A078FCY8, A0A0D3DX99, V4LJY9, A0A078DVT2	52	0.242578	0.742095
GO:0046395	carboxylic acid catabolic process	15	V4P148, A0A087HS88, D7KN61, A0A078CGS5, D7L0W7, V4KPT6, Q8L847, V4LNI4, D7M6N1, V4L5N5, Q9LQL0, R0HP78, V4MN80, R0GXU4, R0GZW2	107	0.243063	0.742095
GO:0016054	organic acid catabolic process	15	V4P148, A0A087HS88, D7KN61, A0A078CGS5, D7L0W7, V4KPT6, Q8L847, V4LNI4, D7M6N1, V4L5N5, Q9LQL0, R0HP78, V4MN80, R0GXU4, R0GZW2	107	0.243063	0.742095
GO:0016746	transferase activity, transferring acyl groups	15	V4P148, A0A078FGR2, V4KPT6, V4P9U3, O80889, D7MBC3, V4LS18, C5H9M8, D7KLH0, A0A078F758, Q570B4, V4MWN9, A0A078FGD5, R0HP78, A0A0D3ANS5	107	0.243063	0.742095
GO:0009606	tropism	3	D7LUW2, A0A126X281, R0G1S4	15	0.243692	0.742095
GO:0006189	'de novo' IMP biosynthetic process	3	A0A178WJP3, M4DHE7, V4MEI2	15	0.243692	0.742095
GO:0019202	amino acid kinase activity	3	A0A078EJW5, R0GTW4, A0A087GZ16	15	0.243692	0.742095
GO:0016776	phosphotransferase activity, phosphate group as acceptor	3	R0GXD7, A0A087GLL4, F4JYC0	15	0.243692	0.742095
GO:0006085	acetyl-CoA biosynthetic process	3	A0A078J089, V4LAE1, D7KLH0	15	0.243692	0.742095
GO:0015996	chlorophyll catabolic process	3	A0A087GKB9, A0A087G4X8, A0A078E894	15	0.243692	0.742095
GO:0009617	response to bacterium	22	V4LT85, R0EVP1, R0FHH9, D7LUW2, O04907, M4CB77, B0ZX82, Q8H6J9, A9Q115, D7LHB8, A0A078GRJ1, F4K0E8, A0A078BX32, V4L1B6, Q39096, R0FDJ8, A0A178WJZ1, R0GQT4, Q93VW5, E4MXN5, D7L3B5, R0FGI7	164	0.248977	0.757372
GO:1901701	cellular response to oxygen-containing compound	18	V4LNV9, D7KVA3, B0ZX82, A0A0D3A1T8, A0A178URS6, A9Q115, V4MLG8, D7LGB8, O78310, R0GXB3, F4K0E8, R0HP78, D7MCA9, V4L1B6, D7MD47, V4KC14, V4NC17, A0A087HLA4	132	0.253066	0.768984
GO:0008610	lipid biosynthetic process	25	A0A078DXE8, V4KUK0, D7LFE3, D7KLH0, G4WXD8, A0A178UMQ8, D7LA42, M4ES88, D7MH76, Q09GN7, A0A087HPU9, V4L870, A0A078IEP9, A0A087GN96, A0A178VSW7, A0A078F758, Q570B4, F4K0E8, R0HP78, D7M4I1, A0A078EVL1, Q0WW96, V4LZG5, V4LP72, A0A178V9E4	189	0.25377	0.770297
GO:0033692	cellular polysaccharide biosynthetic process	8	D7KID6, A0A087GIZ8, V4KQF7, M4CNQ7, A0A078CJJ1, Q0GPY3, R0HVT6, D7KLH0	53	0.25934	0.782706
GO:1901137	carbohydrate derivative biosynthetic process	26	A0A087HRR4, A0A087HRZ5, R0HB18, D7L0J1, A0A178UMQ8, V5Q698, A0A0D3CVE8, D7KVC4, A0A087GZ28, V4LAG2, D7LZA7, A0A087GWV7, D7LJX7, R0I4D1, A0A178WJP3, D7MV68, A0A0A0N2Z4, A4QKH9, V4LCV3, V4KD85, D7M4I1, R0HVR1, A0A087HAZ7, M4DHE7, Q93VW5, V4MEI2	198	0.260778	0.782706
GO:0071229	cellular response to acid chemical	11	O78310, V4LNV9, D7KVA3, R0GXB3, F4K0E8, R0HP78, D7MCA9, V4L1B6, V4KC14, A0A087HLA4, A9Q115	77	0.266167	0.782706
GO:0016747	transferase activity, transferring acyl groups other than amino-acyl groups	11	A0A078F758, Q570B4, A0A078FGR2, A0A078FGD5, R0HP78, A0A0D3ANS5, V4KPT6, V4P9U3, O80889, D7MBC3, V4LS18	77	0.266167	0.782706
GO:0043086	negative regulation of catalytic activity	6	R0GVN4, V4L5K5, V4LT85, A0A078GRZ7, A0A078D3D0, Q9FFE0	38	0.2668	0.782706
GO:1901681	sulfur compound binding	6	D7LHB8, D7KVA3, V4KC14, V4LNI4, V4KUK0, G4WXD8	38	0.2668	0.782706
GO:0098772	molecular function regulator	14	R0GVN4, V4LT85, A0A078GRZ7, A0A078FN30, R0H9Q7, A0A178VP87, D7LRR8, Q9S832, Q9FFE0, V4L5K5, A0A0D3B2W2, F4J8L7, R0I0R2, A0A078D3D0	101	0.266808	0.782706
GO:0072593	reactive oxygen species metabolic process	12	K7ZW05, R0EVP1, B0ZX82, R0GTD1, Q8H6F3, A9Q115, V4MLG8, O78310, D7M4I1, A0A087HLV2, A0A0D3AEV6, V4NC17	85	0.266829	0.782706
GO:0065009	regulation of molecular function	13	R0GVN4, V4LT85, A0A078GRZ7, A0A078FN30, A0A178VMR4, V4LKH6, Q9S832, Q9FFE0, A0A0D3B2W2, V4L5K5, V4L1B6, A0A126X281, A0A078D3D0	93	0.267006	0.782706
GO:0009832	plant-type cell wall biogenesis	4	D7LA42, A0A087GIZ8, A0A078CJJ1, R0HVT6	23	0.267668	0.782706
GO:0009532	plastid stroma	96	D7KNV0, D7LF25, A0A087GEG9, R0FME5, D7L598, A0A078C054, A0A087GP42, V4KUK0, A0A078HPN4, R0GPX2, A0A078HIH9, A0A078IAV5, D7MUM5, V4MAN4, R0FGI7, A0A078DDQ2, M4D1I9, D7MNW6, D7MV68, Q8LCQ4, F4K0E8, R0FDJ8, R0GTW4, A0A078IM40, Q8W1M5, B9DGT7, P00294, Q9M2P7, G4WXD8, D7LFE3, O04130, D7M9P5, R0FG26, A0A078FCY8, A0A078C9N3, A0A087GZ28, V4LJY9, V4MEL6, D7KN61, A0A078EKR3, A0A087H2R7, V4NCV6, A0A087GD00,…	788	0.273437	0.782706
GO:0016835	carbon-oxygen lyase activity	17	D7LUW2, A0A087GEG9, A0A087GWV7, A0A078EKR3, D7LJX7, O04907, D7MV68, A0A087H276, A0A078EGE6, A0A078CAC6, A0A0D3E2R7, V4MN80, M4F785, A0A0D3CVE8, D7KVC4, A0A087GZ28, A0A078HTC6	126	0.275762	0.782706
GO:0051187	cofactor catabolic process	3	A0A087GKB9, A0A087G4X8, A0A078E894	16	0.276293	0.782706
GO:0006188	IMP biosynthetic process	3	A0A178WJP3, M4DHE7, V4MEI2	16	0.276293	0.782706
GO:0033015	tetrapyrrole catabolic process	3	A0A087GKB9, A0A087G4X8, A0A078E894	16	0.276293	0.782706
GO:0044183	protein binding involved in protein folding	3	V4LDY5, V4LJY9, A0A078DVT2	16	0.276293	0.782706
GO:0034605	cellular response to heat	3	V4NCV6, D7MM37, V4KMF0	16	0.276293	0.782706
GO:0043067	regulation of programmed cell death	3	A0A087GKB9, A0A078I0U0, A0A078FCY8	16	0.276293	0.782706
GO:0006787	porphyrin-containing compound catabolic process	3	A0A087GKB9, A0A087G4X8, A0A078E894	16	0.276293	0.782706
GO:0006573	valine metabolic process	3	R0I4D1, D7MNW6, A0A087HAZ7	16	0.276293	0.782706
GO:0098573	intrinsic component of mitochondrial membrane	3	Q8L847, A0A078HQA4, A0A0D3EGS7	16	0.276293	0.782706
GO:0004185	serine-type carboxypeptidase activity	3	A0A078G6L3, V4P9U3, B9DHR1	16	0.276293	0.782706
GO:0006206	pyrimidine nucleobase metabolic process	3	M4DS51, R0GXD7, A0A078I2R1	16	0.276293	0.782706
GO:0030258	lipid modification	8	A0A087GW30, V4P148, V4L9M5, R0HP78, V4KPT6, V4MN80, V4LNI4, R0G7R3	54	0.276441	0.782706
GO:0016762	xyloglucan:xyloglucosyl transferase activity	2	R0GXB3, A0A087H361	9	0.276961	0.782706
GO:0010466	negative regulation of peptidase activity	2	V4L5K5, A0A078D3D0	9	0.276961	0.782706
GO:0072503	cellular divalent inorganic cation homeostasis	2	R0HB18, A0A178VRQ2	9	0.276961	0.782706
GO:0046685	response to arsenic-containing substance	2	A0A078GRJ1, E4MXN5	9	0.276961	0.782706
GO:0004702	signal transducer, downstream of receptor, with serine/threonine kinase activity	2	A0A087HPB5, V4L1B6	9	0.276961	0.782706
GO:0010951	negative regulation of endopeptidase activity	2	V4L5K5, A0A078D3D0	9	0.276961	0.782706
GO:1901618	organic hydroxy compound transmembrane transporter activity	2	A0A087GGA8, R0FWY6	9	0.276961	0.782706
GO:0001012	RNA polymerase II regulatory region DNA binding	2	A0A087GIZ8, R0HVT6	9	0.276961	0.782706
GO:0009625	response to insect	2	B0ZX82, A0A0A0N2Z4	9	0.276961	0.782706
GO:0006465	signal peptide processing	2	D7L560, A0A087HCC7	9	0.276961	0.782706
GO:0016408	C-acyltransferase activity	2	R0HP78, V4KPT6	9	0.276961	0.782706
GO:1990837	sequence-specific double-stranded DNA binding	2	A0A087GIZ8, R0HVT6	9	0.276961	0.782706
GO:0051052	regulation of DNA metabolic process	2	A0A087HPU9, A0A178VMR4	9	0.276961	0.782706
GO:0052547	regulation of peptidase activity	2	V4L5K5, A0A078D3D0	9	0.276961	0.782706
GO:0000976	transcription regulatory region sequence-specific DNA binding	2	A0A087GIZ8, R0HVT6	9	0.276961	0.782706
GO:0015698	inorganic anion transport	2	D7KS71, A0A178UZD4	9	0.276961	0.782706
GO:0003989	acetyl-CoA carboxylase activity	2	V4KUK0, G4WXD8	9	0.276961	0.782706
GO:0016838	carbon-oxygen lyase activity, acting on phosphates	2	A0A087GEG9, A0A0D3E2R7	9	0.276961	0.782706
GO:0003857	3-hydroxyacyl-CoA dehydrogenase activity	2	V4MN80, A0A078EC23	9	0.276961	0.782706
GO:0072666	establishment of protein localization to vacuole	2	R0I0Y7, A0A178VKB9	9	0.276961	0.782706
GO:0072665	protein localization to vacuole	2	R0I0Y7, A0A178VKB9	9	0.276961	0.782706
GO:0004866	endopeptidase inhibitor activity	2	V4L5K5, A0A078D3D0	9	0.276961	0.782706
GO:0051240	positive regulation of multicellular organismal process	2	V4L5N5, D7KLH0	9	0.276961	0.782706
GO:1901401	regulation of tetrapyrrole metabolic process	2	V4L870, Q9M591	9	0.276961	0.782706
GO:0052548	regulation of endopeptidase activity	2	V4L5K5, A0A078D3D0	9	0.276961	0.782706
GO:0035195	gene silencing by miRNA	2	O78310, A9Q115	9	0.276961	0.782706
GO:0061135	endopeptidase regulator activity	2	V4L5K5, A0A078D3D0	9	0.276961	0.782706
GO:0006623	protein targeting to vacuole	2	R0I0Y7, A0A178VKB9	9	0.276961	0.782706
GO:0000977	RNA polymerase II regulatory region sequence-specific DNA binding	2	A0A087GIZ8, R0HVT6	9	0.276961	0.782706
GO:0048582	positive regulation of post-embryonic development	2	V4L5N5, D7KLH0	9	0.276961	0.782706
GO:0005057	signal transducer activity, downstream of receptor	2	A0A087HPB5, V4L1B6	9	0.276961	0.782706
GO:0008092	cytoskeletal protein binding	10	A0A087HMG0, V4L088, V4M971, V4MN80, A0A0D3B3D4, A0A0D3BI84, A0A078E6H2, V4KY43, A0A0D3DX99, V4MBZ6	70	0.279908	0.782706
GO:0044255	cellular lipid metabolic process	36	V4P148, A0A078DXE8, V4KUK0, G4WXD8, D7KLH0, D7LFE3, D7M9P5, A0A178UMQ8, V4L9M5, V4ME75, D7MH76, A0A087GW30, Q09GN7, V4L870, D7L0W7, A0A087G5Q3, V4KPT6, A0A078IEP9, A0A087GN96, V4LNI4, A0A178VSW7, V4LX24, A0A078F758, Q570B4, F4K0E8, A0A178VXV8, R0HP78, D7M4I1, V4MN80, Q0WW96, A0A0D3AG00, V4LZG5, A0A078EC23, V4LP72, A0A178V9E4, R0G7R3	284	0.286492	0.782706
GO:0009415	response to water	15	A0A087GW30, R0INE7, D7KVA3, A0A078CXB7, A0A078I437, A0A087H5Y3, V4KJE9, V4MA11, O22809, Q39096, A0A087GSM6, R0F3T4, V4KC14, A0A087GGA8, A0A087HLA4	111	0.290322	0.782706
GO:0009250	glucan biosynthetic process	7	D7KID6, A0A087GIZ8, V4KQF7, M4CNQ7, Q0GPY3, R0HVT6, D7KLH0	47	0.291544	0.782706
GO:0009991	response to extracellular stimulus	8	A0A178UMQ8, D7KVA3, A0A087HRR4, M4F776, A0A178VA82, V4KC14, R0HB18, A0A087HLA4	55	0.293837	0.782706
GO:0046112	nucleobase biosynthetic process	4	M4DS51, R0GXD7, A0A078I2R1, V4MEI2	24	0.294567	0.782706
GO:0015979	photosynthesis	35	A0A175DDT6, D7LF25, A0A078HWZ0, R0FME5, A0A078FPP2, V4JR39, M4CFM2, A0A078CQS6, R0GPX2, A0A078IAV5, V4L7G4, A0A087H5C5, Q9M591, A0A078GMA7, R0FGI7, A0A087FY81, Q09GN7, V4L870, E4MVR1, A0A078DKU7, A0A087HL65, Q6DV58, R0GM91, Q8LCQ4, D7L7P4, V4NCV6, R0GFS8, A0A087GF69, A0A0D3A7X4, A0A075C687, D7M1Z0, A0A178VQH8, A0A087GAY4, V4LP72, V4NDH1	277	0.296863	0.782706
GO:0016458	gene silencing	5	O78310, F4K2G3, A0A178VMR4, A0A078E0U6, A9Q115	32	0.303628	0.782706
GO:0030136	clathrin-coated vesicle	5	R0I0Y7, A0A178WJ22, A0A078HC73, A0A178VKB9, V4M8P3	32	0.303628	0.782706
GO:0031110	regulation of microtubule polymerization or depolymerization	1	V4L088	3	0.306553	0.782706
GO:0050833	pyruvate transmembrane transporter activity	1	R0FWY6	3	0.306553	0.782706
GO:0043408	regulation of MAPK cascade	1	V4L1B6	3	0.306553	0.782706
GO:0009702	L-arabinokinase activity	1	V4MRK7	3	0.306553	0.782706
GO:0046320	regulation of fatty acid oxidation	1	A0A087GW30	3	0.306553	0.782706
GO:0019287	isopentenyl diphosphate biosynthetic process, mevalonate pathway	1	A0A178V9E4	3	0.306553	0.782706
GO:0016869	intramolecular transferase activity, transferring amino groups	1	V4NHK7	3	0.306553	0.782706
GO:0010294	abscisic acid glucosyltransferase activity	1	D7L0W7	3	0.306553	0.782706
GO:0006354	DNA-templated transcription, elongation	1	D7LBP2	3	0.306553	0.782706
GO:0043495	protein anchor	1	V4L870	3	0.306553	0.782706
GO:0080109	indole-3-acetonitrile nitrile hydratase activity	1	O04907	3	0.306553	0.782706
GO:0033897	ribonuclease T2 activity	1	A0A078J9J8	3	0.306553	0.782706
GO:0033611	oxalate catabolic process	1	V4L5N5	3	0.306553	0.782706
GO:0000187	activation of MAPK activity	1	V4L1B6	3	0.306553	0.782706
GO:0004046	aminoacylase activity	1	V4MD19	3	0.306553	0.782706
GO:0010564	regulation of cell cycle process	1	A0A087HPU9	3	0.306553	0.782706
GO:0010253	UDP-rhamnose biosynthetic process	1	D7KVC4	3	0.306553	0.782706
GO:0016540	protein autoprocessing	1	Q0WW96	3	0.306553	0.782706
GO:0006646	phosphatidylethanolamine biosynthetic process	1	Q0WW96	3	0.306553	0.782706
GO:0008839	4-hydroxy-tetrahydrodipicolinate reductase	1	A0A087GZ98	3	0.306553	0.782706
GO:0050203	oxalate-CoA ligase activity	1	V4L5N5	3	0.306553	0.782706
GO:0030855	epithelial cell differentiation	1	Q570B4	3	0.306553	0.782706
GO:0006265	DNA topological change	1	O49571	3	0.306553	0.782706
GO:0016894	endonuclease activity, active with either ribo- or deoxyribonucleic acids and producing 3'-phosphomonoesters	1	A0A078J9J8	3	0.306553	0.782706
GO:0043066	negative regulation of apoptotic process	1	A0A078I0U0	3	0.306553	0.782706
GO:0009827	plant-type cell wall modification	1	R0GXB3	3	0.306553	0.782706
GO:0042286	glutamate-1-semialdehyde 2,1-aminomutase activity	1	V4NHK7	3	0.306553	0.782706
GO:0017133	mitochondrial electron transfer flavoprotein complex	1	Q8L847	3	0.306553	0.782706
GO:0090329	regulation of DNA-dependent DNA replication	1	A0A087HPU9	3	0.306553	0.782706
GO:0030320	cellular monovalent inorganic anion homeostasis	1	A0A078I437	3	0.306553	0.782706
GO:0004610	phosphoacetylglucosamine mutase activity	1	R0HVR1	3	0.306553	0.782706
GO:0000060	protein import into nucleus, translocation	1	D7LZC0	3	0.306553	0.782706
GO:0060229	lipase activator activity	1	R0I0R2	3	0.306553	0.782706
GO:0032147	activation of protein kinase activity	1	V4L1B6	3	0.306553	0.782706
GO:0008837	diaminopimelate epimerase activity	1	A0A078C9N3	3	0.306553	0.782706
GO:0006491	N-glycan processing	1	R0GQT4	3	0.306553	0.782706
GO:0046785	microtubule polymerization	1	V4L088	3	0.306553	0.782706
GO:0045251	electron transfer flavoprotein complex	1	Q8L847	3	0.306553	0.782706
GO:1901000	regulation of response to salt stress	1	A0A078I437	3	0.306553	0.782706
GO:0042981	regulation of apoptotic process	1	A0A078I0U0	3	0.306553	0.782706
GO:0004425	indole-3-glycerol-phosphate synthase activity	1	A0A178VZJ5	3	0.306553	0.782706
GO:0022898	regulation of transmembrane transporter activity	1	A0A126X281	3	0.306553	0.782706
GO:2000037	regulation of stomatal complex patterning	1	V4L1B6	3	0.306553	0.782706
GO:0010148	transpiration	1	D7MD47	3	0.306553	0.782706
GO:0046459	short-chain fatty acid metabolic process	1	V4LNI4	3	0.306553	0.782706
GO:0052654	L-leucine transaminase activity	1	M4DTX0	3	0.306553	0.782706
GO:0009882	blue light photoreceptor activity	1	A0A126X281	3	0.306553	0.782706
GO:0047661	amino-acid racemase activity	1	A0A078C9N3	3	0.306553	0.782706
GO:0010007	magnesium chelatase complex	1	A0A087GF69	3	0.306553	0.782706
GO:0017022	myosin binding	1	A0A078E6H2	3	0.306553	0.782706
GO:0005545	1-phosphatidylinositol binding	1	A0A078HC73	3	0.306553	0.782706
GO:0006898	receptor-mediated endocytosis	1	V4M8P3	3	0.306553	0.782706
GO:0048268	clathrin coat assembly	1	A0A078HC73	3	0.306553	0.782706
GO:0003725	double-stranded RNA binding	1	M4EMB0	3	0.306553	0.782706
GO:0009292	genetic transfer	1	D7M1H6	3	0.306553	0.782706
GO:0006915	apoptotic process	1	A0A078I0U0	3	0.306553	0.782706
GO:0005384	manganese ion transmembrane transporter activity	1	R0EVP1	3	0.306553	0.782706
GO:0009911	positive regulation of flower development	1	D7KLH0	3	0.306553	0.782706
GO:0080024	indolebutyric acid metabolic process	1	A0A087HLA4	3	0.306553	0.782706
GO:0009638	phototropism	1	A0A126X281	3	0.306553	0.782706
GO:0009294	DNA mediated transformation	1	D7M1H6	3	0.306553	0.782706
GO:0032412	regulation of ion transmembrane transporter activity	1	A0A126X281	3	0.306553	0.782706
GO:0016004	phospholipase activator activity	1	R0I0R2	3	0.306553	0.782706
GO:0052656	L-isoleucine transaminase activity	1	M4DTX0	3	0.306553	0.782706
GO:0052655	L-valine transaminase activity	1	M4DTX0	3	0.306553	0.782706
GO:0034243	regulation of transcription elongation from RNA polymerase II promoter	1	D7LBP2	3	0.306553	0.782706
GO:0017056	structural constituent of nuclear pore	1	K4FQP4	3	0.306553	0.782706
GO:0060429	epithelium development	1	Q570B4	3	0.306553	0.782706
GO:0060968	regulation of gene silencing	1	A0A178VMR4	3	0.306553	0.782706
GO:0018920	glyphosate metabolic process	1	Q8W1M5	3	0.306553	0.782706
GO:0009913	epidermal cell differentiation	1	Q570B4	3	0.306553	0.782706
GO:0046482	para-aminobenzoic acid metabolic process	1	D7MNW6	3	0.306553	0.782706
GO:0016892	endoribonuclease activity, producing 3'-phosphomonoesters	1	A0A078J9J8	3	0.306553	0.782706
GO:0042586	peptide deformylase activity	1	R0FH68	3	0.306553	0.782706
GO:0006368	transcription elongation from RNA polymerase II promoter	1	D7LBP2	3	0.306553	0.782706
GO:0016115	terpenoid catabolic process	1	D7L0W7	3	0.306553	0.782706
GO:0044210	'de novo' CTP biosynthetic process	1	D7L0J1	3	0.306553	0.782706
GO:0019158	mannokinase activity	1	D7MD47	3	0.306553	0.782706
GO:0043405	regulation of MAP kinase activity	1	V4L1B6	3	0.306553	0.782706
GO:0046337	phosphatidylethanolamine metabolic process	1	Q0WW96	3	0.306553	0.782706
GO:0043686	co-translational protein modification	1	R0FH68	3	0.306553	0.782706
GO:0000220	vacuolar proton-transporting V-type ATPase, V0 domain	1	R0HB18	3	0.306553	0.782706
GO:0047364	desulfoglucosinolate sulfotransferase activity	1	V4KD85	3	0.306553	0.782706
GO:0018315	molybdenum incorporation into molybdenum-molybdopterin complex	1	Q9S7A3	3	0.306553	0.782706
GO:2000379	positive regulation of reactive oxygen species metabolic process	1	R0EVP1	3	0.306553	0.782706
GO:0008300	isoprenoid catabolic process	1	D7L0W7	3	0.306553	0.782706
GO:1903173	fatty alcohol metabolic process	1	V4L870	3	0.306553	0.782706
GO:0032784	regulation of DNA-templated transcription, elongation	1	D7LBP2	3	0.306553	0.782706
GO:0055078	sodium ion homeostasis	1	A0A078I437	3	0.306553	0.782706
GO:0071417	cellular response to organonitrogen compound	1	D7LGB8	3	0.306553	0.782706
GO:0005338	nucleotide-sugar transmembrane transporter activity	1	R0GQQ8	3	0.306553	0.782706
GO:0003883	CTP synthase activity	1	D7L0J1	3	0.306553	0.782706
GO:0052736	beta-glucanase activity	1	V4N7G3	3	0.306553	0.782706
GO:0043687	post-translational protein modification	1	D7LZA7	3	0.306553	0.782706
GO:0004087	carbamoyl-phosphate synthase (ammonia) activity	1	A0A087HRR4	3	0.306553	0.782706
GO:0010315	auxin efflux	1	D7KVC4	3	0.306553	0.782706
GO:0005779	integral component of peroxisomal membrane	1	A0A078FWU8	3	0.306553	0.782706
GO:1902533	positive regulation of intracellular signal transduction	1	V4L1B6	3	0.306553	0.782706
GO:0032409	regulation of transporter activity	1	A0A126X281	3	0.306553	0.782706
GO:0071486	cellular response to high light intensity	1	O78310	3	0.306553	0.782706
GO:0031231	intrinsic component of peroxisomal membrane	1	A0A078FWU8	3	0.306553	0.782706
GO:0043864	indoleacetamide hydrolase activity	1	A0A0D3DYC5	3	0.306553	0.782706
GO:0010088	phloem development	1	R0I4E9	3	0.306553	0.782706
GO:0033478	UDP-rhamnose metabolic process	1	D7KVC4	3	0.306553	0.782706
GO:0033306	phytol metabolic process	1	V4L870	3	0.306553	0.782706
GO:0042040	metal incorporation into metallo-molybdopterin complex	1	Q9S7A3	3	0.306553	0.782706
GO:0043410	positive regulation of MAPK cascade	1	V4L1B6	3	0.306553	0.782706
GO:0043406	positive regulation of MAP kinase activity	1	V4L1B6	3	0.306553	0.782706
GO:0072583	clathrin-dependent endocytosis	1	V4M8P3	3	0.306553	0.782706
GO:0003866	3-phosphoshikimate 1-carboxyvinyltransferase activity	1	Q8W1M5	3	0.306553	0.782706
GO:0016639	oxidoreductase activity, acting on the CH-NH2 group of donors, NAD or NADP as acceptor	1	R0FFN4	3	0.306553	0.782706
GO:0008544	epidermis development	1	Q570B4	3	0.306553	0.782706
GO:0043648	dicarboxylic acid metabolic process	12	A0A078EJW5, A0A087GEG9, R0I4D1, A0A087GZ98, D7MNW6, V4LKH6, V4L5N5, A0A078BX32, A0A087HAZ7, A0A078C9N3, R0GTW4, Q8W1M5	88	0.30808	0.785121
GO:0004364	glutathione transferase activity	6	D7LHB8, R0IN02, D7KVA3, V4KC14, A0A087GLU5, A0A087HR75	40	0.308331	0.785121
GO:0042546	cell wall biogenesis	6	D7LA42, R0GXB3, A0A087GIZ8, A0A087H361, A0A078CJJ1, R0HVT6	40	0.308331	0.785121
GO:0046149	pigment catabolic process	3	A0A087GKB9, A0A087G4X8, A0A078E894	17	0.309278	0.785374
GO:0006546	glycine catabolic process	3	A0A087HS88, D7KN61, Q9LQL0	17	0.309278	0.785374
GO:0010218	response to far red light	3	Q8LCQ4, D7L7P4, D8L1V9	17	0.309278	0.785374
GO:0016765	transferase activity, transferring alkyl or aryl (other than methyl) groups	11	A0A078HKE6, D7LHB8, R0IN02, D7KVA3, A0A078BX32, M4C9N5, V4KC14, A0A087GLU5, Q8W1M5, A0A0D3D1J6, A0A087HR75	80	0.309541	0.785374
GO:0008483	transaminase activity	10	D7KN61, R0I4D1, A0A087G6B2, V4NHK7, A0A078GH59, D7MNW6, A0A087HAZ7, A0A178VP87, M4DTX0, V4M2M8	72	0.310691	0.786879
GO:0016769	transferase activity, transferring nitrogenous groups	10	D7KN61, R0I4D1, A0A087G6B2, V4NHK7, A0A078GH59, D7MNW6, A0A087HAZ7, A0A178VP87, M4DTX0, V4M2M8	72	0.310691	0.786879
GO:0044430	cytoskeletal part	8	V4L088, R0H9Q7, V4LLN6, V4LX88, A0A0D3DX99, A0A087GP42, A0A178VTR1, B9DGT7	56	0.311486	0.788187
GO:0071495	cellular response to endogenous stimulus	15	V4LNV9, B0ZX82, A0A0D3A1T8, V4MBZ6, A0A178URS6, D7LGB8, R0GXB3, R0HP78, D7MCA9, R0I0R2, V4L1B6, Q9S7A3, D7KVC4, A0A087HLA4, C3S7U7	113	0.31497	0.796292
GO:0048878	chemical homeostasis	13	A0A087FY81, R0EVP1, P00294, D7LF25, V4KQ77, A0A078FPP2, V4LNI4, R0HB18, A0A178VRQ2, A0A078I437, D7MD47, A0A087GGA8, R0FGI7	97	0.319866	0.799232
GO:0000790	nuclear chromatin	2	A0A178VMR4, A0A078E0U6	10	0.32173	0.799232
GO:0004022	alcohol dehydrogenase (NAD) activity	2	M4ES88, A0A178UJW8	10	0.32173	0.799232
GO:0051346	negative regulation of hydrolase activity	2	V4L5K5, A0A078D3D0	10	0.32173	0.799232
GO:0033293	monocarboxylic acid binding	2	V4KUK0, G4WXD8	10	0.32173	0.799232
GO:0006782	protoporphyrinogen IX biosynthetic process	2	A0A078EKR3, V4NHK7	10	0.32173	0.799232
GO:0030162	regulation of proteolysis	2	V4L5K5, A0A078D3D0	10	0.32173	0.799232
GO:0004030	aldehyde dehydrogenase [NAD(P)+] activity	2	R0F3T4, V4MBI2	10	0.32173	0.799232
GO:0004630	phospholipase D activity	2	V4ME75, A0A178VA82	10	0.32173	0.799232
GO:0042335	cuticle development	2	A0A078F758, Q570B4	10	0.32173	0.799232
GO:0070290	N-acylphosphatidylethanolamine-specific phospholipase D activity	2	V4ME75, A0A178VA82	10	0.32173	0.799232
GO:0045861	negative regulation of proteolysis	2	V4L5K5, A0A078D3D0	10	0.32173	0.799232
GO:0006261	DNA-dependent DNA replication	2	A0A087HPU9, O49571	10	0.32173	0.799232
GO:0031965	nuclear membrane	2	R0H9Q7, D7LZC0	10	0.32173	0.799232
GO:0046501	protoporphyrinogen IX metabolic process	2	A0A078EKR3, V4NHK7	10	0.32173	0.799232
GO:0009809	lignin biosynthetic process	4	V4MA11, O22809, M4ES88, R0HVT6	25	0.321783	0.799232
GO:0070585	protein localization to mitochondrion	4	D7L560, A0A087HCC7, A0A078HQA4, A0A078DVT2	25	0.321783	0.799232
GO:0031301	integral component of organelle membrane	4	A0A078FWU8, V4NCP4, Q8L847, A0A078HQA4	25	0.321783	0.799232
GO:0072655	establishment of protein localization to mitochondrion	4	D7L560, A0A087HCC7, A0A078HQA4, A0A078DVT2	25	0.321783	0.799232
GO:0006626	protein targeting to mitochondrion	4	D7L560, A0A087HCC7, A0A078HQA4, A0A078DVT2	25	0.321783	0.799232
GO:0016021	integral component of membrane	127	Q2V606, D7KS71, Q8L847, A0A0D3CQQ6, V4L2K1, R0HB18, A0A078F1W9, V4L4G1, A0A087GRA1, R0IMT8, R0GXG8, D7M3J2, V4L6K8, D7MPK7, D7LAQ2, R0FWY6, M4FD85, Q09GN7, M4CXQ8, D7LZA7, E4MVR1, A0A178W0Q2, V4MDD9, D7LRR8, A0A087HR60, A0A078H0N6, Q8LCQ4, V4NCP4, M4F776, D7M8K0, Q8H118, A0A087HBX3, R0GQQ8, M4CWP3, R0GVN4, A0A175DDT6, D7L7X0, V4JQT7, V4KII7, A0A078DGF1, A0A0D3BKF7, A0A078GNK2, A0A087GIZ8, A0A078C…	1064	0.323328	0.802365
GO:0044283	small molecule biosynthetic process	52	A0A078EJW5, A0A087HRR4, A0A087GEG9, O04907, A0A078DXE8, V4LKH6, A0A078FM14, V4JR39, V4KUK0, A0A078D820, A0A078EGE6, A0A078BX32, Q9SE60, D7MH76, Q09GN7, V4L870, A0A087GZ98, A0A078IEP9, D7MNW6, D7MV68, A0A078CBH7, A0A087H276, A0A078F758, R0HP78, R0FDJ8, A0A087HAZ7, R0GTW4, Q8W1M5, A0A0D3DYC5, A0A178VZJ5, R0GZW2, A0A087GZ16, D7LUW2, V4L4Q7, G4WXD8, D7KLH0, D7M9P5, O04130, A0A078C9N3, A0A087GZ28, D7M…	424	0.324474	0.804501
GO:0009966	regulation of signal transduction	5	R0HP78, D7MCA9, V4L1B6, B0ZX82, D7KVC4	33	0.327283	0.808632
GO:0010646	regulation of cell communication	5	R0HP78, D7MCA9, V4L1B6, B0ZX82, D7KVC4	33	0.327283	0.808632
GO:0008047	enzyme activator activity	5	A0A0D3B2W2, F4J8L7, R0I0R2, R0H9Q7, A0A178VP87	33	0.327283	0.808632
GO:0023051	regulation of signaling	5	R0HP78, D7MCA9, V4L1B6, B0ZX82, D7KVC4	33	0.327283	0.808632
GO:0030001	metal ion transport	8	A0A087FY81, R0EVP1, V4KQ77, D7LF25, A0A078FPP2, A0A178VRQ2, R0FWY6, R0FGI7	57	0.329344	0.813014
GO:1901565	organonitrogen compound catabolic process	18	A0A087HS88, D7KN61, A0A087G4X8, A0A087G5Q3, A0A078CGS5, Q8L847, A0A078E894, V4LX24, Q9LQL0, A0A087GKB9, O82772, A0A078I2G0, A0A078GY33, A0A087G8C1, A0A178UDK3, D7LYI5, R0GXU4, C3S7U7	139	0.330001	0.813926
GO:0050790	regulation of catalytic activity	12	R0GVN4, A0A0D3B2W2, V4L5K5, V4LT85, A0A078GRZ7, A0A078FN30, V4L1B6, A0A178VMR4, V4LKH6, A0A078D3D0, Q9S832, Q9FFE0	90	0.336448	0.829103
GO:0006790	sulfur compound metabolic process	32	A0A078EJW5, A0A078J089, D7KVA3, A0A087GLU5, D7KLH0, A0A178UMQ8, A0A078D820, D7LHB8, O82772, V5Q698, Q9SE60, A0A178UDK3, V4KC14, A0A078HLY0, A0A087GZ28, Q9S7A3, V4LAE1, D7LJX7, M4C9N5, R0I4D1, D7MV68, A0A078CBH7, A0A0A0N2Z4, A0A078HKE6, R0IN02, V4KD85, V4L1B6, A0A087HAZ7, V4MBI2, A0A178V9E4, Q93VW5, R0G7R3	257	0.338951	0.834545
GO:0031409	pigment binding	3	Q8LCQ4, D7L7P4, E4MVR1	18	0.342373	0.835698
GO:0009637	response to blue light	3	Q8LCQ4, D7L7P4, A0A126X281	18	0.342373	0.835698
GO:0045330	aspartyl esterase activity	3	R0GVN4, V4LT85, A0A078GRZ7	18	0.342373	0.835698
GO:0046040	IMP metabolic process	3	A0A178WJP3, M4DHE7, V4MEI2	18	0.342373	0.835698
GO:0046912	transferase activity, transferring acyl groups, acyl groups converted into alkyl on transfer	3	V4P148, D7KLH0, C5H9M8	18	0.342373	0.835698
GO:0010941	regulation of cell death	3	A0A087GKB9, A0A078I0U0, A0A078FCY8	18	0.342373	0.835698
GO:0009695	jasmonic acid biosynthetic process	3	R0HP78, A0A078DXE8, V4L4Q7	18	0.342373	0.835698
GO:0009640	photomorphogenesis	3	A0A087GAY4, M4CFM2, R0GM91	18	0.342373	0.835698
GO:0016569	covalent chromatin modification	3	D7MDG3, F4K2G3, A0A178VMR4	18	0.342373	0.835698
GO:0016857	racemase and epimerase activity, acting on carbohydrates and derivatives	3	D7M6Z2, R0GQC1, A0A078CJX0	18	0.342373	0.835698
GO:0006631	fatty acid metabolic process	20	A0A087GW30, Q09GN7, V4P148, V4KPT6, A0A078IEP9, A0A078DXE8, V4LNI4, A0A178VSW7, V4KUK0, G4WXD8, D7KLH0, D7M9P5, A0A078F758, Q570B4, V4L9M5, R0HP78, V4MN80, D7MH76, A0A0D3AG00, A0A078EC23	157	0.345213	0.839221
GO:0044712	single-organism catabolic process	43	M4C903, V4P148, A0A078J089, D7KVA3, A0A087G4X8, A0A078CGS5, Q8L847, A0A087GLU5, A0A078E894, Q9LQL0, D7LHB8, O82772, V4ME75, A0A178UDK3, V4KC14, V4KVI9, V4LAE1, A0A087HS88, D7KN61, A0A087G5Q3, D7L0W7, A0A078H0Z9, V4KPT6, V4LNI4, D7M6N1, V4LX24, A0A087GS72, V4L5N5, A0A087H0R4, R0IN02, A0A087GKB9, D7MD83, D7KJB1, R0HP78, A0A087G8C1, A0A178VA82, V4MN80, R0EVU0, D7LYI5, D7MD47, A0A178UNX5, R0GXU4, R0G…	351	0.347207	0.839221
GO:0060089	molecular transducer activity	4	D7LGB8, B0ZX82, A0A0D3A1T8, A0A126X281	26	0.349164	0.839221
GO:0004872	receptor activity	4	D7LGB8, B0ZX82, A0A0D3A1T8, A0A126X281	26	0.349164	0.839221
GO:0042743	hydrogen peroxide metabolic process	7	K7ZW05, D7M4I1, A0A087HLV2, B0ZX82, A0A0D3AEV6, R0GTD1, Q8H6F3	50	0.34944	0.839221
GO:0009814	defense response, incompatible interaction	7	A0A087GKB9, R0FHH9, V4KD85, F4K0E8, B0ZX82, D7M9X2, C3S7U7	50	0.34944	0.839221
GO:0030234	enzyme regulator activity	12	R0GVN4, V4LT85, A0A078GRZ7, A0A078FN30, R0H9Q7, A0A178VP87, Q9FFE0, V4L5K5, A0A0D3B2W2, F4J8L7, R0I0R2, A0A078D3D0	91	0.350828	0.839221
GO:0048580	regulation of post-embryonic development	5	V4L1B6, B0ZX82, V4L5N5, D7KLH0, D7LBP2	34	0.351114	0.839221
GO:0006839	mitochondrial transport	5	D7L560, A0A087HCC7, D7M8K0, A0A078HQA4, A0A078DVT2	34	0.351114	0.839221
GO:0009699	phenylpropanoid biosynthetic process	5	V4MA11, O22809, M4ES88, R0HVT6, V4MBI2	34	0.351114	0.839221
GO:0009657	plastid organization	18	D7LTD9, D7LJX7, D7LZA0, D7L560, A0A087HCC7, O64730, E4MVR1, A0A078C054, R0HP78, Q9M591, D7M8K0, M4E415, A0A126X281, R0G1S4, Q8VY88, A0A087GZ28, D7L3B5, V4MEI2	141	0.353046	0.839221
GO:0009414	response to water deprivation	14	A0A087GW30, R0INE7, D7KVA3, A0A078I437, A0A087H5Y3, V4KJE9, V4MA11, O22809, Q39096, A0A087GSM6, V4KC14, R0F3T4, A0A087GGA8, A0A087HLA4	108	0.356916	0.839221
GO:0071310	cellular response to organic substance	19	V4LNV9, B0ZX82, A0A0D3A1T8, V4MBZ6, A9Q115, A0A178URS6, D7LGB8, O78310, R0GXB3, F4K0E8, R0HP78, D7MCA9, R0I0R2, V4L1B6, D7MD47, D7KVC4, Q9S7A3, A0A087HLA4, C3S7U7	150	0.360364	0.839221
GO:0072330	monocarboxylic acid biosynthetic process	16	Q09GN7, O04907, A0A078IEP9, D7MNW6, A0A078DXE8, V4L4Q7, A0A178VSW7, V4KUK0, G4WXD8, D7KLH0, A0A078F758, Q570B4, R0HP78, D7MH76, Q93VW5, A0A0D3DYC5	125	0.361366	0.839221
GO:0016421	CoA carboxylase activity	2	V4KUK0, G4WXD8	11	0.365766	0.839221
GO:0015923	mannosidase activity	2	D7L7Z4, A0A0D3ACP6	11	0.365766	0.839221
GO:0016885	ligase activity, forming carbon-carbon bonds	2	V4KUK0, G4WXD8	11	0.365766	0.839221
GO:0099600	transmembrane receptor activity	2	D7LGB8, A0A0D3A1T8	11	0.365766	0.839221
GO:0006833	water transport	2	D7MD47, A0A087GGA8	11	0.365766	0.839221
GO:0080135	regulation of cellular response to stress	2	A0A087GKB9, V4L1B6	11	0.365766	0.839221
GO:0006207	'de novo' pyrimidine nucleobase biosynthetic process	2	R0GXD7, A0A078I2R1	11	0.365766	0.839221
GO:0102483	scopolin beta-glucosidase activity	2	D7L7Z4, A0A178URS6	11	0.365766	0.839221
GO:0051094	positive regulation of developmental process	2	V4L5N5, D7KLH0	11	0.365766	0.839221
GO:0051347	positive regulation of transferase activity	2	V4L1B6, V4LKH6	11	0.365766	0.839221
GO:0005960	glycine cleavage complex	2	A0A087HS88, Q9LQL0	11	0.365766	0.839221
GO:0004888	transmembrane signaling receptor activity	2	D7LGB8, A0A0D3A1T8	11	0.365766	0.839221
GO:0042044	fluid transport	2	D7MD47, A0A087GGA8	11	0.365766	0.839221
GO:0044454	nuclear chromosome part	2	A0A178VMR4, A0A078E0U6	11	0.365766	0.839221
GO:0030414	peptidase inhibitor activity	2	V4L5K5, A0A078D3D0	11	0.365766	0.839221
GO:1903409	reactive oxygen species biosynthetic process	2	D7M4I1, B0ZX82	11	0.365766	0.839221
GO:0009743	response to carbohydrate	7	V4NCV6, O78310, A0A078HQA4, B0ZX82, D7MD47, V4LKH6, A9Q115	51	0.369047	0.839221
GO:0005982	starch metabolic process	7	D7KID6, A0A078GAK2, V4KQF7, V4MAN4, V4KVI9, V4LDL5, D7KLH0	51	0.369047	0.839221
GO:0032787	monocarboxylic acid metabolic process	43	V4P148, A0A078J089, A0A178UZN6, A0A087HBY0, O04907, A0A087HLD0, A0A078DXE8, V4L4Q7, V4KUK0, A0A0D3DYT6, Q9LFJ9, D7LFE3, G4WXD8, D7KLH0, D7M9P5, V4L9M5, D7MH76, V4LAE1, D7MVE3, A0A087GW30, Q09GN7, D7L0W7, A0A078H0Z9, V4KPT6, D7MNW6, A0A078IEP9, V4LNI4, D7M6N1, A0A087GS72, A0A178VSW7, A0A087H0R4, A0A078F758, Q570B4, F4K0E8, R0HP78, V4MN80, D7MD47, A0A0D3AG00, A0A078EC23, Q93VW5, A0A0D3DYC5, A0A087H…	354	0.369549	0.839221
GO:0006458	'de novo' protein folding	3	V4LDY5, V4LJY9, A0A078DVT2	19	0.375335	0.839221
GO:0030076	light-harvesting complex	3	Q8LCQ4, E4MVR1, D7LZC0	19	0.375335	0.839221
GO:0003002	regionalization	3	D7M1H6, A0A087HPU9, V4L1B6	19	0.375335	0.839221
GO:0030276	clathrin binding	3	A0A178WJ22, A0A078HC73, V4M8P3	19	0.375335	0.839221
GO:0015645	fatty acid ligase activity	3	A0A078IEP9, D7MH76, A0A178VSW7	19	0.375335	0.839221
GO:0009694	jasmonic acid metabolic process	3	R0HP78, A0A078DXE8, V4L4Q7	19	0.375335	0.839221
GO:0032270	positive regulation of cellular protein metabolic process	3	D7LTD9, V4L1B6, R0I6C7	19	0.375335	0.839221
GO:0009629	response to gravity	3	D7LUW2, R0G1S4, B9DGT7	19	0.375335	0.839221
GO:1901607	alpha-amino acid biosynthetic process	25	A0A078EJW5, D7LUW2, A0A087HRR4, V4LKH6, A0A078FM14, O04130, A0A078D820, Q9SE60, A0A078C9N3, A0A087GZ28, D7LJX7, R0I4D1, A0A087GZ98, D7MNW6, D7MV68, D7M6N1, A0A078CBH7, R0FDJ8, A0A087HAZ7, A0A178WJZ1, R0GTW4, Q93VW5, A0A178VZJ5, R0GZW2, A0A087GZ16	202	0.376107	0.839221
GO:0016854	racemase and epimerase activity	4	D7M6Z2, R0GQC1, A0A078C9N3, A0A078CJX0	27	0.376566	0.839221
GO:0016645	oxidoreductase activity, acting on the CH-NH group of donors	4	A0A078CGS5, Q9SE60, Q8L847, R0GXU4	27	0.376566	0.839221
GO:0061077	chaperone-mediated protein folding	4	V4LDY5, D7MM37, V4LJY9, A0A078DVT2	27	0.376566	0.839221
GO:0048519	negative regulation of biological process	19	A0A087GW30, Q09GN7, A0A078I0U0, A0A087HPU9, P00294, B0ZX82, A0A178VMR4, A0A078E0U6, A9Q115, D7M1H6, V4NCV6, V4L5K5, O78310, F4K2G3, R0I0R2, A0A078C2E1, A0A126X281, A0A078D3D0, D7LBP2	152	0.383144	0.839221
GO:0016101	diterpenoid metabolic process	1	V4L870	4	0.386237	0.839221
GO:0030002	cellular anion homeostasis	1	A0A078I437	4	0.386237	0.839221
GO:0015296	anion:cation symporter activity	1	R0FWY6	4	0.386237	0.839221
GO:0009862	systemic acquired resistance, salicylic acid mediated signaling pathway	1	F4K0E8	4	0.386237	0.839221
GO:0004047	aminomethyltransferase activity	1	D7KN61	4	0.386237	0.839221
GO:0030497	fatty acid elongation	1	D7MH76	4	0.386237	0.839221
GO:0015081	sodium ion transmembrane transporter activity	1	R0FWY6	4	0.386237	0.839221
GO:0009678	hydrogen-translocating pyrophosphatase activity	1	R0HB18	4	0.386237	0.839221
GO:0018198	peptidyl-cysteine modification	1	V4NCV6	4	0.386237	0.839221
GO:0080061	indole-3-acetonitrile nitrilase activity	1	O04907	4	0.386237	0.839221
GO:0003916	DNA topoisomerase activity	1	O49571	4	0.386237	0.839221
GO:0006848	pyruvate transport	1	R0FWY6	4	0.386237	0.839221
GO:0070592	cell wall polysaccharide biosynthetic process	1	A0A078CJJ1	4	0.386237	0.839221
GO:0006007	glucose catabolic process	1	A0A078H0Z9	4	0.386237	0.839221
GO:0009690	cytokinin metabolic process	1	B0ZX82	4	0.386237	0.839221
GO:0046889	positive regulation of lipid biosynthetic process	1	V4L870	4	0.386237	0.839221
GO:0033984	indole-3-glycerol-phosphate lyase activity	1	D7LUW2	4	0.386237	0.839221
GO:0052325	cell wall pectin biosynthetic process	1	A0A078CJJ1	4	0.386237	0.839221
GO:0034059	response to anoxia	1	V4NCV6	4	0.386237	0.839221
GO:0019213	deacetylase activity	1	D7M1H6	4	0.386237	0.839221
GO:0033319	UDP-D-xylose metabolic process	1	A0A0D3CVE8	4	0.386237	0.839221
GO:0051189	prosthetic group metabolic process	1	Q9S7A3	4	0.386237	0.839221
GO:1902170	cellular response to reactive nitrogen species	1	A0A178URS6	4	0.386237	0.839221
GO:0010190	cytochrome b6f complex assembly	1	V4ME47	4	0.386237	0.839221
GO:0019720	Mo-molybdopterin cofactor metabolic process	1	Q9S7A3	4	0.386237	0.839221
GO:0051183	vitamin transporter activity	1	A0A087H5Y3	4	0.386237	0.839221
GO:0031907	microbody lumen	1	D7MIF8	4	0.386237	0.839221
GO:0004108	citrate (Si)-synthase activity	1	V4P148	4	0.386237	0.839221
GO:0046130	purine ribonucleoside catabolic process	1	A0A087G8C1	4	0.386237	0.839221
GO:0006855	drug transmembrane transport	1	A0A087H5Y3	4	0.386237	0.839221
GO:0003979	UDP-glucose 6-dehydrogenase activity	1	V4LNY4	4	0.386237	0.839221
GO:0033558	protein deacetylase activity	1	D7M1H6	4	0.386237	0.839221
GO:0052315	phytoalexin biosynthetic process	1	V4L1B6	4	0.386237	0.839221
GO:2000243	positive regulation of reproductive process	1	D7KLH0	4	0.386237	0.839221
GO:0009910	negative regulation of flower development	1	D7LBP2	4	0.386237	0.839221
GO:0006275	regulation of DNA replication	1	A0A087HPU9	4	0.386237	0.839221
GO:0006828	manganese ion transport	1	R0EVP1	4	0.386237	0.839221
GO:0019375	galactolipid biosynthetic process	1	D7M4I1	4	0.386237	0.839221
GO:2000242	negative regulation of reproductive process	1	D7LBP2	4	0.386237	0.839221
GO:0032580	Golgi cisterna membrane	1	A0A0D3CVE8	4	0.386237	0.839221
GO:0010110	regulation of photosynthesis, dark reaction	1	V4NCV6	4	0.386237	0.839221
GO:0033320	UDP-D-xylose biosynthetic process	1	A0A0D3CVE8	4	0.386237	0.839221
GO:0000025	maltose catabolic process	1	V4KVI9	4	0.386237	0.839221
GO:0018822	nitrile hydratase activity	1	O04907	4	0.386237	0.839221
GO:0055071	manganese ion homeostasis	1	A0A178VRQ2	4	0.386237	0.839221
GO:0019374	galactolipid metabolic process	1	D7M4I1	4	0.386237	0.839221
GO:0006777	Mo-molybdopterin cofactor biosynthetic process	1	Q9S7A3	4	0.386237	0.839221
GO:0042454	ribonucleoside catabolic process	1	A0A087G8C1	4	0.386237	0.839221
GO:0052546	cell wall pectin metabolic process	1	A0A078CJJ1	4	0.386237	0.839221
GO:0080153	negative regulation of reductive pentose-phosphate cycle	1	V4NCV6	4	0.386237	0.839221
GO:0004134	4-alpha-glucanotransferase activity	1	V4KVI9	4	0.386237	0.839221
GO:0071454	cellular response to anoxia	1	V4NCV6	4	0.386237	0.839221
GO:0045834	positive regulation of lipid metabolic process	1	V4L870	4	0.386237	0.839221
GO:0006121	mitochondrial electron transport, succinate to ubiquinone	1	A0A178UNP1	4	0.386237	0.839221
GO:0010375	stomatal complex patterning	1	V4L1B6	4	0.386237	0.839221
GO:0043545	molybdopterin cofactor metabolic process	1	Q9S7A3	4	0.386237	0.839221
GO:0070507	regulation of microtubule cytoskeleton organization	1	V4L088	4	0.386237	0.839221
GO:0009700	indole phytoalexin biosynthetic process	1	V4L1B6	4	0.386237	0.839221
GO:0046217	indole phytoalexin metabolic process	1	V4L1B6	4	0.386237	0.839221
GO:0032886	regulation of microtubule-based process	1	V4L088	4	0.386237	0.839221
GO:0036440	citrate synthase activity	1	V4P148	4	0.386237	0.839221
GO:0051053	negative regulation of DNA metabolic process	1	A0A087HPU9	4	0.386237	0.839221
GO:0036361	racemase activity, acting on amino acids and derivatives	1	A0A078C9N3	4	0.386237	0.839221
GO:0010928	regulation of auxin mediated signaling pathway	1	D7KVC4	4	0.386237	0.839221
GO:0004044	amidophosphoribosyltransferase activity	1	V4MEI2	4	0.386237	0.839221
GO:0009403	toxin biosynthetic process	1	V4L1B6	4	0.386237	0.839221
GO:0044786	cell cycle DNA replication	1	A0A087HPU9	4	0.386237	0.839221
GO:0008028	monocarboxylic acid transmembrane transporter activity	1	R0FWY6	4	0.386237	0.839221
GO:0015893	drug transport	1	A0A087H5Y3	4	0.386237	0.839221
GO:0045833	negative regulation of lipid metabolic process	1	A0A087GW30	4	0.386237	0.839221
GO:0052314	phytoalexin metabolic process	1	V4L1B6	4	0.386237	0.839221
GO:0016855	racemase and epimerase activity, acting on amino acids and derivatives	1	A0A078C9N3	4	0.386237	0.839221
GO:0004407	histone deacetylase activity	1	D7M1H6	4	0.386237	0.839221
GO:0080114	positive regulation of glycine hydroxymethyltransferase activity	1	V4LKH6	4	0.386237	0.839221
GO:0033609	oxalate metabolic process	1	V4L5N5	4	0.386237	0.839221
GO:0016812	hydrolase activity, acting on carbon-nitrogen (but not peptide) bonds, in cyclic amides	1	M4DS51	4	0.386237	0.839221
GO:0071732	cellular response to nitric oxide	1	A0A178URS6	4	0.386237	0.839221
GO:0009539	photosystem II reaction center	1	A0A175DDT6	4	0.386237	0.839221
GO:0009593	detection of chemical stimulus	1	B0ZX82	4	0.386237	0.839221
GO:0045828	positive regulation of isoprenoid metabolic process	1	V4L870	4	0.386237	0.839221
GO:0097576	vacuole fusion	1	V4ML31	4	0.386237	0.839221
GO:0005782	peroxisomal matrix	1	D7MIF8	4	0.386237	0.839221
GO:1902882	regulation of response to oxidative stress	1	A0A078I437	4	0.386237	0.839221
GO:0009660	amyloplast organization	1	R0G1S4	4	0.386237	0.839221
GO:0044038	cell wall macromolecule biosynthetic process	1	A0A078CJJ1	4	0.386237	0.839221
GO:0031109	microtubule polymerization or depolymerization	1	V4L088	4	0.386237	0.839221
GO:0042023	DNA endoreduplication	1	A0A087HPU9	4	0.386237	0.839221
GO:0030026	cellular manganese ion homeostasis	1	A0A178VRQ2	4	0.386237	0.839221
GO:0070589	cellular component macromolecule biosynthetic process	1	A0A078CJJ1	4	0.386237	0.839221
GO:0055046	microgametogenesis	1	A0A178WJP3	4	0.386237	0.839221
GO:0004551	nucleotide diphosphatase activity	1	A0A178UUK6	4	0.386237	0.839221
GO:0007007	inner mitochondrial membrane organization	1	A0A078FCY8	4	0.386237	0.839221
GO:0048830	adventitious root development	1	Q93VW5	4	0.386237	0.839221
GO:0005086	ARF guanyl-nucleotide exchange factor activity	1	D7LRR8	4	0.386237	0.839221
GO:1902884	positive regulation of response to oxidative stress	1	A0A078I437	4	0.386237	0.839221
GO:0080152	regulation of reductive pentose-phosphate cycle	1	V4NCV6	4	0.386237	0.839221
GO:0018812	3-hydroxyacyl-CoA dehydratase activity	1	V4MN80	4	0.386237	0.839221
GO:0005783	endoplasmic reticulum	39	D7MM37, B0ZX82, A0A0D3B7Y7, V4KII7, V4KQ28, D7M5S1, E4MWW0, A0A078I437, A0A078GLC2, O82772, D7LA42, R0GXG8, R0GQT4, A0A078FC28, A0A178V0E9, D7LZA7, A0A087HPU9, R0H9Q7, A0A078FK28, D7LRR8, V4MDD9, A0A078D332, D7MQ24, A0A178VSW7, P33524, A0A0A0N2Z4, R0IP21, D7LVM4, D7KIH9, Q570B4, M4E7B9, M4F776, A0A078EVL1, A0A087HBX3, Q0WW96, V4KKY6, A0A178VKB9, Q93VW5, V4MBI2	323	0.393539	0.854352
GO:0006541	glutamine metabolic process	6	A0A078I2R1, A0A178WJP3, V4LKH6, A0A178WJZ1, D7L0J1, V4MEI2	44	0.393805	0.854352
GO:0009056	catabolic process	75	M4C903, V4P148, A0A078J089, D7KVA3, A0A078CGS5, B2CXV5, Q8L847, V4P9U3, A0A087GLU5, R0GTD1, A0A178VBF6, D7LHB8, A0A087H5E9, A0A087G8N1, V4KVI9, V4MAN4, V4LAE1, A0A087HS88, A0A087G5Q3, D7L0W7, A0A078H0Z9, V4LKQ8, V4LX24, A0A087GS72, V4L5N5, R0IN02, A0A078I2G0, R0HP78, A0A087G8C1, A0A178VA82, V4MN80, R0EVU0, B9DHR1, R0GZW2, R0GVN4, A0A087G4X8, V4JQT7, A0A087H361, A0A087H4Y0, A0A0D3CT04, A0A078E894,…	632	0.396097	0.858665
GO:0032870	cellular response to hormone stimulus	14	V4LNV9, B0ZX82, A0A0D3A1T8, V4MBZ6, A0A178URS6, R0GXB3, R0HP78, D7MCA9, R0I0R2, V4L1B6, Q9S7A3, D7KVC4, A0A087HLA4, C3S7U7	111	0.397164	0.86032
GO:0072528	pyrimidine-containing compound biosynthetic process	5	M4DS51, R0GXD7, A0A087HRR4, A0A078I2R1, D7L0J1	36	0.398924	0.86347
GO:0010181	FMN binding	3	A0A078DXE8, A0A078C2E1, A0A126X281	20	0.407947	0.864026
GO:0044389	ubiquitin-like protein ligase binding	3	A0A0D3C784, M4CB77, A0A0D3CT04	20	0.407947	0.864026
GO:0030095	chloroplast photosystem II	3	A0A078CQS6, A0A078IAV5, D7M1Z0	20	0.407947	0.864026
GO:0035384	thioester biosynthetic process	3	A0A078J089, V4LAE1, D7KLH0	20	0.407947	0.864026
GO:0070008	serine-type exopeptidase activity	3	A0A078G6L3, V4P9U3, B9DHR1	20	0.407947	0.864026
GO:0071616	acyl-CoA biosynthetic process	3	A0A078J089, V4LAE1, D7KLH0	20	0.407947	0.864026
GO:0051247	positive regulation of protein metabolic process	3	D7LTD9, V4L1B6, R0I6C7	20	0.407947	0.864026
GO:0016774	phosphotransferase activity, carboxyl group as acceptor	3	A0A078EJW5, R0GTW4, A0A087GZ16	20	0.407947	0.864026
GO:0000160	phosphorelay signal transduction system	3	B0ZX82, A0A126X281, C3S7U7	20	0.407947	0.864026
GO:0031625	ubiquitin protein ligase binding	3	A0A0D3C784, M4CB77, A0A0D3CT04	20	0.407947	0.864026
GO:0009173	pyrimidine ribonucleoside monophosphate metabolic process	2	R0GXD7, A0A087HRR4	12	0.408648	0.864026
GO:0044815	DNA packaging complex	2	A0A078C4K3, A0A078E0U6	12	0.408648	0.864026
GO:0000228	nuclear chromosome	2	A0A178VMR4, A0A078E0U6	12	0.408648	0.864026
GO:0032592	integral component of mitochondrial membrane	2	Q8L847, A0A078HQA4	12	0.408648	0.864026
GO:0019288	isopentenyl diphosphate biosynthetic process, methylerythritol 4-phosphate pathway	2	F4K0E8, D7LFE3	12	0.408648	0.864026
GO:0034250	positive regulation of cellular amide metabolic process	2	D7LTD9, R0I6C7	12	0.408648	0.864026
GO:0006556	S-adenosylmethionine biosynthetic process	2	A0A078HKE6, M4C9N5	12	0.408648	0.864026
GO:0010411	xyloglucan metabolic process	2	R0GXB3, A0A087H361	12	0.408648	0.864026
GO:0032993	protein-DNA complex	2	A0A078C4K3, A0A078E0U6	12	0.408648	0.864026
GO:0061659	ubiquitin-like protein ligase activity	2	A0A178VMR4, A0A178UNX5	12	0.408648	0.864026
GO:0061134	peptidase regulator activity	2	V4L5K5, A0A078D3D0	12	0.408648	0.864026
GO:0072507	divalent inorganic cation homeostasis	2	R0HB18, A0A178VRQ2	12	0.408648	0.864026
GO:0009514	glyoxysome	2	R0HP78, V4LNI4	12	0.408648	0.864026
GO:0004478	methionine adenosyltransferase activity	2	A0A078HKE6, M4C9N5	12	0.408648	0.864026
GO:0000786	nucleosome	2	A0A078C4K3, A0A078E0U6	12	0.408648	0.864026
GO:0055081	anion homeostasis	2	A0A078I437, A0A178VRQ2	12	0.408648	0.864026
GO:0004373	glycogen (starch) synthase activity	2	D7KID6, V4KQF7	12	0.408648	0.864026
GO:0045727	positive regulation of translation	2	D7LTD9, R0I6C7	12	0.408648	0.864026
GO:0061630	ubiquitin protein ligase activity	2	A0A178UNX5, A0A178VMR4	12	0.408648	0.864026
GO:0051538	3 iron, 4 sulfur cluster binding	2	A0A178UNP1, V4LKH6	12	0.408648	0.864026
GO:0008361	regulation of cell size	2	A0A087GGA8, D7KLH0	12	0.408648	0.864026
GO:0048366	leaf development	9	A0A087FY81, D7LF25, A0A087G6B2, R0I0R2, A0A078FPP2, R0FMF0, V4MEI2, R0FGI7, D7KLH0	70	0.413158	0.872908
GO:0004857	enzyme inhibitor activity	6	R0GVN4, V4L5K5, V4LT85, A0A078GRZ7, A0A078D3D0, Q9FFE0	45	0.415273	0.876723
GO:0016705	oxidoreductase activity, acting on paired donors, with incorporation or reduction of molecular oxygen	8	V5Q698, V4L9M5, R0G495, Q9M591, U5KK11, A0A0D3AG00, Q93VW5, A0A0A0N2Z4	62	0.420291	0.886655
GO:0006635	fatty acid beta-oxidation	5	V4P148, R0HP78, V4KPT6, V4MN80, V4LNI4	37	0.422726	0.889139
GO:0009062	fatty acid catabolic process	5	V4P148, R0HP78, V4KPT6, V4MN80, V4LNI4	37	0.422726	0.889139
GO:0008654	phospholipid biosynthetic process	5	F4K0E8, Q0WW96, V4LP72, A0A178V9E4, D7LFE3	37	0.422726	0.889139
GO:0072527	pyrimidine-containing compound metabolic process	5	M4DS51, R0GXD7, A0A087HRR4, A0A078I2R1, D7L0J1	37	0.422726	0.889139
GO:0007010	cytoskeleton organization	7	A0A087HMG0, V4L088, V4M971, A0A0D3B3D4, A0A0D3BI84, V4KY43, B9DGT7	54	0.428062	0.894269
GO:0040029	regulation of gene expression, epigenetic	4	O78310, A0A178VMR4, A0A078E0U6, A9Q115	29	0.430915	0.894269
GO:0006869	lipid transport	4	A0A178UPT8, A0A087FX20, V4MF68, A0A078H0N6	29	0.430915	0.894269
GO:0006633	fatty acid biosynthetic process	11	Q09GN7, A0A078F758, Q570B4, R0HP78, A0A078DXE8, A0A078IEP9, D7MH76, A0A178VSW7, V4KUK0, G4WXD8, D7KLH0	88	0.431086	0.894269
GO:0008509	anion transmembrane transporter activity	6	R0EVP1, D7KS71, A0A078HQA4, A0A178UZD4, R0GQQ8, R0FWY6	46	0.436654	0.894269
GO:0042175	nuclear outer membrane-endoplasmic reticulum membrane network	12	A0A178V0E9, D7LZA7, D7MM37, B0ZX82, D7LRR8, D7M5S1, A0A0A0N2Z4, A0A078GLC2, Q570B4, R0GXG8, A0A078EVL1, Q0WW96	97	0.438519	0.894269
GO:0005789	endoplasmic reticulum membrane	12	A0A078GLC2, A0A178V0E9, Q570B4, D7LZA7, R0GXG8, D7MM37, A0A078EVL1, B0ZX82, Q0WW96, D7LRR8, D7M5S1, A0A0A0N2Z4	97	0.438519	0.894269
[truncated: 1,477 more rows]
