# Supplementary material for: Understanding the response in Pugionium cornutum (L.) Gaertn. seedling leaves under drought stress using transcriptome and proteome integrated analysis
Source: PeerJ. 2023 Apr 3;11:e15165. doi: 10.7717/peerj.15165 (PMC10078451; doi:10.7717/peerj.15165)
Supplement: Supplemental Information 12 [file peerj-11-15165-s012.xlsx]

## Sheet: Sheet1
C41814_g2		目的基因Ct值	内参基因Ct值	δCt	mean δCt	δδCt	2-δδCt
	L1-1	28.34	22.35	5.99	5.80111	0	1
	L1-1	28.17	22.47	5.7
	L1-1	27.56	22.16	5.4
	L1-2	28.23	22.65	5.58
	L1-2	28.11	22.19	5.92
	L1-2	28.54	22.44	6.1
	L1-3	28.15	22.38	5.77
	L1-3	27.79	22.38	5.41
	L1-3	28.41	22.07	6.34
	L2-1	20.78	22.36	-1.58	-1.33667	-7.13778	140.827
	L2-1	21.33	22.43	-1.1
	L2-1	20.85	22.13	-1.28
	L2-2	21.54	22.65	-1.11
	L2-2	20.64	22.28	-1.64
	L2-2	20.73	22.19	-1.46
	L2-3	20.95	22.57	-1.62
	L2-3	21.15	22.41	-1.26
	L2-3	21.09	22.07	-0.98
	L3-1	19.59	22.15	-2.56	-2.80556	-8.60667	389.821
	L3-1	20.11	22.61	-2.5
	L3-1	19.85	22.14	-2.29
	L3-2	18.98	21.99	-3.01
	L3-2	19.15	22.77	-3.62
	L3-2	18.77	22.26	-3.49
	L3-3	19.71	22.53	-2.82
	L3-3	19.59	22.38	-2.79
	L3-3	20.09	22.26	-2.17
C40538_g1	L1-1	27.85	22.35	5.5	5.68	0	1
	L1-1	27.49	22.47	5.02
	L1-1	28.21	22.16	6.05
	L1-2	28.37	22.65	5.72
	L1-2	27.88	22.19	5.69
	L1-2	28.46	22.44	6.02
	L1-3	27.92	22.38	5.54
	L1-3	27.55	22.38	5.17
	L1-3	28.48	22.07	6.41
	L2-1	27.56	22.36	5.2	4.93778	-0.742222	1.67275
	L2-1	26.91	22.43	4.48
	L2-1	27.04	22.13	4.91
	L2-2	27.12	22.65	4.47
	L2-2	27.88	22.28	5.6
	L2-2	26.74	22.19	4.55
	L2-3	27.85	22.57	5.28
	L2-3	27.07	22.41	4.66
	L2-3	27.36	22.07	5.29
	L3-1	24.53	22.15	2.38	2.43778	-3.24222	9.46251
	L3-1	24.22	22.61	1.61
	L3-1	25.49	22.14	3.35
	L3-2	24.63	21.99	2.64
	L3-2	25.07	22.77	2.3
	L3-2	24.39	22.26	2.13
	L3-3	25.65	22.53	3.12
	L3-3	24.29	22.38	1.91
	L3-3	24.76	22.26	2.5
C30518_g1	L1-1	27.73	22.35	5.38	5.51444	0	1
	L1-1	28.21	22.47	5.74
	L1-1	27.48	22.16	5.32
	L1-2	28.03	22.65	5.38
	L1-2	28.17	22.19	5.98
	L1-2	27.66	22.44	5.22
	L1-3	27.89	22.38	5.51
	L1-3	28.04	22.38	5.66
	L1-3	27.51	22.07	5.44
	L2-1	26.65	22.36	4.29	3.74333	-1.77111	3.41317
	L2-1	26.09	22.43	3.66
	L2-1	26.52	22.13	4.39
	L2-2	25.31	22.65	2.66
	L2-2	26.38	22.28	4.1
	L2-2	25.58	22.19	3.39
	L2-3	26.29	22.57	3.72
	L2-3	25.41	22.41	3
	L2-3	26.55	22.07	4.48
	L3-1	23.65	22.15	1.5	0.976667	-4.53778	23.2278
	L3-1	23.57	22.61	0.96
	L3-1	22.88	22.14	0.74
	L3-2	24.06	21.99	2.07
	L3-2	23.82	22.77	1.05
	L3-2	22.84	22.26	0.58
	L3-3	22.32	22.53	-0.21
	L3-3	22.88	22.38	0.5
	L3-3	23.86	22.26	1.6
C51939_g1	L1-1	27.78	21.89	5.89	5.56	0	1
	L1-1	28.21	22.35	5.86
	L1-1	27.93	22.44	5.49
	L1-2	28.06	22.59	5.47
	L1-2	27.27	22.01	5.26
	L1-2	27.65	21.97	5.68
	L1-3	28.46	22.33	6.13
	L1-3	27.15	22.51	4.64
	L1-3	27.37	21.75	5.62
	L2-1	24.68	22.03	2.65	2.66	-2.9	7.46426
	L2-1	25.33	21.92	3.41
	L2-1	25.11	22.18	2.93
	L2-2	24.39	22.31	2.08
	L2-2	25.29	21.45	3.84
	L2-2	25.09	22.36	2.73
	L2-3	24.47	22.76	1.71
	L2-3	25.14	22.37	2.77
	L2-3	24.67	22.85	1.82
	L3-1	23.66	22.33	1.33	1.28222	-4.27778	19.3972
	L3-1	22.91	22.59	0.32
	L3-1	23.57	21.84	1.73
	L3-2	23.83	22.69	1.14
	L3-2	23.26	22.81	0.45
	L3-2	23.61	22.73	0.88
	L3-3	24.18	22.06	2.12
	L3-3	24.32	21.98	2.34
	L3-3	23.68	22.45	1.23
C44516_g1	L1-1	28.06	21.89	6.17	5.65333	0	1
	L1-1	27.59	22.35	5.24
	L1-1	28.33	22.44	5.89
	L1-2	27.15	22.59	4.56
	L1-2	26.32	22.01	4.31
	L1-2	27.89	21.97	5.92
	L1-3	28.55	22.33	6.22
	L1-3	29.11	22.51	6.6
	L1-3	27.72	21.75	5.97
	L2-1	25.25	22.03	3.22	2.91889	-2.73444	6.65503
	L2-1	24.88	21.92	2.96
	L2-1	25.53	22.18	3.35
	L2-2	24.76	22.31	2.45
	L2-2	25.49	21.45	4.04
	L2-2	25.41	22.36	3.05
	L2-3	25.81	22.76	3.05
	L2-3	24.26	22.37	1.89
	L2-3	25.11	22.85	2.26
	L3-1	24.63	22.33	2.3	2.83111	-2.82222	7.07251
	L3-1	25.07	22.59	2.48
	L3-1	25.26	21.84	3.42
	L3-2	25.49	22.69	2.8
	L3-2	24.81	22.81	2
	L3-2	25.94	22.73	3.21
	L3-3	24.33	22.06	2.27
	L3-3	25.55	21.98	3.57
	L3-3	25.88	22.45	3.43
C50789_g1	L1-1	26.36	21.89	4.47	3.69778	0	1
	L1-1	25.97	22.35	3.62
	L1-1	26.12	22.44	3.68
	L1-2	26.52	22.59	3.93
	L1-2	25.73	22.01	3.72
	L1-2	26.25	21.97	4.28
	L1-3	25.19	22.33	2.86
	L1-3	25.64	22.51	3.13
	L1-3	25.34	21.75	3.59
	L2-1	26.48	22.03	4.45	4.31	0.612222	0.654188
	L2-1	26.03	21.92	4.11
	L2-1	26.33	22.18	4.15
	L2-2	27.17	22.31	4.86
	L2-2	26.47	21.45	5.02
	L2-2	26.13	22.36	3.77
	L2-3	26.86	22.76	4.1
	L2-3	26.51	22.37	4.14
	L2-3	27.04	22.85	4.19
	L3-1	26.89	22.33	4.56	4.02111	0.323333	0.799221
	L3-1	25.54	22.59	2.95
	L3-1	26.67	21.84	4.83
	L3-2	26.26	22.69	3.57
	L3-2	26.87	22.81	4.06
	L3-2	25.53	22.73	2.8
	L3-3	26.14	22.06	4.08
	L3-3	26.85	21.98	4.87
	L3-3	26.92	22.45	4.47
C46759_g1	L1-1	29.53	21.89	7.64	6.92778	0	1
	L1-1	28.77	22.35	6.42
	L1-1	29.65	22.44	7.21
	L1-2	29.27	22.59	6.68
	L1-2	28.41	22.01	6.4
	L1-2	28.82	21.97	6.85
	L1-3	29.46	22.33	7.13
	L1-3	29.53	22.51	7.02
	L1-3	28.75	21.75	7
	L2-1	27.75	22.03	5.72	5.38	-1.54778	2.92366
	L2-1	27.16	21.92	5.24
	L2-1	28.28	22.19	6.09
	L2-2	27.53	22.31	5.22
	L2-2	28.08	21.45	6.63
	L2-2	27.44	22.36	5.08
	L2-3	27.01	22.76	4.25
	L2-3	28.19	22.37	5.82
	L2-3	27.22	22.85	4.37
	L3-1	26.51	22.33	4.18	4.1275	-2.80028	6.96575
	L3-1	26.39	22.59	3.8
	L3-1	26.09	21.84	4.25
	L3-2	26.18	22.69	3.49
	L3-2	26.33	22.81	3.52
	L3-2	26.57	22.73	3.84
	L3-3	26.95	22.06	4.89
	L3-3	27.03	21.98	5.05
	L3-3		22.45
